# Supplementary material for: The boundary of life and death: changes in mitochondrial and cytosolic proteomes associated with programmed cell death of Arabidopsis thaliana suspension culture cells
Source: Front Plant Sci. 2023 Aug 1;14:1194866. doi: 10.3389/fpls.2023.1194866 (PMC10431908; doi:10.3389/fpls.2023.1194866)
Supplement: Supplementary file 2 [file Table_1.xlsx]

## Sheet: Table S1
Supplemental Table S1: Proteins detected via MS in control (untreated) cytosolic and mitochondrial fractions of A. thaliana suspension culture.
Proteins previously included in meta-analysis of Arabidopsis mitochondrial proteome published by Jiang et al (2021) are highlighted in green.
Proteins unique to mitochondrial fraction predicted to be mitochondrial by both SUBA4 and MuLoc are are highlighted in orange (27 proteins).
Proteins unique to the mitochondrial fraction only predicted by MuLoc to be mitochondrial are highlighted in red (6 proteins).
Proteins unique to the mitochondrial fraction only predicted by SUBAcon to be mitochondrial are highlighted in blue (6 proteins).
Protein ID
Total proteins (2674)	Unique Cyto (1062)	Unique Mito (688)	Total Cyto (1986)	Total Mito (1612)
AT1G01050	AT1G02500	AT1G15220	AT1G01090	AT1G01090
AT1G01090	AT1G03220	AT1G26750	AT1G02500	AT1G01290
AT1G01290	AT1G04270	AT1G27435	AT1G02560	AT1G01710
AT1G01710	AT1G05520	AT1G47278	AT1G02780	AT1G01820
AT1G01820	AT1G07670	AT1G71730	AT1G02920	AT1G02370
AT1G02130	AT1G11840	AT1G76060	AT1G02930	AT1G02560
AT1G02305	AT1G11910	AT1G78890	AT1G03220	AT1G02780
AT1G02370	AT1G13320	AT2G44620	AT1G03475	AT1G02920
AT1G02500	AT1G14320	AT2G46540	AT1G03680	AT1G02930
AT1G02560	AT1G15750	AT3G03070	AT1G04270	AT1G03030
AT1G02780	AT1G18540	AT3G16700	AT3G04400	AT1G03090
AT1G02920	AT1G20220	AT3G62460	AT1G04690	AT1G03475
AT1G02930	AT1G21080	AT3G62920	AT1G05520	AT1G03680
AT1G03030	AT1G26850	AT4G21090	AT1G07670	AT1G03860
AT1G03090	AT1G29150	AT4G25840	AT1G07890	AT3G04400
AT1G03220	AT1G33590	AT4G28060	AT1G08110	AT1G04630
AT1G03475	AT1G33680	AT5G04750	AT1G08130	AT1G04690
AT1G03680	AT1G35670	AT5G11750	AT1G08360	AT1G05270
AT1G03860	AT1G37130	AT5G40080	AT1G09620	AT1G06130
AT1G04170	AT1G41880	AT5G45590	AT1G09640	AT1G06290
AT1G04270	AT1G43190	AT5G49210	AT1G11840	AT1G06530
AT1G04410	AT1G47128	AT5G52370	AT1G11910	AT1G06950
AT3G04400	AT1G50380	AT5G54550	AT1G12000	AT1G07040
AT1G04630	AT1G50600	AT5G59613	AT1G12840	AT1G07210
AT1G04690	AT1G51660	AT5G64670	AT1G13320	AT1G07830
AT1G05270	AT1G51680	AT5G67490	AT1G13440	AT1G07890
AT1G05520	AT1G53210	ATMG00290	AT1G14320	AT1G08110
AT1G06130	AT1G54100	AT1G04710	AT1G14610	AT1G08130
AT1G06220	AT1G71820	AT1G62850	AT1G14810	AT1G08360
AT1G06290	AT1G74020	AT2G23820	AT1G14830	AT1G08480
AT1G06400	AT1G76140	AT4G27760	AT1G14980	AT1G08490
AT1G06530	AT1G77550	AT5G23395	AT1G15060	AT1G09130
AT1G06950	AT1G78850	ATCG00770	AT1G15140	AT1G09300
AT1G07040	AT1G79990	AT2G21640	AT1G15500	AT1G09620
AT1G07210	AT2G01720	AT4G08280	AT1G15690	AT1G09640
AT1G07670	AT2G03820	AT4G23760	AT1G15750	AT1G09830
AT1G07750	AT2G09990	AT5G24165	AT1G17290	AT1G10270
AT1G07830	AT2G14120	ATMG00480	AT1G18080	AT1G11390
AT1G07890	AT2G16485	ATMG01270	AT1G18500	AT1G11860
AT1G08110	AT2G16780	AT1G01290	AT1G19920	AT1G11870
AT1G08130	AT2G17840	AT1G01710	AT1G20200	AT1G12000
AT1G08360	AT2G21160	AT1G01820	AT1G20220	AT1G12410
AT1G08480	AT2G21620	AT1G02370	AT1G20330	AT1G12840
AT1G08490	AT2G27020	AT1G03030	AT1G20620	AT1G13440
AT1G09010	AT2G27170	AT1G03090	AT1G20630	AT1G14610
AT1G09130	AT2G29560	AT1G03860	AT1G21080	AT1G14620
AT1G09150	AT2G30860	AT1G04630	AT1G21750	AT1G14810
AT1G09210	AT2G33470	AT1G05270	AT1G22840	AT1G14830
AT1G09300	AT2G34040	AT1G06130	AT1G24180	AT1G14980
AT1G09620	AT2G36130	AT1G06290	AT1G24360	AT1G15060
AT1G09640	AT2G36160	AT1G06530	AT1G24510	AT1G15120
AT1G09780	AT2G37550	AT1G06950	AT1G26110	AT1G15140
AT1G09830	AT2G37760	AT1G07040	AT1G26630	AT1G15390
AT1G10200	AT2G39700	AT1G07210	AT1G26850	AT1G15480
AT1G10270	AT2G47390	AT1G07830	AT1G27450	AT1G15500
AT1G10290	AT3G02200	AT1G08480	AT1G29150	AT1G15690
AT1G10670	AT3G02520	AT1G08490	AT1G29880	AT1G15710
AT1G10840	AT3G05590	AT1G09130	AT1G29900	AT1G15810
AT1G11260	AT3G07100	AT1G09300	AT1G30510	AT1G15870
AT1G11360	AT3G08030	AT1G09830	AT1G31180	AT1G16300
AT1G11390	AT3G11130	AT1G10270	AT1G31190	AT1G16740
AT1G11650	AT3G12500	AT1G11390	AT1G31230	AT1G16870
AT1G11660	AT3G13060	AT1G11860	AT1G31860	AT1G17160
AT1G11840	AT3G15980	AT1G11870	AT1G32200	AT1G17290
AT1G11860	AT3G16830	AT1G12410	AT1G32440	AT1G17350
AT1G11870	AT3G18860	AT1G14620	AT1G33120	AT1G18080
AT1G11910	AT3G20630	AT1G15120	AT1G33590	AT1G18480
AT1G12000	AT3G42170	AT1G15390	AT1G33680	AT1G18500
AT1G12310	AT3G43300	AT1G15480	AT1G34430	AT1G18630
AT1G12410	AT3G44300	AT1G15710	AT1G35160	AT1G19140
AT1G12840	AT3G44330	AT1G15810	AT1G35670	AT1G19520
AT1G13320	AT3G44340	AT1G15870	AT1G36280	AT1G19580
AT1G13440	AT3G44750	AT1G16300	AT1G37130	AT1G19920
AT1G13950	AT3G46030	AT1G16740	AT1G41880	AT1G20200
AT1G14320	AT3G46440	AT1G16870	AT1G43170	AT1G20330
AT1G14610	AT3G48750	AT1G17160	AT1G43190	AT1G20430
AT1G14620	AT3G48990	AT1G17350	AT1G43890	AT1G20510
AT1G14810	AT3G49430	AT1G18480	AT1G47128	AT1G20560
AT1G14830	AT3G50670	AT1G18630	AT1G47260	AT1G20620
AT1G14980	AT3G52390	AT1G19140	AT1G47420	AT1G20630
AT1G15000	AT3G53870	AT1G19520	AT1G48030	AT1G21750
AT1G15060	AT3G54150	AT1G19580	AT1G48420	AT1G22300
AT1G15120	AT3G54440	AT1G20430	AT1G48630	AT1G22410
AT1G15130	AT3G56150	AT1G20510	AT1G48830	AT1G22450
AT1G15140	AT3G57090	AT1G20560	AT1G48850	AT1G22800
AT1G15220	AT3G59020	AT1G22450	AT1G48860	AT1G22840
AT1G15390	AT3G60240	AT1G22800	AT1G48920	AT1G23100
AT1G15480	AT3G61540	AT1G23100	AT1G49670	AT1G24180
AT1G15500	AT3G61820	AT1G24280	AT1G49760	AT1G24280
AT1G15690	AT3G62310	AT1G24610	AT1G50200	AT1G24360
AT1G15710	AT3G62870	AT1G26460	AT1G50380	AT1G24510
AT1G15750	AT4G05420	AT1G27390	AT1G50510	AT1G24610
AT1G15810	AT4G08790	AT1G30680	AT1G50600	AT1G26110
AT1G15870	AT4G08950	AT1G31160	AT5G54640	AT1G26460
AT1G16300	AT4G10480	AT1G31760	AT1G51560	AT1G26630
AT1G16350	AT4G11260	AT1G31817	AT1G51630	AT1G27390
AT1G16740	AT4G12650	AT1G32220	AT1G51660	AT1G27450
AT1G16870	AT4G14160	AT1G32380	AT1G51680	AT1G29880
AT1G17160	AT4G14570	AT1G32470	AT1G51710	AT1G29900
AT1G17290	AT4G16143	AT1G32500	AT1G51980	AT1G30510
AT1G17350	AT4G16660	AT1G33780	AT1G52760	AT1G30680
AT1G17880	AT4G19210	AT1G34360	AT1G53210	AT1G31160
AT1G18070	AT4G20850	AT1G35620	AT1G53240	AT1G31180
AT1G18080	AT4G23630	AT1G42960	AT1G53580	AT1G31190
AT1G18480	AT4G23650	AT1G44170	AT1G53750	AT1G31230
AT1G18500	AT4G24820	AT1G45332	AT1G54100	AT1G31760
AT1G18540	AT4G26630	AT1G47750	AT1G54270	AT1G31817
AT1G18630	AT4G26870	AT1G48200	AT1G54630	AT1G31860
AT1G19140	AT4G27450	AT1G48520	AT1G55490	AT1G32200
AT1G19520	AT4G31340	AT1G49140	AT1G56070	AT1G32220
AT1G19580	AT4G31700	AT1G49400	AT1G56110	AT1G32380
AT1G19880	AT4G32640	AT1G49970	AT1G57720	AT1G32440
AT1G19920	AT4G33650	AT1G50170	AT1G59610	AT1G32470
AT1G20110	AT4G34180	AT1G50940	AT1G59870	AT1G32500
AT1G20200	AT4G39230	AT1G51390	AT1G59900	AT1G33120
AT1G20220	AT4G39730	AT1G51650	AT1G61250	AT1G33780
AT1G20330	AT5G03740	AT1G52670	AT1G61570	AT1G34360
AT1G20430	AT5G05010	AT1G53000	AT1G62020	AT1G34430
AT1G20450	AT5G07350	AT1G53460	AT1G62640	AT1G35160
AT1G20510	AT5G08570	AT1G53645	AT1G62750	AT1G35620
AT1G20560	AT5G09900	AT1G53760	AT1G63660	AT1G36280
AT1G20580	AT5G11200	AT1G54220	AT1G63770	AT1G42960
AT1G20620	AT5G12370	AT1G54340	AT1G63940	AT1G43170
AT1G20630	AT5G14170	AT1G55160	AT1G64090	AT1G43890
AT1G20693	AT5G15490	AT1G55805	AT1G64520	AT1G44170
AT1G20950	AT5G17020	AT1G55890	AT1G65930	AT1G45332
AT1G20960	AT5G21160	AT1G55900	AT1G65980	AT1G47260
AT1G21080	AT5G35430	AT1G56050	AT1G66240	AT1G47420
AT1G21380	AT5G36230	AT1G56190	AT1G66580	AT1G47750
AT1G21680	AT5G40760	AT1G56560	AT1G69740	AT1G48030
AT1G21690	AT5G44070	AT1G57610	AT1G69830	AT1G48200
AT1G21750	AT5G44500	AT1G58080	AT1G69840	AT1G48420
AT1G22300	AT5G46070	AT1G59990	AT1G70770	AT1G48520
AT1G22410	AT5G47010	AT1G60770	AT1G71380	AT1G48630
AT1G22450	AT5G47770	AT1G61870	AT1G71820	AT1G48830
AT1G22530	AT5G48230	AT1G61980	AT1G72330	AT1G48850
AT1G22800	AT5G51430	AT1G61990	AT1G72370	AT1G48860
AT1G22840	AT5G51660	AT1G62010	AT1G72810	AT1G48920
AT1G22920	AT5G52240	AT1G62730	AT1G74020	AT1G49140
AT1G23100	AT5G53300	AT1G63500	AT1G74030	AT1G49400
AT1G24180	AT5G53850	AT1G63610	AT1G74040	AT1G49670
AT1G24280	AT5G54310	AT1G64190	AT1G74230	AT1G49760
AT1G24360	AT5G54640	AT1G64880	AT1G74260	AT1G49970
AT1G24510	AT5G56000	AT1G65260	AT1G75330	AT1G50170
AT1G24610	AT5G57655	AT1G65290	AT1G76140	AT1G50200
AT1G25350	AT5G58060	AT1G65540	AT1G76150	AT1G50510
AT1G26110	AT5G58490	AT1G67090	AT1G76160	AT1G50940
AT1G26460	AT5G59440	AT1G67350	AT1G76180	AT1G51390
AT1G26630	AT5G61510	AT1G68680	AT1G77120	AT1G51560
AT1G26750	AT5G61780	AT1G69210	AT1G77550	AT1G51630
AT1G26850	AT5G64370	AT1G69370	AT1G77590	AT1G51650
AT1G27090	AT5G64460	AT1G70190	AT1G78300	AT1G51710
AT1G27390	AT5G65020	AT1G70570	AT1G78380	AT1G51980
AT1G27400	AT1G01300	AT1G71260	AT1G78850	AT1G52670
AT1G27435	AT1G01910	AT1G71310	AT1G78900	AT1G52760
AT1G27450	AT1G01940	AT1G72750	AT1G79230	AT1G53000
AT5G42820	AT1G01960	AT1G73940	AT1G79440	AT1G53240
AT1G27970	AT1G02080	AT1G74960	AT1G79530	AT1G53460
AT1G28200	AT1G02140	AT1G75200	AT1G79550	AT1G53580
AT1G29150	AT1G02305	AT1G76405	AT1G79750	AT1G53645
AT1G29880	AT1G02690	AT1G77670	AT1G79990	AT1G53750
AT1G29900	AT1G02840	AT1G77750	AT1G80410	AT1G53760
AT1G30070	AT1G03110	AT1G79010	AT1G80560	AT1G54220
AT1G30510	AT1G03330	AT1G79390	AT1G80600	AT1G54270
AT1G30580	AT1G03350	AT1G80230	AT2G01140	AT1G54340
AT1G30680	AT1G04080	AT1G80270	AT2G01250	AT1G54630
AT1G31160	AT1G04170	AT1G80480	AT2G01720	AT1G55160
AT1G31180	AT1G04810	AT1G80620	AT2G01970	AT1G55490
AT1G31190	AT1G04850	AT1G80720	AT2G02740	AT1G55805
AT1G31230	AT1G04870	AT2G01350	AT2G03510	AT1G55890
AT1G31340	AT1G05010	AT2G02050	AT2G03820	AT1G55900
AT1G31730	AT1G05350	AT2G02500	AT2G04030	AT1G56050
AT1G31760	AT1G05620	AT2G02510	AT2G04350	AT1G56070
AT1G31812	AT1G06210	AT2G03670	AT2G04400	AT1G56110
AT1G31817	AT1G06220	AT2G03690	AT2G05710	AT1G56190
AT1G31860	AT1G06400	AT2G04540	AT2G05920	AT1G56560
AT1G32200	AT1G06410	AT2G04940	AT2G05990	AT1G57610
AT1G32220	AT1G06570	AT2G06050	AT2G06850	AT1G57720
AT1G32380	AT1G06760	AT2G13560	AT2G07050	AT1G58080
AT1G32440	AT1G06900	AT2G14170	AT2G07698	AT1G59610
AT1G32470	AT1G07370	AT2G15570	AT2G09990	AT1G59870
AT1G32500	AT1G07990	AT2G15690	AT2G14120	AT1G59900
AT1G33120	AT1G08370	AT2G16460	AT2G15620	AT1G59990
AT1G33590	AT1G08420	AT2G16640	AT1G18540	AT1G60770
AT1G33680	AT1G08780	AT2G16930	AT2G16060	AT1G61250
AT1G33780	AT1G08880	AT2G17130	AT1G74050	AT1G61570
AT1G34360	AT1G08980	AT2G17670	AT2G16485	AT1G61870
AT1G34430	AT1G09010	AT2G18330	AT2G16570	AT1G61980
AT1G35160	AT1G09150	AT2G18520	AT2G16600	AT1G61990
AT1G35620	AT1G09270	AT2G19080	AT2G16780	AT1G62010
AT1G35670	AT1G09490	AT2G19490	AT2G17265	AT1G62020
AT1G35720	AT1G09760	AT2G19680	AT2G17420	AT1G62640
AT1G36280	AT1G09770	AT2G19860	AT2G17630	AT1G62730
AT1G36730	AT1G10200	AT2G20060	AT2G17840	AT1G62750
AT1G37130	AT1G10290	AT2G20360	AT2G18020	AT1G63500
AT1G41880	AT1G10590	AT2G20530	AT2G18960	AT1G63610
AT1G42960	AT1G10670	AT2G20690	AT2G19480	AT1G63660
AT1G43170	AT1G10840	AT2G20800	AT2G19730	AT1G63770
AT1G43190	AT1G10940	AT2G20860	AT2G19940	AT1G63940
AT1G43890	AT1G11360	AT2G20940	AT2G20270	AT1G64090
AT1G44170	AT1G11650	AT2G22500	AT2G20420	AT1G64190
AT1G44820	AT1G11660	AT2G23370	AT2G20580	AT1G64520
AT1G45332	AT1G11890	AT2G25080	AT2G20890	AT1G64880
AT1G47128	AT1G12270	AT2G25140	AT2G20990	AT1G65260
AT1G47200	AT1G12920	AT2G25570	AT2G21160	AT1G65290
AT1G47260	AT1G13020	AT2G25830	AT2G21170	AT1G65540
AT1G47278	AT1G13060	AT2G25840	AT2G21330	AT1G65930
AT1G47420	AT1G13690	AT2G26080	AT2G21390	AT1G65980
AT1G47550	AT1G13950	AT2G26140	AT2G21620	AT1G66240
AT1G47750	AT1G14710	AT2G26230	AT2G21660	AT1G66580
AT1G48030	AT1G15000	AT2G27680	AT2G21870	AT1G67090
AT1G48200	AT1G15130	AT2G27730	AT2G22230	AT1G67350
AT1G48410	AT1G15230	AT2G28430	AT2G22250	AT1G68680
AT1G48420	AT1G15280	AT2G29080	AT2G22450	AT1G69210
AT1G48520	AT1G15340	AT2G29530	AT2G22480	AT1G69370
AT1G48630	AT1G15790	AT2G29990	AT2G22780	AT1G69740
AT1G48830	AT1G15910	AT2G30720	AT2G23350	AT1G69830
AT1G48850	AT1G15930	AT2G30920	AT2G24020	AT1G69840
AT1G48860	AT1G16350	AT2G31060	AT2G27020	AT1G70190
AT1G48900	AT1G16520	AT2G31140	AT2G27170	AT1G70570
AT1G48920	AT1G17710	AT2G31240	AT2G28000	AT1G70770
AT1G49140	AT1G17890	AT2G31350	AT2G29550	AT1G71260
AT1G49400	AT1G18070	AT2G31490	AT2G29560	AT1G71310
AT1G49670	AT1G18210	AT2G31725	AT2G29960	AT1G71380
AT1G49760	AT1G18450	AT2G33040	AT2G30200	AT1G72330
AT1G49820	AT1G19130	AT2G33220	AT2G30490	AT1G72370
AT1G49970	AT1G19570	AT2G33800	AT2G30860	AT1G72750
AT1G50110	AT1G19880	AT2G34050	AT2G30870	AT1G72810
AT1G50170	AT1G20110	AT2G34630	AT2G30970	AT1G73940
AT1G50200	AT1G20370	AT2G35010	AT2G31390	AT1G74030
AT1G50370	AT1G20450	AT2G35120	AT2G31610	AT1G74040
AT1G50380	AT1G20580	AT2G35240	AT2G31670	AT1G74050
AT1G50480	AT1G20693	AT2G35490	AT2G31810	AT1G74230
AT1G50510	AT1G20950	AT2G35605	AT2G32520	AT1G74260
AT1G50600	AT1G20960	AT2G35720	AT2G32920	AT1G74960
AT1G50940	AT1G21380	AT2G35795	AT2G33150	AT1G75200
AT5G54640	AT1G21630	AT2G35900	AT2G33210	AT1G75330
AT1G51390	AT1G21680	AT2G36070	AT1G22410	AT1G76150
AT1G51560	AT1G21690	AT2G36250	AT2G33470	AT1G76160
AT1G51590	AT1G21720	AT2G37020	AT1G22300	AT1G76180
AT1G51630	AT1G22270	AT2G37230	AT2G34040	AT1G76405
AT1G51650	AT1G22920	AT2G37410	AT2G34480	AT1G77120
AT1G51660	AT1G23190	AT2G37660	AT2G34590	AT1G77590
AT1G51680	AT1G23290	AT2G37860	AT2G35040	AT1G77670
AT1G51710	AT1G23820	AT2G38660	AT2G36130	AT1G77750
AT1G51980	AT1G24050	AT2G38670	AT2G36460	AT1G78300
AT1G52340	AT1G25211	AT2G39270	AT2G36530	AT1G78380
AT1G52360	AT1G25350	AT2G39795	AT2G36580	AT1G78900
AT1G52670	AT1G26570	AT2G39970	AT2G36880	AT1G79010
AT1G52760	AT1G27130	AT2G40765	AT2G37270	AT1G79230
AT1G53000	AT1G27310	AT2G41040	AT2G37550	AT1G79390
AT1G53210	AT1G28120	AT2G42210	AT2G37690	AT1G79440
AT1G53240	AT1G28200	AT2G42310	AT2G38040	AT1G79530
AT1G53310	AT1G28350	AT2G42490	AT2G38550	AT1G79550
AT1G53460	AT1G29350	AT2G42710	AT2G39080	AT1G79750
AT1G53580	AT1G29850	AT2G43030	AT3G55280	AT1G80230
AT1G53645	AT1G29990	AT2G43360	AT2G39700	AT1G80270
AT1G53750	AT1G30070	AT2G43400	AT2G39730	AT1G80410
AT1G53760	AT1G30470	AT2G43950	AT2G40490	AT1G80480
AT1G54100	AT1G30630	AT2G44065	AT2G41220	AT1G80560
AT1G54220	AT1G31070	AT2G44525	AT2G41380	AT1G80600
AT1G54270	AT1G31730	AT2G44640	AT2G41840	AT1G80620
AT1G54340	AT1G32490	AT2G45030	AT2G42590	AT1G80720
AT1G54630	AT1G35140	AT2G45060	AT5G45775	AT2G01140
AT1G55150	AT1G35580	AT2G45140	AT2G42790	AT2G01250
AT1G55160	AT1G35780	AT2G45740	AT2G42910	AT2G01350
AT1G55210	AT1G36310	AT2G45960	AT2G43090	AT2G01970
AT1G55480	AT1G36730	AT2G46110	AT2G43710	AT2G02050
AT1G55490	AT1G43670	AT2G47380	AT2G43750	AT2G02500
AT1G55805	AT1G43690	AT3G01130	AT2G44050	AT2G02510
AT1G55890	AT1G43700	AT3G01740	AT2G44060	AT2G02740
AT1G55900	AT1G43710	AT3G01790	AT2G44120	AT2G03510
AT1G56050	AT1G44790	AT3G01800	AT2G44350	AT2G03670
AT1G56070	AT1G44820	AT3G02650	AT2G44450	AT2G03690
AT1G56110	AT1G44835	AT3G02660	AT2G44530	AT2G04030
AT1G56190	AT1G44900	AT3G03060	AT2G44610	AT2G04350
AT1G56450	AT1G44910	AT3G03100	AT2G44650	AT2G04400
AT1G56560	AT1G47550	AT3G03590	AT2G45300	AT2G04540
AT1G57610	AT1G47710	AT3G03600	AT2G45440	AT2G04940
AT1G57720	AT1G48160	AT3G04950	AT2G45990	AT2G05710
AT1G58080	AT1G48410	AT3G05020	AT2G46280	AT2G05920
AT1G59610	AT1G48900	AT3G05970	AT2G47390	AT2G05990
AT1G59870	AT1G49340	AT3G06040	AT2G47470	AT2G06050
AT1G59900	AT1G49600	AT3G06483	AT2G47510	AT2G06850
AT1G59960	AT1G49660	AT3G06790	AT3G01120	AT2G07050
AT1G59990	AT1G50110	AT3G06850	AT3G01910	AT2G07698
AT1G60070	AT1G50370	AT3G07060	AT3G02080	ATMG00210
AT1G60420	AT1G50500	AT3G07480	AT3G02090	AT2G13560
AT1G60690	AT1G50570	AT3G07630	AT3G02200	AT2G14170
AT1G60710	AT1G50670	AT3G08950	AT3G02360	AT2G15570
AT1G60770	AT1G51360	AT3G09810	AT3G02520	AT2G15620
AT1G60780	AT1G51510	AT3G10370	AT3G02530	AT2G15690
AT1G60810	AT1G52260	AT3G10670	AT3G02630	AT2G16060
AT1G61250	AT1G52340	AT3G10690	AT3G02780	AT2G16460
AT1G61570	AT1G52360	AT3G11070	AT3G03960	AT2G16570
AT1G61580	AT1G52380	AT3G12260	AT3G04120	AT2G16600
AT1G61870	AT1G52570	AT3G12370	AT3G04790	AT2G16640
AT1G61980	AT1G53500	AT3G12800	AT3G04840	AT2G16930
AT1G61990	AT1G55090	AT3G13150	AT3G05060	AT2G17130
AT1G62010	AT1G55150	AT3G13160	AT3G05590	AT2G17265
AT1G62020	AT1G55210	AT3G13490	AT3G06050	AT2G17420
AT1G62640	AT1G55250	AT3G14150	AT3G06650	AT2G17630
AT1G62730	AT1G55500	AT3G14390	AT3G06810	AT2G17670
AT1G62740	AT1G59359	AT3G15090	AT3G06860	AT2G18020
AT1G62750	AT1G59600	AT3G15360	AT3G07100	AT2G18330
AT1G62850	AT1G59710	AT3G15590	AT3G07110	AT2G18520
AT1G63000	AT1G59760	AT3G15640	AT3G07770	AT2G18960
AT1G63160	AT1G59830	AT3G17300	AT3G08530	AT2G19080
AT1G63220	AT1G59960	AT3G17465	AT3G08580	AT2G19480
AT1G63500	AT1G60070	AT3G17910	AT3G09200	AT2G19490
AT1G63610	AT1G60080	AT3G17970	AT3G09440	AT2G19680
AT1G63660	AT1G60690	AT3G18240	AT3G09630	AT2G19730
AT1G63770	AT1G60710	AT3G18410	AT3G09820	AT2G19860
AT1G63940	AT1G60730	AT3G18580	AT3G11130	AT2G19940
AT1G64090	AT1G60780	AT3G18760	AT3G11630	AT2G20060
AT1G64190	AT1G60810	AT3G19170	AT3G11940	AT2G20270
AT1G64520	AT1G61150	AT3G19440	AT3G12490	AT2G20360
AT1G64550	AT1G61580	AT3G19740	AT3G12500	AT2G20420
AT1G64790	AT1G62390	AT3G20000	AT3G12780	AT2G20530
AT1G64880	AT1G62810	AT3G20970	AT3G13060	AT2G20580
AT1G65260	AT1G63020	AT3G21400	AT3G13470	AT2G20690
AT1G65290	AT1G63160	AT3G22300	AT3G13860	AT2G20800
AT1G65440	AT1G63210	AT3G22310	AT3G13920	AT2G20860
AT1G65540	AT1G63640	AT3G22330	AT3G13930	AT2G20890
AT1G65930	AT1G64550	AT3G22370	AT3G15000	AT2G20940
AT1G65980	AT1G64740	AT3G22845	AT3G15290	AT2G20990
AT1G66240	AT1G64760	AT3G23830	AT3G15660	AT2G21170
AT1G66580	AT1G64790	AT3G24200	AT3G15730	AT2G21330
AT1G67090	AT1G65440	AT3G25120	AT3G16170	AT2G21390
AT1G67120	AT1G65970	AT3G25780	AT3G16910	AT2G21660
AT1G67350	AT1G66070	AT3G26760	AT3G16950	AT2G21870
AT1G67680	AT1G66080	AT3G26770	AT3G17240	AT2G22230
AT1G67930	AT1G66260	AT3G27080	AT3G17390	AT2G22250
AT1G68560	AT1G66530	AT3G27280	AT3G17810	AT2G22450
AT1G68680	AT1G67120	AT3G27380	AT3G17820	AT2G22480
AT1G69210	AT1G67630	AT3G27550	AT3G18190	AT2G22500
AT1G69370	AT1G67680	AT3G27570	AT3G18820	AT2G22780
AT1G69740	AT1G67930	AT3G27820	AT3G18860	AT2G23350
AT1G69830	AT1G68560	AT3G27890	AT3G19820	AT2G23370
AT1G69840	AT1G68790	AT3G27930	AT3G20330	AT2G24020
AT1G70190	AT1G69030	AT3G28700	AT3G20390	AT2G25080
AT1G70570	AT1G69250	AT3G30775	AT3G20630	AT2G25140
AT1G70580	AT1G69410	AT3G45300	AT3G21110	AT2G25570
AT1G70600	AT1G69510	AT3G45740	AT3G22425	AT2G25830
AT1G70730	AT1G69800	AT3G45770	AT3G22890	AT2G25840
AT1G70770	AT1G70310	AT3G47630	AT3G22960	AT2G26080
AT1G71040	AT1G70320	AT3G47833	AT3G23300	AT2G26140
AT1G71220	AT1G70410	AT3G47930	AT3G23400	AT2G26230
AT1G71260	AT1G70730	AT3G48110	AT3G23940	AT2G27680
AT1G71310	AT1G70980	AT3G48140	AT3G23990	AT2G27730
AT1G71380	AT1G71040	AT3G48540	AT3G24170	AT2G28000
AT1G71730	AT1G71440	AT3G48680	AT3G25520	AT2G28430
AT1G71770	AT1G71750	AT3G49080	AT3G25860	AT2G29080
AT1G71820	AT1G71770	AT3G49240	AT3G27740	AT2G29530
AT1G72330	AT1G71790	AT3G49560	AT3G28710	AT2G29550
AT1G72370	AT1G71860	AT3G49680	AT3G29320	AT2G29960
AT1G72750	AT1G71950	AT3G49725	AT3G42050	AT2G29990
AT1G72810	AT1G72550	AT3G50930	AT3G42170	AT2G30200
AT1G73180	AT1G72680	AT3G51010	AT3G43190	AT2G30490
AT1G73940	AT1G72730	AT3G51100	AT3G44110	AT2G30720
AT1G74020	AT1G73010	AT3G51830	AT3G44300	AT2G30870
AT1G74030	AT1G73030	AT3G51840	AT3G44310	AT2G30920
AT1G74040	AT1G73180	AT3G52150	AT3G44340	AT2G30970
AT1G74050	AT1G73250	AT3G52200	AT3G45970	AT2G31060
AT1G74230	AT1G74560	AT3G52570	AT3G46440	AT2G31140
AT1G74260	AT1G74910	AT3G52730	AT3G46560	AT2G31240
AT1G74910	AT1G74920	AT3G52950	AT3G46740	AT2G31350
AT1G74920	AT1G75270	AT3G53900	AT3G47520	AT2G31390
AT1G74960	AT1G75280	AT3G54110	AT3G48000	AT2G31490
AT1G75200	AT1G75780	AT3G54660	AT3G48560	AT2G31610
AT1G75270	AT1G75950	AT3G55400	AT3G48730	AT2G31670
AT1G75280	AT1G75990	AT3G55605	AT3G48930	AT2G31725
AT1G75330	AT1G76010	AT3G55760	AT3G48990	AT2G31810
AT1G75780	AT1G76540	AT3G56430	AT3G49010	AT2G32520
AT1G76010	AT1G76680	AT3G56940	AT3G49430	AT2G32920
AT1G76060	AT1G76810	AT3G57280	AT3G49720	AT2G33040
AT1G76140	AT1G76850	AT3G58840	AT3G50670	AT2G33150
AT1G76150	AT1G76860	AT3G59280	AT3G51260	AT2G33210
AT1G76160	AT1G77470	AT3G59650	AT3G51800	AT2G33220
AT1G76180	AT1G77710	AT3G59760	AT3G52300	AT2G33800
AT1G76405	AT1G77940	AT3G59820	AT3G52380	AT2G34050
AT1G76550	AT1G78060	AT3G60510	AT3G52390	AT2G34480
AT1G76810	AT1G78680	AT3G61070	AT3G52880	AT2G34590
AT1G76850	AT1G79260	AT3G61440	AT3G52930	AT2G34630
AT1G77120	AT1G79280	AT3G61520	AT3G52960	AT2G35010
AT1G77470	AT1G79340	AT3G61530	AT3G53020	AT2G35040
AT1G77550	AT1G79470	AT3G62790	AT3G53460	AT2G35120
AT1G77590	AT1G79650	AT3G62810	AT3G53580	AT2G35240
AT1G77670	AT1G79690	AT3G63150	AT3G53870	AT2G35490
AT1G77710	AT1G79730	AT3G63410	AT3G53990	AT2G35605
AT1G77750	AT1G79830	AT3G63490	AT3G54150	AT2G35720
AT1G78300	AT1G80070	AT3G63520	AT3G54440	AT2G35795
AT1G78380	AT1G80460	AT4G00570	AT3G54470	AT2G35900
AT1G78570	AT2G01190	AT4G00585	AT3G54640	AT2G36070
AT1G78850	AT2G01650	AT4G00860	AT3G55010	AT2G36250
AT1G78870	AT2G01690	AT4G01100	AT3G55410	AT2G36460
AT1G78900	AT2G02390	AT4G01660	AT3G55440	AT2G36530
AT1G79010	AT2G02470	AT4G01690	AT3G56070	AT2G36580
AT1G79230	AT2G02760	AT4G01990	AT3G56090	AT2G36880
AT1G79340	AT2G02790	AT4G02510	AT3G56130	AT2G37020
AT1G79390	AT2G03270	AT4G02580	AT3G56460	AT2G37220
AT1G79440	AT2G03430	AT4G02820	AT3G56490	AT2G37230
AT1G79500	AT2G03640	AT4G03240	AT3G57050	AT2G37270
AT1G79530	AT2G03870	AT4G04180	AT3G57090	AT2G37410
AT1G79550	AT2G04520	AT4G04770	AT3G57150	AT2G37660
AT1G79690	AT2G04650	AT4G05020	AT3G57290	AT2G37690
AT1G79750	AT2G05830	AT4G05160	AT3G57560	AT2G37860
AT1G79830	AT2G05840	AT4G05400	AT3G57610	AT2G38040
AT1G79870	AT2G06990	AT4G05530	AT3G58140	AT2G38550
AT1G79920	AT2G07690	AT4G05590	AT3G58510	AT2G38660
AT1G79930	AT2G13540	AT4G08900	AT3G58570	AT2G38670
AT1G79990	AT2G14740	AT4G09730	AT3G58610	AT2G39080
AT1G80070	AT2G15430	AT4G09750	AT3G58730	AT2G39270
AT1G80230	AT2G15790	AT4G10750	AT3G58750	AT3G55280
AT1G80270	AT2G16430	AT4G11060	AT3G59020	AT2G39730
AT1G80410	AT2G16440	AT4G11120	AT3G59890	AT2G39795
AT1G80480	AT2G17200	AT4G11160	AT3G60190	AT2G39970
AT1G80560	AT2G17290	AT4G12060	AT3G60240	AT2G40490
AT1G80600	AT2G17340	AT4G12130	AT3G60600	AT2G40765
AT1G80620	AT2G17380	AT4G12340	AT3G60750	AT2G41040
AT1G80720	AT2G17510	AT4G14070	AT3G60770	AT2G41220
AT2G01140	AT2G17560	AT4G14430	AT3G61540	AT2G41380
AT2G01250	AT2G17870	AT4G15640	AT3G61820	AT2G41790
AT2G01350	AT2G18230	AT4G15940	AT3G62030	AT2G41840
AT2G01720	AT2G18510	AT4G16210	AT3G62310	AT2G42210
AT2G01970	AT2G18700	AT4G16450	AT3G62360	AT2G42310
AT2G02050	AT2G18740	AT4G16800	AT3G62530	AT2G42490
AT2G02100	AT2G18790	AT4G17040	AT3G62870	AT2G42520
AT2G02500	AT2G18910	AT4G17085	AT3G63170	AT2G42590
AT2G02510	AT2G19520	AT4G17140	AT3G63190	AT2G42710
AT2G02560	AT2G19760	AT4G17300	AT3G63460	AT5G45775
AT2G02740	AT2G20330	AT4G17650	AT4G00620	AT2G42790
AT2G03510	AT2G20450	AT4G18440	AT4G05420	AT2G42910
AT2G03670	AT2G20630	AT4G19540	AT4G08950	AT2G43030
AT2G03690	AT2G21060	AT4G19710	AT4G09000	AT2G43090
AT2G03820	AT2G21130	AT4G20150	AT4G09320	AT2G43360
AT2G04030	AT2G21150	AT4G20930	AT4G10480	AT2G43400
AT2G04350	AT2G21270	AT4G21105	AT4G11010	AT2G43710
AT2G04400	AT2G21470	AT4G22000	AT4G11150	AT2G43750
AT2G04520	AT2G22240	AT4G22220	AT4G11260	AT2G43950
AT2G04540	AT2G22300	AT4G22240	AT4G11420	AT2G44050
AT2G04940	AT2G22400	AT4G22310	AT4G12420	AT2G44060
AT2G05710	AT2G22420	AT4G22930	AT4G12650	AT2G44065
AT2G05830	AT2G22570	AT4G23620	AT4G13010	AT2G44120
AT2G05840	AT2G24050	AT4G23885	AT4G13360	AT2G44350
AT2G05920	AT2G24390	AT4G25280	AT4G13430	AT2G44450
AT2G05990	AT2G24490	AT4G25370	AT4G13850	AT2G44525
AT2G06050	AT2G24940	AT4G26210	AT4G13930	AT2G44530
AT2G06850	AT2G25210	AT4G26410	AT4G13940	AT2G44610
AT2G06990	AT2G25280	AT4G26500	AT4G14160	AT2G44640
AT2G07050	AT2G25355	AT4G26620	AT4G14570	AT2G44650
AT2G07360	AT2G25800	AT4G26670	AT4G15000	AT2G45030
AT2G07690	AT2G25910	AT4G26780	AT4G16143	AT2G45060
AT2G07698	AT2G25970	AT4G26910	AT4G16155	AT2G45140
ATMG00210	AT2G26060	AT4G27585	AT4G16660	AT2G45290
AT2G09990	AT2G26590	AT4G28220	AT4G16760	AT2G45300
AT2G13540	AT2G26990	AT4G28360	AT4G17170	AT2G45440
AT2G13560	AT2G27040	AT4G28390	AT4G18100	AT2G45740
AT2G14120	AT2G27100	AT4G28510	AT4G18360	AT2G45960
AT2G14170	AT2G27150	AT4G29060	AT4G19880	AT2G45990
AT2G14260	AT2G27450	AT4G29130	AT5G44500	AT2G46110
AT2G14740	AT2G27600	AT4G29430	AT4G20830	AT2G46280
AT2G15570	AT2G27960	AT4G29480	AT4G21150	AT2G47380
AT2G15620	AT2G27970	AT4G30000	AT4G22710	AT2G47470
AT2G15690	AT2G28520	AT4G30010	AT4G23630	AT2G47510
AT2G16060	AT2G29440	AT4G30930	AT4G23650	AT2G47730
AT2G16430	AT2G29450	AT4G31210	AT4G23850	AT3G01120
AT2G16460	AT2G29540	AT4G31460	AT4G24190	AT3G01130
AT2G16485	AT2G29570	AT4G31810	AT4G24280	AT3G01280
AT2G16570	AT2G30050	AT4G32400	AT4G24620	AT3G01740
AT2G16600	AT2G30060	AT4G32470	AT4G24820	AT3G01790
AT2G16640	AT2G30140	AT4G32605	AT4G25100	AT3G01800
AT2G16780	AT2G30410	AT4G33010	AT4G26110	AT3G01910
AT2G16930	AT2G30620	AT4G33520	AT4G26300	AT3G02080
AT2G17120	AT2G31370	AT4G33760	AT4G26630	AT3G02090
AT2G17130	AT2G31660	AT4G34030	AT4G26870	AT3G02230
AT2G17265	AT2G33120	AT4G34310	AT4G26900	AT3G02360
AT2G17290	AT2G33340	AT4G34700	AT4G27070	AT3G02530
AT2G17360	AT2G33410	AT4G35460	AT4G27440	AT3G02630
AT2G17380	AT2G33840	AT4G35490	AT4G29010	AT3G02650
AT2G17390	AT2G33845	AT4G35850	AT4G29120	AT3G02660
AT2G17420	AT2G34260	AT4G36400	AT4G30190	AT3G02780
AT2G17630	AT2G34690	AT4G36420	AT4G30920	AT3G03060
AT2G17670	AT2G35630	AT4G36680	AT4G31480	AT3G03100
AT2G17840	AT2G36060	AT4G37000	AT4G31700	AT3G03590
AT2G17980	AT2G37770	AT4G37660	AT4G31990	AT3G03600
AT2G18020	AT2G37790	AT4G37830	AT4G33070	AT3G03780
AT2G18110	AT2G38610	AT4G37930	AT4G33510	AT3G03960
AT2G18330	AT2G38680	AT4G38150	AT4G33680	AT3G04120
AT2G18520	AT2G38700	AT4G38460	AT4G34110	AT3G04790
AT2G18960	AT2G38710	AT4G39460	AT4G34180	AT3G04840
AT2G19080	AT2G38720	AT4G39660	AT4G34230	AT3G04950
AT2G19480	AT2G39020	AT4G39690	AT4G34450	AT3G05020
AT2G19490	AT2G39050	AT4G39740	AT4G34740	AT3G05060
AT2G19520	AT2G39260	AT4G39850	AT4G34870	AT3G05970
AT2G19680	AT2G39770	AT4G39880	AT4G35000	AT3G06040
AT2G19730	AT2G40380	AT5G01220	AT4G35260	AT3G06050
AT2G19860	AT2G40550	AT5G02050	AT4G35830	AT3G06350
AT2G19940	AT2G40730	AT5G02740	AT4G35860	AT3G06483
AT2G20060	AT2G40840	AT5G04130	AT4G37870	AT3G06650
AT2G20270	AT2G41430	AT5G04830	AT4G37910	AT3G06790
AT2G20360	AT2G41740	AT5G05000	AT4G38220	AT3G06810
AT2G20420	AT2G41800	AT5G05370	AT4G39080	AT3G06850
AT2G20450	AT2G42230	AT5G05520	AT4G39230	AT3G06860
AT2G20530	AT2G42570	AT5G05730	AT4G39730	AT3G07060
AT2G20580	AT2G42600	AT5G05990	AT4G39980	AT3G07110
AT2G20690	AT2G42690	AT5G06210	AT5G02500	AT3G07480
AT2G20760	AT2G43770	AT5G06410	AT5G02870	AT3G07630
AT2G20800	AT2G43790	AT5G06580	AT5G03290	AT3G07770
AT2G20860	AT2G43910	AT5G08040	AT5G03630	AT3G08530
AT2G20890	AT2G43980	AT5G08060	AT5G03740	AT3G08580
AT2G20940	AT2G44160	AT5G08280	AT5G04590	AT3G08950
AT2G20990	AT2G45000	AT5G08530	AT5G05010	AT3G09200
AT2G21160	AT2G45330	AT5G08540	AT5G07350	AT3G09440
AT2G21170	AT2G45470	AT5G08610	AT5G07440	AT3G09630
AT2G21250	AT2G45540	AT5G09420	AT5G08300	AT3G09810
AT2G21330	AT2G45630	AT5G09770	AT5G08570	AT3G09820
AT2G21390	AT2G45730	AT5G09840	AT5G09650	AT3G09840
AT2G21580	AT2G45790	AT5G10730	AT5G09810	AT3G10050
AT2G21620	AT2G46520	AT5G11770	AT5G09900	AT3G10370
AT2G21660	AT2G46890	AT5G12100	AT5G10360	AT3G10670
AT2G21870	AT2G47110	AT5G12290	AT5G10860	AT3G10690
AT2G22125	AT2G47170	AT5G12470	AT5G10920	AT5G05370
AT2G22230	AT2G47680	AT5G13430	AT5G11200	AT3G10920
AT2G22250	AT2G47960	AT5G13610	AT5G11880	AT3G11070
AT2G22450	AT2G47970	AT5G13650	AT5G12040	AT3G11630
AT2G22480	AT3G01340	AT5G14105	AT5G13030	AT3G11940
AT2G22500	AT3G01520	AT5G14220	AT5G13050	AT3G12260
AT2G22780	AT3G02040	AT5G14580	AT5G13110	AT3G12370
AT2G23350	AT3G02260	AT5G14780	AT5G13120	AT3G12490
AT2G23370	AT3G02540	AT5G15320	AT5G13280	AT3G12780
AT2G23820	AT3G02560	AT5G15640	AT5G13420	AT3G12800
AT2G24020	AT3G02760	AT5G15700	AT5G13450	AT3G13150
AT2G24200	AT3G02770	AT5G15910	AT5G13490	AT3G13160
AT2G25080	AT3G02920	AT5G15980	AT5G13710	AT3G13470
AT2G25140	AT3G03380	AT5G16660	AT5G14040	AT3G13490
AT2G25570	AT3G03980	AT5G16930	AT5G14060	AT3G13860
AT2G25800	AT3G04230	AT5G16950	AT5G14170	AT3G13920
AT2G25830	AT3G04520	AT5G17770	AT5G14590	AT3G13930
AT2G25840	AT3G04600	AT5G18800	AT2G36160	AT3G14150
AT2G26080	AT3G04610	AT5G19620	AT2G37220	AT3G14390
AT2G26140	AT3G04710	AT5G20040	AT2G37760	AT3G14990
AT2G26230	AT3G04780	AT5G20090	AT2G41790	AT3G15000
AT2G27020	AT3G04820	AT5G22140	AT2G42520	AT3G15010
AT2G27040	AT3G04880	AT5G22350	AT2G45290	AT3G15020
AT2G27150	AT3G05000	AT5G22510	AT2G47730	AT3G15090
AT2G27170	AT3G05420	AT5G23120	AT3G01280	AT3G15290
AT2G27600	AT3G05900	AT5G23200	AT3G02230	AT3G15360
AT2G27680	AT3G05910	AT5G23250	AT3G03780	AT3G15590
AT2G27710	AT3G06540	AT5G23300	AT3G06350	AT3G15640
AT2G27730	AT3G06580	AT5G24650	AT3G08030	AT3G15660
AT2G28000	AT3G06930	AT5G25450	AT3G09840	AT3G15730
AT2G28430	AT3G07050	AT5G25940	AT3G10050	AT3G16170
AT2G28520	AT3G07090	AT5G26030	AT3G10920	AT3G16640
AT2G29080	AT3G07170	AT5G26570	AT3G14990	AT3G16910
AT2G29530	AT3G07300	AT5G26742	AT3G15010	AT3G16950
AT2G29550	AT3G07410	AT5G26860	AT3G15020	AT3G17020
AT2G29560	AT3G07640	AT5G27395	AT3G15980	AT3G17240
AT2G29570	AT3G07660	AT5G27540	AT3G16640	AT3G17300
AT2G29630	AT3G07720	AT5G27600	AT3G16830	AT3G17390
AT2G29960	AT3G07750	AT5G27660	AT3G17020	AT3G17465
AT2G29990	AT3G07810	AT5G27760	AT3G20050	AT3G17810
AT2G30050	AT3G07880	AT5G27820	AT3G21140	AT3G17820
AT2G30060	AT3G08943	AT5G30510	AT3G22200	AT3G17910
AT2G30200	AT3G09300	AT5G37510	AT3G27240	AT3G17970
AT2G30490	AT3G09350	AT5G37530	AT3G27850	AT3G18190
AT2G30620	AT3G09500	AT5G39600	AT3G43300	AT3G18240
AT2G30720	AT3G09800	AT5G39840	AT3G44330	AT3G18410
AT2G30860	AT3G10220	AT5G40650	AT3G44750	AT3G18580
AT2G30870	AT3G10300	AT5G40770	AT3G46030	AT3G18760
AT2G30920	AT3G10380	AT5G40810	AT3G48170	AT3G18820
AT2G30950	AT3G10410	AT5G40930	AT3G48750	AT3G19170
AT2G30970	AT3G10850	AT5G41210	AT3G48870	AT3G19440
AT2G31060	AT3G11250	AT5G41685	AT3G49910	AT3G19740
AT2G31140	AT3G11270	AT5G41940	AT3G52990	AT3G19820
AT2G31240	AT3G11330	AT5G42150	AT3G56150	AT3G20000
AT2G31350	AT3G11400	AT5G42270	AT4G01900	AT3G20050
AT2G31390	AT3G11830	AT5G43280	AT4G02930	AT3G20330
AT2G31490	AT3G11910	AT5G43430	AT4G03520	AT3G20390
AT2G31610	AT3G12270	AT5G43970	AT4G08390	AT3G20970
AT2G31670	AT3G12290	AT5G44710	AT4G08790	AT3G21110
AT2G31725	AT3G12390	AT5G44730	AT4G11600	AT3G21140
AT2G31810	AT3G12580	AT5G44780	AT4G16720	AT3G21400
AT2G32060	AT3G12600	AT5G45170	AT4G18480	AT3G22200
AT2G32260	AT3G12760	AT5G46160	AT4G19210	AT3G22300
AT2G32520	AT3G13224	AT5G46180	AT4G20360	AT3G22310
AT2G32730	AT3G13235	AT5G46800	AT4G20850	AT3G22330
AT2G32920	AT3G13300	AT5G47320	AT4G20890	AT3G22370
AT2G33040	AT3G13460	AT5G47570	AT4G23100	AT3G22425
AT2G33150	AT3G13570	AT5G47890	AT4G24770	AT3G22845
AT2G33210	AT3G14100	AT5G48030	AT4G24830	AT3G22890
AT2G33220	AT3G14290	AT5G48970	AT4G25130	AT3G22960
AT2G33470	AT3G14310	AT5G49555	AT4G26970	AT3G23300
AT2G33590	AT3G14600	AT5G49840	AT4G27090	AT3G23400
AT2G33800	AT3G14790	AT5G50210	AT4G27450	AT3G23830
AT2G34040	AT3G14940	AT5G50250	AT5G53300	AT3G23940
AT2G34050	AT3G15180	AT5G50340	AT4G29840	AT3G23990
AT2G34480	AT3G15610	AT5G50370	AT4G30270	AT3G24170
AT2G34590	AT3G16080	AT5G51040	AT4G31340	AT3G24200
AT2G34630	AT3G16110	AT5G51050	AT4G32520	AT3G25120
AT2G35010	AT3G16520	AT5G51220	AT4G32640	AT3G25520
AT2G35040	AT3G16760	AT5G51740	AT4G33030	AT3G25780
AT2G35120	AT3G16850	AT5G52520	AT4G33650	AT3G25860
AT2G35240	AT3G16980	AT5G53070	AT4G34200	AT3G26760
AT2G35490	AT3G16990	AT5G53350	AT4G34350	AT3G26770
AT2G35605	AT3G17210	AT5G53650	AT4G35090	AT3G27080
AT2G35720	AT3G17770	AT5G54100	AT4G35630	AT3G27240
AT2G35795	AT3G17790	AT5G54580	AT4G38740	AT3G27280
AT2G35900	AT3G17880	AT5G55140	AT4G39260	AT3G27380
AT2G36070	AT3G17900	AT5G55200	AT5G02490	AT3G27550
AT2G36130	AT3G17940	AT5G55220	AT5G02530	AT3G27570
AT2G36160	AT3G18000	AT5G55610	AT5G04740	AT3G27740
AT2G36250	AT3G18035	AT5G56500	AT5G06860	AT3G27820
AT2G36460	AT3G18060	AT5G56940	AT5G09590	AT3G27850
AT2G36530	AT3G18130	AT5G57300	AT5G10450	AT3G27890
AT2G36580	AT3G18165	AT5G57490	AT5G11520	AT3G27930
AT2G36880	AT3G18740	AT5G57590	AT5G12370	AT3G28700
AT2G37020	AT3G18790	AT5G58005	AT5G14030	AT3G28710
AT2G37220	AT3G18940	AT5G58370	AT5G14260	AT3G29320
AT2G37230	AT3G19130	AT5G60590	AT5G15090	AT3G30775
AT2G37270	AT3G19400	AT5G60730	AT5G15200	AT3G42050
AT2G37410	AT3G19420	AT5G60960	AT5G15450	AT3G43190
AT2G37550	AT3G19760	AT5G61030	AT5G15490	AT3G44110
AT2G37660	AT3G20790	AT5G61220	AT5G16050	AT3G44310
AT2G37690	AT3G22480	AT5G61810	AT5G16130	AT3G45300
AT2G37760	AT3G22590	AT5G62270	AT5G16290	AT3G45740
AT2G37770	AT3G22630	AT5G62530	AT5G16390	AT3G45770
AT2G37860	AT3G22980	AT5G62810	AT5G16710	AT3G45970
AT2G38040	AT3G23325	AT5G63310	AT5G16840	AT3G46560
AT2G38550	AT3G23600	AT5G63400	AT5G16970	AT3G46740
AT2G38660	AT3G23660	AT5G63510	AT5G17020	AT3G47520
AT2G38670	AT3G23810	AT5G63570	AT5G17330	AT3G47630
AT2G38680	AT3G25150	AT5G63620	AT5G17530	AT3G47833
AT2G38960	AT3G25545	AT5G64050	AT5G17560	AT3G47930
AT2G39050	AT3G26340	AT5G64400	AT5G17710	AT3G48000
AT2G39080	AT3G26380	AT5G65110	AT5G17920	AT3G48110
AT2G39270	AT3G26400	AT5G65560	AT5G18170	AT3G48140
AT2G39390	AT3G26420	AT5G65750	AT5G18380	AT3G48170
AT3G55280	AT3G26720	AT5G65940	AT5G19370	AT3G48540
AT2G39700	AT3G27190	AT5G66090	AT5G19510	AT3G48560
AT2G39730	AT3G27300	AT5G66510	AT5G19550	AT3G48680
AT2G39770	AT3G27430	AT5G66720	AT5G19760	AT3G48730
AT2G39795	AT3G27530	AT5G66760	AT5G20010	AT3G48870
AT2G39970	AT3G28730	AT5G66860	AT5G20080	AT3G48930
AT2G39990	AT3G28930	AT5G67590	AT5G20290	AT3G49010
AT2G40290	AT3G28940	ATMG00070	AT5G20720	AT3G49080
AT2G40300	AT3G28950	ATMG00090	AT5G20830	AT3G49240
AT2G40490	AT3G29350	ATMG00160	AT5G20890	AT3G49560
AT2G40590	AT3G42790	ATMG00210	AT5G21160	AT3G49680
AT2G40600	AT3G43600	ATMG00510	AT5G22060	AT3G49720
AT2G40730	AT3G44620	ATMG00640	AT5G22650	AT3G49725
AT2G40765	AT3G46000	AT1G05730	AT5G22880	AT3G49910
AT2G41040	AT3G46460	AT1G15730	AT5G23140	AT3G50930
AT2G41220	AT3G46970	AT1G20480	AT5G23540	AT3G51010
AT2G41380	AT3G47000	AT1G33810	AT5G24300	AT3G51100
AT2G41480	AT3G47590	AT1G55480	AT5G24400	AT3G51260
AT2G41530	AT3G48530	AT1G68010	AT5G25100	AT3G51800
AT2G41740	AT3G48670	AT1G70580	AT5G26360	AT3G51830
AT2G41790	AT3G48690	AT1G71500	AT5G26710	AT3G51840
AT2G41840	AT3G48710	AT2G02990	AT5G26780	AT3G52150
AT2G42210	AT3G49470	AT2G03390	AT5G26830	AT3G52200
AT2G42310	AT3G49600	AT2G04280	AT5G27380	AT3G52300
AT2G42490	AT3G50000	AT2G26300	AT5G28540	AT3G52380
AT2G42520	AT3G50210	AT2G30950	AT5G28840	AT3G52570
AT2G42570	AT3G50520	AT2G35500	AT5G35360	AT3G52730
AT2G42590	AT3G50590	AT2G39900	AT5G35430	AT3G52880
AT2G42600	AT3G51250	AT2G40300	AT5G36210	AT3G52930
AT2G42710	AT3G51310	AT3G09740	AT5G36230	AT3G52950
AT5G45775	AT3G51780	AT3G14415	AT5G36880	AT3G52960
AT2G42790	AT3G52190	AT3G26060	AT5G38480	AT3G52990
AT2G42910	AT3G52580	AT3G53560	AT5G39410	AT3G53020
AT2G43030	AT3G52630	AT3G54050	AT5G40490	AT3G53460
AT2G43090	AT3G52660	AT3G60210	AT5G40760	AT3G53580
AT2G43360	AT3G53180	AT4G16566	AT5G41670	AT3G53900
AT2G43400	AT3G53520	AT4G18810	AT5G41970	AT3G53990
AT2G43710	AT3G53620	AT4G19640	AT5G42020	AT3G54110
AT2G43750	AT3G53880	AT4G20430	AT5G42080	AT3G54470
AT2G43950	AT3G53970	AT4G32260	AT5G42960	AT3G54640
AT2G44050	AT3G54180	AT4G34460	AT5G42980	AT3G54660
AT2G44060	AT3G54360	AT5G10330	AT5G43780	AT3G55010
AT2G44065	AT3G54540	AT5G14910	AT5G43940	AT3G55400
AT2G44100	AT3G55020	AT5G18660	AT5G44070	AT3G55410
AT2G44120	AT3G55220	AT5G23050	AT5G44340	AT3G55440
AT2G44160	AT3G55260	AT5G49820	AT5G45390	AT3G55605
AT2G44350	AT3G55460	AT5G49940	AT5G46070	AT3G55760
AT2G44450	AT3G55610	AT5G57890	AT5G46290	AT3G56070
AT2G44525	AT3G55620	AT5G63380	AT5G47010	AT3G56090
AT2G44530	AT3G56190	ATCG00130	AT5G47030	AT3G56130
AT2G44610	AT3G56240		AT5G47770	AT3G56430
AT2G44620	AT3G56310		AT5G48230	AT3G56460
AT2G44640	AT3G57410		AT5G48960	AT3G56490
AT2G44650	AT3G57660		AT5G49910	AT3G56940
AT2G45030	AT3G58110		AT5G49970	AT3G57050
AT2G45060	AT3G58180		AT5G50810	AT3G57150
AT2G45140	AT3G58500		AT5G50850	AT3G57280
AT2G45290	AT3G59380		AT5G50920	AT3G57290
AT2G45300	AT3G59970		AT5G51430	AT3G57560
AT2G45330	AT3G59990		AT5G51570	AT3G57610
AT2G45440	AT3G60440		AT5G51660	AT3G58140
AT2G45540	AT3G60450		AT5G51820	AT3G58510
AT2G45740	AT3G60740		AT5G52240	AT3G58570
AT2G45960	AT3G60820		AT5G52470	AT3G58610
AT2G45990	AT3G60830		AT5G52840	AT3G58730
AT2G46110	AT3G60860		AT5G52920	AT3G58750
AT2G46280	AT3G61140		AT5G53460	AT3G58840
AT2G46540	AT3G61220		AT5G53480	AT3G59280
AT2G47110	AT3G61240		AT5G53560	AT3G59650
AT2G47380	AT3G61650		AT5G53850	AT3G59760
AT2G47390	AT3G61760		AT5G54310	AT3G59820
AT2G47470	AT3G61860		AT5G54500	AT3G59890
AT2G47510	AT3G62010		AT5G54810	AT3G60190
AT2G47730	AT3G62290		AT5G55070	AT3G60510
AT3G01120	AT3G62370		AT5G55280	AT3G60600
AT3G01130	AT3G62840		AT5G55480	AT3G60750
AT3G01280	AT3G62940		AT5G56000	AT3G60770
AT3G01390	AT3G63000		AT5G56030	AT3G61070
AT3G01740	AT3G63250		AT5G57110	AT3G61440
AT3G01790	AT3G66654		AT5G57655	AT3G61520
AT3G01800	AT4G00810		AT5G57850	AT3G61530
AT3G01910	AT4G00830		AT5G57870	AT3G62030
AT3G02080	AT4G01070		AT5G58060	AT3G62360
AT3G02090	AT4G01370		AT5G58070	AT3G62530
AT3G02200	AT4G01400		AT5G58220	AT3G62790
AT3G02230	AT4G02060		AT5G58240	AT3G62810
AT3G02360	AT4G02150		AT5G58330	AT3G63150
AT3G02520	AT4G02230		AT5G58490	AT3G63170
AT3G02530	AT4G02480		AT5G58710	AT3G63190
AT3G02630	AT4G02570		AT5G59440	AT3G63410
AT3G02650	AT4G02610		AT5G59840	AT3G63460
AT3G02660	AT4G02720		AT5G59880	AT3G63490
AT3G02760	AT4G02840		AT5G60600	AT3G63520
AT3G02780	AT4G02860		AT5G60640	AT4G00570
AT3G03060	AT4G03080		AT5G61510	AT4G00585
AT3G03070	AT4G04040		AT5G61780	AT4G00620
AT3G03100	AT4G04950		AT5G61790	AT4G00860
AT3G03250	AT4G09520		AT5G62390	AT4G01100
AT3G03590	AT4G09670		AT5G63840	AT4G01660
AT3G03600	AT4G10050		AT5G63890	AT4G01690
AT3G03780	AT4G10320		AT5G63980	AT4G01900
AT3G03920	AT4G11330		AT5G64120	AT4G01990
AT3G03960	AT4G11740		AT5G64370	AT4G02510
AT3G03980	AT4G11820		AT5G64460	AT4G02580
AT3G04120	AT4G12390		AT5G65020	AT4G02820
AT3G04600	AT4G12910		AT5G65620	AT4G02930
AT3G04790	AT4G13720		AT5G65720	AT4G03240
AT3G04840	AT4G14110		AT5G66120	AT4G03520
AT3G04950	AT4G14710		AT5G66680	AT4G04180
AT3G05020	AT4G14800		AT5G66920	AT4G04770
AT3G05060	AT4G14930		AT5G67500	AT4G05020
AT3G05420	AT4G15210		ATCG00120	AT4G05160
AT3G05530	AT4G15410		ATCG00480	AT4G05400
AT3G05560	AT4G15790		ATCG00490	AT4G05530
AT3G05590	AT4G15900		ATCG00500	AT4G05590
AT3G05900	AT4G17100		ATCG00670	AT4G08390
AT3G05970	AT4G17190		AT1G01050	AT4G08900
AT3G06040	AT4G17260		AT1G01100	AT4G09000
AT3G06050	AT4G17510		AT1G01300	AT4G09320
AT3G06350	AT4G17520		AT1G01910	AT4G09730
AT3G06483	AT4G17720		AT1G01940	AT4G09750
AT3G06650	AT4G17830		AT1G01960	AT4G10750
AT3G06720	AT4G17890		AT1G02080	AT4G11010
AT3G06790	AT4G18905		AT1G02130	AT4G11060
AT3G06810	AT4G18930		AT1G02140	AT4G11120
AT3G06850	AT4G18950		AT1G02305	AT4G11150
AT3G06860	AT4G19003		AT1G02690	AT4G11160
AT3G07060	AT4G19006		AT1G02840	AT4G11420
AT3G07100	AT4G21580		AT1G03110	AT4G11600
AT3G07110	AT4G21710		AT1G03330	AT4G12060
AT3G07300	AT4G22010		AT1G03350	AT4G12130
AT3G07410	AT4G22530		AT1G04080	AT4G12340
AT3G07480	AT4G22570		AT1G04170	AT4G12420
AT3G07630	AT4G22720		AT1G04410	AT4G13010
AT3G07720	AT4G24220		AT1G04810	AT4G13360
AT3G07770	AT4G24270		AT1G50010	AT4G13430
AT3G07810	AT4G24550		AT1G04850	AT4G13850
AT3G08030	AT4G24800		AT1G04870	AT4G13930
AT3G08510	AT4G24840		AT1G05010	AT4G13940
AT3G08530	AT4G25340		AT1G05350	AT4G14070
AT3G08580	AT4G25530		AT1G05620	AT4G14430
AT3G08590	AT4G26650		AT1G06210	AT4G15000
AT3G08950	AT4G26750		AT1G06220	AT4G15640
AT3G09200	AT4G26840		AT1G06400	AT4G15940
AT3G09440	AT4G27000		AT1G06410	AT4G16155
AT3G09630	AT4G27320		AT1G06570	AT4G16210
AT3G09740	AT4G27490		AT1G06760	AT4G16450
AT3G09810	AT4G27500		AT1G06900	AT4G16720
AT3G09820	AT4G27640		AT1G07140	AT4G16760
AT3G09840	AT4G28470		AT1G07370	AT4G16800
AT3G10050	AT4G29160		AT5G59970	AT4G17040
AT3G10300	AT4G29260		AT1G07750	AT4G17085
AT3G10370	AT4G29350		AT5G59850	AT4G17140
AT3G10380	AT4G29490		AT5G60390	AT4G17170
AT3G10410	AT4G29510		AT1G07990	AT4G17300
AT3G10670	AT4G29680		AT1G08370	AT4G17650
AT3G10690	AT4G29810		AT1G08420	AT4G18100
AT3G10850	AT4G29830		AT1G08780	AT4G18360
AT5G05370	AT4G30160		AT1G08880	AT4G18440
AT3G10920	AT4G30260		AT1G08980	AT4G18480
AT3G11070	AT4G30480		AT1G09010	AT4G19540
AT3G11130	AT4G30890		AT1G09150	AT4G19710
AT3G11400	AT4G31120		AT1G09210	AT4G19880
AT3G11510	AT4G31180		AT1G09270	AT4G20150
AT3G11630	AT4G31490		AT1G09490	AT4G20360
AT3G11710	AT4G31580		AT1G57860	AT4G20830
AT3G11830	AT4G31790		AT1G09760	AT4G20890
AT3G11910	AT4G31840		AT1G09770	AT4G20930
AT3G11940	AT4G32180		AT1G09780	AT4G21105
AT3G12110	AT4G32285		AT1G09870	AT4G21150
AT3G12260	AT4G32720		AT1G10200	AT4G22000
AT3G12370	AT4G32760		AT1G10290	AT4G22220
AT3G12390	AT4G32840		AT1G10590	AT4G22240
AT3G12490	AT4G32930		AT2G47170	AT4G22310
AT3G12500	AT4G33090		AT1G10670	AT4G22710
AT3G12580	AT4G33250		AT1G10840	AT4G22930
AT3G12780	AT4G33400		AT1G10940	AT4G23100
AT3G12800	AT4G33670		AT1G11260	AT4G23620
AT3G13060	AT4G33945		AT1G11360	AT4G23850
AT3G13150	AT4G34050		AT1G11650	AT4G23885
AT3G13160	AT4G34215		AT1G11660	AT4G24190
AT3G13224	AT4G34270		AT1G11890	AT4G24280
AT3G13460	AT4G34660		AT1G12270	AT4G24620
AT3G13470	AT4G34890		AT1G12310	AT4G24770
AT3G13490	AT4G34920		AT1G12900	AT4G24830
AT3G13860	AT4G35300		AT1G12920	AT4G25100
AT3G13920	AT4G35360		AT1G13020	AT4G25130
AT3G13930	AT4G35450		AT1G13060	AT4G25280
AT3G14150	AT4G35800		AT1G13690	AT4G25370
AT3G14290	AT4G35890		AT1G13950	AT4G26110
AT3G14310	AT4G36020		AT1G14710	AT4G26210
AT3G14390	AT4G36195		AT1G15000	AT4G26300
AT3G14940	AT4G36350		AT1G15130	AT4G26410
AT3G14990	AT4G36760		AT1G15230	AT4G26500
AT3G15000	AT4G36940		AT1G15280	AT4G26620
AT3G15010	AT4G37190		AT1G15340	AT4G26670
AT3G15020	AT4G37210		AT1G15790	AT4G26780
AT3G15090	AT4G38400		AT1G15910	AT4G26900
AT3G15290	AT4G38510		AT1G15930	AT4G26910
AT3G15360	AT4G38630		AT1G16350	AT4G26970
AT3G15590	AT4G38800		AT1G16520	AT4G27070
AT3G15610	AT4G38890		AT1G16890	AT4G27090
AT3G15640	AT4G38930		AT1G17710	AT4G27440
AT3G15660	AT4G39150		AT1G17880	AT4G27585
AT3G15730	AT4G39280		AT1G17890	AT4G28220
AT3G15980	AT4G39520		AT1G18070	AT4G28360
AT3G16170	AT4G39800		AT1G18210	AT4G28390
AT3G16640	AT5G02240		AT1G18450	AT4G28510
AT3G16780	AT5G03300		AT1G19130	AT4G29010
AT3G16830	AT5G03540		AT1G19570	AT4G29060
AT3G16910	AT5G04280		AT1G19880	AT4G29120
AT3G16950	AT5G04430		AT1G20020	AT4G29130
AT3G17020	AT5G05340		AT1G20110	AT4G29430
AT3G17240	AT5G05980		AT1G20225	AT4G29480
AT3G17300	AT5G06060		AT1G20260	AT4G29840
AT3G17390	AT5G06110		AT1G20340	AT4G30000
AT3G17465	AT5G06140		AT1G20370	AT4G30010
AT3G17810	AT5G06460		AT1G20450	AT4G30190
AT3G17820	AT5G06600		AT1G20580	AT4G30270
AT3G17880	AT5G06730		AT1G20693	AT4G30920
AT3G17910	AT5G07370		AT1G20950	AT4G30930
AT3G17970	AT5G08100		AT1G20960	AT4G31210
AT3G18035	AT5G08160		AT1G21380	AT4G31460
AT3G18060	AT5G08450		AT1G21630	AT4G31480
AT3G18130	AT5G09390		AT1G21680	AT4G31810
AT3G18190	AT5G09620		AT1G21690	AT4G31990
AT3G18240	AT5G09830		AT1G21720	AT4G32400
AT3G18410	AT5G10240		AT1G22270	AT4G32470
AT3G18580	AT5G10540		AT1G22920	AT4G32520
AT3G18760	AT5G10560		AT1G23190	AT4G32605
AT3G18820	AT5G10870		AT1G23290	AT4G33010
AT3G18860	AT5G10980		AT1G70490	AT4G33030
AT3G19170	AT5G11040		AT1G23820	AT4G33070
AT3G19440	AT5G11110		AT1G24050	AT4G33510
AT3G19740	AT5G11500		AT1G25211	AT4G33520
AT3G19760	AT5G11580		AT1G25350	AT4G33680
AT3G19820	AT5G11710		AT1G25490	AT4G33760
AT3G20000	AT5G11720		AT1G26570	AT4G34030
AT3G20050	AT5G11810		AT1G27090	AT4G34110
AT3G20330	AT5G11850		AT1G27130	AT4G34200
AT3G20390	AT5G11900		AT1G27310	AT4G34230
AT3G20630	AT5G11950		AT1G27400	AT4G34310
AT3G20970	AT5G12110		AT5G42820	AT4G34350
AT3G21110	AT5G12410		AT1G27970	AT4G34450
AT3G21140	AT5G13200		AT1G28120	AT4G34700
AT3G21400	AT5G13370		AT1G28200	AT4G34740
AT3G22110	AT5G13520		AT1G28350	AT4G34870
AT3G22200	AT5G13530		AT1G29250	AT4G35000
AT3G22300	AT5G13560		AT1G29350	AT4G35090
AT3G22310	AT5G13680		AT1G29850	AT4G35260
AT3G22330	AT5G13780		AT1G29990	AT4G35460
AT3G22370	AT5G14250		AT1G30070	AT4G35490
AT3G22425	AT5G14450		AT1G30230	AT4G35630
AT3G22630	AT5G14520		AT1G30470	AT4G35830
AT3G22845	AT5G14540		AT1G30580	AT4G35850
AT3G22850	AT5G14600		AT1G30630	AT4G35860
AT3G22890	AT5G14790		AT1G30690	AT4G36400
AT3G22960	AT5G14800		AT1G31070	AT4G36420
AT3G23300	AT5G15270		AT1G31340	AT4G36680
AT3G23400	AT5G15400		AT1G31730	AT4G37000
AT3G23810	AT5G15810		AT1G31812	AT4G37660
AT3G23830	AT5G16260		AT1G32050	AT4G37830
AT3G23940	AT5G16280		AT1G32490	AT4G37870
AT3G23990	AT5G16440		AT1G35140	AT4G37910
AT3G24170	AT5G16450		AT1G35580	AT4G37930
AT3G24200	AT5G16760		AT1G35720	AT4G38150
AT3G25120	AT5G16990		AT1G35780	AT4G38220
AT3G25520	AT5G17000		AT1G36310	AT4G38460
AT3G25530	AT5G18070		AT1G36730	AT4G38740
AT3G25780	AT5G18200		AT1G43670	AT4G39080
AT3G25800	AT5G18230		AT1G43690	AT4G39260
AT3G25860	AT5G18400		AT1G43700	AT4G39460
AT3G26340	AT5G18420		AT1G43710	AT4G39660
AT3G26760	AT5G19150		AT1G44790	AT4G39690
AT3G26770	AT5G19180		AT1G44820	AT4G39740
AT3G27080	AT5G19320		AT1G44835	AT4G39850
AT3G27240	AT5G19485		AT1G44900	AT4G39880
AT3G27280	AT5G19680		AT1G44910	AT4G39980
AT3G27300	AT5G19990		AT1G45000	AT5G01220
AT3G27380	AT5G20400		AT1G47200	AT5G02050
AT3G27550	AT5G20570		AT1G47550	AT5G02490
AT3G27570	AT5G20950		AT1G47710	AT5G02500
AT3G27740	AT5G20990		AT1G48160	AT5G02530
AT3G27820	AT5G21060		AT1G48410	AT5G02740
AT3G27850	AT5G21105		AT1G48610	AT5G02870
AT3G27890	AT5G21274		AT1G48900	AT5G03290
AT3G27930	AT5G21326		AT1G49340	AT5G03630
AT3G28700	AT5G22010		AT1G49600	AT5G04130
AT3G28710	AT5G22030		AT1G49660	AT5G04590
AT3G28730	AT5G22080		AT1G49820	AT5G04740
AT3G29320	AT5G22120		AT1G50110	AT5G04830
AT3G29360	AT5G22320		AT1G50370	AT5G05000
AT3G30775	AT5G22460		AT1G50480	AT5G05520
AT3G42050	AT5G22480		AT1G50500	AT5G05730
AT3G42170	AT5G22780		AT1G50570	AT5G05990
AT3G42790	AT5G22950		AT1G50670	AT5G06210
AT3G43190	AT5G23400		AT1G51360	AT5G06410
AT3G43300	AT5G23570		AT1G51510	AT5G06580
AT3G44110	AT5G23860		AT1G51590	AT5G06860
AT3G44300	AT5G23900		AT1G51690	AT5G07440
AT3G44310	AT5G24750		AT1G51760	AT5G08040
AT3G44330	AT5G24760		AT1G52260	AT5G08060
AT3G44340	AT5G24840		AT1G52340	AT5G08280
AT3G44750	AT5G25070		AT1G52360	AT5G08300
AT3G45300	AT5G25757		AT1G52380	AT5G08530
AT3G45740	AT5G25780		AT1G52570	AT5G08540
AT3G45770	AT5G26210		AT1G53310	AT5G08610
AT3G45970	AT5G27450		AT1G53500	AT5G09420
AT3G46030	AT5G27700		AT1G53850	AT5G09590
AT3G46440	AT5G27740		AT1G55090	AT5G09650
AT3G46560	AT5G28050		AT1G55150	AT5G09770
AT3G46740	AT5G34850		AT1G55210	AT5G09810
AT3G46970	AT5G35620		AT1G55250	AT5G09840
AT3G47520	AT5G37475		AT1G55500	AT5G10360
AT3G47630	AT5G37720		AT1G56340	AT5G10450
AT3G47833	AT5G37830		AT1G56450	AT5G10730
AT3G47930	AT5G37850		AT1G58280	AT5G10860
AT3G48000	AT5G38830		AT1G59359	AT5G10920
AT3G48110	AT5G39320		AT1G59600	AT5G11520
AT3G48140	AT5G39720		AT1G59710	AT5G11770
AT3G48170	AT5G39730		AT1G59760	AT5G11880
AT3G48540	AT5G39740		AT1G59830	AT5G12040
AT3G48560	AT5G40870		AT1G59960	AT5G12100
AT3G48670	AT5G41770		AT1G60070	AT5G12290
AT3G48680	AT5G41950		AT1G60080	AT5G12470
AT3G48730	AT5G42820		AT1G60420	AT5G13030
AT3G48750	AT5G42970		AT1G60690	AT5G13050
AT3G48860	AT5G43010		AT1G60710	AT5G13110
AT3G48870	AT5G43060		AT1G60730	AT5G13120
AT3G48930	AT5G43900		AT1G60780	AT5G13280
AT3G48990	AT5G43960		AT1G60810	AT5G13420
AT3G49010	AT5G44090		AT1G61150	AT5G13430
AT3G49080	AT5G44170		AT1G61580	AT5G13450
AT3G49240	AT5G44320		AT1G62380	AT5G13490
AT3G49430	AT5G44635		AT1G62390	AT5G13610
AT3G49470	AT5G44720		AT1G62740	AT5G13650
AT3G49560	AT5G45620		AT1G62820	AT5G13710
AT3G49680	AT5G46020		AT1G63000	AT5G14030
AT3G49720	AT5G46280		AT1G63010	AT5G14040
AT3G49725	AT5G46630		AT1G63020	AT5G14060
AT3G49870	AT5G46750		AT1G63050	AT5G14105
AT3G49910	AT5G47760		AT1G63160	AT5G14220
AT3G50000	AT5G47880		AT1G63210	AT5G14260
AT3G50590	AT5G48180		AT1G63220	AT5G14580
AT3G50670	AT5G48480		AT1G63290	AT5G14590
AT3G50930	AT5G48760		AT1G63640	AT5G14780
AT3G51010	AT5G48870		AT1G64550	AT5G15090
AT3G51100	AT5G48930		AT1G64740	AT5G15200
AT3G51260	AT5G49020		AT1G64760	AT5G15320
AT3G51550	AT5G49460		AT1G64790	AT5G15450
AT3G51800	AT5G49510		AT1G65440	AT5G15640
AT3G51830	AT5G49650		AT1G65970	AT5G15700
AT3G51840	AT5G49720		AT1G66070	AT5G15910
AT3G52140	AT5G49830		AT1G66080	AT5G15980
AT3G52150	AT5G49880		AT1G66260	AT5G16050
AT3G52190	AT5G49930		AT1G66530	AT5G16130
AT3G52200	AT5G49980		AT1G66680	AT5G16290
AT3G52300	AT5G50680		AT1G67120	AT5G16390
AT3G52380	AT5G50870		AT1G67630	AT5G16660
AT3G52390	AT5G50960		AT1G67680	AT5G16710
AT3G52560	AT5G51280		AT1G67930	AT5G16840
AT3G52570	AT5G51550		AT1G68560	AT5G16930
AT3G52730	AT5G51590		AT1G68760	AT5G16950
AT3G52880	AT5G51700		AT1G68790	AT5G16970
AT3G52930	AT5G51840		AT1G69030	AT5G17330
AT3G52950	AT5G51970		AT1G69250	AT5G17530
AT3G52960	AT5G52040		AT1G69410	AT5G17560
AT3G52990	AT5G52200		AT1G69510	AT5G17710
AT3G53020	AT5G52310		AT1G69620	AT5G17770
AT3G53110	AT5G52560		AT1G69800	AT5G17920
AT3G53180	AT5G52640		AT1G70310	AT5G18170
AT3G53460	AT5G53000		AT1G70320	AT5G18380
AT3G53520	AT5G53120		AT1G70410	AT5G18800
AT3G53580	AT5G53530		AT1G70600	AT5G19370
AT3G53740	AT5G53620		AT1G70730	AT5G19510
AT3G53870	AT5G54440		AT1G70980	AT5G19550
AT3G53900	AT5G54510		AT1G71040	AT5G19620
AT3G53990	AT5G54750		AT1G71220	AT5G19760
AT3G54110	AT5G54960		AT1G71440	AT5G20010
AT3G54150	AT5G55130		AT1G71750	AT5G20040
AT3G54440	AT5G55160		AT1G71770	AT5G20080
AT3G54470	AT5G55530		AT1G71790	AT5G20090
AT3G54540	AT5G55660		AT1G71860	AT5G20290
AT3G54640	AT5G55940		AT1G71950	AT5G20720
AT3G54660	AT5G56280		AT1G72150	AT5G20830
AT3G55010	AT5G56630		AT1G72550	AT5G20890
AT3G55400	AT5G56740		AT1G72680	AT5G22060
AT3G55410	AT5G56760		AT1G72730	AT5G22140
AT3G55430	AT5G56950		AT1G73010	AT5G22350
AT3G55440	AT5G57020		AT1G73030	AT5G22510
AT3G55605	AT5G57330		AT1G73180	AT5G22650
AT3G55610	AT5G57410		AT1G73230	AT5G22880
AT3G55760	AT5G57440		AT1G73250	AT5G23120
AT3G56070	AT5G57950		AT1G74560	AT5G23140
AT3G56090	AT5G58230		AT1G74910	AT5G23200
AT3G56130	AT5G58440		AT1G74920	AT5G23250
AT3G56150	AT5G58450		AT1G75270	AT5G23300
AT3G56190	AT5G58590		AT1G75280	AT5G23540
AT3G56310	AT5G59140		AT1G75780	AT5G24300
AT3G56430	AT5G59160		AT1G75950	AT5G24400
AT3G56460	AT5G59420		AT1G75990	AT5G24650
AT3G56490	AT5G59890		AT1G76010	AT5G25100
AT3G56940	AT5G59950		AT1G76540	AT5G25450
AT3G57050	AT5G60160		AT1G76550	AT5G25940
AT3G57090	AT5G60360		AT1G76680	AT5G26030
AT3G57150	AT5G60540		AT1G76810	AT5G26360
AT3G57280	AT5G60790		AT1G76850	AT5G26570
AT3G57290	AT5G61500		AT1G76860	AT5G26710
AT3G57560	AT5G61970		AT1G77470	AT5G26742
AT3G57610	AT5G63220		AT1G77510	AT5G26780
AT3G58140	AT5G63860		AT1G77540	AT5G26830
AT3G58510	AT5G63990		AT1G77710	AT5G26860
AT3G58570	AT5G64130		AT1G77940	AT5G27380
AT3G58610	AT5G64140		AT1G78060	AT5G27395
AT3G58730	AT5G64250		AT1G78150	AT5G27540
AT3G58750	AT5G64260		AT1G78570	AT5G27600
AT3G58840	AT5G64270		AT1G78680	AT5G27660
AT3G59020	AT5G65010		AT1G78830	AT5G27760
AT3G59280	AT5G65270		AT1G78870	AT5G27820
AT3G59650	AT5G65760		AT1G79210	AT5G28540
AT3G59760	AT5G66040		AT1G79260	AT5G28840
AT3G59820	AT5G67100		AT1G79280	AT5G30510
AT3G59890	AT5G67510		AT1G79340	AT5G35360
AT3G59920	AT5G67630		AT1G79470	AT5G36210
AT3G60190			AT1G79500	AT5G36880
AT3G60240			AT1G79650	AT5G37510
AT3G60510			AT1G79690	AT5G37530
AT3G60600			AT1G79730	AT5G38480
AT3G60750			AT1G79830	AT5G39410
AT3G60770			AT1G79870	AT5G39600
AT3G60820			AT1G79920	AT5G39840
AT3G61070			AT1G79930	AT5G40490
AT3G61110			AT1G80070	AT5G40650
AT3G61440			AT1G80460	AT5G40770
AT3G61520			AT2G01190	AT5G40810
AT3G61530			AT2G01650	AT5G40930
AT3G61540			AT2G01690	AT5G41210
AT3G61760			AT2G02100	AT5G41670
AT3G61820			AT2G02390	AT5G41685
AT3G62030			AT2G02470	AT5G41940
AT3G62120			AT2G02560	AT5G41970
AT3G62310			AT2G02760	AT5G42020
AT3G62360			AT2G02790	AT5G42080
AT3G62370			AT2G03270	AT5G42150
AT3G62530			AT2G03430	AT5G42270
AT3G62790			AT2G03640	AT5G42960
AT3G62810			AT2G03680	AT5G42980
AT3G62830			AT2G03800	AT5G43280
AT3G62870			AT2G03870	AT5G43430
AT3G62920			AT2G04520	AT5G43780
AT3G62940			AT2G04650	AT5G43940
AT3G63000			AT2G05830	AT5G43970
AT3G63130			AT2G05840	AT5G44340
AT3G63150			AT3G16080	AT5G44710
AT3G63170			AT2G06990	AT5G44730
AT3G63190			AT2G07360	AT5G44780
AT3G63410			AT2G07690	AT5G45170
AT3G63460			AT2G13540	AT5G45390
AT3G63490			AT2G14260	AT5G46160
AT3G63520			AT2G14720	AT5G46180
AT3G66654			AT2G14740	AT5G46290
AT4G00570			AT2G15430	AT5G46800
AT4G00585			AT2G15790	AT5G47030
AT4G00620			AT2G15860	AT5G47320
AT4G00860			AT2G16430	AT5G47570
AT4G01070			AT2G16440	AT5G47890
AT4G01100			AT2G16950	AT5G48030
AT4G01400			AT2G17120	AT5G48960
AT4G01660			AT2G17190	AT5G48970
AT4G01690			AT2G17200	AT5G49555
AT4G01850			AT2G17280	AT5G49840
AT4G01900			AT2G17290	AT5G49910
AT4G01990			AT2G17340	AT5G49970
AT4G02080			AT2G17360	AT5G50210
AT4G02340			AT2G17380	AT5G50250
AT4G02450			AT2G17390	AT5G50340
AT4G02510			AT2G17510	AT5G50370
AT4G02580			AT2G17560	AT5G50810
AT4G02820			AT2G17870	AT5G50850
AT4G02840			AT2G17980	AT5G50920
AT4G02930			AT2G18040	AT5G51040
AT4G03240			AT2G18110	AT5G51050
AT4G03520			AT2G18230	AT5G51220
AT4G04040			AT2G18510	AT5G51570
AT4G04180			AT2G18700	AT5G51740
AT4G04770			AT2G18740	AT5G51820
AT4G04910			AT2G18790	AT5G52470
AT4G05020			AT2G18910	AT5G52520
AT4G05160			AT2G19520	AT5G52840
AT4G05400			AT5G56670	AT5G52920
AT4G05420			AT2G19760	AT5G53070
AT4G05530			AT2G20330	AT5G53350
AT4G05590			AT2G20450	AT5G53460
AT4G08280			AT2G20490	AT5G53480
AT4G08390			AT2G20630	AT5G53560
AT4G08790			AT2G20760	AT5G53650
AT4G08900			AT2G21060	AT5G54100
AT4G08950			AT2G21130	AT5G54500
AT4G09000			AT2G21150	AT5G54580
AT4G09320			AT2G21250	AT5G54810
AT4G09670			AT2G21270	AT5G55070
AT4G09730			AT2G21470	AT5G55140
AT4G09750			AT2G21580	AT5G55200
AT4G10320			AT2G22125	AT5G55220
AT4G10480			AT2G22240	AT5G55280
AT4G10750			AT2G22300	AT5G55480
AT4G11010			AT2G22400	AT5G55610
AT4G11060			AT2G22420	AT5G56030
AT4G11120			AT2G22475	AT5G56500
AT4G11150			AT2G22570	AT5G56940
AT4G11160			AT2G24050	AT5G57110
AT4G11260			AT2G24200	AT5G57300
AT4G11420			AT2G24390	AT5G57490
AT4G11600			AT2G24490	AT5G57590
AT5G11750			AT2G24940	AT5G57850
AT4G11820			AT2G25060	AT5G57870
AT4G12060			AT2G25210	AT5G58005
AT4G12130			AT2G25280	AT5G58070
AT4G12340			AT2G25355	AT5G58220
AT4G12420			AT2G25800	AT5G58240
AT4G12650			AT2G25910	AT5G58330
AT4G13010			AT2G25970	AT5G58370
AT4G13360			AT2G26060	AT5G58710
AT4G13430			AT2G26590	AT5G59840
AT4G13720			AT2G26670	AT5G59880
AT4G13780			AT2G26990	AT5G60590
AT4G13850			AT2G27040	AT5G60600
AT4G13930			AT2G27100	AT5G60640
AT4G13940			AT2G27150	AT5G60730
AT4G14030			AT2G27190	AT5G60960
AT4G14070			AT2G27450	AT5G61030
AT4G14160			AT2G27510	AT5G61220
AT4G14430			AT2G27530	AT5G61790
AT4G14570			AT2G27600	AT5G61810
AT4G14880			AT2G27710	AT5G62270
AT4G14930			AT2G27720	AT5G62390
AT4G15000			AT2G27860	AT5G62530
AT4G15640			AT2G27960	AT5G62810
AT4G15900			AT2G27970	AT5G63310
AT4G15940			AT2G28520	AT5G63400
AT4G16143			AT2G29440	AT5G63510
AT4G16155			AT2G29450	AT5G63570
AT4G16210			AT1G62810	AT5G63620
AT4G16450			AT2G29540	AT5G63840
AT4G16660			AT2G29570	AT5G63890
AT4G16720			AT2G29630	AT5G63980
AT4G16760			AT2G30050	AT5G64050
AT4G16800			AT2G30060	AT5G64120
AT4G17040			AT2G30110	AT5G64400
AT4G17085			AT2G30140	AT5G65110
AT4G17140			AT2G30410	AT5G65560
AT4G17170			AT2G30620	AT5G65620
AT4G17190			AT2G30930	AT5G65720
AT4G17300			AT2G31370	AT5G65750
AT4G17520			AT2G31660	AT5G65940
AT4G17650			AT2G32060	AT5G66090
AT4G17830			AT2G32260	AT5G66120
AT4G17890			AT2G32730	AT5G66510
AT4G18100			AT2G33120	AT5G66680
AT4G18360			AT2G33340	AT5G66720
AT4G18440			AT2G33410	AT5G66760
AT4G18480			AT1G22530	AT5G66860
AT4G18950			AT4G09800	AT5G66920
AT4G19006			AT2G33590	AT5G67500
AT4G19210			AT2G33840	AT5G67590
AT4G19540			AT2G33845	ATCG00120
AT4G19710			AT2G34260	ATCG00480
AT4G19880			AT2G34680	ATCG00490
AT4G20150			AT2G34690	ATCG00500
AT4G20260			AT2G36060	ATCG00670
AT4G20360			AT3G53750	ATMG00070
AT4G20410			AT2G37770	ATMG00090
AT5G44500			AT2G38610	ATMG00160
AT4G20830			AT2G38680	ATMG00510
AT4G20850			AT2G38700	ATMG00640
AT4G20890			AT2G38720	AT1G01050
AT4G20930			AT2G38740	AT1G01100
AT4G21090			AT2G38940	AT1G02130
AT4G21105			AT2G38960	AT1G04410
AT4G21150			AT2G39020	AT1G04710
AT4G21580			AT2G39050	AT1G50010
AT4G22000			AT2G39260	AT1G05730
AT4G22010			AT2G39390	AT1G07140
AT4G22220			AT2G39770	AT5G59970
AT4G22240			AT2G39990	AT1G07750
AT4G22310			AT2G40380	AT5G59850
AT4G22670			AT2G40590	AT5G60390
AT4G22710			AT2G40600	AT1G09210
AT4G22930			AT2G40660	AT1G57860
AT4G23100			AT2G40730	AT1G09780
AT4G23620			AT2G40840	AT1G09870
AT4G23630			AT2G41430	AT1G11260
AT4G23650			AT2G41480	AT1G12310
AT4G23850			AT2G41530	AT1G12900
AT4G23885			AT2G41740	AT1G15220
AT4G24190			AT2G41800	AT1G15730
AT4G24220			AT2G42570	AT1G16890
AT4G24280			AT2G42600	AT1G17880
AT4G24550			AT2G42680	AT1G20020
AT4G24620			AT2G42690	AT1G20225
AT4G24770			AT3G59540	AT1G20260
AT4G24820			AT2G43770	AT1G20340
AT4G24830			AT2G43790	AT1G20480
AT4G25100			AT2G43910	AT1G22530
AT4G25130			AT2G43940	AT4G09800
AT4G25280			AT2G44100	AT1G70490
AT4G25370			AT2G44160	AT1G25490
AT4G25550			AT2G45000	AT1G26750
AT4G26110			AT2G45200	AT1G27090
AT4G26210			AT2G45240	AT1G27400
AT4G26300			AT2G45330	AT1G27435
AT4G26410			AT2G45470	AT1G27970
AT4G26500			AT2G45540	AT1G29250
AT4G26620			AT2G45630	AT1G30230
AT4G26630			AT2G45730	AT1G30580
AT4G26670			AT2G46140	AT1G30690
AT4G26690			AT2G46520	AT1G31340
AT4G26780			AT2G47110	AT1G31812
AT4G26870			AT2G47610	AT1G32050
AT4G26900			AT2G47680	AT1G33810
AT4G26910			AT2G47960	AT1G35720
AT4G26970			AT3G01340	AT1G45000
AT4G27070			AT3G01520	AT1G47200
AT4G27090			AT3G02040	AT1G47278
AT4G27440			AT3G02260	AT1G48610
AT4G27450			AT3G02540	AT1G49820
AT4G27500			AT3G02560	AT1G50480
AT4G27585			AT3G02770	AT1G51590
AT5G53300			AT3G02870	AT1G51690
AT4G28220			AT3G02920	AT1G51760
AT4G28360			AT3G03250	AT1G53310
AT4G28390			AT3G03380	AT1G53850
AT4G28510			AT3G03920	AT1G55480
AT4G29010			AT3G04230	AT1G56340
AT4G29040			AT3G04520	AT1G56450
AT4G29060			AT3G04610	AT1G58280
AT4G29120			AT3G04780	AT1G60420
AT4G29130			AT3G04880	AT1G62380
AT4G29260			AT3G04920	AT1G62740
AT4G29410			AT3G05000	AT1G62820
AT4G29430			AT3G05420	AT1G62850
AT4G29480			AT3G05530	AT1G63000
AT4G29810			AT3G05560	AT1G63010
AT4G29830			AT3G05900	AT1G63050
AT4G29840			AT3G05910	AT1G63220
AT4G30000			AT3G06540	AT1G63290
AT4G30010			AT3G06580	AT1G66680
AT4G30160			AT3G06610	AT1G68010
AT4G30190			AT3G06720	AT1G68760
AT4G30270			AT3G06930	AT1G69620
AT4G30920			AT3G07050	AT1G70580
AT4G30930			AT3G07170	AT1G70600
AT4G31180			AT3G07300	AT1G71220
AT4G31210			AT3G07640	AT1G71500
AT4G31300			AT3G07750	AT1G71730
AT4G31340			AT3G07810	AT5G10330
AT4G31460			AT3G08510	AT1G72150
AT4G31480			AT3G08590	AT1G73230
AT4G31700			AT3G09300	AT1G76060
AT4G31810			AT3G09350	AT1G76550
AT4G31990			AT3G09500	AT1G77510
AT4G32180			AT3G09800	AT1G77540
AT4G32400			AT5G03850	AT1G78150
AT4G32470			AT3G10300	AT1G78570
AT4G32520			AT3G10610	AT1G78830
AT4G32605			AT3G10850	AT1G78870
AT4G32640			AT3G11250	AT1G78890
AT4G32720			AT3G11270	AT1G79210
AT4G33010			AT3G11330	AT1G79500
AT4G33030			AT3G11510	AT1G79870
AT4G33070			AT3G11710	AT1G79920
AT4G33090			AT3G11910	AT1G79930
AT4G33250			AT3G12110	AT2G02100
AT4G33510			AT3G12270	AT2G02560
AT4G33520			AT3G12290	AT2G02990
AT4G33650			AT3G12390	AT2G03390
AT4G33670			AT3G12580	AT2G03680
AT4G33680			AT3G12600	AT2G03800
AT4G33760			AT3G12760	AT2G04280
AT4G34030			AT3G13224	AT2G07360
AT4G34050			AT3G13235	ATMG01270
AT4G34110			AT3G13300	ATMG00480
AT4G34180			AT3G13570	ATMG00290
AT4G34200			AT3G13990	AT2G14260
AT4G34230			AT3G14100	AT2G14720
AT4G34310			AT3G14290	AT2G15860
AT4G34350			AT3G14310	AT2G16950
AT4G34450			AT3G14600	AT2G17120
AT4G34460			AT3G14790	AT2G17190
AT4G34490			AT3G14940	AT2G17280
AT4G34660			AT3G15180	AT2G17360
AT4G34670			AT3G15610	AT2G17390
AT4G34700			AT3G16050	AT2G17980
AT4G34740			AT3G16110	AT2G18040
AT4G34870			AT3G16520	AT2G18110
AT4G35000			AT3G16780	AT5G56670
AT4G35090			AT3G16850	AT2G20490
AT4G35260			AT3G17210	AT2G20760
AT4G35300			AT3G17770	AT2G21250
AT4G35460			AT3G17790	AT2G21580
AT4G35490			AT3G17840	AT2G21640
AT4G35630			AT3G17880	AT2G22125
AT4G35830			AT3G17900	AT2G22475
AT4G35850			AT3G17940	AT2G23820
AT4G35860			AT3G18000	AT2G24200
AT4G36130			AT3G18035	AT2G25060
AT4G36400			AT3G18060	AT2G26300
AT4G36420			AT3G18165	AT2G26670
AT4G36680			AT3G18940	AT2G27190
AT4G36760			AT3G19130	AT2G27510
AT4G37000			AT3G19400	AT2G27530
AT4G37660			AT3G19420	AT2G27710
AT4G37830			AT3G19760	AT2G27720
AT4G37870			AT3G20790	AT2G27860
AT4G37910			AT3G22110	AT2G29630
AT4G37930			AT3G22480	AT2G30110
AT4G38150			AT3G22590	AT2G30930
AT4G38220			AT3G22630	AT2G30950
AT4G38460			AT3G22850	AT2G32060
AT4G38510			AT3G22980	AT2G32260
AT4G38740			AT3G23325	AT2G32730
AT4G39080			AT3G23600	AT2G33590
AT4G39150			AT3G23660	AT2G33830
AT4G39200			AT3G24830	AT2G34680
AT4G39230			AT3G25150	AT2G35500
AT4G39260			AT3G25230	AT3G53750
AT4G39460			AT3G25545	AT2G38730
AT4G39520			AT3G25800	AT2G38740
AT4G39660			AT3G26380	AT2G38760
AT4G39690			AT3G26400	AT2G38770
AT4G39730			AT3G26720	AT2G38940
AT4G39740			AT3G27190	AT2G38960
AT4G39850			AT3G27400	AT2G39390
AT4G39880			AT3G27430	AT2G39900
AT4G39980			AT3G27530	AT2G39990
AT5G01220			AT3G28500	AT2G40290
AT5G01410			AT3G28730	AT2G40300
AT5G01650			AT3G28930	AT2G40590
AT5G02050			AT3G28940	AT2G40600
AT5G02490			AT3G28950	AT2G40660
AT5G02500			AT3G29350	AT2G41480
AT5G02530			AT3G29360	AT2G41530
AT5G02740			AT3G42790	AT2G42680
AT5G02870			AT3G43600	AT2G43160
AT5G02960			AT5G62300	AT3G59540
AT5G03290			AT3G45960	AT2G43940
AT5G03300			AT3G46000	AT2G44100
AT5G03540			AT3G46460	AT2G44620
AT5G03630			AT3G46940	AT2G45200
AT5G03740			AT3G47000	AT2G45240
AT5G04130			AT3G47590	AT2G46140
AT5G04430			AT3G48530	AT2G46540
AT5G04590			AT3G48670	AT2G47610
AT5G04740			AT3G48690	AT3G01390
AT5G04750			AT3G48710	AT3G02870
AT5G04830			AT3G48860	AT3G02880
AT5G05000			AT3G49870	AT3G03070
AT5G05010			AT3G50000	AT3G03250
AT5G05340			AT3G50210	AT3G03920
AT5G05520			AT3G50520	AT3G04920
AT5G05730			AT3G50590	AT3G05530
AT5G05780			AT3G51250	AT3G05560
AT5G05980			AT3G51310	AT3G06610
AT5G05990			AT3G51550	AT3G06720
AT5G06060			AT3G51670	AT3G08510
AT5G06210			AT3G51780	AT3G08590
AT5G06410			AT3G51980	AT3G09740
AT5G06460			AT3G52580	AT5G03850
AT5G06580			AT3G52630	AT3G10610
AT5G06600			AT3G53110	AT3G11510
AT5G06730			AT3G53180	AT3G11710
AT5G06860			AT3G53430	AT3G12050
AT5G07350			AT3G53520	AT3G12110
AT5G07440			AT3G53740	AT3G13990
AT5G08040			AT3G53880	AT3G14415
AT5G08060			AT3G53970	AT3G16050
AT5G08160			AT3G54180	AT3G16700
AT5G08280			AT3G54540	AT3G16780
AT5G08300			AT3G54900	AT3G17840
AT5G08530			AT3G55020	AT3G18780
AT5G08540			AT3G55220	AT3G22110
AT5G08570			AT3G55260	AT3G22850
AT5G08610			AT3G55430	AT3G23490
AT5G09420			AT3G55460	AT3G24830
AT5G09510			AT3G55610	AT3G25230
AT5G09590			AT3G55620	AT3G25530
AT5G09650			AT3G56310	AT3G25800
AT5G09770			AT3G57410	AT3G26060
AT5G09810			AT3G57660	AT3G27400
AT5G09840			AT3G57890	AT3G28500
AT5G09900			AT3G58180	AT3G29360
AT5G10360			AT3G58500	AT4G33865
AT5G10450			AT3G59380	AT5G62300
AT5G10730			AT3G59970	AT3G45960
AT5G10860			AT3G60440	AT5G59613
AT5G10920			AT3G60450	AT3G46940
AT5G11040			AT3G60740	AT3G48860
AT5G11150			AT3G60820	AT3G49870
AT5G11200			AT3G60830	AT3G51160
AT5G11500			AT3G60860	AT3G51550
AT5G11520			AT3G61220	AT3G51670
AT5G11770			AT3G61650	AT3G51980
AT5G11880			AT3G61760	AT3G52140
AT5G11900			AT3G61860	AT3G52560
AT5G12040			AT3G62120	AT3G53110
AT5G12100			AT3G62290	AT3G53430
AT5G12110			AT3G62830	AT3G53560
AT5G12200			AT3G62940	AT3G53740
AT5G12250			AT3G63130	AT3G53890
AT5G12290			AT3G63250	AT3G54050
AT5G12370			AT3G66654	AT3G54900
AT5G12470			AT4G00810	AT3G55430
AT5G13030			AT4G00830	AT3G55750
AT5G13050			AT4G01070	AT3G57890
AT5G13110			AT4G01370	AT3G59920
AT5G13120			AT4G01400	AT3G60210
AT5G13280			AT4G01850	AT3G60245
AT5G13420			AT4G02060	AT3G61110
AT5G13430			AT4G02150	AT3G62120
AT5G13450			AT4G02230	AT3G62250
AT5G13490			AT4G02340	AT3G62460
AT5G13610			AT4G02450	AT3G62830
AT5G13650			AT4G02480	AT3G62920
AT5G13710			AT4G02570	AT3G63130
AT5G13780			AT4G02610	AT4G01850
AT5G14030			AT4G02720	AT4G02080
AT5G14040			AT4G02840	AT4G02340
AT5G14060			AT4G02860	AT4G02450
AT5G14105			AT4G03080	AT4G04910
AT5G14170			AT4G04040	AT4G08280
AT5G14220			AT4G04910	AT4G08520
AT5G14260			AT4G04950	AT4G11380
AT5G14580			AT4G09520	AT5G11750
AT5G14590			AT4G09670	AT4G13780
AT5G14780			AT4G10050	AT4G14030
AT5G15090			AT4G10320	AT4G14880
AT5G15200			AT4G11330	AT4G15802
AT5G15320			AT4G11380	AT4G15930
AT5G15450			AT4G11740	AT4G16566
AT5G15490			AT4G11820	AT4G18810
AT5G15640			AT4G12390	AT4G19640
AT5G15650			AT4G12910	AT4G20260
AT5G15700			AT4G13780	AT4G20410
AT5G15910			AT4G14030	AT4G20430
AT5G15980			AT4G14710	AT4G21090
AT5G16050			AT4G14800	AT4G22670
AT5G16130			AT4G14880	AT4G23760
AT5G16290			AT4G14930	AT4G24780
AT5G16390			AT4G15410	AT5G50460
AT5G16440			AT4G15790	AT4G25550
AT5G16450			AT4G15900	AT4G25840
AT5G16510			AT4G17190	AT4G26230
AT5G16660			AT4G17260	AT4G26690
AT5G16710			AT4G17510	AT4G27760
AT5G16730			AT4G17520	AT4G28060
AT5G16840			AT4G17720	AT4G28440
AT5G16880			AT4G17830	AT4G29040
AT5G16930			AT4G18905	AT4G29410
AT5G16950			AT4G18930	AT4G30280
AT5G16970			AT4G18950	AT4G31300
AT5G17020			AT4G19003	AT4G32260
AT5G17310			AT4G20260	AT4G34290
AT5G17330			AT4G21710	AT4G34460
AT5G17380			AT4G22010	AT4G34490
AT5G17530			AT4G22530	AT4G34670
AT5G17560			AT4G22720	AT4G36130
AT5G17710			AT4G24270	AT4G38370
AT5G17770			AT4G24550	AT4G38680
AT5G17920			AT4G24780	AT4G39200
AT5G18170			AT4G24840	AT5G01410
AT5G18380			AT5G50460	AT5G01650
AT5G18800			AT4G25340	AT5G02450
AT5G19150			AT4G25530	AT5G02960
AT5G19370			AT4G26230	AT5G03660
AT5G19440			AT4G26690	AT5G04750
AT5G19510			AT4G26750	AT5G05780
AT5G19550			AT4G26840	AT5G08690
AT5G19620			AT4G27000	AT5G09510
AT5G19760			AT4G27320	AT5G11150
AT5G19820			AT4G27490	AT5G11670
AT5G19990			AT4G27500	AT5G12140
AT5G20010			AT4G27640	AT5G12200
AT5G20040			AT4G28470	AT5G12250
AT5G20060			AT4G29040	AT5G13850
AT5G20070			AT4G29260	AT5G14910
AT5G20080			AT4G29350	AT5G15650
AT5G20090			AT4G29410	AT5G16510
AT5G20280			AT4G29490	AT5G16730
AT5G20290			AT4G29810	AT5G16880
AT5G20720			AT4G29830	AT5G17310
AT5G20830			AT4G30160	AT5G17380
AT5G20890			AT4G30280	AT5G18660
AT5G20950			AT4G30480	AT5G19440
AT5G21105			AT4G30890	AT5G19780
AT5G21160			AT4G31120	AT5G19820
AT5G21990			AT4G31300	AT5G20060
AT5G22060			AT4G31490	AT5G20070
AT5G22140			AT4G31580	AT5G20160
AT5G22350			AT4G31790	AT5G20280
AT5G22460			AT4G31840	AT5G20500
AT5G22510			AT4G32180	AT5G20920
AT5G22650			AT4G32760	AT5G21990
AT5G22780			AT4G32840	AT5G22330
AT5G22880			AT4G32930	AT5G23050
AT5G23050			AT4G33090	AT5G23290
AT5G23120			AT4G33400	AT5G23395
AT5G23140			AT4G33670	AT5G24165
AT5G23200			AT4G33945	AT5G24710
AT5G23250			AT4G34050	AT5G25460
AT5G23300			AT4G34270	AT5G26667
AT5G23395			AT4G34290	AT5G27120
AT5G23540			AT4G34490	AT5G27470
AT5G23860			AT4G34920	AT5G27640
AT5G24300			AT4G35300	AT5G27850
AT5G24400			AT4G35450	AT5G28060
AT5G24650			AT4G36020	AT5G35590
AT5G24710			AT4G36130	AT5G37600
AT5G25100			AT4G36195	AT5G38470
AT5G25450			AT4G36350	AT5G39570
AT5G25940			AT4G36760	AT5G40080
AT5G26030			AT4G36940	AT5G40370
AT5G26360			AT4G37190	AT5G41080
AT5G26570			AT4G37210	AT5G41520
AT5G26667			AT4G38400	AT5G42740
AT5G26710			AT4G38510	AT5G42790
AT5G26742			AT4G38630	AT5G42850
AT5G26780			AT4G38800	AT5G42890
AT5G26830			AT4G38890	AT5G43330
AT5G26860			AT4G39150	AT5G43830
AT5G27120			AT4G39200	AT5G44130
AT5G27380			AT4G39280	AT5G45590
AT5G27395			AT4G39520	AT5G45750
AT5G27470			AT4G39800	AT5G46430
AT5G27540			AT5G01410	AT5G47200
AT5G27600			AT5G02240	AT5G47210
AT5G27640			AT5G02960	AT5G47700
AT5G27660			AT5G03300	AT5G48810
AT5G27740			AT5G03660	AT5G49210
AT5G27760			AT5G05780	AT5G49810
AT5G27820			AT5G05980	AT5G49820
AT5G28060			AT5G06110	AT5G49940
AT5G28540			AT5G06140	AT5G51480
AT5G28840			AT5G06460	AT5G51830
AT5G30510			AT5G06600	AT5G52370
AT5G35360			AT5G06730	AT5G52650
AT5G35430			AT5G07370	AT5G53400
AT5G35590			AT5G08100	AT5G54430
AT5G36210			AT5G08450	AT5G54550
AT5G36230			AT5G09390	AT5G54760
AT5G36880			AT5G09510	AT5G54770
AT5G37475			AT5G09620	AT5G54900
AT5G37510			AT5G09830	AT5G55230
AT5G37530			AT5G10540	AT5G55730
AT5G37600			AT5G10560	AT5G56010
AT5G37850			AT5G10870	AT5G56350
AT5G38480			AT5G11040	AT5G56680
AT5G39410			AT5G11500	AT5G57290
AT5G39570			AT5G11580	AT5G57890
AT5G39600			AT5G11670	AT5G58290
AT5G39740			AT5G11710	AT5G59290
AT5G39840			AT5G11720	AT5G60460
AT5G40080			AT5G11850	AT5G60980
AT5G40370			AT5G11900	AT5G61170
AT5G40490			AT5G11950	AT5G62700
AT5G40650			AT5G12140	AT5G62740
AT5G40760			AT5G12250	AT5G63380
AT5G40770			AT5G12410	AT5G63680
AT5G40810			AT5G13200	AT5G64350
AT5G40870			AT5G13370	AT5G64670
AT5G40930			AT5G13520	AT5G65430
AT5G41210			AT5G13530	AT5G67220
AT5G41670			AT5G13780	AT5G67490
AT5G41685			AT5G13850	ATCG00130
AT5G41940			AT5G14250	ATCG00770
AT5G41950			AT5G14450
AT5G41970			AT5G14520
AT5G42020			AT5G14540
AT5G42080			AT5G14600
AT5G42150			AT2G33830
AT5G42270			AT2G35630
AT5G42740			AT2G37790
AT5G42960			AT2G38710
AT5G42980			AT2G38730
AT5G43010			AT2G38760
AT5G43060			AT2G38770
AT5G43280			AT2G40290
AT5G43330			AT2G40550
AT5G43430			AT2G42230
AT5G43780			AT2G43160
AT5G43940			AT2G43980
AT5G43960			AT2G45790
AT5G43970			AT2G46890
AT5G44070			AT3G62840
AT5G44340			AT2G47970
AT5G44710			AT3G01390
AT5G44730			AT3G02760
AT5G44780			AT3G02880
AT5G45170			AT3G03980
AT5G45390			AT3G04600
AT5G45590			AT3G04710
AT5G46020			AT3G04820
AT5G46070			AT3G07090
AT5G46160			AT3G07410
AT5G46180			AT3G07660
AT5G46290			AT3G07720
AT5G46630			AT3G07880
AT5G46800			AT3G08943
AT5G47010			AT3G10220
AT5G47030			AT3G10380
AT5G47320			AT3G10410
AT5G47570			AT3G11400
AT5G47770			AT3G11830
AT5G47890			AT3G12050
AT5G48030			AT3G13460
AT5G48230			AT3G16760
AT5G48760			AT3G16980
AT5G48960			AT3G16990
AT5G48970			AT3G18130
AT5G49210			AT3G18740
AT5G49555			AT3G18780
AT5G49650			AT3G18790
AT5G49720			AT3G23490
AT5G49810			AT3G23810
AT5G49830			AT3G25530
AT5G49840			AT3G26340
AT5G49910			AT3G26420
AT5G49970			AT3G27300
AT5G50210			AT4G33865
AT5G50250			AT3G44620
AT5G50340			AT3G46970
AT5G50370			AT3G49470
AT5G50810			AT3G49600
AT5G50850			AT3G51160
AT5G50920			AT3G52140
AT5G51040			AT3G52190
AT5G51050			AT3G52560
AT5G51220			AT3G52660
AT5G51430			AT3G53620
AT5G51570			AT3G53890
AT5G51660			AT3G54360
AT5G51740			AT3G55750
AT5G51820			AT3G56190
AT5G52040			AT3G56240
AT5G52240			AT3G58110
AT5G52370			AT3G59920
AT5G52470			AT3G59990
AT5G52520			AT3G60245
AT5G52560			AT3G61110
AT5G52640			AT3G61140
AT5G52840			AT3G61240
AT5G52920			AT3G62010
AT5G53070			AT3G62250
AT5G53350			AT3G62370
AT5G53400			AT3G63000
AT5G53460			AT4G02080
AT5G53480			AT4G08520
AT5G53560			AT4G13720
AT5G53620			AT4G14110
AT5G53650			AT4G15210
AT5G53850			AT4G15802
AT5G54100			AT4G15930
AT5G54310			AT4G17100
AT5G54440			AT4G17890
AT5G54500			AT4G19006
AT5G54510			AT4G20410
AT5G54580			AT4G21580
AT5G54770			AT4G22570
AT5G54810			AT4G22670
AT5G54960			AT4G24220
AT5G55070			AT4G24800
AT5G55140			AT4G25550
AT5G55200			AT4G26650
AT5G55220			AT4G28440
AT5G55280			AT4G29160
AT5G55480			AT4G29510
AT5G55610			AT4G29680
AT5G55730			AT4G30260
AT5G55940			AT4G31180
AT5G56000			AT4G32285
AT5G56030			AT4G32720
AT5G56350			AT4G33250
AT5G56500			AT4G34215
AT5G56680			AT4G34660
AT5G56940			AT4G34670
AT5G57110			AT4G34890
AT5G57290			AT4G35360
AT5G57300			AT4G35800
AT5G57490			AT4G35890
AT5G57590			AT4G38370
AT5G57655			AT4G38680
AT5G57850			AT4G38930
AT5G57870			AT5G10980
AT5G58005			AT5G01650
AT5G58060			AT5G02450
AT5G58070			AT5G03540
AT5G58220			AT5G04280
AT5G58240			AT5G04430
AT5G58290			AT5G05340
AT5G58330			AT5G06060
AT5G58370			AT5G08160
AT5G58490			AT5G08690
AT5G58590			AT5G10240
AT5G58710			AT5G11110
AT5G59160			AT5G11150
AT5G59420			AT5G11810
AT5G59440			AT5G12110
AT5G59840			AT5G12200
AT5G59880			AT5G13560
AT5G59950			AT5G13680
AT5G60160			AT5G14790
AT5G60460			AT5G14800
AT5G60590			AT5G15270
AT5G60600			AT5G15400
AT5G60640			AT5G15650
AT5G60730			AT5G15810
AT5G60790			AT5G16260
AT5G60960			AT5G16280
AT5G61030			AT5G16440
AT5G61220			AT5G16450
AT5G61510			AT5G16510
AT5G61780			AT5G16730
AT5G61790			AT5G16760
AT5G61810			AT5G16880
AT5G61970			AT5G16990
AT5G62270			AT5G17000
AT5G62390			AT5G17310
AT5G62530			AT5G17380
AT5G62740			AT5G18070
AT5G62810			AT5G18200
AT5G63310			AT5G18230
AT5G63380			AT5G18400
AT5G63400			AT5G18420
AT5G63510			AT5G19150
AT5G63570			AT5G19180
AT5G63620			AT5G19320
AT5G63840			AT5G19440
AT5G63890			AT5G19485
AT5G63980			AT5G19680
AT5G64050			AT5G19780
AT5G64120			AT5G19820
AT5G64260			AT5G19990
AT5G64270			AT5G20060
AT5G64370			AT5G20070
AT5G64400			AT5G20160
AT5G64460			AT5G20280
AT5G64670			AT5G20400
AT5G65020			AT5G20500
AT5G65110			AT5G20570
AT5G65270			AT5G20920
AT5G65430			AT5G20950
AT5G65560			AT5G20990
AT5G65620			AT5G21060
AT5G65720			AT5G21105
AT5G65750			AT5G21274
AT5G65940			AT5G21326
AT5G66090			AT5G21990
AT5G66120			AT5G22010
AT5G66510			AT5G22030
AT5G66680			AT5G22080
AT5G66720			AT5G22120
AT5G66760			AT5G22320
AT5G66860			AT5G22330
AT5G66920			AT5G22460
AT5G67490			AT5G22480
AT5G67500			AT5G22780
AT5G67510			AT5G22950
AT5G67590			AT5G23290
ATCG00120			AT5G23400
ATCG00480			AT5G23570
ATCG00490			AT5G23860
ATCG00500			AT5G23900
ATCG00670			AT5G24710
ATMG00070			AT5G24750
ATMG00090			AT5G24760
ATMG00160			AT5G24840
ATMG00510			AT5G25070
ATMG00640			AT5G25460
AT1G01100			AT5G25757
AT1G01300			AT5G25780
AT1G01910			AT5G26210
AT1G01940			AT5G26667
AT1G01960			AT5G27120
AT1G02080			AT5G27450
AT1G02140			AT5G27470
AT1G02690			AT5G27640
AT1G02840			AT5G27700
AT1G03110			AT5G27740
AT1G03330			AT5G27850
AT1G03350			AT5G28050
AT1G04080			AT5G28060
AT1G04710			AT5G34850
AT1G04810			AT5G35590
AT1G50010			AT5G35620
AT1G04850			AT5G37475
AT1G04870			AT5G37600
AT1G05010			AT5G37720
AT1G05350			AT5G37830
AT1G05620			AT5G37850
AT1G05730			AT5G38470
AT1G06210			AT5G38830
AT1G06410			AT5G39320
AT1G06570			AT5G39570
AT1G06760			AT5G39720
AT1G06900			AT5G39730
AT1G07140			AT5G39740
AT1G07370			AT5G40370
AT5G59970			AT5G40870
AT5G59850			AT5G41080
AT5G60390			AT5G41520
AT1G07990			AT5G41770
AT1G08370			AT5G41950
AT1G08420			AT5G42740
AT1G08780			AT5G42790
AT1G08880			AT5G42850
AT1G08980			AT5G42890
AT1G09270			AT5G42970
AT1G09490			AT5G43010
AT1G57860			AT5G43060
AT1G09760			AT5G43330
AT1G09770			AT5G43830
AT1G09870			AT5G43900
AT1G10590			AT5G43960
AT2G47170			AT5G44090
AT1G10940			AT5G44130
AT1G11890			AT5G44170
AT1G12270			AT5G44320
AT1G12900			AT5G44635
AT1G12920			AT5G44720
AT1G13020			AT5G45620
AT1G13060			AT5G45750
AT1G13690			AT5G46020
AT1G14710			AT5G46280
AT1G15230			AT5G46430
AT1G15280			AT5G46630
AT1G15340			AT5G46750
AT1G15730			AT5G47200
AT1G15790			AT5G47210
AT1G15910			AT5G47700
AT1G15930			AT5G47760
AT1G16520			AT5G47880
AT1G16890			AT5G48180
AT1G17710			AT5G48480
AT1G17890			AT5G48760
AT1G18210			AT5G48810
AT1G18450			AT5G48870
AT1G19130			AT5G48930
AT1G19570			AT5G49020
AT1G20020			AT5G49460
AT1G20225			AT5G49510
AT1G20260			AT5G49650
AT1G20340			AT5G49720
AT1G20370			AT5G49810
AT1G20480			AT5G49830
AT1G21630			AT5G49880
AT1G21720			AT5G49930
AT1G22270			AT5G49980
AT4G09800			AT5G50680
AT1G23190			AT5G50870
AT1G23290			AT5G50960
AT1G70490			AT5G51280
AT1G23820			AT5G51480
AT1G24050			AT5G51550
AT1G25211			AT5G51590
AT1G25490			AT5G51700
AT1G26570			AT5G51830
AT1G27130			AT5G51840
AT1G27310			AT5G51970
AT1G28120			AT5G52040
AT1G28350			AT5G52200
AT1G29250			AT5G52310
AT1G29350			AT5G52560
AT1G29850			AT5G52640
AT1G29990			AT5G52650
AT1G30230			AT5G53000
AT1G30470			AT5G53120
AT1G30630			AT5G53400
AT1G30690			AT5G53530
AT1G31070			AT5G53620
AT1G32050			AT5G54430
AT1G32490			AT5G54440
AT1G33810			AT5G54510
AT1G35140			AT5G54750
AT1G35580			AT5G54760
AT1G35780			AT5G54770
AT1G36310			AT5G54900
AT1G43670			AT5G54960
AT1G43690			AT5G55130
AT1G43700			AT5G55160
AT1G43710			AT5G55230
AT1G44790			AT5G55530
AT1G44835			AT5G55660
AT1G44900			AT5G55730
AT1G44910			AT5G55940
AT1G45000			AT5G56010
AT1G47710			AT5G56280
AT1G48160			AT5G56350
AT1G48610			AT5G56630
AT1G49340			AT5G56680
AT1G49600			AT5G56740
AT1G49660			AT5G56760
AT1G50500			AT5G56950
AT1G50570			AT5G57020
AT1G50670			AT5G57290
AT1G51360			AT5G57330
AT1G51510			AT5G57410
AT1G51690			AT5G57440
AT1G51760			AT5G57950
AT1G52260			AT5G58230
AT3G16080			AT5G58290
AT1G52380			AT5G58440
AT1G52570			AT5G58450
AT1G53500			AT5G58590
AT1G53850			AT5G59140
AT1G55090			AT5G59160
AT1G55250			AT5G59290
AT1G55500			AT5G59420
AT1G56340			AT5G59890
AT1G58280			AT5G59950
AT1G59359			AT5G60160
AT1G59600			AT5G60360
AT1G59710			AT5G60460
AT1G59760			AT5G60540
AT1G59830			AT5G60790
AT1G60080			AT5G60980
AT1G60730			AT5G61170
AT1G61150			AT5G61500
AT1G62380			AT5G61970
AT1G62390			AT5G62700
AT1G62810			AT5G62740
AT1G62820			AT5G63220
AT1G63010			AT5G63680
AT1G63020			AT5G63860
AT1G63050			AT5G63990
AT1G63210			AT5G64130
AT1G63290			AT5G64140
AT1G63640			AT5G64250
AT1G64740			AT5G64260
AT1G64760			AT5G64270
AT1G65970			AT5G64350
AT1G66070			AT5G65010
AT1G66080			AT5G65270
AT1G66260			AT5G65430
AT1G66530			AT5G65760
AT1G66680			AT5G66040
AT1G67630			AT5G67100
AT1G68010			AT5G67220
AT1G68760			AT5G67510
AT1G68790			AT5G67630
AT1G69030
AT1G69250
AT1G69410
AT1G69510
AT1G69620
AT1G69800
AT1G70310
[truncated: 681 more rows]
