# Supplementary material for: The boundary of life and death: changes in mitochondrial and cytosolic proteomes associated with programmed cell death of Arabidopsis thaliana suspension culture cells
Source: Front Plant Sci. 2023 Aug 1;14:1194866. doi: 10.3389/fpls.2023.1194866 (PMC10431908; doi:10.3389/fpls.2023.1194866)
Supplement: Supplementary file 3 [file Table_2.xlsx]

## Sheet: Table S2
Supplemental Table S2: Predicted localization of 76 proteins unique to mitochondrial fraction and absent from reference proteome (Jiang et al. 2021).
(A) Predictions using SUBA consensus localization tool, including available experimental evidence for protein localisation from the SUBA database.
Proteins predicted to be mitochondrial that were previously not experimentally validated via MS are highlighted in red font (8 proteins).
(B) Cellular prediction of localization using MuLocDeep.
(A)						(B)
Output from SUBA4 analysis including available experimental evidence for protein localization.						Output from MuLoc analysis
Protein Properties		Location Consensus	Location Experiments			Protein	Prediction
Gene	Description	Location SUBAcon	Location GFP	Location Mass Spec		AT2G39900	Cytoplasm
AT5G49820	Protein of unknown function, DUF647;	cytosol			a	AT5G57890	Cytoplasm
AT4G27760	NAD(P)-binding Rossmann-fold superfamily protein;Encodes an oxidoreductase required for vegetative shoot apex development. Mutants display disruptions in leaf positioning and meristem maintenance.	endoplasmic reticulum		endoplasmic reticulum:22923678;mitochondrion:21896887	a	ATMG01270	Cytoplasm
AT2G02990	ribonuclease 1;member of the ribonuclease T2 family, responds to inorganic phosphate starvation, and inhibits production of anthocyanin. Also involved in wound-induced signaling independent of jasmonic acid.	extracellular		extracellular:14595688;extracellular:16356755;extracellular:28003327;plasma membrane:17317660;plasma membrane:21433285	a	AT5G23050	CytoplasmPeroxisome
AT4G20430	Subtilase family protein;	extracellular		extracellular:24665109;extracellular:28155257	a	ATCG00130	Endoplasmic
AT2G04280	;	golgi		golgi:22430844;golgi:22923678;golgi:25900983;golgi:25122472;golgi:25900983;golgi:25900983;golgi:25900983;plasma membrane:19334764;plasma membrane:21433285	a	AT2G04280	Golgi_apparatus
AT4G19640	Ras-related small GTP-binding family protein;Encodes Ara7.	golgi,endoplasmic reticulum	endoplasmic reticulum:11532937;endoplasmic reticulum:15546360;endoplasmic reticulum:15659621;endoplasmic reticulum:15743878;endoplasmic reticulum:16103374;endoplasmic reticulum:16399085;endoplasmic reticulum:16723734;endoplasmic reticulum:16856980;golgi:15561767;golgi:11532937;golgi:12553910;golgi:16461582;golgi:17259264;golgi:18055610;golgi:23532067;golgi:23682115;plasma membrane:11532937;vacuol…	endoplasmic reticulum:22923678;golgi:25900983;golgi:25900983;golgi:25900983;golgi:25900983;golgi:25900983;plasma membrane:17644812;plasma membrane:26781341;vacuole:25900983	a	AT3G09740	Golgi_apparatus
AT1G15220	cytochrome c biogenesis protein family;Encodes a protein with oxidoreductase activity present in the inner membrane of mitochondria. CCMH is postulated to play a central role in mitochondrial cytochrome c maturation, probably as part of a heme lyase complex that also holds activity of reducing apocytochrome c. CCMH interacts with apocytochrome AtCYTc-a and is shown to be present in a 500 kDa-comp…	mitochondrion		mitochondrion:14671022;mitochondrion:27122571;mitochondrion:27943495	a	AT2G26300	Membrane
AT1G26750	;	mitochondrion		mitochondrion:21841088;mitochondrion:27943495	a	AT4G19640	Membrane
AT1G27435	;	mitochondrion		mitochondrion:27943495	a	AT4G34460	Membrane
AT1G47278	;	mitochondrion		mitochondrion:27943495	a	ATMG00480	Membrane
AT1G71730	;	mitochondrion			a	AT1G04710	Mitochondrion
AT1G76060	LYR family of Fe/S cluster biogenesis protein;mutant has Embryo defect	mitochondrion		mitochondrion:27943495	a	AT1G15220	Mitochondrion
AT1G78890	;	mitochondrion			a	AT1G26750	Mitochondrion
AT2G21640	;Encodes a protein of unknown function that is a marker for oxidative stress response.	mitochondrion	mitochondrion:19995732;unclear:21443605	mitochondrion:12492832;mitochondrion:14671022;mitochondrion:21296373;mitochondrion:21472856;mitochondrion:27943495	a	AT1G27435	Mitochondrion
AT2G44620	mitochondrial acyl carrier protein 1;Encodes a member of the mitochondrial acyl carrier protein (ACP) family. As part of the mitochondrial matrix, it is likely to be involved in fatty acid or lipoic acid biogenesis. Its acylated form is predominantly present in the mitochondrial membrane while the non-acylated form is soluble.	mitochondrion		mitochondrion:24727099;mitochondrion:27122571	a	AT1G47278	Mitochondrion
AT2G46540	;	mitochondrion		mitochondrion:14671022;mitochondrion:15276431;mitochondrion:21472856;mitochondrion:22923678;mitochondrion:23761796;mitochondrion:27943495	a	AT1G62850	Mitochondrion
AT3G03070	NADH-ubiquinone oxidoreductase-related;	mitochondrion		mitochondrion:14671022;mitochondrion:17406791;mitochondrion:20197505;mitochondrion:21296373;mitochondrion:21472856;mitochondrion:23761796;mitochondrion:27122571;mitochondrion:27943495	a	AT1G71730	Mitochondrion
AT3G16700	Fumarylacetoacetate (FAA) hydrolase family;	mitochondrion		mitochondrion:21472856	a	AT1G76060	Mitochondrion
AT3G62460	Putative endonuclease or glycosyl hydrolase;	mitochondrion		mitochondrion:14671022	a	AT1G78890	Mitochondrion
AT3G62920	;	mitochondrion		mitochondrion:27943495	a	AT2G23820	Mitochondrion
AT4G08280	Thioredoxin superfamily protein;	mitochondrion		mitochondrion:27943495	a	AT2G44620	Mitochondrion
AT4G21090	MITOCHONDRIAL FERREDOXIN 2;	mitochondrion	mitochondrion:13677469		a	AT2G46540	Mitochondrion
AT4G23760	Cox19-like CHCH family protein;	mitochondrion		mitochondrion:27943495	a	AT3G03070	Mitochondrion
AT4G25840	glycerol-3-phosphatase 1;	mitochondrion			a	AT3G16700	Mitochondrion
AT4G28060	Cytochrome c oxidase, subunit Vib family protein;	mitochondrion		mitochondrion:12586869;mitochondrion:14671022;mitochondrion:27122571;mitochondrion:27943495	a	AT3G62460	Mitochondrion
AT5G04750	F1F0-ATPase inhibitor protein, putative;	mitochondrion		mitochondrion:24727099;mitochondrion:27943495	a	AT3G62920	Mitochondrion
AT5G11750	Ribosomal protein L19 family protein;	mitochondrion			a	AT4G21090	Mitochondrion
AT5G24165	;	mitochondrion		mitochondrion:21472856;mitochondrion:27943495;nucleus:27177187	a	AT4G25840	Mitochondrion
AT5G40080	Mitochondrial ribosomal protein L27;	mitochondrion			a	AT4G27760	Mitochondrion
AT5G45590	Ribosomal protein L35;	mitochondrion		mitochondrion:27943495	a	AT4G28060	Mitochondrion
AT5G49210	;	mitochondrion		mitochondrion:27943495	a	AT5G04750	Mitochondrion
AT5G52370	;	mitochondrion			a	AT5G23395	Mitochondrion
AT5G54550	Protein of unknown function (DUF295);	mitochondrion			a	AT5G40080	Mitochondrion
AT5G59613	;	mitochondrion		mitochondrion:18189341;mitochondrion:27943495	a	AT5G45590	Mitochondrion
AT5G64670	Ribosomal protein L18e/L15 superfamily protein;	mitochondrion		mitochondrion:21841088;mitochondrion:27943495	a	AT5G49210	Mitochondrion
AT5G67490	;	mitochondrion		mitochondrion:21472856	a	AT5G52370	Mitochondrion
ATMG00290	mitochondrial ribosomal protein S4;encodes a mitochondrial ribosomal protein S4, a constituent of the small subunit of the ribosomal complex	mitochondrion		mitochondrion:15276431;mitochondrion:27943495	a	AT5G54550	Mitochondrion
ATMG00480	Plant mitochondrial ATPase, F0 complex, subunit 8 protein;Encodes subunit 8 of the mitochondrial F(O) ATP synthase complex.	mitochondrion		mitochondrion:12681508;mitochondrion:14671022;mitochondrion:18189341;mitochondrion:21841088;mitochondrion:24727099;mitochondrion:27943495;unclear:16618929	a	AT5G59613	Mitochondrion
ATMG01270	mitochondrial ribosomal protein S7;encodes a mitochondrial ribosomal protein S7, a constituent of the small subunit of the ribosomal complex	mitochondrion		mitochondrion:27943495	a	AT5G64670	Mitochondrion
AT1G05730	Eukaryotic protein of unknown function (DUF842);	nucleus			a	AT5G67490	Mitochondrion
AT2G39900	GATA type zinc finger transcription factor family protein;	nucleus	cytoskeleton:20817848		a	ATCG00770	Mitochondrion
AT1G04710	peroxisomal 3-ketoacyl-CoA thiolase 4;EC2.3.1.16 thiolase.	peroxisome	peroxisome:17120136	cytoskeleton:24134884;peroxisome:17951448;peroxisome:18931141;peroxisome:19329564;peroxisome:24130194	a	ATMG00290	Mitochondrion
AT1G20480	AMP-dependent synthetase and ligase family protein;	peroxisome		peroxisome:18931141	a	AT5G11750	Mitochondrion
AT1G68010	hydroxypyruvate reductase;Encodes hydroxypyruvate reductase.	peroxisome		cytoskeleton:24134884;mitochondrion:27122571;mitochondrion:27943495;nucleus:27177187;peroxisome:12154131;peroxisome:17951448;peroxisome:18931141;peroxisome:19329564;peroxisome:24130194;plasma membrane:25641898;plasma membrane:22215637;plastid:19288221;plastid:20061580;plastid:24361574;plastid:24872594;plastid:24872594	a	AT1G05730	Nucleus
AT1G70580	alanine-2-oxoglutarate aminotransferase 2;Encodes a protein with glyoxylate aminotransferase activity. It can act on a number of different small substrates and amino acids in vitro.	peroxisome		mitochondrion:27943495;nucleus:23396599;peroxisome:12154131;peroxisome:17951448;peroxisome:18931141;peroxisome:19329564;peroxisome:24130194;plastid:18633119;plastid:24361574	a	AT1G33810	Nucleus
AT3G14415	Aldolase-type TIM barrel family protein;	peroxisome		golgi:25900983;mitochondrion:23444301;mitochondrion:27943495;nucleus:14617066;peroxisome:12154131;peroxisome:17951448;peroxisome:18931141;peroxisome:19329564;peroxisome:24130194;plasma membrane:25641898;plasma membrane:19334764;plastid:23851315;plastid:18633119;plastid:20061580;plastid:24361574;vacuole:25900983	a	AT2G21640	Nucleus
AT4G16566	histidine triad nucleotide-binding 4;Encodes a protein that has an unexpected bifunctional capability in vitro. The purified enzyme has adenylylsulfate sulfohydrolase activity (E.C. 3.6.2.1) and ADP-sulfurylase activity (E.C. 2.7.7.5). The latter is activated at low pH. The enzyme can exert it phosphorylase activity on a range of related substrates in vitro, but it acts best with APS (adenosine 5…	peroxisome	peroxisome:19329564	mitochondrion:27943495;peroxisome:17951448;peroxisome:18931141;peroxisome:19329564;peroxisome:24130194	a	AT4G23760	Nucleus
AT5G23050	acyl-activating enzyme 17;	peroxisome	peroxisome:22920973;plastid:22920973	peroxisome:18931141;peroxisome:19329564;plasma membrane:21433285	a	AT5G24165	Nucleus
AT5G23395	Cox19-like CHCH family protein;	peroxisome	mitochondrion:20829360;peroxisome:20829360	mitochondrion:27943495	a	AT1G20480	Peroxisome
AT5G63380	AMP-dependent synthetase and ligase family protein;Encodes a peroxisomal protein involved in the activation of fatty acids through esterification with CoA. At5g63380 preferentially activates fatty acids with increased chain length (C9:0 to C8:0) and thus shares characteristics with long-chain fatty acyl-CoA synthases. Also able to catalyze the conversion of OPDA to its CoA ester and is therefore …	peroxisome	peroxisome:15677481	peroxisome:19329564;plasma membrane:21433285	a	AT1G68010	Peroxisome
AT2G26300	G protein alpha subunit 1;Encodes an alpha subunit of a heterotrimeric GTP-binding protein. The active GTP-bound form of GPA1 binds to the GTG1 and GTG2 abscisic acid (ABA) receptors and appears to affect their GTPase and GTP-binding activity, and hence, ABA binding abilities. GPA1 is a positive regulator in ABA-mediated inhibition of stomatal opening. Plants with recessive mutant alleles have co…	plasma membrane	plasma membrane:12837948;plasma membrane:16679415;plasma membrane:17158913	plasma membrane:16618929;plasma membrane:17317660;plasma membrane:17644812;plasma membrane:20374526;plasma membrane:22215637;plasma membrane:22923678;plasma membrane:26781341	a	AT1G70580	Peroxisome
AT3G09740	syntaxin of plants 71;syntaxin of plants 71 (SYP71)	plasma membrane	cytosol:23515225;endoplasmic reticulum:15342965;endoplasmic reticulum:18827404;endoplasmic reticulum:23515225;golgi:18827404;plasma membrane:18827404;plasma membrane:23515225	golgi:25900983;golgi:25900983;golgi:25900983;golgi:25900983;golgi:21826108;golgi:25900983;mitochondrion:27122571;plasma membrane:25641898;plasma membrane:14517339;plasma membrane:15060130;plasma membrane:15574830;plasma membrane:16618929;plasma membrane:17317660;plasma membrane:17644812;plasma membrane:19334764;plasma membrane:20843791;plasma membrane:22215637;plasma membrane:22318864;plasma memb…	a	AT3G14415	Peroxisome
AT4G34460	GTP binding protein beta 1;Encodes the heterotrimeric G-protein beta subunit and is involved in organ shape. A significant fraction of the protein is found in the ER. Mutants carrying null alleles express similar fruit phenotypes, as seen in er plants, but differ from er in that the stem is only slightly shorter than that in the wild type, the pedicel is slightly longer than that in the wild type…	plasma membrane,endoplasmic reticulum	cytosol:17158913;golgi:17158913;nucleus:17492287;plasma membrane:16679415;plasma membrane:17158913;plasma membrane:17492287	plasma membrane:17317660;plasma membrane:22215637;plasma membrane:22318864;plasma membrane:22923678;plasma membrane:26781341	a	AT4G16566	Peroxisome
AT1G15730	Cobalamin biosynthesis CobW-like protein;	plastid		plastid:20423899;plastid:23851315;plastid:20061580;plastid:24361574	a	AT5G63380	Peroxisome
AT1G33810	;	plastid		plasma membrane:25641898;plastid:12938931;plastid:15322131;plastid:21531424;plastid:22923678;plastid:24872594;plastid:20061580;plastid:18431481	a	AT1G15730	Plastid
AT1G55480	protein containing PDZ domain, a K-box domain, and a TPR region;Encodes a member of a novel plant protein family containing a PDZ, a K-box, and a TPR motif. mRNA but not protein levels decrease after wounding. ZKT is phosphorylated at Thr and Ser residues after wounding.	plastid		plastid:12938931;plastid:15028209;plastid:15322131;plastid:20423899;plastid:21531424;plastid:23549413;plastid:23851315;plastid:25740923;plastid:20061580;plastid:24872594;plastid:18633119;plastid:21539947;plastid:24361574;plastid:18431481;plastid:20061580;plastid:24872594	a	AT1G55480	Plastid
AT1G71500	Rieske (2Fe-2S) domain-containing protein;	plastid	plastid:25511433	golgi:25900983;golgi:25900983;golgi:25900983;golgi:25900983;mitochondrion:27943495;plastid:12938931;plastid:14729914;plastid:15028209;plastid:15322131;plastid:21531424;plastid:23851315;plastid:23390424;plastid:24872594;plastid:24361574;plastid:18431481;plastid:20061580;plastid:23667806;plastid:24872594;vacuole:25900983	a	AT1G71500	Plastid
AT2G03390	uvrB/uvrC motif-containing protein;	plastid		plastid:18431481;plastid:24361574	a	AT2G03390	Plastid
AT2G23820	Metal-dependent phosphohydrolase;	plastid		cytosol:21166475;plastid:20061580	a	AT2G35500	Plastid
AT2G30950	FtsH extracellular protease family;Metalloprotease that functions in thylakoid membrane biogenesis. Involved in the repair of PSII following damaged incurred during photoinhibition. Forms a complex with VAR1. Mutants show a variegated phenotype, which decreases during development. Transcript and protein levels increase with light intensity.	plastid		golgi:25900983;golgi:25900983;golgi:25900983;mitochondrion:27122571;mitochondrion:27943495;plasma membrane:19334764;plasma membrane:21433285;plastid:11719511;plastid:12938931;plastid:14729914;plastid:15028209;plastid:15322131;plastid:16648217;plastid:19676087;plastid:21531424;plastid:23549413;plastid:23851315;plastid:23390424;plastid:24872594;plastid:24361574;plastid:18431481;plastid:18633119;pla…	a	AT2G40300	Plastid
AT2G35500	shikimate kinase like 2;	plastid		golgi:25900983;golgi:25900983;golgi:25900983;plastid:20423899;plastid:21531424;plastid:18431481;plastid:20061580;plastid:24361574;vacuole:25900983	a	AT3G26060	Plastid
AT2G40300	ferritin 4;Encodes FERRITIN 4, AtFER4. Ferritins are a class of 24-mer multi-meric proteins found in all kingdoms of life. Function as the main iron store in mammals. Evidence suggests that Arabidopsis ferritins are essential to protect cells against oxidative damage, but they do not constitute the major iron pool. Localize to mitochondria. Knock out mutants are not sensitive to abiotic stress.	plastid		plasma membrane:19334764;plasma membrane:22318864;plastid:12938931;plastid:20423899;plastid:21531424;plastid:18431481;plastid:18633119;plastid:20061580;plastid:24361574	a	AT3G54050	Plastid
AT3G26060	Thioredoxin superfamily protein;encodes periredoxin Q which decomposes peroxides and plays a role in the protection of the photosynthetic apparatus	plastid		extracellular:15157177;mitochondrion:27943495;plastid:12938931;plastid:15028209;plastid:15322131;plastid:18431481;plastid:20049866;plastid:20423899;plastid:21531424;plastid:22274653;plastid:23851315;plastid:20061580;plastid:24872594;plastid:24361574;plastid:16414959;plastid:20061580;plastid:24872594	a	AT3G60210	Plastid
AT3G53560	Tetratricopeptide repeat (TPR)-like superfamily protein;	plastid		plastid:15322131;plastid:18431481;plastid:22923678;plastid:20061580	a	AT4G18810	Plastid
AT3G54050	high cyclic electron flow 1;Encodes HCEF1 (High Cyclic Electron Flow 1). Mutant phenotype: constitutively elevated electron flow (CEFI).	plastid		mitochondrion:27122571;mitochondrion:27943495;plasma membrane:25641898;plastid:15028209;plastid:16207701;plastid:20423899;plastid:21531424;plastid:23851315;plastid:16923014;plastid:18431481;plastid:18433418;plastid:18633119;plastid:20061580;plastid:21539947;plastid:23549413;plastid:24361574;plastid:24872594	a	AT4G32260	Plastid
AT3G60210	GroES-like family protein;	plastid			a	AT5G10330	Plastid
AT4G18810	NAD(P)-binding Rossmann-fold superfamily protein;	plastid		plastid:20423899;plastid:21531424;plastid:23549413;plastid:24872594;plastid:18431481;plastid:20061580;plastid:24361574;plastid:24872594;vacuole:14760709	a	AT5G14910	Plastid
AT4G32260	ATPase, F0 complex, subunit B/B', bacterial/chloroplast;	plastid		mitochondrion:27943495;plasma membrane:19334764;plasma membrane:22215637;plastid:12938931;plastid:14729914;plastid:15028209;plastid:15322131;plastid:21531424;plastid:23851315;plastid:20061580;plastid:23390424;plastid:24872594;plastid:18431481;plastid:18633119;plastid:20061580;plastid:23667806;plastid:24872594	a	AT5G18660	Plastid
AT5G10330	histidinol phosphate aminotransferase 1;Encodes histidinol-phosphate aminotransferase that catalyzes the eighth step in histidine biosynthesis. Loss of function mutations are embryo lethal.	plastid		plastid:24361574	a	AT5G49820	Plastid
AT5G14910	Heavy metal transport/detoxification superfamily protein ;	plastid		nucleus:23396599;plastid:14729914;plastid:15028209;plastid:16207701;plastid:20423899;plastid:21531424;plastid:20061580;plastid:24872594;plastid:18431481;plastid:20061580;plastid:24361574;plastid:24872594	a	AT5G49940	Plastid
AT5G18660	NAD(P)-binding Rossmann-fold superfamily protein;Encodes a protein with 3,8-divinyl protochlorophyllide a 8-vinyl reductase activity. Mutants accumulate divinyl chlorophyll rather than monovinyl chlorophyll.	plastid		golgi:25900983;golgi:25900983;golgi:25900983;plastid:12938931;plastid:18431481;plastid:20423899;plastid:21531424;plastid:23851315;plastid:20061580;plastid:24872594;plastid:24361574;plastid:20061580;plastid:24872594;vacuole:25900983	a	AT2G30950	Plastid
AT5G49940	NIFU-like protein 2;Encodes a protein containing the NFU domain and functions as a molecular scaffold for iron-sulfur cluster assembly and delivery. Homologous to the cyanobacterial CNFU protein and is targeted to the chloroplast.	plastid	plastid:12553879;plastid:19224954	plastid:18431481;plastid:20061580	a	AT3G53560	Plastid
AT5G57890	Glutamine amidotransferase type 1 family protein;	plastid			a	AT4G08280	Plastid
ATCG00130	ATPase, F0 complex, subunit B/B', bacterial/chloroplast;ATPase F subunit.	plastid		golgi:25900983;golgi:25900983;golgi:25900983;mitochondrion:27943495;plasma membrane:19334764;plasma membrane:22215637;plastid:14729914;plastid:15028209;plastid:15322131;plastid:21531424;plastid:23549413;plastid:23851315;plastid:23390424;plastid:24872594;plastid:18431481;plastid:18633119;plastid:20061580;plastid:23667806;plastid:24872594	a	AT2G02990	Secreted
ATCG00770	ribosomal protein S8;chloroplast 30S ribosomal protein S8	plastid		golgi:25900983;golgi:25900983;golgi:25900983;golgi:25900983;golgi:25900983;nucleus:23396599;plasma membrane:19334764;plastid:20423899;plastid:21531424;plastid:23851315;plastid:20061580;plastid:24872594;plastid:18431481;plastid:20061580;plastid:23549413;plastid:24361574;plastid:24872594;plastid:23667806;vacuole:25900983	a	AT4G20430	Secreted
