# Supplementary material for: The boundary of life and death: changes in mitochondrial and cytosolic proteomes associated with programmed cell death of Arabidopsis thaliana suspension culture cells
Source: Front Plant Sci. 2023 Aug 1;14:1194866. doi: 10.3389/fpls.2023.1194866 (PMC10431908; doi:10.3389/fpls.2023.1194866)
Supplement: Supplementary file 4 [file Table_3.xlsx]

## Sheet: Overview
Supplemental Table S3: Proteins showing significant differences in abundance in mitochondrial and cytosolic fractions following the heat shock, with/without LaCl3 treatment.
Tab colours				Example
Blue: Cytosolic, Yellow: Mitochondrial				e.g. C - Crt vs La
Cytosolic	FDR 0.05			C → Fraction, either C for cytosolic or M for mitochondrial
Mitochondrial	FDR 0.05
				Crt vs La → Comparison between treatments
				Crt: Control, La: 750µM LaCl3, HS: Heat shock (10min, 54°C), HS_La: HS and LaCl3
Double-check with Jim
Columns			Description
-Log(P-value)			All values are log2(x) transformed to improve linearity between independent samples / Likelyhood of a real difference in protein abundance caused by the treatments and not by change
Difference			Difference of the average intensity between the treatments
Fasta headers			Based on TAIR11 reference genome
Protein IDs			All possible protein identities based on the detected peptides
Majority protein IDs			Majority protein identities
Peptides			Total count number of distinct protein sequences identified in this protein group
Razor + unique peptides			Total number of unique and razor peptides (peptides that has been assigned to the largest protein group besides possibly fitting into a multiple protein groups)
Unique peptides			Number of peptide sequences that only appear in respective protein group
Sequence coverage [%]
Unique + razor sequence coverage [%]
Unique sequence coverage [%]
Mol. weight [kDa]			Molecular weight
Q-value			Minimal false discovery rate at which the identification is considered correct
Score			Sum of the ion scores of all peptides that were identified
Intensity			Protein intensity normalised across all samples
MS/MS count			Abundance of the protein in the sample
LFQ intensities			Untargeted label-free quantification (LFQ), relative amount of proteins per sample

## Sheet: C - Crt vs La
FDR 0.05 - Cytosolic - Ctr vs LaCl3
No significantly altered proteins

## Sheet: C - Crt vs HS
FDR 0.05 - Cytosolic - Ctr vs HS
																	LFQ intensities
-Log(P-value)	Difference	Fasta headers	Protein IDs	Majority protein IDs		Peptides	Razor + unique peptides	Unique peptides	Sequence coverage [%]	Unique + razor sequence coverage [%]	Unique sequence coverage [%]	Mol. weight [kDa]	Q-value	Score	Intensity	MS/MS count	Cyto_Cont_1	Cyto_Cont_2	Cyto_Cont_3	Cyto_Cont_4	Cyto_HS_1_rerun	Cyto_HS_2	Cyto_HS_4	Cyto_HS_5
6.07848	4.84466	AT1G48030.1 | Symbols: mtLPD1 | mitochondrial lipoamide dehydrogenase 1 | chr1:17717432-17719141 REVERSE LENGTH=507;AT1G48030.2 | Symbols: mtLPD1 | mitochondrial lipoamide dehydrogenase 1 | chr1:17717432-17719141 REVERSE LENGTH=507	AT1G48030.1;AT1G48030.2;AT3G17240.2	AT1G48030.1;AT1G48030.2		47	35	35	81.3	71.2	71.2	53.987	0	323.31	28867000000	599	21.4571	20.6722	20.9008	21.4598	25.9563	25.6229	26.1463	26.143
5.89434	4.72825	AT1G22450.1 | Symbols: COX6B, ATCOX6B2 | cytochrome C oxidase 6B | chr1:7925447-7926918 FORWARD LENGTH=191	AT1G22450.1	AT1G22450.1		8	8	8	51.3	51.3	51.3	21.195	0	207.94	3845700000	120	20.9162	20.7361	21.0756	20.9741	26.1668	25.6875	25.0268	25.7338
6.45827	4.64924	AT5G07440.1 | Symbols: GDH2 | glutamate dehydrogenase 2 | chr5:2356153-2358012 FORWARD LENGTH=411;AT5G07440.2 | Symbols: GDH2 | glutamate dehydrogenase 2 | chr5:2356153-2358012 FORWARD LENGTH=411;AT5G07440.3 | Symbols: GDH2 | glutamate dehydrogenase 2 | ch	AT5G07440.1;AT5G07440.2;AT5G07440.3	AT5G07440.1;AT5G07440.2;AT5G07440.3		35	27	26	79.6	71	65.7	44.699	0	323.31	23741000000	505	21.4255	21.6289	21.1344	22.0272	26.3091	26.0675	26.2143	26.222
4.92915	4.46646	AT5G55070.1 | Symbols: | Dihydrolipoamide succinyltransferase | chr5:22347637-22350409 FORWARD LENGTH=464	AT5G55070.1	AT5G55070.1		27	27	13	42	42	21.3	50.133	0	323.31	17346000000	363	21.0672	21.0806	20.9327	22.2366	25.6563	25.4951	25.8424	26.1891
7.2373	4.45711	AT1G51650.1 | Symbols: | ATP synthase epsilon chain, mitochondrial | chr1:19152680-19153641 FORWARD LENGTH=70	AT1G51650.1	AT1G51650.1		6	6	6	90	90	90	7.8319	0	216.97	13575000000	210	20.7992	20.6609	21.0824	20.945	25.3099	25.2741	25.119	25.6131
5.53163	4.32907	AT4G35260.1 | Symbols: IDH1, IDH-I | isocitrate dehydrogenase 1 | chr4:16774494-16776233 REVERSE LENGTH=367	AT4G35260.1;AT4G35650.1;AT1G32480.1	AT4G35260.1		34	34	21	54.8	54.8	40.1	39.626	0	323.31	19083000000	553	20.6132	20.8908	21.1245	20.687	24.5463	25.0924	25.3541	25.639
6.22963	4.30843	AT1G20010.1 | Symbols: TUB5 | tubulin beta-5 chain | chr1:6938033-6940481 REVERSE LENGTH=449	AT1G20010.1;CON__ENSEMBL:ENSBTAP00000025008	AT1G20010.1		34	7	7	78.6	19.6	19.6	50.342	0	47.846	661520000	31	20.8667	21.0929	20.982	20.9486	25.8223	25.1267	25.2384	24.9365
8.04895	4.30011	AT2G40300.1 | Symbols: ATFER4, FER4 | ferritin 4 | chr2:16831501-16833214 REVERSE LENGTH=259	AT2G40300.1	AT2G40300.1		12	11	11	52.5	48.6	48.6	29.029	0	101.12	995810000	65	20.6906	20.9103	20.9902	20.7276	25.0866	25.01	25.1067	25.3159
6.23869	4.29597	AT2G44350.2 | Symbols: ATCS, CSY4 | Citrate synthase family protein | chr2:18316673-18320524 FORWARD LENGTH=474;AT2G44350.1 | Symbols: ATCS, CSY4 | Citrate synthase family protein | chr2:18316673-18320524 FORWARD LENGTH=473	AT2G44350.2;AT2G44350.1;AT3G60100.1	AT2G44350.2;AT2G44350.1		43	43	43	75.3	75.3	75.3	52.782	0	323.31	41630000000	834	22.3149	22.4068	22.3872	23.051	27.0219	26.5761	26.8691	26.8765
4.23756	4.28999	AT4G26970.1 | Symbols: ACO2 | aconitase 2 | chr4:13543077-13548427 FORWARD LENGTH=995	AT4G26970.1;AT5G54950.1	AT4G26970.1		72	70	70	65.8	65.8	65.8	108.48	0	323.31	27501000000	998	21.0286	20.6849	19.7385	21.7603	25.1886	24.8634	25.0538	25.2665
9.07794	4.28015	AT2G20690.1 | Symbols: | lumazine-binding family protein | chr2:8923342-8924621 FORWARD LENGTH=271	AT2G20690.1	AT2G20690.1		7	7	7	31	31	31	29.639	0	67.704	1028800000	50	20.7222	20.6827	20.7948	20.8682	25.1887	24.9479	25.0231	25.0288
3.8799	4.25207	AT2G33210.2 | Symbols: HSP60-2 | heat shock protein 60-2 | chr2:14075093-14078568 REVERSE LENGTH=580;AT2G33210.1 | Symbols: HSP60-2 | heat shock protein 60-2 | chr2:14075093-14078568 REVERSE LENGTH=585	AT2G33210.2;AT2G33210.1	AT2G33210.2;AT2G33210.1		70	52	52	83.3	75.7	75.7	61.477	0	323.31	38857000000	856	21.1869	21.8185	20.1947	22.4681	25.5403	25.5018	25.8029	25.8314
2.68512	4.20176	AT3G56090.1 | Symbols: ATFER3, FER3 | ferritin 3 | chr3:20814350-20815984 REVERSE LENGTH=259	AT3G56090.1	AT3G56090.1		18	18	16	62.2	62.2	62.2	28.836	0	202.77	3973800000	139	23.9567	20.6628	21.2784	23.4467	26.2376	26.5479	26.7044	26.6618
3.38566	4.10991	AT3G13930.1 | Symbols: | Dihydrolipoamide acetyltransferase, long form protein | chr3:4596240-4600143 FORWARD LENGTH=539	AT3G13930.1	AT3G13930.1		41	41	33	61.8	61.8	56	58.467	0	323.31	18487000000	546	20.6098	19.5058	20.7918	22.2591	24.8525	24.5305	25.0008	25.2224
4.14023	4.06113	AT2G41220.1 | Symbols: GLU2 | glutamate synthase 2 | chr2:17177934-17188388 FORWARD LENGTH=1629	AT2G41220.1	AT2G41220.1		56	56	51	49.8	49.8	44.3	177.75	0	323.31	3406100000	343	21.0916	19.9448	21.0497	19.5418	24.7657	24.3596	24.6724	24.0748
4.11449	4.05443	AT3G01910.1 | Symbols: SOX, AT-SO, AtSO | sulfite oxidase | chr3:314919-317274 REVERSE LENGTH=393;AT3G01910.2 | Symbols: SOX, AT-SO, AtSO | sulfite oxidase | chr3:314919-316641 REVERSE LENGTH=298	AT3G01910.1;AT3G01910.2;AT3G01910.3	AT3G01910.1;AT3G01910.2		33	33	33	81.7	81.7	81.7	43.329	0	323.31	8309300000	337	19.8802	21.3757	21.3266	20.0789	24.9253	24.4478	24.4718	25.0341
4.47008	4.04526	AT4G35090.1 | Symbols: CAT2 | catalase 2 | chr4:16700937-16703215 REVERSE LENGTH=492;AT4G35090.2 | Symbols: CAT2 | catalase 2 | chr4:16701105-16703215 REVERSE LENGTH=474	AT4G35090.1;AT4G35090.2	AT4G35090.1;AT4G35090.2		38	19	19	73.6	44.1	44.1	56.931	0	323.31	7030800000	272	20.9457	20.6328	20.7314	21.3932	24.066	25.1114	25.0754	25.6314
6.4806	3.98788	AT3G13860.1 | Symbols: HSP60-3A | heat shock protein 60-3A | chr3:4561704-4565133 REVERSE LENGTH=572	AT3G13860.1	AT3G13860.1		66	66	66	87.2	87.2	87.2	60.466	0	323.31	23155000000	804	21.0397	20.6504	20.9113	20.9656	24.8768	24.4927	25.1621	24.9869
3.92976	3.95907	AT5G10860.1 | Symbols: | Cystathionine beta-synthase (CBS) family protein | chr5:3429173-3430142 REVERSE LENGTH=206	AT5G10860.1	AT5G10860.1		20	20	20	74.3	74.3	74.3	22.729	0	323.31	18193000000	381	21.015	21.5503	21.7666	23.0659	25.8475	25.5011	25.87	26.0155
4.06341	3.95351	AT1G31230.1 | Symbols: AK-HSDH I, AK-HSDH | aspartate kinase-homoserine dehydrogenase i | chr1:11158744-11163055 REVERSE LENGTH=911	AT1G31230.1	AT1G31230.1		39	39	33	57.5	57.5	50.4	99.403	0	323.31	2842800000	325	19.7673	21.6715	20.7776	20.8538	25.0307	24.8841	24.2611	24.7085
4.11771	3.93377	AT3G10920.1 | Symbols: MSD1, MEE33, ATMSD1 | manganese superoxide dismutase 1 | chr3:3418015-3419581 FORWARD LENGTH=231;AT3G10920.2 | Symbols: MSD1 | manganese superoxide dismutase 1 | chr3:3418015-3419581 FORWARD LENGTH=230	AT3G10920.1;AT3G10920.2	AT3G10920.1;AT3G10920.2		18	18	18	66.2	66.2	66.2	25.444	0	323.31	16367000000	330	20.8521	20.9072	21.1553	22.5118	25.4788	24.8949	25.4114	25.3764
7.54093	3.87287	AT1G67280.1 | Symbols: | Glyoxalase/Bleomycin resistance protein/Dioxygenase superfamily protein | chr1:25188563-25190547 REVERSE LENGTH=350;AT1G67280.2 | Symbols: | Glyoxalase/Bleomycin resistance protein/Dioxygenase superfamily protein | chr1:25188563-	AT1G67280.1;AT1G67280.2	AT1G67280.1;AT1G67280.2		13	11	11	38.6	36.6	36.6	39.167	0	63.778	605310000	39	20.9043	20.5718	21.0679	20.8473	24.7641	24.6616	24.6917	24.7653
6.05756	3.87223	AT5G14780.1 | Symbols: FDH | formate dehydrogenase | chr5:4777043-4779190 FORWARD LENGTH=384	AT5G14780.1	AT5G14780.1		28	28	28	64.1	64.1	64.1	42.409	0	323.31	9931300000	330	20.8404	20.814	20.8664	20.9996	24.6506	24.3204	24.8344	25.204
5.4691	3.86345	AT5G67360.1 | Symbols: ARA12 | Subtilase family protein | chr5:26872192-26874465 REVERSE LENGTH=757	AT5G67360.1	AT5G67360.1		14	14	14	29.9	29.9	29.9	79.414	0	247.26	1352700000	101	21.0006	20.7535	20.9423	20.937	25.3991	24.6131	24.3017	24.7732
5.07745	3.858	AT2G30970.2 | Symbols: ASP1 | aspartate aminotransferase 1 | chr2:13179012-13181686 FORWARD LENGTH=430;AT2G30970.1 | Symbols: ASP1 | aspartate aminotransferase 1 | chr2:13179012-13181686 FORWARD LENGTH=430	AT2G30970.2;AT2G30970.1	AT2G30970.2;AT2G30970.1		42	42	42	87.4	87.4	87.4	47.757	0	323.31	14519000000	501	21.0406	21.0686	20.8932	22.0125	25.164	24.841	25.1003	25.3417
2.12361	3.82746	AT1G69510.3 | Symbols: | cAMP-regulated phosphoprotein 19-related protein | chr1:26126779-26127725 FORWARD LENGTH=137;AT1G69510.2 | Symbols: | cAMP-regulated phosphoprotein 19-related protein | chr1:26126779-26127725 FORWARD LENGTH=137;AT1G69510.1 | Symb	AT1G69510.3;AT1G69510.2;AT1G69510.1	AT1G69510.3;AT1G69510.2;AT1G69510.1		10	10	9	72.3	72.3	65.7	15.096	0	53.186	1217400000	44	20.8661	24.8112	20.8936	21.1259	25.4768	25.8809	25.8422	25.8068
7.32966	3.81765	AT1G08490.1 | Symbols: ATSUFS, SUFS, ATCPNIFS, ATNFS2, CPNIFS | chloroplastic NIFS-like cysteine desulfurase | chr1:2685980-2688547 REVERSE LENGTH=463	AT1G08490.1	AT1G08490.1		13	13	13	43.8	43.8	43.8	50.485	0	95.415	1169500000	82	21.0079	20.8299	20.9773	20.9849	24.9362	24.601	24.5671	24.9662
4.2381	3.79551	AT4G18360.1 | Symbols: | Aldolase-type TIM barrel family protein | chr4:10146141-10148386 REVERSE LENGTH=368;AT4G18360.2 | Symbols: | Aldolase-type TIM barrel family protein | chr4:10146627-10148386 REVERSE LENGTH=314	AT4G18360.1;AT4G18360.2	AT4G18360.1;AT4G18360.2		25	25	21	66.3	66.3	60.6	40.481	0	323.31	6712300000	275	21.0054	22.2822	21.1373	20.5187	24.9234	24.9109	25.1053	25.186
4.99935	3.78774	AT2G47510.2 | Symbols: FUM1 | fumarase 1 | chr2:19498614-19502020 FORWARD LENGTH=492;AT2G47510.1 | Symbols: FUM1 | fumarase 1 | chr2:19498614-19502020 FORWARD LENGTH=492	AT2G47510.2;AT2G47510.1;AT5G50950.2;AT5G50950.1;AT5G50950.3	AT2G47510.2;AT2G47510.1		31	31	31	65.2	65.2	65.2	52.999	0	323.31	15285000000	448	20.9295	21.0133	20.7829	21.9358	25.1203	24.6689	25.0521	24.971
5.3118	3.71226	AT2G33040.1 | Symbols: ATP3 | gamma subunit of Mt ATP synthase | chr2:14018978-14021047 REVERSE LENGTH=325	AT2G33040.1	AT2G33040.1		26	26	26	60.3	60.3	60.3	35.448	0	323.31	24030000000	439	20.7201	20.5843	21.1392	20.7181	23.9318	24.5445	24.5907	24.9437
4.7002	3.70324	AT2G45440.1 | Symbols: DHDPS2 | dihydrodipicolinate synthase | chr2:18731294-18732867 FORWARD LENGTH=365	AT2G45440.1	AT2G45440.1		20	20	16	57.8	57.8	52.9	40.292	0	320.69	2475900000	143	21.9902	22.4176	21.1331	21.7288	25.8535	25.3343	25.2095	25.6854
7.99847	3.69131	AT1G06290.1 | Symbols: ACX3, ATACX3 | acyl-CoA oxidase 3 | chr1:1922423-1926002 FORWARD LENGTH=675	AT1G06290.1	AT1G06290.1		41	41	26	56.7	56.7	40.9	75.675	0	323.31	5158600000	344	20.9075	20.9107	21.0894	20.9102	24.8155	24.6053	24.4721	24.6902
4.77144	3.66431	AT5G23140.1 | Symbols: CLPP2, NCLPP7 | nuclear-encoded CLP protease P7 | chr5:7783811-7784826 FORWARD LENGTH=241	AT5G23140.1	AT5G23140.1		13	13	13	53.5	53.5	53.5	26.283	0	304.55	6345100000	204	20.6112	21.9477	21.1835	21.0363	25.0721	24.6943	24.6857	24.9838
5.33226	3.64871	AT1G65290.1 | Symbols: mtACP2 | mitochondrial acyl carrier protein 2 | chr1:24249088-24250366 REVERSE LENGTH=126	AT1G65290.1	AT1G65290.1		5	5	5	24.6	24.6	24.6	14.167	0	168.88	4864900000	96	20.8605	20.6188	20.9189	20.9485	24.9933	24.1182	24.7309	24.0992
1.95439	3.62506	AT1G60690.1 | Symbols: | NAD(P)-linked oxidoreductase superfamily protein | chr1:22349892-22351668 REVERSE LENGTH=345	AT1G60690.1	AT1G60690.1		10	4	3	31.6	13.3	10.7	38.16	0	31.012	739700000	43	20.8876	20.9086	21.0556	24.9261	25.6616	25.4164	25.8596	25.3406
7.2242	3.62375	AT5G63400.1 | Symbols: ADK1 | adenylate kinase 1 | chr5:25393274-25394817 REVERSE LENGTH=246;AT5G63400.2 | Symbols: ADK1 | adenylate kinase 1 | chr5:25393502-25394817 REVERSE LENGTH=190	AT5G63400.1;AT5G63400.2	AT5G63400.1;AT5G63400.2		28	28	25	87.4	87.4	79.3	26.932	0	323.31	23946000000	546	20.8574	20.7695	20.5987	21.0507	24.6184	24.4408	24.3588	24.3533
4.19303	3.6032	AT2G21870.1 | Symbols: MGP1 | copper ion binding;cobalt ion binding;zinc ion binding | chr2:9320456-9322618 REVERSE LENGTH=240;AT2G21870.2 | Symbols: MGP1 | copper ion binding;cobalt ion binding;zinc ion binding | chr2:9320612-9322618 REVERSE LENGTH=220	AT2G21870.1;AT2G21870.2	AT2G21870.1;AT2G21870.2		41	41	41	82.1	82.1	82.1	27.597	0	323.31	49149000000	800	21.0955	21.0793	21.1593	22.4259	24.7916	24.7369	25.2888	25.3556
3.85586	3.57526	AT5G03290.1 | Symbols: IDH-V | isocitrate dehydrogenase V | chr5:794043-795939 FORWARD LENGTH=374	AT5G03290.1	AT5G03290.1		32	32	18	63.6	63.6	47.3	40.624	0	323.31	14880000000	479	21.0783	21.2308	19.7828	21.5599	24.1432	24.3331	24.7478	24.7288
1.59576	3.57504	AT4G00810.2 | Symbols: | 60S acidic ribosomal protein family | chr4:346179-346957 REVERSE LENGTH=113;AT4G00810.1 | Symbols: | 60S acidic ribosomal protein family | chr4:346179-346957 REVERSE LENGTH=113	AT4G00810.2;AT4G00810.1	AT4G00810.2;AT4G00810.1		5	4	4	67.3	51.3	51.3	11.307	0	86.948	1771500000	58	25.5639	20.6783	20.948	20.8538	24.9064	25.6287	25.8995	25.9096
8.38749	3.55044	AT3G27890.1 | Symbols: NQR | NADPH:quinone oxidoreductase | chr3:10350807-10351938 REVERSE LENGTH=196	AT3G27890.1	AT3G27890.1		5	5	5	26	26	26	21.556	0	75.104	583650000	37	20.8552	20.9947	21.0545	20.9837	24.6643	24.547	24.4835	24.3951
4.12119	3.54323	AT2G44530.2 | Symbols: | Phosphoribosyltransferase family protein | chr2:18383732-18385974 FORWARD LENGTH=393;AT2G44530.1 | Symbols: | Phosphoribosyltransferase family protein | chr2:18383732-18385974 FORWARD LENGTH=394	AT2G44530.2;AT2G44530.1	AT2G44530.2;AT2G44530.1		22	22	12	63.6	63.6	48.9	42.496	0	323.31	3477900000	254	20.7659	22.1559	20.9251	21.968	25.1882	24.8541	24.7647	25.1809
3.67035	3.51365	AT3G56460.1 | Symbols: | GroES-like zinc-binding alcohol dehydrogenase family protein | chr3:20933029-20934425 REVERSE LENGTH=348	AT3G56460.1	AT3G56460.1		27	27	27	61.8	61.8	61.8	37.265	0	323.31	6933800000	289	21.396	22.73	21.3387	21.0327	24.5734	25.5909	24.9495	25.4382
4.16383	3.44835	AT5G45390.1 | Symbols: CLPP4, NCLPP4 | CLP protease P4 | chr5:18396351-18397586 FORWARD LENGTH=292	AT5G45390.1	AT5G45390.1		13	13	13	54.1	54.1	54.1	31.498	0	81.27	1500200000	127	21.0076	20.7071	21.2401	22.249	24.6515	25.1019	24.5646	24.6791
5.39987	3.44624	AT2G35605.1 | Symbols: | SWIB/MDM2 domain superfamily protein | chr2:14946161-14947027 FORWARD LENGTH=109	AT2G35605.1	AT2G35605.1		11	11	11	68.8	68.8	68.8	11.951	0	196.93	5227100000	122	20.6767	21.0424	20.9029	21.0654	23.8061	24.416	24.7263	24.5238
3.9984	3.42875	AT2G29630.3 | Symbols: THIC | thiaminC | chr2:12667395-12669569 FORWARD LENGTH=644;AT2G29630.2 | Symbols: THIC | thiaminC | chr2:12667395-12669569 FORWARD LENGTH=644;AT2G29630.1 | Symbols: PY, THIC | thiaminC | chr2:12667395-12669569 FORWARD LENGTH=644	AT2G29630.3;AT2G29630.2;AT2G29630.1	AT2G29630.3;AT2G29630.2;AT2G29630.1		24	24	24	51.1	51.1	51.1	71.986	0	242.96	1441600000	154	20.729	20.7348	21.4229	22.0956	24.9972	24.1843	24.9482	24.5676
6.79803	3.42331	AT3G53900.1 | Symbols: UPP, PYRR | uracil phosphoribosyltransferase | chr3:19956914-19958699 REVERSE LENGTH=231;AT3G53900.2 | Symbols: UPP, PYRR | uracil phosphoribosyltransferase | chr3:19956914-19959006 REVERSE LENGTH=296	AT3G53900.1;AT3G53900.2	AT3G53900.1;AT3G53900.2		19	19	19	71.9	71.9	71.9	25.161	0	88.274	1409600000	111	21.067	21.1195	21.0338	21.1881	24.8369	24.4601	24.2552	24.5495
7.22454	3.41779	AT4G17040.1 | Symbols: CLPR4 | CLP protease R subunit 4 | chr4:9586740-9589297 REVERSE LENGTH=305	AT4G17040.1	AT4G17040.1		7	7	7	22	22	22	33.44	0	92.798	771150000	68	20.9627	20.7977	21.1289	20.8172	24.4586	24.1382	24.3425	24.4383
4.59725	3.39794	AT1G62640.2 | Symbols: KAS III | 3-ketoacyl-acyl carrier protein synthase III | chr1:23192502-23194737 FORWARD LENGTH=404;AT1G62640.1 | Symbols: KAS III | 3-ketoacyl-acyl carrier protein synthase III | chr1:23192502-23194737 FORWARD LENGTH=404	AT1G62640.2;AT1G62640.1	AT1G62640.2;AT1G62640.1		13	13	13	40.3	40.3	40.3	42.846	0	323.31	1379100000	129	20.8292	21.0258	21.1599	22.1028	24.611	24.759	24.8532	24.4862
5.30869	3.39084	AT5G18170.1 | Symbols: GDH1 | glutamate dehydrogenase 1 | chr5:6006172-6008248 FORWARD LENGTH=411	AT5G18170.1	AT5G18170.1		50	50	31	81.3	81.3	59.1	44.524	0	323.31	85908000000	1028	24.611	24.9467	24.2651	24.8306	28.483	27.7191	27.9106	28.1041
5.74466	3.3844	AT4G05390.1 | Symbols: ATRFNR1, RFNR1 | root FNR 1 | chr4:2738839-2740483 REVERSE LENGTH=378;AT4G05390.2 | Symbols: RFNR1 | root FNR 1 | chr4:2738839-2740483 REVERSE LENGTH=350	AT4G05390.1;AT4G05390.2	AT4G05390.1;AT4G05390.2		16	9	9	50.3	34.7	34.7	42.396	0	82.922	477870000	37	21.0163	20.9531	21.1095	20.921	24.9295	24.2019	24.1912	24.2149
2.58821	3.33628	AT3G55010.2 | Symbols: ATPURM, PUR5 | phosphoribosylformylglycinamidine cyclo-ligase, chloroplast / phosphoribosyl-aminoimidazole synthetase / AIR synthase (PUR5) | chr3:20386818-20388549 FORWARD LENGTH=389;AT3G55010.1 | Symbols: ATPURM, PUR5 | phosphoribo	AT3G55010.2;AT3G55010.1	AT3G55010.2;AT3G55010.1		21	21	21	58.9	58.9	58.9	41.504	0	323.31	5567500000	283	23.0021	24.0526	21.2914	24.2105	26.3396	26.4253	26.5541	26.5826
3.19762	3.33521	AT5G52200.1 | Symbols: | phosphoprotein phosphatase inhibitors | chr5:21202818-21204719 REVERSE LENGTH=191;AT5G52200.2 | Symbols: | phosphoprotein phosphatase inhibitors | chr5:21202818-21204017 REVERSE LENGTH=211	AT5G52200.1;AT5G52200.2	AT5G52200.1;AT5G52200.2		7	7	7	47.1	47.1	47.1	21.097	0	182.54	581900000	34	20.8449	22.9647	21.1177	20.9049	25.0365	24.6868	24.8193	24.6305
3.16944	3.32562	AT1G79440.1 | Symbols: ALDH5F1, SSADH1, SSADH | aldehyde dehydrogenase 5F1 | chr1:29882525-29887275 REVERSE LENGTH=528	AT1G79440.1	AT1G79440.1		50	50	50	74.4	74.4	74.4	56.558	0	323.31	15642000000	659	20.8532	21.1126	21.2336	21.9599	23.3006	24.6493	25.2511	25.2608
4.23491	3.31743	AT3G48000.1 | Symbols: ALDH2B4, ALDH2, ALDH2A | aldehyde dehydrogenase 2B4 | chr3:17717082-17719843 REVERSE LENGTH=538	AT3G48000.1;AT1G23800.1	AT3G48000.1		29	29	29	44.6	44.6	44.6	58.588	0	323.31	6233700000	271	20.6869	20.8418	20.868	19.5686	23.9947	23.8155	23.4721	23.9528
4.96173	3.30245	AT3G54660.1 | Symbols: GR, EMB2360, ATGR2 | glutathione reductase | chr3:20230356-20233100 REVERSE LENGTH=565	AT3G54660.1	AT3G54660.1		20	20	20	51.7	51.7	51.7	60.852	0	141.52	1172800000	97	20.8826	20.7873	20.8193	21.3055	24.6178	24.4998	23.6484	24.2385
0.728906	3.28961	AT3G05020.1 | Symbols: ACP1, ACP | acyl carrier protein 1 | chr3:1391863-1392878 REVERSE LENGTH=137	AT3G05020.1	AT3G05020.1		5	5	5	27	27	27	15.055	0	67.177	4961200000	55	20.8455	20.8338	21.1336	21.0779	20.4457	20.443	28.2706	27.8899
6.09566	3.28405	AT4G33010.1 | Symbols: AtGLDP1, GLDP1 | glycine decarboxylase P-protein 1 | chr4:15926852-15931150 REVERSE LENGTH=1037;AT4G33010.2 | Symbols: AtGLDP1, GLDP1 | glycine decarboxylase P-protein 1 | chr4:15927133-15931150 REVERSE LENGTH=976	AT4G33010.1;AT4G33010.2	AT4G33010.1;AT4G33010.2		48	48	22	61.6	61.6	33.9	112.92	0	323.31	13221000000	514	20.7133	20.7642	20.9424	20.9692	24.184	23.978	23.8509	24.5124
4.05858	3.22603	AT3G52300.1 | Symbols: ATPQ | ATP synthase D chain, mitochondrial | chr3:19396689-19398119 FORWARD LENGTH=168;AT3G52300.2 | Symbols: ATPQ | ATP synthase D chain, mitochondrial | chr3:19396689-19397866 FORWARD LENGTH=122	AT3G52300.1;AT3G52300.2	AT3G52300.1;AT3G52300.2		38	38	38	96.4	96.4	96.4	19.586	0	323.31	43934000000	568	20.9256	20.8226	21.3769	21.9049	23.9627	24.1758	24.8705	24.9251
3.12652	3.2193	AT1G63940.1 | Symbols: MDAR6 | monodehydroascorbate reductase 6 | chr1:23730206-23733534 FORWARD LENGTH=486;AT1G63940.2 | Symbols: MDAR6 | monodehydroascorbate reductase 6 | chr1:23730095-23733534 FORWARD LENGTH=493;AT1G63940.4 | Symbols: MDAR6 | monodehyd	AT1G63940.1;AT1G63940.2;AT1G63940.4;AT1G63940.3	AT1G63940.1;AT1G63940.2;AT1G63940.4;AT1G63940.3		28	28	28	66.7	66.7	66.7	52.501	0	323.31	5848800000	300	21.9884	21.4439	21.0917	23.3998	25.1834	25.1384	25.3751	25.1041
2.74959	3.2164	AT4G01900.1 | Symbols: PII, GLB1 | GLNB1 homolog | chr4:821736-823294 FORWARD LENGTH=196	AT4G01900.1	AT4G01900.1		6	6	6	33.2	33.2	33.2	21.275	0	90.973	856570000	79	20.6927	20.4785	21.0383	23.0792	24.3083	24.5283	24.7421	24.5757
4.85609	3.21561	AT2G22970.1 | Symbols: SCPL11 | serine carboxypeptidase-like 11 | chr2:9774875-9778224 FORWARD LENGTH=433;AT2G22970.3 | Symbols: SCPL11 | serine carboxypeptidase-like 11 | chr2:9774875-9778255 FORWARD LENGTH=443;AT2G22970.2 | Symbols: SCPL11 | serine carbo	AT2G22970.1;AT2G22970.3;AT2G22970.2;AT2G22920.3;AT2G22920.1;AT2G22920.2	AT2G22970.1;AT2G22970.3;AT2G22970.2		8	8	8	35.8	35.8	35.8	49.232	0	97.291	448220000	41	20.8885	20.7083	21.1136	20.8038	24.6304	23.4929	24.2149	24.0385
3.3403	3.19855	AT5G14040.1 | Symbols: PHT3;1 | phosphate transporter 3;1 | chr5:4531059-4532965 REVERSE LENGTH=375	AT5G14040.1	AT5G14040.1		35	35	32	64.3	64.3	59.2	40.089	0	323.31	33642000000	522	20.8875	20.7389	20.9992	21.0111	22.7889	24.3884	24.3338	24.9197
4.901	3.19785	AT1G69370.1 | Symbols: CM3, cm-3 | chorismate mutase 3 | chr1:26080098-26081559 FORWARD LENGTH=316	AT1G69370.1	AT1G69370.1		12	12	12	43.4	43.4	43.4	36.57	0	109.32	693260000	71	20.6356	20.5666	21.1669	21.2314	23.9672	24.5964	23.798	24.0304
5.02755	3.19528	AT5G19760.1 | Symbols: | Mitochondrial substrate carrier family protein | chr5:6679591-6681845 REVERSE LENGTH=298	AT5G19760.1	AT5G19760.1		33	33	33	97.3	97.3	97.3	31.912	0	323.31	50890000000	618	21.1909	20.6009	20.9523	20.6539	23.6892	23.8278	24.1213	24.5407
7.15454	3.19199	AT4G16760.1 | Symbols: ACX1, ATACX1 | acyl-CoA oxidase 1 | chr4:9424930-9428689 REVERSE LENGTH=664;AT4G16760.2 | Symbols: ACX1 | acyl-CoA oxidase 1 | chr4:9424930-9428689 REVERSE LENGTH=651	AT4G16760.1;AT4G16760.2	AT4G16760.1;AT4G16760.2		35	35	32	61.7	61.7	53.8	74.301	0	323.31	4870700000	290	20.8834	20.7142	21.116	21.0435	24.0828	24.2758	24.102	24.0645
4.39428	3.18202	AT3G17240.3 | Symbols: mtLPD2 | lipoamide dehydrogenase 2 | chr3:5890278-5892166 REVERSE LENGTH=507;AT3G17240.1 | Symbols: mtLPD2 | lipoamide dehydrogenase 2 | chr3:5890278-5892166 REVERSE LENGTH=507	AT3G17240.3;AT3G17240.1	AT3G17240.3;AT3G17240.1		47	47	35	81.9	81.9	73.8	53.985	0	323.31	88348000000	1117	23.3535	23.9924	23.9483	24.7547	27.2701	26.9496	27.2537	27.3036
5.53341	3.17821	AT3G52200.1 | Symbols: LTA3 | Dihydrolipoamide acetyltransferase, long form protein | chr3:19360317-19366091 FORWARD LENGTH=637;AT3G52200.2 | Symbols: LTA3 | Dihydrolipoamide acetyltransferase, long form protein | chr3:19360317-19366091 FORWARD LENGTH=713	AT3G52200.1;AT3G52200.2	AT3G52200.1;AT3G52200.2		27	27	27	53.2	53.2	53.2	68.862	0	323.31	8950400000	349	20.6687	20.8297	21.0514	21.042	24.4123	23.7845	23.7957	24.3122
6.09487	3.15741	AT4G12060.1 | Symbols: | Double Clp-N motif protein | chr4:7228269-7229898 REVERSE LENGTH=241	AT4G12060.1	AT4G12060.1		7	7	7	41.5	41.5	41.5	26.56	0	29.111	680820000	49	20.754	21.2269	20.9451	20.9259	24.3985	24.0644	23.8415	24.1771
7.02757	3.12038	AT1G67090.1 | Symbols: RBCS1A | ribulose bisphosphate carboxylase small chain 1A | chr1:25048465-25049249 REVERSE LENGTH=180	AT1G67090.1;AT1G67090.2;AT5G38430.1;AT5G38420.1;AT5G38410.1;AT5G38410.2;AT5G38410.3	AT1G67090.1		8	8	8	50	50	50	20.216	0	67.771	993550000	74	21.0641	21.1656	20.8902	21.158	24.3928	24.1125	24.243	24.0111
4.67088	3.11444	AT3G23940.2 | Symbols: | dehydratase family | chr3:8648780-8652323 FORWARD LENGTH=606;AT3G23940.1 | Symbols: | dehydratase family | chr3:8648780-8652323 FORWARD LENGTH=608	AT3G23940.2;AT3G23940.1	AT3G23940.2;AT3G23940.1		39	39	39	61.7	61.7	61.7	64.713	0	323.31	9233100000	437	22.8758	23.632	23.0976	23.9562	26.7325	26.5326	26.3143	26.44
3.51684	3.10853	AT4G11010.1 | Symbols: NDPK3 | nucleoside diphosphate kinase 3 | chr4:6732780-6734298 REVERSE LENGTH=238	AT4G11010.1;AT4G23900.1;AT4G23895.3	AT4G11010.1		16	16	16	57.1	57.1	57.1	25.734	0	323.31	15237000000	333	23.9219	23.8538	23.105	24.824	27.1488	26.448	27.5371	27.0049
5.38805	3.10748	AT3G20330.1 | Symbols: PYRB | PYRIMIDINE B | chr3:7090354-7091904 REVERSE LENGTH=390	AT3G20330.1	AT3G20330.1		23	23	23	59.7	59.7	59.7	43.166	0	305.61	2290400000	183	22.0143	21.2698	21.2907	21.826	24.7993	24.8044	24.5826	24.6445
5.81187	3.10066	AT3G59760.3 | Symbols: OASC, ATCS-C | O-acetylserine (thiol) lyase isoform C | chr3:22072668-22075345 REVERSE LENGTH=430;AT3G59760.1 | Symbols: OASC, ATCS-C | O-acetylserine (thiol) lyase isoform C | chr3:22072119-22075345 REVERSE LENGTH=433;AT3G59760.2 |	AT3G59760.3;AT3G59760.1;AT3G59760.2	AT3G59760.3;AT3G59760.1;AT3G59760.2		36	33	33	74.2	71.4	71.4	45.814	0	323.31	10448000000	423	20.9329	21.0758	20.871	21.2397	24.2081	23.8642	23.9449	24.5048
4.15385	3.10039	AT3G60210.1 | Symbols: | GroES-like family protein | chr3:22251443-22252709 REVERSE LENGTH=138	AT3G60210.1	AT3G60210.1		8	7	7	53.6	53.6	53.6	15.14	0	75.757	1052500000	75	20.6261	20.4748	20.9307	21.0725	24.6747	23.8037	23.7406	23.2866
8.58587	3.09071	AT3G54050.2 | Symbols: HCEF1 | high cyclic electron flow 1 | chr3:20016951-20018527 FORWARD LENGTH=417;AT3G54050.1 | Symbols: HCEF1 | high cyclic electron flow 1 | chr3:20016951-20018527 FORWARD LENGTH=417	AT3G54050.2;AT3G54050.1	AT3G54050.2;AT3G54050.1		11	11	11	36	36	36	45.161	0	100.41	1003800000	86	21.0998	20.9426	21.1926	21.0251	24.1249	24.1991	24.1197	24.1793
4.2008	3.07969	AT3G23990.1 | Symbols: HSP60, HSP60-3B | heat shock protein 60 | chr3:8669013-8672278 FORWARD LENGTH=577	AT3G23990.1	AT3G23990.1		85	85	67	84.2	84.2	76.9	61.28	0	323.31	110400000000	1713	23.0276	24.0084	24.099	24.4018	27.1341	26.6963	26.9711	27.054
4.01048	3.07043	AT1G79750.1 | Symbols: ATNADP-ME4, NADP-ME4 | NADP-malic enzyme 4 | chr1:30007655-30011179 REVERSE LENGTH=646	AT1G79750.1	AT1G79750.1		27	25	24	63.6	62.4	62.4	71.16	0	307.21	2101800000	169	21.0547	20.8902	21.2968	22.1693	24.3644	24.5333	24.8278	23.9673
8.01443	3.02442	AT1G09130.1 | Symbols: | ATP-dependent caseinolytic (Clp) protease/crotonase family protein | chr1:2940063-2942217 REVERSE LENGTH=330;AT1G09130.2 | Symbols: | ATP-dependent caseinolytic (Clp) protease/crotonase family protein | chr1:2940063-2942217 REVER	AT1G09130.1;AT1G09130.2;AT1G09130.3	AT1G09130.1;AT1G09130.2;AT1G09130.3		10	10	10	42.7	42.7	42.7	36.307	0	86.367	955270000	86	20.9625	20.9775	21.1524	21.0744	24.1884	24.0893	24.056	23.9308
5.15644	3.01691	AT3G26720.1 | Symbols: | Glycosyl hydrolase family 38 protein | chr3:9816707-9823056 FORWARD LENGTH=1019;AT3G26720.2 | Symbols: | Glycosyl hydrolase family 38 protein | chr3:9816707-9822958 FORWARD LENGTH=943	AT3G26720.1;AT3G26720.2	AT3G26720.1;AT3G26720.2		29	29	29	42	42	42	115.22	0	323.31	1037800000	141	20.3281	21.0048	21.0334	20.9547	24.1089	23.8263	23.5169	23.9365
6.39278	3.00103	AT2G15570.1 | Symbols: ATHM3, ATM3, TRX-M3, GAT1 | Thioredoxin superfamily protein | chr2:6791556-6792902 REVERSE LENGTH=173;AT2G15570.2 | Symbols: ATHM3, ATM3, TRX-M3, GAT1 | Thioredoxin superfamily protein | chr2:6791556-6792902 REVERSE LENGTH=174	AT2G15570.1;AT2G15570.2	AT2G15570.1;AT2G15570.2		8	8	8	49.7	49.7	49.7	19.5	0	118.87	720990000	62	21.059	20.7085	20.9485	20.8851	24.2118	23.7658	23.8566	23.7711
2.98038	3.00086	AT1G06570.1 | Symbols: PDS1, HPD | phytoene desaturation 1 | chr1:2012015-2013543 REVERSE LENGTH=473;AT1G06570.2 | Symbols: PDS1, HPD | phytoene desaturation 1 | chr1:2012173-2013543 REVERSE LENGTH=418	AT1G06570.1;AT1G06570.2	AT1G06570.1;AT1G06570.2		10	10	10	37	37	37	51.92	0	48.702	575830000	52	20.894	20.7824	22.9095	21.1363	24.1494	24.4505	24.5603	24.5655
2.83963	2.99967	AT3G16850.1 | Symbols: | Pectin lyase-like superfamily protein | chr3:5748692-5750981 FORWARD LENGTH=455	AT3G16850.1	AT3G16850.1		7	7	7	29.9	29.9	29.9	49.124	0	64.481	654800000	56	20.6653	22.9062	21.037	21.0446	24.9275	24.4824	24.118	24.1238
6.42491	2.97068	AT4G18440.1 | Symbols: | L-Aspartase-like family protein | chr4:10186385-10188832 REVERSE LENGTH=536	AT4G18440.1	AT4G18440.1		24	12	12	43.5	25.9	25.9	59.757	0	153.84	756040000	83	21.0683	20.8591	21.0399	20.861	24.0279	24.1953	23.7106	23.7773
5.09884	2.96661	AT4G31990.4 | Symbols: ASP5 | aspartate aminotransferase 5 | chr4:15471074-15473521 REVERSE LENGTH=448;AT4G31990.2 | Symbols: ASP5, AAT3, ATAAT1 | aspartate aminotransferase 5 | chr4:15471074-15473521 REVERSE LENGTH=453;AT4G31990.1 | Symbols: ASP5, AAT3, A	AT4G31990.4;AT4G31990.2;AT4G31990.1;AT4G31990.3	AT4G31990.4;AT4G31990.2;AT4G31990.1;AT4G31990.3		34	34	33	79.7	79.7	79.7	49.324	0	323.31	8435500000	390	23.314	24.2757	23.8479	23.6552	26.9293	26.6788	26.6546	26.6966
3.63836	2.96627	AT2G37690.1 | Symbols: | phosphoribosylaminoimidazole carboxylase, putative / AIR carboxylase, putative | chr2:15806111-15810240 FORWARD LENGTH=642	AT2G37690.1;AT2G05140.1	AT2G37690.1		28	28	28	59	59	59	69.751	0	323.31	3289500000	337	21.2758	21.8579	20.4363	22.1239	24.2438	24.3556	24.4085	24.551
4.28822	2.9469	AT1G72330.3 | Symbols: ALAAT2 | alanine aminotransferase 2 | chr1:27233637-27236571 FORWARD LENGTH=553;AT1G72330.1 | Symbols: ALAAT2 | alanine aminotransferase 2 | chr1:27233637-27236571 FORWARD LENGTH=540;AT1G72330.2 | Symbols: ALAAT2 | alanine aminotrans	AT1G72330.3;AT1G72330.1;AT1G72330.2	AT1G72330.3;AT1G72330.1;AT1G72330.2		31	31	24	55.5	55.5	51.9	61.031	0	323.31	3861300000	248	20.7147	21.9421	20.7873	21.0863	24.0782	23.9278	24.072	24.2399
6.3308	2.92295	AT3G10670.1 | Symbols: ATNAP7, NAP7 | non-intrinsic ABC protein 7 | chr3:3335325-3337304 REVERSE LENGTH=338	AT3G10670.1	AT3G10670.1		12	12	12	38.2	38.2	38.2	36.931	0	86.383	667230000	70	20.7121	20.6773	20.868	21.0541	23.9946	23.7975	23.5572	23.654
1.49717	2.91847	AT1G77440.2 | Symbols: PBC2 | 20S proteasome beta subunit C2 | chr1:29096020-29098105 FORWARD LENGTH=204;AT1G77440.1 | Symbols: PBC2 | 20S proteasome beta subunit C2 | chr1:29096334-29098105 FORWARD LENGTH=204	AT1G77440.2;AT1G77440.1	AT1G77440.2;AT1G77440.1		11	3	3	60.8	27	27	22.759	0	109.87	745870000	35	20.9151	20.7319	20.8401	20.8235	20.6219	25.0822	24.5259	24.7545
3.26246	2.91209	AT1G03680.1 | Symbols: ATHM1, TRX-M1, ATM1, THM1 | thioredoxin M-type 1 | chr1:916990-917865 REVERSE LENGTH=179	AT1G03680.1	AT1G03680.1		12	12	12	49.7	49.7	49.7	19.664	0	85.141	949860000	91	20.8981	20.9684	21.3646	22.7511	24.5491	24.4913	24.2669	24.3233
1.74999	2.90633	AT2G27510.1 | Symbols: ATFD3, FD3 | ferredoxin 3 | chr2:11758281-11758748 REVERSE LENGTH=155	AT2G27510.1	AT2G27510.1		5	5	5	60	60	60	16.633	0	323.31	4587500000	139	24.3951	24.8759	21.2347	24.1184	26.9605	26.8416	25.4805	26.9669
1.99311	2.90482	AT4G34290.1 | Symbols: | SWIB/MDM2 domain superfamily protein | chr4:16410883-16412122 FORWARD LENGTH=144	AT4G34290.1	AT4G34290.1		4	4	1	38.2	38.2	16	15.998	0	68.932	1545100000	82	23.4078	20.8574	21.2961	24.0458	25.5656	25.2532	25.2613	25.1462
2.2243	2.88668	AT3G02090.1 | Symbols: MPPBETA | Insulinase (Peptidase family M16) protein | chr3:365624-368526 FORWARD LENGTH=531;AT3G02090.2 | Symbols: MPPBETA | Insulinase (Peptidase family M16) protein | chr3:365624-368534 FORWARD LENGTH=535	AT3G02090.1;AT3G02090.2	AT3G02090.1;AT3G02090.2		44	44	44	74.2	74.2	74.2	59.159	0	323.31	83642000000	975	20.9384	21.3084	20.8813	23.3758	23.6401	24.1936	24.9993	25.2177
3.36799	2.8679	AT1G17290.1 | Symbols: AlaAT1 | alanine aminotransferas | chr1:5922771-5926093 FORWARD LENGTH=543	AT1G17290.1	AT1G17290.1		30	23	23	55.8	45.3	45.3	59.82	0	323.31	6225800000	314	22.5245	23.5463	22.078	21.7873	25.0883	25.5278	25.1326	25.6589
8.46151	2.8641	AT5G06290.1 | Symbols: 2-Cys Prx B, 2CPB | 2-cysteine peroxiredoxin B | chr5:1919380-1921211 FORWARD LENGTH=273	AT5G06290.1	AT5G06290.1		13	3	3	49.1	20.5	20.5	29.78	0	42.192	466750000	37	21.1425	20.9649	21.0803	21.1616	24.007	23.995	23.8624	23.9413
2.49206	2.84923	AT1G02560.1 | Symbols: CLPP5, NCLPP5, NCLPP1 | nuclear encoded CLP protease 5 | chr1:538000-539805 FORWARD LENGTH=298	AT1G02560.1	AT1G02560.1		7	7	7	31.9	31.9	31.9	32.356	0	323.31	2873700000	119	22.8739	23.0588	23.1065	20.6732	24.9465	25.2861	25.6032	25.2736
6.23704	2.84872	AT3G15640.2 | Symbols: | Rubredoxin-like superfamily protein | chr3:5299273-5301371 FORWARD LENGTH=175;AT3G15640.1 | Symbols: | Rubredoxin-like superfamily protein | chr3:5299273-5301371 FORWARD LENGTH=176	AT3G15640.2;AT3G15640.1	AT3G15640.2;AT3G15640.1		9	6	6	59.4	46.9	46.9	19.316	0	323.31	8274700000	142	20.6723	20.7946	21.0061	21.1585	23.8031	23.6125	23.934	23.6768
5.32562	2.84111	AT1G59900.1 | Symbols: AT-E1 ALPHA, E1 ALPHA | pyruvate dehydrogenase complex E1 alpha subunit | chr1:22051368-22053660 FORWARD LENGTH=389	AT1G59900.1	AT1G59900.1		36	36	29	65.6	65.6	55.8	43.059	0	323.31	18332000000	471	20.8847	21.5385	21.4506	21.5479	24.0478	24.173	24.0966	24.4688
3.62535	2.82807	AT5G14260.3 | Symbols: | Rubisco methyltransferase family protein | chr5:4601139-4603873 FORWARD LENGTH=514;AT5G14260.2 | Symbols: | Rubisco methyltransferase family protein | chr5:4601139-4603873 FORWARD LENGTH=514;AT5G14260.1 | Symbols: | Rubisco meth	AT5G14260.3;AT5G14260.2;AT5G14260.1	AT5G14260.3;AT5G14260.2;AT5G14260.1		18	18	18	46.3	46.3	46.3	57.585	0	298.66	1073900000	116	20.5124	20.5048	21.138	21.3712	22.9334	24.3047	23.9177	23.6828
3.9412	2.81941	AT2G21640.1 | Symbols: | Encodes a protein of unknown function that is a marker for oxidative stress response. | chr2:9254985-9255453 FORWARD LENGTH=104	AT2G21640.1	AT2G21640.1		10	10	10	93.3	93.3	93.3	11.696	0	123.46	2441200000	111	21.1363	20.8946	20.8411	20.9969	24.0962	23.7992	24.3378	22.9132
8.04161	2.81639	AT4G35460.1 | Symbols: ATNTRB, NTRB, NTR1 | NADPH-dependent thioredoxin reductase B | chr4:16842218-16843740 FORWARD LENGTH=375	AT4G35460.1	AT4G35460.1		20	11	11	62.4	45.9	45.9	39.626	0	155.15	1334800000	123	20.8462	20.901	20.9102	20.9723	23.8174	23.6137	23.8317	23.6323
5.862	2.78176	AT1G49970.1 | Symbols: CLPR1, NCLPP5, SVR2 | CLP protease proteolytic subunit 1 | chr1:18501936-18504462 REVERSE LENGTH=387	AT1G49970.1	AT1G49970.1		9	9	9	30.7	30.7	30.7	42.627	0	84.67	605280000	53	21.1037	20.8594	21.1379	21.0033	23.7761	23.5304	24.1681	23.7567
3.0968	2.77964	AT3G48170.1 | Symbols: ALDH10A9 | aldehyde dehydrogenase 10A9 | chr3:17786290-17789918 REVERSE LENGTH=503	AT3G48170.1	AT3G48170.1		29	29	29	70	70	70	54.918	0	323.31	8354200000	434	21.3927	22.6104	21.0254	22.7576	24.8865	24.628	24.4626	24.9276
5.10887	2.77455	AT3G57560.1 | Symbols: NAGK | N-acetyl-l-glutamate kinase | chr3:21311164-21312207 REVERSE LENGTH=347	AT3G57560.1	AT3G57560.1		18	18	18	55.3	55.3	55.3	36.595	0	323.31	4495300000	202	23.0222	23.8334	23.8198	23.5248	26.2162	26.2663	26.414	26.4018
6.19572	2.76456	AT5G19860.1 | Symbols: | Protein of unknown function, DUF538 | chr5:6714533-6715837 REVERSE LENGTH=181	AT5G19860.1	AT5G19860.1		6	6	6	37	37	37	20.443	0	79.557	400420000	36	20.8687	20.6779	20.7704	20.8311	23.2877	23.8375	23.432	23.6491
4.96134	2.75344	AT3G02720.1 | Symbols: | Class I glutamine amidotransferase-like superfamily protein | chr3:586336-588088 FORWARD LENGTH=388	AT3G02720.1	AT3G02720.1		10	10	10	45.1	45.1	45.1	41.645	0	132.19	512580000	66	20.8371	20.8483	21.0237	21.0205	23.1081	23.7345	23.9826	23.9182
5.9337	2.75312	AT3G16700.1 | Symbols: | Fumarylacetoacetate (FAA) hydrolase family | chr3:5687809-5689664 FORWARD LENGTH=224;AT3G16700.2 | Symbols: | Fumarylacetoacetate (FAA) hydrolase family | chr3:5687809-5689338 FORWARD LENGTH=170	AT3G16700.1;AT3G16700.2	AT3G16700.1;AT3G16700.2		11	11	9	50.9	50.9	41.5	24.416	0	213.89	2449600000	134	21.0921	21.1221	20.9514	21.1808	23.7191	23.5507	24.1626	23.9264
4.80448	2.75216	AT1G50510.1 | Symbols: | indigoidine synthase A family protein | chr1:18716578-18719060 FORWARD LENGTH=330	AT1G50510.1	AT1G50510.1		24	24	24	77	77	77	34.799	0	323.31	6436800000	288	21.2946	20.6847	21.2965	21.6309	23.9845	23.9326	23.7669	24.2313
6.37731	2.74818	AT5G23440.1 | Symbols: FTRA1 | ferredoxin/thioredoxin reductase subunit A (variable subunit) 1 | chr5:7903230-7903778 REVERSE LENGTH=182	AT5G23440.1	AT5G23440.1		7	7	7	43.4	43.4	43.4	19.824	0	34.584	607650000	49	21.1686	20.9937	21.0349	20.9885	23.873	24.0597	23.6992	23.5465
1.54799	2.74517	AT5G09590.1 | Symbols: MTHSC70-2, HSC70-5 | mitochondrial HSO70 2 | chr5:2975721-2978508 FORWARD LENGTH=682	AT5G09590.1;AT4G32208.1	AT5G09590.1		63	55	55	65.1	65.1	65.1	72.99	0	323.31	27520000000	868	21.0031	21.2425	18.556	23.0992	23.5059	23.4448	23.5932	24.3376
4.07943	2.72175	AT2G42790.1 | Symbols: CSY3 | citrate synthase 3 | chr2:17803132-17805991 REVERSE LENGTH=509	AT2G42790.1	AT2G42790.1		23	16	15	56	43.4	40.7	56.175	0	323.31	9281000000	313	20.9932	21.1762	21.6751	21.9372	23.6783	24.0977	24.3069	24.5858
4.88188	2.71862	AT2G38670.1 | Symbols: PECT1 | phosphorylethanolamine cytidylyltransferase 1 | chr2:16168979-16171680 FORWARD LENGTH=421	AT2G38670.1	AT2G38670.1		31	31	31	61	61	61	46.977	0	323.31	15139000000	444	20.9661	20.6618	20.9883	20.7254	23.1308	23.3605	23.7198	24.0048
3.91879	2.70717	ATCG00480.1 | Symbols: ATPB, PB | ATP synthase subunit beta | chrC:52660-54156 REVERSE LENGTH=498	ATCG00480.1	ATCG00480.1		41	39	39	76.7	73.9	73.9	53.933	0	323.31	14065000000	616	23.9109	24.1723	24.2694	25.1771	26.8253	26.9719	27.4702	27.091
4.34971	2.70649	AT3G51840.1 | Symbols: ACX4, ATSCX, ATG6 | acyl-CoA oxidase 4 | chr3:19225653-19229008 REVERSE LENGTH=436	AT3G51840.1	AT3G51840.1		21	21	21	62.2	62.2	62.2	47.556	0	323.31	3676300000	196	21.023	20.7923	21.2441	21.0642	23.1928	24.1327	23.469	24.1551
4.90175	2.70608	AT1G14980.1 | Symbols: CPN10 | chaperonin 10 | chr1:5165930-5166654 REVERSE LENGTH=98	AT1G14980.1	AT1G14980.1		22	22	22	96.9	96.9	96.9	10.812	0	323.31	338590000000	734	27.4654	27.8271	27.8831	28.3564	30.8225	30.3577	30.6477	30.5283
4.81279	2.70146	AT4G22930.1 | Symbols: PYR4, DHOASE | pyrimidin 4 | chr4:12019315-12021200 FORWARD LENGTH=377	AT4G22930.1	AT4G22930.1		10	10	10	39	39	39	41.949	0	110.07	514720000	45	20.9144	20.7247	21.2457	21.3258	23.6931	23.9048	23.3327	24.0859
3.5586	2.68132	AT5G16710.1 | Symbols: DHAR3 | dehydroascorbate reductase 1 | chr5:5483312-5484926 FORWARD LENGTH=258	AT5G16710.1	AT5G16710.1		16	16	16	73.6	73.6	73.6	28.514	0	70.55	1969700000	149	22.4824	22.0803	21.1347	21.0733	24.2221	24.4689	24.4433	24.3617
5.01437	2.68112	AT2G40490.1 | Symbols: HEME2 | Uroporphyrinogen decarboxylase | chr2:16912961-16914988 FORWARD LENGTH=394	AT2G40490.1	AT2G40490.1		14	14	14	47.7	47.7	47.7	43.579	0	141.24	1033900000	112	20.9287	21.704	20.9264	21.0658	23.6821	23.9975	23.8069	23.863
4.50103	2.67484	AT5G63620.1 | Symbols: | GroES-like zinc-binding alcohol dehydrogenase family protein | chr5:25466380-25468296 REVERSE LENGTH=427;AT5G63620.2 | Symbols: | GroES-like zinc-binding alcohol dehydrogenase family protein | chr5:25466380-25468296 REVERSE LENGT	AT5G63620.1;AT5G63620.2	AT5G63620.1;AT5G63620.2		16	16	16	42.6	42.6	42.6	45.497	0	323.31	3631800000	138	21.2419	20.5273	21.2484	20.998	23.6649	23.2701	23.6726	24.1074
5.68165	2.67379	AT3G45770.1 | Symbols: | Polyketide synthase, enoylreductase family protein | chr3:16805753-16807774 REVERSE LENGTH=375;AT3G45770.2 | Symbols: | Polyketide synthase, enoylreductase family protein | chr3:16805753-16807460 REVERSE LENGTH=297	AT3G45770.1;AT3G45770.2	AT3G45770.1;AT3G45770.2		17	17	17	52	52	52	40.823	0	211.79	2468600000	182	21.1652	20.6903	21.2232	20.8214	23.546	23.5157	23.6804	23.8533
5.44751	2.66815	AT2G45820.1 | Symbols: | Remorin family protein | chr2:18863147-18864576 REVERSE LENGTH=190	AT2G45820.1	AT2G45820.1		9	9	9	51.6	51.6	51.6	20.968	0	65.332	491880000	48	20.6822	20.7067	20.9923	20.8728	23.7344	23.2204	23.7416	23.2302
6.18867	2.66625	AT1G32380.1 | Symbols: PRS2 | phosphoribosyl pyrophosphate (PRPP) synthase 2 | chr1:11682033-11684229 FORWARD LENGTH=400	AT1G32380.1	AT1G32380.1		21	13	7	58.5	50.5	27.8	43.332	0	227.69	1251100000	126	20.9989	20.7409	21.0113	20.9323	23.4532	23.4252	23.579	23.891
1.53989	2.66463	AT5G47030.1 | Symbols: | ATPase, F1 complex, delta/epsilon subunit | chr5:19090384-19092034 FORWARD LENGTH=203	AT5G47030.1	AT5G47030.1		11	11	11	78.3	78.3	78.3	21.547	0	271.67	25238000000	248	20.6953	20.8353	23.4116	23.8374	23.9284	25.1739	24.4629	25.873
4.00259	2.65039	AT5G67500.1 | Symbols: VDAC2, ATVDAC2 | voltage dependent anion channel 2 | chr5:26935223-26937123 FORWARD LENGTH=276	AT5G67500.1	AT5G67500.1		36	36	5	97.5	97.5	11.6	29.594	0	323.31	28271000000	549	21.6302	20.782	20.8785	21.8194	23.9347	23.7942	23.699	24.2838
2.41747	2.64619	AT3G63170.1 | Symbols: | Chalcone-flavanone isomerase family protein | chr3:23334675-23335993 FORWARD LENGTH=279	AT3G63170.1	AT3G63170.1		13	13	13	54.5	54.5	54.5	30.394	0	244.18	1337600000	126	20.8921	22.572	21.3736	23.4317	24.7698	24.779	24.7865	24.5189
4.65674	2.63812	AT3G13580.3 | Symbols: | Ribosomal protein L30/L7 family protein | chr3:4433809-4435109 FORWARD LENGTH=244;AT3G13580.2 | Symbols: | Ribosomal protein L30/L7 family protein | chr3:4433809-4435109 FORWARD LENGTH=244;AT3G13580.1 | Symbols: | Ribosomal prot	AT3G13580.3;AT3G13580.2;AT3G13580.1	AT3G13580.3;AT3G13580.2;AT3G13580.1		23	4	4	64.8	21.3	21.3	28.433	0	55.158	396000000	35	21.4434	20.8692	20.7803	20.5951	23.9213	23.3557	23.554	23.4094
5.24471	2.63807	AT4G15940.1 | Symbols: | Fumarylacetoacetate (FAA) hydrolase family | chr4:9038361-9040163 FORWARD LENGTH=222	AT4G15940.1	AT4G15940.1		10	8	8	45.5	36	36	24.154	0	195.55	2388000000	109	21.2308	21.0479	21.1148	21.3336	23.5808	23.5762	23.8442	24.278
1.68527	2.63733	AT2G18230.1 | Symbols: AtPPa2, PPa2 | pyrophosphorylase 2 | chr2:7932139-7933560 REVERSE LENGTH=218	AT2G18230.1	AT2G18230.1		9	7	7	55.5	50.5	50.5	24.671	0	105.87	1307700000	58	24.0178	23.8611	21.0023	21.0246	25.1766	25.0333	25.0966	25.1486
2.4015	2.63289	AT4G03520.1 | Symbols: ATHM2 | Thioredoxin superfamily protein | chr4:1562585-1564055 REVERSE LENGTH=186;AT4G03520.2 | Symbols: ATHM2 | Thioredoxin superfamily protein | chr4:1562585-1562803 REVERSE LENGTH=72	AT4G03520.1;AT4G03520.2	AT4G03520.1;AT4G03520.2		11	11	11	48.4	48.4	48.4	20.312	0	185.04	1957500000	111	22.9258	23.159	20.9295	23.4348	25.5656	25.2078	25.0818	25.1255
4.89012	2.63278	AT1G54340.1 | Symbols: ICDH | isocitrate dehydrogenase | chr1:20283520-20286506 FORWARD LENGTH=416	AT1G54340.1	AT1G54340.1		31	24	24	63.5	52.9	52.9	47.234	0	309.29	1691500000	157	21.1754	20.7603	20.8317	20.9044	23.8033	23.6897	23.012	23.698
6.41688	2.62236	AT4G21105.2 | Symbols: | cytochrome-c oxidases;electron carriers | chr4:11266273-11266866 FORWARD LENGTH=48;AT4G21105.1 | Symbols: | cytochrome-c oxidases;electron carriers | chr4:11266273-11266724 FORWARD LENGTH=68	AT4G21105.2;AT4G21105.1	AT4G21105.2;AT4G21105.1		4	4	4	39.6	39.6	39.6	5.7047	0	114.43	7301200000	79	21.1512	21.08	21.1691	20.8451	23.864	23.4783	23.6382	23.7543
5.83957	2.62128	AT1G74960.3 | Symbols: FAB1 | fatty acid biosynthesis 1 | chr1:28152564-28155948 REVERSE LENGTH=541;AT1G74960.2 | Symbols: FAB1, KAS2 | fatty acid biosynthesis 1 | chr1:28152564-28155948 REVERSE LENGTH=541;AT1G74960.1 | Symbols: FAB1, KAS2, ATKAS2 | fatty	AT1G74960.3;AT1G74960.2;AT1G74960.1	AT1G74960.3;AT1G74960.2;AT1G74960.1		10	10	10	30.3	30.3	30.3	57.599	0	135.37	862600000	74	20.8572	20.8926	21.4116	21.0351	23.8404	23.6287	23.6241	23.5884
4.74622	2.61893	AT2G43750.2 | Symbols: OASB | O-acetylserine (thiol) lyase B | chr2:18129604-18132322 REVERSE LENGTH=392;AT2G43750.1 | Symbols: OASB, ACS1, CPACS1, ATCS-B | O-acetylserine (thiol) lyase B | chr2:18129604-18132322 REVERSE LENGTH=392	AT2G43750.2;AT2G43750.1	AT2G43750.2;AT2G43750.1		37	37	34	81.1	81.1	78.1	41.656	0	323.31	16290000000	585	24.863	24.9271	24.1726	25.1147	27.5417	27.2684	27.3777	27.3654
4.80125	2.61794	AT3G57050.1 | Symbols: CBL | cystathionine beta-lyase | chr3:21111939-21114521 REVERSE LENGTH=464;AT3G57050.2 | Symbols: CBL | cystathionine beta-lyase | chr3:21111939-21114521 REVERSE LENGTH=449;AT3G57050.3 | Symbols: CBL | cystathionine beta-lyase | chr3	AT3G57050.1;AT3G57050.2;AT3G57050.3	AT3G57050.1;AT3G57050.2;AT3G57050.3		18	18	18	51.7	51.7	51.7	50.429	0	111.63	980740000	105	21.202	20.9127	20.9827	21.2825	24.0934	23.205	23.8778	23.6754
4.96853	2.59849	AT4G34740.1 | Symbols: ATASE2, CIA1, ATPURF2, ASE2 | GLN phosphoribosyl pyrophosphate amidotransferase 2 | chr4:16574894-16576579 REVERSE LENGTH=561	AT4G34740.1	AT4G34740.1		35	16	16	73.6	45.3	45.3	61.03	0	217.22	2000000000	141	22.3032	23.014	22.4161	22.8195	25.0064	25.4762	25.1776	25.2865
2.16339	2.58977	AT4G34180.1 | Symbols: | Cyclase family protein | chr4:16370060-16371383 REVERSE LENGTH=255	AT4G34180.1;AT1G44542.1	AT4G34180.1		13	13	13	45.9	45.9	45.9	28.384	0	262.8	1603200000	113	22.9125	22.9804	20.79	20.7818	24.8919	24.442	24.268	24.2218
5.78639	2.58667	AT2G43810.2 | Symbols: | Small nuclear ribonucleoprotein family protein | chr2:18149725-18150879 FORWARD LENGTH=91;AT2G43810.1 | Symbols: | Small nuclear ribonucleoprotein family protein | chr2:18149725-18150879 FORWARD LENGTH=91	AT2G43810.2;AT2G43810.1	AT2G43810.2;AT2G43810.1		2	2	2	22	22	22	9.7279	0	5.5527	223480000	14	20.849	20.9789	21.3311	21.2381	23.9347	23.6279	23.6246	23.5566
2.17132	2.58447	AT1G51980.1 | Symbols: | Insulinase (Peptidase family M16) protein | chr1:19323692-19326771 REVERSE LENGTH=503;AT1G51980.2 | Symbols: | Insulinase (Peptidase family M16) protein | chr1:19323929-19326771 REVERSE LENGTH=451	AT1G51980.1;AT1G51980.2	AT1G51980.1;AT1G51980.2		48	48	36	90.1	90.1	77.5	54.401	0	323.31	49262000000	746	20.7392	21.0598	21.886	22.0896	23.2687	22.911	24.8089	25.1238
6.85589	2.57863	AT2G25950.1 | Symbols: | Protein of unknown function (DUF1000) | chr2:11068735-11070524 FORWARD LENGTH=204	AT2G25950.1	AT2G25950.1		6	6	6	48.5	48.5	48.5	22.689	0	99.8	454010000	44	21.1599	20.9306	21.1804	21.1198	23.8835	23.5978	23.6658	23.5582
2.38412	2.57813	AT2G17265.1 | Symbols: HSK, DMR1 | homoserine kinase | chr2:7508606-7509718 FORWARD LENGTH=370	AT2G17265.1	AT2G17265.1		19	19	19	72.2	72.2	72.2	38.528	0	272.13	2674000000	178	22.9746	23.6311	21.0079	23.0453	25.142	25.3144	25.3391	25.176
5.77289	2.56227	AT4G34890.1 | Symbols: ATXDH1, XDH1 | xanthine dehydrogenase 1 | chr4:16618736-16624983 REVERSE LENGTH=1361	AT4G34890.1	AT4G34890.1		39	39	16	45.8	45.8	23.4	149.19	0	267.35	1240700000	166	21.3723	20.9028	21.1823	21.1586	23.7417	23.4294	23.7956	23.8983
3.16904	2.55988	AT5G66120.2 | Symbols: | 3-dehydroquinate synthase, putative | chr5:26431516-26433649 REVERSE LENGTH=442;AT5G66120.1 | Symbols: | 3-dehydroquinate synthase, putative | chr5:26431516-26433079 REVERSE LENGTH=338	AT5G66120.2;AT5G66120.1	AT5G66120.2;AT5G66120.1		24	24	24	64.7	64.7	64.7	48.064	0	323.31	2933200000	238	20.9263	21.3743	21.0676	20.8966	22.7404	23.6609	23.4946	24.6085
5.41038	2.54917	AT3G20390.1 | Symbols: | endoribonuclease L-PSP family protein | chr3:7110227-7111695 REVERSE LENGTH=187	AT3G20390.1	AT3G20390.1		13	13	13	74.3	74.3	74.3	19.816	0	174.74	6220700000	239	23.5531	23.472	23.1435	23.7849	26.2664	25.8952	26.0935	25.8951
1.29978	2.54266	AT2G35120.1 | Symbols: | Single hybrid motif superfamily protein | chr2:14805913-14807274 REVERSE LENGTH=156	AT2G35120.1	AT2G35120.1		9	9	9	61.5	61.5	61.5	17.1	0	162.64	5975400000	134	20.7776	20.8478	21.1473	20.926	24.8144	24.036	20.3964	24.6225
4.95446	2.52172	AT1G75330.1 | Symbols: OTC | ornithine carbamoyltransferase | chr1:28266457-28268383 REVERSE LENGTH=375	AT1G75330.1	AT1G75330.1		21	21	21	60	60	60	41.002	0	317.05	4770500000	236	22.8728	23.647	23.3733	23.6311	25.757	25.8864	26.0295	25.9382
2.07352	2.51728	AT5G11520.1 | Symbols: ASP3, YLS4 | aspartate aminotransferase 3 | chr5:3685257-3687721 REVERSE LENGTH=449	AT5G11520.1	AT5G11520.1		32	26	26	66.1	60.4	60.4	48.954	0	323.31	10348000000	406	20.1466	22.8279	21.6037	22.813	24.2321	24.6824	24.0047	24.5412
5.25388	2.51405	AT3G18030.1 | Symbols: ATHAL3A, HAL3A, HAL3, ATHAL3 | HAL3-like protein A | chr3:6167883-6168629 REVERSE LENGTH=209	AT3G18030.1	AT3G18030.1		10	10	8	72.7	72.7	56.9	23.355	0	88.32	370220000	58	21.0069	20.6507	20.9802	20.8091	23.0443	23.6538	23.2196	23.5854
7.7605	2.50736	AT1G12410.1 | Symbols: CLPR2, NCLPP2, CLP2 | CLP protease proteolytic subunit 2 | chr1:4223099-4224954 FORWARD LENGTH=279	AT1G12410.1	AT1G12410.1		13	13	13	54.5	54.5	54.5	31.208	0	134.7	1009500000	105	21.0604	21.028	21.0628	20.9105	23.5479	23.6598	23.4336	23.4497
4.76282	2.50207	AT1G80600.1 | Symbols: WIN1 | HOPW1-1-interacting 1 | chr1:30298675-30300513 REVERSE LENGTH=457	AT1G80600.1	AT1G80600.1		36	36	36	77.7	77.7	77.7	48.826	0	323.31	8301700000	400	23.1011	23.7695	23.5032	24.0455	26.1836	26.0807	26.0833	26.08
3.54759	2.49078	AT1G28350.1 | Symbols: | Nucleotidylyl transferase superfamily protein | chr1:9944483-9949577 FORWARD LENGTH=748	AT1G28350.1	AT1G28350.1		19	19	16	29.7	29.7	24.1	84.717	0	65.361	668370000	89	21.0877	22.2993	21.2336	20.9093	24.1521	23.8524	23.629	23.8594
4.3775	2.4802	AT1G53240.1 | Symbols: mMDH1 | Lactate/malate dehydrogenase family protein | chr1:19854966-19856802 REVERSE LENGTH=341	AT1G53240.1	AT1G53240.1		23	21	15	73.6	73.6	67.2	35.804	0	323.31	117310000000	722	25.5789	25.9416	25.9099	26.3634	28.0454	28.2386	28.7439	28.6866
2.45318	2.47988	AT5G26780.1 | Symbols: SHM2 | serine hydroxymethyltransferase 2 | chr5:9418299-9421725 FORWARD LENGTH=517;AT5G26780.3 | Symbols: SHM2 | serine hydroxymethyltransferase 2 | chr5:9418299-9421725 FORWARD LENGTH=533;AT5G26780.2 | Symbols: SHM2 | serine hydroxy	AT5G26780.1;AT5G26780.3;AT5G26780.2	AT5G26780.1;AT5G26780.3;AT5G26780.2		43	43	32	78.9	78.9	64.4	57.341	0	323.31	17086000000	588	20.7612	20.6254	21.0685	19.893	21.8088	22.9165	23.9687	23.5735
4.61967	2.47629	AT3G11630.1 | Symbols: | Thioredoxin superfamily protein | chr3:3672189-3673937 FORWARD LENGTH=266	AT3G11630.1	AT3G11630.1		17	17	7	54.1	54.1	34.2	29.092	0	323.31	4964200000	202	23.732	24.1992	23.4697	24.3233	26.5914	26.2698	26.3157	26.4526
2.42119	2.46061	AT1G22840.1 | Symbols: CYTC-1, ATCYTC-A | CYTOCHROME C-1 | chr1:8079384-8080286 FORWARD LENGTH=114;AT1G22840.2 | Symbols: CYTC-1, ATCYTC-A | CYTOCHROME C-1 | chr1:8079384-8080246 FORWARD LENGTH=102	AT1G22840.1;AT1G22840.2	AT1G22840.1;AT1G22840.2		7	7	5	53.5	53.5	43.9	12.394	0	50.283	2191700000	96	20.8763	22.32	21.0894	22.9402	24.6802	23.6871	24.4559	24.2451
4.60563	2.45886	AT1G36280.1 | Symbols: | L-Aspartase-like family protein | chr1:13640600-13642908 FORWARD LENGTH=527;AT1G36280.2 | Symbols: | L-Aspartase-like family protein | chr1:13640600-13642908 FORWARD LENGTH=519	AT1G36280.1;AT1G36280.2	AT1G36280.1;AT1G36280.2		24	24	12	39.7	39.7	24.5	58.815	0	323.31	3827700000	259	22.9141	22.9982	22.841	23.6523	25.6597	25.2587	25.6892	25.6333
6.12281	2.44701	AT5G63570.1 | Symbols: GSA1 | glutamate-1-semialdehyde-2,1-aminomutase | chr5:25451957-25453620 FORWARD LENGTH=474	AT5G63570.1	AT5G63570.1		20	11	11	62.9	36.3	36.3	50.369	0	50.96	679760000	77	20.9625	20.8436	20.8158	20.8888	23.3145	23.0132	23.5116	23.4594
6.21355	2.44555	AT3G09810.1 | Symbols: IDH-VI | isocitrate dehydrogenase VI | chr3:3008753-3011070 FORWARD LENGTH=374	AT3G09810.1	AT3G09810.1		26	12	12	58.6	38.5	38.5	40.575	0	222.7	2893500000	149	20.6923	21.029	21.0139	21.0378	23.5164	23.2279	23.5157	23.2953
5.77225	2.44068	AT4G39860.2 | Symbols: | unknown protein;BEST Arabidopsis thaliana protein match is: unknown protein (TAIR:AT2G22270.1);Has 148 Blast hits to 144 proteins in 18 species: Archae - 0;Bacteria - 0;Metazoa - 0;Fungi - 0;Plants - 144;Viruses - 0;Other	AT4G39860.2;AT4G39860.1	AT4G39860.2;AT4G39860.1		11	10	10	50	47.7	47.7	31.949	0	78.816	373820000	54	20.892	20.5506	21.0786	20.973	23.4801	23.238	23.3653	23.1734
1.97829	2.44015	AT4G02860.1 | Symbols: | Phenazine biosynthesis PhzC/PhzF protein | chr4:1268952-1270508 REVERSE LENGTH=313	AT4G02860.1	AT4G02860.1		13	13	13	53.4	53.4	53.4	34.316	0	104.09	726960000	39	20.9497	23.3789	21.0441	20.8702	23.2926	24.47	23.8507	24.3901
3.10165	2.4328	AT1G12900.4 | Symbols: GAPA-2 | glyceraldehyde 3-phosphate dehydrogenase A subunit 2 | chr1:4392634-4393850 REVERSE LENGTH=350;AT1G12900.3 | Symbols: GAPA-2 | glyceraldehyde 3-phosphate dehydrogenase A subunit 2 | chr1:4392634-4393850 REVERSE LENGTH=350;AT	AT1G12900.4;AT1G12900.3;AT1G12900.1;AT1G12900.2	AT1G12900.4;AT1G12900.3;AT1G12900.1;AT1G12900.2		15	15	3	56.3	56.3	21.7	37.667	0	164.9	727170000	81	21.2354	21.4374	20.9181	22.1711	23.1078	24.0789	23.84	24.4666
6.06054	2.42736	AT1G80360.1 | Symbols: | Pyridoxal phosphate (PLP)-dependent transferases superfamily protein | chr1:30208736-30210643 REVERSE LENGTH=394	AT1G80360.1	AT1G80360.1		9	9	9	37.3	37.3	37.3	43.761	0	92.4	290120000	39	20.887	20.7344	20.8733	21.1456	23.4793	23.4225	23.3392	23.1088
4.34005	2.40232	AT4G24830.1 | Symbols: | arginosuccinate synthase family | chr4:12793085-12795857 REVERSE LENGTH=494;AT4G24830.2 | Symbols: | arginosuccinate synthase family | chr4:12793085-12795857 REVERSE LENGTH=450	AT4G24830.1;AT4G24830.2	AT4G24830.1;AT4G24830.2		38	38	38	77.5	77.5	77.5	53.845	0	323.31	6783400000	425	22.836	23.5318	22.8071	23.4216	25.1664	25.6395	25.6724	25.7276
4.06841	2.39652	AT4G26780.1 | Symbols: AR192 | Co-chaperone GrpE family protein | chr4:13485066-13486560 REVERSE LENGTH=327	AT4G26780.1	AT4G26780.1		17	16	16	50.5	50.5	50.5	36.116	0	323.31	5312800000	190	20.8362	20.9325	21.1812	21.2	22.7362	23.6702	23.8103	23.5193
4.13247	2.39491	AT2G19940.2 | Symbols: | oxidoreductases, acting on the aldehyde or oxo group of donors, NAD or NADP as acceptor;copper ion binding | chr2:8613168-8615649 FORWARD LENGTH=401;AT2G19940.1 | Symbols: | oxidoreductases, acting on the aldehyde or oxo group of	AT2G19940.2;AT2G19940.1	AT2G19940.2;AT2G19940.1		29	29	29	77.8	77.8	77.8	44.135	0	323.31	4462700000	315	22.516	22.9373	22.2148	23.238	24.8259	25.1128	25.2338	25.3133
6.28264	2.38761	AT3G55400.1 | Symbols: OVA1 | methionyl-tRNA synthetase / methionine--tRNA ligase / MetRS (cpMetRS) | chr3:20535809-20538999 REVERSE LENGTH=616;AT3G55400.2 | Symbols: OVA1 | methionyl-tRNA synthetase / methionine--tRNA ligase / MetRS (cpMetRS) | chr3:20536	AT3G55400.1;AT3G55400.2	AT3G55400.1;AT3G55400.2		25	25	25	50.6	50.6	50.6	69.273	0	323.31	3406300000	284	20.9951	20.6456	21.0732	20.8875	23.2881	23.1472	23.3193	23.3972
2.45464	2.38189	AT4G00620.1 | Symbols: | Amino acid dehydrogenase family protein | chr4:259265-260788 REVERSE LENGTH=360	AT4G00620.1;AT4G00600.1	AT4G00620.1		15	15	15	51.1	51.1	51.1	38.741	0	215.44	1305000000	120	20.9148	22.8338	21.2042	22.7832	24.1724	24.2527	24.4582	24.3803
4.95863	2.36329	AT5G46290.1 | Symbols: KASI, KAS1 | 3-ketoacyl-acyl carrier protein synthase I | chr5:18774439-18776629 REVERSE LENGTH=473;AT5G46290.2 | Symbols: KASI, KAS1 | 3-ketoacyl-acyl carrier protein synthase I | chr5:18774439-18776629 REVERSE LENGTH=418;AT5G46290.	AT5G46290.1;AT5G46290.2;AT5G46290.3	AT5G46290.1;AT5G46290.2;AT5G46290.3		32	32	32	70.6	70.6	70.6	50.413	0	323.31	12504000000	479	23.9227	24.4614	23.8875	24.415	26.7387	26.4082	26.373	26.6199
2.7343	2.35935	AT5G14590.1 | Symbols: | Isocitrate/isopropylmalate dehydrogenase family protein | chr5:4703533-4706627 REVERSE LENGTH=485	AT5G14590.1	AT5G14590.1		36	32	32	66.2	62.5	62.5	54.195	0	323.31	4899900000	359	20.5604	21.3395	21.3218	21.0046	22.2107	23.7193	23.7352	23.9984
5.68514	2.35837	AT2G37500.2 | Symbols: | arginine biosynthesis protein ArgJ family | chr2:15739904-15742430 REVERSE LENGTH=409;AT2G37500.1 | Symbols: | arginine biosynthesis protein ArgJ family | chr2:15739904-15742689 REVERSE LENGTH=468	AT2G37500.2;AT2G37500.1	AT2G37500.2;AT2G37500.1		11	11	11	47.4	47.4	47.4	42.225	0	57.588	371670000	39	20.8018	20.9574	21.1434	20.7508	23.547	23.1509	23.2845	23.1046
5.40039	2.35787	AT4G29840.1 | Symbols: MTO2, TS | Pyridoxal-5-phosphate-dependent enzyme family protein | chr4:14599434-14601014 REVERSE LENGTH=526	AT4G29840.1	AT4G29840.1		35	35	31	71.1	71.1	65.8	57.776	0	323.31	11498000000	505	23.788	24.0446	24.0136	24.4289	26.5578	26.4628	26.2421	26.4438
7.11	2.34976	AT4G29130.1 | Symbols: ATHXK1, GIN2, HXK1 | hexokinase 1 | chr4:14352338-14354865 REVERSE LENGTH=496	AT4G29130.1	AT4G29130.1		41	41	34	76.8	76.8	71.6	53.706	0	323.31	11654000000	474	21.1486	21.0306	20.8923	21.1034	23.3152	23.3048	23.5228	23.4312
2.61534	2.34273	AT5G06060.1 | Symbols: | NAD(P)-binding Rossmann-fold superfamily protein | chr5:1824066-1825833 REVERSE LENGTH=264	AT5G06060.1;AT2G29350.3;AT2G29290.1;AT2G29290.2;AT2G29370.1	AT5G06060.1		14	14	13	63.3	63.3	58.7	28.292	0	160.26	808400000	82	20.9413	22.4259	22.2104	20.9167	24.5335	24.1714	23.5207	23.6395
3.71691	2.34187	AT3G53180.1 | Symbols: | glutamate-ammonia ligases;catalytics;glutamate-ammonia ligases | chr3:19707068-19711188 FORWARD LENGTH=852	AT3G53180.1	AT3G53180.1		36	36	36	56.7	56.7	56.7	94.384	0	285.09	1426900000	187	21.2518	22.4941	21.9421	21.9349	24.6221	24.1381	23.9675	24.2626
6.22304	2.33608	AT5G56500.2 | Symbols: | TCP-1/cpn60 chaperonin family protein | chr5:22874058-22876966 FORWARD LENGTH=597;AT5G56500.1 | Symbols: | TCP-1/cpn60 chaperonin family protein | chr5:22874058-22876966 FORWARD LENGTH=597	AT5G56500.2;AT5G56500.1	AT5G56500.2;AT5G56500.1		34	14	14	62.5	34.3	34.3	63.324	0	65.612	564060000	86	20.8152	20.5298	20.8437	20.942	23.1155	23.0613	23.0118	23.2864
1.89893	2.33307	AT2G27150.2 | Symbols: AAO3, At-AO3, AOdelta, AtAAO3 | abscisic aldehyde oxidase 3 | chr2:11601952-11607014 FORWARD LENGTH=1332;AT2G27150.1 | Symbols: AAO3, At-AO3, AOdelta, AtAAO3 | abscisic aldehyde oxidase 3 | chr2:11601952-11607014 FORWARD LENGTH=1332	AT2G27150.2;AT2G27150.1	AT2G27150.2;AT2G27150.1		32	32	31	41.1	41.1	39.8	146.7	0	189.28	799310000	150	21.751	20.1313	20.8609	20.5083	21.4799	23.6695	23.4437	23.9908
3.25259	2.3294	AT1G50940.1 | Symbols: ETFALPHA | electron transfer flavoprotein alpha | chr1:18878038-18879939 REVERSE LENGTH=363	AT1G50940.1	AT1G50940.1		23	23	23	54.5	54.5	54.5	38.407	0	323.31	7808800000	252	20.9091	20.8754	20.7823	20.8813	22.4258	22.8005	23.6027	23.9367
5.57575	2.32939	AT4G33030.1 | Symbols: SQD1 | sulfoquinovosyldiacylglycerol 1 | chr4:15936051-15937566 FORWARD LENGTH=477	AT4G33030.1	AT4G33030.1		45	45	45	69	69	69	53.113	0	323.31	28703000000	777	24.8101	25.2277	25.0787	25.0592	27.6469	27.3082	27.1372	27.401
4.68119	2.32451	AT5G63890.1 | Symbols: ATHDH, HISN8, HDH | histidinol dehydrogenase | chr5:25565600-25567879 REVERSE LENGTH=452;AT5G63890.2 | Symbols: ATHDH, HISN8, HDH | histidinol dehydrogenase | chr5:25565600-25568104 REVERSE LENGTH=466	AT5G63890.1;AT5G63890.2	AT5G63890.1;AT5G63890.2		15	15	15	45.4	45.4	45.4	48.956	0	261.49	1778700000	144	22.3064	22.3653	22.0409	22.8905	24.5162	24.8036	24.7	24.8813
4.22452	2.32053	AT1G69740.2 | Symbols: HEMB1 | Aldolase superfamily protein | chr1:26232197-26234713 FORWARD LENGTH=430;AT1G69740.1 | Symbols: HEMB1 | Aldolase superfamily protein | chr1:26232197-26234713 FORWARD LENGTH=430	AT1G69740.2;AT1G69740.1	AT1G69740.2;AT1G69740.1		27	27	27	69.8	69.8	69.8	46.69	0	323.31	8986600000	352	23.6452	24.2361	23.93	24.7007	26.4007	26.49	26.3161	26.5873
7.10606	2.31977	AT5G54810.1 | Symbols: TSB1, TRPB, TRP2, ATTSB1 | tryptophan synthase beta-subunit 1 | chr5:22264805-22266738 REVERSE LENGTH=470	AT5G54810.1	AT5G54810.1		25	25	10	57.4	57.4	27.9	50.925	0	323.31	9464500000	346	24.1231	24.186	24.0819	24.0188	26.6223	26.3575	26.3588	26.3503
2.32602	2.31756	AT5G19150.2 | Symbols: | pfkB-like carbohydrate kinase family protein | chr5:6426280-6428402 REVERSE LENGTH=365;AT5G19150.1 | Symbols: | pfkB-like carbohydrate kinase family protein | chr5:6426280-6428402 REVERSE LENGTH=365	AT5G19150.2;AT5G19150.1	AT5G19150.2;AT5G19150.1		11	11	11	47.1	47.1	47.1	39.269	0	114.75	959110000	97	23.2829	23.3084	21.144	22.0647	24.8101	24.8265	24.5165	24.917
6.50893	2.31374	AT3G48730.1 | Symbols: GSA2 | glutamate-1-semialdehyde 2,1-aminomutase 2 | chr3:18049697-18051550 FORWARD LENGTH=472	AT3G48730.1	AT3G48730.1		24	24	15	80.1	80.1	53.4	50.141	0	323.31	13043000000	466	24.3215	24.6353	24.4671	24.6983	26.8254	26.7416	26.9408	26.8694
4.6135	2.31118	AT5G22510.1 | Symbols: INV-E, At-A/N-InvE | alkaline/neutral invertase | chr5:7474974-7477479 REVERSE LENGTH=617	AT5G22510.1	AT5G22510.1		13	13	13	26.6	26.6	26.6	69.239	0	147.79	473870000	46	20.8968	20.8351	21.243	20.7561	22.846	23.6136	23.1161	23.4
3.96786	2.31075	AT5G40770.1 | Symbols: ATPHB3, PHB3 | prohibitin 3 | chr5:16315589-16316621 REVERSE LENGTH=277	AT5G40770.1;AT5G14300.1	AT5G40770.1		33	18	18	97.5	81.6	81.6	30.399	0	323.31	28016000000	376	20.8985	20.9386	20.965	20.9006	22.652	23.0288	23.8517	23.4131
5.04668	2.30748	AT5G20080.1 | Symbols: | FAD/NAD(P)-binding oxidoreductase | chr5:6782708-6786360 FORWARD LENGTH=328	AT5G20080.1	AT5G20080.1		39	39	39	78.7	78.7	78.7	35.987	0	323.31	60127000000	746	24.5802	24.6076	24.7589	25.2312	27.2627	26.9167	27.0834	27.1449
3.07374	2.30301	AT3G16910.1 | Symbols: AAE7, ACN1 | acyl-activating enzyme 7 | chr3:5773231-5775411 REVERSE LENGTH=569	AT3G16910.1	AT3G16910.1		26	26	26	66.1	66.1	66.1	62.956	0	323.31	9058900000	359	21.0335	21.4472	21.1911	22.4047	23.2403	23.9079	23.8719	24.2684
2.31746	2.30115	AT5G10870.1 | Symbols: ATCM2, CM2 | chorismate mutase 2 | chr5:3430691-3432272 REVERSE LENGTH=265	AT5G10870.1	AT5G10870.1		13	13	13	55.8	55.8	55.8	30.49	0	160.53	627940000	76	20.9615	20.7052	20.9123	22.9303	23.8499	23.7208	23.7282	23.4152
5.16122	2.30085	AT5G10330.2 | Symbols: EMB2196, HPA1, HISN6A, ATHPA1 | histidinol phosphate aminotransferase 1 | chr5:3248027-3249858 REVERSE LENGTH=417;AT5G10330.1 | Symbols: EMB2196, HPA1, HISN6A, ATHPA1 | histidinol phosphate aminotransferase 1 | chr5:3248027-3249858 R	AT5G10330.2;AT5G10330.1;AT1G71920.2;AT5G10330.3;AT1G71920.3;AT1G71920.1	AT5G10330.2;AT5G10330.1;AT1G71920.2;AT5G10330.3;AT1G71920.3;AT1G71920.1		11	11	11	43.2	43.2	43.2	46.634	0	83.354	366750000	51	20.7394	20.5454	21.0195	21.1289	23.076	22.9553	23.3452	23.2601
3.93833	2.2968	AT1G20630.1 | Symbols: CAT1 | catalase 1 | chr1:7146812-7149609 FORWARD LENGTH=492	AT1G20630.1	AT1G20630.1		45	38	28	77.6	67.5	57.9	56.761	0	323.31	37804000000	653	24.0916	24.9218	24.1968	24.9633	26.566	26.9013	26.771	27.1224
2.00114	2.28869	AT1G05350.1 | Symbols: | NAD(P)-binding Rossmann-fold superfamily protein | chr1:1560891-1564005 REVERSE LENGTH=431	AT1G05350.1	AT1G05350.1		16	16	16	59.2	59.2	59.2	47.02	0	245.27	1194300000	133	23.0941	23.2676	21.1896	21.0251	24.8209	24.4641	24.2337	24.2125
4.88382	2.28691	ATCG00490.1 | Symbols: RBCL | ribulose-bisphosphate carboxylases | chrC:54958-56397 FORWARD LENGTH=479	ATCG00490.1;ATMG00280.1;AT2G07732.1	ATCG00490.1		27	27	27	61.2	61.2	61.2	52.954	0	323.31	4129300000	300	22.4165	22.9482	22.82	23.0314	25.0063	25.3322	24.8206	25.2047
6.38865	2.28533	AT2G16570.1 | Symbols: ATASE, ATASE1, ASE1 | GLN phosphoribosyl pyrophosphate amidotransferase 1 | chr2:7180424-7182124 REVERSE LENGTH=566	AT2G16570.1	AT2G16570.1		38	38	19	75.8	75.8	52.8	61.842	0	323.31	14735000000	506	25.0917	25.2492	25.2042	25.4446	27.5879	27.615	27.3394	27.5889
4.56744	2.28515	AT1G06130.2 | Symbols: GLX2-4 | glyoxalase 2-4 | chr1:1858034-1860640 REVERSE LENGTH=330;AT1G06130.1 | Symbols: GLX2-4 | glyoxalase 2-4 | chr1:1858034-1860640 REVERSE LENGTH=331	AT1G06130.2;AT1G06130.1	AT1G06130.2;AT1G06130.1		12	12	9	41.8	41.8	32.4	36.496	0	323.31	2164900000	161	20.8645	20.72	20.9648	20.7535	23.1833	23.0983	22.6138	23.5479
3.47392	2.27858	AT5G58330.1 | Symbols: | lactate/malate dehydrogenase family protein | chr5:23580010-23582287 REVERSE LENGTH=443;AT5G58330.2 | Symbols: | lactate/malate dehydrogenase family protein | chr5:23580010-23582287 REVERSE LENGTH=442;AT5G58330.3 | Symbols: | la	AT5G58330.1;AT5G58330.2;AT5G58330.3	AT5G58330.1;AT5G58330.2;AT5G58330.3		24	24	24	66.8	66.8	66.8	48.316	0	323.31	7061600000	375	22.9077	23.8301	23.3554	23.77	25.4185	26.0416	25.2984	26.219
3.32101	2.27773	AT3G15290.1 | Symbols: | 3-hydroxyacyl-CoA dehydrogenase family protein | chr3:5145054-5146613 FORWARD LENGTH=294	AT3G15290.1	AT3G15290.1		20	20	20	86.7	86.7	86.7	31.689	0	323.31	3643300000	212	20.772	21.3384	21.1915	21.7792	22.7831	23.9301	23.6853	23.7934
2.1824	2.27753	AT1G55090.1 | Symbols: | carbon-nitrogen hydrolase family protein | chr1:20554857-20558188 FORWARD LENGTH=725	AT1G55090.1	AT1G55090.1		30	30	30	52.7	52.7	52.7	80.9	0	323.31	1615200000	174	22.7246	23.1686	21.5976	21.6532	24.9444	25.1934	23.4031	24.713
1.59145	2.27077	AT4G31840.1 | Symbols: ENODL15, AtENODL15 | early nodulin-like protein 15 | chr4:15401798-15402426 FORWARD LENGTH=177	AT4G31840.1	AT4G31840.1		6	6	6	35	35	35	18.961	0	45.535	1370200000	80	24.0058	24.1027	20.9979	23.2225	25.8713	25.4281	24.6078	25.5048
2.46673	2.26198	AT4G29680.1 | Symbols: | Alkaline-phosphatase-like family protein | chr4:14538067-14539557 REVERSE LENGTH=496	AT4G29680.1	AT4G29680.1		13	13	13	38.5	38.5	38.5	54.678	0	60.983	1226000000	101	22.7695	23.1584	22.3835	20.9904	24.6786	24.3637	24.4729	24.8346
5.09996	2.25695	AT1G17160.2 | Symbols: | pfkB-like carbohydrate kinase family protein | chr1:5867678-5869175 FORWARD LENGTH=355;AT1G17160.1 | Symbols: | pfkB-like carbohydrate kinase family protein | chr1:5867678-5869215 FORWARD LENGTH=379	AT1G17160.2;AT1G17160.1	AT1G17160.2;AT1G17160.1		11	11	11	58.3	58.3	58.3	37.676	0	84.012	686230000	81	20.7052	21.0913	21.3623	21.0888	23.5487	23.1403	23.259	23.3275
3.732	2.25404	AT3G46970.1 | Symbols: ATPHS2, PHS2 | alpha-glucan phosphorylase 2 | chr3:17301625-17306111 REVERSE LENGTH=841	AT3G46970.1	AT3G46970.1		26	25	25	50.8	48.9	48.9	95.158	0	141.66	590770000	90	21.464	21.2481	21.8725	21.6505	24.1112	24.0233	23.0861	24.0306
5.24157	2.25291	AT5G61410.2 | Symbols: RPE | D-ribulose-5-phosphate-3-epimerase | chr5:24684085-24685836 REVERSE LENGTH=281;AT5G61410.1 | Symbols: RPE, EMB2728 | D-ribulose-5-phosphate-3-epimerase | chr5:24684085-24685836 REVERSE LENGTH=281	AT5G61410.2;AT5G61410.1	AT5G61410.2;AT5G61410.1		7	7	7	42.7	42.7	42.7	30.008	0	60.814	284530000	37	20.742	20.713	20.9699	21.2455	22.9362	23.179	23.2105	23.3564
4.61689	2.25141	AT5G62530.1 | Symbols: ALDH12A1, ATP5CDH, P5CDH | aldehyde dehydrogenase 12A1 | chr5:25099768-25103159 REVERSE LENGTH=556	AT5G62530.1	AT5G62530.1		31	31	31	68.7	68.7	68.7	61.772	0	323.31	5527500000	312	20.8404	20.8007	20.9622	20.76	23.493	22.5866	23.1004	23.1889
4.30596	2.24354	AT1G72810.1 | Symbols: | Pyridoxal-5-phosphate-dependent enzyme family protein | chr1:27398760-27400393 REVERSE LENGTH=516	AT1G72810.1	AT1G72810.1		19	15	15	44.8	36.6	36.6	56.924	0	221.69	1278700000	144	21.496	21.5862	21.424	22.2549	24.2288	23.9339	23.7499	23.8227
6.92915	2.24154	AT5G14530.1 | Symbols: | Transducin/WD40 repeat-like superfamily protein | chr5:4684782-4686865 REVERSE LENGTH=330	AT5G14530.1	AT5G14530.1		6	6	6	34.2	34.2	34.2	36.628	0	23.693	176450000	27	21.1083	20.849	20.9372	20.9445	23.1459	23.2961	23.2936	23.0695
6.2856	2.24021	AT5G02770.1 | Symbols: | unknown protein;Has 469 Blast hits to 336 proteins in 126 species: Archae - 0;Bacteria - 54;Metazoa - 249;Fungi - 22;Plants - 47;Viruses - 0;Other Eukaryotes - 97 (source: NCBI BLink). | chr5:628101-629168 REVERSE LENGTH=21	AT5G02770.1	AT5G02770.1		8	8	8	37.9	37.9	37.9	22.779	0	155.91	241690000	35	20.9798	20.8933	20.9554	20.8675	23.4463	23.1316	23.0442	23.0348
4.2806	2.23917	AT2G28100.1 | Symbols: ATFUC1, FUC1 | alpha-L-fucosidase 1 | chr2:11974803-11976489 FORWARD LENGTH=506	AT2G28100.1	AT2G28100.1		11	11	11	26.9	26.9	26.9	57.186	0	54.752	258040000	38	20.6617	20.4393	21.1756	20.9381	23.3806	23.2125	22.7902	22.7881
2.60914	2.23449	AT2G02740.2 | Symbols: ATWHY3, PTAC11, WHY3 | ssDNA-binding transcriptional regulator | chr2:769389-770993 FORWARD LENGTH=267;AT2G02740.1 | Symbols: ATWHY3, PTAC11, WHY3 | ssDNA-binding transcriptional regulator | chr2:769389-770993 FORWARD LENGTH=268	AT2G02740.2;AT2G02740.1	AT2G02740.2;AT2G02740.1		14	14	11	53.6	53.6	45.3	29.64	0	323.31	1173000000	80	20.7788	20.9132	20.9943	22.5786	23.1302	23.7918	23.6379	23.6428
5.29361	2.22922	AT1G13930.3 | Symbols: | Involved in response to salt stress. Knockout mutants are hypersensitive to salt stress. | chr1:4761091-4761558 FORWARD LENGTH=155;AT1G13930.2 | Symbols: | Involved in response to salt stress. Knockout mutants are hypersensitiv	AT1G13930.3;AT1G13930.2;AT1G13930.1	AT1G13930.3;AT1G13930.2;AT1G13930.1		7	7	7	57.4	57.4	57.4	16.163	0	27.524	254900000	35	20.7604	20.6477	20.9116	21.0491	22.8003	23.1875	23.3312	22.9667
1.77861	2.22742	AT1G08780.1 | Symbols: AIP3, PFD4 | ABI3-interacting protein 3 | chr1:2809925-2811126 REVERSE LENGTH=129	AT1G08780.1	AT1G08780.1		11	11	11	90.7	90.7	90.7	14.88	0	47.446	490320000	35	23.6841	21.0007	21.3232	21.3325	24.5043	24.3718	23.2974	24.0767
2.31153	2.22684	AT2G45730.1 | Symbols: | eukaryotic initiation factor 3 gamma subunit family protein | chr2:18836519-18839123 REVERSE LENGTH=446	AT2G45730.1	AT2G45730.1		15	15	15	47.3	47.3	47.3	49.41	0	260.67	854300000	82	20.8462	22.5413	21.2705	22.9887	24.2539	24.2582	24.0576	23.9844
4.05634	2.22489	AT3G01120.1 | Symbols: MTO1, CGS, ATCYS1, CGS1 | Pyridoxal phosphate (PLP)-dependent transferases superfamily protein | chr3:39234-41865 REVERSE LENGTH=563	AT3G01120.1	AT3G01120.1		24	24	24	49.9	49.9	49.9	59.918	0	323.31	2882400000	219	22.4995	23.253	22.9409	23.4801	25.5881	25.2449	25.1146	25.1256
2.11961	2.2182	AT4G08790.1 | Symbols: | Nitrilase/cyanide hydratase and apolipoprotein N-acyltransferase family protein | chr4:5608489-5611118 REVERSE LENGTH=307	AT4G08790.1	AT4G08790.1		16	16	16	68.4	68.4	68.4	33.971	0	109.98	612270000	65	22.8922	20.7502	21.0371	22.4624	24.0449	23.4256	24.2438	24.3005
5.71981	2.21753	AT3G15360.1 | Symbols: ATHM4, TRX-M4, ATM4 | thioredoxin M-type 4 | chr3:5188448-5189457 FORWARD LENGTH=193	AT3G15360.1	AT3G15360.1		5	5	5	31.6	31.6	31.6	21.172	0	42.808	362450000	43	21.0067	20.6424	20.9004	20.8037	23.3299	22.9899	22.8822	23.0212
3.44986	2.21248	AT4G39660.1 | Symbols: AGT2 | alanine:glyoxylate aminotransferase 2 | chr4:18406797-18409262 FORWARD LENGTH=476	AT4G39660.1	AT4G39660.1		30	30	30	80	80	80	51.952	0	323.31	4574500000	272	21.0361	20.6157	21.2259	20.9966	22.4023	23.1602	23.5608	23.6008
4.31489	2.20732	AT4G34555.1 | Symbols: | Ribosomal protein S25 family protein | chr4:16504381-16505339 REVERSE LENGTH=108;AT2G16360.1 | Symbols: | Ribosomal protein S25 family protein | chr2:7076713-7077366 REVERSE LENGTH=125	AT4G34555.1;AT2G16360.1	AT4G34555.1;AT2G16360.1		9	3	3	54.6	32.4	32.4	12.018	0	83.427	209180000	25	20.6799	21.1005	20.9075	20.734	22.588	23.1617	23.5105	22.9909
1.73132	2.20712	AT1G79260.1 | Symbols: | CONTAINS InterPro DOMAIN/s: Domain of unknown function DUF1794 (InterPro:IPR014878);Has 30201 Blast hits to 17322 proteins in 780 species: Archae - 12;Bacteria - 1396;Metazoa - 17338;Fungi - 3422;Plants - 5037;Viruses - 0;O	AT1G79260.1	AT1G79260.1		8	8	8	72.3	72.3	72.3	18.486	0	55.822	1187700000	63	23.8426	23.7102	21.0619	23.6261	25.7235	25.3095	25.1207	24.9156
5.29885	2.19913	AT1G77670.1 | Symbols: | Pyridoxal phosphate (PLP)-dependent transferases superfamily protein | chr1:29189043-29190901 REVERSE LENGTH=440	AT1G77670.1	AT1G77670.1		12	12	12	34.3	34.3	34.3	48.709	0	43.512	507010000	58	21.0574	20.7598	21.1465	21.1198	22.954	23.4903	23.1445	23.2912
5.55776	2.19868	AT4G32520.2 | Symbols: SHM3 | serine hydroxymethyltransferase 3 | chr4:15689642-15692334 REVERSE LENGTH=529;AT4G32520.1 | Symbols: SHM3, AtSHMT3 | serine hydroxymethyltransferase 3 | chr4:15689642-15692334 REVERSE LENGTH=529	AT4G32520.2;AT4G32520.1	AT4G32520.2;AT4G32520.1		44	44	44	73.5	73.5	73.5	57.982	0	323.31	16432000000	651	24.1103	24.3028	24.0181	24.5949	26.4226	26.4268	26.4349	26.5365
4.3426	2.19109	AT3G46560.1 | Symbols: TIM9, emb2474 | Tim10/DDP family zinc finger protein | chr3:17138632-17139301 FORWARD LENGTH=93	AT3G46560.1	AT3G46560.1		10	10	10	83.9	83.9	83.9	10.715	0	323.31	6588800000	176	21.1395	21.0435	21.515	21.8819	23.8049	23.6415	23.4611	23.4367
1.55287	2.18881	AT3G04790.1 | Symbols: | Ribose 5-phosphate isomerase, type A protein | chr3:1313365-1314195 FORWARD LENGTH=276	AT3G04790.1	AT3G04790.1		11	11	11	54.7	54.7	54.7	29.305	0	256.91	3776600000	219	23.4784	23.8759	20.7472	23.8822	25.0606	25.0379	25.3119	25.3286
1.1328	2.18729	AT4G00860.1 | Symbols: ATOZI1, AT0ZI1 | Protein of unknown function (DUF1138) | chr4:359548-359868 REVERSE LENGTH=80	AT4G00860.1	AT4G00860.1		7	7	7	83.8	83.8	83.8	8.6058	0	116	7094200000	82	21.2447	21.0995	21.2521	21.402	20.4146	24.2964	24.5052	24.5315
3.8152	2.18675	AT5G08280.1 | Symbols: HEMC | hydroxymethylbilane synthase | chr5:2663763-2665596 REVERSE LENGTH=382	AT5G08280.1	AT5G08280.1		18	18	18	52.9	52.9	52.9	41.043	0	113.6	670380000	91	21.1901	21.4054	21.3496	20.9895	23.7946	23.582	22.7079	23.597
5.45612	2.18649	AT1G32500.1 | Symbols: ATNAP6, NAP6 | non-intrinsic ABC protein 6 | chr1:11750091-11751994 REVERSE LENGTH=475	AT1G32500.1	AT1G32500.1		10	10	10	26.3	26.3	26.3	52.824	0	165.54	387290000	51	20.9565	20.6104	21.0284	21.0666	23.3361	22.9418	23.017	23.1129
5.32735	2.1717	AT3G49680.2 | Symbols: ATBCAT-3, BCAT3 | branched-chain aminotransferase 3 | chr3:18422768-18425473 FORWARD LENGTH=411;AT3G49680.1 | Symbols: ATBCAT-3, BCAT3 | branched-chain aminotransferase 3 | chr3:18422768-18425473 FORWARD LENGTH=413	AT3G49680.2;AT3G49680.1	AT3G49680.2;AT3G49680.1		9	9	7	33.6	33.6	29	44.731	0	123.22	562100000	87	20.6756	20.8177	21.1853	21.1431	23.0669	23.0325	23.0859	23.3232
2.89262	2.16746	AT3G17210.1 | Symbols: ATHS1, HS1 | heat stable protein 1 | chr3:5882318-5882896 FORWARD LENGTH=109	AT3G17210.1	AT3G17210.1		13	13	13	100	100	100	12.184	0	171.29	9123300000	217	25.4778	25.6288	24.5088	24.1839	27.5011	27.1031	27	26.8649
1.52504	2.16684	AT2G44050.1 | Symbols: COS1 | 6,7-dimethyl-8-ribityllumazine synthase / DMRL synthase / lumazine synthase / riboflavin synthase | chr2:18224304-18225917 FORWARD LENGTH=227	AT2G44050.1	AT2G44050.1		6	6	6	45.8	45.8	45.8	24.024	0	49.127	2231800000	74	23.9933	24.0313	21.2222	24.5949	25.8016	25.3622	25.7438	25.6015
4.31097	2.15384	AT3G60880.1 | Symbols: DHDPS, DHDPS1 | dihydrodipicolinate synthase 1 | chr3:22495086-22496542 FORWARD LENGTH=364;AT3G60880.2 | Symbols: DHDPS, DHDPS1 | dihydrodipicolinate synthase 1 | chr3:22495086-22496542 FORWARD LENGTH=365	AT3G60880.1;AT3G60880.2	AT3G60880.1;AT3G60880.2		12	8	8	47.8	41.8	41.8	40.464	0	79.201	269920000	29	21.0172	20.9554	21.3799	20.8445	23.6768	22.9903	23.2455	22.8999
5.47307	2.15356	AT5G40190.1 | Symbols: | RNA ligase/cyclic nucleotide phosphodiesterase family protein | chr5:16069298-16069849 REVERSE LENGTH=183	AT5G40190.1;AT3G28140.2;AT3G28140.1	AT5G40190.1		5	5	5	42.1	42.1	42.1	20.616	0	39.807	198670000	24	20.8019	21.013	21.0729	21.1019	23.4753	23.0689	23.109	22.9507
1.56588	2.14309	AT5G57850.1 | Symbols: | D-aminoacid aminotransferase-like PLP-dependent enzymes superfamily protein | chr5:23435548-23437287 REVERSE LENGTH=373	AT5G57850.1	AT5G57850.1		14	14	14	56	56	56	41.064	0	165.33	986210000	93	20.8385	22.4353	21.0181	22.2589	21.9833	24.0339	24.5447	24.5613
3.00042	2.13697	AT1G80460.2 | Symbols: NHO1, GLI1 | Actin-like ATPase superfamily protein | chr1:30246960-30249055 REVERSE LENGTH=482;AT1G80460.1 | Symbols: NHO1, GLI1 | Actin-like ATPase superfamily protein | chr1:30246960-30249055 REVERSE LENGTH=522	AT1G80460.2;AT1G80460.1	AT1G80460.2;AT1G80460.1		25	25	25	52.7	52.7	52.7	52.483	0	203.38	1689200000	183	22.6407	23.0246	21.7535	21.7567	24.7087	24.6422	24.0041	24.3683
4.42532	2.13409	AT4G39800.1 | Symbols: MI-1-P SYNTHASE, MIPS1, ATMIPS1, ATIPS1 | myo-inositol-1-phosphate synthase 1 | chr4:18469659-18471893 REVERSE LENGTH=511	AT4G39800.1	AT4G39800.1		28	16	12	67.7	43.6	35	56.514	0	107.67	1119200000	113	22.88	23.0319	22.4597	22.212	24.7078	24.6814	24.783	24.9475
2.72855	2.13212	AT1G31190.1 | Symbols: IMPL1 | myo-inositol monophosphatase like 1 | chr1:11144861-11146800 FORWARD LENGTH=371	AT1G31190.1	AT1G31190.1		12	12	12	49.6	49.6	49.6	40.445	0	127.96	1649700000	161	21.0358	21.0527	20.9482	22.5266	23.1879	23.4127	23.6813	23.8098
4.86867	2.13118	AT2G35040.2 | Symbols: | AICARFT/IMPCHase bienzyme family protein | chr2:14765347-14768023 REVERSE LENGTH=545;AT2G35040.1 | Symbols: | AICARFT/IMPCHase bienzyme family protein | chr2:14765347-14768269 REVERSE LENGTH=596	AT2G35040.2;AT2G35040.1	AT2G35040.2;AT2G35040.1		35	35	35	86.1	86.1	86.1	59.471	0	323.31	8015300000	471	23.3307	23.9262	23.2888	23.675	25.5005	25.7234	25.6946	25.8269
4.99486	2.12963	AT1G70570.1 | Symbols: | anthranilate phosphoribosyltransferase, putative | chr1:26608719-26612062 FORWARD LENGTH=595;AT1G70570.2 | Symbols: | anthranilate phosphoribosyltransferase, putative | chr1:26608719-26612062 FORWARD LENGTH=632	AT1G70570.1;AT1G70570.2	AT1G70570.1;AT1G70570.2		25	25	25	57	57	57	65.224	0	112.63	592740000	90	20.9358	20.4705	21.0205	20.7462	22.8331	22.7356	23.1984	22.9245
2.60149	2.12737	AT3G06050.1 | Symbols: PRXIIF, ATPRXIIF | peroxiredoxin IIF | chr3:1826311-1827809 REVERSE LENGTH=201	AT3G06050.1	AT3G06050.1		25	25	25	84.1	84.1	84.1	21.445	0	267.38	20273000000	373	21.2472	21.8871	21.1496	22.9858	23.926	23.772	24.0596	24.0216
3.61686	2.12196	AT2G22780.1 | Symbols: PMDH1 | peroxisomal NAD-malate dehydrogenase 1 | chr2:9689995-9691923 REVERSE LENGTH=354	AT2G22780.1;AT5G09660.2;AT5G09660.3;AT5G09660.1;AT5G09660.4	AT2G22780.1		24	24	24	85.6	85.6	85.6	37.465	0	323.31	17597000000	446	23.6486	24.2683	24.0008	24.2605	25.5	26.2153	26.4225	26.5282
1.07723	2.1211	AT1G71950.1 | Symbols: | Proteinase inhibitor, propeptide | chr1:27080453-27081573 REVERSE LENGTH=136	AT1G71950.1	AT1G71950.1		9	9	9	64.7	64.7	64.7	14.852	0	156.79	2759900000	90	24.9014	24.7562	20.7936	24.9801	26.0499	25.9653	26.0708	25.8297
2.69084	2.11882	AT4G14570.1 | Symbols: | acylaminoacyl-peptidase-related | chr4:8362586-8366525 FORWARD LENGTH=764	AT4G14570.1	AT4G14570.1		24	24	24	51.8	51.8	51.8	83.937	0	164.3	1431100000	130	22.823	23.1364	22.2521	21.2842	24.5546	24.4284	24.5575	24.4306
5.33389	2.11794	AT4G25370.1 | Symbols: | Double Clp-N motif protein | chr4:12972747-12974580 FORWARD LENGTH=238	AT4G25370.1	AT4G25370.1		8	8	8	46.6	46.6	46.6	26.05	0	35.384	352670000	43	21.1262	21.0825	21.0933	20.8233	23.2711	23.2894	23.2393	22.7972
6.01885	2.11781	AT2G05710.1 | Symbols: ACO3 | aconitase 3 | chr2:2141591-2146350 FORWARD LENGTH=990	AT2G05710.1	AT2G05710.1		84	84	73	72.1	72.1	69.1	108.2	0	323.31	88502000000	1865	25.0052	25.3708	25.0778	25.3257	27.2683	27.1971	27.3376	27.4477
1.66862	2.1164	ATCG00120.1 | Symbols: ATPA | ATP synthase subunit alpha | chrC:9938-11461 REVERSE LENGTH=507	ATCG00120.1	ATCG00120.1		27	26	26	51.5	50.1	50.1	55.328	0	323.31	8469600000	449	21.1026	23.1795	23.4502	24.3012	25.2244	24.8481	25.2736	25.153
1.93782	2.10117	AT3G46440.2 | Symbols: UXS5 | UDP-XYL synthase 5 | chr3:17089268-17091611 REVERSE LENGTH=341;AT3G46440.1 | Symbols: UXS5 | UDP-XYL synthase 5 | chr3:17089268-17091611 REVERSE LENGTH=341	AT3G46440.2;AT3G46440.1	AT3G46440.2;AT3G46440.1		29	7	7	84.5	38.1	38.1	38.389	0	147.97	761220000	63	21.2147	23.0636	20.9527	20.9184	22.8193	23.722	24.075	23.9377
4.31787	2.09074	AT4G00570.1 | Symbols: NAD-ME2 | NAD-dependent malic enzyme 2 | chr4:242817-246522 REVERSE LENGTH=607	AT4G00570.1	AT4G00570.1		44	44	44	85.7	85.7	85.7	66.64	0	323.31	9739700000	508	20.7849	20.6259	20.9591	21.0538	23.0246	22.502	22.8927	23.3673
5.38622	2.08064	AT5G13970.1 | Symbols: | unknown protein;FUNCTIONS IN: molecular_function unknown;INVOLVED IN: biological_process unknown;LOCATED IN: endomembrane system;EXPRESSED IN: 23 plant structures;EXPRESSED DURING: 13 growth stages;BEST Arabidopsis thaliana	AT5G13970.1	AT5G13970.1		5	5	5	22.8	22.8	22.8	45.743	0	22.979	194690000	22	21.0244	20.6742	20.9715	20.9386	23.267	22.753	22.9391	22.9721
1.81914	2.07944	AT2G35010.2 | Symbols: ATO1, TO1 | thioredoxin O1 | chr2:14754398-14755888 FORWARD LENGTH=194;AT2G35010.1 | Symbols: ATO1, TO1 | thioredoxin O1 | chr2:14754398-14755888 FORWARD LENGTH=194	AT2G35010.2;AT2G35010.1	AT2G35010.2;AT2G35010.1		11	11	11	47.9	47.9	47.9	21.191	0	97.242	4027700000	166	21.0256	20.8618	20.9769	20.9269	23.3819	23.6109	21.2043	23.9119
4.49485	2.07894	AT1G31180.1 | Symbols: ATIMD3, IMD3, IPMDH1 | isopropylmalate dehydrogenase 3 | chr1:11142843-11144617 REVERSE LENGTH=404	AT1G31180.1	AT1G31180.1		27	18	13	57.7	43.1	32.7	43.847	0	323.31	9272200000	283	24.2385	24.5896	24.5157	25.0722	26.4801	26.7434	26.8082	26.7
4.14859	2.06464	AT2G35840.3 | Symbols: | Sucrose-6F-phosphate phosphohydrolase family protein | chr2:15053952-15055776 FORWARD LENGTH=422;AT2G35840.2 | Symbols: | Sucrose-6F-phosphate phosphohydrolase family protein | chr2:15053952-15055776 FORWARD LENGTH=422;AT2G35840.	AT2G35840.3;AT2G35840.2;AT2G35840.1	AT2G35840.3;AT2G35840.2;AT2G35840.1		11	11	7	33.6	33.6	28	47.855	0	24.114	352620000	44	21.077	20.5761	20.9567	20.9857	22.5499	22.8092	23.0948	23.4002
5.43797	2.06057	AT5G19140.1 | Symbols: ATAILP1, AILP1 | Aluminium induced protein with YGL and LRDR motifs | chr5:6423398-6425785 FORWARD LENGTH=234;AT5G19140.2 | Symbols: ATAILP1, AILP1 | Aluminium induced protein with YGL and LRDR motifs | chr5:6423398-6425785 FORWARD L	AT5G19140.1;AT5G19140.2	AT5G19140.1;AT5G19140.2		8	8	8	53.4	53.4	53.4	25.015	0	70.496	267220000	42	20.7729	21.0897	20.7176	20.9928	22.7299	23.1134	22.8743	23.0977
2.43458	2.05059	AT5G56630.1 | Symbols: PFK7 | phosphofructokinase 7 | chr5:22924311-22926728 FORWARD LENGTH=485;AT4G26270.1 | Symbols: PFK3 | phosphofructokinase 3 | chr4:13301094-13304030 REVERSE LENGTH=489	AT5G56630.1;AT4G26270.1	AT5G56630.1;AT4G26270.1		16	13	12	55.3	48.5	46.8	53.481	0	71.89	573700000	74	20.8628	22.6533	21.0955	22.2829	23.9768	23.7507	23.7554	23.6138
1.09846	2.04934	AT2G02990.1 | Symbols: RNS1, ATRNS1 | ribonuclease 1 | chr2:873714-874667 FORWARD LENGTH=230	AT2G02990.1	AT2G02990.1		13	13	13	62.6	62.6	62.6	25.396	0	221.12	2165400000	128	20.8377	20.6619	20.9928	20.8382	24.4981	22.6946	20.2143	24.121
2.01355	2.04861	AT5G13490.2 | Symbols: AAC2 | ADP/ATP carrier 2 | chr5:4336034-4337379 FORWARD LENGTH=385;AT5G13490.1 | Symbols: AAC2 | ADP/ATP carrier 2 | chr5:4336034-4337379 FORWARD LENGTH=385	AT5G13490.2;AT5G13490.1	AT5G13490.2;AT5G13490.1		41	41	27	58.2	58.2	48.6	41.745	0	323.31	125010000000	1043	22.108	23.0172	23.766	24.2772	24.6398	25.1448	25.8507	25.7277
4.8314	2.04532	AT5G66090.1 | Symbols: | unknown protein;FUNCTIONS IN: molecular_function unknown;LOCATED IN: chloroplast, chloroplast stroma;EXPRESSED IN: 21 plant structures;EXPRESSED DURING: 13 growth stages;Has 30201 Blast hits to 17322 proteins in 780 species:	AT5G66090.1	AT5G66090.1		7	7	7	43.8	43.8	43.8	22.54	0	51.299	499000000	63	20.8678	20.9262	20.8293	21.0116	22.8348	22.7462	23.4196	22.8156
4.67874	2.04329	AT4G33680.1 | Symbols: AGD2 | Pyridoxal phosphate (PLP)-dependent transferases superfamily protein | chr4:16171847-16174630 REVERSE LENGTH=461	AT4G33680.1	AT4G33680.1		27	27	27	68.5	68.5	68.5	50.396	0	323.31	5714200000	360	23.8671	24.4326	23.8138	24.4237	26.1545	26.2326	26.1813	26.142
3.71779	2.03999	AT1G76180.2 | Symbols: ERD14 | Dehydrin family protein | chr1:28587013-28587657 REVERSE LENGTH=185;AT1G76180.1 | Symbols: ERD14 | Dehydrin family protein | chr1:28587013-28587657 REVERSE LENGTH=185	AT1G76180.2;AT1G76180.1	AT1G76180.2;AT1G76180.1		18	18	17	62.2	62.2	62.2	20.786	0	294.27	6916100000	220	25.2819	25.0492	25.3692	24.7118	27.691	27.1996	26.937	26.7446
1.67936	2.03064	AT1G23820.1 | Symbols: SPDS1 | spermidine synthase 1 | chr1:8420278-8422724 FORWARD LENGTH=378;AT1G23820.2 | Symbols: SPDS1 | spermidine synthase 1 | chr1:8420278-8422480 FORWARD LENGTH=327	AT1G23820.1;AT1G23820.2	AT1G23820.1;AT1G23820.2		15	11	11	51.9	36.2	36.2	41.679	0	84.623	865820000	75	23.2406	23.2716	21.2807	20.8275	24.113	24.1774	23.9394	24.5132
6.42185	2.02913	AT5G10920.1 | Symbols: | L-Aspartase-like family protein | chr5:3441805-3443892 FORWARD LENGTH=517	AT5G10920.1	AT5G10920.1		44	44	44	80.7	80.7	80.7	57.512	0	323.31	14403000000	671	24.7373	24.8577	24.504	24.8463	26.7593	26.7546	26.7127	26.8352
3.52605	2.02532	AT1G71750.1 | Symbols: HGPT | Hypoxanthine-guanine phosphoribosyltransferase | chr1:26987954-26989144 REVERSE LENGTH=188;AT1G71750.2 | Symbols: HGPT | Hypoxanthine-guanine phosphoribosyltransferase | chr1:26987954-26989144 REVERSE LENGTH=198	AT1G71750.1;AT1G71750.2	AT1G71750.1;AT1G71750.2		7	7	7	41.5	41.5	41.5	20.879	0	73.317	304830000	41	20.8967	20.6001	20.9952	21.8023	23.182	23.1034	23.2545	22.8555
1.79974	2.01627	AT2G30410.2 | Symbols: KIS | tubulin folding cofactor A (KIESEL) | chr2:12959812-12960552 FORWARD LENGTH=113;AT2G30410.1 | Symbols: KIS, TFCA | tubulin folding cofactor A (KIESEL) | chr2:12959812-12960552 FORWARD LENGTH=113	AT2G30410.2;AT2G30410.1	AT2G30410.2;AT2G30410.1		12	12	12	83.2	83.2	83.2	12.824	0	119.26	933930000	100	22.7922	20.9408	23.5404	23.1441	25.1069	24.5992	24.1746	24.602
4.98778	2.01147	AT1G80560.1 | Symbols: ATIMD2, IMD2 | isopropylmalate dehydrogenase 2 | chr1:30287833-30290126 FORWARD LENGTH=405	AT1G80560.1	AT1G80560.1		31	31	21	65.2	65.2	50.6	43.37	0	323.31	14027000000	438	24.8435	24.8703	25.0966	25.4742	27.0665	27.0028	27.1186	27.1426
2.36825	1.99453	AT1G03475.1 | Symbols: LIN2, HEMF1, ATCPO-I | Coproporphyrinogen III oxidase | chr1:869302-871175 REVERSE LENGTH=386	AT1G03475.1;AT4G03205.1;AT4G03205.2	AT1G03475.1		14	14	14	53.1	53.1	53.1	43.796	0	121.54	1243200000	128	20.7581	22.4016	21.3702	22.6684	23.7252	23.8833	23.7664	23.8016
5.78312	1.97866	AT1G65960.2 | Symbols: GAD2 | glutamate decarboxylase 2 | chr1:24552094-24557253 FORWARD LENGTH=494;AT1G65960.1 | Symbols: GAD2 | glutamate decarboxylase 2 | chr1:24555868-24557253 FORWARD LENGTH=365	AT1G65960.2;AT1G65960.1	AT1G65960.2;AT1G65960.1		13	9	9	38.1	27.9	27.9	56.14	0	61.579	228720000	32	20.8895	20.93	20.7268	21.0161	23.1055	22.9034	22.7533	22.7149
1.99942	1.97845	AT1G17890.3 | Symbols: GER2 | NAD(P)-binding Rossmann-fold superfamily protein | chr1:6154478-6155440 REVERSE LENGTH=320;AT1G17890.2 | Symbols: GER2 | NAD(P)-binding Rossmann-fold superfamily protein | chr1:6154478-6155440 REVERSE LENGTH=320;AT1G17890.1 |	AT1G17890.3;AT1G17890.2;AT1G17890.1	AT1G17890.3;AT1G17890.2;AT1G17890.1		9	7	7	43.8	38.1	38.1	35.421	0	62.37	290690000	35	23.2257	20.9671	21.2492	21.1457	23.538	23.6427	23.5103	23.8105
2.37118	1.97805	AT2G22570.1 | Symbols: ATNIC1, NIC1 | nicotinamidase 1 | chr2:9589604-9590846 REVERSE LENGTH=244;AT2G22570.2 | Symbols: ATNIC1, NIC1 | nicotinamidase 1 | chr2:9590021-9590846 REVERSE LENGTH=175	AT2G22570.1;AT2G22570.2	AT2G22570.1;AT2G22570.2		6	6	6	38.5	38.5	38.5	27.023	0	34.676	546610000	54	22.5602	22.5921	21.0573	21.2505	24.2302	23.7978	23.4468	23.8976
0.848721	1.96939	AT3G54640.1 | Symbols: TSA1, TRP3 | tryptophan synthase alpha chain | chr3:20223331-20225303 REVERSE LENGTH=312	AT3G54640.1	AT3G54640.1		13	13	13	67.9	67.9	67.9	33.199	0	323.31	3217600000	201	20.8889	24.5179	20.9724	25.062	23.876	25.1033	25.2103	25.1292
2.44435	1.95477	AT3G18060.1 | Symbols: | transducin family protein / WD-40 repeat family protein | chr3:6183880-6186788 FORWARD LENGTH=609	AT3G18060.1;AT2G01330.2;AT2G01330.1	AT3G18060.1		23	23	23	52.9	52.9	52.9	66.041	0	259.42	1462500000	149	22.9909	22.8623	21.2335	22.0127	24.4319	24.3224	23.9423	24.222
3.63993	1.94956	AT5G50370.1 | Symbols: | Adenylate kinase family protein | chr5:20509382-20510631 REVERSE LENGTH=248	AT5G50370.1	AT5G50370.1		24	21	21	74.6	66.5	66.5	27.335	0	323.31	7741400000	265	21.0694	20.7861	21.0515	20.751	22.3619	22.6138	23.0672	23.4134
3.44847	1.94544	AT5G08690.1 | Symbols: | ATP synthase alpha/beta family protein | chr5:2825739-2828352 FORWARD LENGTH=556;AT5G08670.1 | Symbols: | ATP synthase alpha/beta family protein | chr5:2818395-2821149 REVERSE LENGTH=556;AT5G08680.1 | Symbols: | ATP synthase alp	AT5G08690.1;AT5G08670.1;AT5G08680.1	AT5G08690.1;AT5G08670.1;AT5G08680.1		63	63	61	80.9	80.9	80.9	59.712	0	323.31	362620000000	2393	24.5812	24.6771	25.1972	25.4648	26.5159	26.7891	27.1734	27.2236
2.97429	1.94264	AT4G13850.3 | Symbols: ATGRP2 | glycine-rich RNA-binding protein 2 | chr4:8021314-8022065 FORWARD LENGTH=144;AT4G13850.2 | Symbols: ATGRP2 | glycine-rich RNA-binding protein 2 | chr4:8021314-8022065 FORWARD LENGTH=153;AT4G13850.1 | Symbols: ATGRP2, GR-RBP2	AT4G13850.3;AT4G13850.2;AT4G13850.1;AT4G13850.4	AT4G13850.3;AT4G13850.2;AT4G13850.1;AT4G13850.4		9	9	9	51.4	51.4	51.4	14.691	0	323.31	34972000000	279	24.9895	25.3118	25.3522	26.236	27.1585	27.1176	27.9568	27.4271
1.19246	1.93808	AT2G29530.1 | Symbols: TIM10 | Tim10/DDP family zinc finger protein | chr2:12641026-12642243 REVERSE LENGTH=83;AT2G29530.2 | Symbols: TIM10 | Tim10/DDP family zinc finger protein | chr2:12641026-12642243 REVERSE LENGTH=83;AT2G29530.3 | Symbols: TIM10 | Tim	AT2G29530.1;AT2G29530.2;AT2G29530.3	AT2G29530.1;AT2G29530.2;AT2G29530.3		11	11	11	92.8	92.8	92.8	9.3387	0	314.44	3159400000	132	20.8533	20.863	20.9219	20.9174	23.5659	23.6967	20.2628	23.7825
1.99586	1.93279	AT2G41530.1 | Symbols: ATSFGH, SFGH | S-formylglutathione hydrolase | chr2:17323656-17325430 REVERSE LENGTH=284	AT2G41530.1	AT2G41530.1		19	19	19	82.4	82.4	82.4	31.655	0	323.31	5856900000	263	24.0853	24.1226	23.8969	25.0763	26.7936	26.7274	24.8904	26.5008
4.42062	1.93021	AT3G55800.1 | Symbols: SBPASE | sedoheptulose-bisphosphatase | chr3:20709640-20711421 FORWARD LENGTH=393	AT3G55800.1	AT3G55800.1		9	9	9	24.7	24.7	24.7	42.414	0	38.595	331190000	37	20.808	21.2051	21.5817	21.4179	23.044	23.2597	23.322	23.1078
3.20635	1.9246	AT2G07698.1 | Symbols: | ATPase, F1 complex, alpha subunit protein | chr2:3361474-3364028 FORWARD LENGTH=777	AT2G07698.1	AT2G07698.1		55	55	5	44	44	3.3	85.932	0	323.31	206180000000	1567	24.3582	24.3928	24.9875	25.275	26.2418	26.481	27.0367	26.9524
3.88012	1.92274	AT5G15090.2 | Symbols: VDAC3 | voltage dependent anion channel 3 | chr5:4889641-4891389 REVERSE LENGTH=274;AT5G15090.1 | Symbols: VDAC3, ATVDAC3 | voltage dependent anion channel 3 | chr5:4889641-4891389 REVERSE LENGTH=274	AT5G15090.2;AT5G15090.1	AT5G15090.2;AT5G15090.1		25	21	21	67.9	63.1	63.1	29.21	0	323.31	53908000000	539	23.722	23.7326	23.7482	24.2845	25.5767	25.4348	26.1883	25.9785
2.47431	1.91817	AT3G05900.1 | Symbols: | neurofilament protein-related | chr3:1761408-1763854 REVERSE LENGTH=673	AT3G05900.1	AT3G05900.1		23	23	23	57.9	57.9	57.9	73.453	0	229.14	1932600000	167	23.622	23.5863	22.6756	22.2707	25.4912	24.9225	24.366	25.0476
2.6608	1.91645	AT3G21140.1 | Symbols: | Pyridoxamine 5-phosphate oxidase family protein | chr3:7409696-7412086 REVERSE LENGTH=387	AT3G21140.1	AT3G21140.1		23	23	20	68.7	68.7	66.1	42.851	0	269.26	1262800000	105	22.2496	22.1895	21.0166	22.6531	24.1931	23.6155	23.8806	24.0854
2.1944	1.91382	AT3G27240.1 | Symbols: | Cytochrome C1 family | chr3:10056144-10058370 REVERSE LENGTH=307	AT3G27240.1	AT3G27240.1		13	13	8	52.4	52.4	37.8	33.65	0	323.31	17703000000	297	20.9878	20.6256	22.2689	22.5047	23.55	23.6316	23.4594	23.4013
1.41636	1.91211	AT5G13450.1 | Symbols: ATP5 | delta subunit of Mt ATP synthase | chr5:4310558-4311941 REVERSE LENGTH=238;AT5G13450.2 | Symbols: ATP5 | delta subunit of Mt ATP synthase | chr5:4310558-4311941 REVERSE LENGTH=190	AT5G13450.1;AT5G13450.2	AT5G13450.1;AT5G13450.2		29	29	29	77.3	77.3	77.3	26.321	0	323.31	48803000000	520	21.5836	21.7443	22.7899	23.1914	22.9447	23.4634	25.2844	25.2652
4.18952	1.91156	AT1G20620.5 | Symbols: CAT3, SEN2, ATCAT3 | catalase 3 | chr1:7143142-7146193 FORWARD LENGTH=485;AT1G20620.1 | Symbols: CAT3, SEN2, ATCAT3 | catalase 3 | chr1:7143142-7146193 FORWARD LENGTH=492;AT1G20620.2 | Symbols: CAT3, SEN2, ATCAT3 | catalase 3 | chr1:	AT1G20620.5;AT1G20620.1;AT1G20620.2;AT1G20620.4	AT1G20620.5;AT1G20620.1;AT1G20620.2;AT1G20620.4		46	46	35	86.6	86.6	76.7	55.967	0	323.31	70760000000	991	25.8411	26.3357	25.7712	26.3926	28.0227	27.9314	27.757	28.2757
3.1856	1.90828	AT5G64250.1 | Symbols: | Aldolase-type TIM barrel family protein | chr5:25697623-25698752 REVERSE LENGTH=293;AT5G64250.2 | Symbols: | Aldolase-type TIM barrel family protein | chr5:25697623-25698945 REVERSE LENGTH=333	AT5G64250.1;AT5G64250.2	AT5G64250.1;AT5G64250.2		14	14	14	72	72	72	32.09	0	101.14	504490000	72	21.0089	22.2399	21.3472	20.9874	23.2432	23.3742	23.2403	23.3588
1.35001	1.90515	AT4G34215.2 | Symbols: | Domain of unknown function (DUF303) | chr4:16380203-16381192 REVERSE LENGTH=260;AT4G34215.1 | Symbols: | Domain of unknown function (DUF303) | chr4:16380203-16381192 REVERSE LENGTH=260	AT4G34215.2;AT4G34215.1	AT4G34215.2;AT4G34215.1		11	11	11	46.5	46.5	46.5	28.358	0	147.59	760440000	72	23.9822	23.5051	21.3991	20.9721	24.3037	24.4994	24.2118	24.4642
2.60596	1.90265	AT4G27070.1 | Symbols: TSB2 | tryptophan synthase beta-subunit 2 | chr4:13586564-13588619 FORWARD LENGTH=475	AT4G27070.1	AT4G27070.1		20	5	5	51.6	20.6	20.6	51.6	0	62.328	357880000	44	22.4036	20.8693	20.9564	21.0374	22.9048	23.4189	23.2054	23.348
2.03883	1.89747	AT5G14600.1 | Symbols: | S-adenosyl-L-methionine-dependent methyltransferases superfamily protein | chr5:4707518-4709022 FORWARD LENGTH=318	AT5G14600.1	AT5G14600.1		10	10	10	50.9	50.9	50.9	35.441	0	67.842	476490000	74	20.8544	22.5233	21.1671	22.7916	24.139	23.5755	23.6066	23.6052
1.53559	1.89727	AT1G13690.1 | Symbols: ATE1 | ATPase E1 | chr1:4693380-4694179 FORWARD LENGTH=177	AT1G13690.1	AT1G13690.1		8	8	8	57.6	57.6	57.6	19.809	0	76.151	369840000	47	21.0711	23.5813	21.0652	20.7914	23.2327	23.4843	23.812	23.5692
3.43322	1.8947	AT1G09010.1 | Symbols: | glycoside hydrolase family 2 protein | chr1:2895259-2899287 REVERSE LENGTH=944	AT1G09010.1	AT1G09010.1		12	12	12	20.1	20.1	20.1	107.66	0	46.285	323870000	50	20.8772	22.0087	21.1619	20.9509	23.1985	23.0121	23.1742	23.1926
3.1246	1.89374	AT1G79690.1 | Symbols: atnudt3, NUDT3 | nudix hydrolase homolog 3 | chr1:29985360-29990171 FORWARD LENGTH=772	AT1G79690.1	AT1G79690.1		53	53	53	68.1	68.1	68.1	86.856	0	323.31	3723700000	282	23.0658	23.6644	22.9787	22.6257	25.4551	25.0588	24.4356	24.96
1.70511	1.89167	AT1G15500.1 | Symbols: ATNTT2 | TLC ATP/ADP transporter | chr1:5326426-5328688 FORWARD LENGTH=618	AT1G15500.1	AT1G15500.1		15	15	9	24.9	24.9	16.7	67.529	0	323.31	4961100000	187	22.1189	21.1583	21.0476	23.5821	24.108	23.5729	24.0384	23.7543
4.12582	1.89135	AT5G43830.1 | Symbols: | Aluminium induced protein with YGL and LRDR motifs | chr5:17622593-17624239 REVERSE LENGTH=251	AT5G43830.1	AT5G43830.1		16	16	15	80.5	80.5	76.1	27.509	0	205.9	2792900000	164	23.948	24.1216	23.8098	23.7286	25.96	26.213	25.45	25.5503
1.36579	1.89101	AT3G25780.1 | Symbols: AOC3 | allene oxide cyclase 3 | chr3:9409362-9410409 FORWARD LENGTH=258	AT3G25780.1;AT3G25770.1;AT3G25760.1	AT3G25780.1		6	6	5	33.3	33.3	30.2	28.398	0	83.095	919610000	66	21.1822	21.0158	20.9762	20.8426	20.7035	23.6824	23.8138	23.3813
1.91754	1.88991	AT1G35580.1 | Symbols: CINV1 | cytosolic invertase 1 | chr1:13122460-13124808 REVERSE LENGTH=551;AT1G35580.2 | Symbols: CINV1 | cytosolic invertase 1 | chr1:13122460-13124808 REVERSE LENGTH=551;AT1G35580.3 | Symbols: CINV1 | cytosolic invertase 1 | chr1:13	AT1G35580.1;AT1G35580.2;AT1G35580.3	AT1G35580.1;AT1G35580.2;AT1G35580.3		22	22	17	52.8	52.8	44.5	62.834	0	304.28	1927600000	169	23.6953	23.7168	21.5186	23.4575	25.1135	25.0469	24.9322	24.8552
2.56989	1.86953	AT5G64120.1 | Symbols: | Peroxidase superfamily protein | chr5:25659551-25660946 REVERSE LENGTH=328	AT5G64120.1	AT5G64120.1		14	14	14	54.3	54.3	54.3	34.889	0	155.22	582560000	99	21.026	20.908	21.1322	21.1321	23.9865	22.4834	22.3041	22.9024
3.26278	1.86718	AT1G47420.1 | Symbols: SDH5 | succinate dehydrogenase 5 | chr1:17395774-17397176 REVERSE LENGTH=257	AT1G47420.1	AT1G47420.1		17	17	17	53.3	53.3	53.3	28.106	0	323.31	15849000000	272	21.0372	20.2313	21.2879	21.0674	22.522	22.4846	23.0137	23.0723
5.35717	1.86391	AT5G13310.1 | Symbols: | unknown protein;FUNCTIONS IN: molecular_function unknown;INVOLVED IN: biological_process unknown;LOCATED IN: chloroplast;EXPRESSED IN: 13 plant structures;EXPRESSED DURING: 7 growth stages;BEST Arabidopsis thaliana protein m	AT5G13310.1	AT5G13310.1		6	6	6	24.9	24.9	24.9	41.056	0	28.691	246210000	47	20.9823	21.0396	21.1621	21.1228	23.2048	22.9284	22.9726	22.6567
4.74904	1.86333	AT5G52520.1 | Symbols: OVA6, PRORS1 | Class II aaRS and biotin synthetases superfamily protein | chr5:21311112-21313875 FORWARD LENGTH=543	AT5G52520.1	AT5G52520.1		24	24	24	57.8	57.8	57.8	60.746	0	265.6	1275300000	136	20.7614	20.8413	21.1261	20.9496	23.1285	22.5423	22.633	22.828
3.13852	1.8625	AT2G02390.1 | Symbols: ATGSTZ1, GST18, GSTZ1 | glutathione S-transferase zeta 1 | chr2:629015-630955 FORWARD LENGTH=221;AT2G02390.2 | Symbols: ATGSTZ1, GST18, GSTZ1 | glutathione S-transferase zeta 1 | chr2:629015-630607 FORWARD LENGTH=191;AT2G02390.3 | Sy	AT2G02390.1;AT2G02390.2;AT2G02390.3;AT2G02380.1	AT2G02390.1;AT2G02390.2;AT2G02390.3		11	11	11	57.9	57.9	57.9	24.887	0	260.54	2535100000	87	24.0872	24.8539	24.4052	23.4931	26.0836	26.1373	25.8762	26.1923
5.22086	1.84679	AT5G20720.3 | Symbols: CPN20 | chaperonin 20 | chr5:7015015-7016354 FORWARD LENGTH=253;AT5G20720.2 | Symbols: CPN20, CPN10, CHCPN10, ATCPN21, CPN21 | chaperonin 20 | chr5:7015015-7016354 FORWARD LENGTH=253;AT5G20720.1 | Symbols: CPN20, CPN10, CHCPN10, ATCP	AT5G20720.3;AT5G20720.2;AT5G20720.1	AT5G20720.3;AT5G20720.2;AT5G20720.1		22	22	22	76.3	76.3	76.3	26.802	0	323.31	43048000000	556	26.9425	27.1629	27.0059	27.3577	29.1857	28.8189	29.0007	28.8508
1.24571	1.84023	AT5G66760.1 | Symbols: SDH1-1 | succinate dehydrogenase 1-1 | chr5:26653776-26657224 FORWARD LENGTH=634	AT5G66760.1;AT2G18450.1	AT5G66760.1		43	43	43	69.7	69.7	69.7	69.656	0	323.31	20154000000	572	20.8276	20.7139	20.9727	21.1208	20.5299	22.9726	23.3735	24.1199
1.16298	1.83906	AT3G55410.1 | Symbols: | 2-oxoglutarate dehydrogenase, E1 component | chr3:20541897-20545728 FORWARD LENGTH=1017	AT3G55410.1	AT3G55410.1		86	86	71	64.1	64.1	55.1	115.16	0	323.31	44377000000	1230	17.8963	19.5178	21.1181	20.62	20.6424	21.2663	22.0189	22.5808
3.45007	1.83881	AT3G55260.1 | Symbols: HEXO1, ATHEX2 | beta-hexosaminidase 1 | chr3:20489317-20492858 FORWARD LENGTH=541	AT3G55260.1	AT3G55260.1		19	19	18	54.2	54.2	52.7	61.229	0	131.69	866310000	105	21.6158	22.5113	22.3925	22.1172	24.227	24.2332	23.5598	23.9721
2.12023	1.83571	AT5G14540.1 | Symbols: | Protein of unknown function (DUF1421) | chr5:4687333-4689624 REVERSE LENGTH=547	AT5G14540.1	AT5G14540.1		15	15	15	36.7	36.7	36.7	59.097	0	71.937	603580000	78	22.4594	22.5096	20.8991	21.1617	24.1039	23.6767	23.2529	23.3391
5.15239	1.8314	AT2G22250.1 | Symbols: ATAAT, AAT, MEE17 | aspartate aminotransferase | chr2:9458011-9460028 REVERSE LENGTH=428;AT2G22250.3 | Symbols: ATAAT, AAT, MEE17 | aspartate aminotransferase | chr2:9458011-9460297 REVERSE LENGTH=475;AT2G22250.2 | Symbols: ATAAT, AA	AT2G22250.1;AT2G22250.3;AT2G22250.2	AT2G22250.1;AT2G22250.3;AT2G22250.2		32	32	32	68.7	68.7	68.7	46.038	0	323.31	9915000000	474	24.0449	24.3929	24.2668	24.2213	26.3634	25.981	26.0282	25.879
2.96122	1.83083	AT3G61440.1 | Symbols: ATCYSC1, ARATH;BSAS3;1, CYSC1 | cysteine synthase C1 | chr3:22735885-22737792 FORWARD LENGTH=368	AT3G61440.1;AT3G61440.2;AT3G61440.3	AT3G61440.1		20	20	20	46.7	46.7	46.7	39.927	0	319.55	2684600000	165	21.1779	20.9078	20.9028	20.683	21.9481	22.7616	22.9215	23.3636
4.21969	1.82858	AT3G01280.1 | Symbols: VDAC1, ATVDAC1 | voltage dependent anion channel 1 | chr3:85754-87612 FORWARD LENGTH=276	AT3G01280.1	AT3G01280.1		30	30	26	80.4	80.4	75.7	29.425	0	323.31	70578000000	645	24.0426	23.8174	24.0808	24.6183	26.0013	25.7655	26.1006	26.0062
5.93827	1.82786	AT3G57610.1 | Symbols: ADSS | adenylosuccinate synthase | chr3:21334519-21336603 REVERSE LENGTH=490	AT3G57610.1	AT3G57610.1		32	32	32	65.9	65.9	65.9	52.964	0	323.31	20418000000	650	24.9454	25.2011	25.0776	25.2832	26.9696	26.7886	27.023	27.0376
3.06081	1.81624	AT5G12040.1 | Symbols: | Nitrilase/cyanide hydratase and apolipoprotein N-acyltransferase family protein | chr5:3885162-3887772 FORWARD LENGTH=369;AT5G12040.2 | Symbols: | Nitrilase/cyanide hydratase and apolipoprotein N-acyltransferase family protein |	AT5G12040.1;AT5G12040.2	AT5G12040.1;AT5G12040.2		21	21	21	58.5	58.5	58.5	40.33	0	323.31	2099100000	200	22.9531	22.9336	22.0656	23.3005	24.8938	24.4495	24.3415	24.8328
3.29005	1.80993	AT4G21580.1 | Symbols: | oxidoreductase, zinc-binding dehydrogenase family protein | chr4:11475822-11477514 FORWARD LENGTH=325;AT4G21580.3 | Symbols: | oxidoreductase, zinc-binding dehydrogenase family protein | chr4:11475822-11477514 FORWARD LENGTH=319;	AT4G21580.1;AT4G21580.3;AT4G21580.2	AT4G21580.1;AT4G21580.3;AT4G21580.2		18	18	18	65.2	65.2	65.2	34.465	0	193.91	1947500000	124	23.5605	23.8327	23.3329	23.3541	25.8005	25.5127	24.6635	25.3432
2.39324	1.80654	AT3G12800.1 | Symbols: SDRB, DECR | short-chain dehydrogenase-reductase B | chr3:4063463-4064757 REVERSE LENGTH=298	AT3G12800.1;AT2G07640.1	AT3G12800.1		18	18	18	67.1	67.1	67.1	31.796	0	323.31	4625100000	189	21.283	20.6832	21.3062	21.0776	21.921	23.5386	22.7003	23.4162
2.04697	1.80621	AT5G63860.1 | Symbols: UVR8 | Regulator of chromosome condensation (RCC1) family protein | chr5:25554821-25558587 REVERSE LENGTH=440	AT5G63860.1	AT5G63860.1		13	13	13	34.5	34.5	34.5	47.118	0	89.724	573740000	76	23.0168	22.95	21.0286	22.5328	24.4823	24.1213	23.9875	24.1619
0.838448	1.80529	AT2G24940.1 | Symbols: AtMAPR2, MAPR2 | membrane-associated progesterone binding protein 2 | chr2:10609447-10609749 FORWARD LENGTH=100	AT2G24940.1	AT2G24940.1		9	9	9	87	87	87	11.031	0	159.28	1598800000	55	24.8775	20.484	24.7578	24.7255	25.6	25.5367	25.5994	25.33
1.18224	1.80173	AT1G15120.1 | Symbols: | Ubiquinol-cytochrome C reductase hinge protein | chr1:5203091-5203897 FORWARD LENGTH=69;AT1G15120.2 | Symbols: | Ubiquinol-cytochrome C reductase hinge protein | chr1:5202648-5203950 FORWARD LENGTH=166	AT1G15120.1;AT1G15120.2;AT2G01090.2;AT2G01090.1	AT1G15120.1;AT1G15120.2		7	7	7	76.8	76.8	76.8	7.9832	0	87.986	2535400000	93	20.8892	20.861	20.8564	20.8283	23.6969	23.3803	20.269	23.2956
2.62264	1.80118	AT5G38470.1 | Symbols: RAD23D | Rad23 UV excision repair protein family | chr5:15404720-15407500 FORWARD LENGTH=378	AT5G38470.1;AT5G38470.2	AT5G38470.1		13	13	12	37	37	34.7	40.066	0	275.73	5904100000	168	25.4671	25.0224	25.8142	25.303	27.6282	27.5	26.2579	27.4253
2.91938	1.79914	AT5G21274.1 | Symbols: CAM6, ACAM-6 | calmodulin 6 | chr5:7214740-7215950 REVERSE LENGTH=149;AT3G56800.1 | Symbols: CAM3, acam-3 | calmodulin 3 | chr3:21034981-21035920 REVERSE LENGTH=149;AT3G43810.1 | Symbols: CAM7 | calmodulin 7 | chr3:15664619-15666355	AT5G21274.1;AT3G56800.1;AT3G43810.1;AT2G41110.1;AT2G27030.1;AT2G27030.3;AT2G41110.2;AT2G27030.2	AT5G21274.1;AT3G56800.1;AT3G43810.1;AT2G41110.1;AT2G27030.1;AT2G27030.3;AT2G41110.2;AT2G27030.2		12	12	5	89.9	89.9	64.4	16.833	0	234.66	5576100000	100	24.6837	25.124	24.5799	24.2268	26.9188	26.7104	25.7597	26.4221
3.80634	1.79724	AT2G13560.1 | Symbols: NAD-ME1 | NAD-dependent malic enzyme 1 | chr2:5650089-5655103 FORWARD LENGTH=623	AT2G13560.1	AT2G13560.1		32	32	32	61.3	61.3	61.3	69.655	0	323.31	5944700000	373	20.7741	20.9112	20.9878	20.9611	22.1192	22.7027	23.0541	22.9471
4.68128	1.7935	AT5G57490.1 | Symbols: VDAC4, ATVDAC4 | voltage dependent anion channel 4 | chr5:23283895-23285335 REVERSE LENGTH=274	AT5G57490.1	AT5G57490.1		19	19	19	67.5	67.5	67.5	29.505	0	323.31	10697000000	218	21.1536	20.9052	21.2335	20.8451	22.8772	22.6481	22.6474	23.1388
3.02656	1.78614	AT4G17260.1 | Symbols: | Lactate/malate dehydrogenase family protein | chr4:9674057-9675309 FORWARD LENGTH=353	AT4G17260.1	AT4G17260.1		15	15	15	58.6	58.6	58.6	37.95	0	310.25	977770000	114	21.8773	22.7724	22.29	22.8462	23.6611	24.3784	24.43	24.4608
3.44107	1.78498	AT1G62820.1 | Symbols: | Calcium-binding EF-hand family protein | chr1:23263822-23264268 REVERSE LENGTH=148	AT1G62820.1	AT1G62820.1		22	22	11	96.6	96.6	70.3	16.579	0	323.31	11384000000	345	26.0785	25.971	25.5551	24.9994	27.4925	27.4352	27.4886	27.3276
2.08312	1.78145	AT4G16660.1 | Symbols: | heat shock protein 70 (Hsp 70) family protein | chr4:9377225-9381232 FORWARD LENGTH=867	AT4G16660.1	AT4G16660.1		29	29	29	38.4	38.4	38.4	96.724	0	207.84	1308200000	141	21.0304	22.002	20.7952	21.3898	24.1605	22.4037	22.9789	22.8
1.24192	1.75915	AT1G70410.3 | Symbols: ATBCA4, BCA4 | beta carbonic anhydrase 4 | chr1:26534167-26536505 REVERSE LENGTH=258;AT1G70410.1 | Symbols: ATBCA4, BCA4, CA4 | beta carbonic anhydrase 4 | chr1:26534167-26536505 REVERSE LENGTH=258;AT1G70410.2 | Symbols: ATBCA4, BCA4	AT1G70410.3;AT1G70410.1;AT1G70410.2;AT1G23730.1	AT1G70410.3;AT1G70410.1;AT1G70410.2		11	11	11	52.7	52.7	52.7	28.412	0	137.75	538470000	57	23.4012	23.4832	20.8555	20.8629	24.0675	23.8139	23.7558	24.0022
4.62199	1.75784	AT4G12910.1 | Symbols: scpl20 | serine carboxypeptidase-like 20 | chr4:7550576-7553051 REVERSE LENGTH=497	AT4G12910.1;AT3G25420.1	AT4G12910.1		10	10	10	28.4	28.4	28.4	55.832	0	59.708	415330000	58	21.2571	21.4405	21.0104	20.9474	23.1695	22.8928	22.6887	22.9357
5.89406	1.75587	AT3G01590.2 | Symbols: | Galactose mutarotase-like superfamily protein | chr3:226647-228346 FORWARD LENGTH=306;AT3G01590.1 | Symbols: | Galactose mutarotase-like superfamily protein | chr3:226647-228346 FORWARD LENGTH=306	AT3G01590.2;AT3G01590.1	AT3G01590.2;AT3G01590.1		10	10	10	56.2	56.2	56.2	34.738	0	55.588	186550000	36	21.0602	20.8699	21.1466	21.005	22.8855	22.6164	22.9035	22.6998
1.42166	1.75493	AT4G14930.1 | Symbols: | Survival protein SurE-like phosphatase/nucleotidase | chr4:8538831-8541205 FORWARD LENGTH=315	AT4G14930.1	AT4G14930.1		10	10	10	41	41	41	34.121	0	140.45	941960000	56	23.6197	23.7315	21.0848	23.5491	25.0449	24.5724	24.3494	25.0382
1.29714	1.75396	AT2G35450.1 | Symbols: | catalytics;hydrolases | chr2:14903201-14905361 REVERSE LENGTH=346	AT2G35450.1	AT2G35450.1		12	12	12	54	54	54	38.163	0	50.229	314810000	41	20.6827	20.7075	21.2895	20.9315	20.5508	23.1831	23.4827	23.4104
1.70246	1.7503	AT4G27490.1 | Symbols: | 3-5-exoribonuclease family protein | chr4:13739961-13741647 FORWARD LENGTH=256	AT4G27490.1	AT4G27490.1		3	3	3	20.7	20.7	20.7	27.448	0	31.81	299300000	28	23.0399	20.7335	21.1803	20.6916	23.1564	23.0425	23.1896	23.2581
5.84091	1.74584	AT5G44110.2 | Symbols: ATPOP1, ATNAP2, POP1 | P-loop containing nucleoside triphosphate hydrolases superfamily protein | chr5:17754424-17755672 REVERSE LENGTH=214;AT5G44110.3 | Symbols: ATPOP1, ATNAP2, POP1 | P-loop containing nucleoside triphosphate hydro	AT5G44110.2;AT5G44110.3;AT5G44110.1;AT1G03905.1	AT5G44110.2;AT5G44110.3;AT5G44110.1		3	3	3	31.8	31.8	31.8	23.828	0	19.529	110920000	22	21.0321	20.9032	20.9588	20.9561	22.5385	22.9565	22.6931	22.6455
1.29899	1.74547	AT3G15020.1 | Symbols: mMDH2 | Lactate/malate dehydrogenase family protein | chr3:5056139-5057941 FORWARD LENGTH=341;AT3G15020.2 | Symbols: mMDH2 | Lactate/malate dehydrogenase family protein | chr3:5056139-5057865 FORWARD LENGTH=316	AT3G15020.1;AT3G15020.2	AT3G15020.1;AT3G15020.2		19	11	11	72.1	58.4	58.4	35.875	0	323.31	6858500000	225	20.6744	21.164	20.9081	21.3162	20.888	22.4927	23.7644	23.8996
4.27806	1.74068	AT5G10560.1 | Symbols: | Glycosyl hydrolase family protein | chr5:3336335-3339351 REVERSE LENGTH=792	AT5G10560.1	AT5G10560.1		24	24	24	36.2	36.2	36.2	87.184	0	180.63	1106600000	145	22.1282	22.4795	22.163	21.8222	23.6205	24.021	24.0919	23.8221
5.06554	1.73336	AT5G25940.1 | Symbols: | early nodulin-related | chr5:9054252-9055151 REVERSE LENGTH=115	AT5G25940.1	AT5G25940.1		2	2	2	30.4	30.4	30.4	12.269	0	123.22	4087700000	77	21.0398	20.8004	21.2656	21.1222	22.9181	22.6112	22.9225	22.7097
4.87223	1.73094	AT4G04770.1 | Symbols: ATABC1, LAF6, ATNAP1, ABC1 | ATP binding cassette protein 1 | chr4:2427998-2429785 REVERSE LENGTH=557	AT4G04770.1	AT4G04770.1		14	14	14	37.7	37.7	37.7	61.867	0	103.56	370000000	52	20.8742	20.8518	21.1812	20.9285	22.8465	22.3611	22.7696	22.7822
1.79794	1.72719	AT1G03350.1 | Symbols: | BSD domain-containing protein | chr1:822834-824246 REVERSE LENGTH=470	AT1G03350.1	AT1G03350.1		7	7	7	36	36	36	51.895	0	96.598	436160000	50	22.6598	22.9421	21.379	20.7677	23.7355	23.7593	23.5984	23.5641
4.04241	1.72312	AT5G39570.1 | Symbols: | FUNCTIONS IN: molecular_function unknown;INVOLVED IN: biological_process unknown;LOCATED IN: cytosol, nucleus;EXPRESSED IN: 25 plant structures;EXPRESSED DURING: 14 growth stages;BEST Arabidopsis thaliana protein match is: gl	AT5G39570.1	AT5G39570.1		14	14	14	70.3	70.3	70.3	43.526	0	323.31	10310000000	289	25.8515	25.9341	25.6731	25.5441	27.9528	27.3876	27.3507	27.2042
4.58165	1.7184	AT1G71170.1 | Symbols: | 6-phosphogluconate dehydrogenase family protein | chr1:26830673-26831572 FORWARD LENGTH=299	AT1G71170.1	AT1G71170.1		8	8	7	51.8	51.8	48.5	31.438	0	56.797	138260000	26	20.7812	20.8082	20.8018	21.1668	22.356	22.6472	22.912	22.5163
4.21985	1.71169	AT4G37000.1 | Symbols: ACD2, ATRCCR | accelerated cell death 2 (ACD2) | chr4:17442627-17443762 FORWARD LENGTH=319	AT4G37000.1	AT4G37000.1		15	15	15	48.6	48.6	48.6	36.448	0	99.832	297910000	57	21.0971	20.6024	21.2371	20.8225	22.8893	22.4083	22.6601	22.6482
2.07933	1.70596	AT3G27430.2 | Symbols: PBB1 | N-terminal nucleophile aminohydrolases (Ntn hydrolases) superfamily protein | chr3:10152910-10155052 FORWARD LENGTH=273;AT3G27430.3 | Symbols: PBB1 | N-terminal nucleophile aminohydrolases (Ntn hydrolases) superfamily protein	AT3G27430.2;AT3G27430.3;AT3G27430.1	AT3G27430.2;AT3G27430.3;AT3G27430.1		13	13	4	59	59	20.1	29.555	0	267.09	3153200000	108	25.0451	25.2347	24.5674	24.5197	27.2593	26.959	25.4121	26.5603
5.76689	1.70565	AT3G25530.1 | Symbols: GHBDH, ATGHBDH, GLYR1, GR1 | glyoxylate reductase 1 | chr3:9271949-9273514 REVERSE LENGTH=289;AT3G25530.2 | Symbols: GHBDH, ATGHBDH, GLYR1, GR1 | glyoxylate reductase 1 | chr3:9271949-9273514 REVERSE LENGTH=278	AT3G25530.1;AT3G25530.2	AT3G25530.1;AT3G25530.2		21	21	21	73.4	73.4	73.4	30.691	0	323.31	2989100000	154	24.6618	24.6676	24.4137	24.594	26.1256	26.3581	26.2245	26.4514
4.94714	1.70498	AT3G61110.1 | Symbols: ARS27A, RS27A | ribosomal protein S27 | chr3:22611710-22612632 FORWARD LENGTH=86;AT2G45710.1 | Symbols: | Zinc-binding ribosomal protein family protein | chr2:18831243-18831999 FORWARD LENGTH=84	AT3G61110.1;AT2G45710.1;AT3G61111.1	AT3G61110.1;AT2G45710.1		9	9	7	51.2	51.2	34.9	9.6001	0	86.712	3899400000	178	24.4926	24.3654	24.731	24.6176	26.1116	26.5377	26.272	26.1051
4.35197	1.69847	AT1G48170.1 | Symbols: | unknown protein;Has 78 Blast hits to 78 proteins in 34 species: Archae - 0;Bacteria - 0;Metazoa - 30;Fungi - 0;Plants - 48;Viruses - 0;Other Eukaryotes - 0 (source: NCBI BLink). | chr1:17788810-17789635 FORWARD LENGTH=153	AT1G48170.1	AT1G48170.1		6	6	6	60.1	60.1	60.1	16.597	0	31.032	202190000	29	20.8814	20.801	21.2636	20.6769	22.6555	22.8124	22.3263	22.6226
2.40498	1.6902	AT1G47710.1 | Symbols: | Serine protease inhibitor (SERPIN) family protein | chr1:17558271-17560061 FORWARD LENGTH=391	AT1G47710.1	AT1G47710.1		15	15	15	66	66	66	42.639	0	66.603	475250000	72	22.0336	22.4616	21.0136	20.9772	23.3594	23.2802	23.3006	23.3066
1.46624	1.68598	AT1G66080.1 | Symbols: | unknown protein;CONTAINS InterPro DOMAIN/s: Protein of unknown function DUF775 (InterPro:IPR008493);Has 285 Blast hits to 283 proteins in 133 species: Archae - 0;Bacteria - 0;Metazoa - 120;Fungi - 88;Plants - 50;Viruses - 0	AT1G66080.1	AT1G66080.1		7	7	7	35.8	35.8	35.8	21.097	0	46.257	433190000	56	22.8893	22.9182	20.8784	20.7046	23.2985	23.6673	23.6863	23.4822
1.19731	1.67524	AT1G12050.1 | Symbols: | fumarylacetoacetase, putative | chr1:4072904-4075856 FORWARD LENGTH=421	AT1G12050.1	AT1G12050.1		8	8	8	31.4	31.4	31.4	46.095	0	63.63	306150000	43	20.826	20.6213	21.2093	21.1946	20.4715	23.288	23.4574	23.3352
3.13781	1.66999	AT1G51560.1 | Symbols: | Pyridoxamine 5-phosphate oxidase family protein | chr1:19119900-19121859 REVERSE LENGTH=392	AT1G51560.1	AT1G51560.1		17	14	14	57.4	54.8	54.8	43.582	0	323.31	5861100000	222	23.5439	23.612	23.895	24.4811	25.2048	25.3877	25.7421	25.8773
4.45209	1.66844	AT1G07020.1 | Symbols: | unknown protein;Has 39 Blast hits to 39 proteins in 17 species: Archae - 0;Bacteria - 0;Metazoa - 6;Fungi - 3;Plants - 28;Viruses - 0;Other Eukaryotes - 2 (source: NCBI BLink). | chr1:2155319-2155884 REVERSE LENGTH=147	AT1G07020.1	AT1G07020.1		4	4	4	24.5	24.5	24.5	16.51	0	43.382	73140000	15	21.0887	20.5714	21.0031	20.9241	22.6673	22.5877	22.7349	22.271
1.19047	1.66716	AT3G13470.1 | Symbols: | TCP-1/cpn60 chaperonin family protein | chr3:4389685-4392624 FORWARD LENGTH=596	AT3G13470.1	AT3G13470.1		56	17	17	70.3	29.2	29.2	63.341	0	323.31	4371200000	202	20.8469	23.0928	22.9458	24.3212	24.8986	24.4329	24.1545	24.3893
2.23642	1.66638	AT3G08580.2 | Symbols: AAC1 | ADP/ATP carrier 1 | chr3:2605706-2607030 REVERSE LENGTH=381;AT3G08580.1 | Symbols: AAC1 | ADP/ATP carrier 1 | chr3:2605706-2607030 REVERSE LENGTH=381	AT3G08580.2;AT3G08580.1	AT3G08580.2;AT3G08580.1		40	27	26	57.7	51.7	49.6	41.475	0	323.31	86679000000	543	23.2792	23.734	24.2585	24.923	25.3886	25.4176	26.1172	25.9368
1.02367	1.64718	AT3G56240.1 | Symbols: CCH | copper chaperone | chr3:20863460-20864402 REVERSE LENGTH=121	AT3G56240.1	AT3G56240.1		16	16	16	79.3	79.3	79.3	12.971	0	300.01	1803100000	99	21.0918	24.6962	24.0681	24.0651	25.5828	25.2733	24.8727	24.7813
3.90097	1.64207	AT1G48420.1 | Symbols: D-CDES, ATACD1, ACD1 | D-cysteine desulfhydrase | chr1:17896767-17898803 REVERSE LENGTH=401	AT1G48420.1	AT1G48420.1		24	24	24	69.8	69.8	69.8	43.9	0	161.55	1476500000	149	22.969	23.1783	23.4979	22.9603	25.0977	24.6558	24.4762	24.944
1.26013	1.63331	ATMG00480.1 | Symbols: ORFB, ATP8 | Plant mitochondrial ATPase, F0 complex, subunit 8 protein | chrM:129909-130385 FORWARD LENGTH=158;AT2G07707.1 | Symbols: | Plant mitochondrial ATPase, F0 complex, subunit 8 protein | chr2:3386292-3386768 FORWARD LENGTH=	ATMG00480.1;AT2G07707.1	ATMG00480.1;AT2G07707.1		13	13	13	63.9	63.9	63.9	18.211	0	259.61	7698800000	187	20.7278	21.0776	20.6741	20.7902	22.3705	20.5555	23.5274	23.3495
2.50935	1.6311	AT3G61540.1 | Symbols: | alpha/beta-Hydrolases superfamily protein | chr3:22773399-22775699 FORWARD LENGTH=515	AT3G61540.1	AT3G61540.1		18	18	18	48.5	48.5	48.5	57.585	0	219.83	1352300000	174	23.4524	23.5641	22.1002	22.7946	24.6751	24.6503	24.4583	24.652
5.73028	1.6309	AT1G32060.1 | Symbols: PRK | phosphoribulokinase | chr1:11532668-11534406 FORWARD LENGTH=395	AT1G32060.1	AT1G32060.1		4	4	4	14.7	14.7	14.7	44.463	0	17.061	176000000	31	20.9354	20.9423	20.8246	21.0666	22.455	22.6858	22.431	22.7207
0.618585	1.63051	AT5G13430.1 | Symbols: | Ubiquinol-cytochrome C reductase iron-sulfur subunit | chr5:4305414-4307399 REVERSE LENGTH=272;AT5G13440.1 | Symbols: | Ubiquinol-cytochrome C reductase iron-sulfur subunit | chr5:4308431-4310022 REVERSE LENGTH=274	AT5G13430.1;AT5G13440.1	AT5G13430.1;AT5G13440.1		11	11	11	32.4	32.4	32.4	29.607	0	189.11	8133300000	123	20.7329	20.8449	20.8875	20.9218	20.477	24.3521	20.1656	24.9145
3.87717	1.6232	AT1G70730.1 | Symbols: PGM2 | Phosphoglucomutase/phosphomannomutase family protein | chr1:26669020-26672726 REVERSE LENGTH=585;AT1G70730.3 | Symbols: PGM2 | Phosphoglucomutase/phosphomannomutase family protein | chr1:26669020-26673166 REVERSE LENGTH=662;AT	AT1G70730.1;AT1G70730.3;AT1G70730.2	AT1G70730.1;AT1G70730.3;AT1G70730.2		44	44	29	82.2	82.2	55	63.481	0	323.31	6655100000	419	24.4629	24.2492	24.336	23.8419	26.1471	25.9098	25.8144	25.5116
0.777129	1.62246	AT3G26340.1 | Symbols: | N-terminal nucleophile aminohydrolases (Ntn hydrolases) superfamily protein | chr3:9650600-9652572 REVERSE LENGTH=273	AT3G26340.1	AT3G26340.1		14	5	5	75.1	44	44	29.485	0	68.903	1217200000	53	24.9607	24.8151	20.8809	25.1758	25.819	25.4058	25.4976	25.5998
0.592555	1.61861	AT1G52570.1 | Symbols: PLDALPHA2 | phospholipase D alpha 2 | chr1:19583940-19586551 REVERSE LENGTH=810	AT1G52570.1	AT1G52570.1		14	4	4	13	3.1	3.1	91.597	0	219.14	2390400000	57	26.0509	26.1941	25.7556	20.9148	26.1108	26.8141	26.0013	26.4637
2.75645	1.60642	AT3G23400.1 | Symbols: FIB4 | Plastid-lipid associated protein PAP / fibrillin family protein | chr3:8376636-8378225 REVERSE LENGTH=284	AT3G23400.1	AT3G23400.1		9	9	9	39.1	39.1	39.1	30.454	0	111.45	1070200000	130	20.8809	21.1794	22.1391	20.8885	22.7626	22.8779	22.8982	22.9749
1.99521	1.60197	AT3G16990.1 | Symbols: | Haem oxygenase-like, multi-helical | chr3:5795937-5796783 REVERSE LENGTH=221	AT3G16990.1	AT3G16990.1		11	11	11	49.3	49.3	49.3	25.07	0	71.445	194370000	29	20.7794	22.5872	20.8001	21.2409	22.7818	23.1679	22.982	22.8837
1.79535	1.60124	AT2G33840.1 | Symbols: | Tyrosyl-tRNA synthetase, class Ib, bacterial/mitochondrial | chr2:14315011-14317329 FORWARD LENGTH=385	AT2G33840.1	AT2G33840.1		18	15	15	61.6	54	54	43.897	0	150.07	825150000	105	22.8083	23.0487	21.0087	22.587	23.8767	24.1853	23.6024	24.1933
4.99907	1.59657	AT2G44650.1 | Symbols: CHL-CPN10, CPN10 | chloroplast chaperonin 10 | chr2:18419521-18420510 REVERSE LENGTH=139	AT2G44650.1	AT2G44650.1		11	11	10	61.9	61.9	61.9	15.049	0	323.31	7218700000	216	24.9625	25.0117	25.1112	25.459	26.7594	26.6424	26.8154	26.7135
1.32473	1.5938	AT4G08900.1 | Symbols: | arginase | chr4:5703499-5705180 FORWARD LENGTH=342	AT4G08900.1;AT4G08870.2;AT4G08870.1	AT4G08900.1		17	17	17	72.5	72.5	72.5	37.344	0	323.31	2544800000	120	21.0084	20.8217	20.9902	20.5307	20.6188	22.542	23.4118	23.1536
4.051	1.59346	AT5G20500.1 | Symbols: | Glutaredoxin family protein | chr5:6938652-6939665 FORWARD LENGTH=135	AT5G20500.1	AT5G20500.1		9	9	9	56.3	56.3	56.3	14.827	0	323.31	8616100000	196	25.4842	25.1575	25.3802	25.5228	27.3449	26.9692	26.6057	26.9987
1.87384	1.59188	AT3G14940.1 | Symbols: ATPPC3, PPC3 | phosphoenolpyruvate carboxylase 3 | chr3:5025584-5029476 FORWARD LENGTH=968	AT3G14940.1	AT3G14940.1		52	16	16	58.1	30.3	30.3	110.16	0	57.032	498760000	63	20.931	22.6766	21.216	21.1812	23.7809	22.7813	22.9021	22.9079
2.33643	1.59051	AT5G06730.1 | Symbols: | Peroxidase superfamily protein | chr5:2080207-2081621 REVERSE LENGTH=358	AT5G06730.1;AT4G36430.1	AT5G06730.1		4	4	3	16.2	16.2	16.2	37.29	0	78.511	229420000	37	20.9997	22.08	21.8337	20.8462	23.54	23.1228	22.648	22.8108
0.519135	1.58376	AT1G20340.1 | Symbols: DRT112, PETE2 | Cupredoxin superfamily protein | chr1:7042770-7043273 REVERSE LENGTH=167	AT1G20340.1	AT1G20340.1		3	3	3	41.3	41.3	41.3	16.984	0	45.908	1422400000	75	21.2135	23.7643	23.9545	20.9012	20.6219	25.477	24.9085	25.1611
4.64484	1.58318	AT4G05420.1 | Symbols: DDB1A | damaged DNA binding protein 1A | chr4:2746288-2752663 FORWARD LENGTH=1088;AT4G05420.2 | Symbols: DDB1A | damaged DNA binding protein 1A | chr4:2746288-2752663 FORWARD LENGTH=1067	AT4G05420.1;AT4G05420.2	AT4G05420.1;AT4G05420.2		22	22	15	25.5	25.5	19.1	121.3	0	77.844	390540000	78	21.0976	20.9972	21.2424	21.1107	22.3751	22.875	22.6205	22.9101
3.19247	1.57849	AT5G17560.1 | Symbols: | BolA-like family protein | chr5:5788474-5789671 FORWARD LENGTH=177	AT5G17560.1	AT5G17560.1		7	7	7	47.5	47.5	47.5	19.538	0	248.3	4201900000	139	23.023	23.5694	23.0529	23.8475	24.6866	24.8032	25.3096	25.0074
2.12409	1.56591	AT3G47000.1 | Symbols: | Glycosyl hydrolase family protein | chr3:17313811-17316539 REVERSE LENGTH=608	AT3G47000.1;AT3G47010.2;AT3G47010.1;AT3G47040.1;AT3G47040.2	AT3G47000.1		15	14	14	34.4	32.7	32.7	66.308	0	45.53	253020000	51	22.4648	20.9891	21.3509	20.697	22.794	23.1226	23.0497	22.7991
4.16774	1.56009	AT5G54770.1 | Symbols: THI1, TZ, THI4 | thiazole biosynthetic enzyme, chloroplast (ARA6) (THI1) (THI4) | chr5:22246634-22247891 FORWARD LENGTH=349	AT5G54770.1	AT5G54770.1		14	14	14	49	49	49	36.664	0	323.31	9273200000	308	24.4151	24.6902	24.6015	25.0305	26.4718	26.2831	26.2142	26.0087
1.52934	1.56005	AT1G21680.1 | Symbols: | DPP6 N-terminal domain-like protein | chr1:7613028-7615148 FORWARD LENGTH=706	AT1G21680.1;AT1G21670.1	AT1G21680.1		15	15	15	34.3	34.3	34.3	78.441	0	64.596	363360000	62	20.7471	22.6222	21.0843	22.8905	23.6367	23.1128	23.4024	23.4324
1.3917	1.55641	AT5G17530.1 | Symbols: | phosphoglucosamine mutase family protein | chr5:5778168-5781863 FORWARD LENGTH=581;AT5G17530.2 | Symbols: | phosphoglucosamine mutase family protein | chr5:5778168-5781863 FORWARD LENGTH=581;AT5G17530.3 | Symbols: | phosphogluco	AT5G17530.1;AT5G17530.2;AT5G17530.3	AT5G17530.1;AT5G17530.2;AT5G17530.3		17	17	17	53.7	53.7	53.7	62.875	0	293.49	1289300000	130	23.3318	22.8441	21.0944	23.4565	23.681	24.079	24.8551	24.3374
3.00433	1.55592	AT2G26080.1 | Symbols: AtGLDP2, GLDP2 | glycine decarboxylase P-protein 2 | chr2:11109330-11113786 REVERSE LENGTH=1044	AT2G26080.1	AT2G26080.1		47	21	21	55.2	29.8	29.8	113.77	0	323.31	3315500000	195	20.8914	20.8022	20.8863	20.8375	22.7626	22.0367	21.8984	22.9432
1.08717	1.55573	AT1G31160.1 | Symbols: HINT 2 | HISTIDINE TRIAD NUCLEOTIDE-BINDING 2 | chr1:11122880-11124106 REVERSE LENGTH=187	AT1G31160.1	AT1G31160.1		6	6	6	46.5	46.5	46.5	20.4	0	31.089	633860000	53	20.747	20.9342	21.0781	21.1941	23.454	22.4566	20.4934	23.7723
4.04328	1.5542	AT4G13360.1 | Symbols: | ATP-dependent caseinolytic (Clp) protease/crotonase family protein | chr4:7775133-7777701 FORWARD LENGTH=421	AT4G13360.1	AT4G13360.1		21	21	20	62.7	62.7	60.6	46.25	0	210.07	3003000000	243	23.8948	23.9117	23.3508	23.4974	25.439	24.9954	25.2326	25.2045
3.88605	1.55174	AT5G43940.1 | Symbols: HOT5, ADH2, GSNOR, ATGSNOR1, PAR2 | GroES-like zinc-binding dehydrogenase family protein | chr5:17684265-17686379 FORWARD LENGTH=379;AT5G43940.2 | Symbols: HOT5 | GroES-like zinc-binding dehydrogenase family protein | chr5:17684265-1	AT5G43940.1;AT5G43940.2	AT5G43940.1;AT5G43940.2		30	30	30	77.6	77.6	77.6	40.698	0	323.31	19376000000	555	25.7928	26.0766	25.7564	25.3859	27.5524	27.3571	27.0237	27.2855
4.77349	1.54757	AT1G01050.1 | Symbols: AtPPa1, PPa1 | pyrophosphorylase 1 | chr1:31382-32670 REVERSE LENGTH=212	AT1G01050.1	AT1G01050.1		10	8	5	48.1	42.9	23.6	24.484	0	129.62	4618200000	126	25.6877	25.7795	25.481	25.4349	26.9528	27.329	27.2782	27.0133
1.90357	1.54735	AT5G49555.1 | Symbols: | FAD/NAD(P)-binding oxidoreductase family protein | chr5:20107411-20110602 REVERSE LENGTH=556	AT5G49555.1	AT5G49555.1		30	30	30	61.9	61.9	61.9	60.489	0	323.31	3314300000	218	20.542	20.6186	20.9341	21.402	21.3161	22.4572	22.7793	23.1335
1.91035	1.54109	AT1G62810.1 | Symbols: | Copper amine oxidase family protein | chr1:23258253-23261772 REVERSE LENGTH=712	AT1G62810.1	AT1G62810.1		12	12	10	30.1	30.1	26.8	80.137	0	54.352	336480000	59	20.8874	22.2557	22.3633	20.8545	23.4541	23.233	22.9311	22.9071
1.16631	1.54007	AT4G32470.1 | Symbols: | Cytochrome bd ubiquinol oxidase, 14kDa subunit | chr4:15669641-15671095 REVERSE LENGTH=122;AT4G32470.2 | Symbols: | Cytochrome bd ubiquinol oxidase, 14kDa subunit | chr4:15669705-15671095 REVERSE LENGTH=101	AT4G32470.1;AT4G32470.2	AT4G32470.1;AT4G32470.2		22	22	21	78.7	78.7	78.7	14.527	0	323.31	13425000000	364	20.9427	20.6004	21.3228	20.8104	20.5327	22.5143	23.5224	23.2671
1.64859	1.53721	AT2G35490.1 | Symbols: | Plastid-lipid associated protein PAP / fibrillin family protein | chr2:14912309-14913797 REVERSE LENGTH=376	AT2G35490.1	AT2G35490.1		8	8	8	35.9	35.9	35.9	40.505	0	119.3	557720000	67	20.6931	20.9558	20.7783	20.8699	20.8688	23.0119	22.7891	22.7761
1.79405	1.53354	AT2G31725.1 | Symbols: | Eukaryotic protein of unknown function (DUF842) | chr2:13486447-13487391 REVERSE LENGTH=149	AT2G31725.1	AT2G31725.1		10	10	9	89.3	89.3	83.9	17.488	0	247.69	2650400000	154	21.2024	20.8022	20.8399	21.3768	23.3265	21.3104	22.9089	22.8097
4.97426	1.52665	AT5G27380.1 | Symbols: GSH2, GSHB | glutathione synthetase 2 | chr5:9668211-9670912 REVERSE LENGTH=539	AT5G27380.1	AT5G27380.1		38	38	38	82.2	82.2	82.2	60.27	0	323.31	7209200000	353	24.898	25.0254	24.8833	24.6166	26.5961	26.2543	26.316	26.3636
2.1908	1.52175	AT4G13720.1 | Symbols: | Inosine triphosphate pyrophosphatase family protein | chr4:7967166-7968894 REVERSE LENGTH=206	AT4G13720.1	AT4G13720.1		5	5	5	41.7	41.7	41.7	22.478	0	12.849	269580000	25	21.9974	22.1657	21.1789	20.6779	23.2908	23.1213	23.0062	22.6885
4.69135	1.5184	AT2G22240.1 | Symbols: ATMIPS2, MIPS2, ATIPS2 | myo-inositol-1-phosphate synthase 2 | chr2:9451901-9453938 REVERSE LENGTH=510;AT2G22240.2 | Symbols: ATMIPS2, MIPS2, ATIPS2 | myo-inositol-1-phosphate synthase 2 | chr2:9451901-9453375 REVERSE LENGTH=380	AT2G22240.1;AT2G22240.2	AT2G22240.1;AT2G22240.2		30	30	15	66.1	66.1	38	56.337	0	323.31	9351100000	380	25.5674	25.7417	25.3437	25.1916	26.959	26.9575	26.9168	27.0846
3.2954	1.51601	AT4G39200.2 | Symbols: | Ribosomal protein S25 family protein | chr4:18257464-18258464 FORWARD LENGTH=107;AT4G39200.1 | Symbols: | Ribosomal protein S25 family protein | chr4:18257464-18258464 FORWARD LENGTH=108	AT4G39200.2;AT4G39200.1	AT4G39200.2;AT4G39200.1		11	6	4	55.1	35.5	35.5	11.925	0	307.49	3094500000	99	24.7098	24.0144	24.3791	24.7402	25.8085	26.1862	26.2583	25.6544
5.40519	1.51313	AT2G44060.2 | Symbols: | Late embryogenesis abundant protein, group 2 | chr2:18226922-18227988 FORWARD LENGTH=325;AT2G44060.1 | Symbols: | Late embryogenesis abundant protein, group 2 | chr2:18226922-18227988 FORWARD LENGTH=325	AT2G44060.2;AT2G44060.1	AT2G44060.2;AT2G44060.1		36	36	36	86.8	86.8	86.8	36.036	0	323.31	19653000000	582	26.0986	26.1026	25.8474	25.7633	27.3748	27.4933	27.5568	27.4396
1.10864	1.51104	AT1G76860.1 | Symbols: | Small nuclear ribonucleoprotein family protein | chr1:28854594-28855637 REVERSE LENGTH=98	AT1G76860.1	AT1G76860.1		6	6	4	73.5	73.5	61.2	11.286	0	166.74	589920000	56	24.0591	23.4952	20.8555	23.2956	24.5442	24.4582	24.2667	24.4805
3.84226	1.50772	AT4G25100.5 | Symbols: FSD1 | Fe superoxide dismutase 1 | chr4:12884649-12886501 REVERSE LENGTH=212;AT4G25100.3 | Symbols: FSD1 | Fe superoxide dismutase 1 | chr4:12884649-12886501 REVERSE LENGTH=212;AT4G25100.2 | Symbols: FSD1 | Fe superoxide dismutase 1	AT4G25100.5;AT4G25100.3;AT4G25100.2;AT4G25100.1;AT4G25100.4	AT4G25100.5;AT4G25100.3;AT4G25100.2;AT4G25100.1;AT4G25100.4		9	9	9	53.8	53.8	53.8	23.791	0	323.31	9030600000	165	26.8844	27.1558	26.8606	26.7641	28.0948	28.2949	28.8287	28.4773
4.41519	1.50577	AT1G77120.1 | Symbols: ADH1, ADH, ATADH, ATADH1 | alcohol dehydrogenase 1 | chr1:28975509-28977216 FORWARD LENGTH=379	AT1G77120.1	AT1G77120.1		43	43	43	79.7	79.7	79.7	41.178	0	323.31	93192000000	893	28.4702	28.9835	28.8946	28.7219	30.1055	30.2991	30.1968	30.4919
3.69686	1.49767	AT5G35360.1 | Symbols: CAC2 | acetyl Co-enzyme a carboxylase biotin carboxylase subunit | chr5:13584300-13588268 FORWARD LENGTH=537;AT5G35360.3 | Symbols: CAC2 | acetyl Co-enzyme a carboxylase biotin carboxylase subunit | chr5:13584300-13588163 FORWARD LEN	AT5G35360.1;AT5G35360.3;AT5G35360.2	AT5G35360.1;AT5G35360.3;AT5G35360.2		30	30	30	66.1	66.1	66.1	58.386	0	323.31	5248000000	374	23.4871	23.6703	23.2928	24.0688	25.3541	24.9834	25.1723	25
2.05636	1.49669	AT4G22720.2 | Symbols: | Actin-like ATPase superfamily protein | chr4:11937467-11938717 FORWARD LENGTH=353;AT4G22720.1 | Symbols: | Actin-like ATPase superfamily protein | chr4:11937467-11938717 FORWARD LENGTH=353	AT4G22720.2;AT4G22720.1	AT4G22720.2;AT4G22720.1		12	12	12	51.3	51.3	51.3	38.767	0	70.436	417060000	55	22.3779	22.6612	21.0951	21.2897	23.455	23.3635	23.3542	23.238
1.06278	1.49643	AT2G33590.1 | Symbols: | NAD(P)-binding Rossmann-fold superfamily protein | chr2:14224622-14226365 FORWARD LENGTH=321	AT2G33590.1	AT2G33590.1		18	18	11	56.1	56.1	38	35.875	0	156.54	1027300000	114	23.4294	23.9549	20.8783	23.8972	24.6196	24.4757	24.5599	24.4903
1.83272	1.49034	AT5G60600.1 | Symbols: GCPE, ISPG, CSB3, CLB4, HDS | 4-hydroxy-3-methylbut-2-enyl diphosphate synthase | chr5:24359447-24363274 FORWARD LENGTH=741;AT5G60600.2 | Symbols: GCPE, ISPG, CSB3, CLB4, HDS | 4-hydroxy-3-methylbut-2-enyl diphosphate synthase | chr5	AT5G60600.1;AT5G60600.2;AT5G60600.3	AT5G60600.1;AT5G60600.2;AT5G60600.3		22	22	22	42.1	42.1	42.1	82.256	0	250.44	1301100000	150	21.2928	20.974	21.0378	22.6462	22.467	23.0143	22.9923	23.4385
5.27776	1.49028	AT3G58600.1 | Symbols: | Adaptin ear-binding coat-associated protein 1 NECAP-1 | chr3:21668746-21670999 REVERSE LENGTH=302	AT3G58600.1	AT3G58600.1		4	4	4	28.1	28.1	28.1	33.917	0	13.369	114950000	25	21.1179	20.7193	20.8532	20.8802	22.4075	22.2486	22.5064	22.3691
4.7559	1.48531	AT2G21620.1 | Symbols: RD2 | Adenine nucleotide alpha hydrolases-like superfamily protein | chr2:9248749-9249986 FORWARD LENGTH=187;AT2G21620.2 | Symbols: RD2 | Adenine nucleotide alpha hydrolases-like superfamily protein | chr2:9248749-9249986 FORWARD LEN	AT2G21620.1;AT2G21620.2	AT2G21620.1;AT2G21620.2		21	21	21	90.9	90.9	90.9	20.587	0	323.31	4816700000	225	24.912	24.7557	24.5495	24.395	26.0758	26.2165	26.2003	26.0607
1.39937	1.48047	AT4G29260.1 | Symbols: | HAD superfamily, subfamily IIIB acid phosphatase | chr4:14422310-14423409 REVERSE LENGTH=255	AT4G29260.1	AT4G29260.1		7	7	7	33.3	33.3	33.3	28.906	0	43.431	194190000	39	20.6039	20.8918	20.9604	23.0374	23.0937	22.7188	22.835	22.7679
6.14028	1.47954	AT2G24200.2 | Symbols: | Cytosol aminopeptidase family protein | chr2:10287017-10289450 REVERSE LENGTH=520;AT2G24200.1 | Symbols: | Cytosol aminopeptidase family protein | chr2:10287017-10289450 REVERSE LENGTH=520	AT2G24200.2;AT2G24200.1	AT2G24200.2;AT2G24200.1		40	40	5	86.9	86.9	10	54.509	0	323.31	17535000000	586	25.7614	26.012	25.8601	25.8255	27.4586	27.288	27.3734	27.2571
4.10335	1.47628	AT2G21170.1 | Symbols: TIM, PDTPI | triosephosphate isomerase | chr2:9071047-9073106 REVERSE LENGTH=315;AT2G21170.2 | Symbols: TIM, PDTPI | triosephosphate isomerase | chr2:9071047-9073106 REVERSE LENGTH=306	AT2G21170.1;AT2G21170.2	AT2G21170.1;AT2G21170.2		23	22	22	69.8	67.3	67.3	33.345	0	323.31	16510000000	420	25.9602	26.1602	26.1563	26.4302	27.984	27.395	27.5951	27.638
4.53649	1.4731	AT4G13930.1 | Symbols: SHM4 | serine hydroxymethyltransferase 4 | chr4:8048013-8050021 REVERSE LENGTH=471	AT4G13930.1;AT4G13890.1	AT4G13930.1		41	41	41	86.6	86.6	86.6	51.717	0	323.31	33125000000	638	26.4554	26.8838	26.5397	26.278	28.0613	28.0641	27.9792	27.9447
2.19658	1.47301	AT1G78150.1 | Symbols: | unknown protein;BEST Arabidopsis thaliana protein match is: unknown protein (TAIR:AT1G35780.1);Has 152 Blast hits to 146 proteins in 18 species: Archae - 0;Bacteria - 0;Metazoa - 1;Fungi - 2;Plants - 149;Viruses - 0;Other	AT1G78150.1;AT1G78150.2;AT1G78150.3	AT1G78150.1;AT1G78150.2;AT1G78150.3		25	25	24	76.3	76.3	72.6	29.679	0	323.31	6641600000	284	24.2834	24.2439	25.1861	25.1513	26.6404	26.2781	26.35	25.4883
7.21157	1.46639	AT4G30920.1 | Symbols: | Cytosol aminopeptidase family protein | chr4:15046589-15049304 REVERSE LENGTH=583	AT4G30920.1	AT4G30920.1		35	28	21	75.1	64	48.5	61.306	0	323.31	5111300000	324	23.605	23.6277	23.5354	23.6975	25.0037	25.0644	25.1178	25.1453
2.69334	1.45503	AT1G36310.2 | Symbols: | S-adenosyl-L-methionine-dependent methyltransferases superfamily protein | chr1:13669644-13670934 FORWARD LENGTH=404;AT1G36310.1 | Symbols: | S-adenosyl-L-methionine-dependent methyltransferases superfamily protein | chr1:1366964	AT1G36310.2;AT1G36310.1	AT1G36310.2;AT1G36310.1		21	21	21	72.5	72.5	72.5	44.959	0	203.2	1143200000	127	23.0038	21.9881	22.1874	22.9695	24.0377	24.2351	23.9209	23.7753
2.60434	1.44857	AT5G63980.1 | Symbols: SAL1, ALX8, ATSAL1, HOS2, FRY1, RON1 | Inositol monophosphatase family protein | chr5:25609840-25611802 FORWARD LENGTH=407	AT5G63980.1	AT5G63980.1		19	19	19	61.9	61.9	61.9	43.509	0	271.85	2510600000	209	24.4922	24.4275	24.2377	23.3928	25.8678	25.2319	25.7468	25.498
1.10845	1.44667	AT5G63310.1 | Symbols: NDPK2, NDPK1A, NDPK IA IA, NDPK IA, ATNDPK2 | nucleoside diphosphate kinase 2 | chr5:25372122-25373838 REVERSE LENGTH=231	AT5G63310.1	AT5G63310.1		10	10	10	32	32	32	25.55	0	38.219	295180000	44	20.7359	20.8479	21.1067	20.8144	20.3255	22.6499	23.154	23.1622
3.94428	1.44271	AT5G20070.1 | Symbols: ATNUDT19, ATNUDX19, NUDX19 | nudix hydrolase homolog 19 | chr5:6779893-6782308 FORWARD LENGTH=438	AT5G20070.1	AT5G20070.1		20	20	20	52.5	52.5	52.5	48.347	0	297.17	2821900000	177	23.9084	24.1081	23.6501	23.5586	25.4646	25.3597	24.9917	25.18
3.17402	1.44176	AT3G07470.1 | Symbols: | Protein of unknown function, DUF538 | chr3:2387291-2388343 REVERSE LENGTH=169	AT3G07470.1	AT3G07470.1		6	6	5	28.4	28.4	28.4	18.779	0	33.261	221320000	38	20.7536	20.7514	21.164	20.9417	21.782	22.7336	22.4855	22.3767
3.83586	1.43675	AT1G78380.1 | Symbols: ATGSTU19, GST8, GSTU19 | glutathione S-transferase TAU 19 | chr1:29486659-29487819 REVERSE LENGTH=219	AT1G78380.1;AT1G78320.1	AT1G78380.1		23	23	22	64.4	64.4	64.4	25.65	0	272.34	15738000000	385	26.931	27.2601	26.6768	26.6653	28.5528	28.341	28.299	28.0875
4.72501	1.43626	AT2G37020.1 | Symbols: | Translin family protein | chr2:15546514-15548792 FORWARD LENGTH=308;AT2G37020.2 | Symbols: | Translin family protein | chr2:15546511-15548792 FORWARD LENGTH=310	AT2G37020.1;AT2G37020.2	AT2G37020.1;AT2G37020.2		10	10	10	43.5	43.5	43.5	35.053	0	41.134	275900000	61	20.8672	21.1503	21.2583	21.2356	22.4299	22.7611	22.6091	22.4564
4.01639	1.43201	AT1G23190.1 | Symbols: PGM3 | Phosphoglucomutase/phosphomannomutase family protein | chr1:8219946-8224186 FORWARD LENGTH=583	AT1G23190.1	AT1G23190.1		43	28	28	79.8	52.5	52.5	63.17	0	218.73	2237200000	201	23.7816	23.8412	23.6067	23.2495	25.2759	25.0469	25.0035	24.8807
6.32339	1.4318	AT4G35830.1 | Symbols: ACO1 | aconitase 1 | chr4:16973007-16977949 REVERSE LENGTH=898;AT4G35830.2 | Symbols: ACO1 | aconitase 1 | chr4:16973007-16977278 REVERSE LENGTH=795	AT4G35830.1;AT4G35830.2	AT4G35830.1;AT4G35830.2		70	60	60	77.6	68.9	68.9	98.151	0	323.31	22984000000	853	26.2736	26.3565	26.1285	26.1688	27.7432	27.7038	27.5864	27.6213
1.701	1.42922	AT2G24390.3 | Symbols: | AIG2-like (avirulence induced gene) family protein | chr2:10373796-10374654 FORWARD LENGTH=148;AT2G24390.1 | Symbols: | AIG2-like (avirulence induced gene) family protein | chr2:10373796-10374654 FORWARD LENGTH=152;AT2G24390.2 |	AT2G24390.3;AT2G24390.1;AT2G24390.2	AT2G24390.3;AT2G24390.1;AT2G24390.2		7	7	7	63.5	63.5	63.5	17.057	0	71.346	374850000	43	22.9148	22.2775	21.3209	20.991	23.0379	23.2755	23.572	23.3357
1.14468	1.42444	AT1G54220.2 | Symbols: | Dihydrolipoamide acetyltransferase, long form protein | chr1:20246460-20250208 REVERSE LENGTH=539;AT1G54220.1 | Symbols: | Dihydrolipoamide acetyltransferase, long form protein | chr1:20246460-20250208 REVERSE LENGTH=539	AT1G54220.2;AT1G54220.1	AT1G54220.2;AT1G54220.1		28	20	20	56.6	46.9	46.9	58.467	0	192.68	3149000000	174	20.8303	21.0573	21.1768	20.8231	23.4908	22.1764	20.6581	23.2598
3.63957	1.4191	AT1G19570.1 | Symbols: DHAR1, ATDHAR1, DHAR5 | dehydroascorbate reductase | chr1:6773462-6774413 REVERSE LENGTH=213;AT1G19570.2 | Symbols: DHAR1, ATDHAR1, DHAR5 | dehydroascorbate reductase | chr1:6773462-6774413 REVERSE LENGTH=212	AT1G19570.1;AT1G19570.2;AT1G19550.1	AT1G19570.1;AT1G19570.2		19	19	19	94.8	94.8	94.8	23.641	0	246.19	5342700000	229	24.8543	24.6891	24.6128	24.1635	26.3138	25.8878	25.8832	25.9113
3.66866	1.41387	AT4G09670.1 | Symbols: | Oxidoreductase family protein | chr4:6107382-6109049 REVERSE LENGTH=362	AT4G09670.1	AT4G09670.1		20	20	20	61.6	61.6	61.6	39.562	0	181.54	2188800000	156	23.667	23.9305	23.2205	23.2421	24.9857	24.9792	24.793	24.9576
1.6756	1.41048	AT2G26060.1 | Symbols: emb1345 | Transducin/WD40 repeat-like superfamily protein | chr2:11102400-11105127 FORWARD LENGTH=352;AT2G26060.2 | Symbols: emb1345 | Transducin/WD40 repeat-like superfamily protein | chr2:11102400-11105081 FORWARD LENGTH=337	AT2G26060.1;AT2G26060.2	AT2G26060.1;AT2G26060.2		12	12	12	59.7	59.7	59.7	39.131	0	67.543	248200000	42	22.7526	20.9291	21.0535	20.9855	23.0438	22.8117	22.9622	22.5451
2.90757	1.40952	AT3G22110.1 | Symbols: PAC1 | 20S proteasome alpha subunit C1 | chr3:7792819-7793571 REVERSE LENGTH=250	AT3G22110.1	AT3G22110.1		21	21	18	76.4	76.4	72.8	27.475	0	319.23	5472600000	214	25.7381	25.7589	25.3038	24.8323	26.5062	27.049	26.8446	26.8715
1.38197	1.4092	AT5G17710.1 | Symbols: EMB1241 | Co-chaperone GrpE family protein | chr5:5839560-5841639 REVERSE LENGTH=324;AT5G17710.2 | Symbols: EMB1241 | Co-chaperone GrpE family protein | chr5:5839560-5841639 REVERSE LENGTH=326	AT5G17710.1;AT5G17710.2	AT5G17710.1;AT5G17710.2		14	14	14	51.5	51.5	51.5	35.493	0	174.67	2757000000	162	22.9864	23.0074	21.0174	23.4584	24.0781	24.056	23.9395	24.0329
6.30364	1.39944	AT5G58240.2 | Symbols: FHIT | FRAGILE HISTIDINE TRIAD | chr5:23558349-23559171 REVERSE LENGTH=160;AT5G58240.1 | Symbols: FHIT | FRAGILE HISTIDINE TRIAD | chr5:23558349-23559313 REVERSE LENGTH=180	AT5G58240.2;AT5G58240.1	AT5G58240.2;AT5G58240.1		7	7	7	60.6	60.6	60.6	18.128	0	234.13	1462800000	108	23.4733	23.3753	23.372	23.4765	24.9112	24.7003	24.763	24.9204
4.33832	1.39942	AT4G16155.1 | Symbols: | dihydrolipoyl dehydrogenases | chr4:9153570-9157322 REVERSE LENGTH=630	AT4G16155.1	AT4G16155.1		27	27	14	57	57	33.8	67.089	0	323.31	9939200000	497	24.0234	24.2967	24.0046	24.1847	25.4072	25.2799	25.8007	25.6192
5.39009	1.39571	AT1G02880.3 | Symbols: TPK1 | thiamin pyrophosphokinase1 | chr1:643063-644485 REVERSE LENGTH=267;AT1G02880.2 | Symbols: TPK1 | thiamin pyrophosphokinase1 | chr1:643063-644476 REVERSE LENGTH=264;AT1G02880.4 | Symbols: TPK1 | thiamin pyrophosphokinase1 | chr	AT1G02880.3;AT1G02880.2;AT1G02880.4;AT1G02880.1	AT1G02880.3;AT1G02880.2;AT1G02880.4;AT1G02880.1		9	9	6	54.3	54.3	40.1	29.879	0	95.014	192810000	39	20.9469	20.7257	21.0478	20.9161	22.1975	22.2636	22.2924	22.4657
1.42669	1.3928	AT1G47260.1 | Symbols: APFI, GAMMA CA2 | gamma carbonic anhydrase 2 | chr1:17321384-17323347 REVERSE LENGTH=278	AT1G47260.1	AT1G47260.1		23	19	19	92.1	86	86	30.065	0	323.31	18244000000	383	21.0929	20.911	19.4194	20.8913	20.9867	22.0556	22.2134	22.6301
1.91159	1.3911	AT3G54110.1 | Symbols: ATPUMP1, UCP, PUMP1, ATUCP1, UCP1 | plant uncoupling mitochondrial protein 1 | chr3:20038890-20040996 FORWARD LENGTH=306	AT3G54110.1	AT3G54110.1		40	40	40	79.7	79.7	79.7	32.662	0	323.31	25234000000	476	20.9562	21.0872	20.9501	21.043	21.7513	21.7628	22.7371	23.3496
3.6367	1.39098	AT2G20760.1 | Symbols: | Clathrin light chain protein | chr2:8943279-8945108 REVERSE LENGTH=338	AT2G20760.1	AT2G20760.1		13	13	12	23.4	23.4	21	37.225	0	48.141	3312000000	130	25.447	25.1684	25.2734	25.3142	26.9334	26.1975	26.8696	26.7664
2.58518	1.39008	AT1G08360.1 | Symbols: | Ribosomal protein L1p/L10e family | chr1:2636231-2637694 FORWARD LENGTH=216	AT1G08360.1	AT1G08360.1		20	20	8	59.3	59.3	22.2	24.469	0	140	5407400000	218	24.7211	25.8324	25.1949	25.7064	27.1071	26.6648	26.6623	26.581
2.47171	1.38939	AT4G02610.1 | Symbols: | Aldolase-type TIM barrel family protein | chr4:1147662-1149217 FORWARD LENGTH=275	AT4G02610.1	AT4G02610.1		16	16	16	71.3	71.3	71.3	29.579	0	285.54	1099200000	115	23.699	23.3898	22.3813	23.11	24.7648	24.5364	24.3097	24.5267
5.06433	1.38504	AT3G03520.1 | Symbols: NPC3 | non-specific phospholipase C3 | chr3:837972-840511 REVERSE LENGTH=523	AT3G03520.1;AT3G03540.1;AT3G03530.1	AT3G03520.1		14	14	14	49.9	49.9	49.9	59.097	0	79.249	268290000	54	20.9584	20.757	21.0616	21.1825	22.4564	22.2617	22.4196	22.362
4.92521	1.382	AT4G20430.2 | Symbols: | Subtilase family protein | chr4:11017656-11021105 REVERSE LENGTH=832;AT4G20430.1 | Symbols: | Subtilase family protein | chr4:11017656-11021105 REVERSE LENGTH=856	AT4G20430.2;AT4G20430.1;AT5G44530.1	AT4G20430.2;AT4G20430.1		7	7	7	11.9	11.9	11.9	89.119	0	46.736	260370000	67	20.9427	20.6618	20.946	21.0834	22.2437	22.1589	22.3414	22.4178
1.8917	1.38181	AT3G10850.1 | Symbols: GLX2-2, GLY2 | Metallo-hydrolase/oxidoreductase superfamily protein | chr3:3397756-3399522 REVERSE LENGTH=258	AT3G10850.1	AT3G10850.1		13	13	13	81.8	81.8	81.8	28.791	0	270.32	2784900000	162	24.6927	24.6811	24.4622	23.2877	25.8546	25.9519	25.0443	25.8002
1.55599	1.37253	AT5G05340.1 | Symbols: | Peroxidase superfamily protein | chr5:1579142-1580819 REVERSE LENGTH=324	AT5G05340.1	AT5G05340.1		8	8	8	47.5	47.5	47.5	34.215	0	42.154	275160000	41	22.6687	20.6179	21.261	21.1385	22.7259	23.3309	22.5931	22.5263
1.07117	1.3709	AT4G22240.1 | Symbols: | Plastid-lipid associated protein PAP / fibrillin family protein | chr4:11766090-11767227 REVERSE LENGTH=310	AT4G22240.1	AT4G22240.1		12	12	11	55.8	55.8	51	33.655	0	146.46	874490000	103	20.7424	20.8018	21.1469	20.9699	22.4761	20.3749	23.2828	23.0109
5.76778	1.36271	AT4G29120.1 | Symbols: | 6-phosphogluconate dehydrogenase family protein | chr4:14350861-14351865 FORWARD LENGTH=334	AT4G29120.1	AT4G29120.1		17	17	17	69.8	69.8	69.8	35.371	0	270	2479700000	208	23.4265	23.6239	23.4206	23.2874	24.8602	24.8056	24.8138	24.7296
3.74013	1.36257	AT2G22230.1 | Symbols: | Thioesterase superfamily protein | chr2:9450042-9451427 FORWARD LENGTH=220	AT2G22230.1	AT2G22230.1		7	7	5	25.5	25.5	19.1	24.242	0	64.956	1544400000	121	24.066	23.7379	24.0256	23.5177	25.0736	25.4876	25.0119	25.2243
3.0852	1.36147	AT5G11670.1 | Symbols: ATNADP-ME2, NADP-ME2 | NADP-malic enzyme 2 | chr5:3754456-3758040 FORWARD LENGTH=588	AT5G11670.1;AT5G25880.1	AT5G11670.1		61	61	56	97.8	97.8	97.6	64.412	0	323.31	87475000000	1280	28.0064	28.0567	27.5051	27.2197	29.2526	29.1418	28.8546	28.9848
4.41493	1.36113	AT1G55490.2 | Symbols: CPN60B, LEN1 | chaperonin 60 beta | chr1:20715717-20718673 REVERSE LENGTH=600;AT1G55490.1 | Symbols: CPN60B, LEN1 | chaperonin 60 beta | chr1:20715717-20718673 REVERSE LENGTH=600	AT1G55490.2;AT1G55490.1;AT1G26230.2;AT1G26230.1	AT1G55490.2;AT1G55490.1		59	59	19	73.7	73.7	37.7	63.808	0	323.31	41542000000	1281	25.3514	25.6094	25.2734	25.6846	27.0422	26.8121	26.6581	26.8509
2.48554	1.36079	AT2G34260.2 | Symbols: | transducin family protein / WD-40 repeat family protein | chr2:14466337-14468416 FORWARD LENGTH=296;AT2G34260.1 | Symbols: | transducin family protein / WD-40 repeat family protein | chr2:14465899-14468416 FORWARD LENGTH=353	AT2G34260.2;AT2G34260.1	AT2G34260.2;AT2G34260.1		5	5	5	33.1	33.1	33.1	32.086	0	52.542	243600000	40	21.9733	21.8824	20.9576	21.0724	22.8598	23.0534	22.5154	22.9003
2.57162	1.35677	AT2G21580.2 | Symbols: | Ribosomal protein S25 family protein | chr2:9236629-9237510 FORWARD LENGTH=107;AT2G21580.1 | Symbols: | Ribosomal protein S25 family protein | chr2:9236629-9237510 FORWARD LENGTH=108	AT2G21580.2;AT2G21580.1	AT2G21580.2;AT2G21580.1		11	11	5	55.1	55.1	23.4	11.941	0	323.31	13792000000	259	26.3395	25.5659	26.3769	26.8231	27.4918	27.7217	27.8452	27.4737
2.98955	1.3545	AT4G17830.1 | Symbols: | Peptidase M20/M25/M40 family protein | chr4:9915916-9918049 FORWARD LENGTH=440;AT4G17830.2 | Symbols: | Peptidase M20/M25/M40 family protein | chr4:9915916-9918049 FORWARD LENGTH=445	AT4G17830.1;AT4G17830.2	AT4G17830.1;AT4G17830.2		23	23	23	78.2	78.2	78.2	48.217	0	323.31	3387100000	210	24.6715	24.9268	23.8875	24.4507	25.7844	25.8811	25.9726	25.7165
1.9225	1.35314	AT5G53120.5 | Symbols: SPDS3, SPMS | spermidine synthase 3 | chr5:21535429-21537653 FORWARD LENGTH=359;AT5G53120.4 | Symbols: SPDS3, SPMS | spermidine synthase 3 | chr5:21535429-21537653 FORWARD LENGTH=359;AT5G53120.3 | Symbols: SPDS3, SPMS | spermidine sy	AT5G53120.5;AT5G53120.4;AT5G53120.3;AT5G53120.2;AT5G53120.1;AT5G53120.6	AT5G53120.5;AT5G53120.4;AT5G53120.3;AT5G53120.2;AT5G53120.1;AT5G53120.6		19	19	19	77.7	77.7	77.7	39.239	0	136.71	1033100000	101	23.0121	22.9444	21.5503	23.1954	23.9834	24.1	23.9608	24.0706
3.29117	1.35053	AT4G14800.1 | Symbols: PBD2 | 20S proteasome beta subunit D2 | chr4:8500398-8502058 FORWARD LENGTH=199;AT4G14800.2 | Symbols: PBD2 | 20S proteasome beta subunit D2 | chr4:8500398-8502058 FORWARD LENGTH=215	AT4G14800.1;AT4G14800.2	AT4G14800.1;AT4G14800.2		16	16	7	75.9	75.9	40.7	21.984	0	167.28	2685600000	137	24.3097	24.5143	23.9962	23.6639	25.6173	25.5474	25.2811	25.4404
3.85259	1.34991	AT5G42980.1 | Symbols: ATTRX3, ATH3, ATTRXH3, TRXH3, TRX3 | thioredoxin 3 | chr5:17242772-17243718 FORWARD LENGTH=118	AT5G42980.1	AT5G42980.1		17	17	17	87.3	87.3	87.3	13.109	0	323.31	42192000000	519	27.7525	27.8909	27.6564	27.1858	28.9775	29.0733	28.8852	28.9493
1.65016	1.34881	AT5G14800.1 | Symbols: P5CR, AT-P5R, AT-P5C1, EMB2772 | pyrroline-5- carboxylate (P5C) reductase | chr5:4786190-4787618 REVERSE LENGTH=276;AT5G14800.2 | Symbols: P5CR, AT-P5R, AT-P5C1, EMB2772 | pyrroline-5- carboxylate (P5C) reductase | chr5:4786353-47876	AT5G14800.1;AT5G14800.2	AT5G14800.1;AT5G14800.2		9	9	9	48.2	48.2	48.2	28.624	0	33.633	280890000	45	20.6755	22.532	21.2227	22.2481	23.2104	23.0316	22.8281	23.0034
2.21801	1.34681	AT1G15230.1 | Symbols: | unknown protein;FUNCTIONS IN: molecular_function unknown;INVOLVED IN: biological_process unknown;LOCATED IN: cellular_component unknown;EXPRESSED IN: 24 plant structures;EXPRESSED DURING: 15 growth stages;Has 26 Blast hits t	AT1G15230.1	AT1G15230.1		10	10	10	81.9	81.9	81.9	16.467	0	197.65	1627100000	108	24.454	24.3362	23.9617	23.5761	26.0787	25.5328	24.8558	25.248
4.88528	1.34627	AT2G25060.1 | Symbols: ENODL14, AtENODL14 | early nodulin-like protein 14 | chr2:10662308-10662930 FORWARD LENGTH=182	AT2G25060.1	AT2G25060.1		7	7	7	36.3	36.3	36.3	19.482	0	46.725	1602300000	96	23.9747	23.8285	24.0958	23.8398	25.1225	25.2361	25.2524	25.513
5.13292	1.34419	AT5G17330.1 | Symbols: GAD, GAD1 | glutamate decarboxylase | chr5:5711141-5714839 FORWARD LENGTH=502	AT5G17330.1;AT2G02010.1;AT2G02000.1;AT3G17760.2;AT3G17760.1;AT3G17720.1	AT5G17330.1		47	47	43	74.1	74.1	72.3	57.066	0	323.31	49524000000	875	27.2729	27.3265	27.0932	26.9493	28.5502	28.5276	28.3931	28.5477
3.10481	1.33821	AT1G35780.1 | Symbols: | unknown protein;BEST Arabidopsis thaliana protein match is: unknown protein (TAIR:AT1G78150.2);Has 145 Blast hits to 144 proteins in 16 species: Archae - 0;Bacteria - 0;Metazoa - 0;Fungi - 0;Plants - 145;Viruses - 0;Other	AT1G35780.1	AT1G35780.1		17	16	15	59.1	55.6	55.6	31.07	0	147.91	1037600000	120	23.3582	23.1645	22.5986	23.0592	24.8064	24.2144	24.2726	24.24
5.53331	1.33586	AT2G29560.1 | Symbols: ENOC | cytosolic enolase | chr2:12646635-12649694 FORWARD LENGTH=475	AT2G29560.1	AT2G29560.1		31	31	31	76.4	76.4	76.4	51.599	0	262.94	3089700000	226	23.8752	23.8702	23.7775	23.7173	25.3461	25.134	25.0276	25.0759
4.57923	1.3348	AT4G19880.1 | Symbols: | Glutathione S-transferase family protein | chr4:10784691-10786376 REVERSE LENGTH=356;AT4G19880.2 | Symbols: | Glutathione S-transferase family protein | chr4:10784691-10786376 REVERSE LENGTH=382;AT4G19880.3 | Symbols: | Glutathi	AT4G19880.1;AT4G19880.2;AT4G19880.3;AT5G44990.2;AT5G44990.1;AT5G44990.3	AT4G19880.1;AT4G19880.2;AT4G19880.3		24	24	20	81.7	81.7	77	40.575	0	320.07	2535700000	238	24.0109	24.0237	23.9985	24.4191	25.5056	25.3476	25.5763	25.362
3.52032	1.32896	AT3G02870.1 | Symbols: VTC4 | Inositol monophosphatase family protein | chr3:627742-629682 REVERSE LENGTH=271;AT3G02870.3 | Symbols: VTC4 | Inositol monophosphatase family protein | chr3:627742-629682 REVERSE LENGTH=268	AT3G02870.1;AT3G02870.3	AT3G02870.1;AT3G02870.3		19	19	5	57.6	57.6	8.9	29.121	0	323.31	22185000000	299	27.3239	27.5497	27.2518	26.9437	28.9655	28.4988	28.3852	28.5354
0.80004	1.32892	AT1G18210.2 | Symbols: | Calcium-binding EF-hand family protein | chr1:6268273-6268785 REVERSE LENGTH=170;AT1G18210.1 | Symbols: | Calcium-binding EF-hand family protein | chr1:6268273-6268785 REVERSE LENGTH=170	AT1G18210.2;AT1G18210.1	AT1G18210.2;AT1G18210.1		9	9	9	81.2	81.2	81.2	18.35	0	223.78	1326000000	98	23.6512	24.0037	21.24	21.2899	23.869	24.2845	22.8688	24.4782
4.42547	1.32803	AT4G13940.1 | Symbols: HOG1, EMB1395, SAHH1, MEE58, ATSAHH1 | S-adenosyl-L-homocysteine hydrolase | chr4:8054931-8056676 FORWARD LENGTH=485;AT4G13940.3 | Symbols: HOG1, SAHH1 | S-adenosyl-L-homocysteine hydrolase | chr4:8054931-8056676 FORWARD LENGTH=440;A	AT4G13940.1;AT4G13940.3;AT4G13940.2;AT4G13940.4	AT4G13940.1;AT4G13940.3;AT4G13940.2;AT4G13940.4		55	55	26	88.5	88.5	49.5	53.378	0	323.31	119280000000	1253	29.0584	29.2198	28.8766	28.9092	30.5594	30.4463	30.2009	30.1696
2.20391	1.32749	AT5G52310.1 | Symbols: COR78, LTI78, RD29A, LTI140 | low-temperature-responsive protein 78 (LTI78) / desiccation-responsive protein 29A (RD29A) | chr5:21240929-21243326 FORWARD LENGTH=710	AT5G52310.1	AT5G52310.1		11	11	11	32	32	32	77.855	0	40.673	220010000	40	21.1375	22.1578	20.9959	21.096	23.0816	22.2497	22.596	22.7699
5.18603	1.32568	AT3G51160.1 | Symbols: MUR1, MUR_1, GMD2 | NAD(P)-binding Rossmann-fold superfamily protein | chr3:19007232-19008353 REVERSE LENGTH=373	AT3G51160.1	AT3G51160.1		27	27	20	55	55	48.8	41.961	0	323.31	9406100000	315	25.5227	25.3981	25.3146	25.6189	26.9577	26.6761	26.7956	26.7275
3.11536	1.32467	AT5G28050.1 | Symbols: | Cytidine/deoxycytidylate deaminase family protein | chr5:10044209-10045755 REVERSE LENGTH=185;AT5G28050.2 | Symbols: | Cytidine/deoxycytidylate deaminase family protein | chr5:10044209-10045484 REVERSE LENGTH=204	AT5G28050.1;AT5G28050.2	AT5G28050.1;AT5G28050.2		12	12	12	78.9	78.9	78.9	20.001	0	200.84	2245300000	136	24.0767	24.2495	24.2565	23.7179	25.8952	25.1361	25.3254	25.2426
1.00888	1.32356	AT4G14430.1 | Symbols: IBR10, ATECI2, ECI2, ECHIB, PEC12 | indole-3-butyric acid response 10 | chr4:8304910-8305632 REVERSE LENGTH=240	AT4G14430.1	AT4G14430.1		14	14	14	36.7	36.7	36.7	25.773	0	206.87	883870000	83	21.2486	20.8989	21.0443	20.8876	20.3627	23.1518	22.6698	23.1893
3.25527	1.32275	AT5G20830.2 | Symbols: SUS1, ASUS1, atsus1 | sucrose synthase 1 | chr5:7050599-7054032 REVERSE LENGTH=808;AT5G20830.1 | Symbols: SUS1, ASUS1, atsus1 | sucrose synthase 1 | chr5:7050599-7054032 REVERSE LENGTH=808	AT5G20830.2;AT5G20830.1	AT5G20830.2;AT5G20830.1		72	72	60	73	73	68.4	92.996	0	323.31	57775000000	1254	27.0426	27.3757	27.1618	26.5526	28.2279	28.522	28.1577	28.516
4.87889	1.32198	AT3G53620.1 | Symbols: AtPPa4, PPa4 | pyrophosphorylase 4 | chr3:19881491-19883308 FORWARD LENGTH=216	AT3G53620.1	AT3G53620.1		15	15	12	78.2	78.2	67.1	24.576	0	190.56	2653900000	111	24.8063	25.0146	25.0089	25.1073	26.4378	26.2151	26.4455	26.1266
1.29763	1.3207	AT5G51970.2 | Symbols: | GroES-like zinc-binding alcohol dehydrogenase family protein | chr5:21111820-21113284 FORWARD LENGTH=364;AT5G51970.1 | Symbols: | GroES-like zinc-binding alcohol dehydrogenase family protein | chr5:21111820-21113284 FORWARD LENGT	AT5G51970.2;AT5G51970.1	AT5G51970.2;AT5G51970.1		19	19	19	72.8	72.8	72.8	39.255	0	291.07	987280000	101	22.9006	22.6691	20.9832	23.3294	23.5727	24.0521	23.4373	24.103
1.22316	1.31926	AT3G12390.1 | Symbols: | Nascent polypeptide-associated complex (NAC), alpha subunit family protein | chr3:3942344-3943595 FORWARD LENGTH=203	AT3G12390.1	AT3G12390.1		12	7	7	58.6	45.8	45.8	21.982	0	111.76	696560000	41	23.7425	23.6608	21.3949	23.4125	24.5036	24.5873	24.043	24.3539
1.84324	1.3178	AT2G03680.2 | Symbols: SPR1, SKU6 | spiral1 | chr2:1121398-1121850 FORWARD LENGTH=119;AT2G03680.1 | Symbols: SPR1, SKU6 | spiral1 | chr2:1121398-1121850 FORWARD LENGTH=119	AT2G03680.2;AT2G03680.1	AT2G03680.2;AT2G03680.1		8	8	8	99.2	99.2	99.2	11.92	0	288.42	11839000000	150	27.9129	27.4982	26.4074	26.6444	28.0035	28.5932	28.4252	28.7123
5.47422	1.31763	AT3G53970.1 | Symbols: | proteasome inhibitor-related | chr3:19985208-19987132 FORWARD LENGTH=302;AT3G53970.2 | Symbols: | proteasome inhibitor-related | chr3:19985208-19986762 FORWARD LENGTH=252	AT3G53970.1;AT3G53970.2	AT3G53970.1;AT3G53970.2		11	11	11	64.9	64.9	64.9	32.116	0	99.845	985670000	62	23.1946	23.0821	23.0722	22.9326	24.4757	24.3845	24.473	24.2188
4.90798	1.31142	AT5G27470.1 | Symbols: | seryl-tRNA synthetase / serine--tRNA ligase | chr5:9695087-9697154 FORWARD LENGTH=451	AT5G27470.1	AT5G27470.1		47	47	47	78.5	78.5	78.5	51.628	0	323.31	19312000000	648	26.2055	26.2455	26.0118	25.9766	27.6327	27.4056	27.3528	27.294
3.64103	1.30766	AT4G14880.4 | Symbols: OASA1 | O-acetylserine (thiol) lyase (OAS-TL) isoform A1 | chr4:8518209-8520050 REVERSE LENGTH=322;AT4G14880.3 | Symbols: OASA1 | O-acetylserine (thiol) lyase (OAS-TL) isoform A1 | chr4:8518209-8520050 REVERSE LENGTH=322;AT4G14880.2	AT4G14880.4;AT4G14880.3;AT4G14880.2;AT4G14880.1	AT4G14880.4;AT4G14880.3;AT4G14880.2;AT4G14880.1		27	27	22	78	78	72.7	33.805	0	323.31	23312000000	521	27.0475	27.0813	26.667	26.4668	28.3014	28.1808	27.9643	28.0467
2.81487	1.30622	AT3G58750.1 | Symbols: CSY2 | citrate synthase 2 | chr3:21724564-21727458 REVERSE LENGTH=514	AT3G58750.1	AT3G58750.1		25	25	16	54.3	54.3	41.8	56.602	0	323.31	13506000000	462	22.5429	23.1315	22.8185	23.479	23.9369	24.3629	24.373	24.524
4.50904	1.30292	AT4G31300.1 | Symbols: PBA1 | N-terminal nucleophile aminohydrolases (Ntn hydrolases) superfamily protein | chr4:15188927-15190935 FORWARD LENGTH=233;AT4G31300.3 | Symbols: PBA1 | N-terminal nucleophile aminohydrolases (Ntn hydrolases) superfamily protein	AT4G31300.1;AT4G31300.3;AT4G31300.2	AT4G31300.1;AT4G31300.3;AT4G31300.2		15	15	15	68.2	68.2	68.2	25.151	0	323.31	5127800000	177	24.9888	25.375	24.9654	24.9225	26.4233	26.4636	26.2302	26.3462
3.33812	1.30211	AT5G20060.3 | Symbols: | alpha/beta-Hydrolases superfamily protein | chr5:6776800-6779447 FORWARD LENGTH=252;AT5G20060.2 | Symbols: | alpha/beta-Hydrolases superfamily protein | chr5:6776800-6779447 FORWARD LENGTH=252;AT5G20060.1 | Symbols: | alpha/beta	AT5G20060.3;AT5G20060.2;AT5G20060.1	AT5G20060.3;AT5G20060.2;AT5G20060.1		16	16	16	75	75	75	26.727	0	323.31	4553100000	180	25.8655	25.4138	25.222	25.6258	27.1313	26.8695	26.8292	26.5054
3.10794	1.30155	AT4G32840.1 | Symbols: PFK6 | phosphofructokinase 6 | chr4:15845010-15848305 REVERSE LENGTH=462	AT4G32840.1	AT4G32840.1		20	19	16	57.6	55.6	48.7	50.787	0	180.84	1718600000	141	23.5975	24.0304	23.1531	23.8523	25.0767	25.0538	24.711	24.9981
3.99989	1.301	AT1G15000.1 | Symbols: scpl50 | serine carboxypeptidase-like 50 | chr1:5168613-5169947 FORWARD LENGTH=444	AT1G15000.1	AT1G15000.1		27	27	27	57.9	57.9	57.9	49.222	0	323.31	12451000000	284	27.5035	27.5879	27.4484	26.9707	28.6838	28.7772	28.611	28.6424
4.64632	1.29973	AT5G60160.1 | Symbols: | Zn-dependent exopeptidases superfamily protein | chr5:24223887-24226783 REVERSE LENGTH=477	AT5G60160.1	AT5G60160.1		32	32	32	89.7	89.7	89.7	52.425	0	323.31	6460300000	340	24.7777	24.8954	24.6543	24.726	26.3237	26.0951	25.8761	25.9574
0.932515	1.29874	AT1G02170.1 | Symbols: LOL3, ATMCPB1, MCP1B, ATMC1, MC1 | metacaspase 1 | chr1:411883-413426 FORWARD LENGTH=367	AT1G02170.1	AT1G02170.1		6	6	6	33	33	33	39.792	0	67.536	144490000	27	20.7384	20.9627	20.9463	21.0684	23.076	23.1506	20.1505	22.5336
3.93753	1.2977	AT5G11720.1 | Symbols: | Glycosyl hydrolases family 31 protein | chr5:3776840-3780025 FORWARD LENGTH=902	AT5G11720.1	AT5G11720.1		11	11	11	18.5	18.5	18.5	101.12	0	53.735	341410000	67	21.5167	21.3062	20.9921	21.5866	22.8072	22.5376	22.5724	22.6754
1.21252	1.29712	AT5G49980.1 | Symbols: AFB5 | auxin F-box protein 5 | chr5:20334420-20336531 REVERSE LENGTH=619	AT5G49980.1	AT5G49980.1		16	16	16	43.9	43.9	43.9	69.316	0	269.39	738690000	96	23.2264	22.9719	21.1619	22.8367	22.9258	24.0791	24.0454	24.335
2.12977	1.29349	AT5G50850.1 | Symbols: MAB1 | Transketolase family protein | chr5:20689671-20692976 FORWARD LENGTH=363	AT5G50850.1	AT5G50850.1		23	23	23	59.5	59.5	59.5	39.175	0	323.31	33027000000	516	22.2875	22.7351	23.2676	23.5687	24.0655	23.9677	24.3108	24.6889
2.52502	1.29302	AT4G36195.2 | Symbols: | Serine carboxypeptidase S28 family protein | chr4:17127202-17129787 FORWARD LENGTH=477;AT4G36195.3 | Symbols: | Serine carboxypeptidase S28 family protein | chr4:17127202-17129787 FORWARD LENGTH=488;AT4G36195.1 | Symbols: | Seri	AT4G36195.2;AT4G36195.3;AT4G36195.1;AT4G36190.1	AT4G36195.2;AT4G36195.3;AT4G36195.1		18	18	18	49.9	49.9	49.9	53.711	0	179.47	1335400000	110	23.1186	23.3378	23.2258	23.4704	25.0644	24.8578	23.8835	24.5189
5.06546	1.29207	AT1G60710.1 | Symbols: ATB2 | NAD(P)-linked oxidoreductase superfamily protein | chr1:22355073-22356627 REVERSE LENGTH=345	AT1G60710.1	AT1G60710.1		24	24	18	56.8	56.8	52.5	37.924	0	323.31	4125700000	210	24.5681	24.8414	24.8047	24.7699	26.2014	26.0901	25.9862	25.8747
3.03499	1.28985	AT1G19130.1 | Symbols: | CONTAINS InterPro DOMAIN/s: Protein of unknown function DUF985 (InterPro:IPR009327), RmlC-like jelly roll fold (InterPro:IPR014710);Has 1465 Blast hits to 1465 proteins in 584 species: Archae - 10;Bacteria - 1038;Metazoa - 19;	AT1G19130.1	AT1G19130.1		13	13	13	89.1	89.1	89.1	21.64	0	231.84	1884800000	105	24.2804	24.3206	23.6499	23.8088	24.9158	25.4286	25.4815	25.3931
3.28905	1.28581	AT5G16510.2 | Symbols: | Alpha-1,4-glucan-protein synthase family protein | chr5:5393296-5394342 FORWARD LENGTH=348;AT5G16510.1 | Symbols: | Alpha-1,4-glucan-protein synthase family protein | chr5:5393296-5394342 FORWARD LENGTH=348	AT5G16510.2;AT5G16510.1	AT5G16510.2;AT5G16510.1		28	27	27	81.3	79.3	79.3	38.585	0	323.31	5780700000	280	24.8984	24.976	24.3451	24.3456	26.1681	25.8125	25.829	25.8989
0.675931	1.27612	AT3G27850.1 | Symbols: RPL12-C | ribosomal protein L12-C | chr3:10324905-10325468 FORWARD LENGTH=187;AT3G27830.1 | Symbols: RPL12-A, RPL12 | ribosomal protein L12-A | chr3:10318576-10319151 FORWARD LENGTH=191	AT3G27850.1;AT3G27830.1	AT3G27850.1;AT3G27830.1		6	6	6	22.5	22.5	22.5	19.682	0	183.75	1707400000	107	21.0341	23.1765	20.8982	20.8409	20.6553	23.699	23.093	23.6068
3.85528	1.27299	AT5G49810.1 | Symbols: MMT | methionine S-methyltransferase | chr5:20239418-20246046 FORWARD LENGTH=1071	AT5G49810.1	AT5G49810.1		74	74	74	78	78	78	118.71	0	323.31	23804000000	855	26.2631	26.4841	26.0921	26.0355	27.3071	27.7645	27.5722	27.323
1.75718	1.2633	ATCG00670.1 | Symbols: CLPP1, PCLPP | plastid-encoded CLP P | chrC:69910-71882 REVERSE LENGTH=196	ATCG00670.1	ATCG00670.1		8	8	8	40.8	40.8	40.8	22.097	0	167.48	1574000000	85	23.0069	23.4229	23.422	23.4246	23.4785	24.8262	25.1477	24.8771
2.06937	1.26291	AT2G30870.1 | Symbols: ATGSTF10, ERD13, ATGSTF4, GSTF10 | glutathione S-transferase PHI 10 | chr2:13141490-13142392 FORWARD LENGTH=215	AT2G30870.1	AT2G30870.1		25	25	23	58.6	58.6	58.6	24.23	0	323.31	11958000000	346	25.655	26.34	25.6706	24.8825	27.0772	27.1493	26.5349	26.8385
2.14776	1.25625	AT1G20020.1 | Symbols: ATLFNR2, FNR2 | ferredoxin-NADP(+)-oxidoreductase 2 | chr1:6942851-6944868 FORWARD LENGTH=369;AT1G20020.2 | Symbols: ATLFNR2 | ferredoxin-NADP(+)-oxidoreductase 2 | chr1:6942851-6944868 FORWARD LENGTH=350;AT1G20020.3 | Symbols: ATLFN	AT1G20020.1;AT1G20020.2;AT1G20020.3	AT1G20020.1;AT1G20020.2;AT1G20020.3		11	11	10	47.7	47.7	44.7	41.168	0	64.095	307020000	66	20.926	20.9178	21.0998	21.8242	21.8174	22.5432	22.5175	22.9147
0.632038	1.24771	AT3G07480.1 | Symbols: | 2Fe-2S ferredoxin-like superfamily protein | chr3:2389026-2389505 FORWARD LENGTH=159	AT3G07480.1	AT3G07480.1		10	10	10	64.8	64.8	64.8	17.602	0	125.29	6352400000	98	20.902	20.9118	21.0718	20.8217	20.7265	20.3792	23.9083	23.684
2.38461	1.24457	AT3G56310.2 | Symbols: | Melibiase family protein | chr3:20882886-20885745 FORWARD LENGTH=413;AT3G56310.1 | Symbols: | Melibiase family protein | chr3:20882886-20885745 FORWARD LENGTH=437	AT3G56310.2;AT3G56310.1	AT3G56310.2;AT3G56310.1		11	11	11	40	40	40	45.637	0	95.665	1368500000	96	23.2202	23.7629	23.1294	23.1806	25.1156	24.5097	23.9805	24.6656
3.92762	1.24073	AT5G37830.1 | Symbols: OXP1 | oxoprolinase 1 | chr5:15056635-15060525 REVERSE LENGTH=1266	AT5G37830.1	AT5G37830.1		67	67	67	69.8	69.8	69.8	137.53	0	323.31	5746600000	490	23.7331	23.8992	23.7468	23.3492	25.1313	24.953	24.8048	24.8021
2.80256	1.2407	AT1G54630.1 | Symbols: ACP3 | acyl carrier protein 3 | chr1:20401642-20402919 REVERSE LENGTH=136;AT1G54630.2 | Symbols: ACP3 | acyl carrier protein 3 | chr1:20401993-20402919 REVERSE LENGTH=107;AT1G54580.1 | Symbols: ACP2 | acyl carrier protein 2 | chr1:20	AT1G54630.1;AT1G54630.2;AT1G54580.1	AT1G54630.1;AT1G54630.2;AT1G54580.1		3	3	3	28.7	28.7	28.7	14.65	0	273.87	4069200000	117	24.707	24.6257	24.602	25.4878	26.1722	25.9834	26.2908	25.9389
2.88833	1.2402	AT4G09000.1 | Symbols: GRF1, GF14 CHI | general regulatory factor 1 | chr4:5775387-5777157 FORWARD LENGTH=267;AT4G09000.2 | Symbols: GRF1, GF14 CHI | general regulatory factor 1 | chr4:5775387-5777157 FORWARD LENGTH=318	AT4G09000.1;AT4G09000.2	AT4G09000.1;AT4G09000.2		27	15	15	79.4	57.3	57.3	29.931	0	323.31	17320000000	312	26.9171	27.0006	26.7915	26.5738	28.5972	28.0888	27.6718	27.8861
0.655169	1.23881	AT4G10480.1 | Symbols: | Nascent polypeptide-associated complex (NAC), alpha subunit family protein | chr4:6478089-6479079 REVERSE LENGTH=212;AT4G10480.2 | Symbols: | Nascent polypeptide-associated complex (NAC), alpha subunit family protein | chr4:64780	AT4G10480.1;AT4G10480.2	AT4G10480.1;AT4G10480.2		12	11	11	62.3	62.3	62.3	23.171	0	104.51	1215500000	131	24.633	24.28	21.0739	25.0101	24.9756	24.7708	25.0919	25.1139
0.969153	1.23726	AT2G26230.1 | Symbols: | uricase / urate oxidase / nodulin 35, putative | chr2:11164956-11166968 FORWARD LENGTH=309	AT2G26230.1	AT2G26230.1		18	18	18	61.8	61.8	61.8	34.88	0	191.38	1503100000	89	21.0615	20.7985	21.1794	21.0341	22.3506	22.7077	20.4504	23.5139
5.37231	1.23478	AT1G56450.1 | Symbols: PBG1 | 20S proteasome beta subunit G1 | chr1:21141970-21144186 FORWARD LENGTH=246	AT1G56450.1	AT1G56450.1		18	18	18	79.3	79.3	79.3	27.651	0	323.31	6955000000	249	25.483	25.324	25.4111	25.3953	26.4659	26.8143	26.6562	26.616
1.03085	1.2346	AT1G15710.1 | Symbols: | prephenate dehydrogenase family protein | chr1:5404505-5405581 FORWARD LENGTH=358	AT1G15710.1	AT1G15710.1		13	13	13	44.7	44.7	44.7	40.633	0	168.49	695410000	99	20.8249	21.075	21.082	20.7123	22.5744	22.8484	20.3333	22.8766
3.48919	1.22989	AT1G30510.3 | Symbols: ATRFNR2, RFNR2 | root FNR 2 | chr1:10807150-10808292 REVERSE LENGTH=317;AT1G30510.1 | Symbols: ATRFNR2, RFNR2 | root FNR 2 | chr1:10807150-10808984 REVERSE LENGTH=381;AT1G30510.2 | Symbols: ATRFNR2, RFNR2 | root FNR 2 | chr1:10807150	AT1G30510.3;AT1G30510.1;AT1G30510.2	AT1G30510.3;AT1G30510.1;AT1G30510.2		23	23	16	76	76	57.4	35.671	0	323.31	8577800000	379	24.4877	24.3717	24.1814	24.7897	25.9673	25.711	25.446	25.6257
0.659776	1.22922	AT3G05000.1 | Symbols: | Transport protein particle (TRAPP) component | chr3:1387444-1388697 REVERSE LENGTH=173	AT3G05000.1	AT3G05000.1		7	7	7	59.5	59.5	59.5	19.572	0	62.572	305210000	39	20.8164	22.8851	21.0674	20.9642	20.4255	23.6232	23.1653	23.4359
3.66958	1.22871	AT3G03780.3 | Symbols: ATMS2, MS2 | methionine synthase 2 | chr3:957602-960740 FORWARD LENGTH=765;AT3G03780.2 | Symbols: ATMS2, MS2 | methionine synthase 2 | chr3:957602-960740 FORWARD LENGTH=765;AT3G03780.1 | Symbols: ATMS2, MS2 | methionine synthase 2 |	AT3G03780.3;AT3G03780.2;AT3G03780.1	AT3G03780.3;AT3G03780.2;AT3G03780.1		61	25	25	65.9	40	40	84.583	0	323.31	4618300000	207	25.0458	25.7295	25.4201	25.2485	26.4728	26.5906	26.7388	26.5565
3.22601	1.22805	AT5G59290.1 | Symbols: UXS3, ATUXS3 | UDP-glucuronic acid decarboxylase 3 | chr5:23915814-23917953 REVERSE LENGTH=342;AT5G59290.2 | Symbols: UXS3, ATUXS3 | UDP-glucuronic acid decarboxylase 3 | chr5:23915814-23917998 REVERSE LENGTH=357	AT5G59290.1;AT5G59290.2	AT5G59290.1;AT5G59290.2		33	33	11	86.5	86.5	40.4	38.569	0	323.31	7347900000	373	24.7764	25.1881	25.4548	25.5617	26.6538	26.4189	26.474	26.3463
5.50977	1.22799	AT3G52880.1 | Symbols: ATMDAR1, MDAR1 | monodehydroascorbate reductase 1 | chr3:19601477-19604366 REVERSE LENGTH=434;AT3G52880.2 | Symbols: ATMDAR1, MDAR1 | monodehydroascorbate reductase 1 | chr3:19601477-19604366 REVERSE LENGTH=466	AT3G52880.1;AT3G52880.2	AT3G52880.1;AT3G52880.2		46	46	46	88	88	88	46.487	0	323.31	35407000000	840	26.7321	26.7567	26.6262	26.6518	28.0568	27.9262	27.9599	27.7359
1.58874	1.2266	AT3G02770.1 | Symbols: | Ribonuclease E inhibitor RraA/Dimethylmenaquinone methyltransferase | chr3:601017-601884 REVERSE LENGTH=166	AT3G02770.1	AT3G02770.1		7	5	5	41.6	29.5	29.5	17.836	0	80.816	318100000	30	22.435	22.2724	21.162	20.7557	22.7712	22.951	23.0102	22.7991
1.13303	1.22613	AT2G04700.1 | Symbols: | ferredoxin thioredoxin reductase catalytic beta chain family protein | chr2:1646961-1648345 FORWARD LENGTH=146	AT2G04700.1	AT2G04700.1		9	9	9	39	39	39	16.434	0	34.713	263060000	39	21.0279	20.9463	21.0433	21.0285	22.9184	22.9058	20.5569	22.5695
2.74902	1.21995	AT3G04400.2 | Symbols: emb2171 | Ribosomal protein L14p/L23e family protein | chr3:1167611-1168308 FORWARD LENGTH=125;AT3G04400.1 | Symbols: emb2171 | Ribosomal protein L14p/L23e family protein | chr3:1167339-1168308 FORWARD LENGTH=140;AT2G33370.1 | Symbol	AT3G04400.2;AT3G04400.1;AT2G33370.1;AT1G04480.1	AT3G04400.2;AT3G04400.1;AT2G33370.1;AT1G04480.1		20	20	20	88	88	88	13.406	0	299.25	14922000000	374	25.7718	25.5685	25.3869	25.7989	27.4168	26.437	26.6894	26.8628
3.63604	1.21694	AT4G04040.1 | Symbols: MEE51 | Phosphofructokinase family protein | chr4:1939250-1942765 FORWARD LENGTH=569	AT4G04040.1	AT4G04040.1		36	27	27	80.7	69.9	69.9	62.741	0	312.61	2495000000	204	23.5937	23.5838	23.0138	23.4202	24.7479	24.6813	24.3989	24.6511
3.92545	1.21036	AT5G16970.1 | Symbols: AT-AER, AER | alkenal reductase | chr5:5576291-5578001 REVERSE LENGTH=345	AT5G16970.1	AT5G16970.1		36	36	23	99.7	99.7	61.2	38.133	0	323.31	35152000000	759	27.6289	27.8945	27.456	27.4874	28.6513	29.0538	28.6943	28.9088
1.11111	1.21003	AT5G27450.3 | Symbols: MK | mevalonate kinase | chr5:9691051-9692975 FORWARD LENGTH=378;AT5G27450.2 | Symbols: MVK, MK | mevalonate kinase | chr5:9691051-9692975 FORWARD LENGTH=378;AT5G27450.1 | Symbols: MVK, MK | mevalonate kinase | chr5:9691051-9692975 F	AT5G27450.3;AT5G27450.2;AT5G27450.1	AT5G27450.3;AT5G27450.2;AT5G27450.1		10	10	10	33.1	33.1	33.1	40.643	0	57.141	422260000	62	21.086	23.0085	22.9168	21.1333	23.7215	23.3927	22.9502	22.9202
2.10466	1.20835	AT3G43600.1 | Symbols: AAO2, AO3, atAO-2, AOgamma, AtAO3 | aldehyde oxidase 2 | chr3:15512778-15517375 REVERSE LENGTH=1321	AT3G43600.1	AT3G43600.1		22	21	21	29.3	27.9	27.9	144.58	0	95.417	470030000	84	21.8603	22.0874	20.907	22.1249	22.8599	23.2179	22.6762	23.059
4.55291	1.20397	AT1G65930.1 | Symbols: cICDH | cytosolic NADP+-dependent isocitrate dehydrogenase | chr1:24539088-24541861 FORWARD LENGTH=410	AT1G65930.1	AT1G65930.1		58	58	51	84.9	84.9	81.7	45.746	0	323.31	68114000000	1161	27.9176	27.9539	27.7943	27.5931	29.083	29.1452	28.8306	29.0161
5.22691	1.19861	AT1G50480.1 | Symbols: THFS | 10-formyltetrahydrofolate synthetase | chr1:18702064-18704687 FORWARD LENGTH=634	AT1G50480.1;AT2G12280.1	AT1G50480.1		42	42	42	77.9	77.9	77.9	67.801	0	323.31	19482000000	665	26.2352	26.4328	26.0783	26.1846	27.3746	27.4363	27.3953	27.5192
1.15499	1.19453	AT4G21090.3 | Symbols: ATMFDX2, MFDX2 | MITOCHONDRIAL FERREDOXIN 2 | chr4:11256663-11258269 REVERSE LENGTH=197;AT4G21090.2 | Symbols: ATMFDX2, MFDX2 | MITOCHONDRIAL FERREDOXIN 2 | chr4:11256663-11258269 REVERSE LENGTH=197;AT4G21090.1 | Symbols: ATMFDX2,	AT4G21090.3;AT4G21090.2;AT4G21090.1	AT4G21090.3;AT4G21090.2;AT4G21090.1		5	5	3	51.3	51.3	41.1	22.121	0	39.098	1516900000	64	20.7506	20.8739	21.2025	20.8939	22.7348	22.5315	20.5281	22.7045
3.11974	1.19247	AT5G54500.1 | Symbols: FQR1 | flavodoxin-like quinone reductase 1 | chr5:22124674-22126256 FORWARD LENGTH=204;AT5G54500.2 | Symbols: FQR1 | flavodoxin-like quinone reductase 1 | chr5:22124674-22126435 FORWARD LENGTH=244	AT5G54500.1;AT5G54500.2	AT5G54500.1;AT5G54500.2		13	13	8	62.7	62.7	48	21.796	0	323.31	5449300000	182	25.8485	25.77	25.3198	25.449	26.5732	26.9015	27.1381	26.5445
1.91181	1.1917	AT5G04590.1 | Symbols: SIR | sulfite reductase | chr5:1319404-1322298 FORWARD LENGTH=642	AT5G04590.1	AT5G04590.1		37	37	37	56.7	56.7	56.7	71.949	0	323.31	6626900000	434	23.924	24.5163	24.3178	24.9879	25.8665	25.7826	24.8766	25.9872
0.615167	1.18612	AT2G33830.2 | Symbols: | Dormancy/auxin associated family protein | chr2:14309768-14310286 REVERSE LENGTH=108;AT2G33830.1 | Symbols: | Dormancy/auxin associated family protein | chr2:14309768-14310286 REVERSE LENGTH=106	AT2G33830.2;AT2G33830.1	AT2G33830.2;AT2G33830.1		8	8	8	89.8	89.8	89.8	11.656	0	76.339	390720000	57	21.1184	22.8932	20.8899	21.1242	24.1707	23.4386	20.5233	22.6377
6.0575	1.18315	AT3G29360.2 | Symbols: | UDP-glucose 6-dehydrogenase family protein | chr3:11267375-11268817 REVERSE LENGTH=480;AT3G29360.1 | Symbols: | UDP-glucose 6-dehydrogenase family protein | chr3:11267375-11268817 REVERSE LENGTH=480	AT3G29360.2;AT3G29360.1	AT3G29360.2;AT3G29360.1		57	57	26	96	96	56.9	53.172	0	323.31	52697000000	1033	27.3254	27.4091	27.3128	27.2192	28.5441	28.5947	28.406	28.4543
5.04837	1.18265	AT5G11950.2 | Symbols: | Putative lysine decarboxylase family protein | chr5:3855072-3856815 FORWARD LENGTH=216;AT5G11950.1 | Symbols: | Putative lysine decarboxylase family protein | chr5:3855072-3856815 FORWARD LENGTH=216	AT5G11950.2;AT5G11950.1	AT5G11950.2;AT5G11950.1		12	12	12	74.5	74.5	74.5	23.831	0	121.81	1364700000	103	23.2974	23.5539	23.3445	23.5248	24.4675	24.7212	24.682	24.5806
1.94834	1.18222	AT1G61570.1 | Symbols: TIM13 | translocase of the inner mitochondrial membrane 13 | chr1:22718897-22719473 REVERSE LENGTH=87	AT1G61570.1	AT1G61570.1		5	5	5	86.2	86.2	86.2	9.4116	0	139.56	2760700000	95	21.9735	22.1856	22.6003	22.8947	22.8915	23.6482	24.1026	23.7407
4.32858	1.1822	AT2G42910.1 | Symbols: | Phosphoribosyltransferase family protein | chr2:17856396-17858394 FORWARD LENGTH=337	AT2G42910.1	AT2G42910.1		21	21	21	69.1	69.1	69.1	37.56	0	323.31	7708600000	315	25.143	25.3846	25.1359	25.0126	26.5028	26.4494	26.1282	26.3246
3.53994	1.17531	AT1G21720.1 | Symbols: PBC1 | proteasome beta subunit C1 | chr1:7626394-7628070 FORWARD LENGTH=204	AT1G21720.1	AT1G21720.1		12	12	4	59.3	59.3	26	22.798	0	323.31	5101600000	202	25.4015	25.3962	25.3007	24.8277	26.2393	26.6102	26.3892	26.3886
1.92229	1.17414	AT3G06540.1 | Symbols: REP, AthREP | Rab escort protein | chr3:2035201-2037662 REVERSE LENGTH=563	AT3G06540.1	AT3G06540.1		15	15	15	38.5	38.5	38.5	61.51	0	109.49	358580000	72	22.268	20.8746	21.2846	20.8969	22.3848	22.4898	22.6289	22.5172
2.58931	1.16997	AT5G59160.3 | Symbols: TOPP2, PPO | type one serine/threonine protein phosphatase 2 | chr5:23879567-23881102 FORWARD LENGTH=312;AT5G59160.2 | Symbols: TOPP2, PPO | type one serine/threonine protein phosphatase 2 | chr5:23879567-23881102 FORWARD LENGTH=312;	AT5G59160.3;AT5G59160.2;AT5G59160.1;AT5G43380.3;AT5G43380.2;AT5G43380.1;AT1G64040.1	AT5G59160.3;AT5G59160.2;AT5G59160.1		22	22	13	75.3	75.3	50	35.531	0	165.38	1214900000	115	23.9357	23.6606	23.392	23.1415	24.788	25.0992	24.3246	24.5979
3.26503	1.16942	AT5G01410.1 | Symbols: PDX1, ATPDX1.3, RSR4, PDX1.3, ATPDX1 | Aldolase-type TIM barrel family protein | chr5:172576-173505 REVERSE LENGTH=309	AT5G01410.1	AT5G01410.1		16	15	10	72.8	69.9	53.4	33.216	0	323.31	4837200000	217	24.2984	24.637	24.4489	24.7371	25.8959	25.7952	25.2688	25.8391
4.27672	1.16731	AT5G15650.1 | Symbols: RGP2, ATRGP2 | reversibly glycosylated polypeptide 2 | chr5:5092203-5094093 FORWARD LENGTH=360	AT5G15650.1	AT5G15650.1		45	45	21	96.9	96.9	61.7	40.89	0	323.31	60297000000	748	28.4826	28.6215	28.343	28.2045	29.3769	29.7101	29.5969	29.6368
2.39696	1.16642	AT3G23600.1 | Symbols: | alpha/beta-Hydrolases superfamily protein | chr3:8473833-8475655 FORWARD LENGTH=239;AT3G23600.2 | Symbols: | alpha/beta-Hydrolases superfamily protein | chr3:8473833-8475655 FORWARD LENGTH=236	AT3G23600.1;AT3G23600.2	AT3G23600.1;AT3G23600.2		19	19	19	90.8	90.8	90.8	25.861	0	290.4	5419500000	203	25.7252	25.2993	24.8652	24.9942	26.2028	26.6564	25.9916	26.6988
6.58734	1.166	AT1G54100.2 | Symbols: ALDH7B4 | aldehyde dehydrogenase 7B4 | chr1:20195435-20198853 REVERSE LENGTH=508;AT1G54100.1 | Symbols: ALDH7B4 | aldehyde dehydrogenase 7B4 | chr1:20195435-20198853 REVERSE LENGTH=508	AT1G54100.2;AT1G54100.1	AT1G54100.2;AT1G54100.1		32	32	32	77.8	77.8	77.8	54.208	0	323.31	4113300000	277	24.1061	24.1467	24.2998	24.1482	25.355	25.3208	25.304	25.3849
3.74874	1.1632	AT4G20850.1 | Symbols: TPP2 | tripeptidyl peptidase ii | chr4:11160935-11169889 REVERSE LENGTH=1380	AT4G20850.1	AT4G20850.1		79	79	79	67	67	67	152.37	0	323.31	6190300000	499	23.8455	23.7574	23.4629	23.7486	25.212	24.7492	24.7468	24.759
2.13599	1.15988	AT2G19730.3 | Symbols: | Ribosomal L28e protein family | chr2:8511752-8512995 FORWARD LENGTH=143;AT2G19730.2 | Symbols: | Ribosomal L28e protein family | chr2:8511752-8512995 FORWARD LENGTH=143;AT2G19730.1 | Symbols: | Ribosomal L28e protein family | ch	AT2G19730.3;AT2G19730.2;AT2G19730.1	AT2G19730.3;AT2G19730.2;AT2G19730.1		10	9	9	57.3	57.3	57.3	15.895	0	236.44	8646600000	235	25.5626	25.0225	25.7408	26.3706	27.0011	26.7145	26.9698	26.6505
5.27968	1.15737	AT5G15490.1 | Symbols: | UDP-glucose 6-dehydrogenase family protein | chr5:5027872-5029314 REVERSE LENGTH=480	AT5G15490.1;AT3G01010.1	AT5G15490.1		50	23	22	92.3	56.5	53.8	53.117	0	323.31	6457900000	294	24.8199	24.9392	24.7379	24.9107	26.1882	25.9557	25.9121	25.9811
0.596181	1.15223	AT2G09990.1 | Symbols: | Ribosomal protein S5 domain 2-like superfamily protein | chr2:3781442-3781882 FORWARD LENGTH=146	AT2G09990.1	AT2G09990.1		15	2	2	69.2	8.2	8.2	16.631	0	6.8682	873830000	59	24.4084	24.3762	20.9297	24.3814	23.8465	24.9822	25.1526	24.7233
3.76016	1.14529	AT5G08100.1 | Symbols: | N-terminal nucleophile aminohydrolases (Ntn hydrolases) superfamily protein | chr5:2593242-2594586 REVERSE LENGTH=315;AT5G08100.2 | Symbols: | N-terminal nucleophile aminohydrolases (Ntn hydrolases) superfamily protein | chr5:259	AT5G08100.1;AT5G08100.2	AT5G08100.1;AT5G08100.2		13	13	13	57.5	57.5	57.5	33.027	0	236.46	1006600000	108	23.3006	23.1453	22.6706	22.9584	24.1996	24.1018	24.2346	24.12
3.02486	1.14417	AT2G22400.1 | Symbols: | S-adenosyl-L-methionine-dependent methyltransferases superfamily protein | chr2:9504823-9508788 REVERSE LENGTH=808	AT2G22400.1;AT4G40000.1	AT2G22400.1		64	64	64	72.3	72.3	72.3	89.811	0	323.31	16860000000	676	26.2349	26.2733	26.11	26.1558	27.8316	27.1027	27.0037	27.4126
2.89048	1.1427	AT1G69800.1 | Symbols: | Cystathionine beta-synthase (CBS) protein | chr1:26274416-26276105 REVERSE LENGTH=447;AT1G69800.2 | Symbols: | Cystathionine beta-synthase (CBS) protein | chr1:26274416-26276325 REVERSE LENGTH=476	AT1G69800.1;AT1G69800.2	AT1G69800.1;AT1G69800.2		16	16	16	48.8	48.8	48.8	47.817	0	151.19	1291200000	114	23.5582	23.3851	24.1346	23.6298	25.0158	25.0396	24.5818	24.6413
3.21531	1.14083	AT5G42790.1 | Symbols: PAF1, ATPSM30, ARS5 | proteasome alpha subunit F1 | chr5:17159270-17160975 REVERSE LENGTH=278	AT5G42790.1	AT5G42790.1		24	24	7	92.8	92.8	37.4	30.476	0	323.31	8818200000	313	25.6325	25.5629	25.3907	25.345	26.946	26.7112	26.1811	26.6559
4.85742	1.13987	AT1G11840.4 | Symbols: ATGLX1, GLX1 | glyoxalase I homolog | chr1:3996045-3997518 FORWARD LENGTH=283;AT1G11840.3 | Symbols: ATGLX1, GLX1 | glyoxalase I homolog | chr1:3996045-3997518 FORWARD LENGTH=283;AT1G11840.2 | Symbols: ATGLX1, GLX1 | glyoxalase I hom	AT1G11840.4;AT1G11840.3;AT1G11840.2;AT1G11840.1;AT1G11840.6;AT1G11840.5	AT1G11840.4;AT1G11840.3;AT1G11840.2;AT1G11840.1;AT1G11840.6;AT1G11840.5		21	21	19	56.9	56.9	54.4	31.928	0	323.31	6447800000	181	25.3509	25.063	25.2706	25.4228	26.4117	26.5275	26.4112	26.3164
1.25244	1.1387	AT5G42890.1 | Symbols: ATSCP2, SCP2 | sterol carrier protein 2 | chr5:17194458-17195910 REVERSE LENGTH=123	AT5G42890.1	AT5G42890.1		9	9	9	62.6	62.6	62.6	13.568	0	78.648	3119200000	103	22.086	22.5407	21.0207	20.8535	22.4533	23.2798	22.2212	23.1013
0.714646	1.13854	AT5G67510.1 | Symbols: | Translation protein SH3-like family protein | chr5:26937970-26938410 REVERSE LENGTH=146	AT5G67510.1	AT5G67510.1		7	5	5	33.6	27.4	27.4	16.79	0	44.523	371390000	37	23.849	23.5938	23.497	20.7132	24.1422	23.9347	24.6535	23.4768
2.46033	1.13771	AT1G50110.1 | Symbols: | D-aminoacid aminotransferase-like PLP-dependent enzymes superfamily protein | chr1:18558203-18560219 REVERSE LENGTH=356	AT1G50110.1;AT1G50090.1	AT1G50110.1		20	20	20	78.7	78.7	78.7	38.861	0	177.9	1537700000	128	23.1864	23.7672	23.0006	23.6694	24.1769	24.5941	24.9422	24.4612
4.91976	1.13588	AT5G17920.1 | Symbols: ATCIMS, ATMETS, ATMS1 | Cobalamin-independent synthase family protein | chr5:5935771-5939195 FORWARD LENGTH=765;AT5G17920.2 | Symbols: ATCIMS | Cobalamin-independent synthase family protein | chr5:5935771-5939195 FORWARD LENGTH=765	AT5G17920.1;AT5G17920.2;AT2G43800.1	AT5G17920.1;AT5G17920.2		79	79	42	77.3	77.3	55.9	84.356	0	323.31	253390000000	2250	29.2666	29.4453	29.239	29.136	30.2532	30.4555	30.5252	30.3964
4.80552	1.1342	AT4G33090.1 | Symbols: APM1, ATAPM1 | aminopeptidase M1 | chr4:15965915-15970418 REVERSE LENGTH=879	AT4G33090.1	AT4G33090.1		50	50	50	59.8	59.8	59.8	98.178	0	323.31	4752400000	364	24.4214	24.5377	24.5439	24.3094	25.7778	25.5642	25.5745	25.4326
3.15224	1.13031	AT2G42600.1 | Symbols: ATPPC2, PPC2 | phosphoenolpyruvate carboxylase 2 | chr2:17734541-17738679 REVERSE LENGTH=963;AT2G42600.2 | Symbols: ATPPC2, PPC2 | phosphoenolpyruvate carboxylase 2 | chr2:17734541-17738679 REVERSE LENGTH=963	AT2G42600.1;AT2G42600.2;AT3G42628.1	AT2G42600.1;AT2G42600.2		70	44	43	76.3	56.1	55.1	109.75	0	323.31	3072300000	288	23.1176	23.506	23.469	23.4454	24.9175	24.1796	24.5281	24.4342
5.86395	1.12744	AT1G70310.1 | Symbols: SPDS2 | spermidine synthase 2 | chr1:26485497-26487352 REVERSE LENGTH=340	AT1G70310.1	AT1G70310.1		17	17	13	72.4	72.4	55	37.14	0	323.31	3301300000	171	23.9946	24.2681	24.1331	24.1917	25.2828	25.2565	25.308	25.2501
0.743615	1.12563	AT5G55730.2 | Symbols: FLA1 | FASCICLIN-like arabinogalactan 1 | chr5:22558375-22560392 REVERSE LENGTH=424;AT5G55730.1 | Symbols: FLA1 | FASCICLIN-like arabinogalactan 1 | chr5:22558375-22560392 REVERSE LENGTH=424	AT5G55730.2;AT5G55730.1	AT5G55730.2;AT5G55730.1		8	8	8	31.6	31.6	31.6	44.849	0	79.713	1001500000	75	20.579	23.357	21.0658	23.3317	23.4636	23.0338	23.3166	23.022
3.94493	1.1231	AT2G27020.1 | Symbols: PAG1 | 20S proteasome alpha subunit G1 | chr2:11528515-11530858 REVERSE LENGTH=249	AT2G27020.1	AT2G27020.1		24	24	24	74.3	74.3	74.3	27.377	0	276.61	6222800000	251	25.4924	25.4126	25.3244	25.504	26.905	26.5149	26.424	26.382
2.18946	1.12072	AT3G04520.1 | Symbols: THA2 | threonine aldolase 2 | chr3:1217397-1219571 REVERSE LENGTH=355;AT3G04520.2 | Symbols: THA2 | threonine aldolase 2 | chr3:1217397-1219571 REVERSE LENGTH=354	AT3G04520.1;AT3G04520.2	AT3G04520.1;AT3G04520.2		10	10	10	42.5	42.5	42.5	38.252	0	49.202	275180000	46	21.251	21.1391	21.6654	22.3145	22.8531	22.5901	22.6062	22.8035
4.35783	1.11682	AT5G16760.1 | Symbols: | Inositol 1,3,4-trisphosphate 5/6-kinase family protein | chr5:5509890-5510849 FORWARD LENGTH=319	AT5G16760.1	AT5G16760.1		27	27	27	90	90	90	36.219	0	323.31	3207400000	212	24.0599	24.1508	23.9226	24.1213	25.0079	25.0351	25.2975	25.3814
2.34237	1.11513	AT4G02580.1 | Symbols: | NADH-ubiquinone oxidoreductase 24 kDa subunit, putative | chr4:1134586-1136906 FORWARD LENGTH=255	AT4G02580.1	AT4G02580.1		17	17	17	48.6	48.6	48.6	28.388	0	304.12	4788900000	221	20.9359	20.7262	21.2317	20.9603	22.0043	21.5889	22.704	22.0173
2.01538	1.11412	AT4G36940.1 | Symbols: NAPRT1 | nicotinate phosphoribosyltransferase 1 | chr4:17416938-17419883 FORWARD LENGTH=559	AT4G36940.1	AT4G36940.1		12	12	5	35.2	35.2	19.5	62.42	0	63.184	476540000	77	21.9375	22.0989	21.0461	22.3496	23.2046	22.835	23.0335	22.8155
1.04733	1.11284	AT1G32470.1 | Symbols: | Single hybrid motif superfamily protein | chr1:11739479-11740246 REVERSE LENGTH=166	AT1G32470.1	AT1G32470.1		5	5	4	46.4	46.4	34.3	17.897	0	67.974	1104300000	67	20.9039	20.7382	21.2326	20.9873	20.5115	22.4154	22.3906	22.9959
2.69706	1.11169	AT3G46940.1 | Symbols: DUT1 | DUTP-PYROPHOSPHATASE-LIKE 1 | chr3:17288367-17288867 REVERSE LENGTH=166	AT3G46940.1	AT3G46940.1		6	6	6	43.4	43.4	43.4	17.557	0	175.48	1926400000	83	24.9447	24.539	24.6572	24.9419	25.6948	25.7352	26.4427	25.6569
2.55895	1.10834	AT5G06580.1 | Symbols: | FAD-linked oxidases family protein | chr5:2011486-2016473 REVERSE LENGTH=567	AT5G06580.1	AT5G06580.1		14	14	14	33.9	33.9	33.9	62.175	0	79.632	408060000	85	20.5205	21.0843	21.0395	20.6778	21.5258	22.0718	22.3648	21.7931
0.514941	1.10537	AT5G46020.1 | Symbols: | CONTAINS InterPro DOMAIN/s: Casein kinase substrate, phosphoprotein PP28 (InterPro:IPR019380);Has 30201 Blast hits to 17322 proteins in 780 species: Archae - 12;Bacteria - 1396;Metazoa - 17338;Fungi - 3422;Plants - 5037;Viru	AT5G46020.1	AT5G46020.1		8	8	8	35.4	35.4	35.4	18.977	0	167.79	1084300000	76	24.8403	24.7044	20.97	24.9975	25.451	24.6093	24.9962	24.8771
4.10176	1.10359	AT3G51780.1 | Symbols: ATBAG4, BAG4 | BCL-2-associated athanogene 4 | chr3:19207029-19208178 REVERSE LENGTH=269	AT3G51780.1	AT3G51780.1		12	12	12	71	71	71	29.21	0	98.218	1411300000	83	23.7207	23.5688	23.6159	24.0444	24.8103	24.7559	24.9713	24.8267
1.64348	1.10258	AT4G27585.1 | Symbols: | SPFH/Band 7/PHB domain-containing membrane-associated protein family | chr4:13766984-13769832 REVERSE LENGTH=411	AT4G27585.1	AT4G27585.1		33	33	24	72.5	72.5	62.8	45.02	0	323.31	19606000000	424	21.0143	20.9293	20.8872	20.8067	21.0318	21.9332	22.655	22.4278
5.24832	1.10103	AT3G16050.1 | Symbols: A37, ATPDX1.2, PDX1.2 | pyridoxine biosynthesis 1.2 | chr3:5444121-5445065 REVERSE LENGTH=314	AT3G16050.1	AT3G16050.1		24	24	23	90.4	90.4	87.6	33.835	0	323.31	6774900000	310	25.3418	25.3413	25.1146	25.332	26.5184	26.3837	26.3244	26.3074
1.20975	1.09777	AT2G14170.2 | Symbols: ALDH6B2 | aldehyde dehydrogenase 6B2 | chr2:5977727-5981489 REVERSE LENGTH=498;AT2G14170.1 | Symbols: ALDH6B2 | aldehyde dehydrogenase 6B2 | chr2:5977727-5981899 REVERSE LENGTH=607;AT2G14170.3 | Symbols: ALDH6B2 | aldehyde dehydrog	AT2G14170.2;AT2G14170.1;AT2G14170.3	AT2G14170.2;AT2G14170.1;AT2G14170.3		17	17	17	41.6	41.6	41.6	53.406	0	67.868	1202200000	98	20.8518	20.8085	21.221	20.7165	20.6633	22.109	22.788	22.4286
2.99529	1.09652	AT2G32520.1 | Symbols: | alpha/beta-Hydrolases superfamily protein | chr2:13805823-13807442 REVERSE LENGTH=239	AT2G32520.1	AT2G32520.1		14	14	14	53.6	53.6	53.6	25.921	0	183.59	4451200000	155	24.7475	25.392	25.262	25.1611	26.2552	26.0176	26.1074	26.5685
5.1089	1.09623	AT3G04120.1 | Symbols: GAPC, GAPC-1, GAPC1 | glyceraldehyde-3-phosphate dehydrogenase C subunit 1 | chr3:1081077-1083131 FORWARD LENGTH=338	AT3G04120.1	AT3G04120.1		49	49	13	90.5	90.5	45	36.914	0	323.31	355470000000	1731	30.8393	30.9973	30.763	30.8409	31.8788	31.9503	32.1275	31.8688
3.02285	1.0956	AT2G27720.1 | Symbols: | 60S acidic ribosomal protein family | chr2:11818696-11819370 FORWARD LENGTH=115;AT2G27720.3 | Symbols: | 60S acidic ribosomal protein family | chr2:11818696-11819370 FORWARD LENGTH=127;AT2G27720.2 | Symbols: | 60S acidic ribosom	AT2G27720.1;AT2G27720.3;AT2G27720.2;AT3G44590.2;AT3G44590.1	AT2G27720.1;AT2G27720.3;AT2G27720.2		16	16	10	100	100	74.8	11.452	0	323.31	10958000000	326	26.491	26.4022	25.9845	25.78	27.283	27.3336	27.3594	27.064
0.917883	1.09272	AT1G78680.1 | Symbols: ATGGH2, GGH2 | gamma-glutamyl hydrolase 2 | chr1:29593933-29596037 FORWARD LENGTH=347;AT1G78680.2 | Symbols: GGH2 | gamma-glutamyl hydrolase 2 | chr1:29593933-29595968 FORWARD LENGTH=333	AT1G78680.1;AT1G78680.2	AT1G78680.1;AT1G78680.2		10	10	10	53	53	53	38.642	0	98.325	530410000	57	23.3919	23.275	23.2855	20.9651	24.236	23.7233	23.6587	23.6703
3.25047	1.08621	AT5G63680.1 | Symbols: | Pyruvate kinase family protein | chr5:25490507-25492530 FORWARD LENGTH=510	AT5G63680.1	AT5G63680.1		34	34	18	78.2	78.2	46.9	55.017	0	323.31	8568600000	455	25.0648	24.4591	24.9296	25.0373	25.7647	25.9532	25.9473	26.1704
1.40662	1.08249	AT5G42960.1 | Symbols: | unknown protein;FUNCTIONS IN: molecular_function unknown;INVOLVED IN: biological_process unknown;LOCATED IN: mitochondrion, chloroplast, plastid, chloroplast envelope;EXPRESSED IN: 24 plant structures;EXPRESSED DURING: 13 gro	AT5G42960.1	AT5G42960.1		16	16	16	81.2	81.2	81.2	23.41	0	138.56	2885100000	160	21.3484	20.7081	21.1903	22.5107	22.6753	22.1185	22.8298	22.4639
2.18736	1.08146	AT4G02930.1 | Symbols: | GTP binding Elongation factor Tu family protein | chr4:1295751-1298354 REVERSE LENGTH=454	AT4G02930.1	AT4G02930.1		46	46	45	80.2	80.2	80.2	49.409	0	323.31	56469000000	1028	23.1094	23.5006	23.5099	24.2593	24.4449	24.5286	24.8309	24.9006
0.500487	1.07851	AT5G58005.2 | Symbols: | Cytochrome c oxidase, subunit Vib family protein | chr5:23482234-23482757 FORWARD LENGTH=116;AT5G58005.1 | Symbols: | Cytochrome c oxidase, subunit Vib family protein | chr5:23482234-23482757 FORWARD LENGTH=116	AT5G58005.2;AT5G58005.1	AT5G58005.2;AT5G58005.1		5	5	5	57.8	57.8	57.8	13.298	0	89.515	606770000	51	20.715	20.9821	21.1408	20.9866	24.0044	23.4169	20.6392	20.0781
3.06294	1.07787	AT4G23040.1 | Symbols: | Ubiquitin-like superfamily protein | chr4:12075672-12078622 REVERSE LENGTH=525	AT4G23040.1	AT4G23040.1		6	5	5	17.7	16	16	58.13	0	8.7176	58113000	17	20.8971	21.0133	21.2247	21.0693	22.5871	22.1157	21.965	21.848
3.95375	1.07522	AT1G42970.1 | Symbols: GAPB | glyceraldehyde-3-phosphate dehydrogenase B subunit | chr1:16127552-16129584 FORWARD LENGTH=447	AT1G42970.1	AT1G42970.1		10	7	7	28	19.7	19.7	47.659	0	30.561	127550000	28	21.1234	20.696	21.1287	20.9391	22.143	22.0987	22.0896	21.8568
3.10835	1.06961	AT4G36910.1 | Symbols: LEJ2, CDCP2 | Cystathionine beta-synthase (CBS) family protein | chr4:17391016-17393218 REVERSE LENGTH=236	AT4G36910.1	AT4G36910.1		7	7	7	41.5	41.5	41.5	25.768	0	75.164	167580000	32	21.1046	20.7606	20.8321	21.1326	21.8453	22.4533	21.8912	21.9186
3.65834	1.06863	AT5G15810.1 | Symbols: | N2,N2-dimethylguanosine tRNA methyltransferase | chr5:5157798-5161121 FORWARD LENGTH=691	AT5G15810.1	AT5G15810.1		21	21	15	37.9	37.9	29.2	76.999	0	209.07	1569300000	158	23.7608	23.7679	23.3934	23.6984	25.0142	24.5462	24.7096	24.625
3.6219	1.06759	AT1G52160.1 | Symbols: TRZ3 | tRNAse Z3 | chr1:19420911-19424419 REVERSE LENGTH=890	AT1G52160.1;AT3G16260.1	AT1G52160.1		14	14	14	28.7	28.7	28.7	98.639	0	49.938	144620000	42	20.987	20.5708	21.0677	20.9608	22.1024	22.102	21.8616	21.7906
0.707307	1.06609	AT1G50170.1 | Symbols: ATSIRB, SIRB | sirohydrochlorin ferrochelatase B | chr1:18582087-18583514 FORWARD LENGTH=225	AT1G50170.1	AT1G50170.1		5	5	5	35.1	35.1	35.1	24.925	0	51.266	214930000	32	20.9013	20.8092	21.4666	21.0336	19.9658	22.7445	22.8316	22.9331
1.55073	1.05928	AT1G07750.1 | Symbols: | RmlC-like cupins superfamily protein | chr1:2404300-2405863 REVERSE LENGTH=356	AT1G07750.1;AT2G28680.1	AT1G07750.1		20	20	20	69.1	69.1	69.1	38.31	0	323.31	7225500000	244	25.8722	26.1564	25.9078	24.5807	26.6508	26.4875	26.6641	26.9519
4.09944	1.0577	AT3G12290.1 | Symbols: | Amino acid dehydrogenase family protein | chr3:3919591-3921326 FORWARD LENGTH=299	AT3G12290.1	AT3G12290.1		18	18	18	66.2	66.2	66.2	31.589	0	207.5	2435600000	200	24.2752	24.2052	23.9216	23.8838	25.0086	25.222	25.2119	25.0741
2.29236	1.05607	AT5G42740.1 | Symbols: | Sugar isomerase (SIS) family protein | chr5:17136080-17140622 FORWARD LENGTH=560	AT5G42740.1	AT5G42740.1		39	39	39	86.8	86.8	86.8	61.717	0	323.31	8529300000	401	25.4602	25.1316	24.887	24.845	25.8518	26.5524	26.4053	25.7386
4.49553	1.05436	AT1G08110.3 | Symbols: | lactoylglutathione lyase family protein / glyoxalase I family protein | chr1:2535702-2537630 FORWARD LENGTH=185;AT1G08110.2 | Symbols: | lactoylglutathione lyase family protein / glyoxalase I family protein | chr1:2535702-2537630	AT1G08110.3;AT1G08110.2;AT1G08110.1;AT1G08110.4	AT1G08110.3;AT1G08110.2;AT1G08110.1;AT1G08110.4		15	15	15	85.4	85.4	85.4	20.848	0	230.04	1916600000	138	23.9525	23.916	23.8078	24.0038	24.7182	25.0538	25.0556	25.0701
5.7535	1.05087	AT2G44100.1 | Symbols: ATGDI1, AT-GDI1, GDI1 | guanosine nucleotide diphosphate dissociation inhibitor 1 | chr2:18241804-18244864 FORWARD LENGTH=445;AT2G44100.2 | Symbols: ATGDI1, AT-GDI1, GDI1 | guanosine nucleotide diphosphate dissociation inhibitor 1 |	AT2G44100.1;AT2G44100.2	AT2G44100.1;AT2G44100.2		32	22	20	78	56.9	48.5	49.818	0	323.31	8905600000	328	25.7313	25.8485	25.6126	25.8218	26.7468	26.807	26.8551	26.8088
4.79192	1.04475	AT3G06350.1 | Symbols: EMB3004, MEE32 | dehydroquinate dehydratase, putative / shikimate dehydrogenase, putative | chr3:1924536-1927701 REVERSE LENGTH=603	AT3G06350.1	AT3G06350.1		30	30	30	61.9	61.9	61.9	65.795	0	300.6	2290200000	223	22.5589	22.6013	22.8032	22.825	23.7165	23.6322	23.753	23.8658
4.02063	1.0437	AT3G51260.1 | Symbols: PAD1 | 20S proteasome alpha subunit PAD1 | chr3:19031086-19032746 FORWARD LENGTH=250;AT3G51260.2 | Symbols: PAD1 | 20S proteasome alpha subunit PAD1 | chr3:19031086-19032746 FORWARD LENGTH=243;AT5G66140.1 | Symbols: PAD2 | proteaso	AT3G51260.1;AT3G51260.2;AT5G66140.1	AT3G51260.1;AT3G51260.2;AT5G66140.1		24	24	24	82.8	82.8	82.8	27.337	0	323.31	12852000000	374	26.8589	26.905	26.6564	26.4168	27.6963	27.7902	27.7944	27.7309
0.587086	1.04222	AT1G53580.1 | Symbols: GLX2-3, ETHE1, GLY3 | glyoxalase II 3 | chr1:19991542-19993250 REVERSE LENGTH=294;AT1G53580.2 | Symbols: GLX2-3, ETHE1, GLY3 | glyoxalase II 3 | chr1:19991542-19993250 REVERSE LENGTH=294	AT1G53580.1;AT1G53580.2	AT1G53580.1;AT1G53580.2		10	10	10	43.9	43.9	43.9	32.332	0	124.9	1038200000	73	21.0237	20.9364	21.1622	22.8729	23.3362	20.4582	23.0508	23.3189
3.91403	1.04087	AT1G53310.3 | Symbols: ATPPC1, PEPC1, ATPEPC1, PPC1 | phosphoenolpyruvate carboxylase 1 | chr1:19884261-19888070 REVERSE LENGTH=967;AT1G53310.2 | Symbols: ATPPC1, PEPC1, ATPEPC1, PPC1 | phosphoenolpyruvate carboxylase 1 | chr1:19884261-19888070 REVERSE LEN	AT1G53310.3;AT1G53310.2;AT1G53310.1	AT1G53310.3;AT1G53310.2;AT1G53310.1		75	75	34	79.1	79.1	47.7	110.28	0	323.31	16554000000	874	25.5398	25.6566	25.3979	25.161	26.6037	26.3796	26.5266	26.4089
2.78522	1.03625	AT1G20450.2 | Symbols: LTI29, LTI45, ERD10 | Dehydrin family protein | chr1:7088235-7089107 REVERSE LENGTH=259;AT1G20450.1 | Symbols: LTI29, LTI45, ERD10 | Dehydrin family protein | chr1:7088235-7089107 REVERSE LENGTH=260	AT1G20450.2;AT1G20450.1	AT1G20450.2;AT1G20450.1		8	8	7	35.1	35.1	30.9	29.443	0	251.12	1503600000	82	23.6988	23.7723	23.7808	24.2289	25.2066	24.8386	25.0568	24.5238
1.81807	1.03601	AT1G03330.1 | Symbols: | Small nuclear ribonucleoprotein family protein | chr1:818161-819297 REVERSE LENGTH=93	AT1G03330.1	AT1G03330.1		9	9	9	83.9	83.9	83.9	10.694	0	71.087	723130000	81	23.0699	23.3631	22.4065	23.2404	24.5999	24.2284	23.6187	23.7768
1.98367	1.0356	AT4G13430.1 | Symbols: IIL1, ATLEUC1 | isopropyl malate isomerase large subunit 1 | chr4:7804194-7807789 REVERSE LENGTH=509	AT4G13430.1	AT4G13430.1		28	28	28	58.9	58.9	58.9	55.013	0	323.31	7642700000	548	23.3052	23.8366	23.1483	24.2811	24.804	24.6537	24.3754	24.8806
3.39097	1.02607	AT5G13850.1 | Symbols: NACA3 | nascent polypeptide-associated complex subunit alpha-like protein 3 | chr5:4471361-4472676 FORWARD LENGTH=204	AT5G13850.1	AT5G13850.1		12	12	7	70.6	70.6	57.8	22.057	0	323.31	8989500000	283	25.9049	25.7901	25.5718	25.3889	26.4712	26.7339	26.6535	26.9014
2.89182	1.02052	AT3G55620.1 | Symbols: emb1624 | Translation initiation factor IF6 | chr3:20634581-20636312 FORWARD LENGTH=245	AT3G55620.1	AT3G55620.1		6	6	6	35.5	35.5	35.5	26.482	0	110.13	1451000000	89	24.6498	24.5623	24.1647	23.9644	25.3023	25.5761	25.2231	25.3217
3.39228	1.02008	AT2G27530.2 | Symbols: PGY1 | Ribosomal protein L1p/L10e family | chr2:11763443-11764570 REVERSE LENGTH=216;AT2G27530.1 | Symbols: PGY1 | Ribosomal protein L1p/L10e family | chr2:11763443-11764570 REVERSE LENGTH=216	AT2G27530.2;AT2G27530.1	AT2G27530.2;AT2G27530.1		19	11	11	67.6	45.4	45.4	24.425	0	104.77	5053300000	162	25.3427	25.675	25.1948	25.6533	26.2433	26.5247	26.6175	26.5605
3.12268	1.00239	AT3G60245.1 | Symbols: | Zinc-binding ribosomal protein family protein | chr3:22268803-22269750 FORWARD LENGTH=92	AT3G60245.1;AT3G10950.1	AT3G60245.1		7	7	7	42.4	42.4	42.4	10.241	0	143.01	4285900000	141	25.8965	25.8099	25.9865	26.3823	27.3023	26.855	26.957	26.9706
2.46492	1.00156	AT1G05620.2 | Symbols: URH2 | uridine-ribohydrolase 2 | chr1:1679609-1681527 FORWARD LENGTH=302;AT1G05620.1 | Symbols: URH2 | uridine-ribohydrolase 2 | chr1:1679286-1681527 FORWARD LENGTH=322	AT1G05620.2;AT1G05620.1	AT1G05620.2;AT1G05620.1		4	4	4	15.9	15.9	15.9	32.528	0	10.54	126080000	19	20.9065	21.5351	21.2118	21.1063	22.5088	22.2652	22.2807	21.7112
3.27457	0.999468	AT2G42690.1 | Symbols: | alpha/beta-Hydrolases superfamily protein | chr2:17776356-17777682 REVERSE LENGTH=412	AT2G42690.1	AT2G42690.1		22	22	22	59.7	59.7	59.7	46.056	0	323.31	3083300000	209	24.4663	24.443	24.126	24.2331	25.0278	25.5154	25.1921	25.531
4.93745	0.998787	AT4G15790.1 | Symbols: | unknown protein;INVOLVED IN: biological_process unknown;LOCATED IN: chloroplast;EXPRESSED IN: 21 plant structures;EXPRESSED DURING: 13 growth stages;Has 411 Blast hits to 380 proteins in 121 species: Archae - 4;Bacteria - 10	AT4G15790.1	AT4G15790.1		9	9	9	87.8	87.8	87.8	16.53	0	128.73	674370000	66	22.9402	22.9579	22.6438	22.8785	23.795	23.8819	23.8881	23.8504
3.84021	0.998234	AT5G27850.1 | Symbols: | Ribosomal protein L18e/L15 superfamily protein | chr5:9873169-9874297 FORWARD LENGTH=187	AT5G27850.1	AT5G27850.1		24	24	11	72.2	72.2	43.3	20.967	0	323.31	18162000000	422	26.0163	26.1365	25.9859	26.2431	27.3745	27.1078	26.9676	26.9248
5.9995	0.996339	AT3G12490.1 | Symbols: ATCYSB, ATCYS6, CYSB | cystatin B | chr3:3960523-3961777 REVERSE LENGTH=201;AT3G12490.2 | Symbols: ATCYSB, ATCYS6, CYSB | cystatin B | chr3:3960523-3961876 REVERSE LENGTH=234	AT3G12490.1;AT3G12490.2	AT3G12490.1;AT3G12490.2		17	17	17	85.1	85.1	85.1	22.477	0	323.31	6615000000	302	25.2929	25.3856	25.3595	25.3538	26.3807	26.2223	26.4379	26.3364
4.88249	0.994927	AT5G56350.1 | Symbols: | Pyruvate kinase family protein | chr5:22820254-22822529 REVERSE LENGTH=498	AT5G56350.1;AT4G26390.1	AT5G56350.1		32	29	26	69.9	65.3	62.9	54.411	0	323.31	6992000000	318	24.8541	24.7691	24.7392	24.8781	25.616	25.7868	25.9163	25.9011
0.434222	0.994676	AT5G09390.2 | Symbols: | CD2-binding protein-related | chr5:2913591-2915803 FORWARD LENGTH=349;AT5G09390.1 | Symbols: | CD2-binding protein-related | chr5:2913591-2915803 FORWARD LENGTH=351	AT5G09390.2;AT5G09390.1	AT5G09390.2;AT5G09390.1		6	6	6	21.5	21.5	21.5	39.98	0	24.697	379940000	38	22.9434	22.8603	21.2483	20.9169	23.8692	20.3689	23.7464	23.9631
4.70407	0.993192	AT5G19550.1 | Symbols: ASP2, AAT2 | aspartate aminotransferase 2 | chr5:6598201-6601597 FORWARD LENGTH=405	AT5G19550.1;AT1G62800.1;AT1G62800.2	AT5G19550.1		49	49	44	97.3	97.3	93.1	44.266	0	323.31	69302000000	1285	27.5127	27.8488	27.6694	27.5817	28.5549	28.7383	28.6711	28.6209
0.769117	0.989767	AT5G52840.1 | Symbols: | NADH-ubiquinone oxidoreductase-related | chr5:21413718-21414794 FORWARD LENGTH=169	AT5G52840.1	AT5G52840.1		18	18	18	92.3	92.3	92.3	19.179	0	323.31	15944000000	304	20.9666	20.6557	21.1022	21.295	20.2677	21.9132	22.9053	22.8922
4.9004	0.987874	AT2G14260.2 | Symbols: PIP | proline iminopeptidase | chr2:6041441-6043475 REVERSE LENGTH=329;AT2G14260.1 | Symbols: PIP | proline iminopeptidase | chr2:6041441-6043869 REVERSE LENGTH=380	AT2G14260.2;AT2G14260.1	AT2G14260.2;AT2G14260.1		18	18	18	65.7	65.7	65.7	37.433	0	185.7	2083000000	182	23.9095	23.822	23.9829	23.9524	25.0607	24.9506	24.7429	24.8641
0.650097	0.985595	AT3G53870.1 | Symbols: | Ribosomal protein S3 family protein | chr3:19951547-19952782 FORWARD LENGTH=249	AT3G53870.1	AT3G53870.1		29	6	6	63.1	15.3	15.3	27.349	0	15.523	546600000	41	20.9765	23.5706	23.8496	23.8865	23.5674	24.1231	24.4872	24.0478
3.83736	0.985332	AT3G06610.1 | Symbols: | DNA-binding enhancer protein-related | chr3:2060837-2061845 FORWARD LENGTH=115	AT3G06610.1	AT3G06610.1		8	8	8	84.3	84.3	84.3	12.795	0	219.15	3338400000	116	25.39	25.3726	25.5977	25.6321	26.7102	26.395	26.5507	26.2778
4.15812	0.985054	AT1G11360.4 | Symbols: | Adenine nucleotide alpha hydrolases-like superfamily protein | chr1:3822171-3822899 REVERSE LENGTH=242;AT1G11360.3 | Symbols: | Adenine nucleotide alpha hydrolases-like superfamily protein | chr1:3822171-3822899 REVERSE LENGTH=24	AT1G11360.4;AT1G11360.3;AT1G11360.2;AT1G11360.1	AT1G11360.4;AT1G11360.3;AT1G11360.2;AT1G11360.1		11	11	11	64.5	64.5	64.5	26.508	0	145.85	786590000	86	23.2754	23.4247	23.0567	23.135	24.3558	24.2521	24.0727	24.1514
2.70978	0.978897	AT1G72680.1 | Symbols: ATCAD1, CAD1 | cinnamyl-alcohol dehydrogenase | chr1:27359346-27360876 REVERSE LENGTH=355	AT1G72680.1	AT1G72680.1		23	23	23	79.2	79.2	79.2	38.671	0	237.65	2164100000	172	24.5011	23.9181	24.1467	24.3224	25.3095	25.2918	24.7899	25.4127
5.5321	0.978856	AT5G48480.1 | Symbols: | Lactoylglutathione lyase / glyoxalase I family protein | chr5:19644814-19645658 FORWARD LENGTH=166	AT5G48480.1	AT5G48480.1		21	21	21	99.4	99.4	99.4	17.557	0	323.31	16265000000	352	26.1597	26.1654	26.123	26.2898	27.1108	27.2039	27.2715	27.0671
2.78396	0.978584	AT3G52570.1 | Symbols: | alpha/beta-Hydrolases superfamily protein | chr3:19501145-19502795 FORWARD LENGTH=335	AT3G52570.1	AT3G52570.1		22	22	22	71.9	71.9	71.9	37.527	0	323.31	2203600000	150	21.0299	20.8096	21.0365	20.9809	21.5662	21.9727	21.8372	22.3952
3.14577	0.97488	AT5G56760.1 | Symbols: ATSERAT1;1, SAT5, SAT-52, SERAT1;1 | serine acetyltransferase 1;1 | chr5:22961498-22962582 REVERSE LENGTH=312	AT5G56760.1	AT5G56760.1		8	8	8	54.2	54.2	54.2	32.77	0	242.34	1421300000	99	23.8297	23.9485	23.7747	23.3974	24.6864	24.8874	24.4504	24.8256
3.41979	0.973132	AT4G09320.1 | Symbols: NDPK1 | Nucleoside diphosphate kinase family protein | chr4:5923424-5924366 FORWARD LENGTH=169	AT4G09320.1	AT4G09320.1		18	18	18	81.7	81.7	81.7	18.814	0	323.31	22844000000	362	27.2203	27.2472	26.8802	27.4239	28.3762	28.0931	28.165	28.0298
3.77132	0.971469	AT2G30860.1 | Symbols: ATGSTF9, GLUTTR, ATGSTF7, GSTF9 | glutathione S-transferase PHI 9 | chr2:13139132-13140057 FORWARD LENGTH=215;AT2G30860.2 | Symbols: ATGSTF9, GLUTTR, ATGSTF7, GSTF9 | glutathione S-transferase PHI 9 | chr2:13139132-13140079 FORWARD L	AT2G30860.1;AT2G30860.2	AT2G30860.1;AT2G30860.2		19	17	17	67	61.9	61.9	24.146	0	88.954	2016800000	143	23.9302	24.2246	24.2404	24.4647	25.2847	25.2231	25.1447	25.0932
3.57396	0.968175	AT2G22475.1 | Symbols: GEM | GRAM domain family protein | chr2:9541523-9544778 FORWARD LENGTH=299;AT2G22475.2 | Symbols: GEM | GRAM domain family protein | chr2:9541523-9544242 FORWARD LENGTH=248	AT2G22475.1;AT2G22475.2	AT2G22475.1;AT2G22475.2		18	18	18	61.9	61.9	61.9	32.215	0	323.31	6171800000	332	25.0175	24.9854	25.2046	25.2732	26.4013	25.975	25.9441	26.033
2.50064	0.966918	AT4G29410.2 | Symbols: | Ribosomal L28e protein family | chr4:14468439-14469964 REVERSE LENGTH=143;AT4G29410.1 | Symbols: | Ribosomal L28e protein family | chr4:14468439-14469964 REVERSE LENGTH=143	AT4G29410.2;AT4G29410.1	AT4G29410.2;AT4G29410.1		11	11	10	52.4	52.4	52.4	15.91	0	173.22	6698700000	189	25.7459	25.2981	25.7897	26.2053	26.7556	26.5606	26.9479	26.6425
3.9497	0.965369	AT2G36530.1 | Symbols: LOS2, ENO2 | Enolase | chr2:15321081-15323786 REVERSE LENGTH=444	AT2G36530.1	AT2G36530.1		49	49	49	91.7	91.7	91.7	47.719	0	323.31	67546000000	1011	28.2451	28.287	28.0436	27.883	29.2393	29.0629	29.0024	29.0156
4.5929	0.963	AT5G48230.1 | Symbols: EMB1276, ACAT2 | acetoacetyl-CoA thiolase 2 | chr5:19552570-19555030 REVERSE LENGTH=398;AT5G48230.2 | Symbols: EMB1276, ACAT2 | acetoacetyl-CoA thiolase 2 | chr5:19552570-19555122 REVERSE LENGTH=403	AT5G48230.1;AT5G48230.2	AT5G48230.1;AT5G48230.2		15	15	15	69.1	69.1	69.1	40.876	0	208.17	1199000000	90	23.6817	23.8205	23.5783	23.8091	24.8459	24.5681	24.7064	24.6212
3.18673	0.962579	AT5G63990.1 | Symbols: | Inositol monophosphatase family protein | chr5:25613387-25615736 FORWARD LENGTH=357;AT5G63990.2 | Symbols: | Inositol monophosphatase family protein | chr5:25613387-25615470 FORWARD LENGTH=298	AT5G63990.1;AT5G63990.2	AT5G63990.1;AT5G63990.2		13	13	13	55.7	55.7	55.7	38.384	0	97.281	687420000	99	22.686	22.8397	22.7346	22.5595	24.0655	23.5091	23.4658	23.6298
3.78687	0.961941	AT1G60730.1 | Symbols: | NAD(P)-linked oxidoreductase superfamily protein | chr1:22358327-22360082 REVERSE LENGTH=345;AT1G60730.3 | Symbols: | NAD(P)-linked oxidoreductase superfamily protein | chr1:22358327-22360082 REVERSE LENGTH=365;AT1G60730.2 | Symb	AT1G60730.1;AT1G60730.3;AT1G60730.2;AT1G60750.1;AT1G10810.1	AT1G60730.1;AT1G60730.3;AT1G60730.2		22	17	16	49.9	39.1	31	37.857	0	180.31	1856300000	161	23.2724	23.3693	23.7465	23.6781	24.4769	24.4846	24.4796	24.473
5.83037	0.958543	AT3G60820.1 | Symbols: PBF1 | N-terminal nucleophile aminohydrolases (Ntn hydrolases) superfamily protein | chr3:22472038-22473809 REVERSE LENGTH=223;AT3G60820.3 | Symbols: PBF1 | N-terminal nucleophile aminohydrolases (Ntn hydrolases) superfamily protein	AT3G60820.1;AT3G60820.3;AT3G60820.2	AT3G60820.1;AT3G60820.3;AT3G60820.2		22	22	22	79.4	79.4	79.4	24.644	0	323.31	7390400000	283	25.4797	25.3754	25.3015	25.3888	26.4509	26.3137	26.3187	26.2962
1.25441	0.954447	AT3G16950.1 | Symbols: LPD1, ptlpd1 | lipoamide dehydrogenase 1 | chr3:5786761-5790383 REVERSE LENGTH=570;AT3G16950.2 | Symbols: LPD1, ptlpd1 | lipoamide dehydrogenase 1 | chr3:5786508-5790383 REVERSE LENGTH=623	AT3G16950.1;AT3G16950.2	AT3G16950.1;AT3G16950.2		26	13	13	59.1	33.5	33.5	60.756	0	323.31	3890500000	278	22.8317	23.3584	22.5513	23.6323	23.1152	24.1777	24.3568	24.5419
0.916166	0.953758	AT5G50810.1 | Symbols: TIM8 | translocase inner membrane subunit 8 | chr5:20675875-20676505 REVERSE LENGTH=77	AT5G50810.1	AT5G50810.1		8	8	8	94.8	94.8	94.8	8.7501	0	323.31	4843000000	129	20.8533	20.5115	21.9342	22.6918	22.5241	22.6929	21.9499	22.6389
3.43847	0.953598	AT5G65750.1 | Symbols: | 2-oxoglutarate dehydrogenase, E1 component | chr5:26304212-26307947 FORWARD LENGTH=1025	AT5G65750.1	AT5G65750.1		59	44	44	65.1	53.3	53.3	116.4	0	323.31	7552600000	378	20.9151	21.1222	21.069	20.8915	21.6195	22.023	21.9822	22.1877
2.27326	0.952274	AT4G11740.1 | Symbols: SAY1 | Ubiquitin-like superfamily protein | chr4:7071955-7075256 FORWARD LENGTH=564	AT4G11740.1	AT4G11740.1		23	23	22	63.7	63.7	63.7	62.349	0	185.17	1196400000	163	23.27	22.5529	22.7506	23.4901	24.0357	23.8332	23.9815	24.0223
0.634307	0.951719	AT2G25355.2 | Symbols: | PNAS-3 related | chr2:10801567-10803591 FORWARD LENGTH=213;AT2G25355.1 | Symbols: | PNAS-3 related | chr2:10801391-10803591 FORWARD LENGTH=241	AT2G25355.2;AT2G25355.1	AT2G25355.2;AT2G25355.1		5	5	5	38.5	38.5	38.5	23.622	0	41.374	211640000	25	20.9567	22.4936	21.0166	20.8349	23.1427	22.6883	20.5024	22.7753
2.8252	0.951471	AT2G39390.1 | Symbols: | Ribosomal L29 family protein | chr2:16450803-16451762 REVERSE LENGTH=123	AT2G39390.1	AT2G39390.1		14	14	3	70.7	70.7	16.3	14.231	0	118.31	2784200000	170	23.7908	23.7119	24.2273	24.4001	24.9137	24.9402	25.1107	24.9713
1.34531	0.951094	AT3G15660.2 | Symbols: ATGRX4, GRX4 | glutaredoxin 4 | chr3:5308134-5309383 REVERSE LENGTH=169;AT3G15660.1 | Symbols: ATGRX4, GRX4 | glutaredoxin 4 | chr3:5308134-5309383 REVERSE LENGTH=169	AT3G15660.2;AT3G15660.1	AT3G15660.2;AT3G15660.1		9	9	9	61.5	61.5	61.5	18.734	0	199.47	8885100000	201	20.8577	21.6835	21.0948	20.8619	21.7763	21.754	23.0444	21.7275
0.645224	0.945361	AT4G10750.1 | Symbols: | Phosphoenolpyruvate carboxylase family protein | chr4:6618724-6619800 FORWARD LENGTH=358	AT4G10750.1	AT4G10750.1		8	8	8	29.3	29.3	29.3	38.404	0	110.42	558070000	75	20.8096	20.6702	21.3187	21.3746	20.8673	20.9409	23.7118	22.4346
4.42725	0.94349	AT1G35720.1 | Symbols: ANNAT1, OXY5, ATOXY5 | annexin 1 | chr1:13225304-13226939 FORWARD LENGTH=317	AT1G35720.1	AT1G35720.1		44	44	44	89.6	89.6	89.6	36.203	0	323.31	82730000000	1156	28.5177	28.5583	28.5897	28.5759	29.7036	29.5878	29.3903	29.3338
3.27047	0.941482	AT3G12500.1 | Symbols: ATHCHIB, PR3, PR-3, CHI-B, B-CHI, HCHIB | basic chitinase | chr3:3962501-3963984 REVERSE LENGTH=335	AT3G12500.1	AT3G12500.1		13	13	13	60.9	60.9	60.9	36.183	0	89.643	569680000	90	22.3572	22.553	22.8283	22.6366	23.3454	23.8045	23.5691	23.422
3.55033	0.933812	AT4G15000.1 | Symbols: | Ribosomal L27e protein family | chr4:8571896-8572303 FORWARD LENGTH=135;AT4G15000.2 | Symbols: | Ribosomal L27e protein family | chr4:8571896-8572387 FORWARD LENGTH=131	AT4G15000.1;AT4G15000.2	AT4G15000.1;AT4G15000.2		12	12	7	52.6	52.6	39.3	15.607	0	255.56	10594000000	212	26.4556	26.5747	26.7057	26.2015	27.5272	27.4073	27.4899	27.2484
2.79362	0.927876	AT1G47200.1 | Symbols: WPP2 | WPP domain protein 2 | chr1:17298181-17298723 REVERSE LENGTH=180	AT1G47200.1	AT1G47200.1		11	11	8	67.8	67.8	63.9	19.134	0	202.89	5773400000	154	26.5298	25.9038	26.0623	26.3075	27.0889	26.8713	27.3502	27.2044
0.786959	0.925396	AT3G29200.1 | Symbols: CM1, ATCM1 | chorismate mutase 1 | chr3:11164582-11166258 REVERSE LENGTH=340	AT3G29200.1	AT3G29200.1		9	9	9	41.2	41.2	41.2	38.238	0	89.238	257230000	40	21.0189	20.836	21.0504	20.7488	22.4487	22.0948	20.1414	22.6707
0.485605	0.923829	AT4G38510.4 | Symbols: | ATPase, V1 complex, subunit B protein | chr4:18011155-18014789 REVERSE LENGTH=487;AT4G38510.3 | Symbols: | ATPase, V1 complex, subunit B protein | chr4:18011155-18014789 REVERSE LENGTH=487;AT4G38510.2 | Symbols: | ATPase, V1 com	AT4G38510.4;AT4G38510.3;AT4G38510.2;AT4G38510.1;AT4G38510.5	AT4G38510.4;AT4G38510.3;AT4G38510.2;AT4G38510.1;AT4G38510.5		37	8	8	81.3	21.8	21.8	54.304	0	81.456	366220000	38	20.9762	20.7704	21.2023	23.3295	20.6383	22.8244	23.4211	23.0899
4.602	0.923312	AT1G79210.3 | Symbols: | N-terminal nucleophile aminohydrolases (Ntn hydrolases) superfamily protein | chr1:29796286-29798240 REVERSE LENGTH=235;AT1G79210.2 | Symbols: | N-terminal nucleophile aminohydrolases (Ntn hydrolases) superfamily protein | chr1:2	AT1G79210.3;AT1G79210.2;AT1G79210.1	AT1G79210.3;AT1G79210.2;AT1G79210.1		17	17	4	78.7	78.7	20.4	25.733	0	323.31	12434000000	309	26.5075	26.46	26.4845	26.7585	27.5903	27.458	27.4458	27.4097
3.87448	0.922731	AT3G01520.1 | Symbols: | Adenine nucleotide alpha hydrolases-like superfamily protein | chr3:208506-209921 FORWARD LENGTH=175	AT3G01520.1	AT3G01520.1		11	11	9	60	60	53.7	19.568	0	63.425	823830000	78	23.2598	23.0942	23.2558	23.2595	24.4086	24.0875	23.935	24.1293
1.55848	0.921313	AT2G41800.1 | Symbols: | Protein of unknown function, DUF642 | chr2:17436671-17438005 REVERSE LENGTH=370	AT2G41800.1;AT2G41810.1	AT2G41800.1		11	11	11	45.1	45.1	45.1	40.37	0	64.276	634070000	87	23.413	22.7172	23.0079	22.3376	23.3034	24.3635	23.6281	23.8659
3.47789	0.918696	AT3G60750.1 | Symbols: | Transketolase | chr3:22454004-22456824 FORWARD LENGTH=741;AT3G60750.2 | Symbols: | Transketolase | chr3:22454004-22456824 FORWARD LENGTH=740	AT3G60750.1;AT3G60750.2	AT3G60750.1;AT3G60750.2		64	64	50	87.9	87.9	83.5	79.967	0	323.31	89043000000	1650	27.1685	27.3439	27.2793	27.718	28.2928	28.2018	28.2942	28.3957
4.28007	0.915106	AT5G49650.1 | Symbols: XK-2, XK2 | xylulose kinase-2 | chr5:20152898-20155574 FORWARD LENGTH=558;AT5G49650.2 | Symbols: XK-2, XK2 | xylulose kinase-2 | chr5:20152898-20155093 FORWARD LENGTH=426	AT5G49650.1;AT5G49650.2	AT5G49650.1;AT5G49650.2		30	30	30	60.4	60.4	60.4	61.294	0	189.17	3273300000	261	24.1598	23.9382	24.2028	24.0157	25.1825	24.9611	24.8792	24.9542
4.06458	0.910948	AT3G52990.1 | Symbols: | Pyruvate kinase family protein | chr3:19649046-19652237 FORWARD LENGTH=527;AT3G52990.2 | Symbols: | Pyruvate kinase family protein | chr3:19649336-19652237 FORWARD LENGTH=474	AT3G52990.1;AT3G52990.2	AT3G52990.1;AT3G52990.2		37	37	19	75.1	75.1	40.6	57.495	0	323.31	17543000000	561	26.5665	26.5644	26.3619	26.7234	27.4071	27.5001	27.3284	27.6244
3.07844	0.910514	AT2G21270.1 | Symbols: UFD1 | ubiquitin fusion degradation 1 | chr2:9108126-9110012 FORWARD LENGTH=319;AT2G21270.2 | Symbols: UFD1 | ubiquitin fusion degradation 1 | chr2:9108126-9110012 FORWARD LENGTH=319;AT2G21270.3 | Symbols: UFD1 | ubiquitin fusion deg	AT2G21270.1;AT2G21270.2;AT2G21270.3	AT2G21270.1;AT2G21270.2;AT2G21270.3		10	10	8	30.7	30.7	25.4	35.323	0	122.65	1872900000	94	23.7697	23.8553	24.3309	24.2032	24.9743	25.0702	24.9728	24.7839
2.38883	0.909661	AT1G12840.1 | Symbols: DET3, ATVHA-C | vacuolar ATP synthase subunit C (VATC) / V-ATPase C subunit / vacuolar proton pump C subunit (DET3) | chr1:4375584-4378220 FORWARD LENGTH=375	AT1G12840.1	AT1G12840.1		32	32	32	73.6	73.6	73.6	42.619	0	323.31	5488000000	401	25.0421	24.8493	24.5961	24.3384	25.2617	25.6339	25.8986	25.6703
1.37983	0.906283	AT3G18740.1 | Symbols: | Ribosomal protein L7Ae/L30e/S12e/Gadd45 family protein | chr3:6453437-6453870 FORWARD LENGTH=112;AT1G36240.1 | Symbols: | Ribosomal protein L7Ae/L30e/S12e/Gadd45 family protein | chr1:13614890-13616233 FORWARD LENGTH=112	AT3G18740.1;AT1G36240.1	AT3G18740.1;AT1G36240.1		12	12	8	71.4	71.4	59.8	12.279	0	142.39	2977800000	131	25.3546	25.4201	25.1182	23.9849	25.9715	26.0053	25.5568	25.9692
4.1696	0.905579	AT5G57330.1 | Symbols: | Galactose mutarotase-like superfamily protein | chr5:23218392-23220664 FORWARD LENGTH=312	AT5G57330.1	AT5G57330.1		22	22	22	72.4	72.4	72.4	35.447	0	251.87	2269200000	147	24.7071	24.8081	24.5377	24.6278	25.7423	25.6548	25.4481	25.4579
2.63258	0.903886	AT2G28000.1 | Symbols: CPN60A, CH-CPN60A, SLP | chaperonin-60alpha | chr2:11926603-11929184 FORWARD LENGTH=586	AT2G28000.1	AT2G28000.1		56	56	56	74.9	74.9	74.9	62.071	0	323.31	60827000000	1308	25.9278	26.1694	26.0886	26.6729	27.3335	27.0244	26.9817	27.1347
3.16913	0.889338	AT1G79500.4 | Symbols: AtkdsA1 | Aldolase-type TIM barrel family protein | chr1:29903604-29905989 FORWARD LENGTH=290;AT1G79500.3 | Symbols: AtkdsA1 | Aldolase-type TIM barrel family protein | chr1:29903604-29905989 FORWARD LENGTH=290;AT1G79500.2 | Symbols:	AT1G79500.4;AT1G79500.3;AT1G79500.2;AT1G79500.1;AT1G79500.5	AT1G79500.4;AT1G79500.3;AT1G79500.2;AT1G79500.1;AT1G79500.5		18	18	13	81.7	81.7	61.4	31.656	0	146.37	4813100000	240	25.7104	25.6321	25.2259	25.8077	26.5385	26.5789	26.3339	26.4821
0.725434	0.88891	AT1G44170.1 | Symbols: ALDH3H1, ALDH4 | aldehyde dehydrogenase 3H1 | chr1:16796564-16800031 REVERSE LENGTH=484;AT1G44170.2 | Symbols: ALDH3H1, ALDH4 | aldehyde dehydrogenase 3H1 | chr1:16796564-16800031 REVERSE LENGTH=484;AT1G44170.3 | Symbols: ALDH3H1, AL	AT1G44170.1;AT1G44170.2;AT1G44170.3	AT1G44170.1;AT1G44170.2;AT1G44170.3		12	12	12	35.3	35.3	35.3	53.158	0	86.779	692250000	86	20.8321	20.5461	20.9702	20.9917	20.8078	20.6115	22.595	22.8815
3.64303	0.885805	AT5G64370.1 | Symbols: BETA-UP, PYD3 | beta-ureidopropionase | chr5:25739264-25741031 FORWARD LENGTH=408	AT5G64370.1	AT5G64370.1		14	14	14	57.1	57.1	57.1	45.552	0	227	975450000	104	23.208	23.2536	23.0028	23.4969	24.084	24.188	24.007	24.2256
1.86921	0.879077	AT1G35160.1 | Symbols: GRF4, 14-3-3PHI, GF14 PHI | GF14 protein phi chain | chr1:12867264-12868514 FORWARD LENGTH=267;AT1G35160.2 | Symbols: GF14 PHI | GF14 protein phi chain | chr1:12867264-12868514 FORWARD LENGTH=295	AT1G35160.1;AT1G35160.2	AT1G35160.1;AT1G35160.2		28	22	16	92.9	80.1	61	30.194	0	323.31	17433000000	409	26.9512	26.9583	26.7424	26.4035	28.2728	27.5996	27.3171	27.3822
2.06652	0.872416	AT1G07990.1 | Symbols: | SIT4 phosphatase-associated family protein | chr1:2477413-2482898 FORWARD LENGTH=802	AT1G07990.1;AT2G28360.1	AT1G07990.1		9	9	9	19.1	19.1	19.1	89.588	0	27.335	173990000	40	21.0573	21.7858	20.9253	21.1498	22.2397	22.1586	22.2703	21.7393
3.36244	0.872367	AT2G44120.1 | Symbols: | Ribosomal protein L30/L7 family protein | chr2:18249227-18250402 REVERSE LENGTH=242;AT2G44120.2 | Symbols: | Ribosomal protein L30/L7 family protein | chr2:18249227-18250417 REVERSE LENGTH=247	AT2G44120.1;AT2G44120.2	AT2G44120.1;AT2G44120.2		30	12	7	81.4	48.8	33.9	27.939	0	323.31	7636700000	226	25.935	25.6108	25.6241	25.7131	26.8306	26.6217	26.5785	26.3416
4.06463	0.871825	AT5G24760.1 | Symbols: | GroES-like zinc-binding dehydrogenase family protein | chr5:8495035-8497245 REVERSE LENGTH=381;AT5G24760.3 | Symbols: | GroES-like zinc-binding dehydrogenase family protein | chr5:8495035-8497090 REVERSE LENGTH=352;AT5G24760.2 |	AT5G24760.1;AT5G24760.3;AT5G24760.2	AT5G24760.1;AT5G24760.3;AT5G24760.2		14	14	14	48	48	48	40.724	0	275.22	915300000	95	23.51	23.6754	23.4992	23.3264	24.351	24.383	24.529	24.2352
4.60047	0.870463	AT1G20225.1 | Symbols: | Thioredoxin superfamily protein | chr1:7007966-7009318 REVERSE LENGTH=233	AT1G20225.1	AT1G20225.1		8	8	8	47.6	47.6	47.6	26.052	0	167.78	30685000000	193	29.9441	29.9314	29.9521	29.7682	30.8241	30.6949	30.9138	30.6448
2.3241	0.870439	AT1G14320.1 | Symbols: SAC52, RPL10, RPL10A | Ribosomal protein L16p/L10e family protein | chr1:4888270-4889408 FORWARD LENGTH=220;AT1G14320.2 | Symbols: SAC52, RPL10A | Ribosomal protein L16p/L10e family protein | chr1:4888270-4889408 FORWARD LENGTH=163	AT1G14320.1;AT1G14320.2	AT1G14320.1;AT1G14320.2		18	5	3	60.5	21.4	14.5	24.917	0	29.599	2058600000	78	25.1428	24.8912	24.7192	25.2599	26.1999	25.9837	25.4497	25.8615
1.0029	0.867335	AT3G59380.1 | Symbols: FTA, PLP, ATFTA, PFT/PGGT-IALPHA | farnesyltransferase A | chr3:21944209-21945781 FORWARD LENGTH=326	AT3G59380.1	AT3G59380.1		12	12	12	70.9	70.9	70.9	37.984	0	98.235	439660000	69	22.3659	22.8	20.9931	22.8272	23.2866	23.2324	22.7895	23.147
3.44688	0.867235	AT2G05840.1 | Symbols: PAA2 | 20S proteasome subunit PAA2 | chr2:2234226-2236053 FORWARD LENGTH=246;AT2G05840.2 | Symbols: PAA2 | 20S proteasome subunit PAA2 | chr2:2234226-2235973 FORWARD LENGTH=220	AT2G05840.1;AT2G05840.2	AT2G05840.1;AT2G05840.2		20	20	10	85.4	85.4	57.3	27.35	0	227.64	5418700000	250	25.1856	25.2329	25.1906	25.519	26.3939	26.1628	26.0613	25.9789
2.16644	0.86666	AT4G26840.1 | Symbols: SUM1, SUMO 1, SUMO1, ATSUMO1 | small ubiquitin-like modifier 1 | chr4:13497466-13498458 FORWARD LENGTH=100	AT4G26840.1	AT4G26840.1		5	5	3	48	48	36	10.976	0	323.31	10015000000	124	27.1265	26.7389	26.3926	27.163	28.0038	27.6242	27.7893	27.4703
3.0763	0.859348	AT2G30930.1 | Symbols: | unknown protein;FUNCTIONS IN: molecular_function unknown;INVOLVED IN: biological_process unknown;LOCATED IN: chloroplast, plasma membrane, membrane;EXPRESSED IN: 24 plant structures;EXPRESSED DURING: 14 growth stages;BEST Ar	AT2G30930.1	AT2G30930.1		12	12	12	74.4	74.4	74.4	16.936	0	323.31	2355700000	168	23.944	23.9047	24.2733	23.9515	25.1688	24.6732	24.922	24.747
1.23502	0.85813	AT3G52390.1 | Symbols: | TatD related DNase | chr3:19423105-19425183 REVERSE LENGTH=320;AT3G52390.2 | Symbols: | TatD related DNase | chr3:19423105-19425183 REVERSE LENGTH=323	AT3G52390.1;AT3G52390.2	AT3G52390.1;AT3G52390.2		8	8	8	41.9	41.9	41.9	35.692	0	42.742	199320000	44	22.1968	21.8454	20.9147	20.7692	22.5296	22.3937	21.9952	22.2402
1.63288	0.85704	AT3G16080.1 | Symbols: | Zinc-binding ribosomal protein family protein | chr3:5454892-5455677 FORWARD LENGTH=95;AT1G52300.1 | Symbols: | Zinc-binding ribosomal protein family protein | chr1:19475213-19476152 REVERSE LENGTH=95	AT3G16080.1;AT1G52300.1	AT3G16080.1;AT1G52300.1		2	2	1	20	20	12.6	10.771	0	64.895	1736400000	50	25.2318	25.1307	25.1478	26.1891	26.3045	26.4087	26.4826	25.9317
1.3495	0.855904	AT3G02230.1 | Symbols: RGP1, ATRGP1 | reversibly glycosylated polypeptide 1 | chr3:415463-417304 FORWARD LENGTH=357	AT3G02230.1;AT3G08900.1	AT3G02230.1		42	18	18	96.9	58	58	40.629	0	323.31	16049000000	255	27.2643	27.4156	27.1346	27.2885	27.1328	28.4654	28.419	28.5094
4.0436	0.853872	AT1G43670.1 | Symbols: | Inositol monophosphatase family protein | chr1:16468184-16470347 FORWARD LENGTH=341	AT1G43670.1	AT1G43670.1		17	17	17	59.2	59.2	59.2	37.287	0	207.31	1940200000	171	24.0978	23.9148	24.0098	24.1612	25.1157	24.7847	24.8112	24.8875
2.85059	0.843014	AT3G09820.1 | Symbols: ADK1, ATADK1 | adenosine kinase 1 | chr3:3012122-3014624 FORWARD LENGTH=344;AT3G09820.2 | Symbols: ADK1 | adenosine kinase 1 | chr3:3012645-3014624 FORWARD LENGTH=302	AT3G09820.1;AT3G09820.2	AT3G09820.1;AT3G09820.2		31	31	15	67.4	67.4	51.7	37.836	0	323.31	29246000000	673	27.314	27.3442	26.9349	26.774	28.0207	27.9979	27.7793	27.9413
1.90446	0.838872	AT3G62250.1 | Symbols: UBQ5 | ubiquitin 5 | chr3:23037138-23037611 FORWARD LENGTH=157	AT3G62250.1	AT3G62250.1		19	10	3	71.3	36.3	19.1	17.797	0	136.58	6795500000	205	26.1648	26.0699	25.3027	25.7017	26.6835	26.9449	26.291	26.6752
3.47593	0.838381	AT3G09500.1 | Symbols: | Ribosomal L29 family protein | chr3:2917047-2917895 FORWARD LENGTH=123	AT3G09500.1	AT3G09500.1		13	6	2	69.1	26.8	14.6	14.285	0	153.28	1944200000	85	24.5757	24.4727	24.9397	24.7285	25.5718	25.5307	25.6037	25.3639
0.900691	0.837857	AT3G17300.1 | Symbols: | unknown protein;Has 48 Blast hits to 48 proteins in 21 species: Archae - 0;Bacteria - 0;Metazoa - 0;Fungi - 0;Plants - 40;Viruses - 0;Other Eukaryotes - 8 (source: NCBI BLink). | chr3:5907616-5908695 FORWARD LENGTH=91;AT3G1	AT3G17300.1;AT3G17300.2	AT3G17300.1;AT3G17300.2		6	6	6	69.2	69.2	69.2	10.431	0	128.93	1444600000	102	21.0303	20.9311	20.9374	20.8852	22.1951	20.3746	22.2908	22.2749
2.12757	0.833627	AT1G76550.1 | Symbols: | Phosphofructokinase family protein | chr1:28722900-28726929 REVERSE LENGTH=617	AT1G76550.1	AT1G76550.1		52	52	34	83.3	83.3	60.9	67.558	0	323.31	12488000000	561	25.6658	25.623	25.6164	25.0882	26.2767	26.5774	25.9016	26.5722
3.74414	0.830802	AT1G31340.1 | Symbols: RUB1, NEDD8, ATRUB1 | related to ubiquitin 1 | chr1:11218076-11219417 REVERSE LENGTH=156	AT1G31340.1;AT4G05050.4;AT5G03240.2;AT4G05320.4;AT4G05320.2;AT5G20620.1;AT4G05320.6;AT4G05320.3;AT4G05320.1;AT5G37640.1;AT1G65350.1;AT5G03240.1;AT5G03240.3;AT4G02890.3;AT4G05320.5;AT4G02890.4;AT1G55060.1;AT4G05050.1;AT4G05050.2;AT4G05050.3;AT4G02890.2;AT4G02890.1;AT3G09790.1	AT1G31340.1		20	20	3	75	75	16.7	17.397	0	323.31	14639000000	397	26.7634	26.5179	26.8244	26.7904	27.6025	27.7345	27.3912	27.4913
1.9561	0.829327	AT2G21330.1 | Symbols: FBA1 | fructose-bisphosphate aldolase 1 | chr2:9128416-9130152 REVERSE LENGTH=399;AT2G21330.3 | Symbols: FBA1 | fructose-bisphosphate aldolase 1 | chr2:9128416-9130152 REVERSE LENGTH=389;AT2G21330.2 | Symbols: FBA1 | fructose-bisphos	AT2G21330.1;AT2G21330.3;AT2G21330.2	AT2G21330.1;AT2G21330.3;AT2G21330.2		19	16	11	47.6	44.9	34.8	42.93	0	323.31	4726300000	305	23.2097	23.6839	23.5071	23.7489	24.1704	24.5913	23.9253	24.7799
3.84922	0.822541	AT5G21060.1 | Symbols: | Glyceraldehyde-3-phosphate dehydrogenase-like family protein | chr5:7149153-7152745 REVERSE LENGTH=376	AT5G21060.1	AT5G21060.1		21	21	1	66.2	66.2	2.1	40.413	0	323.31	3875500000	204	25.2549	25.354	25.1537	25.5759	26.235	26.1666	26.0703	26.1567
1.50794	0.822044	AT5G21105.1 | Symbols: | Plant L-ascorbate oxidase | chr5:7172727-7177409 FORWARD LENGTH=588;AT5G21105.3 | Symbols: | Plant L-ascorbate oxidase | chr5:7172727-7177657 FORWARD LENGTH=543;AT5G21105.2 | Symbols: | Plant L-ascorbate oxidase | chr5:7174321-7	AT5G21105.1;AT5G21105.3;AT5G21105.2;AT5G21100.1	AT5G21105.1;AT5G21105.3;AT5G21105.2		31	31	31	50.3	50.3	50.3	65.838	0	323.31	10586000000	479	25.8377	26.0942	26.1084	24.9271	26.4485	26.7811	26.3808	26.6453
4.22316	0.819926	AT2G16780.1 | Symbols: MSI2, MSI02, NFC02, NFC2 | Transducin family protein / WD-40 repeat family protein | chr2:7281615-7283583 REVERSE LENGTH=415	AT2G16780.1	AT2G16780.1		20	20	17	61.4	61.4	54.5	46.703	0	323.31	2766700000	159	24.044	24.1477	23.9588	24.3136	25.0198	24.9263	24.8691	24.9287
2.40161	0.818811	AT5G40370.1 | Symbols: | Glutaredoxin family protein | chr5:16147826-16149052 REVERSE LENGTH=111;AT5G40370.2 | Symbols: | Glutaredoxin family protein | chr5:16147826-16148900 REVERSE LENGTH=136	AT5G40370.1;AT5G40370.2	AT5G40370.1;AT5G40370.2		12	12	12	90.1	90.1	90.1	11.756	0	323.31	8287600000	280	25.804	25.4451	25.7464	26.0157	26.9652	26.5257	26.3356	26.4598
4.35636	0.817052	AT1G12310.1 | Symbols: | Calcium-binding EF-hand family protein | chr1:4187500-4187946 REVERSE LENGTH=148	AT1G12310.1	AT1G12310.1		19	8	8	96.6	61.5	61.5	16.517	0	220.33	3102900000	111	25.2537	25.1458	25.3454	25.4658	26.1978	26.1479	26.0175	26.1157
2.85162	0.815784	AT1G18540.1 | Symbols: | Ribosomal protein L6 family protein | chr1:6377448-6378548 REVERSE LENGTH=233	AT1G18540.1	AT1G18540.1		19	8	8	60.1	38.2	38.2	26.152	0	42.715	2417000000	97	24.9593	25.0152	24.7993	24.8737	26.072	25.571	25.8192	25.4484
1.03048	0.80945	AT1G13440.1 | Symbols: GAPC-2, GAPC2 | glyceraldehyde-3-phosphate dehydrogenase C2 | chr1:4608465-4610494 REVERSE LENGTH=338;AT1G13440.2 | Symbols: GAPC-2, GAPC2 | glyceraldehyde-3-phosphate dehydrogenase C2 | chr1:4608465-4610494 REVERSE LENGTH=310	AT1G13440.1;AT1G13440.2	AT1G13440.1;AT1G13440.2		46	10	10	88.8	39.1	39.1	36.913	0	323.31	15612000000	195	27.1503	27.6223	27.4425	27.3719	28.6865	28.4934	28.6148	27.03
0.501312	0.805306	AT5G04740.1 | Symbols: | ACT domain-containing protein | chr5:1368713-1371391 REVERSE LENGTH=301;AT5G04740.2 | Symbols: | ACT domain-containing protein | chr5:1368713-1371391 REVERSE LENGTH=200	AT5G04740.1;AT5G04740.2	AT5G04740.1;AT5G04740.2		19	19	19	58.1	58.1	58.1	33.242	0	205.48	2459700000	176	20.9549	22.5214	21.1892	21.0489	22.8414	22.6889	20.3383	23.067
1.25372	0.805223	AT3G54440.1 | Symbols: | glycoside hydrolase family 2 protein | chr3:20148494-20157019 REVERSE LENGTH=1107;AT3G54440.2 | Symbols: | glycoside hydrolase family 2 protein | chr3:20148494-20157019 REVERSE LENGTH=1108;AT3G54440.3 | Symbols: | glycoside hydr	AT3G54440.1;AT3G54440.2;AT3G54440.3	AT3G54440.1;AT3G54440.2;AT3G54440.3		18	18	18	22.2	22.2	22.2	125.41	0	147.54	362740000	52	20.9462	22.0335	22.1824	20.9887	22.1155	22.4628	22.4421	22.3512
2.80004	0.791807	AT3G62870.1 | Symbols: | Ribosomal protein L7Ae/L30e/S12e/Gadd45 family protein | chr3:23242862-23244273 REVERSE LENGTH=256	AT3G62870.1	AT3G62870.1		23	4	4	63.7	18.8	18.8	29.034	0	64.109	2034300000	57	24.5368	24.6205	24.851	24.6268	25.7841	25.4593	25.3998	25.1592
2.47292	0.787405	AT5G03850.1 | Symbols: | Nucleic acid-binding, OB-fold-like protein | chr5:1028542-1028736 REVERSE LENGTH=64;AT3G10090.1 | Symbols: | Nucleic acid-binding, OB-fold-like protein | chr3:3108960-3109154 REVERSE LENGTH=64	AT5G03850.1;AT3G10090.1	AT5G03850.1;AT3G10090.1		10	10	8	79.7	79.7	54.7	7.3705	0	272.56	4641400000	192	25.8433	25.798	25.5443	25.1783	26.4691	26.5105	26.3339	26.2
3.0307	0.784251	AT2G17420.1 | Symbols: NTRA, ATNTRA, NTR2 | NADPH-dependent thioredoxin reductase A | chr2:7564357-7566219 FORWARD LENGTH=378	AT2G17420.1	AT2G17420.1		29	29	20	65.6	65.6	56.1	40.014	0	323.31	20060000000	598	26.5918	26.6274	26.3612	26.4272	27.5447	27.3957	27.0453	27.1588
4.00178	0.782302	AT3G07110.1 | Symbols: | Ribosomal protein L13 family protein | chr3:2252092-2253332 FORWARD LENGTH=206;AT3G07110.2 | Symbols: | Ribosomal protein L13 family protein | chr3:2252092-2253332 FORWARD LENGTH=207	AT3G07110.1;AT3G07110.2	AT3G07110.1;AT3G07110.2		19	12	11	62.6	40.3	40.3	23.466	0	165.14	4979700000	173	25.5951	25.6202	25.5446	25.4134	26.2827	26.2377	26.5415	26.2406
3.63806	0.780366	AT2G39020.1 | Symbols: | Acyl-CoA N-acyltransferases (NAT) superfamily protein | chr2:16295392-16296102 FORWARD LENGTH=236	AT2G39020.1;AT2G39030.1	AT2G39020.1		10	10	10	48.7	48.7	48.7	26.44	0	66.847	2182200000	81	24.8678	24.7807	24.8292	25.0998	25.8201	25.7609	25.6032	25.5148
3.11236	0.779557	AT1G04410.1 | Symbols: | Lactate/malate dehydrogenase family protein | chr1:1189418-1191267 REVERSE LENGTH=332	AT1G04410.1	AT1G04410.1		26	26	16	75.3	75.3	56.3	35.571	0	323.31	54369000000	690	28.0743	28.0636	27.9037	27.7693	28.4462	28.7421	28.9087	28.8322
4.30001	0.777382	AT3G55440.1 | Symbols: ATCTIMC, TPI, CYTOTPI | triosephosphate isomerase | chr3:20553794-20556078 FORWARD LENGTH=254	AT3G55440.1	AT3G55440.1		33	33	32	97.6	97.6	97.6	27.169	0	323.31	278680000000	1323	30.5476	30.6398	30.5921	30.5804	31.1667	31.3947	31.5193	31.3886
3.86761	0.77579	AT1G15060.1 | Symbols: | Uncharacterised conserved protein UCP031088, alpha/beta hydrolase | chr1:5184053-5186856 REVERSE LENGTH=578	AT1G15060.1	AT1G15060.1		23	23	23	51	51	51	63.674	0	323.31	8199600000	400	23.9917	24.0464	23.7965	23.9814	24.6317	24.6164	24.7427	24.9283
0.551593	0.76877	AT2G17130.1 | Symbols: IDH2, IDH-II | isocitrate dehydrogenase subunit 2 | chr2:7461062-7462466 REVERSE LENGTH=367;AT2G17130.2 | Symbols: IDH2, IDH-II | isocitrate dehydrogenase subunit 2 | chr2:7461062-7462466 REVERSE LENGTH=363	AT2G17130.1;AT2G17130.2	AT2G17130.1;AT2G17130.2		23	10	10	47.1	29.7	29.7	39.59	0	184.74	2384700000	151	21.0192	20.6769	20.8422	20.8288	20.6111	20.5098	22.1241	23.1971
0.593233	0.765683	AT3G02560.2 | Symbols: | Ribosomal protein S7e family protein | chr3:542341-543168 FORWARD LENGTH=191;AT3G02560.1 | Symbols: | Ribosomal protein S7e family protein | chr3:542341-543168 FORWARD LENGTH=191	AT3G02560.2;AT3G02560.1	AT3G02560.2;AT3G02560.1		22	17	17	72.8	63.4	63.4	22.196	0	91.842	858810000	83	23.7775	23.6205	21.3236	23.7805	23.9105	23.8926	24.1033	23.6584
1.70406	0.764598	AT1G77710.1 | Symbols: | CONTAINS InterPro DOMAIN/s: Ubiquitin-like, Ufm1 (InterPro:IPR005375);Has 244 Blast hits to 244 proteins in 106 species: Archae - 0;Bacteria - 0;Metazoa - 149;Fungi - 0;Plants - 47;Viruses - 0;Other Eukaryotes - 48 (source:	AT1G77710.1	AT1G77710.1		6	6	6	71	71	71	9.9284	0	27.127	1648800000	129	24.7239	24.5513	24.2415	23.7821	25.2085	25.0485	25.3459	24.7541
2.89342	0.762807	AT3G23490.1 | Symbols: CYN | cyanase | chr3:8423238-8424415 REVERSE LENGTH=168	AT3G23490.1	AT3G23490.1		16	16	16	91.7	91.7	91.7	18.592	0	323.31	3043100000	215	24.9433	24.8633	24.4887	24.9604	25.5725	25.4331	25.7888	25.5125
3.61241	0.76188	AT5G55160.1 | Symbols: SUM2, SUMO 2, SUMO2, ATSUMO2 | small ubiquitin-like modifier 2 | chr5:22383747-22384772 REVERSE LENGTH=103;AT5G55160.2 | Symbols: SUM2, SUMO 2, SUMO2, ATSUMO2 | small ubiquitin-like modifier 2 | chr5:22383747-22384772 REVERSE LENGTH=	AT5G55160.1;AT5G55160.2	AT5G55160.1;AT5G55160.2		5	3	3	45.6	34	34	11.654	0	203.5	6804500000	73	27.022	26.8316	26.7643	26.8137	27.5533	27.55	27.8602	27.5157
0.861389	0.753598	AT3G48140.1 | Symbols: | B12D protein | chr3:17778471-17779299 FORWARD LENGTH=88	AT3G48140.1	AT3G48140.1		5	5	5	54.5	54.5	54.5	10.019	0	168.5	3303500000	75	20.8904	20.7611	20.7593	20.9282	20.3436	21.6125	22.2496	22.1478
0.977411	0.752649	AT3G07750.2 | Symbols: | 3-5-exoribonuclease family protein | chr3:2473486-2475218 FORWARD LENGTH=286;AT3G07750.1 | Symbols: | 3-5-exoribonuclease family protein | chr3:2473486-2475218 FORWARD LENGTH=286	AT3G07750.2;AT3G07750.1	AT3G07750.2;AT3G07750.1		8	8	8	39.9	39.9	39.9	29.962	0	44.316	215170000	50	21.0459	22.3937	22.4537	21.0987	22.4755	22.4576	22.3978	22.6716
3.18168	0.751451	AT4G18100.1 | Symbols: | Ribosomal protein L32e | chr4:10035715-10036475 REVERSE LENGTH=133	AT4G18100.1	AT4G18100.1		17	17	6	71.4	71.4	37.6	15.503	0	323.31	11212000000	266	26.2103	26.0542	26.4083	26.4589	27.1379	27.0572	27.1115	26.8309
0.700781	0.749037	AT4G22310.1 | Symbols: | Uncharacterised protein family (UPF0041) | chr4:11791443-11792638 FORWARD LENGTH=108	AT4G22310.1	AT4G22310.1		6	6	5	48.1	48.1	38.9	12.005	0	149.75	2612400000	95	20.85	20.6489	21.2724	20.8477	20.1582	21.9806	22.2587	22.2176
2.72842	0.745458	AT3G01390.2 | Symbols: VMA10, AVMA10 | vacuolar membrane ATPase 10 | chr3:150265-150922 REVERSE LENGTH=110;AT3G01390.1 | Symbols: VMA10, AVMA10 | vacuolar membrane ATPase 10 | chr3:150265-150922 REVERSE LENGTH=110	AT3G01390.2;AT3G01390.1	AT3G01390.2;AT3G01390.1		7	7	7	66.4	66.4	66.4	12.397	0	323.31	4635500000	132	25.6696	25.2442	25.5818	25.6483	26.2337	26.3155	26.5313	26.0452
1.06005	0.742949	AT1G80230.1 | Symbols: | Rubredoxin-like superfamily protein | chr1:30169784-30170999 REVERSE LENGTH=171	AT1G80230.1	AT1G80230.1		11	11	8	58.5	58.5	45.6	18.583	0	301.21	8576300000	189	20.7848	20.7999	21.0626	20.9602	22.5136	21.109	21.0112	21.9454
3.25076	0.7387	AT1G26570.1 | Symbols: UGD1, ATUGD1 | UDP-glucose dehydrogenase 1 | chr1:9182801-9184246 FORWARD LENGTH=481	AT1G26570.1	AT1G26570.1		21	14	14	58	46.8	46.8	52.971	0	196.56	967230000	107	23.3461	23.2862	22.9898	22.9887	23.9008	23.9504	23.7272	23.9872
0.695063	0.738428	AT4G02340.1 | Symbols: | alpha/beta-Hydrolases superfamily protein | chr4:1035722-1037403 FORWARD LENGTH=324	AT4G02340.1	AT4G02340.1		12	12	12	47.5	47.5	47.5	36.656	0	74.339	483780000	70	22.5447	23.0384	21.1285	21.0026	22.8957	22.5219	22.6362	22.6141
0.998281	0.736598	AT2G42590.1 | Symbols: GRF9, GF14 MU | general regulatory factor 9 | chr2:17732118-17733775 REVERSE LENGTH=263;AT2G42590.3 | Symbols: GRF9, GF14 MU | general regulatory factor 9 | chr2:17732164-17733775 REVERSE LENGTH=276;AT2G42590.2 | Symbols: GRF9, GF14	AT2G42590.1;AT2G42590.3;AT2G42590.2	AT2G42590.1;AT2G42590.3;AT2G42590.2		14	13	12	54.4	50.6	50.6	29.52	0	103.75	3329300000	171	25.6838	25.9802	25.1567	24.8444	26.6638	26.4481	26.1185	25.3809
1.01385	0.733801	AT2G27040.2 | Symbols: AGO4 | Argonaute family protein | chr2:11536795-11541503 REVERSE LENGTH=924;AT2G27040.1 | Symbols: AGO4, OCP11 | Argonaute family protein | chr2:11536795-11541503 REVERSE LENGTH=924	AT2G27040.2;AT2G27040.1	AT2G27040.2;AT2G27040.1		30	30	30	46.2	46.2	46.2	102.84	0	184.13	1444300000	164	23.4153	23.2511	21.8617	22.5614	23.6843	23.7197	23.2884	23.3322
2.20835	0.730792	AT3G49470.1 | Symbols: NACA2 | nascent polypeptide-associated complex subunit alpha-like protein 2 | chr3:18341072-18342273 FORWARD LENGTH=217	AT3G49470.1	AT3G49470.1		12	12	11	75.1	75.1	69.1	23.712	0	253.94	1507400000	133	23.6852	23.5728	23.3669	23.4521	23.7747	24.5166	24.3558	24.353
2.60979	0.730508	AT4G19710.2 | Symbols: AK-HSDH II, AK-HSDH | aspartate kinase-homoserine dehydrogenase ii | chr4:10725229-10729536 FORWARD LENGTH=916;AT4G19710.1 | Symbols: AK-HSDH II, AK-HSDH | aspartate kinase-homoserine dehydrogenase ii | chr4:10725229-10729278 FORWARD	AT4G19710.2;AT4G19710.1	AT4G19710.2;AT4G19710.1		21	15	15	37.9	28.7	28.7	100.25	0	48.694	266640000	54	20.8901	20.8811	21.1641	21.0411	21.9343	21.3461	21.8024	21.8157
2.41765	0.728727	AT5G16050.1 | Symbols: GRF5, GF14 UPSILON | general regulatory factor 5 | chr5:5244008-5245402 REVERSE LENGTH=268	AT5G16050.1	AT5G16050.1		31	31	15	84	84	50.4	30.182	0	323.31	44523000000	534	29.0543	29.0213	29.0376	29.0064	30.1312	29.909	29.4424	29.5518
3.93811	0.724852	AT1G17880.1 | Symbols: BTF3, ATBTF3 | basic transcription factor 3 | chr1:6152572-6153425 REVERSE LENGTH=165	AT1G17880.1	AT1G17880.1		7	7	7	42.4	42.4	42.4	17.946	0	211.13	2568500000	160	25.0104	24.9157	24.942	25.0351	25.69	25.4874	25.8014	25.8238
2.88408	0.721275	AT2G34480.1 | Symbols: | Ribosomal protein L18ae/LX family protein | chr2:14532916-14534161 REVERSE LENGTH=178	AT2G34480.1	AT2G34480.1		25	25	13	73.6	73.6	41	21.307	0	323.31	11813000000	347	26.2164	25.9359	26.4369	26.2848	26.953	27.1244	26.9079	26.7737
0.602564	0.720352	AT5G61030.1 | Symbols: GR-RBP3 | glycine-rich RNA-binding protein 3 | chr5:24560870-24562152 FORWARD LENGTH=309	AT5G61030.1	AT5G61030.1		13	13	13	32	32	32	29.984	0	323.31	7687700000	226	20.7413	20.5263	21.1451	20.7152	20.8761	20.3274	22.7471	22.0588
1.793	0.72004	AT5G51700.1 | Symbols: PBS2, ATRAR1, RPR2, RAR1 | protein binding;zinc ion binding | chr5:21001373-21003143 REVERSE LENGTH=226	AT5G51700.1	AT5G51700.1		11	11	11	60.2	60.2	60.2	24.961	0	212.23	2149800000	155	24.6903	24.4816	23.9809	24.2527	25.3907	25.1875	24.6573	25.0503
1.97003	0.717347	AT1G74050.1 | Symbols: | Ribosomal protein L6 family protein | chr1:27847256-27848680 REVERSE LENGTH=233;AT1G74060.1 | Symbols: | Ribosomal protein L6 family protein | chr1:27850033-27851299 REVERSE LENGTH=233	AT1G74050.1;AT1G74060.1	AT1G74050.1;AT1G74060.1		23	23	12	62.2	62.2	40.3	26.106	0	272.72	8518200000	200	26.3279	25.9975	25.6925	25.8919	27.1236	26.5727	26.597	26.4858
1.54712	0.717111	AT2G03800.1 | Symbols: GEK1 | D-aminoacyl-tRNA deacylases | chr2:1156782-1158695 FORWARD LENGTH=317	AT2G03800.1	AT2G03800.1		19	19	19	65.6	65.6	65.6	34.731	0	323.31	7217000000	300	25.571	25.768	25.4014	25.7959	25.6649	26.5097	26.6885	26.5417
2.22506	0.710614	AT5G38480.1 | Symbols: GRF3, RCI1 | general regulatory factor 3 | chr5:15410277-15411285 FORWARD LENGTH=255;AT5G38480.2 | Symbols: GRF3, RCI1 | general regulatory factor 3 | chr5:15410277-15411285 FORWARD LENGTH=254	AT5G38480.1;AT5G38480.2	AT5G38480.1;AT5G38480.2		23	13	13	92.2	69.8	69.8	28.606	0	323.31	16764000000	267	27.1926	27.2837	27.2839	27.1846	28.3088	28.1302	27.5557	27.7926
2.52128	0.707191	AT5G49510.2 | Symbols: PFD3 | prefoldin 3 | chr5:20080729-20082456 FORWARD LENGTH=195;AT5G49510.1 | Symbols: PFD3 | prefoldin 3 | chr5:20080729-20082456 FORWARD LENGTH=195	AT5G49510.2;AT5G49510.1	AT5G49510.2;AT5G49510.1		10	10	10	59	59	59	21.465	0	163.77	1248700000	90	23.8342	24.2992	23.9869	24.4483	24.8985	24.8181	24.9404	24.7404
2.79277	0.706564	AT5G08570.1 | Symbols: | Pyruvate kinase family protein | chr5:2778433-2780300 FORWARD LENGTH=510	AT5G08570.1;AT3G25960.1;AT3G04050.1;AT3G55650.1	AT5G08570.1		26	7	7	65.5	30	30	54.976	0	244.85	1345900000	84	23.7159	23.7499	23.8962	24.0759	24.3329	24.4638	24.7569	24.7104
2.22111	0.698158	AT5G35590.1 | Symbols: PAA1 | proteasome alpha subunit A1 | chr5:13765417-13767768 REVERSE LENGTH=246	AT5G35590.1	AT5G35590.1		19	9	9	87.4	59.3	59.3	27.294	0	253.21	6912800000	171	26.2111	26.2338	25.966	26.4747	26.5475	26.9207	27.1421	27.0678
1.79285	0.697209	AT1G43890.3 | Symbols: ATRAB18, ATRABC1, RAB18-1, RABC1, ATRAB-C1, RAB18 | RAB GTPASE HOMOLOG B18 | chr1:16646934-16648395 FORWARD LENGTH=212;AT1G43890.2 | Symbols: ATRAB18, ATRABC1, RAB18-1, RABC1, ATRAB-C1, RAB18 | RAB GTPASE HOMOLOG B18 | chr1:16646934-	AT1G43890.3;AT1G43890.2;AT1G43890.1	AT1G43890.3;AT1G43890.2;AT1G43890.1		17	17	16	78.3	78.3	74.5	23.53	0	190.47	2971200000	243	24.0107	23.8496	24.0642	23.9072	24.9977	24.7328	24.0637	24.8264
2.02857	0.69659	AT1G13060.1 | Symbols: PBE1 | 20S proteasome beta subunit E1 | chr1:4452641-4454663 FORWARD LENGTH=274;AT1G13060.2 | Symbols: PBE1 | 20S proteasome beta subunit E1 | chr1:4452641-4454663 FORWARD LENGTH=298	AT1G13060.1;AT1G13060.2	AT1G13060.1;AT1G13060.2		15	15	6	75.2	75.2	44.2	29.667	0	323.31	6529100000	189	25.11	25.3261	25.7105	25.7616	26.2497	26.0203	26.4196	26.0051
3.87679	0.689025	AT5G17000.1 | Symbols: | Zinc-binding dehydrogenase family protein | chr5:5584983-5586991 REVERSE LENGTH=345	AT5G17000.1	AT5G17000.1		26	22	18	90.1	78.8	65.2	38.115	0	216.6	4751100000	270	25.1118	25.3008	25.1914	25.2846	25.7258	26.0421	25.9283	25.9485
1.85623	0.684272	AT3G10610.1 | Symbols: | Ribosomal S17 family protein | chr3:3319459-3319881 FORWARD LENGTH=140	AT3G10610.1	AT3G10610.1		13	13	2	80	80	40.7	16.036	0	205.25	10345000000	219	26.5162	26.1745	26.8327	26.925	27.1843	27.5205	27.4143	27.0664
1.24601	0.682539	AT1G18080.1 | Symbols: ATARCA, RACK1A_AT, RACK1A | Transducin/WD40 repeat-like superfamily protein | chr1:6222325-6223901 FORWARD LENGTH=327	AT1G18080.1	AT1G18080.1		37	37	31	84.1	84.1	81	35.747	0	323.31	16524000000	516	27.0127	26.844	26.0679	26.0031	26.897	27.4317	27.3266	27.0025
3.13758	0.680247	AT5G13520.1 | Symbols: | peptidase M1 family protein | chr5:4342117-4344571 REVERSE LENGTH=616	AT5G13520.1	AT5G13520.1		33	33	33	58.8	58.8	58.8	69.265	0	323.31	7357400000	409	25.5748	25.7328	25.4649	25.2492	26.2851	26.1369	26.1346	26.1861
2.09701	0.680118	AT5G23290.1 | Symbols: PFD5 | prefoldin 5 | chr5:7846144-7847428 FORWARD LENGTH=151	AT5G23290.1	AT5G23290.1		10	10	10	74.2	74.2	74.2	16.41	0	277.61	2175000000	118	24.6917	24.6519	24.7331	25.351	25.611	25.4992	25.6392	25.3987
1.38676	0.678506	AT3G43190.1 | Symbols: SUS4, ATSUS4 | sucrose synthase 4 | chr3:15179204-15182577 REVERSE LENGTH=808	AT3G43190.1;AT4G02280.1;AT5G49190.1	AT3G43190.1		57	45	45	54.8	46.9	46.9	93.002	0	323.31	8736700000	492	24.8038	25.2399	25.602	25.3694	25.3728	26.2442	25.9089	26.2031
0.824629	0.675536	AT3G02540.1 | Symbols: RAD23-3, RAD23C | Rad23 UV excision repair protein family | chr3:533095-536151 REVERSE LENGTH=419;AT3G02540.3 | Symbols: RAD23C | Rad23 UV excision repair protein family | chr3:533095-536151 REVERSE LENGTH=418;AT3G02540.2 | Symbols:	AT3G02540.1;AT3G02540.3;AT3G02540.2	AT3G02540.1;AT3G02540.3;AT3G02540.2		6	5	5	28.6	26.5	26.5	44.246	0	46.661	300480000	37	23.1067	22.8416	22.9339	21.4009	23.5406	23.0726	23.2929	23.0791
1.6672	0.671416	AT4G34200.1 | Symbols: EDA9 | D-3-phosphoglycerate dehydrogenase | chr4:16374041-16376561 REVERSE LENGTH=603	AT4G34200.1;AT3G19480.1	AT4G34200.1		34	34	32	57.4	57.4	55.6	63.324	0	323.31	32415000000	830	25.4521	25.7285	25.5665	26.1185	26.1098	26.1054	26.6694	26.6667
0.7697	0.664587	AT5G24650.1 | Symbols: | Mitochondrial import inner membrane translocase subunit Tim17/Tim22/Tim23 family protein | chr5:8437123-8438859 FORWARD LENGTH=259	AT5G24650.1	AT5G24650.1		13	13	12	51	51	47.9	27.772	0	307.33	2019800000	150	20.9326	20.5352	21.2905	20.8676	20.4357	21.7838	22.2897	21.7751
1.01013	0.663769	AT2G43710.2 | Symbols: SSI2, FAB2 | Plant stearoyl-acyl-carrier-protein desaturase family protein | chr2:18120107-18122495 FORWARD LENGTH=401;AT2G43710.1 | Symbols: SSI2, FAB2 | Plant stearoyl-acyl-carrier-protein desaturase family protein | chr2:18120107-	AT2G43710.2;AT2G43710.1;AT3G02620.1;AT3G02610.1	AT2G43710.2;AT2G43710.1		27	27	21	58.6	58.6	46.1	45.65	0	323.31	4377600000	329	23.1269	23.4266	23.1794	23.8313	23.1789	24.1785	24.4074	24.4545
1.89843	0.663579	AT5G61510.1 | Symbols: | GroES-like zinc-binding alcohol dehydrogenase family protein | chr5:24737084-24738975 REVERSE LENGTH=406	AT5G61510.1	AT5G61510.1		17	17	17	61.8	61.8	61.8	44.022	0	204.89	1537300000	110	24.1504	24.0492	24.4878	24.5729	24.5971	25.0748	25.2604	24.9824
4.48635	0.66241	AT3G13235.3 | Symbols: | ubiquitin family protein | chr3:4271492-4274348 REVERSE LENGTH=413;AT3G13235.2 | Symbols: | ubiquitin family protein | chr3:4271492-4274348 REVERSE LENGTH=414;AT3G13235.1 | Symbols: | ubiquitin family protein | chr3:4271492-4274	AT3G13235.3;AT3G13235.2;AT3G13235.1	AT3G13235.3;AT3G13235.2;AT3G13235.1		18	18	18	56.2	56.2	56.2	45.272	0	272.28	2547200000	204	24.1036	23.975	24.077	24.0852	24.6757	24.7303	24.8647	24.6197
3.28562	0.657003	AT1G33120.1 | Symbols: | Ribosomal protein L6 family | chr1:12010986-12012223 FORWARD LENGTH=194;AT1G33140.1 | Symbols: PGY2 | Ribosomal protein L6 family | chr1:12023360-12024502 FORWARD LENGTH=194	AT1G33120.1;AT1G33140.1;AT4G10450.1	AT1G33120.1;AT1G33140.1		30	30	30	80.4	80.4	80.4	22.017	0	323.31	27331000000	737	26.8904	26.5225	26.6796	26.9006	27.4683	27.3588	27.4622	27.3318
1.62821	0.656582	AT1G11910.1 | Symbols: APA1, ATAPA1 | aspartic proteinase A1 | chr1:4017119-4019874 REVERSE LENGTH=506	AT1G11910.1;AT1G62290.2;AT1G62290.1	AT1G11910.1		22	22	22	60.9	60.9	60.9	54.613	0	278.38	2811200000	224	24.3815	24.3853	24.0103	23.6577	24.4963	24.6317	25.0964	24.8369
1.60093	0.652616	AT3G52580.1 | Symbols: | Ribosomal protein S11 family protein | chr3:19503324-19504701 FORWARD LENGTH=150	AT3G52580.1	AT3G52580.1		15	5	5	80	40.7	40.7	16.238	0	146.96	1371600000	70	24.7926	24.5766	24.8035	24.3481	24.935	25.541	25.6813	24.9739
1.57606	0.648894	AT1G29880.1 | Symbols: | glycyl-tRNA synthetase / glycine--tRNA ligase | chr1:10459662-10462781 REVERSE LENGTH=729	AT1G29880.1;AT3G44740.1	AT1G29880.1		45	45	44	62.3	62.3	62.3	81.943	0	323.31	6989800000	510	25.5661	25.6311	25.3934	24.8756	25.5967	26.1098	26.1385	26.2168
1.86516	0.645391	AT1G78300.1 | Symbols: GRF2, 14-3-3OMEGA, GF14 OMEGA | general regulatory factor 2 | chr1:29461883-29463052 FORWARD LENGTH=259	AT1G78300.1	AT1G78300.1		27	17	17	95	69.1	69.1	29.161	0	323.31	10529000000	271	26.2987	26.2539	26.3012	26.2532	27.3078	27.0016	26.4115	26.9676
1.29306	0.645366	AT2G29450.1 | Symbols: ATGSTU5, ATGSTU1, AT103-1A, GSTU5 | glutathione S-transferase tau 5 | chr2:12624774-12625566 REVERSE LENGTH=224	AT2G29450.1	AT2G29450.1		15	15	14	64.7	64.7	64.7	26	0	164.76	2215800000	176	24.3766	24.5737	24.3879	23.7848	24.3342	25.1217	25.2344	25.0142
2.20709	0.642538	AT4G29510.1 | Symbols: ATPRMT11, PRMT11, ATPRMT1B, PRMT1B | arginine methyltransferase 11 | chr4:14491739-14493752 FORWARD LENGTH=390	AT4G29510.1	AT4G29510.1		14	14	13	47.4	47.4	42.8	43.893	0	139.45	1305900000	134	24.0537	24.0977	23.8324	24.4658	25.0063	24.6882	24.6569	24.6684
2.7936	0.638779	AT1G74920.1 | Symbols: ALDH10A8 | aldehyde dehydrogenase 10A8 | chr1:28139175-28142573 REVERSE LENGTH=501;AT1G74920.2 | Symbols: ALDH10A8 | aldehyde dehydrogenase 10A8 | chr1:28139175-28142573 REVERSE LENGTH=496	AT1G74920.1;AT1G74920.2	AT1G74920.1;AT1G74920.2		27	27	27	64.1	64.1	64.1	54.431	0	323.31	4410600000	301	24.539	24.6975	24.2169	24.4615	24.9359	25.1551	25.2069	25.172
0.842239	0.637569	AT1G23100.1 | Symbols: | GroES-like family protein | chr1:8195867-8196336 FORWARD LENGTH=97	AT1G23100.1	AT1G23100.1		13	13	13	91.8	91.8	91.8	10.546	0	114.31	2408100000	98	20.7288	20.8124	20.9311	21.0134	21.2251	20.6732	21.6992	22.4384
4.12903	0.630927	AT1G12000.1 | Symbols: | Phosphofructokinase family protein | chr1:4050159-4053727 REVERSE LENGTH=566	AT1G12000.1	AT1G12000.1		42	42	33	82.5	82.5	73.9	61.459	0	323.31	15073000000	708	26.0258	26.0822	25.8904	26.1132	26.5332	26.7182	26.7195	26.6645
2.77171	0.628351	AT5G16450.2 | Symbols: | Ribonuclease E inhibitor RraA/Dimethylmenaquinone methyltransferase | chr5:5374357-5375342 FORWARD LENGTH=166;AT5G16450.1 | Symbols: | Ribonuclease E inhibitor RraA/Dimethylmenaquinone methyltransferase | chr5:5374357-5375342 FOR	AT5G16450.2;AT5G16450.1	AT5G16450.2;AT5G16450.1		9	9	7	45.8	45.8	33.7	17.82	0	148.2	978220000	84	23.2663	23.1612	23.1239	23.62	23.9941	23.89	23.8631	23.9375
0.771477	0.627803	AT1G51360.1 | Symbols: ATDABB1, DABB1 | dimeric A/B barrel domainS-protein 1 | chr1:19044208-19044840 FORWARD LENGTH=210	AT1G51360.1	AT1G51360.1		5	5	5	47.1	47.1	47.1	23.651	0	39.355	403640000	52	22.7924	22.6594	21.3074	23.0934	23.0162	22.9558	23.2734	23.1183
0.955387	0.625744	AT5G12470.1 | Symbols: | Protein of unknown function (DUF3411) | chr5:4044950-4047290 REVERSE LENGTH=386	AT5G12470.1	AT5G12470.1		9	9	9	27.5	27.5	27.5	41.323	0	67.15	865980000	83	21.0321	20.8825	21.2083	20.8832	20.7558	21.7219	22.3343	21.697
2.15726	0.618593	AT2G40590.1 | Symbols: | Ribosomal protein S26e family protein | chr2:16945215-16946345 REVERSE LENGTH=131	AT2G40590.1	AT2G40590.1		7	7	1	42	42	9.2	14.729	0	75.189	6513300000	134	26.8124	26.9569	26.8979	26.5939	27.5365	27.7595	27.222	27.2175
1.46779	0.616121	AT2G27190.1 | Symbols: PAP1, ATPAP1, PAP12, ATPAP12 | purple acid phosphatase 12 | chr2:11621400-11623438 REVERSE LENGTH=469	AT2G27190.1	AT2G27190.1		13	13	13	36.9	36.9	36.9	54.122	0	323.31	12844000000	236	28.3302	28.2414	27.9351	27.4113	28.3382	28.74	28.6583	28.646
0.775924	0.615001	AT1G15930.2 | Symbols: | Ribosomal protein L7Ae/L30e/S12e/Gadd45 family protein | chr1:5471702-5472741 FORWARD LENGTH=144;AT1G15930.1 | Symbols: | Ribosomal protein L7Ae/L30e/S12e/Gadd45 family protein | chr1:5471702-5472741 FORWARD LENGTH=144	AT1G15930.2;AT1G15930.1	AT1G15930.2;AT1G15930.1		12	9	9	54.2	36.1	36.1	15.377	0	116	3203100000	135	25.3846	25.4506	24.6083	24.0846	25.6144	25.9047	24.8899	25.5792
2.71478	0.612456	AT1G15340.1 | Symbols: MBD10 | methyl-CPG-binding domain 10 | chr1:5275895-5277474 REVERSE LENGTH=384;AT1G15340.2 | Symbols: MBD10 | methyl-CPG-binding domain 10 | chr1:5275895-5277474 REVERSE LENGTH=332	AT1G15340.1;AT1G15340.2	AT1G15340.1;AT1G15340.2		24	24	22	69.8	69.8	68	42.357	0	323.31	13854000000	330	27.1752	26.9371	27.0492	27.2428	27.9962	27.6273	27.5854	27.6452
2.58143	0.600539	AT2G01250.1 | Symbols: | Ribosomal protein L30/L7 family protein | chr2:132943-134264 REVERSE LENGTH=242;AT2G01250.2 | Symbols: | Ribosomal protein L30/L7 family protein | chr2:133038-134264 REVERSE LENGTH=184	AT2G01250.1;AT2G01250.2	AT2G01250.1;AT2G01250.2		30	30	12	76	76	44.6	28.171	0	323.31	22216000000	525	26.883	26.5822	26.796	27.087	27.4986	27.4065	27.5666	27.2786
2.78849	0.596558	AT4G36130.1 | Symbols: | Ribosomal protein L2 family | chr4:17097613-17098656 FORWARD LENGTH=258	AT4G36130.1;AT3G51190.1	AT4G36130.1		25	25	7	73.3	73.3	27.5	27.948	0	323.31	17610000000	448	26.6176	26.5666	26.6641	26.7853	27.5211	27.2349	27.2254	27.0385
3.37673	0.592786	AT3G14990.1 | Symbols: | Class I glutamine amidotransferase-like superfamily protein | chr3:5047510-5049621 FORWARD LENGTH=392;AT3G14990.3 | Symbols: | Class I glutamine amidotransferase-like superfamily protein | chr3:5047683-5049621 FORWARD LENGTH=369;	AT3G14990.1;AT3G14990.3;AT3G14990.2	AT3G14990.1;AT3G14990.3;AT3G14990.2		29	29	29	65.3	65.3	65.3	41.857	0	323.31	15071000000	535	27.2818	27.5009	27.502	27.2762	27.8901	28.1027	28.0501	27.8891
2.33474	0.59208	AT3G53430.1 | Symbols: | Ribosomal protein L11 family protein | chr3:19809895-19810395 REVERSE LENGTH=166	AT3G53430.1	AT3G53430.1		11	11	2	66.9	66.9	21.1	17.97	0	223.09	14904000000	225	27.3522	27.0791	27.0934	27.644	27.9355	27.9009	27.8719	27.8286
1.68832	0.587378	AT2G16060.1 | Symbols: GLB1, AHB1, ARATH GLB1, NSHB1, ATGLB1, HB1 | hemoglobin 1 | chr2:6982782-6983522 REVERSE LENGTH=160	AT2G16060.1	AT2G16060.1		24	24	24	98.1	98.1	98.1	18.034	0	323.31	27230000000	406	27.6138	27.7518	27.9163	27.6734	28.3139	28.2408	28.7997	27.9504
2.91838	0.586298	AT3G22850.1 | Symbols: | Aluminium induced protein with YGL and LRDR motifs | chr3:8089067-8090275 FORWARD LENGTH=248	AT3G22850.1	AT3G22850.1		15	14	14	60.1	55.6	55.6	27.107	0	323.31	4429300000	199	25.5873	25.4276	25.3885	25.2668	26.2346	25.957	25.9109	25.9129
3.51509	-0.585618	AT4G38460.1 | Symbols: GGR | geranylgeranyl reductase | chr4:17994849-17995974 FORWARD LENGTH=326	AT4G38460.1	AT4G38460.1		8	8	8	51.2	51.2	51.2	35.188	0	40.434	405820000	52	20.845	20.8158	21.105	21.0355	20.3995	20.3264	20.2908	20.4421
1.87507	-0.5859	AT1G16300.1 | Symbols: GAPCP-2 | glyceraldehyde-3-phosphate dehydrogenase of plastid 2 | chr1:5574433-5577406 FORWARD LENGTH=420	AT1G16300.1	AT1G16300.1		20	8	8	56.7	27.6	27.6	44.845	0	132.12	484910000	66	20.9863	20.5025	20.9999	20.8706	20.394	20.5098	19.9632	20.1489
1.79958	-0.586695	AT1G73460.1 | Symbols: | Protein kinase superfamily protein | chr1:27620122-27624899 FORWARD LENGTH=1169	AT1G73460.1;AT1G73450.1	AT1G73460.1		8	8	8	12	12	12	131.24	0	24.413	80707000	27	20.8411	21.1581	20.6202	21.1289	20.6137	20.1503	20.1364	20.5012
1.11469	-0.586769	AT5G66860.1 | Symbols: | Ribosomal protein L25/Gln-tRNA synthetase, anti-codon-binding domain | chr5:26701233-26702531 REVERSE LENGTH=249	AT5G66860.1	AT5G66860.1		9	9	9	47.8	47.8	47.8	27.336	0	150.82	2057600000	74	20.4931	20.9798	21.1969	20.6729	20.9024	20.1989	19.9313	19.963
1.77512	-0.587312	AT2G31490.1 | Symbols: | unknown protein;Has 55 Blast hits to 55 proteins in 15 species: Archae - 0;Bacteria - 0;Metazoa - 0;Fungi - 0;Plants - 55;Viruses - 0;Other Eukaryotes - 0 (source: NCBI BLink). | chr2:13412060-13413002 FORWARD LENGTH=71	AT2G31490.1	AT2G31490.1		5	5	5	59.2	59.2	59.2	8.2914	0	16.269	265490000	27	20.803	20.7198	21.1264	20.8008	20.4515	20.5141	20.3047	19.8303
2.57375	-0.588263	AT3G13150.1 | Symbols: | Tetratricopeptide repeat (TPR)-like superfamily protein | chr3:4227975-4229630 REVERSE LENGTH=551	AT3G13150.1	AT3G13150.1		8	8	8	17.2	17.2	17.2	60.629	0	69.576	211610000	20	21.1185	20.9135	21.0742	20.8635	20.6751	20.2066	20.2922	20.4428
2.18914	-0.588416	AT2G03690.1 | Symbols: | coenzyme Q biosynthesis Coq4 family protein / ubiquinone biosynthesis Coq4 family protein | chr2:1122122-1123011 REVERSE LENGTH=226	AT2G03690.1	AT2G03690.1		11	11	11	66.8	66.8	66.8	25.879	0	226.32	2321800000	111	20.9654	20.773	21.1263	21.2716	20.6003	20.251	20.6216	20.3098
2.40022	-0.588553	AT2G20860.1 | Symbols: LIP1 | lipoic acid synthase 1 | chr2:8979636-8980983 FORWARD LENGTH=374	AT2G20860.1	AT2G20860.1		9	9	9	37.4	37.4	37.4	41.344	0	117.28	573230000	46	20.7465	20.9343	21.2629	20.84	20.2593	20.4886	20.4496	20.2321
1.94621	-0.589232	AT5G13260.1 | Symbols: | unknown protein;BEST Arabidopsis thaliana protein match is: unknown protein (TAIR:AT3G48860.2);Has 30201 Blast hits to 17322 proteins in 780 species: Archae - 12;Bacteria - 1396;Metazoa - 17338;Fungi - 3422;Plants - 5037;Vi	AT5G13260.1	AT5G13260.1		11	11	11	32.6	32.6	32.6	59.715	0	24.819	127300000	38	20.7514	20.7585	21.0585	20.8998	20.2232	20.4798	20.523	19.8853
1.94799	-0.589385	AT3G13490.1 | Symbols: OVA5, ATKRS-2 | Lysyl-tRNA synthetase, class II | chr3:4395984-4399302 REVERSE LENGTH=602	AT3G13490.1	AT3G13490.1		13	13	13	32.7	32.7	32.7	67.587	0	83.939	650650000	82	21.3257	20.6027	21.0934	20.9563	20.5479	20.4694	20.2968	20.3064
1.45143	-0.590399	AT5G55140.1 | Symbols: | ribosomal protein L30 family protein | chr5:22381370-22381787 FORWARD LENGTH=109	AT5G55140.1	AT5G55140.1		6	6	6	60.6	60.6	60.6	12.359	0	121.95	719230000	44	21.0491	20.8373	21.0805	20.8897	20.8331	20.1586	20.5998	19.9035
3.53704	-0.590408	AT5G05990.1 | Symbols: | Mitochondrial glycoprotein family protein | chr5:1806911-1807895 REVERSE LENGTH=259	AT5G05990.1	AT5G05990.1		7	7	7	34	34	34	30.069	0	45.16	355380000	21	21.0231	21.1109	21.1948	21.1147	20.6875	20.586	20.4165	20.3918
2.18188	-0.590603	AT5G64430.1 | Symbols: | Octicosapeptide/Phox/Bem1p family protein | chr5:25762540-25764081 REVERSE LENGTH=513	AT5G64430.1	AT5G64430.1		9	8	8	36.5	36.5	36.5	56.44	0	36.83	222190000	31	21.3059	20.7478	21.2213	21.1213	20.4259	20.5499	20.7048	20.3533
3.12888	-0.590876	AT1G68060.1 | Symbols: ATMAP70-1, MAP70-1 | microtubule-associated proteins 70-1 | chr1:25511392-25514226 REVERSE LENGTH=622	AT1G68060.1;AT1G24764.1	AT1G68060.1		9	9	4	19	19	8.5	69.289	0	84.716	419170000	26	21.0041	21.0819	21.1405	21.0274	20.4202	20.2536	20.6665	20.55
3.16118	-0.59128	AT3G02660.1 | Symbols: emb2768 | Tyrosyl-tRNA synthetase, class Ib, bacterial/mitochondrial | chr3:570221-571756 REVERSE LENGTH=511	AT3G02660.1	AT3G02660.1		5	5	5	12.5	12.5	12.5	56.618	0	21.8	186630000	26	20.9128	20.9337	21.1961	21.0934	20.4673	20.5953	20.4194	20.2889
1.93362	-0.592261	AT5G43280.1 | Symbols: ATDCI1, DCI1 | delta(3,5),delta(2,4)-dienoyl-CoA isomerase 1 | chr5:17367947-17369113 FORWARD LENGTH=278;AT5G43280.2 | Symbols: ATDCI1, DCI1 | delta(3,5),delta(2,4)-dienoyl-CoA isomerase 1 | chr5:17367947-17368750 FORWARD LENGTH=220	AT5G43280.1;AT5G43280.2	AT5G43280.1;AT5G43280.2		6	6	6	46	46	46	29.92	0	50.216	203900000	27	20.8925	20.8974	20.8022	20.9538	20.7673	20.2448	20.063	20.1018
1.72048	-0.59269	AT5G09770.1 | Symbols: | Ribosomal protein L17 family protein | chr5:3035267-3036518 REVERSE LENGTH=160	AT5G09770.1	AT5G09770.1		12	12	6	72.5	72.5	45	18.445	0	138.45	799720000	53	20.9601	20.8663	21.2503	21.1456	20.5927	20.5126	20.7539	19.9923
1.41062	-0.593923	AT4G19540.1 | Symbols: INDL | IND1(iron-sulfur protein required for NADH dehydrogenase)-like | chr4:10657517-10659094 FORWARD LENGTH=313	AT4G19540.1	AT4G19540.1		8	8	8	38.3	38.3	38.3	33.426	0	47.889	356090000	58	21.1249	20.851	21.1871	20.8019	20.9722	20.0865	20.1304	20.4002
2.84007	-0.595234	AT5G12210.2 | Symbols: | RAB geranylgeranyl transferase beta subunit 1 | chr5:3947254-3949595 FORWARD LENGTH=320;AT5G12210.1 | Symbols: AtRGTB1, RGTB1 | RAB geranylgeranyl transferase beta subunit 1 | chr5:3947254-3949595 FORWARD LENGTH=321	AT5G12210.2;AT5G12210.1	AT5G12210.2;AT5G12210.1		2	2	2	10.3	10.3	10.3	35.367	0	17.444	183890000	15	20.8751	21.0528	20.9485	21.1655	20.598	20.5285	20.2675	20.2671
2.3009	-0.595257	AT4G39850.1 | Symbols: PXA1, PED3, CTS, ACN2, AtABCD1 | peroxisomal ABC transporter 1 | chr4:18489220-18496762 FORWARD LENGTH=1337;AT4G39850.2 | Symbols: PXA1 | peroxisomal ABC transporter 1 | chr4:18489220-18496762 FORWARD LENGTH=1338;AT4G39850.3 | Symbol	AT4G39850.1;AT4G39850.2;AT4G39850.3	AT4G39850.1;AT4G39850.2;AT4G39850.3		17	17	17	21.2	21.2	21.2	149.57	0	165.29	567790000	54	21.2322	21.1151	20.9485	20.6612	20.5531	20.2612	20.3618	20.3998
2.62836	-0.595715	AT5G20090.3 | Symbols: | Uncharacterised protein family (UPF0041) | chr5:6787543-6788000 REVERSE LENGTH=97;AT5G20090.2 | Symbols: | Uncharacterised protein family (UPF0041) | chr5:6787246-6788000 REVERSE LENGTH=110;AT5G20090.1 | Symbols: | Uncharacteris	AT5G20090.3;AT5G20090.2;AT5G20090.1	AT5G20090.3;AT5G20090.2;AT5G20090.1		3	3	3	42.3	42.3	42.3	10.904	0	117.49	5776400000	40	21.1239	20.6264	20.993	21.0253	20.2865	20.342	20.2795	20.4777
1.91491	-0.595941	AT2G45060.1 | Symbols: | Uncharacterised conserved protein UCP022280 | chr2:18584674-18586688 REVERSE LENGTH=272	AT2G45060.1	AT2G45060.1		17	17	17	69.5	69.5	69.5	30.337	0	323.31	4075400000	162	20.8473	20.7792	21.0586	20.9974	20.5412	20.4521	19.8639	20.4416
1.88279	-0.59639	AT1G33780.1 | Symbols: | Protein of unknown function (DUF179) | chr1:12244799-12246034 REVERSE LENGTH=325	AT1G33780.1	AT1G33780.1		7	7	7	24	24	24	36.392	0	16.773	275260000	30	20.9701	21.1155	21.2437	20.7257	20.1857	20.3463	20.7915	20.3459
2.97883	-0.596776	AT1G55890.1 | Symbols: | Tetratricopeptide repeat (TPR)-like superfamily protein | chr1:20901364-20902560 FORWARD LENGTH=398	AT1G55890.1	AT1G55890.1		22	22	22	63.6	63.6	63.6	44.994	0	199.51	2262900000	154	21.015	20.9161	20.9149	20.7347	20.5064	20.3553	20.1716	20.1602
2.11583	-0.597761	AT3G03070.1 | Symbols: | NADH-ubiquinone oxidoreductase-related | chr3:696593-698069 REVERSE LENGTH=110	AT3G03070.1	AT3G03070.1		5	5	5	48.2	48.2	48.2	12.234	0	48.44	1062800000	64	20.8265	20.7913	21.2818	20.7824	20.3527	20.3406	20.5216	20.0761
2.10274	-0.598017	AT5G02740.1 | Symbols: | Ribosomal protein S24e family protein | chr5:616517-618267 FORWARD LENGTH=228;AT5G02740.2 | Symbols: | Ribosomal protein S24e family protein | chr5:616517-617721 FORWARD LENGTH=185	AT5G02740.1;AT5G02740.2	AT5G02740.1;AT5G02740.2		6	6	6	38.6	38.6	38.6	25.224	0	103.45	881880000	42	20.9565	20.6158	20.9036	20.79	20.5941	20.1985	20.1028	19.9784
4.45637	-0.598693	AT2G45140.1 | Symbols: PVA12 | plant VAP homolog 12 | chr2:18611029-18612971 FORWARD LENGTH=239	AT2G45140.1	AT2G45140.1		11	10	10	52.7	47.7	47.7	26.442	0	160.38	1570900000	89	21.0057	20.9555	21.1532	21.0394	20.511	20.4211	20.4772	20.3497
1.40746	-0.598849	AT1G57610.2 | Symbols: | Protein of unknown function (DUF607) | chr1:21337449-21338412 REVERSE LENGTH=293;AT1G57610.1 | Symbols: | Protein of unknown function (DUF607) | chr1:21337449-21338412 REVERSE LENGTH=293;AT1G57610.3 | Symbols: | Protein of unkno	AT1G57610.2;AT1G57610.1;AT1G57610.3;AT1G09575.1	AT1G57610.2;AT1G57610.1;AT1G57610.3		9	9	9	43.3	43.3	43.3	33.685	0	257.54	642170000	79	20.6514	20.8801	21.13	20.9921	20.6854	20.6468	20.0124	19.9137
2.37616	-0.599138	AT3G48110.1 | Symbols: EDD1, EDD | glycine-tRNA ligases | chr3:17763111-17770964 FORWARD LENGTH=1067	AT3G48110.1	AT3G48110.1		12	12	12	16	16	16	119.77	0	51.344	312140000	47	21.0625	20.7692	21.0678	20.8511	20.5703	20.1083	20.4787	20.1966
1.85139	-0.599709	AT3G03060.1 | Symbols: | P-loop containing nucleoside triphosphate hydrolases superfamily protein | chr3:692188-695424 FORWARD LENGTH=628	AT3G03060.1	AT3G03060.1		24	16	16	37.6	28.3	28.3	69.566	0	223.56	1506700000	121	20.8369	20.9224	21.1031	21.0755	20.6793	20.6549	20.1251	20.0797
1.86317	-0.599792	AT5G27540.2 | Symbols: MIRO1 | MIRO-related GTP-ase 1 | chr5:9722816-9727112 FORWARD LENGTH=648;AT5G27540.1 | Symbols: MIRO1, emb2473 | MIRO-related GTP-ase 1 | chr5:9722816-9727112 FORWARD LENGTH=648	AT5G27540.2;AT5G27540.1	AT5G27540.2;AT5G27540.1		41	41	41	70.1	70.1	70.1	72.322	0	323.31	12111000000	477	20.8525	20.9126	21.1603	20.7062	20.6753	19.9845	20.3748	20.198
1.44792	-0.599795	AT1G05270.1 | Symbols: | TraB family protein | chr1:1531806-1534305 REVERSE LENGTH=371	AT1G05270.1	AT1G05270.1		3	3	3	10.2	10.2	10.2	40.741	0	13.624	146800000	24	21.1867	20.6169	21.28	21.1492	20.3582	20.936	20.3559	20.1835
1.74015	-0.600461	AT4G31810.1 | Symbols: | ATP-dependent caseinolytic (Clp) protease/crotonase family protein | chr4:15387365-15390290 REVERSE LENGTH=409	AT4G31810.1	AT4G31810.1		14	14	14	56.7	56.7	56.7	45.499	0	151.66	1414200000	103	20.9159	20.8712	21.2074	20.907	20.7266	20.3826	20.4751	19.9153
1.66113	-0.600972	AT5G05520.1 | Symbols: | Outer membrane OMP85 family protein | chr5:1632912-1635104 FORWARD LENGTH=524	AT5G05520.1	AT5G05520.1		27	27	25	61.1	61.1	57.6	58.519	0	323.31	1788200000	135	20.8814	20.8871	21.3099	20.9474	20.0684	20.6154	20.7584	20.1798
1.87452	-0.601238	AT1G01820.1 | Symbols: PEX11C | peroxin 11c | chr1:296213-297723 REVERSE LENGTH=235	AT1G01820.1	AT1G01820.1		9	8	8	47.7	43	43	25.912	0	323.31	1141100000	60	20.9465	20.9044	20.957	21.1225	20.8138	20.1405	20.4725	20.0987
2.24729	-0.601678	AT2G39960.1 | Symbols: | Microsomal signal peptidase 25 kDa subunit (SPC25) | chr2:16681666-16683491 REVERSE LENGTH=192	AT2G39960.1	AT2G39960.1		8	8	7	34.4	34.4	34.4	21.642	0	46.74	579970000	41	21.2374	20.9959	21.0336	21.0008	20.6184	20.7226	20.387	20.133
1.8188	-0.602029	AT5G27760.1 | Symbols: | Hypoxia-responsive family protein | chr5:9830396-9831559 FORWARD LENGTH=96	AT5G27760.1	AT5G27760.1		4	4	4	58.3	58.3	58.3	10.655	0	109.85	2344300000	45	20.9051	20.7827	21.2676	20.8612	20.6662	20.4535	19.9852	20.3036
2.92801	-0.602571	AT5G08540.1 | Symbols: | unknown protein;FUNCTIONS IN: molecular_function unknown;INVOLVED IN: biological_process unknown;LOCATED IN: chloroplast thylakoid membrane, chloroplast, chloroplast envelope;EXPRESSED IN: 24 plant structures;EXPRESSED DURING	AT5G08540.1	AT5G08540.1		19	19	19	50	50	50	38.655	0	265.4	2220600000	176	20.8153	21.1479	20.9458	20.9938	20.3734	20.3808	20.5615	20.1767
2.37931	-0.60308	AT5G67590.1 | Symbols: FRO1 | NADH-ubiquinone oxidoreductase-related | chr5:26958073-26959356 FORWARD LENGTH=154	AT5G67590.1	AT5G67590.1		14	14	14	59.7	59.7	59.7	17.134	0	195.9	3411300000	154	20.7521	21.0555	21.2808	21.0035	20.5532	20.5073	20.4237	20.1954
3.06048	-0.603327	AT1G70580.4 | Symbols: AOAT2, GGT2 | alanine-2-oxoglutarate aminotransferase 2 | chr1:26613222-26615845 FORWARD LENGTH=481;AT1G70580.3 | Symbols: AOAT2, GGT2 | alanine-2-oxoglutarate aminotransferase 2 | chr1:26613222-26615845 FORWARD LENGTH=481;AT1G70580.	AT1G70580.4;AT1G70580.3;AT1G70580.2;AT1G70580.1	AT1G70580.4;AT1G70580.3;AT1G70580.2;AT1G70580.1		23	23	10	59	59	32	53.444	0	318.67	1085900000	112	20.9964	21.0902	21.0028	21.3753	20.4618	20.6293	20.439	20.5213
2.14509	-0.603613	AT3G55760.3 | Symbols: | unknown protein;EXPRESSED IN: 16 plant structures;EXPRESSED DURING: 10 growth stages;BEST Arabidopsis thaliana protein match is: unknown protein (TAIR:AT1G42430.2). | chr3:20700648-20702886 FORWARD LENGTH=578;AT3G55760.2 | Symb	AT3G55760.3;AT3G55760.2;AT3G55760.1	AT3G55760.3;AT3G55760.2;AT3G55760.1		13	13	13	34.4	34.4	34.4	65.572	0	43.307	233440000	40	20.8394	20.8513	20.9926	21.1319	20.4898	20.6043	20.3199	19.9867
2.07138	-0.604025	AT1G70190.2 | Symbols: | Ribosomal protein L7/L12, oligomerisation;Ribosomal protein L7/L12, C-terminal/adaptor protein ClpS-like | chr1:26430616-26431242 FORWARD LENGTH=208;AT1G70190.1 | Symbols: | Ribosomal protein L7/L12, oligomerisation;Ribosomal pro	AT1G70190.2;AT1G70190.1	AT1G70190.2;AT1G70190.1		8	8	8	55.3	55.3	55.3	22.722	0	32.201	446370000	45	21.0188	20.9997	21.3854	20.8418	20.6378	20.5655	20.473	20.1533
2.17753	-0.605106	AT1G70660.2 | Symbols: MMZ2 | MMS ZWEI homologue 2 | chr1:26640755-26641981 FORWARD LENGTH=148;AT1G70660.1 | Symbols: MMZ2, UEV1B | MMS ZWEI homologue 2 | chr1:26640755-26641949 FORWARD LENGTH=159;AT1G70650.2 | Symbols: | Ran BP2/NZF zinc finger-like supe	AT1G70660.2;AT1G70660.1;AT1G70650.2	AT1G70660.2;AT1G70660.1;AT1G70650.2		5	3	3	23.6	16.9	16.9	16.942	0	15.067	59859000	15	21.0645	20.6699	21.2092	21.0181	20.6426	20.2565	20.2248	20.4172
1.80587	-0.606048	AT1G35620.1 | Symbols: ATPDIL5-2, ATPDI8, PDI8, PDIL5-2 | PDI-like 5-2 | chr1:13156504-13158280 FORWARD LENGTH=440	AT1G35620.1	AT1G35620.1		13	13	13	24.3	24.3	24.3	49.85	0	53.395	910200000	59	20.9537	20.7792	20.9777	20.939	20.7105	20.2871	20.372	19.8558
2.30197	-0.606288	AT5G03540.1 | Symbols: ATEXO70A1, EXO70A1 | exocyst subunit exo70 family protein A1 | chr5:889606-893916 FORWARD LENGTH=638;AT5G03540.3 | Symbols: EXO70A1 | exocyst subunit exo70 family protein A1 | chr5:889606-893916 FORWARD LENGTH=664;AT5G03540.2 | Symbo	AT5G03540.1;AT5G03540.3;AT5G03540.2	AT5G03540.1;AT5G03540.3;AT5G03540.2		20	20	18	45.1	45.1	40.4	72.298	0	141.81	529660000	85	21.3844	20.9748	21.0679	20.8026	20.5718	20.3693	20.5654	20.2981
2.02719	-0.607327	AT5G64400.1 | Symbols: | CONTAINS InterPro DOMAIN/s: CHCH (InterPro:IPR010625);BEST Arabidopsis thaliana protein match is: Cox19-like CHCH family protein (TAIR:AT5G09570.1);Has 1807 Blast hits to 1807 proteins in 277 species: Archae - 0;Bacteria - 0;M	AT5G64400.1;AT5G64400.2	AT5G64400.1;AT5G64400.2		4	4	4	65.3	65.3	65.3	14.404	0	212.45	763770000	56	20.7482	20.6673	21.2488	20.9357	20.346	20.0183	20.3314	20.475
2.11061	-0.607912	AT1G08450.1 | Symbols: CRT3, PSL1, EBS2, AtCRT3 | calreticulin 3 | chr1:2668008-2671800 REVERSE LENGTH=424;AT1G08450.2 | Symbols: CRT3, PSL1, EBS2, AtCRT3 | calreticulin 3 | chr1:2668008-2671800 REVERSE LENGTH=370;AT1G08450.3 | Symbols: CRT3 | calreticulin	AT1G08450.1;AT1G08450.2;AT1G08450.3	AT1G08450.1;AT1G08450.2;AT1G08450.3		11	11	11	26.9	26.9	26.9	49.843	0	43.553	322240000	44	21.0034	20.8994	21.123	21.0344	20.3206	20.7754	20.4656	20.067
1.55232680037773	-0.60841	AT5G30510.1 | Symbols: RPS1, ARRPS1 | ribosomal protein S1 | chr5:11619262-11621223 REVERSE LENGTH=416	AT5G30510.1	AT5G30510.1		14	14	14	37	37	37	45.11	0	81.595	546030000	73	21.0224	21.1263	21.423	21.0354	20.739	20.9703	20.3226	20.1415
1.99693	-0.608423	AT2G17670.1 | Symbols: | Tetratricopeptide repeat (TPR)-like superfamily protein | chr2:7674420-7675811 FORWARD LENGTH=463;AT2G17670.2 | Symbols: | Tetratricopeptide repeat (TPR)-like superfamily protein | chr2:7674420-7675575 FORWARD LENGTH=349	AT2G17670.1;AT2G17670.2	AT2G17670.1;AT2G17670.2		8	8	8	28.1	28.1	28.1	51.408	0	67.759	401480000	45	20.7528	20.9612	21.0068	21.0015	20.7465	20.3312	20.1636	20.0473
2.65375	-0.60908	AT2G36070.1 | Symbols: ATTIM44-2, TIM44-2 | translocase inner membrane subunit 44-2 | chr2:15145119-15147895 REVERSE LENGTH=469	AT2G36070.1;AT2G20510.1	AT2G36070.1		26	26	26	59.9	59.9	59.9	53.645	0	244.63	2961300000	198	20.9736	20.828	21.0333	21.2463	20.3892	20.6218	20.2217	20.4122
3.77797	-0.609854	AT3G58840.2 | Symbols: | Tropomyosin-related | chr3:21757499-21758455 REVERSE LENGTH=318;AT3G58840.1 | Symbols: | Tropomyosin-related | chr3:21757499-21758455 REVERSE LENGTH=318	AT3G58840.2;AT3G58840.1	AT3G58840.2;AT3G58840.1		10	10	10	41.2	41.2	41.2	36.595	0	310.86	2018800000	88	21.0214	20.8906	21.049	20.9517	20.4805	20.2352	20.4766	20.281
3.12627	-0.612767	AT2G41100.4 | Symbols: TCH3 | Calcium-binding EF hand family protein | chr2:17138131-17139406 FORWARD LENGTH=324;AT2G41100.1 | Symbols: TCH3, ATCAL4 | Calcium-binding EF hand family protein | chr2:17138131-17139406 FORWARD LENGTH=324;AT2G41100.3 | Symbols:	AT2G41100.4;AT2G41100.1;AT2G41100.3;AT2G41100.2	AT2G41100.4;AT2G41100.1;AT2G41100.3;AT2G41100.2		13	13	13	55.2	55.2	55.2	36.807	0	42.308	326040000	40	21.09	20.9628	20.924	21.2467	20.5545	20.5442	20.2877	20.386
2.04303	-0.613282	AT5G40930.1 | Symbols: TOM20-4 | translocase of outer membrane 20-4 | chr5:16404523-16405825 FORWARD LENGTH=187	AT5G40930.1	AT5G40930.1		7	7	7	38.5	38.5	38.5	20.972	0	26.649	227840000	24	20.882	20.8469	20.9954	21.0019	20.2167	20.6886	20.4202	19.9476
3.14304	-0.613392	AT3G26770.1 | Symbols: | NAD(P)-binding Rossmann-fold superfamily protein | chr3:9845494-9847079 FORWARD LENGTH=306	AT3G26770.1	AT3G26770.1		8	8	8	35.3	35.3	35.3	31.783	0	23.38	288850000	33	20.6254	20.8976	20.9478	20.8189	20.2814	20.242	20.0147	20.2981
1.75849	-0.613893	AT1G04430.2 | Symbols: | S-adenosyl-L-methionine-dependent methyltransferases superfamily protein | chr1:1198860-1201301 FORWARD LENGTH=623;AT1G04430.1 | Symbols: | S-adenosyl-L-methionine-dependent methyltransferases superfamily protein | chr1:1198860-1	AT1G04430.2;AT1G04430.1	AT1G04430.2;AT1G04430.1		37	28	27	69.5	62.8	61.2	70.507	0	279.4	2022700000	118	21.0794	20.6174	21.0588	21.2247	20.4706	20.5393	20.5382	19.9766
2.18277	-0.614624	AT3G62920.1 | Symbols: | unknown protein;Has 25 Blast hits to 25 proteins in 11 species: Archae - 0;Bacteria - 0;Metazoa - 0;Fungi - 0;Plants - 25;Viruses - 0;Other Eukaryotes - 0 (source: NCBI BLink). | chr3:23260717-23261171 FORWARD LENGTH=80	AT3G62920.1	AT3G62920.1		5	5	5	75	75	75	9.1464	0	18.23	621070000	29	20.8516	21.0122	20.8686	21.1428	20.7421	20.179	20.3305	20.165
2.74103	-0.615008	AT1G16740.1 | Symbols: | Ribosomal protein L20 | chr1:5727773-5728950 FORWARD LENGTH=126	AT1G16740.1	AT1G16740.1		7	7	7	46	46	46	14.722	0	62.641	649020000	38	21.0017	20.7904	21.1494	21.0999	20.457	20.4047	20.5584	20.1613
2.52864	-0.615332	AT4G09730.1 | Symbols: RH39 | RH39 | chr4:6136333-6139510 FORWARD LENGTH=621	AT4G09730.1	AT4G09730.1		10	10	10	32	32	32	68.923	0	63.593	271460000	40	20.7219	21.0623	21.1312	20.9248	20.485	20.5157	20.1661	20.2121
3.54663	-0.615712	AT3G16940.1 | Symbols: | calmodulin binding;transcription regulators | chr3:5781959-5785985 FORWARD LENGTH=845	AT3G16940.1	AT3G16940.1		7	7	7	17.9	17.9	17.9	96.177	0	15.197	123100000	24	21.139	20.9491	21.2106	21.0699	20.6091	20.5325	20.3347	20.4295
2.18519	-0.616501	AT5G44710.1 | Symbols: | CONTAINS InterPro DOMAIN/s: Ribosomal protein S27/S33, mitochondrial (InterPro:IPR013219);Has 101 Blast hits to 101 proteins in 55 species: Archae - 0;Bacteria - 0;Metazoa - 8;Fungi - 59;Plants - 26;Viruses - 0;Other Eukary	AT5G44710.1	AT5G44710.1		5	5	5	52	52	52	11.529	0	20.031	432280000	34	20.7957	20.8712	20.911	21.2255	20.2875	20.6592	20.0937	20.2971
2.73486	-0.617222	AT5G56360.1 | Symbols: PSL4 | calmodulin-binding protein | chr5:22823586-22827950 REVERSE LENGTH=647	AT5G56360.1	AT5G56360.1		12	12	12	26.6	26.6	26.6	73.213	0	58.389	414420000	46	21.2159	20.785	21.0565	21.0554	20.5567	20.4208	20.4632	20.2032
1.7712	-0.617507	AT1G11860.3 | Symbols: | Glycine cleavage T-protein family | chr1:4001801-4003245 FORWARD LENGTH=408;AT1G11860.2 | Symbols: | Glycine cleavage T-protein family | chr1:4001801-4003245 FORWARD LENGTH=408;AT1G11860.1 | Symbols: | Glycine cleavage T-protein	AT1G11860.3;AT1G11860.2;AT1G11860.1	AT1G11860.3;AT1G11860.2;AT1G11860.1		21	21	21	58.8	58.8	58.8	44.444	0	170.73	2499300000	134	20.7428	20.6778	21.1324	21.2219	20.2068	20.3032	20.6955	20.0994
2.20378	-0.61797	AT3G17465.1 | Symbols: RPL3P | ribosomal protein L3 plastid | chr3:5978059-5979572 REVERSE LENGTH=324	AT3G17465.1	AT3G17465.1		11	11	11	37	37	37	35.404	0	247.07	1975500000	78	21.1541	21.16	20.8847	20.7665	20.4382	20.5307	20.486	20.0385
2.50202	-0.618706	AT4G39880.1 | Symbols: | Ribosomal protein L23/L15e family protein | chr4:18504601-18505137 FORWARD LENGTH=178	AT4G39880.1	AT4G39880.1		13	13	13	65.7	65.7	65.7	19.852	0	102.9	649160000	57	20.9785	21.0758	21.0201	21.1426	20.4761	20.3673	20.7505	20.1481
2.14684	-0.619666	AT2G43400.1 | Symbols: ETFQO | electron-transfer flavoprotein:ubiquinone oxidoreductase | chr2:18021304-18025041 FORWARD LENGTH=633	AT2G43400.1	AT2G43400.1		12	12	12	38.2	38.2	38.2	70.127	0	253.86	930520000	60	20.8291	20.6662	21.1849	21.0951	20.4959	20.4855	20.1032	20.212
1.57644	-0.620655	AT5G62270.2 | Symbols: | FUNCTIONS IN: molecular_function unknown;INVOLVED IN: biological_process unknown;LOCATED IN: cellular_component unknown;BEST Arabidopsis thaliana protein match is: mucin-related (TAIR:AT2G02880.1). | chr5:25012227-25014486 FORW	AT5G62270.2;AT5G62270.1	AT5G62270.2;AT5G62270.1		17	17	17	48.8	48.8	48.8	48.313	0	323.31	1756500000	90	21.1443	21.0348	21.2751	20.7929	20.7764	20.7221	20.002	20.264
2.02343	-0.620906	AT1G69210.1 | Symbols: | Uncharacterised protein family UPF0090 | chr1:26018583-26020058 REVERSE LENGTH=305	AT1G69210.1;AT1G69210.2	AT1G69210.1		9	9	9	24.6	24.6	24.6	34.22	0	34.531	301940000	32	20.7239	21.1818	21.0653	21.3763	20.6143	20.5112	20.5433	20.195
2.03272	-0.621073	AT3G25120.1 | Symbols: | Mitochondrial import inner membrane translocase subunit Tim17/Tim22/Tim23 family protein | chr3:9149785-9151068 REVERSE LENGTH=189	AT3G25120.1	AT3G25120.1		4	4	4	40.2	40.2	40.2	20.371	0	45.064	209720000	32	21.0194	20.8031	20.9098	20.9334	20.2524	20.7164	19.9465	20.2662
3.93292	-0.621891	AT3G17910.1 | Symbols: SURF1 | Surfeit locus 1 cytochrome c oxidase biogenesis protein | chr3:6133581-6136053 FORWARD LENGTH=354	AT3G17910.1	AT3G17910.1		9	9	9	33.1	33.1	33.1	39.921	0	106.63	712720000	55	20.8814	20.9252	20.9365	21.0059	20.4401	20.3228	20.3656	20.1329
4.29146	-0.622329	AT5G13610.1 | Symbols: | Protein of unknown function (DUF155) | chr5:4383073-4384808 FORWARD LENGTH=402	AT5G13610.1	AT5G13610.1		7	7	7	24.4	24.4	24.4	46.2	0	203.24	765710000	47	20.8684	20.9565	20.8328	20.8822	20.2696	20.3995	20.251	20.1306
1.79459	-0.622428	AT5G50920.1 | Symbols: CLPC, ATHSP93-V, HSP93-V, DCA1, CLPC1 | CLPC homologue 1 | chr5:20715710-20719800 REVERSE LENGTH=929	AT5G50920.1;AT3G45450.1	AT5G50920.1		75	32	32	69.9	34.7	34.7	103.45	0	323.31	4281200000	265	20.8545	20.5762	21.148	21.0334	20.6962	20.0872	20.1432	20.1957
2.9639	-0.622602	AT4G03240.1 | Symbols: ATFH, FH | frataxin homolog | chr4:1423685-1424758 REVERSE LENGTH=187	AT4G03240.1	AT4G03240.1		5	5	5	23	23	23	21.43	0	28.748	299860000	27	21.0697	20.9188	20.969	21.1354	20.6822	20.3313	20.2974	20.2915
2.54714	-0.624329	AT3G62720.1 | Symbols: ATXT1, XT1, XXT1 | xylosyltransferase 1 | chr3:23201326-23202708 FORWARD LENGTH=460;AT3G62720.2 | Symbols: ATXT1, XT1, XXT1 | xylosyltransferase 1 | chr3:23201326-23202708 FORWARD LENGTH=460	AT3G62720.1;AT3G62720.2;AT4G02500.1	AT3G62720.1;AT3G62720.2		7	7	7	22.8	22.8	22.8	53.381	0	50.144	337070000	26	20.8346	21.1851	21.2849	20.819	20.4248	20.4334	20.2731	20.4951
2.09537	-0.624893	AT1G48520.1 | Symbols: GATB | GLU-ADT subunit B | chr1:17940185-17942540 FORWARD LENGTH=550;AT1G48520.2 | Symbols: GATB | GLU-ADT subunit B | chr1:17940185-17942075 FORWARD LENGTH=475;AT1G48520.3 | Symbols: GATB | GLU-ADT subunit B | chr1:17940185-17942272	AT1G48520.1;AT1G48520.2;AT1G48520.3	AT1G48520.1;AT1G48520.2;AT1G48520.3		13	13	13	38.2	38.2	38.2	60.94	0	58.759	354520000	57	20.9175	20.8256	21.1479	20.942	19.9464	20.2764	20.5246	20.586
1.95162	-0.624908	AT1G20760.1 | Symbols: | Calcium-binding EF hand family protein | chr1:7209515-7214773 FORWARD LENGTH=1019	AT1G20760.1	AT1G20760.1		11	11	9	14.5	14.5	13.5	109.82	0	51.381	246060000	50	20.6215	20.8481	21.1774	20.9629	20.5054	20.3963	20.2935	19.9151
2.56173	-0.625318	AT3G60660.1 | Symbols: | unknown protein;CONTAINS InterPro DOMAIN/s: Protein of unknown function DUF1395 (InterPro:IPR009829);Has 131 Blast hits to 131 proteins in 44 species: Archae - 0;Bacteria - 0;Metazoa - 83;Fungi - 0;Plants - 45;Viruses - 0;	AT3G60660.1	AT3G60660.1		7	7	7	47.1	47.1	47.1	30.399	0	55.027	345360000	46	20.9245	21.1158	21.1645	20.9076	20.3035	20.7319	20.2773	20.2984
2.50829	-0.625842	AT1G79830.3 | Symbols: GC5 | golgin candidate 5 | chr1:30028110-30033508 REVERSE LENGTH=956;AT1G79830.2 | Symbols: GC5 | golgin candidate 5 | chr1:30028110-30033508 REVERSE LENGTH=956;AT1G79830.1 | Symbols: GC5 | golgin candidate 5 | chr1:30028110-30033508	AT1G79830.3;AT1G79830.2;AT1G79830.1;AT1G79830.4	AT1G79830.3;AT1G79830.2;AT1G79830.1;AT1G79830.4		18	18	18	25.7	25.7	25.7	108.35	0	76.116	319840000	79	20.9721	20.8307	21.2219	21.0904	20.5538	20.4796	20.4745	20.1038
2.41459	-0.626363	AT2G30920.1 | Symbols: ATCOQ3, EMB3002, COQ3 | coenzyme Q 3 | chr2:13157409-13159824 REVERSE LENGTH=322	AT2G30920.1	AT2G30920.1		14	14	14	64.6	64.6	64.6	35.332	0	280.47	1948200000	117	21.0923	20.853	21.2991	20.8871	20.6385	20.462	20.2716	20.254
2.73765	-0.627649	AT1G30680.1 | Symbols: | toprim domain-containing protein | chr1:10881665-10886060 FORWARD LENGTH=709	AT1G30680.1	AT1G30680.1		13	13	13	23.3	23.3	23.3	80.402	0	155.08	327320000	48	20.8906	20.8134	21.2333	21.1616	20.4974	20.3975	20.4654	20.2279
1.98981	-0.628153	AT1G48200.1 | Symbols: | unknown protein;FUNCTIONS IN: molecular_function unknown;INVOLVED IN: biological_process unknown;LOCATED IN: endomembrane system;EXPRESSED IN: 22 plant structures;EXPRESSED DURING: 13 growth stages;Has 30 Blast hits to 30 pr	AT1G48200.1	AT1G48200.1		7	7	7	39	39	39	12.866	0	75.114	1112800000	62	20.4962	21.1005	21.1421	20.9014	20.3601	20.4413	20.2792	20.0469
1.45274	-0.628283	AT3G14390.1 | Symbols: | Pyridoxal-dependent decarboxylase family protein | chr3:4806771-4808954 FORWARD LENGTH=484	AT3G14390.1	AT3G14390.1		21	4	4	43	11.6	11.6	53.557	0	51.816	465230000	42	20.8264	20.854	21.4218	21.0406	20.9573	20.2216	20.3188	20.132
3.34078	-0.629186	AT5G65560.1 | Symbols: | Pentatricopeptide repeat (PPR) superfamily protein | chr5:26201012-26203759 REVERSE LENGTH=915	AT5G65560.1	AT5G65560.1		5	5	5	8.4	8.4	8.4	103.54	0	13.4	66270000	18	20.7986	20.897	20.9705	20.9179	20.3602	20.4422	20.1976	20.0672
2.11926	-0.629319	AT5G05730.1 | Symbols: ASA1, TRP5, AMT1, WEI2, JDL1 | anthranilate synthase alpha subunit 1 | chr5:1719740-1722811 REVERSE LENGTH=595;AT5G05730.2 | Symbols: ASA1 | anthranilate synthase alpha subunit 1 | chr5:1719740-1722811 REVERSE LENGTH=624	AT5G05730.1;AT5G05730.2	AT5G05730.1;AT5G05730.2		17	17	15	41.7	41.7	39.5	66.311	0	133.8	602410000	94	21.0095	20.9055	21.2264	21.0906	20.7209	20.6199	20.2637	20.1102
2.24541	-0.629489	AT1G47750.1 | Symbols: PEX11A | peroxin 11A | chr1:17569388-17570134 REVERSE LENGTH=248	AT1G47750.1	AT1G47750.1		6	6	6	30.6	30.6	30.6	27.677	0	81.744	356550000	30	21.2428	20.832	20.9404	21.0824	20.1784	20.6865	20.4981	20.2165
1.85699	-0.629713	AT3G05970.1 | Symbols: LACS6, ATLACS6 | long-chain acyl-CoA synthetase 6 | chr3:1786510-1791746 REVERSE LENGTH=701	AT3G05970.1	AT3G05970.1		28	27	27	44.9	44.9	44.9	76.603	0	323.31	3839400000	168	20.9278	20.8041	21.2519	20.953	20.5542	20.3401	20.6067	19.9169
3.30718	-0.631598	AT1G61980.1 | Symbols: | Mitochondrial transcription termination factor family protein | chr1:22908162-22909418 FORWARD LENGTH=418	AT1G61980.1	AT1G61980.1		7	7	7	23.7	23.7	23.7	47.236	0	70.133	350270000	36	21.0508	20.8715	20.8375	20.7677	20.058	20.3708	20.3392	20.233
1.88707	-0.63215	AT5G27660.1 | Symbols: | Trypsin family protein with PDZ domain | chr5:9789835-9792235 REVERSE LENGTH=428	AT5G27660.1	AT5G27660.1		3	3	3	14	14	14	46.031	0	54.211	203990000	18	20.7145	20.8556	21.2433	20.6299	20.4425	20.4286	19.997	20.0467
2.55346	-0.632443	AT3G46060.3 | Symbols: ARA3 | RAB GTPase homolog 8A | chr3:16917908-16919740 FORWARD LENGTH=216;AT3G46060.2 | Symbols: ARA3 | RAB GTPase homolog 8A | chr3:16917908-16919740 FORWARD LENGTH=216;AT3G46060.1 | Symbols: ARA3, ARA-3, ATRABE1C, ATRAB8A, RAB8A | R	AT3G46060.3;AT3G46060.2;AT3G46060.1	AT3G46060.3;AT3G46060.2;AT3G46060.1		14	2	2	65.3	13	13	23.835	0	77.072	446850000	33	21.061	20.7952	20.9443	20.9154	20.4001	20.5121	20.3081	19.9658
2.4505	-0.632532	AT3G53230.1 | Symbols: | ATPase, AAA-type, CDC48 protein | chr3:19723416-19726489 FORWARD LENGTH=815	AT3G53230.1	AT3G53230.1		52	4	4	58.2	11.8	11.8	90.339	0	111.34	238850000	27	20.8832	20.8064	21.2063	20.8466	20.3676	20.5542	20.1972	20.0932
2.70455	-0.632993	AT4G31460.1 | Symbols: | Ribosomal L28 family | chr4:15259773-15260847 REVERSE LENGTH=212	AT4G31460.1	AT4G31460.1		9	9	9	43.9	43.9	43.9	24.065	0	28.151	491540000	36	21.1935	20.892	21.0469	20.8486	20.3762	20.5644	20.1167	20.3917
1.81872	-0.633255	AT4G17650.1 | Symbols: | Polyketide cyclase / dehydrase and lipid transport protein | chr4:9827749-9829443 FORWARD LENGTH=256	AT4G17650.1	AT4G17650.1		7	7	7	35.9	35.9	35.9	29.034	0	65.334	254790000	33	20.9472	20.6061	21.115	21.4847	20.5106	20.3838	20.2916	20.434
2.09374	-0.633277	AT4G05020.2 | Symbols: NDB2 | NAD(P)H dehydrogenase B2 | chr4:2572752-2576222 FORWARD LENGTH=619;AT4G05020.1 | Symbols: NDB2 | NAD(P)H dehydrogenase B2 | chr4:2572752-2576222 FORWARD LENGTH=582	AT4G05020.2;AT4G05020.1;AT4G21490.1	AT4G05020.2;AT4G05020.1		25	25	25	49.4	49.4	49.4	69.242	0	323.31	4439600000	217	20.7302	20.8384	21.1383	21.0177	20.4145	20.1054	20.0487	20.6228
2.12058	-0.633441	AT5G08120.1 | Symbols: MPB2C | movement protein binding protein 2C | chr5:2600743-2602678 REVERSE LENGTH=326	AT5G08120.1	AT5G08120.1		9	9	9	33.7	33.7	33.7	37.348	0	30.195	154840000	31	20.7983	20.8465	21.1644	21.0494	20.6232	20.4795	20.0205	20.2015
2.36733	-0.634081	AT5G45590.1 | Symbols: | Ribosomal protein L35 | chr5:18484643-18486227 REVERSE LENGTH=173	AT5G45590.1	AT5G45590.1		4	4	4	25.4	25.4	25.4	20.062	0	16.136	2092000000	25	20.8049	20.8433	20.9766	21.1886	20.4234	20.4748	20.3945	19.9845
2.23486	-0.636258	AT4G32605.1 | Symbols: | Mitochondrial glycoprotein family protein | chr4:15726429-15727864 REVERSE LENGTH=227	AT4G32605.1	AT4G32605.1		17	17	17	63.4	63.4	63.4	25.17	0	323.31	7145300000	206	20.9156	21.0604	21.3272	20.9081	20.5535	20.6429	20.1184	20.3516
2.38163	-0.638031	AT5G52370.1 | Symbols: | unknown protein;BEST Arabidopsis thaliana protein match is: unknown protein (TAIR:AT5G58990.1);Has 30201 Blast hits to 17322 proteins in 780 species: Archae - 12;Bacteria - 1396;Metazoa - 17338;Fungi - 3422;Plants - 5037;Vi	AT5G52370.1;AT5G58990.1	AT5G52370.1;AT5G58990.1		5	5	5	40.8	40.8	40.8	15.763	0	21.77	355700000	27	20.9604	21.2015	20.9854	21.0239	20.751	20.1825	20.2207	20.4649
2.89814	-0.638481	AT4G18810.1 | Symbols: | NAD(P)-binding Rossmann-fold superfamily protein | chr4:10322622-10325735 REVERSE LENGTH=596;AT4G18810.2 | Symbols: | NAD(P)-binding Rossmann-fold superfamily protein | chr4:10322263-10325735 REVERSE LENGTH=627	AT4G18810.1;AT4G18810.2	AT4G18810.1;AT4G18810.2		12	12	12	27.2	27.2	27.2	65.467	0	28.833	416850000	52	21.045	20.7086	20.9255	21.2023	20.2908	20.2778	20.4559	20.3031
3.46155	-0.63902	AT4G29430.1 | Symbols: rps15ae | ribosomal protein S15A E | chr4:14472440-14473383 FORWARD LENGTH=129	AT4G29430.1	AT4G29430.1		9	9	8	70.5	70.5	64.3	14.916	0	79.23	1060000000	66	20.9439	20.858	21.0325	21.0042	20.5095	20.3558	20.289	20.1282
3.15371	-0.639107	AT5G48580.1 | Symbols: FKBP15-2 | FK506- and rapamycin-binding protein 15 kD-2 | chr5:19696156-19697304 REVERSE LENGTH=163	AT5G48580.1	AT5G48580.1		7	7	5	44.8	44.8	44.8	17.658	0	34.335	406080000	42	20.9975	21.0764	21.1181	21.0021	20.6402	20.4346	20.3902	20.1726
1.93787	-0.640881	AT2G29700.1 | Symbols: ATPH1, PH1 | pleckstrin homologue 1 | chr2:12697571-12698008 FORWARD LENGTH=145	AT2G29700.1	AT2G29700.1		3	3	3	33.8	33.8	33.8	16.811	0	37.38	227210000	20	20.5541	21.0232	20.8865	20.784	19.8054	20.5145	20.2646	20.0998
1.85143	-0.641019	AT3G22845.1 | Symbols: | emp24/gp25L/p24 family/GOLD family protein | chr3:8087373-8088550 FORWARD LENGTH=214	AT3G22845.1	AT3G22845.1		3	3	3	13.6	13.6	13.6	24.281	0	37.948	704830000	40	20.8375	20.9526	21.0242	21.0601	20.4815	20.757	19.9539	20.1179
2.64061	-0.641299	AT2G37410.2 | Symbols: ATTIM17-2, TIM17, TIM17-2 | translocase inner membrane subunit 17-2 | chr2:15698119-15698850 REVERSE LENGTH=243;AT2G37410.1 | Symbols: ATTIM17-2, TIM17, TIM17-2 | translocase inner membrane subunit 17-2 | chr2:15698119-15698850 REVER	AT2G37410.2;AT2G37410.1	AT2G37410.2;AT2G37410.1		6	6	6	37	37	37	25.571	0	93.256	742940000	33	21.2237	21.1183	21.1159	20.9347	20.6341	20.654	20.3345	20.2047
3.40614	-0.641534	AT4G27060.1 | Symbols: TOR1, SPR2, CN | ARM repeat superfamily protein | chr4:13581581-13585070 REVERSE LENGTH=864	AT4G27060.1;AT1G50890.1	AT4G27060.1		8	8	8	14.8	14.8	14.8	94.003	0	43.021	202240000	33	21.0184	21.141	21.237	20.9179	20.5778	20.392	20.4704	20.308
2.22498	-0.642839	AT2G23370.1 | Symbols: | unknown protein;BEST Arabidopsis thaliana protein match is: unknown protein (TAIR:AT4G34090.1);Has 73 Blast hits to 73 proteins in 21 species: Archae - 0;Bacteria - 0;Metazoa - 0;Fungi - 0;Plants - 65;Viruses - 0;Other Euk	AT2G23370.1	AT2G23370.1		18	18	18	63.5	63.5	63.5	38.039	0	287.87	1647100000	148	20.9435	20.6523	20.9665	21.0699	20.1373	20.3552	20.5717	19.9967
2.06135	-0.645503	AT4G25280.1 | Symbols: | P-loop containing nucleoside triphosphate hydrolases superfamily protein | chr4:12939068-12940723 REVERSE LENGTH=249	AT4G25280.1	AT4G25280.1		11	10	10	48.2	45	45	27.834	0	91.596	717070000	51	20.9841	20.7662	21.3895	20.7507	20.4061	20.4799	20.3088	20.1136
2.87185	-0.645557	AT1G07830.1 | Symbols: | ribosomal protein L29 family protein | chr1:2422549-2423392 FORWARD LENGTH=144	AT1G07830.1	AT1G07830.1		10	10	10	63.2	63.2	63.2	16.886	0	121.88	1170800000	70	20.9789	20.7782	21.2031	20.9555	20.4865	20.2664	20.158	20.4228
2.19584	-0.645846	AT5G13650.1 | Symbols: | elongation factor family protein | chr5:4397821-4402364 FORWARD LENGTH=675;AT5G13650.2 | Symbols: | elongation factor family protein | chr5:4397821-4402364 FORWARD LENGTH=676	AT5G13650.1;AT5G13650.2	AT5G13650.1;AT5G13650.2		20	20	20	50.7	50.7	50.7	74.314	0	323.31	1575700000	139	21.0931	20.7209	21.0988	21.0685	20.5818	20.4422	20.389	19.9848
2.66976	-0.645861	AT2G25140.1 | Symbols: HSP98.7, CLPB-M, CLPB4 | casein lytic proteinase B4 | chr2:10697877-10701998 REVERSE LENGTH=964	AT2G25140.1	AT2G25140.1		66	65	63	66.9	66.9	65.9	108.66	0	323.31	4697900000	391	21.3019	20.853	20.7684	20.9841	20.2981	20.2571	20.3043	20.4645
2.69232	-0.646329	AT4G05400.2 | Symbols: | copper ion binding | chr4:2741256-2742008 FORWARD LENGTH=250;AT4G05400.1 | Symbols: | copper ion binding | chr4:2741256-2742008 FORWARD LENGTH=250	AT4G05400.2;AT4G05400.1	AT4G05400.2;AT4G05400.1		23	23	23	66.8	66.8	66.8	27.627	0	323.31	3411300000	190	20.6557	20.9655	21.0518	21.1548	20.325	20.2393	20.4807	20.1975
1.62633	-0.648255	AT5G47840.1 | Symbols: AMK2 | adenosine monophosphate kinase | chr5:19375488-19378058 FORWARD LENGTH=283	AT5G47840.1	AT5G47840.1		3	3	3	15.9	15.9	15.9	31.451	0	13.106	124720000	24	20.9007	21.0502	21.0713	20.6916	20.2609	20.6342	20.4884	19.7373
1.06241	-0.648867	AT3G62530.1 | Symbols: | ARM repeat superfamily protein | chr3:23132219-23133121 FORWARD LENGTH=221	AT3G62530.1	AT3G62530.1		28	28	28	76.5	76.5	76.5	24.503	0	323.31	59582000000	678	23.5394	23.5882	23.7447	24.3622	22.4493	23.2601	23.6563	23.2733
1.30243	-0.649429	AT3G52150.2 | Symbols: | RNA-binding (RRM/RBD/RNP motifs) family protein | chr3:19342074-19343090 FORWARD LENGTH=253;AT3G52150.1 | Symbols: | RNA-binding (RRM/RBD/RNP motifs) family protein | chr3:19342074-19343090 FORWARD LENGTH=253	AT3G52150.2;AT3G52150.1	AT3G52150.2;AT3G52150.1		12	12	12	45.1	45.1	45.1	27.748	0	62.716	498300000	70	20.763	20.4357	21.2307	21.3457	20.7684	20.1711	20.0577	20.1802
1.07583	-0.650648	AT3G45970.1 | Symbols: ATEXLA1, EXPL1, ATEXPL1, ATHEXP BETA 2.1, EXLA1 | expansin-like A1 | chr3:16896238-16897189 FORWARD LENGTH=265	AT3G45970.1	AT3G45970.1		16	16	15	80	80	75.5	28.702	0	323.31	23149000000	369	27.3013	27.2034	27.7979	27.17	26.1708	27.4305	26.3999	26.8688
2.67107	-0.651157	AT1G18630.1 | Symbols: GR-RBP6 | glycine-rich RNA-binding protein 6 | chr1:6415226-6416283 FORWARD LENGTH=155	AT1G18630.1	AT1G18630.1		12	12	12	83.2	83.2	83.2	15.96	0	301.1	1600800000	105	20.8641	21.2372	20.8236	20.9914	20.3419	20.5262	20.3364	20.1072
2.69856	-0.651681	AT3G53560.1 | Symbols: | Tetratricopeptide repeat (TPR)-like superfamily protein | chr3:19859954-19860976 REVERSE LENGTH=340	AT3G53560.1	AT3G53560.1		7	7	6	31.2	31.2	29.1	38.664	0	20.229	303330000	50	20.7832	21.0469	20.9811	21.1266	20.4347	20.2814	20.541	20.074
1.55581	-0.6519	AT1G20510.1 | Symbols: OPCL1 | OPC-8:0 CoA ligase1 | chr1:7103645-7105856 REVERSE LENGTH=546;AT1G20510.2 | Symbols: OPCL1 | OPC-8:0 CoA ligase1 | chr1:7103939-7105856 REVERSE LENGTH=473	AT1G20510.1;AT1G20510.2	AT1G20510.1;AT1G20510.2		19	19	19	46.2	46.2	46.2	59.374	0	323.31	1486600000	105	21.1855	21.0117	20.6216	21.0706	20.4971	20.725	20.215	19.8447
0.810024	-0.653228	AT2G22450.1 | Symbols: | riboflavin biosynthesis protein, putative | chr2:9530654-9532691 FORWARD LENGTH=476	AT2G22450.1	AT2G22450.1		22	22	22	56.3	56.3	56.3	52.199	0	323.31	3079700000	269	20.1839	21.5516	20.949	21.9055	20.6182	20.7696	20.4646	20.1247
2.59973	-0.654087	AT2G39970.1 | Symbols: | Mitochondrial substrate carrier family protein | chr2:16684026-16686392 REVERSE LENGTH=331	AT2G39970.1	AT2G39970.1		13	13	13	45.3	45.3	45.3	36.213	0	323.31	2496200000	99	21.2679	20.8389	21.1339	20.7817	20.3368	20.2445	20.5245	20.3004
2.19509	-0.656556	AT3G63490.1 | Symbols: | Ribosomal protein L1p/L10e family | chr3:23444269-23446020 FORWARD LENGTH=346;AT3G63490.2 | Symbols: | Ribosomal protein L1p/L10e family | chr3:23444269-23445777 FORWARD LENGTH=291	AT3G63490.1;AT3G63490.2	AT3G63490.1;AT3G63490.2		4	4	4	26	26	26	37.632	0	17.455	337570000	30	20.8923	20.8663	21.0528	21.1068	20.6404	20.431	20.2882	19.9324
2.04262	-0.656589	AT3G49560.1 | Symbols: | Mitochondrial import inner membrane translocase subunit Tim17/Tim22/Tim23 family protein | chr3:18370644-18371821 FORWARD LENGTH=261	AT3G49560.1	AT3G49560.1		9	8	8	41.8	38.7	38.7	27.982	0	158.61	777310000	71	20.77	20.9381	21.0959	20.95	20.7583	20.1142	20.1721	20.083
2.43614	-0.65822	AT2G22360.1 | Symbols: | DNAJ heat shock family protein | chr2:9498162-9500459 FORWARD LENGTH=442	AT2G22360.1	AT2G22360.1		7	7	3	18.1	18.1	11.3	47.761	0	18.33	485000000	37	20.896	21.1802	21.1489	21.2582	20.36	20.7207	20.5874	20.1825
3.98497	-0.658876	AT1G02150.1 | Symbols: | Tetratricopeptide repeat (TPR)-like superfamily protein | chr1:408779-410433 FORWARD LENGTH=524	AT1G02150.1	AT1G02150.1		9	9	9	24.2	24.2	24.2	59.882	0	23.179	144780000	26	21.1625	21.0058	21.1575	20.9264	20.5164	20.3875	20.4099	20.3028
3.70569	-0.659287	AT1G14620.1 | Symbols: DECOY | decoy | chr1:5014948-5016501 REVERSE LENGTH=233;AT1G14620.2 | Symbols: DECOY | decoy | chr1:5014985-5016501 REVERSE LENGTH=220	AT1G14620.1;AT1G14620.2	AT1G14620.1;AT1G14620.2		11	11	11	52.8	52.8	52.8	27.14	0	53.265	1124000000	64	20.8971	20.9019	20.9848	20.9398	20.373	20.4281	20.2042	20.0812
1.89453	-0.660429	AT5G26570.1 | Symbols: PWD, OK1, ATGWD3 | catalytics;carbohydrate kinases;phosphoglucan, water dikinases | chr5:9261580-9267526 FORWARD LENGTH=1196;AT5G26570.2 | Symbols: PWD, OK1, ATGWD3 | catalytics;carbohydrate kinases;phosphoglucan, water dikinases | c	AT5G26570.1;AT5G26570.2	AT5G26570.1;AT5G26570.2		29	29	29	36.4	36.4	36.4	131.32	0	169.17	858650000	109	21.1455	21.0271	21.1317	20.5673	20.3014	20.404	20.5706	19.9538
1.92801	-0.660679	AT3G27930.1 | Symbols: | unknown protein;FUNCTIONS IN: molecular_function unknown;INVOLVED IN: N-terminal protein myristoylation;LOCATED IN: cellular_component unknown;EXPRESSED IN: 23 plant structures;EXPRESSED DURING: 14 growth stages;Has 35 Blast	AT3G27930.1;AT3G27930.2	AT3G27930.1;AT3G27930.2		6	6	6	22.6	22.6	22.6	47.196	0	31.788	247690000	24	21.268	20.83	21.2887	20.8476	20.5818	20.6355	20.0481	20.3261
1.89851	-0.661039	AT2G42490.1 | Symbols: | Copper amine oxidase family protein | chr2:17691600-17695526 REVERSE LENGTH=776	AT2G42490.1	AT2G42490.1		35	35	35	60.7	60.7	60.7	86.69	0	323.31	3002400000	202	21.0215	20.8253	21.2647	21.0432	20.6157	20.5275	20.4784	19.889
1.93787	-0.661047	AT1G51390.1 | Symbols: NFU5, ATNFU1 | NFU domain protein 5 | chr1:19050427-19051753 FORWARD LENGTH=275	AT1G51390.1	AT1G51390.1		11	11	9	47.3	47.3	41.5	29.971	0	298.87	3926600000	137	21.1704	20.858	21.1119	20.8451	20.8115	20.183	20.2717	20.075
2.34812	-0.661758	AT3G48540.1 | Symbols: | Cytidine/deoxycytidylate deaminase family protein | chr3:17989798-17992015 REVERSE LENGTH=232	AT3G48540.1	AT3G48540.1		3	3	3	23.7	23.7	23.7	25.858	0	32.463	110690000	19	21.0904	20.6636	21.0554	21.106	20.5809	20.3969	20.1623	20.1283
1.0396	-0.662529	AT5G08300.1 | Symbols: | Succinyl-CoA ligase, alpha subunit | chr5:2667579-2669672 FORWARD LENGTH=347	AT5G08300.1	AT5G08300.1		22	22	10	58.2	58.2	23.3	36.151	0	323.31	38355000000	544	23.2631	23.7727	23.3842	24.5264	22.76	22.8226	23.2867	23.427
3.11258	-0.662865	AT2G31240.1 | Symbols: | Tetratricopeptide repeat (TPR)-like superfamily protein | chr2:13317570-13319518 REVERSE LENGTH=617	AT2G31240.1	AT2G31240.1		22	22	22	49.8	49.8	49.8	68.744	0	233.9	897560000	107	21.211	20.9368	21.1882	20.8869	20.4016	20.4823	20.4806	20.2071
1.95533	-0.662918	AT5G61810.2 | Symbols: | Mitochondrial substrate carrier family protein | chr5:24831843-24833002 REVERSE LENGTH=335;AT5G61810.1 | Symbols: | Mitochondrial substrate carrier family protein | chr5:24831843-24833735 REVERSE LENGTH=478	AT5G61810.2;AT5G61810.1	AT5G61810.2;AT5G61810.1		10	9	9	39.4	36.4	36.4	36.611	0	52.325	231740000	26	20.6965	21.0902	21.2895	21.052	20.5865	20.6146	20.1871	20.0883
1.52636	-0.663765	AT1G68790.1 | Symbols: LINC3 | little nuclei3 | chr1:25834932-25839157 REVERSE LENGTH=1085	AT1G68790.1	AT1G68790.1		10	10	10	11.8	11.8	11.8	127.2	0	17.168	134630000	18	21.8076	20.8538	21.0002	20.9714	20.7121	20.5182	20.3168	20.4307
2.35444	-0.664076	AT5G56650.1 | Symbols: ILL1 | IAA-leucine resistant (ILR)-like 1 | chr5:22930825-22932488 FORWARD LENGTH=438	AT5G56650.1	AT5G56650.1		14	14	13	54.6	54.6	49.8	47.691	0	71.807	454860000	66	20.9277	20.7459	21.1155	21.1475	20.4435	20.2551	20.5598	20.022
2.04557	-0.664979	AT2G25080.1 | Symbols: ATGPX1, GPX1 | glutathione peroxidase 1 | chr2:10668134-10669828 FORWARD LENGTH=236	AT2G25080.1	AT2G25080.1		4	4	3	28.8	28.8	20.3	26.015	0	18.781	387590000	25	20.965	20.867	21.1778	20.8266	20.4168	20.5735	20.3384	19.8478
2.50324	-0.665228	AT1G11390.1 | Symbols: | Protein kinase superfamily protein | chr1:3834762-3837305 REVERSE LENGTH=624	AT1G11390.1;AT1G61640.1	AT1G11390.1		3	3	3	9	9	9	70.592	0	36.072	102960000	13	20.7164	20.804	20.9501	21.2056	20.4219	20.3527	20.0114	20.2292
2.61052	-0.66542	AT1G67350.2 | Symbols: | unknown protein;FUNCTIONS IN: molecular_function unknown;INVOLVED IN: photorespiration;LOCATED IN: mitochondrial membrane, mitochondrial respiratory chain complex I, respiratory chain complex I;EXPRESSED IN: 24 plant structure	AT1G67350.2;AT1G67350.1	AT1G67350.2;AT1G67350.1		11	11	11	95.9	95.9	95.9	11.791	0	228.01	4966800000	174	20.9881	20.6349	21.2261	21.0336	20.4315	20.2648	20.1951	20.3296
1.83521	-0.665547	AT3G45300.1 | Symbols: IVD, ATIVD, IVDH | isovaleryl-CoA-dehydrogenase | chr3:16621659-16624848 REVERSE LENGTH=409	AT3G45300.1	AT3G45300.1		16	16	16	66	66	66	44.773	0	153.9	889270000	60	21.1082	20.8324	21.1122	21.2979	20.7245	20.4226	19.9436	20.5978
3.08295	-0.66562	AT1G31817.1 | Symbols: NFD3 | Ribosomal L18p/L5e family protein | chr1:11414932-11416356 REVERSE LENGTH=314	AT1G31817.1	AT1G31817.1		15	15	15	45.2	45.2	45.2	33.926	0	270.9	1727500000	114	20.864	20.9885	21.2289	21.2829	20.5414	20.3674	20.3586	20.4345
2.83564	-0.665731	AT1G80380.3 | Symbols: | P-loop containing nucleoside triphosphate hydrolases superfamily protein | chr1:30217895-30219784 FORWARD LENGTH=364;AT1G80380.4 | Symbols: | P-loop containing nucleoside triphosphate hydrolases superfamily protein | chr1:3021733	AT1G80380.3;AT1G80380.4;AT1G80380.2;AT1G80380.1	AT1G80380.3;AT1G80380.4;AT1G80380.2;AT1G80380.1		9	9	9	41.2	41.2	41.2	40.819	0	117.81	342800000	35	20.8727	20.8033	21.2255	21.0435	20.3044	20.4291	20.4326	20.116
2.78183	-0.665977	AT4G33520.2 | Symbols: PAA1, HMA6 | P-type ATP-ase 1 | chr4:16118993-16125849 FORWARD LENGTH=949;AT4G33520.3 | Symbols: PAA1, HMA6 | P-type ATP-ase 1 | chr4:16118993-16125849 FORWARD LENGTH=949	AT4G33520.2;AT4G33520.3;AT4G33520.1	AT4G33520.2;AT4G33520.3		16	16	16	33.8	33.8	33.8	99.996	0	152.89	591250000	65	20.8266	20.9095	20.8495	21.1907	20.445	20.4225	20.1294	20.1155
1.49967	-0.666951	AT2G20990.1 | Symbols: SYTA, NTMC2TYPE1.1, ATSYTA, NTMC2T1.1, SYT1 | synaptotagmin A | chr2:9014827-9017829 FORWARD LENGTH=541;AT2G20990.2 | Symbols: SYTA | synaptotagmin A | chr2:9014827-9017829 FORWARD LENGTH=565;AT2G20990.3 | Symbols: SYTA | synaptotagm	AT2G20990.1;AT2G20990.2;AT2G20990.3;AT2G21010.1	AT2G20990.1;AT2G20990.2;AT2G20990.3		25	25	25	58.4	58.4	58.4	61.743	0	233.61	1719200000	122	20.7311	21.4002	21.02	20.9864	20.8965	20.4292	20.0648	20.0794
2.31057	-0.667012	AT2G19860.1 | Symbols: ATHXK2, HXK2 | hexokinase 2 | chr2:8570818-8573762 FORWARD LENGTH=502;AT2G19860.2 | Symbols: ATHXK2, HXK2 | hexokinase 2 | chr2:8571949-8573762 FORWARD LENGTH=393	AT2G19860.1;AT2G19860.2	AT2G19860.1;AT2G19860.2		15	8	8	39	28.7	28.7	54.489	0	129.92	441230000	55	20.5995	20.9554	21.0218	21.1168	20.5461	20.2458	20.1789	20.0546
2.18822	-0.667134	AT4G01660.1 | Symbols: ATABC1, ATATH10, ABC1 | ABC transporter 1 | chr4:708652-711095 FORWARD LENGTH=623	AT4G01660.1	AT4G01660.1		35	35	35	72.4	72.4	72.4	68.627	0	309.24	2255600000	169	20.9243	20.7904	21.2252	20.7999	20.5316	20.4297	19.9824	20.1276
3.13286	-0.667774	AT4G36680.1 | Symbols: | Tetratricopeptide repeat (TPR)-like superfamily protein | chr4:17292479-17293717 REVERSE LENGTH=412	AT4G36680.1	AT4G36680.1		22	22	22	67.2	67.2	67.2	46.547	0	323.31	2926600000	188	20.9855	20.6797	20.9426	20.9741	20.3189	20.3065	19.9975	20.288
2.66865	-0.668778	AT1G77140.1 | Symbols: VPS45, ATVPS45 | vacuolar protein sorting 45 | chr1:28984163-28987681 FORWARD LENGTH=569	AT1G77140.1	AT1G77140.1		11	11	11	24.1	24.1	24.1	64.941	0	42.356	209700000	46	21.1753	20.7199	21.2349	20.9155	20.2818	20.4734	20.3758	20.2395
1.9661	-0.668905	AT5G08040.1 | Symbols: TOM5 | mitochondrial import receptor subunit TOM5 homolog | chr5:2577358-2578073 REVERSE LENGTH=54	AT5G08040.1	AT5G08040.1		6	6	6	90.7	90.7	90.7	6.0912	0	39.012	1745700000	57	21.1039	20.5499	21.1026	21.065	20.5056	20.3492	20.361	19.9299
2.75178	-0.669106	AT2G15690.1 | Symbols: | Tetratricopeptide repeat (TPR)-like superfamily protein | chr2:6831855-6833594 REVERSE LENGTH=579	AT2G15690.1	AT2G15690.1		13	13	13	34.2	34.2	34.2	65.613	0	233.07	1327100000	107	21.1774	21.0728	21.0983	20.6808	20.2434	20.4223	20.4546	20.2327
0.686954	-0.669531	AT3G42790.1 | Symbols: AL3 | alfin-like 3 | chr3:14878128-14879618 REVERSE LENGTH=250	AT3G42790.1	AT3G42790.1		2	2	2	8.4	8.4	8.4	28.214	0	19.747	94068000	27	22.2139	20.9235	21.0792	22.5249	20.501	20.6963	21.54	21.3261
1.93694	-0.669672	AT5G15610.2 | Symbols: | Proteasome component (PCI) domain protein | chr5:5079579-5081929 FORWARD LENGTH=413;AT5G15610.1 | Symbols: | Proteasome component (PCI) domain protein | chr5:5079579-5081929 FORWARD LENGTH=442	AT5G15610.2;AT5G15610.1	AT5G15610.2;AT5G15610.1		8	8	8	27.8	27.8	27.8	46.418	0	70.251	372480000	36	20.681	20.7643	21.3744	21.187	20.4422	20.4871	20.2848	20.1139
2.31108	-0.669911	AT4G39990.1 | Symbols: ATRABA4B, ATRAB11G, ATGB3, RABA4B | RAB GTPase homolog A4B | chr4:18542722-18543779 FORWARD LENGTH=224	AT4G39990.1;AT3G12160.1	AT4G39990.1		6	4	4	31.7	22.3	22.3	24.406	0	57.476	180950000	24	20.8999	20.9981	21.2282	21.1784	20.6199	20.6436	20.2574	20.1041
1.76325	-0.67162	AT5G26860.1 | Symbols: LON_ARA_ARA, LON1 | lon protease 1 | chr5:9451183-9456631 FORWARD LENGTH=940	AT5G26860.1;AT3G05780.1;AT3G05790.1	AT5G26860.1		46	46	46	55.1	55.1	55.1	103.93	0	323.31	9541000000	436	20.9757	20.8028	20.9407	20.8891	20.5526	20.5704	20.0636	19.7352
2.84205	-0.671817	AT5G15640.1 | Symbols: | Mitochondrial substrate carrier family protein | chr5:5087590-5089677 FORWARD LENGTH=323	AT5G15640.1	AT5G15640.1		17	17	17	63.8	63.8	63.8	34.726	0	283.35	1543400000	121	21.0886	20.7133	21.0099	21.2127	20.4613	20.2703	20.2079	20.3977
1.25605	-0.67272	AT4G38400.1 | Symbols: ATEXLA2, EXPL2, ATEXPL2, ATHEXP BETA 2.2, EXLA2 | expansin-like A2 | chr4:17978675-17979665 REVERSE LENGTH=265	AT4G38400.1	AT4G38400.1		10	10	10	66.8	66.8	66.8	28.642	0	66.009	1097000000	113	24.2304	24.1122	24.6211	24.0859	23.5791	24.2577	23.0158	23.506
1.72848	-0.672821	AT5G46800.1 | Symbols: BOU | Mitochondrial substrate carrier family protein | chr5:18988779-18989810 REVERSE LENGTH=300	AT5G46800.1	AT5G46800.1		19	19	19	60.7	60.7	60.7	31.022	0	323.31	4461100000	191	20.9607	20.6522	21.2308	20.6954	20.6817	20.0588	19.9485	20.159
2.23085	-0.67403	AT2G19680.2 | Symbols: | Mitochondrial ATP synthase subunit G protein | chr2:8501865-8502622 FORWARD LENGTH=122;AT2G19680.1 | Symbols: | Mitochondrial ATP synthase subunit G protein | chr2:8501865-8502622 FORWARD LENGTH=122	AT2G19680.2;AT2G19680.1	AT2G19680.2;AT2G19680.1		7	6	6	46.7	39.3	39.3	13.847	0	162.98	902410000	47	20.9277	20.7449	21.3779	20.9836	20.5382	20.362	20.0936	20.3441
3.24621	-0.674118	AT1G11090.1 | Symbols: | alpha/beta-Hydrolases superfamily protein | chr1:3702655-3703629 FORWARD LENGTH=324	AT1G11090.1	AT1G11090.1		7	7	7	25.6	25.6	25.6	36.561	0	11.644	102900000	27	21.0168	21.2421	21.1884	20.8884	20.5518	20.4519	20.2608	20.3748
0.784328	-0.674122	AT3G53890.2 | Symbols: | Ribosomal protein S21e | chr3:19955582-19956049 REVERSE LENGTH=82;AT3G53890.1 | Symbols: | Ribosomal protein S21e | chr3:19955582-19956049 REVERSE LENGTH=82	AT3G53890.2;AT3G53890.1	AT3G53890.2;AT3G53890.1		6	6	3	84.1	84.1	64.6	9.0741	0	323.31	5642800000	173	27.0285	26.8096	26.7954	27.3405	25.2517	27.0517	26.8382	26.1359
1.89424	-0.674271	AT4G39460.2 | Symbols: SAMC1 | S-adenosylmethionine carrier 1 | chr4:18356093-18358596 REVERSE LENGTH=325;AT4G39460.1 | Symbols: SAMC1, SAMT1 | S-adenosylmethionine carrier 1 | chr4:18356093-18358596 REVERSE LENGTH=325	AT4G39460.2;AT4G39460.1	AT4G39460.2;AT4G39460.1		5	5	5	30.8	30.8	30.8	34.861	0	56.211	315800000	49	21.0948	20.7973	20.9796	20.7926	20.5663	20.5224	19.8624	20.0162
2.36861	-0.674378	AT1G54990.1 | Symbols: AXR4, RGR, RGR1 | alpha/beta-Hydrolases superfamily protein | chr1:20511565-20513489 FORWARD LENGTH=473	AT1G54990.1	AT1G54990.1		9	9	9	29.4	29.4	29.4	52.419	0	65.157	426810000	38	20.9684	20.8511	20.7795	21.1843	20.475	20.4862	20.1134	20.0112
3.54441	-0.674741	AT5G23120.1 | Symbols: HCF136 | photosystem II stability/assembly factor, chloroplast (HCF136) | chr5:7778154-7780463 FORWARD LENGTH=403	AT5G23120.1	AT5G23120.1		13	13	13	55.3	55.3	55.3	44.103	0	135.08	668440000	93	20.9713	20.9155	20.9179	20.9815	20.463	20.1493	20.0979	20.377
3.83165	-0.674749	AT1G80480.1 | Symbols: PTAC17 | plastid transcriptionally active 17 | chr1:30258272-30260570 REVERSE LENGTH=444	AT1G80480.1	AT1G80480.1		15	15	14	38.1	38.1	35.6	49.487	0	94.734	509780000	66	20.9342	20.6998	21.0416	20.8003	20.1465	20.1925	20.1682	20.2697
2.04968	-0.676547	AT1G59990.1 | Symbols: | DEA(D/H)-box RNA helicase family protein | chr1:22090369-22092885 REVERSE LENGTH=581	AT1G59990.1	AT1G59990.1		9	9	9	29.9	29.9	29.9	64.747	0	159.53	654020000	71	20.8386	21.0578	21.0486	20.7638	20.1162	20.6055	20.4095	19.8713
3.21785	-0.677261	AT1G78890.1 | Symbols: | unknown protein;BEST Arabidopsis thaliana protein match is: unknown protein (TAIR:AT1G16840.1);Has 30201 Blast hits to 17322 proteins in 780 species: Archae - 12;Bacteria - 1396;Metazoa - 17338;Fungi - 3422;Plants - 5037;Vi	AT1G78890.1	AT1G78890.1		3	3	3	42.6	42.6	42.6	17.229	0	20.85	189920000	27	20.8669	21.0919	21.195	20.8451	20.2644	20.4945	20.2833	20.2475
4.92667	-0.677804	AT4G17140.3 | Symbols: | pleckstrin homology (PH) domain-containing protein | chr4:9613617-9636618 REVERSE LENGTH=4219;AT4G17140.1 | Symbols: | pleckstrin homology (PH) domain-containing protein | chr4:9613617-9636618 REVERSE LENGTH=4216;AT4G17140.2 | Sy	AT4G17140.3;AT4G17140.1;AT4G17140.2	AT4G17140.3;AT4G17140.1;AT4G17140.2		53	53	53	19.6	19.6	19.6	471.22	0	323.31	1071900000	143	21.0647	20.9073	21.0214	21.0677	20.4221	20.361	20.3095	20.2575
2.39901	-0.678836	AT5G53070.1 | Symbols: | Ribosomal protein L9/RNase H1 | chr5:21518837-21520167 FORWARD LENGTH=221	AT5G53070.1	AT5G53070.1		10	10	10	44.8	44.8	44.8	25.351	0	221.25	1789300000	86	20.9166	21.1504	21.2935	20.6984	20.3588	20.4405	20.4212	20.123
4.09652	-0.679241	AT4G05530.1 | Symbols: IBR1, SDRA | indole-3-butyric acid response 1 | chr4:2816462-2818074 FORWARD LENGTH=254	AT4G05530.1	AT4G05530.1		14	14	14	77.2	77.2	77.2	26.765	0	219.4	2268300000	160	20.8906	20.9843	20.9385	21.108	20.4225	20.3645	20.2161	20.2013
0.644267	-0.679276	AT2G18960.1 | Symbols: AHA1, PMA, OST2, HA1 | H(+)-ATPase 1 | chr2:8221858-8227268 FORWARD LENGTH=949	AT2G18960.1;AT3G47950.1;AT2G24520.1;AT3G60330.2;AT3G60330.1;AT1G17260.1	AT2G18960.1		65	65	21	53.4	53.4	22.6	104.22	0	323.31	24785000000	788	24.3187	23.1674	25.3352	24.9944	23.7459	23.385	24.1742	23.7935
3.03174	-0.682202	AT5G26667.3 | Symbols: PYR6 | P-loop containing nucleoside triphosphate hydrolases superfamily protein | chr5:9276659-9278091 FORWARD LENGTH=202;AT5G26667.2 | Symbols: PYR6 | P-loop containing nucleoside triphosphate hydrolases superfamily protein | chr5:9	AT5G26667.3;AT5G26667.2;AT5G26667.1;AT3G60961.1;AT3G60180.2;AT3G60180.1	AT5G26667.3;AT5G26667.2;AT5G26667.1		20	20	19	93.1	93.1	93.1	22.481	0	208.57	6061200000	308	25.503	25.5266	25.4367	25.3283	24.4909	24.7532	24.8351	24.9866
1.45733	-0.685103	AT1G08480.1 | Symbols: | unknown protein;FUNCTIONS IN: molecular_function unknown;INVOLVED IN: biological_process unknown;LOCATED IN: mitochondrion, plasma membrane, plastid, vacuole;EXPRESSED IN: 27 plant structures;EXPRESSED DURING: 15 growth stage	AT1G08480.1	AT1G08480.1		12	12	12	71.8	71.8	71.8	15.812	0	323.31	2437000000	139	20.9387	20.967	21.3126	21.2234	20.6033	20.0133	20.0777	21.007
1.66911	-0.68691	AT3G52640.3 | Symbols: | Zn-dependent exopeptidases superfamily protein | chr3:19515625-19520290 REVERSE LENGTH=618;AT3G52640.1 | Symbols: | Zn-dependent exopeptidases superfamily protein | chr3:19515078-19520290 REVERSE LENGTH=676;AT3G52640.2 | Symbols:	AT3G52640.3;AT3G52640.1;AT3G52640.2	AT3G52640.3;AT3G52640.1;AT3G52640.2		5	5	5	15	15	15	66.713	0	17.812	119720000	24	21.0391	20.9528	21.3621	20.7354	20.2468	20.5541	20.6745	19.8664
1.64357	-0.687533	AT1G01290.2 | Symbols: CNX3 | cofactor of nitrate reductase and xanthine dehydrogenase 3 | chr1:114299-115296 FORWARD LENGTH=270;AT1G01290.1 | Symbols: CNX3 | cofactor of nitrate reductase and xanthine dehydrogenase 3 | chr1:114299-115296 FORWARD LENGTH=27	AT1G01290.2;AT1G01290.1	AT1G01290.2;AT1G01290.1		6	6	6	27.8	27.8	27.8	29.512	0	41.436	235040000	26	21.0813	20.9324	21.4632	20.9668	20.7299	20.775	20.0747	20.1138
1.09077	-0.688442	AT5G11110.1 | Symbols: SPS1, ATSPS2F, KNS2, SPS2F | sucrose phosphate synthase 2F | chr5:3536426-3540901 FORWARD LENGTH=1047	AT5G11110.1	AT5G11110.1		37	30	30	47.9	42.8	42.8	116.96	0	148.78	2090500000	203	24.1017	24.1925	24.0393	23.9009	22.4457	23.6414	23.4618	23.9317
2.32216	-0.688519	AT1G04710.1 | Symbols: KAT1, PKT4 | peroxisomal 3-ketoacyl-CoA thiolase 4 | chr1:1321941-1324556 FORWARD LENGTH=443	AT1G04710.1;AT5G48880.1;AT5G48880.3;AT5G48880.2	AT1G04710.1		18	14	14	57.3	50.1	50.1	46.611	0	319.71	1162500000	93	21.0998	20.9468	21.0789	20.7594	20.4716	19.9047	20.2569	20.4976
2.00961	-0.689012	AT2G43030.1 | Symbols: | Ribosomal protein L3 family protein | chr2:17894898-17895713 FORWARD LENGTH=271	AT2G43030.1	AT2G43030.1		6	6	6	34.7	34.7	34.7	29.363	0	21.967	159880000	18	21.0755	21.054	20.9661	20.8477	20.6948	20.279	20.378	19.8355
2.48064	-0.689695	AT2G37860.3 | Symbols: LCD1 | Protein of unknown function (DUF3411) | chr2:15856952-15858793 FORWARD LENGTH=432;AT2G37860.2 | Symbols: LCD1 | Protein of unknown function (DUF3411) | chr2:15856952-15858351 FORWARD LENGTH=347;AT2G37860.1 | Symbols: LCD1 | Pr	AT2G37860.3;AT2G37860.2;AT2G37860.1	AT2G37860.3;AT2G37860.2;AT2G37860.1		9	9	7	28	28	23.6	46.629	0	81.865	368940000	40	20.9677	20.7095	21.1787	21.1406	20.6001	20.2857	20.1753	20.1766
2.92172	-0.689697	AT3G27080.1 | Symbols: TOM20-3 | translocase of outer membrane 20 kDa subunit 3 | chr3:9985212-9986560 REVERSE LENGTH=202	AT3G27080.1	AT3G27080.1		15	15	15	63.4	63.4	63.4	22.565	0	238.6	1819400000	100	20.9181	20.8995	21.331	21.081	20.3806	20.5177	20.3771	20.1954
2.06846	-0.69091	AT3G06850.2 | Symbols: BCE2, LTA1, DIN3 | 2-oxoacid dehydrogenases acyltransferase family protein | chr3:2158212-2160465 REVERSE LENGTH=483;AT3G06850.1 | Symbols: BCE2, LTA1, DIN3 | 2-oxoacid dehydrogenases acyltransferase family protein | chr3:2158212-216	AT3G06850.2;AT3G06850.1	AT3G06850.2;AT3G06850.1		18	18	18	50.3	50.3	50.3	52.706	0	105.93	799850000	106	21.2674	20.8407	21.355	20.8351	20.4738	20.5533	20.4653	20.0421
2.19309	-0.692806	AT3G51830.1 | Symbols: ATG5, SAC8 | SAC domain-containing protein 8 | chr3:19220237-19225092 FORWARD LENGTH=588	AT3G51830.1;AT3G51830.2	AT3G51830.1		7	6	6	19	17.5	17.5	66.463	0	52.974	215360000	24	20.737	20.8726	21.2022	21.2958	20.6115	20.3287	20.2955	20.1006
2.06434	-0.695692	AT2G44610.1 | Symbols: RAB6, ATRABH1B, ATRAB6A, RAB6A | Ras-related small GTP-binding family protein | chr2:18411778-18413883 REVERSE LENGTH=208	AT2G44610.1;AT5G10260.1;AT2G22290.1;AT4G39890.1;AT5G64990.1	AT2G44610.1		21	21	21	80.8	80.8	80.8	23.13	0	323.31	5345900000	328	24.4209	24.2689	24.5763	24.8349	23.9548	23.4234	23.9714	23.9686
2.21102	-0.695908	AT1G76400.1 | Symbols: | Ribophorin I | chr1:28658713-28661672 REVERSE LENGTH=614	AT1G76400.1	AT1G76400.1		21	21	21	43	43	43	68.641	0	180.35	638390000	68	21.0659	20.7763	21.4787	20.9218	20.5619	20.2147	20.3824	20.3
1.7689	-0.698726	AT1G24610.1 | Symbols: | Rubisco methyltransferase family protein | chr1:8720906-8722711 REVERSE LENGTH=476	AT1G24610.1	AT1G24610.1		7	7	7	16	16	16	52.589	0	20.353	165490000	26	21.0932	20.9596	21.1562	21.3632	20.9401	20.5748	20.1763	20.0861
2.30682	-0.699631	AT4G32400.1 | Symbols: EMB104, SHS1, EMB42, ATBT1 | Mitochondrial substrate carrier family protein | chr4:15638686-15640238 FORWARD LENGTH=392	AT4G32400.1	AT4G32400.1		13	13	13	49	49	49	42.571	0	150.59	795890000	91	21.0563	20.7681	21.2919	21.1343	20.6053	20.482	20.3066	20.0582
4.49315	-0.700311	AT1G52730.2 | Symbols: | Transducin/WD40 repeat-like superfamily protein | chr1:19642866-19644978 FORWARD LENGTH=343;AT1G52730.1 | Symbols: | Transducin/WD40 repeat-like superfamily protein | chr1:19642866-19644978 FORWARD LENGTH=343	AT1G52730.2;AT1G52730.1	AT1G52730.2;AT1G52730.1		13	3	3	50.7	16.9	16.9	37.754	0	10.301	112210000	24	20.9464	20.8848	21.0008	20.8042	20.068	20.2604	20.2585	20.2481
1.9352	-0.702583	AT5G57300.3 | Symbols: | S-adenosyl-L-methionine-dependent methyltransferases superfamily protein | chr5:23208705-23210611 REVERSE LENGTH=288;AT5G57300.2 | Symbols: | S-adenosyl-L-methionine-dependent methyltransferases superfamily protein | chr5:2320870	AT5G57300.3;AT5G57300.2;AT5G57300.1	AT5G57300.3;AT5G57300.2;AT5G57300.1		7	7	7	42.4	42.4	42.4	32.289	0	278.36	924450000	64	21.2732	20.6683	21.304	20.7783	20.5075	20.3755	20.324	20.0065
2.39717	-0.702787	AT3G01800.1 | Symbols: | Ribosome recycling factor | chr3:286020-287543 FORWARD LENGTH=267	AT3G01800.1	AT3G01800.1		14	14	14	51.7	51.7	51.7	29.172	0	164.66	1992800000	89	21.0269	21.0081	21.1664	20.7363	20.577	20.4081	20.0876	20.0539
2.74285	-0.703068	AT2G29190.1 | Symbols: APUM2, PUM2 | pumilio 2 | chr2:12544260-12548071 REVERSE LENGTH=972;AT2G29190.2 | Symbols: PUM2 | pumilio 2 | chr2:12544260-12548071 REVERSE LENGTH=972	AT2G29190.1;AT2G29190.2;AT2G29140.1	AT2G29190.1;AT2G29190.2		11	11	6	21.1	21.1	13.9	106.65	0	37.407	202350000	41	20.8937	20.6913	21.204	20.9183	20.3706	19.9991	20.2338	20.2915
0.680206	-0.703341	AT2G20270.1 | Symbols: | Thioredoxin superfamily protein | chr2:8738001-8739617 REVERSE LENGTH=179;AT2G20270.2 | Symbols: | Thioredoxin superfamily protein | chr2:8738001-8739617 REVERSE LENGTH=206	AT2G20270.1;AT2G20270.2	AT2G20270.1;AT2G20270.2		4	4	4	36.3	36.3	36.3	19.125	0	34.177	1491200000	88	21.6929	21.8508	21.1577	21.1248	20.2879	20.1856	20.3999	22.1393
1.75636	-0.70357	AT2G47380.1 | Symbols: | Cytochrome c oxidase subunit Vc family protein | chr2:19441694-19441888 FORWARD LENGTH=64	AT2G47380.1	AT2G47380.1		6	6	6	78.1	78.1	78.1	7.0701	0	58.826	794660000	76	20.8606	20.7025	21.2174	21.2952	20.5841	20.0621	20.6124	20.0027
2.13291	-0.70386	AT2G27730.1 | Symbols: | copper ion binding | chr2:11820056-11820867 REVERSE LENGTH=113	AT2G27730.1	AT2G27730.1		6	6	6	58.4	58.4	58.4	11.947	0	95.641	1133000000	46	21.357	20.6281	21.2794	20.883	20.3493	20.2475	20.4546	20.2806
3.13961	-0.704683	AT3G24350.1 | Symbols: SYP32, ATSYP32 | syntaxin of plants 32 | chr3:8837733-8839402 FORWARD LENGTH=347;AT3G24350.2 | Symbols: SYP32 | syntaxin of plants 32 | chr3:8837733-8839402 FORWARD LENGTH=361	AT3G24350.1;AT3G24350.2	AT3G24350.1;AT3G24350.2		9	9	9	31.7	31.7	31.7	39.119	0	94.198	273400000	43	21.0177	20.8997	21.2863	21.0578	20.573	20.3644	20.2245	20.281
0.847679	-0.705061	AT3G48560.1 | Symbols: CSR1, ALS, AHAS, TZP5, IMR1 | chlorsulfuron/imidazolinone resistant 1 | chr3:18001530-18003542 REVERSE LENGTH=670	AT3G48560.1	AT3G48560.1		39	39	39	59.7	59.7	59.7	72.584	0	323.31	9121800000	597	23.5007	23.8331	23.5422	24.019	21.9955	23.3372	22.8658	23.8762
0.966501	-0.705075	AT5G39410.1 | Symbols: | Saccharopine dehydrogenase | chr5:15768415-15770274 REVERSE LENGTH=454	AT5G39410.1	AT5G39410.1		21	21	21	69.6	69.6	69.6	49.68	0	323.31	2999200000	212	20.8138	21.0435	21.2604	20.4578	20.7647	20.4991	20.2459	19.2455
1.6897	-0.705933	AT5G65020.1 | Symbols: ANNAT2 | annexin 2 | chr5:25973915-25975554 FORWARD LENGTH=317;AT5G65020.2 | Symbols: ANNAT2 | annexin 2 | chr5:25974366-25975554 FORWARD LENGTH=302	AT5G65020.1;AT5G65020.2	AT5G65020.1;AT5G65020.2		10	10	10	40.7	40.7	40.7	36.266	0	29.03	137250000	41	21.0061	21.6356	20.7214	21.0268	20.2624	20.7434	20.3145	20.2459
1.93579	-0.707212	AT5G16590.1 | Symbols: LRR1 | Leucine-rich repeat protein kinase family protein | chr5:5431862-5433921 FORWARD LENGTH=625	AT5G16590.1	AT5G16590.1		12	7	7	25.8	17.9	17.9	67.463	0	91.511	197970000	23	20.9893	21.0875	21.219	20.7322	20.6595	20.2761	20.409	19.8546
1.94372	-0.707318	AT2G21510.1 | Symbols: | DNAJ heat shock N-terminal domain-containing protein | chr2:9210841-9212699 REVERSE LENGTH=346	AT2G21510.1	AT2G21510.1		7	6	6	29.5	29.5	29.5	38.838	0	40.896	226620000	30	21.0186	20.7711	21.4105	20.7742	20.2705	20.5759	20.3363	19.9624
2.37831	-0.709287	AT4G14070.1 | Symbols: AAE15 | acyl-activating enzyme 15 | chr4:8112122-8118039 REVERSE LENGTH=727	AT4G14070.1;AT3G23790.1	AT4G14070.1		14	14	14	26.8	26.8	26.8	81.465	0	138.4	457280000	43	20.8572	20.829	21.1586	20.9937	20.2132	20.6092	20.2482	19.9308
2.89871	-0.712307	AT4G24840.1 | Symbols: | FUNCTIONS IN: molecular_function unknown;INVOLVED IN: protein transport, Golgi organization;LOCATED IN: vacuole;EXPRESSED IN: 23 plant structures;EXPRESSED DURING: 13 growth stages;CONTAINS InterPro DOMAIN/s: COG complex comp	AT4G24840.1	AT4G24840.1		15	15	15	32.4	32.4	32.4	84.618	0	135.55	320920000	64	21.2271	20.8286	20.9159	21.1564	20.4005	20.2125	20.5072	20.1586
2.72446	-0.712451	AT5G64050.1 | Symbols: ATERS, OVA3, ERS | glutamate tRNA synthetase | chr5:25630196-25633099 REVERSE LENGTH=570	AT5G64050.1	AT5G64050.1		9	9	9	25.3	25.3	25.3	63.465	0	137.03	501660000	79	21.0763	20.6803	20.8999	21.1623	20.4765	20.2047	20.2059	20.082
2.29946	-0.713953	AT4G26210.2 | Symbols: | Mitochondrial ATP synthase subunit G protein | chr4:13282370-13283118 FORWARD LENGTH=122;AT4G26210.1 | Symbols: | Mitochondrial ATP synthase subunit G protein | chr4:13282370-13283118 FORWARD LENGTH=122	AT4G26210.2;AT4G26210.1	AT4G26210.2;AT4G26210.1		8	7	7	53.3	45.9	45.9	13.869	0	35.477	1215700000	48	21.0909	20.8474	21.2049	20.7644	20.2072	20.1755	20.6352	20.0338
2.63782	-0.715219	AT4G35630.1 | Symbols: PSAT | phosphoserine aminotransferase | chr4:16904205-16905497 FORWARD LENGTH=430	AT4G35630.1	AT4G35630.1		41	41	27	69.3	69.3	59.5	47.359	0	323.31	29144000000	814	25.3589	25.5438	25.4745	25.8019	24.6181	24.8015	24.7767	25.122
1.99897	-0.715976	AT3G60860.1 | Symbols: | SEC7-like guanine nucleotide exchange family protein | chr3:22484804-22491510 FORWARD LENGTH=1793	AT3G60860.1	AT3G60860.1		18	18	17	16.3	16.3	15.7	199.63	0	58.508	223710000	41	20.8046	21.275	21.0078	20.9992	20.6234	20.5375	20.1541	19.9078
3.48773	-0.719305	AT1G15220.2 | Symbols: ATCCMH, CCMH | cytochrome c biogenesis protein family | chr1:5240471-5241117 REVERSE LENGTH=159;AT1G15220.1 | Symbols: ATCCMH, CCMH | cytochrome c biogenesis protein family | chr1:5240471-5241117 REVERSE LENGTH=159	AT1G15220.2;AT1G15220.1	AT1G15220.2;AT1G15220.1		2	2	2	19.5	19.5	19.5	17.885	0	45.359	251510000	29	21.0876	20.8971	20.9204	20.9032	20.4909	20.1163	20.1596	20.1643
0.925714	-0.721791	AT1G49670.1 | Symbols: NQR | ARP protein (REF) | chr1:18381591-18386021 REVERSE LENGTH=629;AT1G49670.2 | Symbols: NQR | ARP protein (REF) | chr1:18381591-18386021 REVERSE LENGTH=652	AT1G49670.1;AT1G49670.2	AT1G49670.1;AT1G49670.2		31	31	31	55.3	55.3	55.3	67.943	0	323.31	5343600000	217	20.9488	20.6087	21.6581	21.9684	20.8118	20.3233	21.125	20.0367
2.66696	-0.723987	AT4G15640.1 | Symbols: | unknown protein;BEST Arabidopsis thaliana protein match is: unknown protein (TAIR:AT3G21465.1);Has 38 Blast hits to 38 proteins in 14 species: Archae - 0;Bacteria - 0;Metazoa - 0;Fungi - 0;Plants - 38;Viruses - 0;Other Euk	AT4G15640.1;AT3G21465.2;AT3G21465.1	AT4G15640.1		19	19	19	61.5	61.5	61.5	43.91	0	262.99	1331000000	98	21.0577	20.9888	21.2657	20.8893	20.3994	20.4329	20.4914	19.9818
2.77672	-0.724994	AT4G26910.3 | Symbols: | Dihydrolipoamide succinyltransferase | chr4:13520127-13522055 REVERSE LENGTH=365;AT4G26910.2 | Symbols: | Dihydrolipoamide succinyltransferase | chr4:13520127-13522889 REVERSE LENGTH=463;AT4G26910.1 | Symbols: | Dihydrolipoamide	AT4G26910.3;AT4G26910.2;AT4G26910.1	AT4G26910.3;AT4G26910.2;AT4G26910.1		24	10	10	52.6	24.1	24.1	39.702	0	24.98	891620000	65	21.202	20.8836	21.1576	20.8696	20.5679	20.354	20.1198	20.1712
1.96998	-0.725188	AT3G62790.1 | Symbols: | NADH-ubiquinone oxidoreductase-related | chr3:23223321-23224221 REVERSE LENGTH=83;AT2G47690.1 | Symbols: | NADH-ubiquinone oxidoreductase-related | chr2:19551263-19552052 FORWARD LENGTH=118	AT3G62790.1;AT2G47690.1;AT2G47690.2	AT3G62790.1;AT2G47690.1		5	5	5	62.7	62.7	62.7	9.893	0	112.01	876320000	36	21.1135	20.7718	21.0638	21.0331	20.4718	20.6535	20.129	19.8271
2.22236	-0.727751	AT5G58370.2 | Symbols: | P-loop containing nucleoside triphosphate hydrolases superfamily protein | chr5:23593358-23595645 FORWARD LENGTH=465;AT5G58370.1 | Symbols: | P-loop containing nucleoside triphosphate hydrolases superfamily protein | chr5:2359335	AT5G58370.2;AT5G58370.1	AT5G58370.2;AT5G58370.1		13	13	13	31.2	31.2	31.2	52.45	0	178.84	502180000	60	20.9971	20.6125	21.3732	21.0546	20.3565	20.4102	20.0502	20.3095
3.00313	-0.728653	AT5G15910.1 | Symbols: | NAD(P)-binding Rossmann-fold superfamily protein | chr5:5193207-5195202 FORWARD LENGTH=269	AT5G15910.1	AT5G15910.1		12	12	12	52.4	52.4	52.4	28.826	0	93.44	951220000	73	20.8568	20.9141	20.9239	20.9588	20.5002	20.1135	20.2025	19.9227
2.71536	-0.728918	AT1G69030.1 | Symbols: | BSD domain-containing protein | chr1:25947429-25949262 REVERSE LENGTH=317	AT1G69030.1	AT1G69030.1		12	12	11	55.2	55.2	53	34.767	0	96.735	886300000	129	23.3346	23.2352	23.3712	23.5322	22.3366	22.5818	22.7057	22.9334
2.53033	-0.72999	AT5G17060.1 | Symbols: ATARFB1B, ARFB1B | ADP-ribosylation factor B1B | chr5:5611056-5612639 FORWARD LENGTH=192	AT5G17060.1;AT3G03120.1	AT5G17060.1		3	3	3	33.3	33.3	33.3	21.833	0	11.579	159730000	22	20.986	20.7174	21.1476	20.7537	20.2222	20.3783	19.8507	20.2336
0.870658	-0.730051	AT4G21710.1 | Symbols: NRPB2, EMB1989, RPB2 | DNA-directed RNA polymerase family protein | chr4:11535684-11542200 REVERSE LENGTH=1188	AT4G21710.1	AT4G21710.1		16	16	16	19.9	19.9	19.9	135.02	0	65.859	230350000	68	21.8388	22.0438	22.311	22.0477	21.9225	20.1127	21.6561	21.6297
1.64858	-0.730327	AT1G65260.1 | Symbols: PTAC4, VIPP1 | plastid transcriptionally active 4 | chr1:24236329-24240428 FORWARD LENGTH=330	AT1G65260.1	AT1G65260.1		7	7	7	36.1	36.1	36.1	36.392	0	29.049	199580000	29	21.1187	20.9287	21.0201	20.8425	20.6691	20.3166	20.4145	19.5884
3.62106	-0.730877	AT1G55900.2 | Symbols: TIM50 | Haloacid dehalogenase-like hydrolase (HAD) superfamily protein | chr1:20903163-20905420 FORWARD LENGTH=370;AT1G55900.1 | Symbols: TIM50, emb1860 | Haloacid dehalogenase-like hydrolase (HAD) superfamily protein | chr1:20903163	AT1G55900.2;AT1G55900.1	AT1G55900.2;AT1G55900.1		11	11	11	34.3	34.3	34.3	41.89	0	145.66	1966600000	88	20.9103	21.0535	21.1023	21.0961	20.3747	20.5046	20.235	20.1243
4.14321	-0.731421	AT1G72750.1 | Symbols: ATTIM23-2, TIM23-2 | translocase inner membrane subunit 23-2 | chr1:27383577-27384143 FORWARD LENGTH=188	AT1G72750.1	AT1G72750.1		8	8	8	53.2	53.2	53.2	19.878	0	95.162	1499800000	79	20.8487	20.8474	20.9583	21.1549	20.1731	20.2687	20.1903	20.2516
2.23819	-0.731625	AT5G25460.1 | Symbols: | Protein of unknown function, DUF642 | chr5:8863430-8865394 FORWARD LENGTH=369	AT5G25460.1;AT5G11420.1	AT5G25460.1		26	26	26	57.2	57.2	57.2	39.978	0	323.31	19718000000	520	27.2583	26.9628	27.1959	27.1437	26.5433	26.7471	26.3633	25.9804
2.59651	-0.732035	AT1G71260.1 | Symbols: ATWHY2, WHY2 | WHIRLY 2 | chr1:26861849-26863391 REVERSE LENGTH=238	AT1G71260.1	AT1G71260.1		11	11	11	62.6	62.6	62.6	26.295	0	247.4	963280000	85	21.1736	20.9051	20.8555	21.1415	20.5333	20.146	20.0152	20.453
2.86469	-0.732993	AT1G58080.1 | Symbols: ATATP-PRT1, HISN1A, ATP-PRT1 | ATP phosphoribosyl transferase 1 | chr1:21504562-21507429 REVERSE LENGTH=411	AT1G58080.1	AT1G58080.1		9	9	7	33.8	33.8	23.4	44.556	0	148.17	665390000	65	21.1286	21.0329	21.1133	20.8974	20.4341	20.3713	19.9577	20.477
1.82864	-0.734916	AT5G57890.1 | Symbols: | Glutamine amidotransferase type 1 family protein | chr5:23447648-23449622 REVERSE LENGTH=273	AT5G57890.1	AT5G57890.1		5	5	2	31.5	31.5	20.9	30.32	0	54.371	569320000	49	21.2	20.8989	20.9775	21.1482	20.8694	20.3579	19.8984	20.1593
2.37989	-0.734981	AT3G20320.1 | Symbols: TGD2 | trigalactosyldiacylglycerol2 | chr3:7087657-7089640 REVERSE LENGTH=381;AT3G20320.2 | Symbols: TGD2 | trigalactosyldiacylglycerol2 | chr3:7088589-7089640 REVERSE LENGTH=282	AT3G20320.1;AT3G20320.2	AT3G20320.1;AT3G20320.2		9	9	9	42.3	42.3	42.3	41.63	0	152.88	176060000	28	21.0773	20.9566	21.1149	20.8926	20.2911	20.7087	20.0746	20.0269
2.42023	-0.735501	AT1G71730.1 | Symbols: | unknown protein;Has 52 Blast hits to 52 proteins in 24 species: Archae - 0;Bacteria - 0;Metazoa - 4;Fungi - 0;Plants - 41;Viruses - 0;Other Eukaryotes - 7 (source: NCBI BLink). | chr1:26986298-26986831 REVERSE LENGTH=177	AT1G71730.1	AT1G71730.1		5	5	5	30.5	30.5	30.5	19.578	0	79.458	1221800000	40	20.9577	21.107	21.1553	21.0865	20.6573	20.4107	20.3826	19.9139
3.15426	-0.736079	AT2G35720.1 | Symbols: OWL1 | DNAJ heat shock N-terminal domain-containing protein | chr2:15016883-15019866 FORWARD LENGTH=538	AT2G35720.1	AT2G35720.1		16	16	16	44.8	44.8	44.8	59.231	0	323.31	630590000	64	21.1166	20.881	21.1047	21.0953	20.5267	20.3717	20.3118	20.043
2.90163	-0.737734	AT5G16660.2 | Symbols: | unknown protein;FUNCTIONS IN: molecular_function unknown;INVOLVED IN: biological_process unknown;LOCATED IN: chloroplast, membrane;EXPRESSED IN: 23 plant structures;EXPRESSED DURING: 14 growth stages;BEST Arabidopsis thalian	AT5G16660.2;AT5G16660.1	AT5G16660.2;AT5G16660.1		5	5	5	40.4	40.4	40.4	17.858	0	87.968	777910000	50	20.8012	20.9146	21.1644	21.1502	20.4612	20.3892	20.0627	20.1664
2.58108	-0.738598	AT4G26500.1 | Symbols: EMB1374, CPSUFE, ATSUFE, SUFE1 | chloroplast sulfur E | chr4:13382456-13383571 REVERSE LENGTH=371	AT4G26500.1	AT4G26500.1		13	13	13	46.1	46.1	46.1	40.833	0	98.134	1414100000	151	21.1574	20.7891	21.0581	21.0394	20.2545	20.4802	20.4362	19.9188
3.34038	-0.739326	AT5G63380.1 | Symbols: | AMP-dependent synthetase and ligase family protein | chr5:25387581-25390026 REVERSE LENGTH=562	AT5G63380.1	AT5G63380.1		16	16	16	40.9	40.9	40.9	61.277	0	125.22	868080000	63	21.0291	20.762	20.9872	21.2349	20.3185	20.3193	20.2891	20.1291
6.40573	-0.741269	AT1G09780.1 | Symbols: | Phosphoglycerate mutase, 2,3-bisphosphoglycerate-independent | chr1:3165550-3167812 REVERSE LENGTH=557	AT1G09780.1	AT1G09780.1		53	53	39	92.6	92.6	75.2	60.579	0	323.31	51324000000	1277	27.9693	28.0184	27.9953	27.9153	27.1933	27.2675	27.2768	27.1957
2.94308	-0.741331	AT3G03590.1 | Symbols: | SWIB/MDM2 domain superfamily protein | chr3:865341-866669 REVERSE LENGTH=143	AT3G03590.1	AT3G03590.1		9	9	9	37.1	37.1	37.1	15.313	0	99.705	446150000	36	20.9728	20.9414	21.1002	20.7963	20.0454	20.4576	20.3401	20.0021
1.78388	-0.741793	AT1G51540.1 | Symbols: | Galactose oxidase/kelch repeat superfamily protein | chr1:19115702-19117381 FORWARD LENGTH=415	AT1G51540.1	AT1G51540.1		15	15	14	46.3	46.3	43.1	46.747	0	146.22	726030000	55	20.7741	21.1178	20.9057	20.9129	20.4395	20.5657	20.1311	19.6071
1.79359	-0.746751	AT5G15980.1 | Symbols: | Pentatricopeptide repeat (PPR) superfamily protein | chr5:5213290-5215296 FORWARD LENGTH=668	AT5G15980.1	AT5G15980.1		27	27	26	38.2	38.2	37.1	75.298	0	323.31	4381800000	254	21.1507	20.5698	21.2961	21.0662	20.4958	20.58	19.8913	20.1286
2.48426	-0.746847	AT3G01790.2 | Symbols: | Ribosomal protein L13 family protein | chr3:283880-285583 REVERSE LENGTH=205;AT3G01790.1 | Symbols: | Ribosomal protein L13 family protein | chr3:283880-285583 REVERSE LENGTH=205	AT3G01790.2;AT3G01790.1	AT3G01790.2;AT3G01790.1		10	10	10	52.7	52.7	52.7	23.38	0	163.22	1328700000	80	20.9373	20.9845	21.3187	20.856	20.3042	20.0581	20.6078	20.139
0.879912	-0.747626	AT1G60810.1 | Symbols: ACLA-2 | ATP-citrate lyase A-2 | chr1:22388691-22390993 REVERSE LENGTH=423	AT1G60810.1	AT1G60810.1		17	9	9	49.6	30.5	30.5	46.759	0	41.161	151190000	26	22.4123	20.7433	20.6131	20.9504	20.5316	20.6609	20.327	20.2091
1.32796	-0.748405	AT2G20890.1 | Symbols: PSB29, THF1 | photosystem II reaction center PSB29 protein | chr2:8987783-8989185 FORWARD LENGTH=300	AT2G20890.1	AT2G20890.1		11	11	11	46.7	46.7	46.7	33.795	0	151.01	1286400000	114	20.8484	20.6248	21.5064	21.7569	20.5628	20.7434	20.3158	20.1209
2.82776	-0.749117	AT2G47320.1 | Symbols: | Cyclophilin-like peptidyl-prolyl cis-trans isomerase family protein | chr2:19427711-19428839 FORWARD LENGTH=230	AT2G47320.1	AT2G47320.1		3	3	3	10.9	10.9	10.9	26.042	0	12.678	208710000	18	21.0552	20.8145	21.0813	21.0303	20.385	20.4629	20.2213	19.9157
2.55483	-0.752216	AT1G68560.1 | Symbols: ATXYL1, XYL1, TRG1 | alpha-xylosidase 1 | chr1:25734435-25737897 REVERSE LENGTH=915	AT1G68560.1	AT1G68560.1		30	30	27	45	45	45	102.4	0	213.67	2580300000	319	23.911	24.0855	24.3905	23.9434	23.0875	23.5767	23.4353	23.2221
3.00912	-0.752766	AT2G17390.1 | Symbols: AKR2B | ankyrin repeat-containing 2B | chr2:7555870-7557743 FORWARD LENGTH=344	AT2G17390.1	AT2G17390.1		20	20	17	84.3	84.3	80.8	36.899	0	323.31	12252000000	483	26.4747	26.5363	26.1386	26.2843	25.6822	25.7391	25.3502	25.6513
3.54408	-0.75315	AT3G59280.1 | Symbols: TXR1 | Protein Transporter, Pam16 | chr3:21909266-21910519 REVERSE LENGTH=116	AT3G59280.1	AT3G59280.1		3	3	3	35.3	35.3	35.3	12.676	0	10.413	96609000	15	21.0291	21.1142	21.1312	20.8404	20.4192	20.0854	20.3664	20.2314
2.53896	-0.753707	AT3G62600.1 | Symbols: ATERDJ3B, ERDJ3B | DNAJ heat shock family protein | chr3:23151038-23153346 REVERSE LENGTH=346	AT3G62600.1	AT3G62600.1		11	11	11	48.8	48.8	48.8	39.199	0	45.698	946560000	65	20.8136	21.0093	21.1843	21.0361	20.5823	20.3702	20.098	19.9779
3.11802	-0.753992	AT1G01710.1 | Symbols: | Acyl-CoA thioesterase family protein | chr1:262950-266029 FORWARD LENGTH=427	AT1G01710.1	AT1G01710.1		12	12	12	40.7	40.7	40.7	48.155	0	144.8	711720000	54	20.851	21.0881	21.0935	21.053	20.5114	20.2803	20.2819	19.9959
1.85927	-0.75463	AT1G09300.1 | Symbols: | Metallopeptidase M24 family protein | chr1:3003981-3008131 FORWARD LENGTH=493;AT1G09300.2 | Symbols: | Metallopeptidase M24 family protein | chr1:3004485-3008131 FORWARD LENGTH=462	AT1G09300.1;AT1G09300.2	AT1G09300.1;AT1G09300.2		7	7	7	23.7	23.7	23.7	54.981	0	47.788	171150000	28	20.9939	21.09	20.8763	21.0048	20.8142	20.2592	19.7942	20.0788
2.27981	-0.754783	AT2G34970.1 | Symbols: | Trimeric LpxA-like enzyme | chr2:14746340-14748532 FORWARD LENGTH=730	AT2G34970.1;AT3G02270.1	AT2G34970.1		17	17	15	33	33	31.4	81.863	0	62.263	357530000	63	21.2265	20.586	21.1289	21.0461	20.467	20.3708	20.023	20.1076
2.05597	-0.757207	AT1G19520.1 | Symbols: NFD5 | pentatricopeptide (PPR) repeat-containing protein | chr1:6760032-6762581 FORWARD LENGTH=725	AT1G19520.1;AT1G19520.2	AT1G19520.1		19	19	19	29.2	29.2	29.2	82.535	0	104.18	1680200000	130	20.8896	20.6886	21.3327	21.0437	20.2795	20.5547	20.2398	19.8518
3.36303	-0.758602	AT5G42270.1 | Symbols: VAR1, FTSH5 | FtsH extracellular protease family | chr5:16902659-16905102 FORWARD LENGTH=704	AT5G42270.1	AT5G42270.1		16	16	3	34.8	34.8	10.9	75.231	0	323.31	974460000	92	20.6749	20.8574	20.9991	21.116	20.2375	20.0836	20.2501	20.0417
2.63694	-0.759111	AT3G04830.2 | Symbols: | Protein prenylyltransferase superfamily protein | chr3:1326289-1329132 FORWARD LENGTH=299;AT3G04830.1 | Symbols: | Protein prenylyltransferase superfamily protein | chr3:1326289-1329132 FORWARD LENGTH=303	AT3G04830.2;AT3G04830.1;AT5G28220.1	AT3G04830.2;AT3G04830.1		9	9	9	28.8	28.8	28.8	33.286	0	29.392	257500000	32	21.061	20.9879	21.3261	20.9875	20.6183	20.2045	20.4532	20.0501
3.35176	-0.763053	AT4G34700.1 | Symbols: CIB22, AtCIB22 | LYR family of Fe/S cluster biogenesis protein | chr4:16556874-16558362 FORWARD LENGTH=117	AT4G34700.1	AT4G34700.1		10	10	10	75.2	75.2	75.2	13.616	0	118.65	3305200000	113	21.2085	21.0404	21.1341	21.061	20.5604	20.4777	20.1168	20.237
1.96372	-0.764742	AT3G48680.1 | Symbols: GAMMA CAL2 | gamma carbonic anhydrase-like 2 | chr3:18035107-18036773 FORWARD LENGTH=256	AT3G48680.1	AT3G48680.1		19	19	9	80.1	80.1	40.6	27.956	0	293.93	5385700000	207	21.2237	20.7095	20.9254	21.1245	20.654	20.3908	19.9599	19.9195
0.799473	-0.769023	AT3G52380.1 | Symbols: CP33, PDE322 | chloroplast RNA-binding protein 33 | chr3:19421619-19422855 FORWARD LENGTH=329	AT3G52380.1	AT3G52380.1		9	9	9	34.7	34.7	34.7	35.744	0	137.23	827270000	73	20.5437	20.9346	20.7565	22.4855	20.5114	20.867	20.2305	20.0354
3.0189	-0.769236	AT2G02500.1 | Symbols: ISPD, ATMEPCT, MCT | Nucleotide-diphospho-sugar transferases superfamily protein | chr2:671054-673124 REVERSE LENGTH=302	AT2G02500.1	AT2G02500.1		9	9	9	42.4	42.4	42.4	33.937	0	42.942	377180000	49	20.858	20.7427	21.1864	20.9981	20.3891	20.1865	20.1599	19.9727
1.59293	-0.770999	AT5G51740.1 | Symbols: | Peptidase family M48 family protein | chr5:21017110-21018987 FORWARD LENGTH=442	AT5G51740.1	AT5G51740.1		30	30	30	57.5	57.5	57.5	49.658	0	323.31	6301700000	241	21.1091	20.9409	21.0189	21.2192	20.6459	20.3975	20.6046	19.5561
0.870697	-0.771242	AT4G38930.1 | Symbols: | Ubiquitin fusion degradation UFD1 family protein | chr4:18149907-18151616 FORWARD LENGTH=311;AT4G38930.2 | Symbols: | Ubiquitin fusion degradation UFD1 family protein | chr4:18149907-18151616 FORWARD LENGTH=315	AT4G38930.1;AT4G38930.2	AT4G38930.1;AT4G38930.2		5	3	3	18.6	13.2	13.2	34.582	0	16.617	168390000	34	22.6455	20.7548	20.931	21.2136	20.7371	20.7914	20.6627	20.2687
3.34627	-0.771551	AT5G43970.1 | Symbols: TOM22-V, TOM9-2, ATTOM22-V | translocase of outer membrane 22-V | chr5:17692888-17693187 FORWARD LENGTH=99	AT5G43970.1	AT5G43970.1		3	3	3	23.2	23.2	23.2	10.378	0	239.34	3314300000	48	21.2044	20.9034	21.1321	21.3352	20.4438	20.5176	20.2875	20.24
2.23598	-0.772052	AT2G02130.1 | Symbols: PDF2.3, LCR68 | low-molecular-weight cysteine-rich 68 | chr2:540071-540407 FORWARD LENGTH=77	AT2G02130.1	AT2G02130.1		2	2	2	31.2	31.2	31.2	8.544	0	116.99	4816700000	55	21.0081	20.7029	21.2323	21.3472	20.6535	20.2034	20.1914	20.1539
2.93393	-0.77384	AT2G33800.1 | Symbols: | Ribosomal protein S5 family protein | chr2:14300925-14302352 REVERSE LENGTH=303	AT2G33800.1	AT2G33800.1		6	6	6	24.1	24.1	24.1	32.645	0	42.591	208270000	41	20.7751	21.092	21.3397	21.1138	20.4703	20.3557	20.1798	20.2195
3.2167	-0.776663	AT2G43360.1 | Symbols: BIO2, BIOB | Radical SAM superfamily protein | chr2:18010918-18013129 REVERSE LENGTH=378	AT2G43360.1	AT2G43360.1		7	7	7	26.7	26.7	26.7	41.681	0	45.213	291710000	36	20.7538	21.0943	21.0287	20.9992	20.4004	19.9707	20.1289	20.2693
2.21844	-0.778454	AT3G22330.1 | Symbols: PMH2, ATRH53 | putative mitochondrial RNA helicase 2 | chr3:7892641-7895145 FORWARD LENGTH=616	AT3G22330.1	AT3G22330.1		45	45	33	64	64	48.7	65.359	0	323.31	12373000000	451	20.8643	20.7548	21.2333	21.2388	20.4987	20.4078	20.2038	19.867
2.80137	-0.780027	AT5G14580.1 | Symbols: | polyribonucleotide nucleotidyltransferase, putative | chr5:4697612-4703013 REVERSE LENGTH=991	AT5G14580.1	AT5G14580.1		31	31	31	46.3	46.3	46.3	107.77	0	283.17	1795000000	176	20.8406	21.0544	20.9946	21.244	20.241	20.4544	19.9315	20.3865
3.01911	-0.781493	ATMG00090.1 | Symbols: | structural constituent of ribosome;protein binding | chrM:25482-28733 REVERSE LENGTH=556	ATMG00090.1	ATMG00090.1		15	15	15	31.7	31.7	31.7	64.716	0	251.39	1311500000	68	21.2114	20.8508	21.0655	20.9778	20.5081	20.0533	20.3219	20.0962
2.20437	-0.78732	AT4G01690.1 | Symbols: PPOX, HEMG1, PPO1 | Flavin containing amine oxidoreductase family | chr4:729929-732309 FORWARD LENGTH=537;AT4G01690.2 | Symbols: PPOX | Flavin containing amine oxidoreductase family | chr4:729929-732309 FORWARD LENGTH=506	AT4G01690.1;AT4G01690.2	AT4G01690.1;AT4G01690.2		15	15	15	45.3	45.3	45.3	57.695	0	129.28	1141500000	119	21.163	20.7333	20.9168	21.3679	20.4852	20.4829	19.9938	20.0699
1.45809	-0.787576	AT3G13060.2 | Symbols: ECT5 | evolutionarily conserved C-terminal region 5 | chr3:4180625-4183632 FORWARD LENGTH=634;AT3G13060.1 | Symbols: ECT5 | evolutionarily conserved C-terminal region 5 | chr3:4180625-4183297 FORWARD LENGTH=551	AT3G13060.2;AT3G13060.1	AT3G13060.2;AT3G13060.1		11	11	11	33.9	33.9	33.9	69.481	0	46.636	407340000	67	20.7165	21.895	20.9392	21.0261	20.7211	20.1392	20.3713	20.1949
3.41354	-0.789735	AT5G12250.1 | Symbols: TUB6 | beta-6 tubulin | chr5:3961317-3962971 REVERSE LENGTH=449	AT5G12250.1	AT5G12250.1		40	11	9	81.7	33.6	29.4	50.585	0	320.66	4670000000	238	25.9149	25.7794	25.6921	25.6513	24.8388	24.8374	24.9644	25.2383
1.80388	-0.789909	AT1G65540.1 | Symbols: | LETM1-like protein | chr1:24362382-24366011 REVERSE LENGTH=736	AT1G65540.1	AT1G65540.1		10	10	10	24.2	24.2	24.2	83.56	0	56.1	402730000	34	20.7132	20.7964	21.38	21.0462	20.2642	20.6796	19.9831	19.8494
3.2942	-0.791465	AT4G27690.2 | Symbols: VPS26B | vacuolar protein sorting 26B | chr4:13824324-13826235 FORWARD LENGTH=275;AT4G27690.1 | Symbols: VPS26B | vacuolar protein sorting 26B | chr4:13824019-13826235 FORWARD LENGTH=303	AT4G27690.2;AT4G27690.1	AT4G27690.2;AT4G27690.1		6	3	3	22.2	9.1	9.1	32.108	0	15.364	158570000	25	20.918	20.8883	20.9941	21.0533	19.9074	20.4127	20.2816	20.0861
3.86208	-0.793471	AT1G71500.1 | Symbols: | Rieske (2Fe-2S) domain-containing protein | chr1:26936084-26937331 FORWARD LENGTH=287	AT1G71500.1	AT1G71500.1		4	4	4	21.3	21.3	21.3	31.727	0	33.83	106280000	26	21.2954	20.8953	21.1896	21.1584	20.3206	20.3573	20.4305	20.2564
1.20605	-0.796731	AT3G57090.1 | Symbols: BIGYIN, FIS1A | Tetratricopeptide repeat (TPR)-like superfamily protein | chr3:21128627-21129981 FORWARD LENGTH=170	AT3G57090.1	AT3G57090.1		6	6	6	51.8	51.8	51.8	18.698	0	36.678	321260000	43	22.1939	20.8671	21.068	20.9366	20.7313	20.7417	20.2487	20.157
2.20585	-0.797989	AT5G61220.1 | Symbols: | LYR family of Fe/S cluster biogenesis protein | chr5:24626057-24626320 REVERSE LENGTH=87	AT5G61220.1	AT5G61220.1		7	7	7	58.6	58.6	58.6	10.115	0	18.097	555650000	38	21.2115	20.923	21.5379	21.0478	20.6557	20.5367	20.3217	20.0141
2.09742	-0.802797	AT5G39840.1 | Symbols: | ATP-dependent RNA helicase, mitochondrial, putative | chr5:15946769-15949186 FORWARD LENGTH=776	AT5G39840.1	AT5G39840.1		10	10	10	19.2	19.2	19.2	88.193	0	61.496	250280000	33	20.8433	21.208	21.5013	20.7315	20.2561	20.5526	20.2309	20.0332
1.79067	-0.807952	AT4G26650.2 | Symbols: | RNA-binding (RRM/RBD/RNP motifs) family protein | chr4:13445265-13447592 FORWARD LENGTH=452;AT4G26650.1 | Symbols: | RNA-binding (RRM/RBD/RNP motifs) family protein | chr4:13445552-13447592 FORWARD LENGTH=455	AT4G26650.2;AT4G26650.1;AT5G55550.4;AT5G55550.1;AT5G55550.3;AT5G55550.2	AT4G26650.2;AT4G26650.1		15	15	15	61.7	61.7	61.7	49.056	0	75.784	243670000	52	21.5308	21.6602	20.8852	20.8364	20.7489	20.4254	20.2811	20.2254
3.49831	-0.80895	AT2G01350.2 | Symbols: QPT | quinolinate phoshoribosyltransferase | chr2:165332-166842 REVERSE LENGTH=281;AT2G01350.4 | Symbols: QPT | quinolinate phoshoribosyltransferase | chr2:165332-167058 REVERSE LENGTH=327;AT2G01350.1 | Symbols: QPT | quinolinate pho	AT2G01350.2;AT2G01350.4;AT2G01350.1;AT2G01350.3	AT2G01350.2;AT2G01350.4;AT2G01350.1;AT2G01350.3		8	8	8	48	48	48	30.845	0	49.927	551840000	51	21.1547	20.9673	21.3057	21.1772	20.2888	20.1628	20.5673	20.3503
2.40387	-0.809237	AT5G16300.1 | Symbols: | Vps51/Vps67 family (components of vesicular transport) protein | chr5:5338119-5342186 FORWARD LENGTH=1068;AT5G16300.2 | Symbols: | Vps51/Vps67 family (components of vesicular transport) protein | chr5:5338119-5342186 FORWARD LENG	AT5G16300.1;AT5G16300.2;AT5G16300.3;AT5G16300.4	AT5G16300.1;AT5G16300.2;AT5G16300.3;AT5G16300.4		14	14	14	16.9	16.9	16.9	118.8	0	59.055	286880000	65	20.709	20.9199	21.38	20.9853	20.351	20.1402	20.3687	19.8973
2.71047	-0.810718	AT3G17970.1 | Symbols: atToc64-III, TOC64-III | translocon at the outer membrane of chloroplasts 64-III | chr3:6148030-6151794 FORWARD LENGTH=589	AT3G17970.1	AT3G17970.1		13	13	13	34.6	34.6	34.6	64.025	0	100.88	487420000	67	21.1014	20.8128	20.8829	21.3478	20.5131	20.1725	20.113	20.1034
0.552295	-0.814419	AT2G30200.1 | Symbols: | catalytics;transferases;[acyl-carrier-protein] S-malonyltransferases;binding | chr2:12883162-12885482 REVERSE LENGTH=393;AT2G30200.2 | Symbols: | catalytics;transferases;[acyl-carrier-protein] S-malonyltransferases;binding | chr2	AT2G30200.1;AT2G30200.2	AT2G30200.1;AT2G30200.2		9	9	9	28.5	28.5	28.5	41.522	0	170.72	1692500000	112	20.9335	22.5809	22.2068	22.9423	21.9029	20.6782	22.5515	20.2731
2.13428	-0.820526	AT1G26460.1 | Symbols: | Tetratricopeptide repeat (TPR)-like superfamily protein | chr1:9151816-9154407 FORWARD LENGTH=630	AT1G26460.1	AT1G26460.1		20	20	20	39.7	39.7	39.7	70.234	0	306.83	3047900000	173	21.0584	21.0236	21.2723	20.9166	20.7257	20.3685	20.0509	19.8437
1.69423	-0.823694	AT3G51550.1 | Symbols: FER | Malectin/receptor-like protein kinase family protein | chr3:19117877-19120564 REVERSE LENGTH=895	AT3G51550.1;AT3G04690.1;AT5G28680.1;AT5G39000.1;AT5G38990.1	AT3G51550.1		21	21	17	30.6	30.6	27.9	98.149	0	316.37	951500000	95	20.9036	20.789	20.9613	21.852	20.526	20.3626	20.2565	20.0659
3.28375	-0.824941	AT3G03600.1 | Symbols: RPS2 | ribosomal protein S2 | chr3:867847-868506 REVERSE LENGTH=219	AT3G03600.1	AT3G03600.1		12	12	12	62.6	62.6	62.6	24.773	0	96.413	770780000	79	20.9821	20.9887	20.8894	21.1389	20.312	20.1929	20.3387	19.8556
3.92178	-0.825148	AT3G25680.1 | Symbols: | FUNCTIONS IN: molecular_function unknown;INVOLVED IN: biological_process unknown;LOCATED IN: chloroplast;EXPRESSED IN: 21 plant structures;EXPRESSED DURING: 13 growth stages;CONTAINS InterPro DOMAIN/s: S-layer homology domain	AT3G25680.1	AT3G25680.1		8	8	8	23.3	23.3	23.3	63.057	0	58.588	203630000	23	21.1501	20.9313	21.3581	21.1914	20.3935	20.3339	20.3621	20.2409
3.68605	-0.825302	AT1G65980.1 | Symbols: TPX1 | thioredoxin-dependent peroxidase 1 | chr1:24559524-24560753 REVERSE LENGTH=162;AT1G65980.2 | Symbols: TPX1 | thioredoxin-dependent peroxidase 1 | chr1:24559595-24560753 REVERSE LENGTH=121	AT1G65980.1;AT1G65980.2	AT1G65980.1;AT1G65980.2		18	18	16	90.1	90.1	90.1	17.428	0	323.31	29275000000	632	28.0128	28.1313	27.946	27.9693	26.9212	27.2712	27.2061	27.3597
2.84819	-0.825886	AT1G08680.2 | Symbols: ZIGA4 | ARF GAP-like zinc finger-containing protein ZIGA4 | chr1:2762820-2768387 FORWARD LENGTH=648;AT1G08680.1 | Symbols: ZIGA4, AGD14 | ARF GAP-like zinc finger-containing protein ZIGA4 | chr1:2762820-2768387 FORWARD LENGTH=649;AT1	AT1G08680.2;AT1G08680.1;AT1G08680.4;AT1G08680.3	AT1G08680.2;AT1G08680.1;AT1G08680.4;AT1G08680.3		5	5	5	18.7	18.7	18.7	71.215	0	51.04	175870000	40	21.2047	20.8893	21.1235	20.9792	20.4066	20.484	19.96	20.0425
1.97704	-0.828226	AT3G47930.1 | Symbols: ATGLDH, GLDH | L-galactono-1,4-lactone dehydrogenase | chr3:17684500-17687426 FORWARD LENGTH=610;AT3G47930.2 | Symbols: ATGLDH, GLDH | L-galactono-1,4-lactone dehydrogenase | chr3:17684500-17686940 FORWARD LENGTH=512	AT3G47930.1;AT3G47930.2	AT3G47930.1;AT3G47930.2		36	36	36	54.1	54.1	54.1	68.554	0	323.31	4704600000	259	20.5049	20.978	21.3698	21.0624	19.9962	20.3301	20.4318	19.8441
2.2218	-0.828422	AT5G04130.1 | Symbols: GYRB2 | DNA GYRASE B2 | chr5:1122084-1128031 REVERSE LENGTH=732;AT5G04130.2 | Symbols: | DNA GYRASE B2 | chr5:1123729-1128031 REVERSE LENGTH=519	AT5G04130.1;AT5G04130.2	AT5G04130.1;AT5G04130.2		23	23	14	41.5	41.5	32.8	81.052	0	311.39	1296600000	117	20.8151	20.7722	21.3088	21.1894	20.5003	19.933	20.3921	19.9466
2.46562	-0.829	AT3G62360.1 | Symbols: | Carbohydrate-binding-like fold | chr3:23073020-23080455 REVERSE LENGTH=1227	AT3G62360.1	AT3G62360.1		45	45	45	49.2	49.2	49.2	132.94	0	323.31	4294900000	349	21.1977	20.66	21.323	21.0121	20.2524	20.3748	20.3305	19.919
2.20191	-0.829121	AT4G12420.2 | Symbols: SKU5 | Cupredoxin superfamily protein | chr4:7349941-7352868 REVERSE LENGTH=587;AT4G12420.1 | Symbols: SKU5 | Cupredoxin superfamily protein | chr4:7349941-7352868 REVERSE LENGTH=587	AT4G12420.2;AT4G12420.1	AT4G12420.2;AT4G12420.1		15	15	15	35.1	35.1	35.1	65.637	0	273.15	3115300000	212	24.1749	23.8684	24.2223	24.0419	22.7871	23.1177	23.6112	23.4749
3.87057	-0.829648	AT5G15320.2 | Symbols: | unknown protein;FUNCTIONS IN: molecular_function unknown;INVOLVED IN: biological_process unknown;LOCATED IN: endomembrane system;EXPRESSED IN: 23 plant structures;EXPRESSED DURING: 15 growth stages;BEST Arabidopsis thaliana	AT5G15320.2;AT5G15320.1	AT5G15320.2;AT5G15320.1		2	2	2	64	64	64	5.2622	0	11.539	107790000	16	21.1739	20.9231	21.1131	21.1337	20.2286	20.4268	20.3153	20.0545
1.65482	-0.833823	AT3G58730.1 | Symbols: | vacuolar ATP synthase subunit D (VATD) / V-ATPase D subunit / vacuolar proton pump D subunit (VATPD) | chr3:21718495-21719280 REVERSE LENGTH=261	AT3G58730.1	AT3G58730.1		16	16	16	62.5	62.5	62.5	29.058	0	118.06	1781900000	155	24.3402	24.1801	23.4691	24.1986	22.7982	22.9877	23.549	23.5179
3.57247	-0.840128	AT3G50930.1 | Symbols: BCS1 | cytochrome BC1 synthesis | chr3:18929817-18931547 FORWARD LENGTH=576	AT3G50930.1	AT3G50930.1		13	13	12	32.3	32.3	30.2	66.136	0	122.32	908580000	105	21.0152	21.0556	20.8857	21.0164	20.1821	20.3635	19.8662	20.2006
0.915694	-0.840311	AT4G24780.1 | Symbols: | Pectin lyase-like superfamily protein | chr4:12770631-12772227 REVERSE LENGTH=408;AT4G24780.2 | Symbols: | Pectin lyase-like superfamily protein | chr4:12770631-12772227 REVERSE LENGTH=408	AT4G24780.1;AT4G24780.2;AT5G63180.1	AT4G24780.1;AT4G24780.2		5	4	4	16.9	14.5	14.5	45.013	0	142.71	491130000	48	20.658	20.7819	22.5853	20.9253	20.7223	20.2937	20.3495	20.2237
2.44307	-0.84304	AT4G22000.1 | Symbols: | unknown protein;Has 30201 Blast hits to 17322 proteins in 780 species: Archae - 12;Bacteria - 1396;Metazoa - 17338;Fungi - 3422;Plants - 5037;Viruses - 0;Other Eukaryotes - 2996 (source: NCBI BLink). | chr4:11659810-1166020	AT4G22000.1	AT4G22000.1		10	10	10	53.8	53.8	53.8	15.455	0	58.236	914880000	70	20.8691	20.8129	21.3975	20.9188	20.4815	20.1205	20.1418	19.8823
2.05687	-0.843849	AT1G80270.3 | Symbols: PPR596 | PENTATRICOPEPTIDE REPEAT 596 | chr1:30181265-30183331 FORWARD LENGTH=596;AT1G80270.2 | Symbols: PPR596 | PENTATRICOPEPTIDE REPEAT 596 | chr1:30181265-30183331 FORWARD LENGTH=596;AT1G80270.1 | Symbols: PPR596 | PENTATRICOPEPT	AT1G80270.3;AT1G80270.2;AT1G80270.1	AT1G80270.3;AT1G80270.2;AT1G80270.1		34	34	33	57.4	57.4	57.4	67.281	0	323.31	3977100000	220	20.8023	20.8785	21.3173	21.3666	20.4416	19.8472	20.586	20.1143
2.86557	-0.845328	AT2G03390.1 | Symbols: | uvrB/uvrC motif-containing protein | chr2:1030635-1032354 REVERSE LENGTH=330;AT2G03390.2 | Symbols: | uvrB/uvrC motif-containing protein | chr2:1030635-1031918 REVERSE LENGTH=220	AT2G03390.1;AT2G03390.2	AT2G03390.1;AT2G03390.2		10	10	10	41.2	41.2	41.2	37.44	0	58.651	603540000	79	20.951	20.9972	21.2899	21.2859	20.3325	20.4262	20.4498	19.9341
2.90596	-0.846746	AT3G63140.1 | Symbols: CSP41A | chloroplast stem-loop binding protein of 41 kDa | chr3:23327006-23328620 REVERSE LENGTH=406	AT3G63140.1	AT3G63140.1		7	7	7	33.7	33.7	33.7	43.929	0	42.928	256770000	22	20.9219	21.0823	21.2315	21.0004	20.5962	20.165	20.0916	19.9965
3.10896	-0.847195	AT3G49240.1 | Symbols: emb1796 | Pentatricopeptide repeat (PPR) superfamily protein | chr3:18256086-18257975 FORWARD LENGTH=629	AT3G49240.1	AT3G49240.1		25	25	25	49.4	49.4	49.4	71.292	0	249.93	3559400000	225	21.1962	21.2739	20.9089	21.0954	20.5971	20.1208	20.2136	20.1541
0.857773	-0.848649	AT2G34590.1 | Symbols: | Transketolase family protein | chr2:14568956-14570844 REVERSE LENGTH=406	AT2G34590.1	AT2G34590.1		11	11	2	27.8	27.8	3.9	44.015	0	84.069	1576300000	130	20.9959	21.8019	20.5778	22.3411	20.579	20.2825	20.0409	21.4196
2.38234	-0.849632	ATCG00130.1 | Symbols: ATPF | ATPase, F0 complex, subunit B/B, bacterial/chloroplast | chrC:11529-12798 REVERSE LENGTH=184	ATCG00130.1	ATCG00130.1		4	4	4	32.1	32.1	32.1	21.057	0	99.9	379340000	34	21.4579	20.8345	21.2843	20.9064	20.5189	20.3472	20.2534	19.965
2.83078	-0.850194	AT5G51040.2 | Symbols: | unknown protein;CONTAINS InterPro DOMAIN/s: Protein of unknown function DUF339 (InterPro:IPR005631);Has 368 Blast hits to 368 proteins in 141 species: Archae - 0;Bacteria - 216;Metazoa - 8;Fungi - 13;Plants - 40;Viruses - 0	AT5G51040.2;AT5G51040.1;AT5G51040.3	AT5G51040.2;AT5G51040.1;AT5G51040.3		4	4	4	26.1	26.1	26.1	20.73	0	15.713	189750000	19	21.2248	20.8945	21.4488	21.2054	20.5963	20.3671	20.3166	20.0926
1.99931	-0.852367	AT1G74040.1 | Symbols: IMS1, MAML-3, IPMS2 | 2-isopropylmalate synthase 1 | chr1:27842258-27845566 FORWARD LENGTH=631	AT1G74040.1	AT1G74040.1		25	10	10	55.9	26.5	26.5	68.135	0	106.09	525910000	70	21.1999	20.9331	21.1412	21.9221	20.5146	20.6368	20.362	20.2735
1.53418	-0.8538	AT4G01100.1 | Symbols: ADNT1 | adenine nucleotide transporter 1 | chr4:477411-479590 FORWARD LENGTH=352;AT4G01100.2 | Symbols: ADNT1 | adenine nucleotide transporter 1 | chr4:477411-479590 FORWARD LENGTH=366	AT4G01100.1;AT4G01100.2;AT4G26180.1;AT1G14560.1	AT4G01100.1;AT4G01100.2		33	33	33	71.9	71.9	71.9	38.325	0	323.31	7019000000	305	21.1918	20.7807	21.1139	21.1273	20.591	20.7112	19.4718	20.0245
1.9771	-0.854657	AT3G27550.1 | Symbols: | RNA-binding CRS1 / YhbY (CRM) domain protein | chr3:10208010-10209899 REVERSE LENGTH=491	AT3G27550.1	AT3G27550.1		5	5	5	12.8	12.8	12.8	57.003	0	18.812	114060000	20	20.9874	21.0851	21.2701	20.8927	20.8013	20.255	19.8249	19.9355
1.364	-0.857575	AT2G20800.1 | Symbols: NDB4 | NAD(P)H dehydrogenase B4 | chr2:8953252-8955699 REVERSE LENGTH=582	AT2G20800.1	AT2G20800.1		41	41	41	63.7	63.7	63.7	65.371	0	323.31	6620400000	337	20.7823	21.0488	21.1742	21.1385	20.5878	20.4237	20.49	19.212
1.00495	-0.858581	AT1G64760.1 | Symbols: | O-Glycosyl hydrolases family 17 protein | chr1:24054220-24056194 REVERSE LENGTH=481;AT1G64760.2 | Symbols: | O-Glycosyl hydrolases family 17 protein | chr1:24054220-24056194 REVERSE LENGTH=481	AT1G64760.1;AT1G64760.2;AT2G19440.1	AT1G64760.1;AT1G64760.2		10	10	10	31.4	31.4	31.4	52.281	0	58.436	386270000	52	20.6974	20.9328	22.4414	20.9746	20.8847	20.4855	20.2304	20.0112
0.481587	-0.860399	AT3G44310.1 | Symbols: NIT1, ATNIT1, NITI | nitrilase 1 | chr3:15986901-15988841 FORWARD LENGTH=346;AT3G44310.3 | Symbols: NIT1, ATNIT1, NITI | nitrilase 1 | chr3:15986901-15988841 FORWARD LENGTH=346	AT3G44310.1;AT3G44310.3;AT3G44310.2	AT3G44310.1;AT3G44310.3		15	15	9	53.8	53.8	41	38.152	0	120.75	1114800000	159	23.3015	23.6457	23.761	23.5615	20.3274	23.1592	23.4882	23.8533
3.7749	-0.861791	AT2G46540.1 | Symbols: | unknown protein;FUNCTIONS IN: molecular_function unknown;INVOLVED IN: biological_process unknown;LOCATED IN: mitochondrion, membrane;EXPRESSED IN: 25 plant structures;EXPRESSED DURING: 16 growth stages;Has 42 Blast hits to 4	AT2G46540.1	AT2G46540.1		4	4	4	27.7	27.7	27.7	6.8031	0	21.372	1439100000	66	21.1768	20.9203	21.0105	20.8989	20.0279	20.3312	20.222	19.9783
2.08705	-0.861805	AT5G08450.3 | Symbols: | FUNCTIONS IN: molecular_function unknown;INVOLVED IN: biological_process unknown;LOCATED IN: cellular_component unknown;EXPRESSED IN: 25 plant structures;EXPRESSED DURING: 15 growth stages;CONTAINS InterPro DOMAIN/s: Histone	AT5G08450.3;AT5G08450.2;AT5G08450.1	AT5G08450.3;AT5G08450.2;AT5G08450.1		5	5	5	9	9	9	104.15	0	15.359	101640000	24	21.6725	21.1359	21.0012	21.7232	20.3691	20.8293	20.6108	20.2763
1.28828	-0.863599	AT2G31370.5 | Symbols: | Basic-leucine zipper (bZIP) transcription factor family protein | chr2:13379448-13381037 FORWARD LENGTH=377;AT2G31370.6 | Symbols: | Basic-leucine zipper (bZIP) transcription factor family protein | chr2:13379448-13381072 FORWARD	AT2G31370.5;AT2G31370.6;AT2G31370.4;AT2G31370.3;AT2G31370.2;AT2G31370.1	AT2G31370.5;AT2G31370.6;AT2G31370.4;AT2G31370.3;AT2G31370.2;AT2G31370.1		5	5	4	18.3	18.3	18.3	41.716	0	14.443	189700000	31	21.1162	22.3142	21.109	20.8134	20.6897	20.6846	20.1879	20.3362
3.76856	-0.86398	AT4G36420.1 | Symbols: | Ribosomal protein L12 family protein | chr4:17203718-17204257 REVERSE LENGTH=179	AT4G36420.1	AT4G36420.1		7	7	7	36.9	36.9	36.9	19.513	0	49.633	757510000	49	21.018	20.8943	21.2362	20.8166	20.1058	20.0449	20.2743	20.0843
3.46215	-0.867558	AT5G53650.1 | Symbols: | unknown protein;FUNCTIONS IN: molecular_function unknown;INVOLVED IN: biological_process unknown;LOCATED IN: endomembrane system;EXPRESSED IN: 23 plant structures;EXPRESSED DURING: 15 growth stages;Has 30201 Blast hits to 17	AT5G53650.1	AT5G53650.1		5	5	5	40.3	40.3	40.3	8.0289	0	61.605	1915200000	49	20.9971	20.9832	21.0265	21.0273	20.4565	20.031	20.1738	19.9026
3.08735	-0.86772	AT3G15000.1 | Symbols: | cobalt ion binding | chr3:5050321-5052121 FORWARD LENGTH=395	AT3G15000.1;AT1G53260.2;AT1G53260.1	AT3G15000.1		14	14	14	22.3	22.3	22.3	42.869	0	221.96	7454600000	197	21.0568	21.4087	20.9553	21.33	20.4494	20.4962	20.1903	20.1441
0.890076	-0.868503	AT5G55480.1 | Symbols: SVL1 | SHV3-like 1 | chr5:22474277-22477819 FORWARD LENGTH=766	AT5G55480.1	AT5G55480.1		11	11	11	18.1	18.1	18.1	84.164	0	75.781	374920000	71	22.2692	22.2235	21.0236	20.9618	20.8706	20.284	20.1991	21.6504
5.09745	-0.868856	AT1G62740.1 | Symbols: Hop2 | stress-inducible protein, putative | chr1:23231026-23233380 FORWARD LENGTH=571	AT1G62740.1	AT1G62740.1		38	38	36	66	66	63.6	64.519	0	323.31	7059200000	494	25.8384	25.7575	25.7726	25.9216	24.891	24.8768	25.0916	24.9553
1.56053	-0.871705	AT4G36350.1 | Symbols: ATPAP25, PAP25 | purple acid phosphatase 25 | chr4:17173737-17175857 REVERSE LENGTH=466	AT4G36350.1;AT1G56360.1	AT4G36350.1		28	28	28	65.7	65.7	65.7	52.969	0	323.31	10656000000	464	26.7466	26.2899	26.9532	25.9793	25.2515	26.1339	25.3287	25.768
1.93353	-0.872668	AT5G03740.1 | Symbols: HD2C, HDT3 | histone deacetylase 2C | chr5:981994-983961 FORWARD LENGTH=294	AT5G03740.1	AT5G03740.1		17	17	17	54.8	54.8	54.8	31.83	0	185.91	2982800000	187	24.5556	24.6599	24.3117	24.7534	23.5034	23.303	24.3369	23.6467
1.96321	-0.874012	AT3G15610.1 | Symbols: | Transducin/WD40 repeat-like superfamily protein | chr3:5291076-5292796 REVERSE LENGTH=341	AT3G15610.1	AT3G15610.1		15	15	5	61.6	61.6	30.8	37.355	0	86.099	604700000	109	23.0124	23.1366	22.2276	22.5535	22.0166	22.0598	21.5472	21.8103
2.30324	-0.874529	AT3G42050.1 | Symbols: | vacuolar ATP synthase subunit H family protein | chr3:14228846-14232228 REVERSE LENGTH=441	AT3G42050.1	AT3G42050.1		14	14	14	44.4	44.4	44.4	50.284	0	186.02	1022700000	125	23.6525	23.5188	23.8258	23.1579	22.2963	22.8985	22.5706	22.8915
3.23837	-0.875269	AT3G20970.1 | Symbols: NFU4, ATNFU2 | NFU domain protein 4 | chr3:7348277-7350069 FORWARD LENGTH=283	AT3G20970.1;AT3G20970.2	AT3G20970.1		9	7	7	46.3	40.6	40.6	30.504	0	161.75	1198900000	57	20.695	21.1422	21.0002	21.1415	20.2235	20.0295	20.2831	19.9417
1.47375	-0.875861	AT1G78850.1 | Symbols: | D-mannose binding lectin protein with Apple-like carbohydrate-binding domain | chr1:29642072-29643397 REVERSE LENGTH=441	AT1G78850.1;AT1G78860.1	AT1G78850.1		22	22	22	55.1	55.1	55.1	49.051	0	230.99	5175100000	345	25.4012	25.8818	26.0756	24.9898	25.198	24.8994	24.4301	24.3174
4.76005	-0.875979	AT5G48970.1 | Symbols: | Mitochondrial substrate carrier family protein | chr5:19857028-19859374 REVERSE LENGTH=339	AT5G48970.1	AT5G48970.1		8	8	7	26.3	26.3	23.3	37.493	0	78.913	174210000	24	21.063	21.0182	20.9867	21.0247	20.2283	20.1442	20.263	19.9532
1.77549	-0.876952	AT1G51590.1 | Symbols: MNS1, MANIB | alpha-mannosidase 1 | chr1:19128315-19132132 REVERSE LENGTH=560;AT1G51590.2 | Symbols: MNS1, MANIB | alpha-mannosidase 1 | chr1:19128315-19131406 REVERSE LENGTH=456	AT1G51590.1;AT1G51590.2	AT1G51590.1;AT1G51590.2		19	19	19	37.5	37.5	37.5	63.531	0	320.37	2688600000	126	21.1476	21.7441	20.7073	20.889	20.3496	20.5982	19.9837	20.0487
1.85037	-0.878843	AT5G55610.1 | Symbols: | unknown protein;LOCATED IN: mitochondrion, chloroplast, plastid, membrane;EXPRESSED IN: 25 plant structures;EXPRESSED DURING: 13 growth stages;Has 1807 Blast hits to 1807 proteins in 277 species: Archae - 0;Bacteria - 0;Meta	AT5G55610.1;AT5G55610.2	AT5G55610.1;AT5G55610.2		10	10	10	35.3	35.3	35.3	36.055	0	87.352	1820900000	85	21.0585	21.2574	21.3352	20.9135	20.4971	20.6099	20.3811	19.5611
1.65798	-0.87904	AT4G35860.1 | Symbols: ATRABB1B, ATGB2, ATRAB2C, GB2 | GTP-binding 2 | chr4:16987118-16988839 REVERSE LENGTH=211;AT4G35860.2 | Symbols: ATRABB1B, ATGB2, ATRAB2C, GB2 | GTP-binding 2 | chr4:16987118-16988587 REVERSE LENGTH=165	AT4G35860.1;AT4G35860.2	AT4G35860.1;AT4G35860.2		12	5	5	70.1	38.9	38.9	23.175	0	80.508	489850000	46	20.99	20.8912	21.0189	21.9656	20.5388	20.166	20.6025	20.0423
2.02687	-0.880739	AT1G48850.1 | Symbols: EMB1144 | chorismate synthase, putative / 5-enolpyruvylshikimate-3-phosphate phospholyase, putative | chr1:18065154-18067956 REVERSE LENGTH=436;AT1G48850.3 | Symbols: EMB1144 | chorismate synthase, putative / 5-enolpyruvylshikimate-3	AT1G48850.1;AT1G48850.3;AT1G48850.2	AT1G48850.1;AT1G48850.3;AT1G48850.2		19	19	19	58.3	58.3	58.3	47.317	0	323.31	9494500000	340	24.4761	24.8066	24.7092	25.3763	23.7747	23.6912	24.2531	24.1262
1.57164	-0.887224	AT3G56070.2 | Symbols: ROC2 | rotamase cyclophilin 2 | chr3:20806987-20807517 REVERSE LENGTH=176;AT3G56070.1 | Symbols: ROC2 | rotamase cyclophilin 2 | chr3:20806987-20807517 REVERSE LENGTH=176	AT3G56070.2;AT3G56070.1	AT3G56070.2;AT3G56070.1		17	16	16	94.3	94.3	94.3	18.92	0	323.31	6509400000	231	21.6476	22.1184	21.4855	22.464	20.6862	20.7326	21.1854	21.5625
2.10973	-0.890052	AT1G50380.1 | Symbols: | Prolyl oligopeptidase family protein | chr1:18662480-18666185 FORWARD LENGTH=710	AT1G50380.1	AT1G50380.1		19	19	19	43.5	43.5	43.5	80.938	0	140.34	644840000	105	23.4244	24.0993	23.5036	23.3738	22.6052	22.4397	23.1451	22.6509
1.25397	-0.892411	AT2G03430.1 | Symbols: | Ankyrin repeat family protein | chr2:1036192-1037536 REVERSE LENGTH=240	AT2G03430.1	AT2G03430.1		4	4	4	26.2	26.2	26.2	25.921	0	30.833	140200000	28	20.9609	20.6248	21.1149	22.3101	20.5761	20.2276	20.2155	20.4218
2.63058	-0.893656	AT2G35795.1 | Symbols: | Chaperone DnaJ-domain superfamily protein | chr2:15042321-15043334 FORWARD LENGTH=112	AT2G35795.1	AT2G35795.1		4	4	3	45.5	45.5	37.5	11.997	0	12.289	236510000	26	21.1354	20.8116	21.017	20.9907	20.234	20.1376	20.3816	19.6267
1.18897	-0.895246	AT5G11850.1 | Symbols: | Protein kinase superfamily protein | chr5:3816632-3821024 REVERSE LENGTH=880	AT5G11850.1	AT5G11850.1		9	9	7	19.1	19.1	16.4	97.881	0	113.78	237270000	43	22.463	21.1231	20.8174	21.0961	20.5787	20.7402	20.5323	20.0676
1.72997	-0.90069	AT4G05160.1 | Symbols: | AMP-dependent synthetase and ligase family protein | chr4:2664451-2666547 FORWARD LENGTH=544	AT4G05160.1	AT4G05160.1		23	23	23	50.7	50.7	50.7	59.849	0	323.31	2817500000	196	20.7814	20.8614	21.162	20.9322	20.4369	19.2584	20.3573	20.0817
3.71244	-0.901052	AT5G56940.1 | Symbols: | Ribosomal protein S16 family protein | chr5:23030879-23032200 FORWARD LENGTH=135	AT5G56940.1	AT5G56940.1		7	7	7	52.6	52.6	52.6	15.101	0	69.11	764590000	59	21.1395	20.8806	21.1597	20.9499	20.3335	20.2222	19.9907	19.9791
0.680671	-0.905039	AT4G34660.1 | Symbols: | SH3 domain-containing protein | chr4:16545595-16548294 REVERSE LENGTH=368;AT4G34660.3 | Symbols: | SH3 domain-containing protein | chr4:16545595-16548294 REVERSE LENGTH=317;AT4G34660.2 | Symbols: | SH3 domain-containing protein	AT4G34660.1;AT4G34660.3;AT4G34660.2	AT4G34660.1;AT4G34660.3;AT4G34660.2		9	9	9	29.1	29.1	29.1	40.925	0	45.799	227850000	26	20.9303	23.4405	20.8004	21.0003	20.9368	20.522	20.6248	20.4677
3.52594	-0.910261	AT4G23620.1 | Symbols: | Ribosomal protein L25/Gln-tRNA synthetase, anti-codon-binding domain | chr4:12315016-12316659 REVERSE LENGTH=264;AT4G23620.2 | Symbols: | Ribosomal protein L25/Gln-tRNA synthetase, anti-codon-binding domain | chr4:12315016-123166	AT4G23620.1;AT4G23620.2	AT4G23620.1;AT4G23620.2		14	14	14	45.1	45.1	45.1	29.017	0	210.83	2005000000	103	20.9392	20.9835	20.9917	20.9646	20.2721	20.1796	19.7174	20.0688
1.84619	-0.911602	AT1G49340.2 | Symbols: ATPI4K ALPHA | Phosphatidylinositol 3- and 4-kinase family protein | chr1:18252355-18263967 FORWARD LENGTH=2028;AT1G49340.1 | Symbols: ATPI4K ALPHA | Phosphatidylinositol 3- and 4-kinase family protein | chr1:18252355-18263967 FORWAR	AT1G49340.2;AT1G49340.1	AT1G49340.2;AT1G49340.1		17	17	17	13.7	13.7	13.7	224.01	0	52.715	279030000	51	21.9874	20.7572	21.103	21.2671	20.4613	20.416	20.4158	20.1752
2.13625	-0.913095	AT5G50250.1 | Symbols: CP31B | chloroplast RNA-binding protein 31B | chr5:20452677-20453965 REVERSE LENGTH=289	AT5G50250.1	AT5G50250.1		6	6	6	31.1	31.1	31.1	31.869	0	62.486	495180000	33	20.8924	20.8287	21.3539	21.0666	20.5494	20.2624	20.0668	19.6107
4.50372	-0.913144	AT5G08580.1 | Symbols: | Calcium-binding EF hand family protein | chr5:2780976-2782961 REVERSE LENGTH=391	AT5G08580.1	AT5G08580.1		9	9	9	32.2	32.2	32.2	45.845	0	35.171	378350000	41	21.0632	21.0444	20.9652	21.1731	20.0085	20.299	20.0523	20.2335
3.32018	-0.919185	AT1G50370.1 | Symbols: | Calcineurin-like metallo-phosphoesterase superfamily protein | chr1:18658894-18661672 FORWARD LENGTH=303	AT1G50370.1	AT1G50370.1		13	13	1	56.1	56.1	5.3	34.819	0	133.82	896110000	129	23.4239	23.5003	23.3797	23.2145	22.3674	22.5179	22.1953	22.7611
1.15935	-0.920673	AT1G79230.1 | Symbols: ST1, ATMST1, MST1, ATRDH1, STR1 | mercaptopyruvate sulfurtransferase 1 | chr1:29800824-29803679 FORWARD LENGTH=379;AT1G79230.3 | Symbols: ST1, ATMST1, MST1, ATRDH1 | mercaptopyruvate sulfurtransferase 1 | chr1:29801358-29803679 FORWA	AT1G79230.1;AT1G79230.3;AT1G79230.2	AT1G79230.1;AT1G79230.3;AT1G79230.2		25	25	25	77.3	77.3	77.3	41.893	0	323.31	23767000000	510	23.2643	23.6135	23.4256	24.2135	21.739	22.6371	23.0262	23.4319
1.29144	-0.92093	AT5G57655.2 | Symbols: | xylose isomerase family protein | chr5:23347030-23349805 FORWARD LENGTH=477;AT5G57655.1 | Symbols: | xylose isomerase family protein | chr5:23347030-23348720 FORWARD LENGTH=287	AT5G57655.2;AT5G57655.1	AT5G57655.2;AT5G57655.1		17	17	17	45.9	45.9	45.9	53.719	0	107.81	1158100000	97	21.0415	21.0663	21.0162	22.5145	20.6072	20.6726	20.3333	20.3416
3.26814	-0.926807	AT3G59820.1 | Symbols: | LETM1-like protein | chr3:22098306-22101759 REVERSE LENGTH=755;AT3G59820.2 | Symbols: | LETM1-like protein | chr3:22098289-22101759 REVERSE LENGTH=760	AT3G59820.1;AT3G59820.2	AT3G59820.1;AT3G59820.2		27	27	27	38.7	38.7	38.7	85.734	0	323.31	4214700000	183	21.1155	20.8603	21.3807	21.0244	20.402	20.1901	20.0535	20.0281
1.23965	-0.927185	AT2G45630.2 | Symbols: | D-isomer specific 2-hydroxyacid dehydrogenase family protein | chr2:18796000-18797089 FORWARD LENGTH=338	AT2G45630.2;AT2G45630.1;AT5G28310.1	AT2G45630.2		7	7	7	30.5	30.5	30.5	36.84	0	47.617	199650000	32	20.91	20.7645	20.9184	22.3765	20.5846	20.1501	20.4105	20.1154
0.85266	-0.93018	AT2G37550.2 | Symbols: ASP1, AGD7 | ARF-GAP domain 7 | chr2:15755544-15757456 REVERSE LENGTH=456;AT2G37550.1 | Symbols: ASP1, AGD7 | ARF-GAP domain 7 | chr2:15755544-15757456 REVERSE LENGTH=456	AT2G37550.2;AT2G37550.1	AT2G37550.2;AT2G37550.1		6	6	5	22.6	22.6	20	49.251	0	83.383	337430000	45	20.9323	20.4425	21.0872	22.8864	20.5903	20.4809	20.5033	20.0532
1.14262	-0.935175	AT1G04270.2 | Symbols: RPS15 | cytosolic ribosomal protein S15 | chr1:1141852-1142960 REVERSE LENGTH=151;AT1G04270.1 | Symbols: RPS15 | cytosolic ribosomal protein S15 | chr1:1141852-1142960 REVERSE LENGTH=152	AT1G04270.2;AT1G04270.1;AT5G43640.1;AT5G09500.1;AT5G09490.1;AT1G33850.1	AT1G04270.2;AT1G04270.1		10	2	2	73.5	11.3	11.3	17.058	0	30.066	1374300000	72	24.7636	24.4342	25.2014	25.9367	23.7991	24.1794	24.9277	23.689
2.35338	-0.93623	AT2G38960.1 | Symbols: AERO2, ERO2 | endoplasmic reticulum oxidoreductins 2 | chr2:16265455-16267883 FORWARD LENGTH=472;AT2G38960.2 | Symbols: AERO2, ERO2 | endoplasmic reticulum oxidoreductins 2 | chr2:16265455-16267792 FORWARD LENGTH=478;AT2G38960.3 | Sy	AT2G38960.1;AT2G38960.2;AT2G38960.3;AT1G72280.1	AT2G38960.1;AT2G38960.2;AT2G38960.3		14	14	14	31.4	31.4	31.4	53.448	0	207.2	867840000	69	21.1043	21.0587	21.1205	21.758	20.5176	20.5688	20.0312	20.1791
3.05509	-0.936853	AT3G47520.1 | Symbols: MDH | malate dehydrogenase | chr3:17513657-17514868 FORWARD LENGTH=403	AT3G47520.1	AT3G47520.1		27	27	25	76.2	76.2	76.2	42.405	0	323.31	22367000000	513	26.1434	26.2388	26.0172	26.5111	24.9834	25.3203	25.3379	25.5215
1.30697	-0.937924	AT3G44620.1 | Symbols: | protein tyrosine phosphatases;protein tyrosine phosphatases | chr3:16193858-16195422 FORWARD LENGTH=239;AT3G44620.2 | Symbols: | protein tyrosine phosphatases;protein tyrosine phosphatases | chr3:16193858-16195422 FORWARD LENGTH=	AT3G44620.1;AT3G44620.2	AT3G44620.1;AT3G44620.2		4	4	4	20.9	20.9	20.9	26.95	0	11.803	192830000	38	21.0698	20.9496	21.2658	22.3735	20.8339	20.7555	20.3385	19.9792
0.796473	-0.941337	AT1G12920.1 | Symbols: ERF1-2 | eukaryotic release factor 1-2 | chr1:4396555-4397859 REVERSE LENGTH=434	AT1G12920.1	AT1G12920.1		8	8	2	23.5	23.5	5.1	48.941	0	38.685	263210000	40	23.0845	20.5083	21.2171	20.9738	20.5338	20.8419	20.5566	20.0861
1.21139	-0.942384	AT1G16520.1 | Symbols: | unknown protein;FUNCTIONS IN: molecular_function unknown;INVOLVED IN: biological_process unknown;LOCATED IN: plasma membrane;EXPRESSED IN: 22 plant structures;EXPRESSED DURING: 13 growth stages;BEST Arabidopsis thaliana prot	AT1G16520.1	AT1G16520.1		4	4	4	18.5	18.5	18.5	36.426	0	19.117	157730000	38	20.6461	21.7428	20.7049	22.2892	20.46	20.1945	20.3909	20.5681
2.28275	-0.945677	AT4G31340.2 | Symbols: | myosin heavy chain-related | chr4:15205662-15208895 FORWARD LENGTH=420;AT4G31340.1 | Symbols: | myosin heavy chain-related | chr4:15205662-15208950 FORWARD LENGTH=437	AT4G31340.2;AT4G31340.1	AT4G31340.2;AT4G31340.1		19	19	19	50.2	50.2	50.2	47.739	0	134.61	1591800000	98	20.8651	21.1102	21.3495	21.5383	20.6818	20.3963	20.01	19.9924
1.78681	-0.948761	AT5G55280.1 | Symbols: FTSZ1-1, ATFTSZ1-1, CPFTSZ | homolog of bacterial cytokinesis Z-ring protein FTSZ 1-1 | chr5:22420740-22422527 REVERSE LENGTH=433	AT5G55280.1	AT5G55280.1		14	14	14	45.7	45.7	45.7	45.564	0	276.17	1363800000	132	20.8492	22.1526	21.2112	21.1317	20.3783	20.4057	20.2639	20.5017
1.21764	-0.949722	AT4G17890.1 | Symbols: AGD8 | ARF-GAP domain 8 | chr4:9937121-9939146 FORWARD LENGTH=413;AT4G17890.2 | Symbols: AGD8 | ARF-GAP domain 8 | chr4:9937121-9938988 FORWARD LENGTH=384	AT4G17890.1;AT4G17890.2	AT4G17890.1;AT4G17890.2		11	9	9	45	39.7	39.7	44.441	0	80.52	369000000	53	21.9659	22.1599	20.9473	20.7041	20.9587	20.5676	20.4395	20.0125
0.798868	-0.950054	AT4G22530.1 | Symbols: | S-adenosyl-L-methionine-dependent methyltransferases superfamily protein | chr4:11859247-11860129 REVERSE LENGTH=261	AT4G22530.1	AT4G22530.1		6	6	6	54.4	54.4	54.4	29.106	0	27.54	196950000	30	20.8604	23.2049	20.9166	20.8896	20.3347	20.6025	20.8093	20.3249
1.91538	-0.958628	AT2G16640.1 | Symbols: ATTOC132, TOC132 | multimeric translocon complex in the outer envelope membrane 132 | chr2:7211489-7215109 REVERSE LENGTH=1206	AT2G16640.1	AT2G16640.1		20	20	14	23.3	23.3	17.9	132.28	0	114.45	1082100000	139	21.0568	20.958	21.1356	20.7865	20.5033	20.3999	19.4015	19.7977
2.36502	-0.962167	AT3G50590.1 | Symbols: | Transducin/WD40 repeat-like superfamily protein | chr3:18771292-18779220 FORWARD LENGTH=1614	AT3G50590.1	AT3G50590.1		11	11	11	10.1	10.1	10.1	176.3	0	80.23	213900000	40	21.1978	21.8308	21.1466	20.9493	20.3509	20.3822	20.5094	20.0333
2.60539	-0.963578	AT1G25350.1 | Symbols: OVA9 | glutamine-tRNA ligase, putative / glutaminyl-tRNA synthetase, putative / GlnRS, putative | chr1:8889280-8894205 REVERSE LENGTH=795;AT1G25350.2 | Symbols: OVA9 | glutamine-tRNA ligase, putative / glutaminyl-tRNA synthetase, put	AT1G25350.1;AT1G25350.2	AT1G25350.1;AT1G25350.2		20	20	20	33.7	33.7	33.7	91.246	0	71.714	547250000	66	22.901	23.1185	23.3237	23.1572	22.4581	21.674	22.338	22.176
2.0249	-0.964389	AT3G56490.1 | Symbols: HIT3, HINT1 | HIS triad family protein 3 | chr3:20941532-20943129 FORWARD LENGTH=147	AT3G56490.1	AT3G56490.1		13	13	13	88.4	88.4	88.4	16	0	189.83	4437800000	190	25.7628	25.8873	25.5047	25.4818	24.8531	25.2378	24.1126	24.5757
2.05548	-0.964731	AT4G10050.1 | Symbols: | esterase/lipase/thioesterase family protein | chr4:6284620-6287186 REVERSE LENGTH=350	AT4G10050.1	AT4G10050.1		2	2	2	10.3	10.3	10.3	38.562	0	9.811	92640000	24	21.8073	21.8679	21.1211	21.1315	20.9281	20.4885	20.4167	20.2356
2.0048	-0.965696	AT3G58140.1 | Symbols: | phenylalanyl-tRNA synthetase class IIc family protein | chr3:21529988-21532386 REVERSE LENGTH=429	AT3G58140.1	AT3G58140.1		17	17	17	50.3	50.3	50.3	49.251	0	242.98	1883600000	150	20.9551	22.0138	21.3089	20.9789	20.4545	20.3531	20.4691	20.1172
2.30936	-0.97209	AT4G18480.1 | Symbols: CHLI1, CH42, CH-42, CHL11, CHLI-1 | P-loop containing nucleoside triphosphate hydrolases superfamily protein | chr4:10201897-10203361 REVERSE LENGTH=424	AT4G18480.1	AT4G18480.1		21	21	10	48.1	48.1	25.7	46.269	0	278.17	1911500000	183	20.958	21.9361	21.616	21.1986	20.4467	20.6134	20.3715	20.3888
1.89564	-0.977074	AT3G49600.1 | Symbols: UBP26, SUP32, ATUBP26 | ubiquitin-specific protease 26 | chr3:18380942-18386662 REVERSE LENGTH=1067	AT3G49600.1	AT3G49600.1		5	5	5	7.3	7.3	7.3	119.93	0	8.8729	47237000	14	21.1295	22.0526	20.9894	21.1253	20.5574	20.274	20.0025	20.5546
1.1562	-0.977478	AT5G06110.2 | Symbols: | DnaJ domain;Myb-like DNA-binding domain | chr5:1841009-1843000 REVERSE LENGTH=663;AT5G06110.1 | Symbols: | DnaJ domain;Myb-like DNA-binding domain | chr5:1841009-1843000 REVERSE LENGTH=663	AT5G06110.2;AT5G06110.1	AT5G06110.2;AT5G06110.1		13	13	9	30	30	24.3	75.632	0	74.764	268710000	37	20.7978	22.6999	21.0726	21.1616	20.3626	20.571	20.6971	20.1914
1.42638	-0.978436	AT3G16110.1 | Symbols: ATPDIL1-6, ATPDI4, PDI4, PDIL1-6 | PDI-like 1-6 | chr3:5460955-5463666 REVERSE LENGTH=534	AT3G16110.1	AT3G16110.1		15	15	13	37.6	37.6	33.5	59.57	0	116.78	1007200000	94	20.8922	20.9727	21.1878	22.4566	20.4935	20.3593	20.2994	20.4432
5.23827	-0.979114	AT2G45240.1 | Symbols: MAP1A | methionine aminopeptidase 1A | chr2:18656059-18658906 FORWARD LENGTH=398	AT2G45240.1	AT2G45240.1		28	28	28	86.4	86.4	86.4	43.992	0	323.31	5626000000	349	26.1412	26.0589	25.8761	26.0672	25.0362	25.0103	25.157	25.0234
2.14472	-0.980574	AT5G59840.1 | Symbols: | Ras-related small GTP-binding family protein | chr5:24107450-24109049 REVERSE LENGTH=216	AT5G59840.1	AT5G59840.1		17	15	2	67.6	64.8	15.7	23.834	0	162.39	2785000000	171	24.2787	23.705	24.4754	24.4602	23.4133	22.8408	23.1386	23.6043
1.55879	-0.981847	AT1G14710.2 | Symbols: | hydroxyproline-rich glycoprotein family protein | chr1:5062168-5064697 REVERSE LENGTH=601;AT1G14710.1 | Symbols: | hydroxyproline-rich glycoprotein family protein | chr1:5062168-5064697 REVERSE LENGTH=601	AT1G14710.2;AT1G14710.1	AT1G14710.2;AT1G14710.1		8	8	8	17.5	17.5	17.5	66.203	0	25.108	150490000	33	22.2602	20.7226	21.087	21.118	20.477	20.3413	20.2693	20.1728
1.04559	-0.983224	AT5G55530.3 | Symbols: | Calcium-dependent lipid-binding (CaLB domain) family protein | chr5:22494439-22495656 FORWARD LENGTH=405;AT5G55530.2 | Symbols: | Calcium-dependent lipid-binding (CaLB domain) family protein | chr5:22494439-22495656 FORWARD LENGT	AT5G55530.3;AT5G55530.2;AT5G55530.1	AT5G55530.3;AT5G55530.2;AT5G55530.1		4	4	4	15.6	15.6	15.6	44.126	0	11.884	146260000	27	20.8078	22.7429	20.7224	20.9389	20.4085	20.122	20.3241	20.4244
0.888354	-0.983291	AT3G09800.1 | Symbols: | SNARE-like superfamily protein | chr3:3006731-3007916 REVERSE LENGTH=179	AT3G09800.1	AT3G09800.1		4	4	4	28.5	28.5	28.5	19.752	0	33.574	259100000	31	23.0842	20.7884	20.7786	21.1201	20.7107	20.4215	20.3721	20.3338
2.33679	-0.984603	AT1G74230.1 | Symbols: GR-RBP5 | glycine-rich RNA-binding protein 5 | chr1:27915346-27916857 FORWARD LENGTH=289	AT1G74230.1	AT1G74230.1		10	10	10	26.6	26.6	26.6	28.728	0	323.31	8915100000	166	21.3665	20.7265	21.3169	21.5692	20.5671	20.1782	20.3511	19.9442
1.35088	-0.986656	AT3G61220.1 | Symbols: | NAD(P)-binding Rossmann-fold superfamily protein | chr3:22663025-22664316 FORWARD LENGTH=296;AT3G61220.2 | Symbols: | NAD(P)-binding Rossmann-fold superfamily protein | chr3:22663025-22664316 FORWARD LENGTH=303	AT3G61220.1;AT3G61220.2	AT3G61220.1;AT3G61220.2		4	3	3	26.7	24	24	32.803	0	13.046	98527000	24	20.6824	20.7144	22.1885	20.9545	19.8497	20.355	20.4791	19.9095
1.28156	-0.987238	AT1G32200.2 | Symbols: ATS1, ACT1 | phospholipid/glycerol acyltransferase family protein | chr1:11602223-11605001 REVERSE LENGTH=459;AT1G32200.1 | Symbols: ATS1, ACT1 | phospholipid/glycerol acyltransferase family protein | chr1:11602223-11605001 REVERSE L	AT1G32200.2;AT1G32200.1	AT1G32200.2;AT1G32200.1		14	14	14	56.2	56.2	56.2	50.421	0	242.3	1639600000	148	20.9299	20.6157	21.0114	22.3792	20.5887	20.1821	20.1849	20.0316
1.06738	-0.992601	AT5G47010.1 | Symbols: UPF1, LBA1, ATUPF1 | RNA helicase, putative | chr5:19072009-19078856 FORWARD LENGTH=1254	AT5G47010.1	AT5G47010.1		18	18	18	24.2	24.2	24.2	136.87	0	78.737	438880000	89	22.8408	22.8688	23.104	23.2706	20.6271	22.4887	22.3317	22.6663
3.09606	-1.00064	AT4G25130.1 | Symbols: PMSR4 | peptide met sulfoxide reductase 4 | chr4:12898802-12899998 REVERSE LENGTH=258	AT4G25130.1	AT4G25130.1		5	5	5	15.1	15.1	15.1	28.644	0	41.411	503870000	57	21.5533	21.3897	21.135	21.6811	20.5533	20.4725	20.1209	20.6098
0.858423	-1.00657	AT2G26670.1 | Symbols: HY1, ATHO1, HO1, TED4, GUN2, HY6 | Plant haem oxygenase (decyclizing) family protein | chr2:11341816-11343394 FORWARD LENGTH=282	AT2G26670.1;AT2G26670.2	AT2G26670.1		7	7	6	36.9	36.9	34.4	32.691	0	53.532	715510000	70	20.52	23.145	21.1273	21.0178	20.6885	20.4993	20.4291	20.1669
0.972991	-1.00958	AT3G53460.3 | Symbols: CP29 | chloroplast RNA-binding protein 29 | chr3:19819738-19821423 REVERSE LENGTH=342;AT3G53460.2 | Symbols: CP29 | chloroplast RNA-binding protein 29 | chr3:19819738-19821423 REVERSE LENGTH=342;AT3G53460.1 | Symbols: CP29 | chloropl	AT3G53460.3;AT3G53460.2;AT3G53460.1;AT3G53460.4	AT3G53460.3;AT3G53460.2;AT3G53460.1;AT3G53460.4		7	7	7	24.3	24.3	24.3	36.007	0	323.31	1180600000	91	20.6798	22.9387	20.9777	21.1712	20.4051	20.2133	20.8758	20.235
0.712063	-1.0161	AT1G50600.1 | Symbols: SCL5 | scarecrow-like 5 | chr1:18737398-18739547 REVERSE LENGTH=597	AT1G50600.1;AT2G04890.1;AT5G48150.2;AT5G48150.1	AT1G50600.1		9	9	9	23.5	23.5	23.5	66.641	0	87.831	350730000	60	22.817	23.0505	22.7396	20.8752	20.3775	22.1133	20.6861	22.2409
0.96946	-1.01684	AT4G25530.1 | Symbols: FWA, HDG6 | FLOWERING WAGENINGEN | chr4:13039312-13042242 FORWARD LENGTH=686	AT4G25530.1	AT4G25530.1		12	12	12	34.5	34.5	34.5	76.252	0	53.797	263610000	41	20.6307	20.9807	20.6605	22.8613	20.2384	20.1582	20.4879	20.1812
3.69785	-1.01801	AT4G23100.1 | Symbols: RML1, PAD2, GSH1, CAD2, ATECS1, GSHA | glutamate-cysteine ligase | chr4:12103458-12106751 REVERSE LENGTH=522;AT4G23100.3 | Symbols: GSH1 | glutamate-cysteine ligase | chr4:12103458-12106751 REVERSE LENGTH=522;AT4G23100.2 | Symbols: R	AT4G23100.1;AT4G23100.3;AT4G23100.2	AT4G23100.1;AT4G23100.3;AT4G23100.2		24	24	24	49.4	49.4	49.4	58.562	0	323.31	3315100000	234	21.3331	21.2743	21.228	21.7342	20.3474	20.5122	20.3741	20.2637
4.362	-1.02391	AT3G59920.1 | Symbols: ATGDI2, GDI2 | RAB GDP dissociation inhibitor 2 | chr3:22135157-22138221 FORWARD LENGTH=444	AT3G59920.1	AT3G59920.1		33	33	23	73.4	73.4	56.1	49.538	0	323.31	13561000000	584	26.7252	26.8606	26.7294	26.7922	25.9417	25.8707	25.5492	25.6501
2.17402	-1.03451	AT4G33510.1 | Symbols: DHS2 | 3-deoxy-d-arabino-heptulosonate 7-phosphate synthase | chr4:16116496-16118549 FORWARD LENGTH=507;AT4G33510.2 | Symbols: DHS2 | 3-deoxy-d-arabino-heptulosonate 7-phosphate synthase | chr4:16116496-16118233 FORWARD LENGTH=432	AT4G33510.1;AT4G33510.2	AT4G33510.1;AT4G33510.2		18	13	13	48.3	39.8	39.8	56.148	0	179.63	1224900000	127	21.4143	21.8192	20.8958	21.9354	20.622	20.6798	20.3472	20.2776
2.01638	-1.03527	AT5G08160.1 | Symbols: ATPK3, PK3 | serine/threonine protein kinase 3 | chr5:2625903-2627942 REVERSE LENGTH=347;AT5G08160.2 | Symbols: ATPK3, PK3 | serine/threonine protein kinase 3 | chr5:2625903-2627942 REVERSE LENGTH=311	AT5G08160.1;AT5G08160.2	AT5G08160.1;AT5G08160.2		9	9	9	40.3	40.3	40.3	38.636	0	105.44	531100000	70	21.6086	22.1416	21.1978	20.935	20.3423	20.4128	20.6849	20.3019
1.34654	-1.03742	AT1G32490.1 | Symbols: EMB2733, ESP3 | RNA helicase family protein | chr1:11742356-11749286 REVERSE LENGTH=1044;AT1G32490.2 | Symbols: ESP3 | RNA helicase family protein | chr1:11742356-11749286 REVERSE LENGTH=1034	AT1G32490.1;AT1G32490.2;AT2G35340.1	AT1G32490.1;AT1G32490.2		11	11	11	17.7	17.7	17.7	118.83	0	27.315	102140000	32	21.787	22.3169	20.851	20.7219	20.5939	20.5824	20.406	19.9449
6.04793	-1.04248	AT4G39260.1 | Symbols: CCR1, ATGRP8, GR-RBP8, GRP8 | cold, circadian rhythm, and RNA binding 1 | chr4:18274166-18274958 REVERSE LENGTH=169;AT4G39260.3 | Symbols: CCR1, ATGRP8, GR-RBP8, GRP8 | cold, circadian rhythm, and RNA binding 1 | chr4:18274166-182749	AT4G39260.1;AT4G39260.3;AT4G39260.2;AT4G39260.4	AT4G39260.1;AT4G39260.3;AT4G39260.2;AT4G39260.4		14	14	11	73.4	73.4	65.7	16.578	0	323.31	29589000000	436	28.656	28.6363	28.5576	28.6589	27.471	27.6218	27.563	27.6832
2.81204	-1.05007	AT5G20950.2 | Symbols: | Glycosyl hydrolase family protein | chr5:7107609-7110775 REVERSE LENGTH=624;AT5G20950.1 | Symbols: | Glycosyl hydrolase family protein | chr5:7107609-7110775 REVERSE LENGTH=624	AT5G20950.2;AT5G20950.1;AT3G47050.2;AT3G47050.1	AT5G20950.2;AT5G20950.1		17	17	16	38.1	38.1	36.5	67.926	0	90.562	1049600000	128	24.0801	23.6263	24.0828	24.1369	22.5497	23.1924	23.1484	22.8353
0.851898	-1.0533	AT5G55940.1 | Symbols: emb2731 | Uncharacterised protein family (UPF0172) | chr5:22656256-22657894 REVERSE LENGTH=208	AT5G55940.1	AT5G55940.1		6	6	6	40.9	40.9	40.9	22.979	0	31.563	426480000	30	21.0103	23.414	20.8835	20.9728	20.3476	20.706	20.5996	20.4142
1.47731	-1.05627	AT4G01400.2 | Symbols: | FUNCTIONS IN: molecular_function unknown;INVOLVED IN: biological_process unknown;LOCATED IN: cellular_component unknown;EXPRESSED IN: 23 plant structures;EXPRESSED DURING: 15 growth stages;CONTAINS InterPro DOMAIN/s: COG4 tra	AT4G01400.2;AT4G01400.1	AT4G01400.2;AT4G01400.1		20	20	20	44.7	44.7	44.7	82.977	0	82.426	410090000	74	20.6179	22.2583	20.7619	21.3409	20.398	20.263	20.1433	19.9496
1.44981	-1.05968	AT1G07670.1 | Symbols: ATECA4, ECA4 | endomembrane-type CA-ATPase 4 | chr1:2370305-2374196 REVERSE LENGTH=1061	AT1G07670.1	AT1G07670.1		19	19	5	24.1	24.1	7.2	116.18	0	177.16	1029100000	93	21.0466	20.8897	22.2726	21.3195	20.9673	20.2577	20.2625	19.8023
2.06792	-1.06255	AT1G09760.1 | Symbols: U2A | U2 small nuclear ribonucleoprotein A | chr1:3159476-3161603 REVERSE LENGTH=249	AT1G09760.1	AT1G09760.1		11	11	11	55	55	55	28.041	0	154.38	648250000	80	24.5564	24.1013	24.2753	23.6667	22.5915	22.9517	23.5407	23.2656
2.8669	-1.06368	AT3G02920.1 | Symbols: RPA32B, ATRPA32B | Replication protein A, subunit RPA32 | chr3:651844-654189 REVERSE LENGTH=278;AT3G02920.2 | Symbols: RPA32B | Replication protein A, subunit RPA32 | chr3:651844-654189 REVERSE LENGTH=298	AT3G02920.1;AT3G02920.2	AT3G02920.1;AT3G02920.2		2	2	2	6.5	6.5	6.5	30.957	0.0013057	3.1036	49585000	22	21.5822	21.6207	21.429	21.0461	20.4958	20.6158	20.3239	19.9877
1.51098	-1.0693	AT1G28120.1 | Symbols: | CONTAINS InterPro DOMAIN/s: Ovarian tumour, otubain (InterPro:IPR003323), Ubiquitin thioesterase Otubain (InterPro:IPR016615), Peptidase C65, otubain (InterPro:IPR019400);Has 413 Blast hits to 411 proteins in 139 species: Archae	AT1G28120.1	AT1G28120.1		3	3	3	18.6	18.6	18.6	34.434	0	32.763	128960000	31	21.7598	20.8148	22.3832	20.8634	20.4385	20.2829	20.3369	20.4857
1.74587	-1.07146	AT2G47680.1 | Symbols: | zinc finger (CCCH type) helicase family protein | chr2:19545828-19550871 REVERSE LENGTH=1015	AT2G47680.1	AT2G47680.1		12	12	12	17.7	17.7	17.7	115.08	0	23.541	172080000	38	20.9444	22.068	20.9912	22.0576	20.2538	20.7092	20.4852	20.3271
1.33432	-1.07654	AT1G02130.1 | Symbols: ATRAB1B, ARA5, ARA-5, ATRABD2A, RABD2A, RA-5 | RAS 5 | chr1:400350-401788 REVERSE LENGTH=203	AT1G02130.1	AT1G02130.1		11	6	6	55.7	35.5	35.5	22.648	0	41.636	423080000	57	22.4679	20.7377	21.0842	21.1762	20.8887	19.994	20.1749	20.1022
2.67508	-1.0774	AT1G67930.1 | Symbols: | Golgi transport complex protein-related | chr1:25474218-25477332 REVERSE LENGTH=832	AT1G67930.1	AT1G67930.1		11	11	11	27.6	27.6	27.6	91.65	0	104.77	308190000	56	21.8113	21.1248	21.2995	21.1245	20.4802	20.4902	19.9683	20.1118
2.25524	-1.07871	AT1G78060.1 | Symbols: | Glycosyl hydrolase family protein | chr1:29349796-29352868 REVERSE LENGTH=767	AT1G78060.1	AT1G78060.1		37	37	37	67.4	67.4	67.4	83.891	0	323.31	4300700000	405	24.9179	24.4781	24.86	24.7594	23.7721	24.2905	23.4366	23.2013
1.07472	-1.08493	AT3G51310.1 | Symbols: VPS35C | VPS35 homolog C | chr3:19044634-19049321 REVERSE LENGTH=790	AT3G51310.1	AT3G51310.1		10	10	10	22.8	22.8	22.8	89.404	0	199.67	413070000	63	22.8539	20.7577	21.1183	20.954	20.5237	20.732	20.3084	19.78
1.2832	-1.08634	AT2G04350.2 | Symbols: LACS8 | AMP-dependent synthetase and ligase family protein | chr2:1516086-1519178 FORWARD LENGTH=720;AT2G04350.1 | Symbols: LACS8 | AMP-dependent synthetase and ligase family protein | chr2:1516086-1519178 FORWARD LENGTH=720	AT2G04350.2;AT2G04350.1	AT2G04350.2;AT2G04350.1		26	24	24	54.7	51.9	51.9	78.342	0	279.51	1546600000	126	22.3966	20.6471	21.0641	21.8274	20.7616	20.6932	20.3499	19.7852
1.0937	-1.09632	AT2G37220.1 | Symbols: | RNA-binding (RRM/RBD/RNP motifs) family protein | chr2:15634980-15636331 REVERSE LENGTH=289	AT2G37220.1	AT2G37220.1		9	9	9	45.3	45.3	45.3	30.718	0	323.31	1574000000	113	20.9056	20.6548	21.2111	22.8156	20.8448	20.0138	20.2784	20.065
3.46559	-1.11365	AT5G25757.1 | Symbols: | RNA polymerase I-associated factor PAF67 | chr5:8965515-8967460 REVERSE LENGTH=514;AT5G25754.1 | Symbols: | RNA polymerase I-associated factor PAF67 | chr5:8953564-8955511 FORWARD LENGTH=514	AT5G25757.1;AT5G25754.1	AT5G25757.1;AT5G25754.1		25	25	25	48.6	48.6	48.6	60.182	0	245.13	2610800000	270	24.5936	24.7191	24.5218	24.0381	23.3254	23.4564	23.3336	23.3026
1.26596	-1.11599	AT4G17100.1 | Symbols: | CONTAINS InterPro DOMAIN/s: Endoribonuclease XendoU (InterPro:IPR018998);Has 943 Blast hits to 770 proteins in 162 species: Archae - 0;Bacteria - 61;Metazoa - 472;Fungi - 40;Plants - 78;Viruses - 35;Other Eukaryotes - 257 (	AT4G17100.1;AT4G17100.2	AT4G17100.1;AT4G17100.2		6	6	6	25.6	25.6	25.6	49.415	0	41.122	200520000	48	20.7058	22.4109	20.9469	22.1792	20.9225	20.035	20.4829	20.3383
1.19128	-1.12552	AT5G22120.1 | Symbols: | unknown protein;FUNCTIONS IN: molecular_function unknown;INVOLVED IN: biological_process unknown;LOCATED IN: cellular_component unknown;EXPRESSED IN: cultured cell;Has 30201 Blast hits to 17322 proteins in 780 species: Archae	AT5G22120.1	AT5G22120.1		5	5	5	28.5	28.5	28.5	42.092	0	68.675	204980000	25	20.9352	20.791	21.0136	22.7901	20.7165	19.9935	20.2024	20.1154
0.883712	-1.1263	AT2G43910.2 | Symbols: ATHOL1, HOL1 | HARMLESS TO OZONE LAYER 1 | chr2:18184596-18186951 REVERSE LENGTH=246;AT2G43910.1 | Symbols: ATHOL1, HOL1 | HARMLESS TO OZONE LAYER 1 | chr2:18184658-18186951 REVERSE LENGTH=227;AT2G43910.3 | Symbols: ATHOL1, HOL1 | HA	AT2G43910.2;AT2G43910.1;AT2G43910.3	AT2G43910.2;AT2G43910.1;AT2G43910.3		4	4	4	26.8	26.8	26.8	27.408	0	28.918	297630000	40	20.929	23.4481	21.1383	20.7202	20.5667	20.255	20.6473	20.2615
3.27847	-1.1362	AT5G16990.1 | Symbols: | Zinc-binding dehydrogenase family protein | chr5:5581831-5583849 REVERSE LENGTH=343	AT5G16990.1	AT5G16990.1		22	8	7	88.6	47.2	40.5	37.988	0	89.066	1052900000	112	23.8541	24.0772	24.1032	24.0044	22.4322	22.9739	23.1893	22.8986
2.28107	-1.13851	AT5G21990.1 | Symbols: TPR7 | Tetratricopeptide repeat (TPR)-like superfamily protein | chr5:7273395-7276318 FORWARD LENGTH=554	AT5G21990.1	AT5G21990.1		31	31	31	67.9	67.9	67.9	60.757	0	323.31	2362400000	242	20.867	21.1257	21.89	21.8827	20.3006	20.3061	20.4153	20.1894
1.01349	-1.1396	AT3G10300.3 | Symbols: | Calcium-binding EF-hand family protein | chr3:3186436-3188071 FORWARD LENGTH=335;AT3G10300.2 | Symbols: | Calcium-binding EF-hand family protein | chr3:3186436-3187825 FORWARD LENGTH=324;AT3G10300.4 | Symbols: | Calcium-binding	AT3G10300.3;AT3G10300.2;AT3G10300.4;AT3G10300.5	AT3G10300.3;AT3G10300.2;AT3G10300.4		5	5	4	12.8	12.8	8.4	35.302	0	17.514	222880000	38	20.9296	23.3534	21.1444	21.0854	20.4665	20.5054	20.6325	20.35
1.99721	-1.142	AT5G49830.1 | Symbols: EXO84B | exocyst complex component 84B | chr5:20250803-20254766 REVERSE LENGTH=752;AT5G49830.3 | Symbols: EXO84B | exocyst complex component 84B | chr5:20250803-20254766 REVERSE LENGTH=783;AT5G49830.2 | Symbols: EXO84B | exocyst comp	AT5G49830.1;AT5G49830.3;AT5G49830.2	AT5G49830.1;AT5G49830.3;AT5G49830.2		15	15	15	27.1	27.1	27.1	82.747	0	112.84	263800000	52	21.7097	22.3034	21.2258	20.9573	20.6632	20.2659	20.3375	20.3616
0.757696	-1.1471	AT1G48410.1 | Symbols: AGO1 | Stabilizer of iron transporter SufD / Polynucleotidyl transferase | chr1:17886285-17891892 REVERSE LENGTH=1048;AT1G48410.3 | Symbols: AGO1 | Stabilizer of iron transporter SufD / Polynucleotidyl transferase | chr1:17886285-178	AT1G48410.1;AT1G48410.3;AT1G48410.2;AT5G43810.2;AT5G43810.1	AT1G48410.1;AT1G48410.3;AT1G48410.2		21	21	20	26	26	24.4	116.19	0	79.059	931560000	104	23.5315	23.9756	23.9369	23.9317	20.4958	23.2956	23.6527	23.3431
1.36843	-1.14956	AT5G08530.1 | Symbols: CI51 | 51 kDa subunit of complex I | chr5:2759848-2761726 REVERSE LENGTH=486	AT5G08530.1	AT5G08530.1		42	42	42	75.7	75.7	75.7	53.449	0	323.31	9377700000	412	20.9168	20.9876	21.2456	21.109	19.5558	19.8773	19.0782	21.1493
1.68859	-1.1521	AT5G18070.1 | Symbols: DRT101 | phosphoglucosamine mutase-related | chr5:5981117-5982787 FORWARD LENGTH=556	AT5G18070.1	AT5G18070.1		14	14	14	34.4	34.4	34.4	60.39	0	68.532	441720000	92	22.5888	22.6893	22.8892	22.8246	22.1685	21.7829	20.5355	21.8965
1.58252	-1.15257	AT1G11260.1 | Symbols: STP1, ATSTP1 | sugar transporter 1 | chr1:3777460-3780133 FORWARD LENGTH=522	AT1G11260.1	AT1G11260.1		10	10	10	17.2	17.2	17.2	57.61	0	199.26	1239100000	87	22.1034	20.7403	21.1596	22.3457	20.6432	20.2083	20.357	20.5302
1.01708	-1.1534	AT3G54900.1 | Symbols: CXIP1, ATGRXCP | CAX interacting protein 1 | chr3:20341850-20342371 REVERSE LENGTH=173	AT3G54900.1	AT3G54900.1		5	5	5	34.1	34.1	34.1	19.309	0	136.3	999630000	89	22.7128	21.01	21.1137	22.8925	20.8007	21.5981	20.4799	20.2367
3.00127	-1.15491	AT5G16730.1 | Symbols: | Plant protein of unknown function (DUF827) | chr5:5497890-5500775 FORWARD LENGTH=853	AT5G16730.1	AT5G16730.1		18	18	18	31.2	31.2	31.2	96.207	0	97.587	500710000	97	23.391	23.1754	22.6536	23.4501	21.8207	22.1288	22.0116	22.0895
1.98193	-1.15614	AT1G01960.1 | Symbols: EDA10 | SEC7-like guanine nucleotide exchange family protein | chr1:330830-337582 REVERSE LENGTH=1750	AT1G01960.1	AT1G01960.1		14	13	13	12.1	11.4	11.4	194.94	0	72.567	271760000	55	22.0224	21.1655	21.0086	22.2268	20.6369	20.5348	20.3245	20.3026
2.04675	-1.15679	AT1G78830.1 | Symbols: | Curculin-like (mannose-binding) lectin family protein | chr1:29637141-29638508 REVERSE LENGTH=455	AT1G78830.1;AT1G78820.1	AT1G78830.1		20	20	20	47.5	47.5	47.5	50.342	0	323.31	7556500000	341	25.7451	25.9173	26.3436	25.5924	24.8459	25.1964	24.0031	24.9257
1.90979	-1.17189	AT4G12390.1 | Symbols: PME1 | pectin methylesterase inhibitor 1 | chr4:7336553-7337173 FORWARD LENGTH=206	AT4G12390.1	AT4G12390.1		2	2	2	17	17	17	23.078	0	19.644	70359000	19	22.0643	22.0133	20.8679	20.9827	20.4197	20.437	20.281	20.103
1.45192	-1.17302	AT1G21630.1 | Symbols: | Calcium-binding EF hand family protein | chr1:7581457-7587796 FORWARD LENGTH=1218;AT1G21630.2 | Symbols: | Calcium-binding EF hand family protein | chr1:7581457-7587796 FORWARD LENGTH=1247	AT1G21630.1;AT1G21630.2	AT1G21630.1;AT1G21630.2		10	8	8	17.4	16.6	16.6	131.85	0	40.401	158630000	34	22.2274	20.7913	20.8236	22.2531	20.6709	20.3875	20.3046	20.0404
0.580208	-1.1735	AT2G47110.1 | Symbols: UBQ6 | ubiquitin 6 | chr2:19344701-19345174 FORWARD LENGTH=157;AT2G47110.2 | Symbols: UBQ6 | ubiquitin 6 | chr2:19344701-19345174 FORWARD LENGTH=157;AT1G23410.1 | Symbols: | Ribosomal protein S27a / Ubiquitin family protein | chr1:8	AT2G47110.1;AT2G47110.2;AT1G23410.1	AT2G47110.1;AT2G47110.2;AT1G23410.1		19	3	3	70.1	12.1	12.1	17.812	0	30.82	594640000	42	24.4558	24.1694	24.5513	25.0336	20.586	24.4551	24.3072	24.1677
2.53351	-1.17361	AT3G06650.1 | Symbols: ACLB-1 | ATP-citrate lyase B-1 | chr3:2079247-2082633 REVERSE LENGTH=608	AT3G06650.1	AT3G06650.1		29	29	8	61.3	61.3	18.9	65.813	0	323.31	5276500000	369	25.2858	25.2796	25.2446	25.4226	23.4276	24.4967	24.3337	24.28
0.616395	-1.18619	AT1G59830.1 | Symbols: PP2A-1 | protein phosphatase 2A-2 | chr1:22020708-22022293 REVERSE LENGTH=306;AT1G59830.2 | Symbols: PP2A-1 | protein phosphatase 2A-2 | chr1:22020929-22022293 REVERSE LENGTH=262	AT1G59830.1;AT1G59830.2	AT1G59830.1;AT1G59830.2		10	7	2	42.5	35	12.4	34.96	0	44.342	382710000	48	22.9425	23.4897	20.7537	20.7774	22.4936	20.3273	20.0426	20.3551
1.32165	-1.19146	AT5G47770.1 | Symbols: FPS1 | farnesyl diphosphate synthase 1 | chr5:19345297-19347415 FORWARD LENGTH=384	AT5G47770.1	AT5G47770.1		11	6	6	29.4	18.5	18.5	44.261	0	35.582	253170000	32	21.096	21.0689	21.1368	22.998	20.5519	20.4563	20.2659	20.2597
1.58021	-1.19709	AT5G43010.1 | Symbols: RPT4A | regulatory particle triple-A ATPase 4A | chr5:17248563-17251014 REVERSE LENGTH=399	AT5G43010.1	AT5G43010.1		31	4	4	78.9	10	10	44.816	0	23.625	181790000	35	20.8907	22.4092	21.0435	22.1012	20.5724	20.767	20.2058	20.111
5.37506	-1.19964	AT1G63770.3 | Symbols: | Peptidase M1 family protein | chr1:23657791-23664243 REVERSE LENGTH=987;AT1G63770.4 | Symbols: | Peptidase M1 family protein | chr1:23657791-23663476 REVERSE LENGTH=895;AT1G63770.5 | Symbols: | Peptidase M1 family protein | chr1	AT1G63770.3;AT1G63770.4;AT1G63770.5;AT1G63770.2;AT1G63770.1	AT1G63770.3;AT1G63770.4;AT1G63770.5;AT1G63770.2;AT1G63770.1		69	69	69	75.6	75.6	75.6	110.81	0	323.31	28464000000	1208	27.0875	27.2158	27.0444	27.1236	25.7889	25.8267	25.9805	26.0765
1.65569	-1.20054	AT4G37190.2 | Symbols: | LOCATED IN: cytosol, plasma membrane;EXPRESSED IN: 20 plant structures;EXPRESSED DURING: 13 growth stages;CONTAINS InterPro DOMAIN/s: Misato Segment II, myosin-like (InterPro:IPR019605), Tubulin/FtsZ, N-terminal (InterPro:IPR01	AT4G37190.2;AT4G37190.1	AT4G37190.2;AT4G37190.1		13	13	13	37.8	37.8	37.8	56.914	0	59.116	316910000	55	20.9482	22.2896	21.0211	22.3143	20.2481	20.6858	20.4695	20.3677
3.23713	-1.20118	AT3G62010.2 | Symbols: | unknown protein;LOCATED IN: cellular_component unknown;EXPRESSED IN: 23 plant structures;EXPRESSED DURING: 15 growth stages. | chr3:22964945-22971149 FORWARD LENGTH=1251;AT3G62010.1 | Symbols: | unknown protein;LOCATED IN: ce	AT3G62010.2;AT3G62010.1	AT3G62010.2;AT3G62010.1		14	14	14	15.2	15.2	15.2	141.17	0	32.544	184800000	53	21.7578	21.5944	21.7582	21.878	20.5393	20.7914	20.7922	20.0609
1.20672	-1.20482	AT2G35630.1 | Symbols: MOR1, GEM1 | ARM repeat superfamily protein | chr2:14966828-14980361 FORWARD LENGTH=1978	AT2G35630.1;AT3G28155.1	AT2G35630.1		21	21	21	18	18	18	217.55	0	59.738	270250000	49	20.5987	20.4291	22.1326	22.4194	20.3575	20.3933	20.1263	19.8835
0.801384	-1.20977	AT5G54310.1 | Symbols: NEV, AGD5 | ARF-GAP domain 5 | chr5:22057262-22061066 REVERSE LENGTH=483	AT5G54310.1	AT5G54310.1		8	8	8	26.1	26.1	26.1	52.592	0	37.795	659630000	69	23.8559	20.8035	20.8238	21.0992	20.575	20.6778	20.3788	20.1117
1.63252	-1.21843	AT3G66654.3 | Symbols: | Cyclophilin-like peptidyl-prolyl cis-trans isomerase family protein | chr3:2088694-2090297 FORWARD LENGTH=236;AT3G66654.2 | Symbols: | Cyclophilin-like peptidyl-prolyl cis-trans isomerase family protein | chr3:2088694-2090297 FOR	AT3G66654.3;AT3G66654.2;AT3G66654.1	AT3G66654.3;AT3G66654.2;AT3G66654.1		16	16	16	69.5	69.5	69.5	26.427	0	142.9	2868000000	93	20.8613	20.8539	22.2267	22.0271	20.7194	20.2901	20.1235	19.9622
0.983204	-1.21847	AT4G02720.1 | Symbols: | unknown protein;FUNCTIONS IN: molecular_function unknown;INVOLVED IN: biological_process unknown;EXPRESSED IN: 25 plant structures;EXPRESSED DURING: 14 growth stages;CONTAINS InterPro DOMAIN/s: Protein of unknown function DUF	AT4G02720.1	AT4G02720.1		4	4	4	19.4	19.4	19.4	48.462	0	29.95	77187000	15	20.6559	21.0961	20.9418	23.3454	20.4677	20.6012	20.1458	19.9507
1.51859	-1.21982	AT5G43900.1 | Symbols: MYA2, ATMYA2, XI-2, XI-6 | myosin 2 | chr5:17657241-17666653 REVERSE LENGTH=1505;AT5G43900.3 | Symbols: MYA2 | myosin 2 | chr5:17657241-17667413 REVERSE LENGTH=1565;AT5G43900.2 | Symbols: MYA2 | myosin 2 | chr5:17657241-17667413 REVE	AT5G43900.1;AT5G43900.3;AT5G43900.2	AT5G43900.1;AT5G43900.3;AT5G43900.2		10	10	6	9.6	9.6	5.2	169.93	0	29.172	269420000	56	22.2431	22.3113	21.0642	20.661	20.4706	20.5576	20.3395	20.0327
1.29441	-1.24187	AT5G21326.1 | Symbols: | Ca2+regulated serine-threonine protein kinase family protein | chr5:7218081-7221743 FORWARD LENGTH=439	AT5G21326.1;AT1G30270.1	AT5G21326.1		9	9	9	24.1	24.1	24.1	49.628	0	65.4	404760000	55	22.4145	22.5963	20.9788	20.6714	20.7762	20.3104	20.4856	20.1213
2.12655	-1.24417	AT2G16430.2 | Symbols: PAP10, ATPAP10 | purple acid phosphatase 10 | chr2:7120502-7122772 REVERSE LENGTH=468;AT2G16430.1 | Symbols: PAP10, ATPAP10 | purple acid phosphatase 10 | chr2:7120502-7122020 REVERSE LENGTH=348	AT2G16430.2;AT2G16430.1	AT2G16430.2;AT2G16430.1		16	16	16	49.4	49.4	49.4	54.218	0	323.31	3855000000	175	26.6553	25.8841	26.6565	25.9722	24.4112	25.4653	25.0012	25.3136
1.04331	-1.24615	AT3G08510.3 | Symbols: | phospholipase C 2 | chr3:2582626-2585556 REVERSE LENGTH=552;AT3G08510.2 | Symbols: ATPLC2, PLC2 | phospholipase C 2 | chr3:2582626-2585556 REVERSE LENGTH=581;AT3G08510.1 | Symbols: ATPLC2, PLC2 | phospholipase C 2 | chr3:2582626-2	AT3G08510.3;AT3G08510.2;AT3G08510.1;AT3G55940.1	AT3G08510.3;AT3G08510.2;AT3G08510.1		23	23	23	54.5	54.5	54.5	62.477	0	313.83	1649600000	120	20.72	21.1771	20.9006	23.2782	20.606	20.1149	20.5056	19.865
0.753082	-1.24693	AT3G45960.1 | Symbols: ATEXLA3, EXPL3, ATEXPL3, ATHEXP BETA 2.3, EXLA3 | expansin-like A3 | chr3:16893058-16893789 FORWARD LENGTH=215;AT3G45960.2 | Symbols: ATEXLA3, EXPL3, ATEXPL3, ATHEXP BETA 2.3, EXLA3 | expansin-like A3 | chr3:16892826-16893789 FORWARD	AT3G45960.1;AT3G45960.2	AT3G45960.1;AT3G45960.2		11	10	10	50.7	45.1	45.1	23.392	0	184.38	5351700000	182	26.0114	25.4409	26.4345	25.749	22.6956	26.3354	24.2104	25.4066
2.09673	-1.24822	AT1G10290.1 | Symbols: ADL6, DRP2A | dynamin-like protein 6 | chr1:3370774-3377120 FORWARD LENGTH=914	AT1G10290.1	AT1G10290.1		43	18	18	52.8	30.9	30.9	99.165	0	88.56	543610000	89	21.1263	22.2752	21.8724	20.9445	20.4762	20.2965	20.1463	20.3065
1.53468	-1.24878	AT2G47390.1 | Symbols: | Prolyl oligopeptidase family protein | chr2:19442278-19446253 REVERSE LENGTH=961	AT2G47390.1	AT2G47390.1		12	12	12	21.9	21.9	21.9	106.26	0	68.714	359990000	73	20.8465	22.4736	21.1907	22.2915	20.7035	20.5792	20.5917	19.9329
1.04687	-1.25012	AT5G48810.1 | Symbols: ATB5-B, B5 #3, ATCB5-D, CB5-D | cytochrome B5 isoform D | chr5:19789249-19790180 REVERSE LENGTH=140	AT5G48810.1	AT5G48810.1		9	9	9	69.3	69.3	69.3	15.097	0	69.514	1096100000	66	20.8146	20.4537	21.0368	23.1289	20.3894	20.266	20.0285	19.7495
0.909008	-1.25721	AT1G35140.1 | Symbols: PHI-1, EXL7 | Phosphate-responsive 1 family protein | chr1:12852089-12853018 FORWARD LENGTH=309	AT1G35140.1	AT1G35140.1		10	10	10	39.8	39.8	39.8	33.185	0	222.08	1605200000	176	23.9361	24.1066	24.4626	24.2978	20.9269	24.0746	23.3109	23.4618
1.18405	-1.2598	AT4G32640.2 | Symbols: | Sec23/Sec24 protein transport family protein | chr4:15742661-15750424 FORWARD LENGTH=1080;AT4G32640.1 | Symbols: | Sec23/Sec24 protein transport family protein | chr4:15742661-15750424 FORWARD LENGTH=1080	AT4G32640.2;AT4G32640.1	AT4G32640.2;AT4G32640.1		14	11	11	19.3	14.7	14.7	116.29	0	57.445	378740000	46	21.2081	23.2532	21.1506	20.8615	20.4839	20.5559	20.3051	20.0892
3.17257	-1.2609	AT5G19440.1 | Symbols: | NAD(P)-binding Rossmann-fold superfamily protein | chr5:6556493-6558123 FORWARD LENGTH=326	AT5G19440.1	AT5G19440.1		29	29	29	64.7	64.7	64.7	35.593	0	323.31	16022000000	584	26.9516	27.13	26.885	26.7552	25.7614	25.7717	25.1533	25.9918
0.738788	-1.261	AT3G07770.1 | Symbols: Hsp89.1, AtHsp90.6, AtHsp90-6 | HEAT SHOCK PROTEIN 89.1 | chr3:2479611-2483970 FORWARD LENGTH=799	AT3G07770.1	AT3G07770.1		58	52	52	73.6	68	68	90.566	0	323.31	25365000000	753	20.5693	20.8429	19.9915	20.191	20.598	19.2301	19.8809	16.8418
1.97999	-1.2634	AT5G63840.1 | Symbols: RSW3, PSL5 | Glycosyl hydrolases family 31 protein | chr5:25545056-25548922 FORWARD LENGTH=921	AT5G63840.1	AT5G63840.1		36	36	36	46.9	46.9	46.9	104.27	0	323.31	3261500000	314	23.8633	23.9585	24.0417	23.8937	21.6918	22.8623	22.8711	23.2785
1.39932	-1.28669	AT1G15910.1 | Symbols: | XH/XS domain-containing protein | chr1:5465951-5468723 FORWARD LENGTH=634	AT1G15910.1	AT1G15910.1		9	9	9	20.8	20.8	20.8	72.634	0	59.318	113440000	29	20.7031	22.6182	22.3005	20.9802	20.5231	20.5963	20.3165	20.0193
1.8151	-1.28731	AT2G28520.1 | Symbols: VHA-A1 | vacuolar proton ATPase A1 | chr2:12210026-12215532 FORWARD LENGTH=817	AT2G28520.1	AT2G28520.1		12	12	12	22.6	22.6	22.6	93.414	0	143.17	419360000	59	21.4946	20.6092	22.357	21.6903	20.424	20.4186	20.2925	19.8669
0.473274	-1.29722	AT4G03080.1 | Symbols: BSL1 | BRI1 suppressor 1 (BSU1)-like 1 | chr4:1359935-1365166 REVERSE LENGTH=881	AT4G03080.1	AT4G03080.1		18	18	16	36.4	36.4	33.5	96.145	0	96.632	1133400000	70	25.3979	25.6195	25.6895	25.6646	20.5818	25.6606	25.3579	25.5823
2.33787	-1.30749	AT3G17840.1 | Symbols: RLK902 | receptor-like kinase 902 | chr3:6106092-6108430 FORWARD LENGTH=647	AT3G17840.1	AT3G17840.1		19	19	18	34.8	34.8	33.4	70.405	0	187.82	910620000	120	21.2252	22.4061	21.0979	21.5078	20.2533	20.1451	20.2838	20.3248
0.599918	-1.31599	AT5G44720.1 | Symbols: | Molybdenum cofactor sulfurase family protein | chr5:18043086-18045275 FORWARD LENGTH=308;AT5G44720.2 | Symbols: | Molybdenum cofactor sulfurase family protein | chr5:18043086-18044862 FORWARD LENGTH=230	AT5G44720.1;AT5G44720.2	AT5G44720.1;AT5G44720.2		7	7	7	37	37	37	34.798	0	100.16	295190000	32	23.7161	23.6726	21.2378	21.0795	20.4625	20.5394	23.2949	20.1453
1.24292	-1.32031	AT3G28950.1 | Symbols: | AIG2-like (avirulence induced gene) family protein | chr3:10976359-10977370 REVERSE LENGTH=165	AT3G28950.1	AT3G28950.1		9	9	9	71.5	71.5	71.5	18.619	0	67.608	373560000	48	21.0489	20.9233	21.2198	23.2698	20.5358	20.2122	20.1133	20.3193
1.90211	-1.32073	AT3G62120.2 | Symbols: | Class II aaRS and biotin synthetases superfamily protein | chr3:23001227-23003849 REVERSE LENGTH=530;AT3G62120.1 | Symbols: | Class II aaRS and biotin synthetases superfamily protein | chr3:23001227-23003849 REVERSE LENGTH=530	AT3G62120.2;AT3G62120.1	AT3G62120.2;AT3G62120.1		51	51	51	72.6	72.6	72.6	60.755	0	323.31	10499000000	639	25.729	26.0732	25.9521	26.0054	23.8225	24.1755	25.3455	25.1332
1.75019	-1.32451	AT4G39520.1 | Symbols: | GTP-binding protein-related | chr4:18371329-18374000 REVERSE LENGTH=369	AT4G39520.1	AT4G39520.1		14	14	14	43.9	43.9	43.9	41.143	0	80.612	445460000	68	21.8126	21.0563	21.0207	22.6672	20.2818	20.2958	20.6555	20.0258
1.48217	-1.33501	AT3G53520.2 | Symbols: UXS1, ATUXS1 | UDP-glucuronic acid decarboxylase 1 | chr3:19841635-19844057 FORWARD LENGTH=433;AT3G53520.1 | Symbols: UXS1, ATUXS1 | UDP-glucuronic acid decarboxylase 1 | chr3:19841635-19844057 FORWARD LENGTH=435;AT3G53520.4 | Symbol	AT3G53520.2;AT3G53520.1;AT3G53520.4;AT3G53520.3	AT3G53520.2;AT3G53520.1;AT3G53520.4;AT3G53520.3		17	15	15	44.1	42.3	42.3	48.402	0	258.38	1416400000	101	22.4797	20.9665	21.0013	22.7061	20.4827	20.3171	20.8	20.2138
1.87747	-1.33798	AT4G22710.1 | Symbols: CYP706A2 | cytochrome P450, family 706, subfamily A, polypeptide 2 | chr4:11935038-11936618 FORWARD LENGTH=526;AT4G22690.1 | Symbols: CYP706A1 | cytochrome P450, family 706, subfamily A, polypeptide 1 | chr4:11929847-11931520 FORWARD	AT4G22710.1;AT4G22690.1;AT4G12300.1	AT4G22710.1;AT4G22690.1		31	31	31	61	61	61	59.425	0	323.31	1936800000	181	22.6787	21.9471	21.164	21.0186	20.3069	20.4474	20.3636	20.3386
2.11961	-1.34548	AT5G14060.2 | Symbols: CARAB-AK-LYS | Aspartate kinase family protein | chr5:4536143-4538993 FORWARD LENGTH=544;AT5G14060.1 | Symbols: CARAB-AK-LYS | Aspartate kinase family protein | chr5:4536143-4538993 FORWARD LENGTH=544	AT5G14060.2;AT5G14060.1	AT5G14060.2;AT5G14060.1		11	9	8	29	24.8	22.2	59.604	0	191.5	923850000	98	21.2051	21.9177	21.0795	22.4538	20.5689	20.4432	20.1942	20.0679
1.64192	-1.34943	AT2G14740.2 | Symbols: ATVSR3, VSR3, VSR2;2, BP80-2;2 | vaculolar sorting receptor 3 | chr2:6308895-6312303 FORWARD LENGTH=628;AT2G14740.1 | Symbols: ATVSR3, VSR3, VSR2;2, BP80-2;2 | vaculolar sorting receptor 3 | chr2:6308895-6312303 FORWARD LENGTH=628	AT2G14740.2;AT2G14740.1	AT2G14740.2;AT2G14740.1		29	7	6	64	20.7	18.5	69.743	0	31.737	259340000	36	20.7939	22.589	21.1804	22.3762	20.4448	20.3409	20.4908	20.2651
1.94773	-1.35089	AT1G59600.1 | Symbols: ZCW7 | ZCW7 | chr1:21889927-21891910 REVERSE LENGTH=324	AT1G59600.1	AT1G59600.1		7	7	7	35.8	35.8	35.8	37.573	0	50.478	482080000	82	23.1277	22.92	23.0546	23.1086	20.6188	22.2943	21.8664	22.0277
1.56457	-1.35989	AT2G31810.1 | Symbols: | ACT domain-containing small subunit of acetolactate synthase protein | chr2:13524271-13528246 FORWARD LENGTH=491;AT2G31810.2 | Symbols: | ACT domain-containing small subunit of acetolactate synthase protein | chr2:13524419-135282	AT2G31810.1;AT2G31810.2;AT2G31810.3	AT2G31810.1;AT2G31810.2;AT2G31810.3		27	27	27	62.9	62.9	62.9	53.872	0	323.31	3163800000	244	21.5638	22.0334	20.3564	22.359	20.6085	20.1609	20.2902	19.8135
0.913076	-1.3619	AT3G10410.1 | Symbols: SCPL49, CPY | SERINE CARBOXYPEPTIDASE-LIKE 49 | chr3:3235518-3238063 REVERSE LENGTH=516	AT3G10410.1	AT3G10410.1		8	8	8	28.9	28.9	28.9	57.301	0	52.25	194410000	18	20.7566	23.8194	21.2239	20.9088	20.9055	20.2639	19.7717	20.3201
1.10478	-1.3629	AT3G46460.1 | Symbols: UBC13 | ubiquitin-conjugating enzyme 13 | chr3:17096120-17097315 REVERSE LENGTH=166	AT3G46460.1	AT3G46460.1		3	3	2	28.9	28.9	15.7	18.822	0	19.817	233290000	25	21.1249	23.6165	21.2568	20.8937	20.4925	20.4274	20.0584	20.462
1.3473	-1.36419	AT2G17290.1 | Symbols: CPK6, ATCDPK3, ATCPK6 | Calcium-dependent protein kinase family protein | chr2:7517005-7519239 FORWARD LENGTH=544	AT2G17290.1;AT4G38230.3;AT4G38230.2;AT4G38230.1	AT2G17290.1		10	10	4	29.6	29.6	16	61.111	0	39.313	427120000	63	22.8156	22.6876	21.1959	20.7162	20.6365	20.5652	20.6042	20.1527
1.79434	-1.36581	AT1G21380.1 | Symbols: | Target of Myb protein 1 | chr1:7485806-7488032 REVERSE LENGTH=506	AT1G21380.1;AT1G76970.1	AT1G21380.1		5	5	5	23.7	23.7	23.7	55.791	0	37.515	179840000	38	22.3057	22.3931	21.0328	20.9187	20.4373	20.4862	20.0161	20.2475
1.63101	-1.36696	AT4G38220.1 | Symbols: | Peptidase M20/M25/M40 family protein | chr4:17925251-17926919 FORWARD LENGTH=430;AT4G38220.2 | Symbols: | Peptidase M20/M25/M40 family protein | chr4:17925251-17926919 FORWARD LENGTH=433	AT4G38220.1;AT4G38220.2	AT4G38220.1;AT4G38220.2		23	23	23	62.1	62.1	62.1	47.739	0	283	2818000000	219	21.2145	21.8173	21.5449	20.5856	20.1882	20.443	20.2268	18.8366
1.0375	-1.37806	AT1G73250.1 | Symbols: ATFX, GER1 | GDP-4-keto-6-deoxymannose-3,5-epimerase-4-reductase 1 | chr1:27545213-27546360 REVERSE LENGTH=323	AT1G73250.1	AT1G73250.1		10	10	8	60.4	60.4	54.8	35.569	0	54.138	458960000	74	22.6827	22.9707	22.8653	23.1909	22.9715	22.4334	20.5802	20.2123
0.537437	-1.37978	AT5G02530.2 | Symbols: | RNA-binding (RRM/RBD/RNP motifs) family protein | chr5:564332-565776 REVERSE LENGTH=290;AT5G02530.1 | Symbols: | RNA-binding (RRM/RBD/RNP motifs) family protein | chr5:564332-565776 REVERSE LENGTH=292	AT5G02530.2;AT5G02530.1	AT5G02530.2;AT5G02530.1		4	4	4	20	20	20	30.566	0	98.895	1103100000	43	20.7698	20.7393	20.9298	25.4956	20.8629	21.0273	20.3887	20.1365
2.10495	-1.38674	AT5G47880.2 | Symbols: ERF1-1 | eukaryotic release factor 1-1 | chr5:19386555-19387865 REVERSE LENGTH=436;AT5G47880.1 | Symbols: ERF1-1 | eukaryotic release factor 1-1 | chr5:19386555-19387865 REVERSE LENGTH=436	AT5G47880.2;AT5G47880.1	AT5G47880.2;AT5G47880.1		8	7	7	24.3	20	20	48.722	0	28.66	269310000	53	22.237	22.2182	20.8679	22.0634	20.6536	20.5938	20.0707	20.5213
3.14374	-1.39531	AT1G18500.1 | Symbols: MAML-4, IPMS1 | methylthioalkylmalate synthase-like 4 | chr1:6369347-6372861 FORWARD LENGTH=631	AT1G18500.1	AT1G18500.1		28	28	13	60.7	60.7	31.2	68.675	0	323.31	4403800000	266	21.4703	21.8781	21.3717	22.3095	20.4981	20.3056	20.3719	20.2726
1.40257	-1.40049	AT1G77540.1 | Symbols: | Acyl-CoA N-acyltransferases (NAT) superfamily protein | chr1:29137762-29138182 REVERSE LENGTH=114	AT1G77540.1	AT1G77540.1		5	5	5	50	50	50	12.855	0	13.971	429770000	57	22.5796	20.7308	21.1769	22.7881	20.7758	20.4402	20.4677	19.9899
1.9282	-1.40634	AT4G19003.2 | Symbols: VPS25 | E2F/DP family winged-helix DNA-binding domain | chr4:10407571-10408582 REVERSE LENGTH=179;AT4G19003.1 | Symbols: VPS25 | E2F/DP family winged-helix DNA-binding domain | chr4:10407571-10408582 REVERSE LENGTH=179	AT4G19003.2;AT4G19003.1	AT4G19003.2;AT4G19003.1		7	7	7	47.5	47.5	47.5	20.682	0	21.858	129380000	31	22.365	22.5358	21.0836	21.138	20.5089	20.4651	20.2815	20.2415
1.72699	-1.41668	AT1G22410.1 | Symbols: | Class-II DAHP synthetase family protein | chr1:7912120-7914742 FORWARD LENGTH=527	AT1G22410.1	AT1G22410.1		19	16	15	49.3	45.2	42.9	58.326	0	303.73	2256600000	158	20.7893	22.1481	21.2053	22.6951	20.2213	20.4982	20.3674	20.0842
[truncated: 906 more rows]

## Sheet: C - HS vs HS_La
FDR 0.05 - Cytosolic -HS vs HS_LaCl3
																	LFQ intensities
[truncated: 11 more rows]

## Sheet: C - La vs HS_La
FDR 0.05 - Cytosolic - LaCl3 vs HS_LaCl3
[truncated: 2,297 more rows]

[truncated: 4 more sheets: M - Crt vs La, M - Crt vs HS, M - HS vs HS_La, M - La vs HS_La]
