# Supplementary material for: The boundary of life and death: changes in mitochondrial and cytosolic proteomes associated with programmed cell death of Arabidopsis thaliana suspension culture cells
Source: Front Plant Sci. 2023 Aug 1;14:1194866. doi: 10.3389/fpls.2023.1194866 (PMC10431908; doi:10.3389/fpls.2023.1194866)
Supplement: Supplementary file 5 [file Table_4.xlsx]

## Sheet: Table 4A
Supplemental Table S4A: Proteins upregulated in cytosolic and downregulated in the mitochondrial fraction following the heat shock. (fold change cut-off 1.5, FDR cut-off 0.05).
Consensus localization extracted from SUBA4 is included.
Mitochondrial proteins that were downregulated more than IDH2 mitochondrial matrix marker protein are are highlighted in yellow ( 113 proteins).						Summary
Proteins that were not downregulated in mitochondrial fraction when HS was performed in presence of LaCl3 are highlighted in green (18 proteins).						Location	Count
						Cytosol	18
Protein Properties		Location Consensus	Location Experiments			Golgi	1									AT5G61030
Gene	Description	Location SUBAcon	Location GFP	Location Mass Spec		Mitochondrion	125									AT5G13450
AT1G06130	glyoxalase 2-4;	mitochondrion		mitochondrion:23444301;mitochondrion:27943495;mitochondrion:23444301;plastid:20423899;plastid:18431481;plastid:24361574		Nucleus	4									AT5G08690
AT1G14980	chaperonin 10;Encodes mitochondrial-localized chaperonin 10 that complements the E.coli groES mutant. Its mRNA is upregulated in response to heat shock treatment and is expressed uniformly in various organs.	mitochondrion		mitochondrion:12492832;mitochondrion:14671022;mitochondrion:18385124;mitochondrion:21472856;mitochondrion:21841088;mitochondrion:22923678;mitochondrion:24727099;mitochondrion:27122571;mitochondrion:27943495;mitochondrion:21896887;plastid:24361574		Peroxisome	27									AT1G65290
AT1G17290	alanine aminotransferas;Encodes for alanine aminotransferase (ALAAT1), involved in alanine catabolism during plants recovery from hypoxia	mitochondrion	cytosol:12631323	extracellular:26572690;mitochondrion:11743115;mitochondrion:14671022;mitochondrion:17137349;mitochondrion:18385124;mitochondrion:21296373;mitochondrion:21472856;mitochondrion:21841088;mitochondrion:27122571;mitochondrion:27943495;plasma membrane:25641898;plasma membrane:15574830;plasma membrane:21433285;plasma membrane:22215637;plasma membrane:26781341;plastid:15028209;plastid:24361574;vacuole:23…		Plastid	107									AT3G57050
AT1G22450	cytochrome C oxidase 6B;subunit 6b of cytochrome c oxidase	mitochondrion		extracellular:26572690;mitochondrion:21472856;mitochondrion:22923678;mitochondrion:24727099;mitochondrion:27122571;mitochondrion:27943495;mitochondrion:21896887;plastid:14729914;plastid:15028209		Multiple	6									AT3G01280
AT1G22840	CYTOCHROME C-1;Encodes cytochrome c. Contains two site II (TGGGCC/T) elements, which interact with a TCP-domain transcription factor, and a downstream internal telomeric repeat, and are required for expression of the Cytc-1 gene. Promoter directs preferential expression in root and shoot meristems and in anthers.	mitochondrion		cytosol:21166475;extracellular:26572690;mitochondrion:12970493;mitochondrion:14671022;mitochondrion:21472856;mitochondrion:21841088;mitochondrion:22923678;mitochondrion:24727099;mitochondrion:27122571;mitochondrion:27943495;mitochondrion:21896887;vacuole:17151019		Total	288									AT1G47260
AT1G23100	GroES-like family protein;	mitochondrion		mitochondrion:14671022;mitochondrion:21841088;mitochondrion:22923678;mitochondrion:27943495												AT1G77670
AT1G32470	Single hybrid motif superfamily protein;	mitochondrion		mitochondrion:14671022;mitochondrion:18385124;mitochondrion:21296373;mitochondrion:21472856;mitochondrion:24727099;mitochondrion:27943495;plastid:15028209;plastid:24361574												AT4G22310
AT1G47260	gamma carbonic anhydrase 2;Encodes mitochondrial gamma carbonic anhydrase. Component of the NADH dehydrogenase complex.	mitochondrion		golgi:25900983;golgi:25900983;golgi:25900983;golgi:25900983;golgi:25900983;mitochondrion:11743115;mitochondrion:12837548;mitochondrion:14671022;mitochondrion:15276431;mitochondrion:17406791;mitochondrion:18189341;mitochondrion:20197505;mitochondrion:21296373;mitochondrion:21472856;mitochondrion:21841088;mitochondrion:22923678;mitochondrion:23444301;mitochondrion:23761796;mitochondrion:24727099;mi…												AT5G14590
AT1G47420	succinate dehydrogenase 5;	mitochondrion		mitochondrion:11743114;mitochondrion:11743115;mitochondrion:12970493;mitochondrion:14671022;mitochondrion:15276431;mitochondrion:15604729;mitochondrion:19688752;mitochondrion:21472856;mitochondrion:21841088;mitochondrion:22923678;mitochondrion:23444301;mitochondrion:27122571;mitochondrion:27943495;mitochondrion:21896887;mitochondrion:23444301;nucleus:14617066;plasma membrane:19334764												AT2G29630
AT1G48030	mitochondrial lipoamide dehydrogenase 1;Encodes a mitochondrial lipoamide dehydrogenase whose expression is induced by light.	mitochondrion		extracellular:26572690;mitochondrion:11743114;mitochondrion:11743115;mitochondrion:14671022;mitochondrion:17137349;mitochondrion:18385124;mitochondrion:20197505;mitochondrion:21296373;mitochondrion:21472856;mitochondrion:21841088;mitochondrion:22923678;mitochondrion:23444301;mitochondrion:24727099;mitochondrion:27122571;mitochondrion:27943495;mitochondrion:23444301;nucleus:27177187;plasma membran…												AT3G52300
AT1G50940	electron transfer flavoprotein alpha;Encodes the electron transfer flavoprotein ETF alpha, a putative subunit of the mitochondrial electron transfer flavoprotein complex (ETF beta is At5g43430.1) in Arabidopsis. Mutations of the ETF beta gene results in accelerated senescence and early death compared to wild-type during extended darkness.	mitochondrion		mitochondrion:14671022;mitochondrion:14764908;mitochondrion:21472856;mitochondrion:27943495;plastid:21531424												AT2G07698
AT1G51980	Insulinase (Peptidase family M16) protein;	mitochondrion		golgi:25900983;golgi:25900983;golgi:25900983;golgi:25900983;golgi:25900983;mitochondrion:11743115;mitochondrion:11870776;mitochondrion:14671022;mitochondrion:14730085;mitochondrion:15276431;mitochondrion:17137349;mitochondrion:18189341;mitochondrion:21472856;mitochondrion:21841088;mitochondrion:22923678;mitochondrion:23444301;mitochondrion:24727099;mitochondrion:27122571;mitochondrion:27943495;mi…												AT2G03680
AT1G53240	Lactate/malate dehydrogenase family protein;	mitochondrion		extracellular:26572690;golgi:25900983;golgi:25900983;golgi:25900983;golgi:25900983;mitochondrion:11743114;mitochondrion:11743115;mitochondrion:12492832;mitochondrion:14671022;mitochondrion:15276431;mitochondrion:18385124;mitochondrion:21472856;mitochondrion:21841088;mitochondrion:22923678;mitochondrion:23444301;mitochondrion:24727099;mitochondrion:27943495;mitochondrion:21896887;mitochondrion:234…												AT4G00860
AT1G53580	glyoxalase II 3;Mononuclear Fe(II)-containing member of the b-lactamase fold superfamily. ETHE1 is homodimeric in solution, exhibits low-level esterase activity, and specifically binds a single Fe(II) atom in the active site.	mitochondrion		mitochondrion:27943495												AT4G10750
AT1G54220	Dihydrolipoamide acetyltransferase, long form protein;	mitochondrion		mitochondrion:14671022;mitochondrion:14764908;mitochondrion:18385124;mitochondrion:21472856;mitochondrion:21841088;mitochondrion:23444301;mitochondrion:24727099;mitochondrion:27122571;mitochondrion:27943495;mitochondrion:23444301;vacuole:15215502												AT2G40490
AT1G59900	pyruvate dehydrogenase complex E1 alpha subunit;encodes the e1 alpha subunit of the pyruvate dehydrogenase complex (PDC)	mitochondrion		extracellular:26572690;mitochondrion:11743115;mitochondrion:14671022;mitochondrion:18385124;mitochondrion:19688752;mitochondrion:21296373;mitochondrion:21472856;mitochondrion:21841088;mitochondrion:24727099;mitochondrion:27943495;plastid:24361574												AT4G17040
AT1G61570	translocase of the inner mitochondrial membrane 13;Encodes a putative small zinc finger-like protein (TIM13); nucleus-encoded gene whose product is found in the mitochondrial inner membrane space.	mitochondrion		extracellular:26572690;mitochondrion:14671022;mitochondrion:14730085;mitochondrion:21472856;mitochondrion:22923678;mitochondrion:27943495;mitochondrion:21896887												AT5G63570
AT1G65290	mitochondrial acyl carrier protein 2;Encodes a member of the mitochondrial acyl carrier protein (ACP) family. As part of the mitochondrial matrix, it is likely to be involved in fatty acid or lipoic acid biogenesis.	mitochondrion		mitochondrion:12606038;mitochondrion:14671022;mitochondrion:17406791;mitochondrion:21472856;mitochondrion:24727099;mitochondrion:27122571;mitochondrion:27943495												AT5G67500
AT1G72330	alanine aminotransferase 2;Encodes for alanine aminotransferase ALAAT2.	mitochondrion		mitochondrion:17137349;mitochondrion:21472856;mitochondrion:21841088;mitochondrion:27943495												AT5G57490
AT1G77670	Pyridoxal phosphate (PLP)-dependent transferases superfamily protein;	mitochondrion		mitochondrion:27943495;plastid:20061580												AT5G66760
AT1G79440	aldehyde dehydrogenase 5F1;Encodes a mitochondrial succinic semialdehyde dehydrogenase (SSADH). Nomenclature according to Kirch, et al (2004).	mitochondrion		extracellular:26572690;mitochondrion:11743115;mitochondrion:14671022;mitochondrion:21472856;mitochondrion:21841088;mitochondrion:27943495;plastid:18431481;plastid:20061580;plastid:24361574												AT5G09590
AT1G80230	Rubredoxin-like superfamily protein;	mitochondrion		mitochondrion:11743115;mitochondrion:14671022;mitochondrion:14764908;mitochondrion:15604729;mitochondrion:18385124;mitochondrion:21472856;mitochondrion:22923678;mitochondrion:23444301;mitochondrion:27122571;mitochondrion:27943495;mitochondrion:23444301												AT4G27585
AT2G05710	aconitase 3;Encodes an aconitase that can catalyze the conversion of citrate to isocitrate through a cis-aconitate intermediate, indicating that it may participate in the TCA cycle and other primary metabolic pathways. The protein is believed to accumulate in the mitochondria and the cytosol. It affects CSD2 (At2g28190 - a superoxide dismutase) transcript levels and may play a role in the respons…	mitochondrion	mitochondrion:in house;plastid:in house	extracellular:26572690;golgi:25900983;golgi:25900983;mitochondrion:11743114;mitochondrion:11743115;mitochondrion:12492832;mitochondrion:14671022;mitochondrion:17137349;mitochondrion:18385124;mitochondrion:21296373;mitochondrion:21472856;mitochondrion:21841088;mitochondrion:24727099;mitochondrion:27122571;mitochondrion:27943495;plasma membrane:19334764;plasma membrane:21433285;plastid:15028209;pla…												AT1G51980
AT2G13560	NAD-dependent malic enzyme 1;Encodes an NAD-dependent malic enzyme (NAD-ME) that does not act on oxaloacetate, indicating that it belongs to EC 1.1.1.39. It is a member of the alpha family of NAD-MEs in plants. It appears to function as a homodimer or as a heterodimer with the beta-type NAD-ME2 (At4g00570). NAD-ME1 transcript and protein levels are higher during the night than during the day.	mitochondrion		mitochondrion:14671022;mitochondrion:17137349;mitochondrion:21472856;mitochondrion:21841088;mitochondrion:23444301;mitochondrion:24727099;mitochondrion:27943495;plastid:15028209												AT3G02870
AT2G14170	aldehyde dehydrogenase 6B2;Arabidopsis thaliana methylmalonate-semialdehyde dehydrogenase	mitochondrion		extracellular:26572690;mitochondrion:11743115;mitochondrion:12492832;mitochondrion:14671022;mitochondrion:14764908;mitochondrion:21472856;mitochondrion:21841088;mitochondrion:27122571;mitochondrion:27943495												AT4G02930
AT2G21640	;Encodes a protein of unknown function that is a marker for oxidative stress response.	mitochondrion	mitochondrion:19995732;unclear:21443605	mitochondrion:12492832;mitochondrion:14671022;mitochondrion:21296373;mitochondrion:21472856;mitochondrion:27943495												AT4G21105
AT2G26080	glycine decarboxylase P-protein 2;	mitochondrion		mitochondrion:14671022;mitochondrion:17137349;mitochondrion:18385124;mitochondrion:21296373;mitochondrion:21472856;mitochondrion:21841088;mitochondrion:24727099;mitochondrion:27122571;mitochondrion:27943495;plasma membrane:21433285;plastid:12938931;plastid:15028209;plastid:24361574												AT2G33040
AT2G29530	Tim10/DDP family zinc finger protein;Encodes a small zinc finger-like protein that is a component of the mitochondrial protein import apparatus.	mitochondrion		mitochondrion:14730085;mitochondrion:21841088;mitochondrion:22923678;mitochondrion:27122571;mitochondrion:27943495												AT5G52840
AT2G30970	aspartate aminotransferase 1;ASPARTATE AMINOTRANSFERASE 1	mitochondrion	cytosol:24130194	mitochondrion:11743115;mitochondrion:14671022;mitochondrion:18385124;mitochondrion:21296373;mitochondrion:21472856;mitochondrion:21841088;mitochondrion:22923678;mitochondrion:24727099;mitochondrion:27943495;mitochondrion:21896887;plasma membrane:19334764;plastid:24361574;vacuole:15215502												AT5G50850
AT2G33040	gamma subunit of Mt ATP synthase;	mitochondrion	mitochondrion:23250447;unclear:15610358	extracellular:26572690;golgi:25900983;golgi:25900983;golgi:25900983;golgi:25900983;golgi:25900983;mitochondrion:12681508;mitochondrion:14671022;mitochondrion:15276431;mitochondrion:18189341;mitochondrion:21472856;mitochondrion:21841088;mitochondrion:22923678;mitochondrion:23444301;mitochondrion:27943495;mitochondrion:21896887;nucleus:15496452;plasma membrane:19334764;plasma membrane:20843791;plas…												AT3G15640
AT2G33210	heat shock protein 60-2;	mitochondrion	mitochondrion:in house	extracellular:26572690;golgi:25900983;golgi:25900983;mitochondrion:11743115;mitochondrion:14671022;mitochondrion:15276431;mitochondrion:17137349;mitochondrion:21296373;mitochondrion:21472856;mitochondrion:21841088;mitochondrion:22923678;mitochondrion:27122571;mitochondrion:27943495;plasma membrane:17317660;plasma membrane:19334764;plasma membrane:21433285;plastid:15028209;plastid:20061580;plastid…												AT3G48140
AT2G35010	thioredoxin O1;	mitochondrion	plastid:12707279	extracellular:26572690;mitochondrion:21472856;mitochondrion:22923678;mitochondrion:23444301;mitochondrion:27943495;mitochondrion:23444301												AT5G58330
AT2G35120	Single hybrid motif superfamily protein;	mitochondrion		mitochondrion:14671022;mitochondrion:17137349;mitochondrion:18385124;mitochondrion:21296373;mitochondrion:21472856;mitochondrion:22923678												AT3G08580
AT2G35605	SWIB/MDM2 domain superfamily protein;	mitochondrion	mitochondrion:22797472;plastid:22797472	mitochondrion:21472856;mitochondrion:27943495;plastid:26987276												AT5G06580
AT2G38670	phosphorylethanolamine cytidylyltransferase 1;Encodes a mitochondrial ethanolamine-phosphate cytidylyltransferase, involved in phosphatidylethanolamine (PE) biosynthesis.	mitochondrion	mitochondrion:21896887	mitochondrion:14671022;mitochondrion:21472856;mitochondrion:21841088;mitochondrion:22923678;mitochondrion:27943495;mitochondrion:21896887;plasma membrane:19334764												AT3G07480
AT2G44350	Citrate synthase family protein;encodes a mitochrondrion targeted citrate synthase, the first enzyme of the tricarboxylic acid cycle, catalyzing the condensation of acetyl-CoA and oxaloacetate, finally yielding citrate and CoA.	mitochondrion		extracellular:15157177;extracellular:26572690;mitochondrion:11743115;mitochondrion:14671022;mitochondrion:17137349;mitochondrion:18385124;mitochondrion:21472856;mitochondrion:21841088;mitochondrion:22923678;mitochondrion:23444301;mitochondrion:24727099;mitochondrion:27122571;mitochondrion:27943495;mitochondrion:23444301;plasma membrane:21433285;plastid:18431481												AT3G15020
AT2G47510	fumarase 1;Encodes a mitochondrial-localized protein. The FUM1 gene appears to be essential, suggesting that FUM1 may play a crucial role as a fumarase in the tricarboxylic acid cycle.	mitochondrion	mitochondrion:20202172	mitochondrion:11743115;mitochondrion:12492832;mitochondrion:14671022;mitochondrion:18385124;mitochondrion:21472856;mitochondrion:21841088;mitochondrion:22923678;mitochondrion:23444301;mitochondrion:24727099;mitochondrion:27943495;mitochondrion:23444301												AT3G20330
AT3G01280	voltage dependent anion channel 1;Encodes a voltage-dependent anion channel (VDAC: AT3G01280/VDAC1, AT5G67500/VDAC2, AT5G15090/VDAC3, AT5G57490/VDAC4, AT5G15090/VDAC5). VDACs are reported to be porin-type, beta-barrel diffusion pores. They are prominently localized in the outer mitochondrial membrane and are involved in metabolite exchange between the organelle and the cytosol.	mitochondrion	mitochondrion:21705391	golgi:25900983;golgi:25900983;golgi:25900983;golgi:25900983;golgi:25900983;mitochondrion:11743114;mitochondrion:11743115;mitochondrion:14671022;mitochondrion:15276431;mitochondrion:21472856;mitochondrion:21841088;mitochondrion:22923678;mitochondrion:23444301;mitochondrion:24727099;mitochondrion:27122571;mitochondrion:27943495;mitochondrion:21896887;nucleus:24012629;plasma membrane:25641898;plasma…												AT5G13490
AT3G06050	peroxiredoxin IIF;Encodes a mitochondrial matrix localized peroxiredoxin involved in redox homeostasis. Knockout mutants have reduced root growth under certain oxidative stress conditions.	mitochondrion		extracellular:26572690;mitochondrion:11743114;mitochondrion:12492832;mitochondrion:14671022;mitochondrion:18385124;mitochondrion:21296373;mitochondrion:21472856;mitochondrion:21841088;mitochondrion:22923678;mitochondrion:23444301;mitochondrion:27122571;mitochondrion:27943495;mitochondrion:23444301;plasma membrane:19334764;plastid:24361574												AT4G21090
AT3G07480	2Fe-2S ferredoxin-like superfamily protein;	mitochondrion	mitochondrion:19036033;mitochondrion:in house	mitochondrion:11743115;mitochondrion:14671022;mitochondrion:18385124;mitochondrion:22923678;mitochondrion:27122571;mitochondrion:27943495;plasma membrane:19334764;plastid:15028209												AT4G13850
AT3G08580	ADP/ATP carrier 1;mitochondrial ADP/ATP carrier	mitochondrion		extracellular:26572690;golgi:25900983;golgi:25900983;golgi:25900983;golgi:25900983;golgi:25900983;mitochondrion:12586869;mitochondrion:14671022;mitochondrion:15276431;mitochondrion:15295017;mitochondrion:21296373;mitochondrion:21472856;mitochondrion:21841088;mitochondrion:22923678;mitochondrion:23444301;mitochondrion:24727099;mitochondrion:27943495;mitochondrion:21896887;nucleus:14505352;nucleus:…												AT1G32380
AT3G09810	isocitrate dehydrogenase VI;Encodes a catalytic subunit of the mitochondrially-localized NAD+- dependent isocitrate dehydrogenase	mitochondrion	mitochondrion:21896887	extracellular:26572690;golgi:25900983;golgi:25900983;golgi:25900983;golgi:25900983;mitochondrion:14671022;mitochondrion:21472856;mitochondrion:21841088;mitochondrion:23444301;mitochondrion:24727099;mitochondrion:21896887;mitochondrion:23444301;vacuole:25900983												AT1G47420
AT3G10920	manganese superoxide dismutase 1;manganese superoxide dismutase (MSD1)	mitochondrion		extracellular:26572690;golgi:25900983;golgi:25900983;golgi:25900983;mitochondrion:11743114;mitochondrion:11743115;mitochondrion:12606038;mitochondrion:12970493;mitochondrion:14671022;mitochondrion:21472856;mitochondrion:21841088;mitochondrion:23444301;mitochondrion:24727099;mitochondrion:27943495;mitochondrion:23444301;plastid:20061580;plastid:23851315;plastid:24361574												AT4G02580
AT3G13860	heat shock protein 60-3A;	mitochondrion		mitochondrion:14671022;mitochondrion:15276431;mitochondrion:18385124;mitochondrion:21472856;mitochondrion:21841088;mitochondrion:22923678;mitochondrion:27943495;plasma membrane:19334764;plasma membrane:21433285;vacuole:17151019												AT5G23140
AT3G13930	Dihydrolipoamide acetyltransferase, long form protein;	mitochondrion		extracellular:26572690;golgi:25900983;mitochondrion:14671022;mitochondrion:14764908;mitochondrion:15276431;mitochondrion:21472856;mitochondrion:21841088;mitochondrion:22923678;mitochondrion:23444301;mitochondrion:24727099;mitochondrion:27943495;nucleus:27177187;nucleus:23396599;plasma membrane:19334764;plasma membrane:21433285;plastid:12938931;plastid:15028209												AT2G05710
AT3G15020	Lactate/malate dehydrogenase family protein;	mitochondrion		extracellular:26572690;mitochondrion:12586869;mitochondrion:14671022;mitochondrion:21472856;mitochondrion:21841088;mitochondrion:24727099;mitochondrion:27122571;mitochondrion:27943495;plastid:21531424;plastid:24361574												AT1G31230
AT3G15640	Rubredoxin-like superfamily protein;	mitochondrion		mitochondrion:12606038;mitochondrion:12970493;mitochondrion:15604729;mitochondrion:21472856;mitochondrion:22923678;mitochondrion:23444301;mitochondrion:27122571;mitochondrion:27943495;mitochondrion:23444301;plastid:14729914												AT1G14980
AT3G16700	Fumarylacetoacetate (FAA) hydrolase family;	mitochondrion		mitochondrion:21472856												AT2G02740
AT3G17240	lipoamide dehydrogenase 2;lipoamide dehydrogenase precursor	mitochondrion		extracellular:26572690;mitochondrion:11743114;mitochondrion:11743115;mitochondrion:14671022;mitochondrion:14764908;mitochondrion:17137349;mitochondrion:18385124;mitochondrion:20197505;mitochondrion:21472856;mitochondrion:21841088;mitochondrion:22923678;mitochondrion:24727099;mitochondrion:27122571;mitochondrion:27943495;plasma membrane:21433285;plastid:15028209;plastid:24361574;vacuole:15215502												AT3G10670
AT3G17300	;	mitochondrion		mitochondrion:27943495												AT1G80230
AT3G23990	heat shock protein 60;mitochondrial chaperonin HSP. assist in rapid assembly of the oligomeric protein structures in the mitochondria.	mitochondrion	mitochondrion:10948212	cytosol:15734919;extracellular:26572690;golgi:25900983;golgi:25900983;golgi:25900983;golgi:25900983;golgi:25900983;mitochondrion:11743115;mitochondrion:14671022;mitochondrion:15276431;mitochondrion:17137349;mitochondrion:21472856;mitochondrion:21841088;mitochondrion:22923678;mitochondrion:23444301;mitochondrion:24727099;mitochondrion:27122571;mitochondrion:27943495;mitochondrion:21896887;mitochon…												AT5G63400
AT3G45770	Polyketide synthase, enoylreductase family protein;	mitochondrion	mitochondrion:19036033	extracellular:26572690;mitochondrion:14671022;mitochondrion:17137349;mitochondrion:21841088;mitochondrion:27943495;nucleus:14617066;plastid:18431481												AT3G54050
AT3G46560	Tim10/DDP family zinc finger protein;Encodes a small zinc finger-like protein that is a component of the mitochondrial protein import apparatus.	mitochondrion	nucleus:in house	extracellular:26572690;mitochondrion:14730085;mitochondrion:21472856;mitochondrion:21841088;mitochondrion:24727099;mitochondrion:27122571;mitochondrion:27943495;mitochondrion:21896887												AT5G19760
AT3G48000	aldehyde dehydrogenase 2B4;Encodes a putative (NAD+) aldehyde dehydrogenase.	mitochondrion	unclear:10737809	extracellular:26572690;mitochondrion:11743115;mitochondrion:14671022;mitochondrion:17137349;mitochondrion:18385124;mitochondrion:21472856;mitochondrion:21841088;mitochondrion:22923678;mitochondrion:24727099;mitochondrion:27122571;mitochondrion:27943495;plasma membrane:21433285;plastid:15028209;plastid:24361574												AT1G53240
AT3G52200	Dihydrolipoamide acetyltransferase, long form protein;dihydrolipoamide S-acetyltransferase (LTA3) mRNA, nuclear	mitochondrion		cytoskeleton:24134884;mitochondrion:12492832;mitochondrion:14671022;mitochondrion:14764908;mitochondrion:17137349;mitochondrion:18385124;mitochondrion:21472856;mitochondrion:21841088;mitochondrion:22923678;mitochondrion:23444301;mitochondrion:24727099;mitochondrion:27943495;plasma membrane:19334764;plasma membrane:21433285												AT1G50940
AT3G52300	ATP synthase D chain, mitochondrial;	mitochondrion		cytosol:15734919;golgi:25900983;golgi:25900983;mitochondrion:11743114;mitochondrion:11743115;mitochondrion:11870776;mitochondrion:12681508;mitochondrion:14671022;mitochondrion:15276431;mitochondrion:18189341;mitochondrion:21296373;mitochondrion:21472856;mitochondrion:21841088;mitochondrion:22923678;mitochondrion:23444301;mitochondrion:24727099;mitochondrion:27122571;mitochondrion:27943495;mitocho…												AT1G51560
AT3G52570	alpha/beta-Hydrolases superfamily protein;	mitochondrion		mitochondrion:17137349;mitochondrion:27943495												AT5G55070
AT3G54110	plant uncoupling mitochondrial protein 1;Member of Uncoupling protein PUMP2 family. Encodes a mitochondrial uncoupling protein AtUCP1 involved in maintain the redox poise of the mitochondrial electron transport chain to facilitate photosynthetic metabolism. Disruption of UCP1 results in a photosynthetic phenotype. Specifically there is a restriction in photorespiration with a decrease in the rate…	mitochondrion		golgi:25900983;golgi:25900983;golgi:25900983;golgi:25900983;golgi:25900983;mitochondrion:12586869;mitochondrion:14671022;mitochondrion:15276431;mitochondrion:21472856;mitochondrion:21841088;mitochondrion:22923678;mitochondrion:23444301;mitochondrion:24727099;mitochondrion:27943495;mitochondrion:21896887;plasma membrane:25641898;plasma membrane:19334764;plastid:15028209;unclear:16618929;vacuole:17…												AT3G54110
AT3G55410	2-oxoglutarate dehydrogenase, E1 component;	mitochondrion		golgi:25900983;mitochondrion:14671022;mitochondrion:21472856;mitochondrion:21841088;mitochondrion:22923678;mitochondrion:24727099;mitochondrion:27943495;nucleus:27177187;nucleus:23396599;plasma membrane:25641898;plasma membrane:19334764;plasma membrane:21433285												AT4G29130
AT3G59760	O-acetylserine (thiol) lyase isoform C;Arabidopsis thaliana O-acetylserine (thiol) lyase (OAS-TL) isoform oasC	mitochondrion		extracellular:26572690;mitochondrion:11743115;mitochondrion:14671022;mitochondrion:17137349;mitochondrion:21296373;mitochondrion:21472856;mitochondrion:21841088;mitochondrion:23444301;mitochondrion:27943495;mitochondrion:23444301;plastid:15028209;plastid:18431481;plastid:20423899;plastid:20061580;plastid:24361574;plastid:24872594												AT2G35120
AT3G61440	cysteine synthase C1;Encodes a cysteine synthase isomer CysC1. The isomer is however less effective in cysteine biosynthesis. It is involved in beta-cyanoalanine biosynthesis, an intermediate of cyanide detoxification pathway.	mitochondrion		extracellular:26572690;mitochondrion:11743114;mitochondrion:14671022;mitochondrion:18385124;mitochondrion:21296373;mitochondrion:21472856;mitochondrion:21841088;mitochondrion:22923678;mitochondrion:23444301;mitochondrion:24727099;mitochondrion:27943495;mitochondrion:23444301;plastid:15028209;plastid:18431481;plastid:24361574												AT2G35010
AT4G00570	NAD-dependent malic enzyme 2;Encodes an NAD-dependent malic enzyme (NAD-ME) that does not act on oxaloacetate, indicating that it belongs to EC 1.1.1.39. It is a member of the beta family of NAD-MEs in plants. It appears to function as a homodimer or as a heterodimer with the alpha-type NAD-ME2 (At2g13560). NAD-ME2 transcript and protein levels are higher during the night than during the day.	mitochondrion		mitochondrion:14671022;mitochondrion:17137349;mitochondrion:21472856;mitochondrion:21841088;mitochondrion:22923678;mitochondrion:23444301;mitochondrion:27122571;mitochondrion:27943495;mitochondrion:23444301;plasma membrane:19334764;plastid:15028209												AT5G50810
AT4G00860	Protein of unknown function (DUF1138);putative pathogenesis-related protein whose transcript level is induced in response to ozone and pathogenic Pseudomonas strains.	mitochondrion		mitochondrion:14671022;mitochondrion:15604729;mitochondrion:21841088;mitochondrion:22923678;mitochondrion:27122571;mitochondrion:27943495;mitochondrion:21896887;peroxisome:17951448;plasma membrane:19334764;plastid:20061580;unclear:16618929												AT1G62640
AT4G02580	NADH-ubiquinone oxidoreductase 24 kDa subunit, putative;	mitochondrion		extracellular:26572690;golgi:25900983;golgi:25900983;mitochondrion:11743115;mitochondrion:12492832;mitochondrion:12837548;mitochondrion:14671022;mitochondrion:17406791;mitochondrion:18189341;mitochondrion:18385124;mitochondrion:20197505;mitochondrion:21472856;mitochondrion:21841088;mitochondrion:22923678;mitochondrion:23444301;mitochondrion:23761796;mitochondrion:27122571;mitochondrion:27943495;m…												AT4G39200
AT4G02930	GTP binding Elongation factor Tu family protein;	mitochondrion		extracellular:26572690;golgi:25900983;golgi:25900983;golgi:25900983;golgi:25900983;golgi:25900983;mitochondrion:11743114;mitochondrion:11743115;mitochondrion:14671022;mitochondrion:17137349;mitochondrion:21472856;mitochondrion:21841088;mitochondrion:22923678;mitochondrion:23444301;mitochondrion:27122571;mitochondrion:27943495;mitochondrion:21896887;mitochondrion:23444301;plasma membrane:19334764;…												AT4G34740
AT4G08900	arginase;Encodes an arginase, likely to be involved in polyamine biosynthesis in pollen.	mitochondrion		mitochondrion:21841088;mitochondrion:27943495;plastid:15028209;plastid:24361574												AT3G54660
AT4G11010	nucleoside diphosphate kinase 3;nucleoside diphosphate kinase 3 (ndpk3), located to the inter-membrane space in mitochondria	mitochondrion	mitochondrion:19036033	extracellular:26572690;mitochondrion:11743114;mitochondrion:12492832;mitochondrion:14671022;mitochondrion:18385124;mitochondrion:21472856;mitochondrion:21841088;mitochondrion:22923678;mitochondrion:23444301;mitochondrion:24727099;mitochondrion:27943495;mitochondrion:21896887;nucleus:27177187;nucleus:23396599;plasma membrane:25641898;plasma membrane:19334764;plasma membrane:22215637;unclear:166189…												AT4G35260
AT4G13850	glycine-rich RNA-binding protein 2;Encodes a glycine-rich RNA-binding protein. Gene expression is induced by cold.	mitochondrion		extracellular:26572690;mitochondrion:11743114;mitochondrion:11743115;mitochondrion:14671022;mitochondrion:17137349;mitochondrion:18385124;mitochondrion:21472856;mitochondrion:27943495;plasma membrane:19334764												ATMG00480
AT4G15940	Fumarylacetoacetate (FAA) hydrolase family;	mitochondrion		mitochondrion:11743115;mitochondrion:14671022;mitochondrion:21472856;mitochondrion:21841088;mitochondrion:27943495												AT1G06130
AT4G21090	MITOCHONDRIAL FERREDOXIN 2;	mitochondrion	mitochondrion:13677469													AT1G03680
AT4G21105	cytochrome-c oxidases;electron carriers;	mitochondrion		mitochondrion:14671022;mitochondrion:15604729;mitochondrion:21841088;mitochondrion:27943495;vacuole:17151019												AT5G14780
AT4G22310	Uncharacterised protein family (UPF0041);	mitochondrion		mitochondrion:14671022;mitochondrion:15276431;mitochondrion:21296373;mitochondrion:21472856;mitochondrion:22923678;mitochondrion:23444301;mitochondrion:27122571;mitochondrion:27943495;plasma membrane:19334764												ATCG00490
AT4G26780	Co-chaperone GrpE family protein;unknown function	mitochondrion	mitochondrion:in house	mitochondrion:19688752;mitochondrion:21472856;mitochondrion:22923678;mitochondrion:27943495												AT2G38670
AT4G26970	aconitase 2;Encodes an aconitase that can catalyze the conversion of citrate to isocitrate through a cis-aconitate intermediate, indicating that it may participate in the TCA cycle and other primary metabolic pathways. The protein is believed to accumulate in the mitochondria and the cytosol. It affects CSD2 (At2g28190 - a superoxide dismutase) transcript levels and may play a role in the respons…	mitochondrion	mitochondrion:in house;plastid:in house	extracellular:26572690;mitochondrion:11743114;mitochondrion:11743115;mitochondrion:14671022;mitochondrion:18385124;mitochondrion:21472856;mitochondrion:21841088;mitochondrion:22923678;mitochondrion:24727099;mitochondrion:27943495;plasma membrane:19334764;plasma membrane:21433285;plastid:18431481;plastid:24361574												AT2G33210
AT4G27585	SPFH/Band 7/PHB domain-containing membrane-associated protein family;	mitochondrion		golgi:25900983;golgi:25900983;golgi:25900983;mitochondrion:11743115;mitochondrion:14671022;mitochondrion:18385124;mitochondrion:19688752;mitochondrion:21472856;mitochondrion:22923678;mitochondrion:27122571;mitochondrion:27943495;mitochondrion:21896887;plasma membrane:19334764;plasma membrane:21433285;unclear:16618929;vacuole:25900983												AT3G06050
AT4G29130	hexokinase 1;Encodes a hexokinase (HXK1) in the plant glucose-signaling network. Functions as a glucose sensor to interrelate nutrient, light, and hormone signaling networks for controlling growth and development in response to the changing environment.	mitochondrion	mitochondrion:17530285;mitochondrion:23257241;unclear:18931141	golgi:25900983;golgi:25900983;golgi:25900983;golgi:25900983;mitochondrion:14671022;mitochondrion:21472856;mitochondrion:21841088;mitochondrion:22923678;mitochondrion:27122571;mitochondrion:27943495;mitochondrion:21896887;plasma membrane:19334764;plasma membrane:21433285;plastid:21531424;plastid:20061580;plastid:24872594;unclear:16618929;vacuole:17151019;vacuole:25900983												AT3G17300
AT4G33010	glycine decarboxylase P-protein 1;	mitochondrion		mitochondrion:14671022;mitochondrion:18385124;mitochondrion:21296373;mitochondrion:21472856;mitochondrion:21841088;mitochondrion:23444301;mitochondrion:24727099;mitochondrion:27943495;plastid:12938931;plastid:21531424;plastid:23851315;plastid:20061580;plastid:24361574;plastid:20061580												AT5G27380
AT4G35260	isocitrate dehydrogenase 1;Encodes a regulatory subunit of the mitochondrially-localized NAD+- dependent isocitrate dehydrogenase.	mitochondrion		extracellular:26572690;golgi:25900983;golgi:25900983;golgi:25900983;golgi:25900983;golgi:25900983;mitochondrion:11743115;mitochondrion:14671022;mitochondrion:21472856;mitochondrion:21841088;mitochondrion:22923678;mitochondrion:23444301;mitochondrion:27943495;mitochondrion:21896887;mitochondrion:23444301;plasma membrane:19334764;vacuole:25900983												AT1G59900
AT4G35460	NADPH-dependent thioredoxin reductase B;NADPH-dependent thioredoxin reductase 1 (NTR1. Similar to E.coli NTR and has conserved NADPH binding domains.	mitochondrion		extracellular:26572690;mitochondrion:21472856;mitochondrion:21841088;mitochondrion:23444301;mitochondrion:27943495;mitochondrion:23444301;plasma membrane:25641898;plastid:12938931												AT1G53580
AT4G39660	alanine:glyoxylate aminotransferase 2;alanine:glyoxylate aminotransferase 2 homolog (AGT2) mRNA,	mitochondrion	mitochondrion:19036033;peroxisome:19036033	extracellular:26572690;mitochondrion:14671022;mitochondrion:18385124;mitochondrion:21472856;mitochondrion:21841088;mitochondrion:27943495;vacuole:17151019												AT3G55410
AT5G03290	isocitrate dehydrogenase V;Encodes a catalytic subunit of the mitochondrially-localized NAD+- dependent isocitrate dehydrogenase.	mitochondrion	mitochondrion:19036033	extracellular:26572690;golgi:25900983;golgi:25900983;golgi:25900983;golgi:25900983;golgi:25900983;mitochondrion:14671022;mitochondrion:17137349;mitochondrion:21472856;mitochondrion:21841088;mitochondrion:22923678;mitochondrion:23444301;mitochondrion:24727099;mitochondrion:27122571;mitochondrion:27943495;mitochondrion:23444301;plastid:15028209												AT4G01900
AT5G06580	FAD-linked oxidases family protein;Encodes a protein with glycolate dehydrogenase activity, which was shown to complement various subunits of the E. coli glycolate oxidase complex. It has not been ruled out that the enzyme might be involved in other catalytic activities in vivo.	mitochondrion		mitochondrion:17137349;mitochondrion:21841088;mitochondrion:24727099;mitochondrion:27943495												AT3G23990
AT5G07440	glutamate dehydrogenase 2;Encodes the beta-subunit of the glutamate dehydrogenase. The enzyme is almost exclusively found in the mitochondria of stem and leaf companion cells.	mitochondrion		extracellular:18998720;extracellular:26572690;golgi:25900983;golgi:25900983;golgi:25900983;golgi:25900983;golgi:25900983;mitochondrion:11743115;mitochondrion:14671022;mitochondrion:17137349;mitochondrion:18385124;mitochondrion:19688752;mitochondrion:21296373;mitochondrion:21472856;mitochondrion:21841088;mitochondrion:22923678;mitochondrion:23444301;mitochondrion:24727099;mitochondrion:27122571;mi…												AT4G14430
AT5G08690	ATP synthase alpha/beta family protein;Encodes the mitochondrial ATP synthase beta-subunit. This subunit is encoded by a multigene family of three members (At5g08670, At5g08680, At5g08690) that shared 98% sequence identity at the amino acid level.	mitochondrion		golgi:25900983;golgi:25900983;golgi:25900983;golgi:25900983;golgi:25900983;mitochondrion:11743114;mitochondrion:11743115;mitochondrion:11870776;mitochondrion:12492832;mitochondrion:12681508;mitochondrion:14671022;mitochondrion:18189341;mitochondrion:20197505;mitochondrion:23444301;mitochondrion:24727099;mitochondrion:27943495;mitochondrion:23444301;nucleus:15496452;nucleus:24012629;plasma membran…												AT2G44350
AT5G09590	mitochondrial HSO70 2;heat shock protein 70 (Hsc70-5); nuclear	mitochondrion	mitochondrion:19995732	extracellular:26572690;golgi:25900983;golgi:25900983;golgi:25900983;golgi:25900983;mitochondrion:11743115;mitochondrion:14671022;mitochondrion:17137349;mitochondrion:21472856;mitochondrion:21841088;mitochondrion:22923678;mitochondrion:23444301;mitochondrion:27122571;mitochondrion:27943495;nucleus:23396599;plasma membrane:21433285;plasma membrane:22318864;plastid:15028209;plastid:24361574;vacuole:…												AT2G32520
AT5G10860	Cystathionine beta-synthase (CBS) family protein;	mitochondrion		extracellular:26572690;mitochondrion:11743114;mitochondrion:11743115;mitochondrion:14671022;mitochondrion:18385124;mitochondrion:21472856;mitochondrion:21841088;mitochondrion:22923678;mitochondrion:23444301;mitochondrion:24727099;mitochondrion:27122571;mitochondrion:27943495;mitochondrion:23444301;plastid:23549413												AT4G26780
AT5G13430	Ubiquinol-cytochrome C reductase iron-sulfur subunit;	mitochondrion		golgi:25900983;mitochondrion:11870776;mitochondrion:12606038;mitochondrion:14671022;mitochondrion:18189341;mitochondrion:21472856;mitochondrion:21841088;mitochondrion:23444301;mitochondrion:27122571												AT4G30920
AT5G13450	delta subunit of Mt ATP synthase;	mitochondrion		golgi:25900983;golgi:25900983;golgi:25900983;golgi:25900983;golgi:25900983;mitochondrion:11743114;mitochondrion:11743115;mitochondrion:11870776;mitochondrion:12681508;mitochondrion:14671022;mitochondrion:15276431;mitochondrion:18189341;mitochondrion:21472856;mitochondrion:21841088;mitochondrion:22923678;mitochondrion:23444301;mitochondrion:27122571;mitochondrion:27943495;mitochondrion:21896887;mi…												AT3G09810
AT5G13490	ADP/ATP carrier 2;Encodes mitochondrial ADP/ATP carrier	mitochondrion		golgi:25900983;mitochondrion:12586869;mitochondrion:14671022;mitochondrion:15276431;mitochondrion:21472856;mitochondrion:21841088;mitochondrion:22923678;mitochondrion:24727099;mitochondrion:27943495;mitochondrion:21896887;nucleus:14505352;nucleus:23396599;plasma membrane:19334764;plasma membrane:21433285;plastid:12938931;plastid:15028209;plastid:20061580;unclear:16618929;vacuole:17151019												AT2G35605
AT5G14040	phosphate transporter 3;1;	mitochondrion		extracellular:26572690;golgi:25900983;golgi:25900983;golgi:25900983;golgi:25900983;golgi:25900983;mitochondrion:12586869;mitochondrion:14671022;mitochondrion:15276431;mitochondrion:15295017;mitochondrion:21472856;mitochondrion:21841088;mitochondrion:22923678;mitochondrion:24727099;mitochondrion:27943495;mitochondrion:21896887;nucleus:27177187;nucleus:23396599;plasma membrane:25641898;plasma membr…												AT3G10920
AT5G14590	Isocitrate/isopropylmalate dehydrogenase family protein;	mitochondrion		mitochondrion:14671022;mitochondrion:21472856;mitochondrion:21841088;mitochondrion:22923678;mitochondrion:27122571;mitochondrion:27943495;plasma membrane:25641898;plastid:18431481;plastid:21531424;plastid:23851315;plastid:20061580;plastid:24361574;plastid:20061580												AT5G03290
AT5G14780	formate dehydrogenase;Encodes a NAD-dependent formate dehydrogenase.	mitochondrion		golgi:25900983;golgi:25900983;golgi:25900983;golgi:25900983;golgi:25900983;mitochondrion:14671022;mitochondrion:18385124;mitochondrion:19688752;mitochondrion:21296373;mitochondrion:21472856;mitochondrion:23444301;mitochondrion:24727099;mitochondrion:27943495;mitochondrion:23444301;plasma membrane:19334764;plastid:14729914;plastid:15028209;plastid:21531424;plastid:20061580;plastid:24361574;vacuole…												AT3G17240
AT5G18170	glutamate dehydrogenase 1;Encodes the 43 kDa alpha-subunit of the glutamate dehydrogenase with a putative mitochondrial transit polypeptide and NAD(H)- and alpha-ketoglutarate-binding domains. Mitochondrial localization confirmed by subcellular fractionation. Combines in several ratios with GDH2 protein (GDH-beta) to form seven isoenzymes. Catalyzes the cleavage of glycine residues. May be involv…	mitochondrion		extracellular:18998720;extracellular:26572690;mitochondrion:11743114;mitochondrion:11743115;mitochondrion:14671022;mitochondrion:17137349;mitochondrion:18385124;mitochondrion:19688752;mitochondrion:21472856;mitochondrion:21841088;mitochondrion:24727099;mitochondrion:27122571;mitochondrion:27943495;vacuole:15215502;vacuole:23903016												AT1G31160
AT5G19760	Mitochondrial substrate carrier family protein;	mitochondrion	unclear:18931141	golgi:25900983;golgi:25900983;golgi:25900983;golgi:25900983;golgi:25900983;mitochondrion:12586869;mitochondrion:14671022;mitochondrion:15276431;mitochondrion:15295017;mitochondrion:21472856;mitochondrion:21841088;mitochondrion:22923678;mitochondrion:24727099;mitochondrion:27943495;mitochondrion:21896887;plasma membrane:25641898;plasma membrane:19334764;plastid:12938931;plastid:15028209;plastid:24…												AT3G13860
AT5G20080	FAD/NAD(P)-binding oxidoreductase;	mitochondrion		extracellular:16287169;extracellular:26572690;golgi:22430844;mitochondrion:11743114;mitochondrion:14671022;mitochondrion:21472856;mitochondrion:21841088;mitochondrion:24727099;mitochondrion:27943495;mitochondrion:21896887;plasma membrane:19334764												AT3G20390
AT5G23140	nuclear-encoded CLP protease P7;One of several nuclear-encoded ClpPs (caseinolytic protease). Contains a highly conserved catalytic triad of Ser-type proteases (Ser-His-Asp). The name reflects nomenclature described in Adam et. al (2001).	mitochondrion	mitochondrion:14593120;mitochondrion:in house	mitochondrion:11743115;mitochondrion:14671022;mitochondrion:21472856;mitochondrion:21841088;mitochondrion:23444301;mitochondrion:27122571;mitochondrion:27943495;mitochondrion:23444301;plastid:11278690												AT5G07440
AT5G26780	serine hydroxymethyltransferase 2;Encodes a protein with serine hydroxymethyltransferase activity which is thought to be localized in the mitochondrial matrix. SHM2 expression fails to rescue the conditional lethal phenotype of the shm1-1 mutant, defective in SHM1.	mitochondrion		cytosol:21166475;mitochondrion:14671022;mitochondrion:20197505;mitochondrion:21841088;mitochondrion:22923678;mitochondrion:23444301;mitochondrion:24727099;mitochondrion:27122571;mitochondrion:27943495;plasma membrane:21433285;plastid:24361574												AT4G00620
AT5G49555	FAD/NAD(P)-binding oxidoreductase family protein;	mitochondrion		mitochondrion:14671022;mitochondrion:21841088;mitochondrion:27943495												AT3G01120
AT5G50370	Adenylate kinase family protein;	mitochondrion		mitochondrion:14671022;mitochondrion:15276431;mitochondrion:18385124;mitochondrion:21472856;mitochondrion:21841088;mitochondrion:22923678;mitochondrion:24727099;mitochondrion:27943495;mitochondrion:21896887;plasma membrane:19334764;unclear:16618929;vacuole:17151019												AT5G18170
AT5G50810	translocase inner membrane subunit 8;Encodes a small zinc finger-like protein that is a component of the mitochondrial protein import apparatus.	mitochondrion		mitochondrion:14730085;mitochondrion:22923678;mitochondrion:27122571;mitochondrion:27943495;mitochondrion:21896887												AT5G52520
AT5G50850	Transketolase family protein;	mitochondrion		golgi:25900983;golgi:25900983;golgi:25900983;golgi:25900983;golgi:25900983;mitochondrion:11743114;mitochondrion:11743115;mitochondrion:14671022;mitochondrion:15276431;mitochondrion:21472856;mitochondrion:21841088;mitochondrion:22923678;mitochondrion:23444301;mitochondrion:27122571;mitochondrion:27943495;mitochondrion:21896887;mitochondrion:23444301;nucleus:15496452;plasma membrane:19334764;plasti…												AT4G26970
AT5G52840	NADH-ubiquinone oxidoreductase-related;	mitochondrion		golgi:25900983;golgi:25900983;golgi:25900983;golgi:25900983;mitochondrion:11743114;mitochondrion:11743115;mitochondrion:12837548;mitochondrion:14671022;mitochondrion:17406791;mitochondrion:18189341;mitochondrion:20197505;mitochondrion:21296373;mitochondrion:21472856;mitochondrion:21841088;mitochondrion:22923678;mitochondrion:23444301;mitochondrion:23761796;mitochondrion:27122571;mitochondrion:279…												AT1G02560
AT5G55070	Dihydrolipoamide succinyltransferase;	mitochondrion		golgi:25900983;golgi:25900983;golgi:25900983;golgi:25900983;mitochondrion:12492832;mitochondrion:14671022;mitochondrion:14764908;mitochondrion:15276431;mitochondrion:18385124;mitochondrion:21296373;mitochondrion:21472856;mitochondrion:22923678;mitochondrion:23444301;mitochondrion:24727099;mitochondrion:27122571;mitochondrion:27943495;nucleus:23396599;plasma membrane:25641898;plasma membrane:19334…												AT2G30970
AT5G57490	voltage dependent anion channel 4;Encodes a voltage-dependent anion channel (VDAC: AT3G01280/VDAC1, AT5G67500/VDAC2, AT5G15090/VDAC3, AT5G57490/VDAC4, AT5G15090/VDAC5). VDACs are reported to be porin-type, beta-barrel diffusion pores. They are prominently localized in the outer mitochondrial membrane and are involved in metabolite exchange between the organelle and the cytosol.	mitochondrion	mitochondrion:21705391	mitochondrion:14671022;mitochondrion:15276431;mitochondrion:21296373;mitochondrion:21841088;mitochondrion:22923678;mitochondrion:27943495;mitochondrion:21896887;plasma membrane:15060130;plasma membrane:19334764;unclear:16618929												AT2G27510
AT5G61030	glycine-rich RNA-binding protein 3;encodes a glycine-rich RNA binding protein. Gene expression is induced by cold.	mitochondrion		mitochondrion:14671022;mitochondrion:17137349;mitochondrion:19688752;mitochondrion:21841088;mitochondrion:27943495												AT2G13560
AT5G62530	aldehyde dehydrogenase 12A1;Encodes mitochondrial Delta-pyrroline-5- carboxylate dehydrogenase. Involved in the catabolism of proline to glutamate. Involved in protection from proline toxicity. Induced at pathogen infection sites. P5CDH and SRO5 (an overlapping gene in the sense orientation) generate 24-nt and 21-nt siRNAs, which together are components of a regulatory loop controlling reactive o…	mitochondrion		mitochondrion:11743115;mitochondrion:14671022;mitochondrion:21296373;mitochondrion:21472856;mitochondrion:21841088;mitochondrion:24727099;mitochondrion:27943495;plastid:15028209												AT5G10920
AT5G63400	adenylate kinase 1;encodes a protein similar to adenylate kinase.	mitochondrion		extracellular:26572690;golgi:25900983;golgi:25900983;golgi:25900983;mitochondrion:11743115;mitochondrion:14671022;mitochondrion:15276431;mitochondrion:21472856;mitochondrion:21841088;mitochondrion:22923678;mitochondrion:24727099;mitochondrion:27122571;mitochondrion:27943495;mitochondrion:21896887;plasma membrane:19334764;plastid:23549413;unclear:16618929;vacuole:17151019;vacuole:25900983												AT1G48030
AT5G63620	GroES-like zinc-binding alcohol dehydrogenase family protein;	mitochondrion		mitochondrion:21472856;mitochondrion:21841088;mitochondrion:23444301;mitochondrion:27943495;mitochondrion:23444301												AT4G35460
AT5G65750	2-oxoglutarate dehydrogenase, E1 component;	mitochondrion		mitochondrion:14671022;mitochondrion:21472856;mitochondrion:21841088;mitochondrion:22923678;mitochondrion:24727099;mitochondrion:27943495;nucleus:23396599;plasma membrane:19334764;plasma membrane:21433285												AT2G47510
AT5G66760	succinate dehydrogenase 1-1;One of two genes in Arabidopsis that encode a flavoprotein subunit of the mitochondrial succinate dehydrogenase complex.	mitochondrion		golgi:25900983;golgi:25900983;golgi:25900983;golgi:25900983;mitochondrion:11743114;mitochondrion:11743115;mitochondrion:12970493;mitochondrion:14671022;mitochondrion:15276431;mitochondrion:15604729;mitochondrion:17137349;mitochondrion:19688752;mitochondrion:21472856;mitochondrion:21841088;mitochondrion:22923678;mitochondrion:23444301;mitochondrion:24727099;mitochondrion:27122571;mitochondrion:279…												AT4G03520
AT5G67500	voltage dependent anion channel 2;Encodes a voltage-dependent anion channel (VDAC: AT3G01280/VDAC1, AT5G67500/VDAC2, AT5G15090/VDAC3, AT5G57490/VDAC4, AT5G15090/VDAC5). VDACs are reported to be porin-type, beta-barrel diffusion pores. They are prominently localized in the outer mitochondrial membrane and are involved in metabolite exchange between the organelle and the cytosol.	mitochondrion	mitochondrion:21705391	golgi:25900983;golgi:25900983;golgi:25900983;golgi:25900983;golgi:25900983;mitochondrion:14671022;mitochondrion:15276431;mitochondrion:21472856;mitochondrion:21841088;mitochondrion:22923678;mitochondrion:23444301;mitochondrion:24727099;mitochondrion:27943495;mitochondrion:21896887;plasma membrane:25641898;plasma membrane:19334764;plastid:12938931;plastid:15028209;unclear:16618929;vacuole:17151019…												AT2G35040
ATMG00480	Plant mitochondrial ATPase, F0 complex, subunit 8 protein;Encodes subunit 8 of the mitochondrial F(O) ATP synthase complex.	mitochondrion		mitochondrion:12681508;mitochondrion:14671022;mitochondrion:18189341;mitochondrion:21841088;mitochondrion:24727099;mitochondrion:27943495;unclear:16618929												AT5G14040
AT2G07698	ATPase, F1 complex, alpha subunit protein;	mitochondrion,plastid		extracellular:26572690;golgi:25900983;golgi:25900983;golgi:25900983;golgi:25900983;golgi:25900983;mitochondrion:15276431;mitochondrion:21841088;mitochondrion:22923678;mitochondrion:24727099;mitochondrion:27122571;mitochondrion:27943495;mitochondrion:21896887;nucleus:15496452;nucleus:24012629;nucleus:23396599;plasma membrane:25641898;plasma membrane:19334764;plasma membrane:20843791;plasma membran…												AT4G33010
AT4G10750	Phosphoenolpyruvate carboxylase family protein;	plastid		mitochondrion:14671022;nucleus:23396599;plastid:15028209;plastid:21531424;plastid:22923678;plastid:20061580;plastid:24872594												AT5G10860
AT3G02230	reversibly glycosylated polypeptide 1;reversibly glycosylated polypeptide possibly involved in plant cell wall synthesis	cytosol	cytosol:21478444;golgi:15879561;golgi:21478444;unclear:15879561	cytosol:15734919;cytosol:21166475;extracellular:18998720;extracellular:26572690;mitochondrion:27122571;nucleus:24012629;plasma membrane:19334764;vacuole:15215502;vacuole:17151019;vacuole:23903016;vacuole:25900983												AT4G34290
AT4G13930	serine hydroxymethyltransferase 4;Encodes a serine hydroxymethyltransferase maximally expressed in root	cytosol		cytosol:21166475;extracellular:26572690;golgi:25900983;golgi:25900983;mitochondrion:27943495;plasma membrane:25641898;plasma membrane:17644812;plasma membrane:19334764;plasma membrane:22215637;plasma membrane:26781341;plastid:24361574												AT5G50370
AT5G17920	Cobalamin-independent synthase family protein;Encodes a cytosolic cobalamin-independent methionine synthase, involved in methionine regeneration via the activated methyl cycle (SAM cycle). The protein undergoes thiolation following treatment with the oxidant tert-butylhydroperoxide.	cytosol	cytosol:15024005;peroxisome:24130194	cytoskeleton:24134884;cytosol:21166475;extracellular:18998720;extracellular:26572690;extracellular:25852701;golgi:25900983;golgi:25900983;golgi:25900983;golgi:25900983;golgi:25900983;mitochondrion:24727099;mitochondrion:27943495;nucleus:27177187;peroxisome:17951448;peroxisome:19329564;peroxisome:24130194;plasma membrane:25641898;plasma membrane:15574830;plasma membrane:17317660;plasma membrane:17…												AT3G52200
AT5G58240	FRAGILE HISTIDINE TRIAD;Encodes a Fhit protein. Has nucleoside phosphoramidase and adenylylsulfatase activities.	cytosol		cytosol:21166475												AT5G20080
AT1G76180	Dehydrin family protein;Encodes a dehydrin protein whose expression is induced early on in response to dehydration stress. This gene's expression to cold occurs in two waves, with early induction occurring within 1 h and secondary induction occurring 5 h after the beginning of cold stress. Expression is also induced in response to ABA but not in response to 2,4-D, BA, and GA3. ERD14 protein is ca…	peroxisome	peroxisome:10737809	cytosol:21166475;extracellular:26572690;mitochondrion:21896887;plasma membrane:25641898;plasma membrane:17317660;plasma membrane:22215637;plasma membrane:22923678;plasma membrane:26781341;plastid:15028209;plastid:18431481;plastid:21531424;plastid:20061580;plastid:20061580;plastid:24361574;vacuole:18686298												AT3G55010
AT2G33830	Dormancy/auxin associated family protein;	peroxisome	peroxisome:10737809													AT3G59760
AT1G12410	CLP protease proteolytic subunit 2;Encodes a ClpP-related sequence. Though similar to ClpP proteins, this does not contains the highly conserved catalytic triad of Ser-type proteases (Ser-His-Asp). The name reflects nomenclature described in Adam et. al (2001).	plastid		golgi:25900983;golgi:25900983;golgi:25900983;golgi:25900983;golgi:25900983;plastid:11278690;plastid:12938931;plastid:16207701;plastid:20423899;plastid:21531424;plastid:23549413;plastid:20061580;plastid:24872594;plastid:18431481;plastid:18633119;plastid:20061580;plastid:24361574;plastid:24872594;plastid:18431481;vacuole:25900983												AT2G22230
AT1G20340	Cupredoxin superfamily protein;recombination and DNA-damage resistance protein (DRT112) One of two Arabidopsis plastocyanin genes. Predominant form, expressed 10x higher than PETE1. PETE2 is thought to be post-transcriptionally regulated via copper accumulation and is involved in copper homeostasis.	plastid		plastid:11719511;plastid:11826309;plastid:14729914;plastid:15028209;plastid:16648217;plastid:20423899;plastid:21531424;plastid:23390424;plastid:24872594;plastid:18633119;plastid:24361574;plastid:24872594;plastid:18431481;plastid:20061580;plastid:24872594												AT2G17265
AT1G48420	D-cysteine desulfhydrase;Encodes an enzyme that decomposes D-cysteine into pyruvate, H2S, and NH3. Only D-cysteine but not L-cysteine was converted by D-CDes to pyruvate, H2S, and NH3. There is conflicting evidence on its 1-aminocyclopropane-1-carboxylate deaminase activity. Involved in regulating ethylene levels.	plastid	cytosol:15720402;mitochondrion:15720402;plastid:23134300	cytosol:21166475;mitochondrion:27122571;mitochondrion:27943495;plastid:15028209;plastid:18431481;plastid:20423899;plastid:20061580;plastid:24361574												AT1G61570
AT1G74960	fatty acid biosynthesis 1;Encodes a plastidic beta-ketoacyl-ACP synthase II, involved in fatty acid elongation from 16:0-ACP to 18:0-ACP. Homozygous knock-out mutants are embryo lethal, indicating early embryo development is sensitive to elevated 16:0.	plastid		golgi:25900983;golgi:25900983;golgi:25900983;plastid:18431481;plastid:20061580;plastid:24361574;vacuole:25900983												AT3G46560
AT2G37020	Translin family protein;	plastid		cytosol:21166475;mitochondrion:21841088;mitochondrion:27943495;plastid:18431481;plastid:20061580												AT3G48000
AT3G60210	GroES-like family protein;	plastid														AT2G19940
AT4G22930	pyrimidin 4;Encodes dihydroorotase (PYR4).	plastid		extracellular:26572690;plastid:18431481;plastid:20423899;plastid:21531424;plastid:20061580;plastid:24361574												AT3G58750
AT5G17530	phosphoglucosamine mutase family protein;	plastid		plastid:20423899;plastid:21531424;plastid:23851315;plastid:18431481;plastid:20061580;plastid:24361574												AT4G11010
AT5G22510	alkaline/neutral invertase;Encodes a chloroplast-targeted alkaline/neutral invertase that is implicated in the development of the photosynthetic apparatus and nitrogen assimilation in seedlings to control the sucrose to hexose ratio.	plastid		plastid:18431481;plastid:20061580;plastid:24361574												AT5G45390
ATCG00120	ATP synthase subunit alpha;Encodes the ATPase alpha subunit, which is a subunit of ATP synthase and part of the CF1 portion which catalyzes the conversion of ADP to ATP using the proton motive force. This complex is located in the thylakoid membrane of the chloroplast.	plastid	nucleus:10737809	cytosol:22522809;golgi:25900983;golgi:25900983;golgi:25900983;golgi:25900983;golgi:25900983;mitochondrion:21472856;mitochondrion:22923678;mitochondrion:27122571;mitochondrion:27943495;mitochondrion:21896887;nucleus:27177187;nucleus:23396599;plasma membrane:19334764;plasma membrane:20843791;plasma membrane:21433285;plasma membrane:22215637;plasma membrane:22318864;plastid:11719511;plastid:11826309…												AT2G16570
ATCG00480	ATP synthase subunit beta;chloroplast-encoded gene for beta subunit of ATP synthase	plastid		golgi:25900983;golgi:25900983;golgi:25900983;golgi:25900983;golgi:25900983;mitochondrion:21472856;mitochondrion:27122571;mitochondrion:27943495;nucleus:23396599;plasma membrane:19334764;plasma membrane:20843791;plasma membrane:21433285;plasma membrane:22215637;plasma membrane:22318864;plastid:11719511;plastid:11826309;plastid:14729914;plastid:15028209;plastid:15322131;plastid:16207701;plastid:166…												AT3G13930
AT2G03680	spiral1;The SPR1 gene encodes a plant-specific 12-kD protein which has a repeated motif at both ends, separated by a predicted rod-like domain, suggesting that it may act as an intermolecular linker. Ubiquitously expressed and belongs to a six-member gene family in Arabidopsis; expressed in transgenic seedlings localized to microtubules within the cortical array, preprophase band, phragmoplast, a…	cytosol	cytoskeleton:15084720;cytoskeleton:15155883													AT2G31725
AT2G32520	alpha/beta-Hydrolases superfamily protein;	cytosol		cytosol:21166475;extracellular:26572690;plasma membrane:26781341;plastid:18431481												AT5G13430
AT3G02870	Inositol monophosphatase family protein;Encodes a L-galactose-1-phosphate phosphatase, involved in ascorbate biosynthesis.	cytosol		cytosol:21166475;extracellular:26572690;plasma membrane:17644812												AT3G52570
AT4G39200	Ribosomal protein S25 family protein;	cytosol,nucleus		cytosol:15821981;cytosol:22522809;extracellular:26572690;golgi:25900983;golgi:25900983;golgi:25900983;golgi:25900983;golgi:25900983;nucleus:23396599;plasma membrane:25641898;plasma membrane:19334764;plasma membrane:22215637;plasma membrane:22318864;plasma membrane:26781341;vacuole:25900983												AT4G00570
AT5G27380	glutathione synthetase 2;Encodes a protein with similarity to glutathione synthetases, which catalyzes one of the early steps in glutathione biosynthesis. Two transcripts have been detected; the longer transcript is less abundant and the protein is localized to the chloroplast. The smaller transcript, in which the transit peptide is truncated, is localized to the cytosol.	cytosol,plastid		cytosol:21166475;mitochondrion:27122571;plasma membrane:15574830;plastid:24361574												AT4G39660
AT2G31725	Eukaryotic protein of unknown function (DUF842);	nucleus		extracellular:26572690;mitochondrion:27943495												AT1G22450
AT5G58005	Cytochrome c oxidase, subunit Vib family protein;	nucleus		extracellular:26572690;mitochondrion:27943495												AT4G24830
AT1G06290	acyl-CoA oxidase 3;Encodes an acyl-CoA oxidase with specificity for medium chain fatty acids.	peroxisome		peroxisome:18931141;peroxisome:19329564;peroxisome:24130194;plasma membrane:21433285												AT2G14170
AT1G20620	catalase 3;Catalase, catalyzes the breakdown of hydrogen peroxide (H2O2) into water and oxygen.	peroxisome	unclear:10737809	golgi:25900983;golgi:25900983;golgi:25900983;golgi:25900983;golgi:25900983;mitochondrion:14671022;mitochondrion:21472856;mitochondrion:21841088;mitochondrion:23444301;mitochondrion:24727099;mitochondrion:27122571;mitochondrion:27943495;nucleus:23396599;peroxisome:12154131;peroxisome:14581625;peroxisome:17951448;peroxisome:18931141;peroxisome:19329564;peroxisome:24130194;plasma membrane:25641898;p…												AT1G79750
AT1G20630	catalase 1;Catalyzes the reduction of hydrogen peroxide using heme group as cofactor. Protects cells from toxicity by H2O2.	peroxisome		mitochondrion:14671022;mitochondrion:21472856;mitochondrion:21841088;nucleus:23396599;peroxisome:17951448;peroxisome:18931141;peroxisome:19329564;peroxisome:24130194;plasma membrane:19334764;plastid:12938931;plastid:24361574												AT4G15940
AT1G50510	indigoidine synthase A family protein;	peroxisome	peroxisome:19329564	cytoskeleton:24134884;peroxisome:18931141;peroxisome:19329564;peroxisome:24130194;plasma membrane:17317660;plastid:21531424												AT1G80600
AT1G54340	isocitrate dehydrogenase;NADP-specific isocitrate dehydrogenase (ICDH)	peroxisome	peroxisome:17951448;peroxisome:18931141	peroxisome:14581625;peroxisome:17951448;peroxisome:18931141;peroxisome:19329564;peroxisome:24130194;plasma membrane:17317660												AT1G32470
AT2G22780	peroxisomal NAD-malate dehydrogenase 1;encodes an peroxisomal NAD-malate dehydrogenase that is involved in fatty acid beta-oxidation through providing NAD to the process of converting fatty acyl CoA to acetyl CoA.	peroxisome		cytoskeleton:24134884;extracellular:26572690;mitochondrion:24727099;mitochondrion:27943495;peroxisome:12154131;peroxisome:14581625;peroxisome:17951448;peroxisome:18931141;peroxisome:19329564;peroxisome:24130194;plastid:18431481												AT2G26080
AT2G26230	uricase / urate oxidase / nodulin 35, putative;	peroxisome		peroxisome:17951448;peroxisome:18931141;peroxisome:19329564;peroxisome:24130194												AT1G79440
AT2G42790	citrate synthase 3;Encodes a peroxisomal citrate synthase that is expressed throughout seedling and shoot development.	peroxisome		cytoskeleton:24134884;golgi:25900983;mitochondrion:27943495;peroxisome:17951448;peroxisome:18931141;peroxisome:19329564;peroxisome:24130194;plasma membrane:19334764												AT1G75330
AT3G01910	sulfite oxidase;Encodes a homodimeric Mo-enzyme with molybdopterin as organic component of the molybdenum cofactor. It lacks the heme domain that other eukaryotic Mo-enzymes possess and has no redox-active centers other than the molybdenum. SO protein has been found in all parts of the plant. The plant SO combines its enzymatic sulfite oxidation with a subsequent nonenzymatic step using its react…	peroxisome	peroxisome:12147736;peroxisome:15653809	cytoskeleton:24134884;mitochondrion:14671022;mitochondrion:27943495;peroxisome:17951448;peroxisome:18931141;peroxisome:19329564;peroxisome:24130194;plastid:24361574												AT3G55400
AT3G12800	short-chain dehydrogenase-reductase B;	peroxisome	peroxisome:17951448;peroxisome:18931141	cytoskeleton:24134884;extracellular:26572690;golgi:25900983;golgi:25900983;golgi:25900983;mitochondrion:27943495;nucleus:23396599;peroxisome:17951448;peroxisome:18931141;peroxisome:19329564;peroxisome:24130194;plastid:20423899;vacuole:17151019;vacuole:25900983												AT5G26780
AT3G15290	3-hydroxyacyl-CoA dehydrogenase family protein;	peroxisome	peroxisome:17951448	peroxisome:17951448;peroxisome:18931141;peroxisome:19329564;peroxisome:24130194												AT1G36280
AT3G16910	acyl-activating enzyme 7;Encodes a peroxisomal protein with acetyl-CoA synthetase activity that is responsible for the activation of acetate for entry into the glyoxylate cycle.	peroxisome	peroxisome:22920973	mitochondrion:27943495;peroxisome:17951448;peroxisome:18931141;peroxisome:19329564;plasma membrane:21433285												AT5G58005
AT3G48140	B12D protein;	peroxisome	peroxisome:19329564	mitochondrion:21296373;mitochondrion:27943495;peroxisome:19329564;plasma membrane:19334764;plasma membrane:23323832												AT3G16700
AT3G48170	aldehyde dehydrogenase 10A9;Arabidopsis thaliana putative betaine aldehyde dehydrogenase	peroxisome	peroxisome:21053011;peroxisome:24130194	mitochondrion:27122571;peroxisome:17951448;peroxisome:18931141;peroxisome:19329564;peroxisome:24130194;plasma membrane:21433285												AT1G20620
AT3G51840	acyl-CoA oxidase 4;Encodes a short-chain acyl-CoA oxidase, which catalyzes the first step of peroxisomal fatty acid beta-oxidation during early, post-germinative growth in oilseed species. Null mutants virtually lack short-chain acyl-CoA and are resistant to 2,4-dichlorophenoxybutyric acid, which is converted to the herbicide and auxin analogue 2,4-dichlorophenoxyacetic acid by beta-oxidation. De…	peroxisome		extracellular:26572690;mitochondrion:27943495;peroxisome:17951448;peroxisome:18931141;peroxisome:19329564;peroxisome:24130194;plasma membrane:19334764												AT1G54220
AT3G56460	GroES-like zinc-binding alcohol dehydrogenase family protein;	peroxisome	peroxisome:19329564	cytoskeleton:24134884;extracellular:26572690;golgi:25900983;peroxisome:18931141;peroxisome:19329564;peroxisome:24130194;plasma membrane:19334764												AT2G44050
AT3G58750	citrate synthase 2;Encodes a peroxisomal citrate synthase that is expressed throughout seedling and shoot development.	peroxisome		cytoskeleton:24134884;mitochondrion:21841088;mitochondrion:27943495;peroxisome:18931141;peroxisome:19329564;peroxisome:24130194												AT2G44530
AT4G14430	indole-3-butyric acid response 10;Encodes a peroxisomal delta3, delta2-enoyl CoA isomerase, involved in unsaturated fatty acid degradation. This enzyme might also be involved in the conversion of indole-3-butyric acid to indole-3-acetic acid via a beta-oxidation-like pathway.	peroxisome	peroxisome:17951448;peroxisome:18931141	extracellular:26572690;mitochondrion:21841088;peroxisome:17951448;peroxisome:18931141;peroxisome:19329564;peroxisome:24130194												AT1G17290
AT4G16760	acyl-CoA oxidase 1;Encodes a medium to long-chain acyl-CoA oxidase. Catalyzes the first step of fatty acid beta-oxidation. Involved in jasmonate biosynthesis. Gene expression is induced by wounding, drought stress, abscisic acid, and jasmonate.	peroxisome		mitochondrion:24727099;mitochondrion:27122571;mitochondrion:27943495;peroxisome:18931141;peroxisome:19329564;peroxisome:24130194;plasma membrane:21433285												AT5G63620
AT4G18360	Aldolase-type TIM barrel family protein;	peroxisome	peroxisome:24130194	mitochondrion:21841088;mitochondrion:24727099;nucleus:23396599;peroxisome:17951448;peroxisome:18931141;peroxisome:24130194;plastid:21531424												AT1G54340
AT4G35090	catalase 2;Encodes a peroxisomal catalase, highly expressed in bolts and leaves. mRNA expression patterns show circadian regulation with mRNA levels being high in the subjective early morning. Loss of function mutations have increased H2O2 levels and increased H2O2 sensitivity. Mutants accumulate more toxic ions yet show decreased sensitivity to Li+. This decreased sensitivity is most likely due …	peroxisome		extracellular:26572690;golgi:25900983;golgi:25900983;golgi:25900983;golgi:25900983;golgi:25900983;mitochondrion:14671022;mitochondrion:21841088;mitochondrion:27943495;nucleus:23396599;peroxisome:12154131;peroxisome:17951448;peroxisome:18931141;peroxisome:19329564;peroxisome:24130194;plasma membrane:25641898;plasma membrane:19334764;plasma membrane:22215637;plastid:15028209;plastid:21531424;plasti…												AT1G22840
AT5G11520	aspartate aminotransferase 3;Encodes the chloroplastic isozyme of aspartate aminotransferase. Involved in aspartate biosynthesis and nitrogen metabolism. mRNA is expressed in senescing leaves.	peroxisome	peroxisome:18931141	mitochondrion:21841088;mitochondrion:27943495;peroxisome:17951448;peroxisome:18931141;peroxisome:19329564;peroxisome:24130194;plasma membrane:19334764;plasma membrane:22318864;plastid:20061580;plastid:24361574;vacuole:23903016;vacuole:25900983												AT2G29530
AT5G43940	GroES-like zinc-binding dehydrogenase family protein;Encodes a glutathione-dependent formaldehyde dehydrogenase (also known as class III type alcohol dehydrogenase) reduces S-nitrosoglutathione (GSNO), the condensation product of glutathione and NO, that is a naturally occurring NO reservoir and also a reactive nitrogen intermediate. Gene expression is reduced by wounding and induced by salicylic…	peroxisome	unclear:18931141	cytosol:21166475;extracellular:26572690;mitochondrion:27122571;peroxisome:17951448;peroxisome:19329564;plasma membrane:25641898;plasma membrane:15574830;plasma membrane:19334764;plasma membrane:26781341;plastid:24361574												AT2G42790
AT1G02560	nuclear encoded CLP protease 5;One of several nuclear-encoded ClpPs (caseinolytic protease). Contains a highly conserved catalytic triad of Ser-type proteases (Ser-His-Asp). The name reflects nomenclature described in Adam et. al (2001).	plastid		golgi:25900983;golgi:25900983;golgi:25900983;golgi:25900983;plasma membrane:25641898;plastid:11278690;plastid:12766230;plastid:12938931;plastid:16207701;plastid:16648217;plastid:20423899;plastid:21531424;plastid:20061580;plastid:24872594;plastid:18431481;plastid:18633119;plastid:20061580;plastid:24361574;plastid:24872594;plastid:18431481												AT3G23940
AT1G03680	thioredoxin M-type 1;encodes a chloroplast thioredoxin similar to prokaryotic thioredoxins.	plastid		mitochondrion:23444301;mitochondrion:23444301;plastid:11826309;plastid:14729914;plastid:15028209;plastid:16207701;plastid:16648217;plastid:20423899;plastid:21531424;plastid:20061580;plastid:24872594;plastid:16923014;plastid:18633119;plastid:20061580;plastid:21539947;plastid:24361574;plastid:24872594;plastid:18431481												AT5G35360
AT1G31160	HISTIDINE TRIAD NUCLEOTIDE-BINDING 2;Encodes a member of the histidine triad nucleotide-binding family of proteins, but its activity has not been determined.	plastid		mitochondrion:27943495;plastid:18431481;plastid:20423899;plastid:21531424;plastid:20061580												AT1G50510
AT1G31180	isopropylmalate dehydrogenase 3;The AtIMD3 is one out of 3 genes encoding the enzyme 3-isopropylmalate dehydrogenase involved in leucine biosynthesis in Arabidopsis. Its subcellular location has been targeted to plastids.	plastid		extracellular:26572690;mitochondrion:27943495;plastid:16207701;plastid:16648217;plastid:20423899;plastid:21531424;plastid:23851315;plastid:18431481;plastid:18633119;plastid:20061580;plastid:24361574;plastid:24872594												AT3G57560
AT1G31230	aspartate kinase-homoserine dehydrogenase i;Encodes a bifunctional aspartate kinase/homoserine dehydrogenase. These two activities catalyze the first and the third steps toward the synthesis of the essential amino acids threonine, isoleucine and methionine.	plastid		plastid:20423899;plastid:21531424;plastid:18431481;plastid:18633119;plastid:20061580;plastid:23549413;plastid:24361574												AT4G08900
AT1G32380	phosphoribosyl pyrophosphate (PRPP) synthase 2;Encodes a P-dependent phosphoribosyl pyrophosphate (PRPP) synthase.	plastid		plastid:24872594												AT3G11630
AT1G36280	L-Aspartase-like family protein;	plastid		cytoskeleton:24134884;extracellular:26572690;mitochondrion:27943495;plastid:20423899;plastid:20061580;plastid:24361574												AT5G65750
AT1G51560	Pyridoxamine 5'-phosphate oxidase family protein;	plastid		plasma membrane:19334764;plastid:24872594												AT2G22780
AT1G62640	3-ketoacyl-acyl carrier protein synthase III;3-ketoacyl-acyl carrier protein synthase III (KAS III)	plastid		golgi:25900983;golgi:25900983;plastid:21531424;plastid:18431481;plastid:20061580;plastid:24361574;vacuole:25900983												AT1G63940
AT1G63940	monodehydroascorbate reductase 6;	plastid	mitochondrion:12954611;plastid:12954611	extracellular:26572690;golgi:25900983;golgi:25900983;golgi:25900983;mitochondrion:12954611;mitochondrion:14671022;mitochondrion:17137349;mitochondrion:21841088;mitochondrion:22923678;mitochondrion:24727099;mitochondrion:27943495;plasma membrane:19334764;plastid:15028209;plastid:16207701;plastid:20423899;plastid:21531424;plastid:23851315;plastid:16923014;plastid:18431481;plastid:18433418;plastid:1…												AT3G45770
AT1G69740	Aldolase superfamily protein;Encodes a putative 5-aminolevulinate dehydratase involved in chlorophyll biosynthesis.	plastid		extracellular:26572690;golgi:25900983;golgi:25900983;golgi:25900983;golgi:25900983;plastid:15028209;plastid:16207701;plastid:20423899;plastid:21531424;plastid:23851315;plastid:18431481;plastid:18633119;plastid:20061580;plastid:24361574												AT4G29840
AT1G75330	ornithine carbamoyltransferase;	plastid		plastid:16207701;plastid:18431481;plastid:18633119;plastid:20061580;plastid:24361574;plastid:24872594												AT1G20630
AT1G79750	NADP-malic enzyme 4;The malic enzyme (EC 1.1.1.40) encoded by AtNADP-ME4 is localized to chloroplasts. The gene is expressed throughout the whole plant and during embryogenesis and germination. A possible involvement in the fatty acid biosynthesis has been proposed.	plastid		extracellular:26572690;mitochondrion:21841088;mitochondrion:27943495;plasma membrane:19334764												AT5G54810
AT1G80560	isopropylmalate dehydrogenase 2;The AtIMD2 is one out of 3 genes encoding the enzyme 3-isopropylmalate dehydrogenase involved in leucine biosynthesis in Arabidopsis. Its subcellular location has been targeted to plastids.	plastid		extracellular:26572690;plastid:12938931;plastid:16207701;plastid:21531424;plastid:18431481;plastid:20061580;plastid:24361574												AT5G62530
AT1G80600	HOPW1-1-interacting 1;Encodes HopW1-1-Interacting protein 1 (WIN1). Interacts with the P. syringae effector HopW1-1. WIN1 is a putative acetylornithine transaminase. Modulates plant defenses against bacteria. Three WIN proteins are identified so far (WIN1: AT1G80600; WIN2: AT4G31750; WIN3: AT5G13320).	plastid	plastid:23321422	extracellular:26572690;plastid:15028209;plastid:16207701;plastid:20423899;plastid:21531424;plastid:23851315;plastid:18431481;plastid:20061580;plastid:24361574												AT4G31990
AT2G02740	ssDNA-binding transcriptional regulator;Encodes a homolog of the potato p24 protein. It shares the conserved KGKAAL domain, a putative DNA-binding domain, with potato p24 and is localized to the plastid and not the nucleus.	plastid	plastid:15967440	extracellular:26572690;golgi:25900983;golgi:25900983;golgi:25900983;golgi:25900983;plastid:21531424;plastid:22616989;plastid:26987276;plastid:18431481;plastid:18433418;plastid:20061580												AT3G51840
AT2G16570	GLN phosphoribosyl pyrophosphate amidotransferase 1;Amidophosphoribosyltransferase (ATase: EC 2.4.2.14) is a key enzyme in the pathway of purine nucleotide biosynthesis	plastid	plastid:21908688	cytosol:21166475;mitochondrion:21841088;plastid:24361574												AT5G43940
AT2G17265	homoserine kinase;Encodes a homoserine kinase (HSK) which produces O-phospho-L-homoserine (HserP), a compound at the branching point of methionine and threonine biosynthesis. HSK is found in the stromal fraction of chloroplasts. Mutants are susceptible to downy mildew fungus Hyaloperonospora parasitica.	plastid	unclear:18931141	extracellular:26572690;plastid:18431481;plastid:20423899;plastid:21531424;plastid:20061580;plastid:24361574;plastid:24872594												AT3G16910
AT2G19940	oxidoreductases, acting on the aldehyde or oxo group of donors, NAD or NADP as acceptor;copper ion binding;	plastid		mitochondrion:27943495;nucleus:15496452;nucleus:27177187;plastid:20423899;plastid:21531424;plastid:18431481;plastid:18633119;plastid:20061580;plastid:24361574;plastid:24872594												AT2G26230
AT2G22230	Thioesterase superfamily protein;	plastid		extracellular:26572690;golgi:25900983;nucleus:24012629;nucleus:23396599;plastid:15028209;plastid:18431481;plastid:21531424;plastid:20061580;plastid:24872594												AT4G32520
AT2G22250	aspartate aminotransferase;Encodes a prokaryotic-type plastidic aspartate aminotransferase with glutamate/aspartate-prephenate aminotransferase (PAT) activity.	plastid		extracellular:26572690;golgi:25900983;golgi:25900983;golgi:25900983;mitochondrion:27122571;plastid:18431481;plastid:21531424;plastid:20061580;plastid:24361574;vacuole:25900983												AT3G61440
AT2G27510	ferredoxin 3;	plastid	plastid:21908688	plastid:24361574												AT3G56090
AT2G29630	thiaminC;Encodes a protein involved in thiamine biosynthesis. The protein is an iron-sulfur cluster protein predicted to catalyze the conversion of 5-aminoimidazole ribonucleotide (AIR) to hydroxymethylpyrimidine phosphate (HMP-P). A severe reduction of THIC levels in plants decreases vitamin B1 (thiamin diphosphate (TPP)) levels and also leads to changes in the levels of numerous other metabolit…	plastid		mitochondrion:27122571;plastid:16207701;plastid:18431481;plastid:18633119;plastid:20061580;plastid:24361574												AT1G69740
AT2G35040	AICARFT/IMPCHase bienzyme family protein;	plastid		extracellular:26572690;plastid:16207701;plastid:21531424;plastid:22923678;plastid:23851315;plastid:16923014;plastid:18431481;plastid:20061580;plastid:21539947;plastid:24361574												AT1G72330
AT2G40490	Uroporphyrinogen decarboxylase;	plastid		mitochondrion:27122571;plastid:12938931;plastid:16207701;plastid:20423899;plastid:21531424;plastid:23851315;plastid:18431481;plastid:18633119;plastid:20061580;plastid:21539947;plastid:24361574;plastid:24872594												AT1G23100
AT2G43750	O-acetylserine (thiol) lyase B;Arabidopsis thaliana O-acetylserine (thiol) lyase (OAS-TL) isoform oasB, the key enzyme for fixation of inorganic sulfide. It catalyzes the formation of cysteine from O-acetylserine and inorganic sulfide.	plastid	plastid:in house	extracellular:26572690;golgi:22923678;golgi:25900983;golgi:25900983;golgi:25900983;golgi:25900983;mitochondrion:11743115;mitochondrion:14671022;mitochondrion:21472856;mitochondrion:27122571;mitochondrion:27943495;plasma membrane:22318864;plastid:12938931;plastid:15028209;plastid:16207701;plastid:20423899;plastid:21531424;plastid:23851315;plastid:18431481;plastid:18433418;plastid:18633119;plastid:…												AT3G15290
AT2G44050	6,7-dimethyl-8-ribityllumazine synthase / DMRL synthase / lumazine synthase / riboflavin synthase;6,7-dimethyl-8-ribityllumazine synthase / DMRL synthase / lumazine synthase / riboflavin synthase [Arabidopsis thaliana]. Acts in the jasmonic acid signaling pathway.	plastid		extracellular:26572690;plastid:15028209;plastid:16207701;plastid:18431481;plastid:20423899;plastid:20061580;plastid:24361574;plastid:24872594												AT5G49555
AT2G44530	Phosphoribosyltransferase family protein;	plastid		golgi:25900983;golgi:25900983;nucleus:23396599;plastid:20423899;plastid:21531424;plastid:22923678;plastid:20061580												AT2G43750
AT3G01120	Pyridoxal phosphate (PLP)-dependent transferases superfamily protein;encodes a cystathionine gamma-synthase, which performs the first committed step in methionine biosynthesis. A conserved motif of 13 amino acids in the first exon is required for posttranscriptional autoregulation. This enzyme shares the same substrate as threonine synthase (TS) and its absence transcriptionally affects 8 genes i…	plastid		cytosol:22522809;plastid:18431481;plastid:20423899;plastid:21531424;plastid:23851315;plastid:20061580;plastid:24361574												AT4G16760
AT3G05020	acyl carrier protein 1;encodes an acyl carrier protein expressed in leaves, roots, and dry seeds. Protein is not regulated by light.	plastid		cytosol:21166475;plastid:21531424;plastid:24361574												AT5G11520
AT3G10670	non-intrinsic ABC protein 7;Plastidic SufC-like ATP-binding cassette/ATPase essential for Arabidopsis embryogenesis. Involved in the biogenesis and/or repair of oxidatively damaged Fe–S clusters. Expressed in embryos and meristems.	plastid		golgi:25900983;plastid:21531424;plastid:18431481;plastid:18633119;plastid:20061580;plastid:24361574;plastid:24872594												AT1G31180
AT3G11630	Thioredoxin superfamily protein;Encodes a 2-Cys peroxiredoxin (2-Cys PrxA) that contains two catalytic Cys residues.	plastid	unclear:24130194	extracellular:26572690;mitochondrion:23444301;mitochondrion:23444301;nucleus:23396599;plasma membrane:25641898;plasma membrane:22215637;plastid:11826309;plastid:12938931;plastid:14729914;plastid:15028209;plastid:16207701;plastid:16648217;plastid:20423899;plastid:21531424;plastid:23851315;plastid:16923014;plastid:18431481;plastid:18433418;plastid:18633119;plastid:20061580;plastid:21539947;plastid:…												AT1G06290
AT3G20330	PYRIMIDINE B;encodes aspartate carbamoyltransferase catalyzing the second step in the de novo pyrimidine ribonucleotide biosynthesis	plastid		cytosol:21166475;plastid:16207701;plastid:21531424;plastid:18431481;plastid:20061580;plastid:24361574;plastid:24872594												AT2G21640
AT3G20390	endoribonuclease L-PSP family protein;	plastid		extracellular:26572690;mitochondrion:21841088;mitochondrion:27943495;plastid:15028209;plastid:16648217;plastid:20423899;plastid:21531424;plastid:22923678;plastid:23851315;plastid:20061580;plastid:24872594;plastid:18431481;plastid:18433418;plastid:20061580;plastid:24361574;plastid:24872594;plastid:18431481;unclear:16618929												AT3G12800
AT3G23940	dehydratase family;	plastid		extracellular:26572690;plastid:15028209;plastid:16207701;plastid:21531424;plastid:22923678;plastid:23851315;plastid:18431481;plastid:20061580;plastid:21539947;plastid:24361574												AT1G80560
AT3G48730	glutamate-1-semialdehyde 2,1-aminomutase 2;	plastid	cytosol:24130194	golgi:25900983;golgi:25900983;golgi:25900983;golgi:25900983;plastid:12938931;plastid:15028209;plastid:16207701;plastid:20423899;plastid:21531424;plastid:23851315;plastid:25740923;plastid:18431481;plastid:18633119;plastid:20061580;plastid:21539947;plastid:24361574;plastid:24872594;vacuole:25900983												AT3G48170
AT3G54050	high cyclic electron flow 1;Encodes HCEF1 (High Cyclic Electron Flow 1). Mutant phenotype: constitutively elevated electron flow (CEFI).	plastid		mitochondrion:27122571;mitochondrion:27943495;plasma membrane:25641898;plastid:15028209;plastid:16207701;plastid:20423899;plastid:21531424;plastid:23851315;plastid:16923014;plastid:18431481;plastid:18433418;plastid:18633119;plastid:20061580;plastid:21539947;plastid:23549413;plastid:24361574;plastid:24872594												AT4G18360
AT3G54660	glutathione reductase;Encodes glutathione reductase that is most likely localized in the chloroplast.	plastid	mitochondrion:12954611;mitochondrion:23257241;plastid:23257241;plastid:24249834	extracellular:26572690;mitochondrion:12954611;mitochondrion:17137349;mitochondrion:27943495;plastid:15028209;plastid:16207701;plastid:21531424;plastid:18431481;plastid:18433418;plastid:20061580;plastid:21539947;plastid:24361574												AT3G48730
AT3G55010	phosphoribosylformylglycinamidine cyclo-ligase, chloroplast / phosphoribosyl-aminoimidazole synthetase / AIR synthase (PUR5);encoding phosphoribosylformylglycinamidine cyclo-ligase (syn. AIR synthetase)that phosphorylates 5-phosphoribosyl-N-formylglycinamidine (FGAM) to form 5-aminoimidazole ribonucleotide (AIR)	plastid	plastid:in house	extracellular:26572690;mitochondrion:17137349;plastid:21531424;plastid:18431481;plastid:20061580;plastid:24361574												AT4G35090
AT3G55400	methionyl-tRNA synthetase / methionine--tRNA ligase / MetRS (cpMetRS);	plastid	mitochondrion:9724821;plastid:9724821	cytoskeleton:24134884;mitochondrion:14671022;mitochondrion:21841088;mitochondrion:27943495;plastid:21531424;plastid:23851315;plastid:18431481;plastid:20061580;plastid:24361574												AT3G56460
AT3G56090	ferritin 3;Encodes FERRITIN 3, AtFER3. Ferritins are a class of 24-mer multi-meric proteins found in all kingdoms of life. Function as the main iron store in mammals. Evidence suggests that Arabidopsis ferritins are essential to protect cells against oxidative damage, but they do not constitute the major iron pool.	plastid		extracellular:26572690;plasma membrane:19334764;plasma membrane:22318864;plastid:12938931;plastid:20423899;plastid:21531424;plastid:18431481;plastid:20061580												AT3G01910
AT3G57050	cystathionine beta-lyase;Encodes second enzyme in the methionine biosynthetic pathway	plastid		mitochondrion:21841088;mitochondrion:27943495;plastid:18431481;plastid:21531424;plastid:20061580;plastid:24361574												AT2G22250
AT3G57560	N-acetyl-l-glutamate kinase;encodes a N-acetylglutamate kinase, involved in arginine biosynthesis	plastid		extracellular:26572690;plastid:21531424;plastid:18431481;plastid:24361574;plastid:20061580;plastid:24872594												AT4G33030
AT4G00620	Amino acid dehydrogenase family protein;	plastid	plastid:27291711	mitochondrion:27122571;mitochondrion:27943495;plastid:18431481;plastid:24361574;plastid:20061580												AT3G05020
AT4G01900	GLNB1 homolog;encodes a PII protein that may function as part of a signal transduction network involved in perceiving the status of carbon and organic nitrogen. Forms a protein complex with N-acetylglutamate kinase and regulates the kinase activity by relieving the feedback inhibition of the kinase by arginine. Regulates acetyl-CoA carboxylase activity.	plastid		cytosol:21166475;extracellular:26572690;plastid:20423899;plastid:21531424;plastid:18431481;plastid:20061580;plastid:24872594
AT4G03520	Thioredoxin superfamily protein;chloroplast localized thioredoxin, similar to prokaryotic types.	plastid	plastid:12707279	extracellular:26572690;plastid:11826309;plastid:14729914;plastid:15028209;plastid:16207701;plastid:20423899;plastid:18431481;plastid:18633119;plastid:20061580;plastid:21539947;plastid:24361574;plastid:24872594;plastid:18431481
AT4G17040	CLP protease R subunit 4;	plastid	plastid:in house	golgi:25900983;golgi:25900983;golgi:25900983;golgi:25900983;plastid:12938931;plastid:16207701;plastid:20423899;plastid:21531424;plastid:22923678;plastid:20061580;plastid:24872594;plastid:18431481;plastid:18633119;plastid:20061580;plastid:24361574;plastid:24872594;plastid:18431481;vacuole:25900983
AT4G24830	arginosuccinate synthase family;	plastid		mitochondrion:21841088;plastid:15028209;plastid:20423899;plastid:21531424;plastid:22923678;plastid:23851315;plastid:18431481;plastid:18633119;plastid:20061580;plastid:21539947;plastid:24361574;plastid:24872594
AT4G29840	Pyridoxal-5'-phosphate-dependent enzyme family protein;threonine synthase	plastid		cytosol:21166475;golgi:25900983;mitochondrion:21841088;plasma membrane:19334764;plastid:20423899;plastid:21531424;plastid:18431481;plastid:20061580;plastid:24361574;plastid:24872594
AT4G30920	Cytosol aminopeptidase family protein;	plastid		cytosol:21166475;extracellular:18998720;extracellular:26572690;mitochondrion:27943495;plasma membrane:19334764;plastid:18431481;plastid:20423899;plastid:21531424;plastid:20061580;plastid:24361574;plastid:24872594;vacuole:15215502;vacuole:23903016
AT4G31990	aspartate aminotransferase 5;Encodes a plastid-localized aspartate aminotransferase. Does not display any PAT (glutamate/aspartate-prephenate aminotransferase) activity even in the presence of a high concentration of prephenate.	plastid	plastid:12837943;plastid:14754918	extracellular:26572690;mitochondrion:21841088;plastid:12938931;plastid:15028209;plastid:16207701;plastid:20423899;plastid:21531424;plastid:23851315;plastid:16923014;plastid:18431481;plastid:18633119;plastid:20061580;plastid:21539947;plastid:24361574;plastid:24872594
AT4G32520	serine hydroxymethyltransferase 3;Encodes a serine hydroxymethyltransferase SHMT3 located in the plastid.	plastid	plastid:20518745	cytoskeleton:24134884;plastid:18431481;plastid:20423899;plastid:21531424;plastid:20061580;plastid:24361574;plastid:24872594
AT4G33030	sulfoquinovosyldiacylglycerol 1;involved in sulfolipid biosynthesis	plastid		mitochondrion:21841088;plastid:21531424;plastid:23851315;plastid:20061580;plastid:24361574
AT4G34290	SWIB/MDM2 domain superfamily protein;	plastid	plastid:22797472	plastid:26987276;plastid:20061580;plastid:24872594;plastid:20061580;plastid:24872594
AT4G34740	GLN phosphoribosyl pyrophosphate amidotransferase 2;Encodes glutamine 5-phosphoribosylpyrophosphate amidotransferase. Mutants are deficient in leaf, but not cotyledon, plastid and palisade cell development. Mutants exhibit defective chloroplast development under non-low light, suggesting that the defect in chloroplast development is caused by photo-oxidative damage.	plastid		golgi:25900983;golgi:25900983;golgi:25900983;golgi:25900983;plastid:18431481;plastid:20423899;plastid:21531424;plastid:23851315;plastid:20061580;plastid:24361574;plastid:24872594;vacuole:25900983
AT5G10920	L-Aspartase-like family protein;	plastid		plastid:16207701;plastid:18431481;plastid:20423899;plastid:21531424;plastid:20061580;plastid:24361574
AT5G35360	acetyl Co-enzyme a carboxylase biotin carboxylase subunit;Encodes biotin carboxylase subunit (CAC2).	plastid		golgi:25900983;mitochondrion:23444301;mitochondrion:27943495;mitochondrion:23444301;plastid:12938931;plastid:16207701;plastid:20423899;plastid:21531424;plastid:23851315;plastid:26987276;plastid:18431481;plastid:20061580;plastid:24361574;plastid:24872594
AT5G45390	CLP protease P4;One of several nuclear-encoded ClpPs (caseinolytic protease). Contains a highly conserved catalytic triad of Ser-type proteases (Ser-His-Asp). The name reflects nomenclature described in Adam et. al (2001).	plastid	plastid:in house	golgi:25900983;golgi:25900983;plastid:11278690;plastid:12938931;plastid:15028209;plastid:16207701;plastid:16648217;plastid:20423899;plastid:21531424;plastid:23851315;plastid:20061580;plastid:24872594;plastid:18431481;plastid:18633119;plastid:20061580;plastid:24361574;plastid:24872594;plastid:18431481;plastid:23667806
AT5G52520	Class II aaRS and biotin synthetases superfamily protein;	plastid	mitochondrion:16251277;mitochondrion:19733576;plastid:16251277;plastid:19733576	golgi:25900983;mitochondrion:21841088;mitochondrion:27943495;plasma membrane:19334764;plastid:16207701;plastid:21531424;plastid:18431481;plastid:20061580;plastid:24361574;plastid:24872594
AT5G54810	tryptophan synthase beta-subunit 1;A.thaliana tryptophan synthase beta subunit (trpB)	plastid		plasma membrane:22923678;plastid:18431481;plastid:21531424;plastid:23851315;plastid:18633119;plastid:20061580;plastid:24361574
AT5G58330	lactate/malate dehydrogenase family protein;	plastid		golgi:25900983;mitochondrion:14671022;plastid:12938931;plastid:16207701;plastid:16648217;plastid:20423899;plastid:21531424;plastid:23851315;plastid:18431481;plastid:18633119;plastid:20061580;plastid:24361574;vacuole:25900983
AT5G63570	glutamate-1-semialdehyde-2,1-aminomutase;Encodes a protein with homology to glutamate-1-semialdehyde 2,1-aminomutase catalyzing the conversion of glutamate-1-semialdehyde (GSA) into 5-amino levulinate. The expression of this gene was demonstrated to be light-induced.	plastid		mitochondrion:27943495;plastid:12938931;plastid:15028209;plastid:16207701;plastid:20423899;plastid:21531424;plastid:23851315;plastid:18431481;plastid:18633119;plastid:20061580;plastid:21539947;plastid:24361574;plastid:24872594
ATCG00490	ribulose-bisphosphate carboxylases;large subunit of RUBISCO. Protein is tyrosine-phosphorylated and its phosphorylation state is modulated in response to ABA in Arabidopsis thaliana seeds.	plastid		extracellular:26572690;golgi:25900983;golgi:25900983;golgi:25900983;golgi:25900983;golgi:25900983;mitochondrion:24727099;mitochondrion:27943495;nucleus:24012629;nucleus:27177187;nucleus:23396599;plasma membrane:19334764;plasma membrane:22215637;plasma membrane:22318864;plasma membrane:26781341;plastid:11826309;plastid:14729914;plastid:15028209;plastid:15322131;plastid:16207701;plastid:16648217;pl…
AT1G65930	cytosolic NADP+-dependent isocitrate dehydrogenase;Encodes a NADP+-isocitrate dehydrogenase that is believed to function in the cytosol. It appears to contribute to NADPH production under oxidative stress, and thereby to participate in redox signalling linked to defense responses.	cytosol		cytosol:21166475;extracellular:26572690;golgi:25900983;golgi:25900983;golgi:25900983;golgi:25900983;plasma membrane:25641898;plasma membrane:17644812;plasma membrane:19334764;plasma membrane:22215637;plasma membrane:22318864;plasma membrane:26781341;plastid:20061580;plastid:24361574;vacuole:23903016
AT1G77120	alcohol dehydrogenase 1;Catalyzes the reduction of acetaldehyde using NADH as reductant. Requires zinc for activity. Dimer. Anaerobic response polypeptide (ANP). Fermentation. The protein undergoes thiolation following treatment with the oxidant tert-butylhydroperoxide.	cytosol	cytosol:24204370;nucleus:24204370;unclear:18931141	cytosol:21166475;extracellular:26572690;plasma membrane:17317660;plasma membrane:17644812;plasma membrane:19334764;plasma membrane:21433285;vacuole:15215502;vacuole:23903016
AT1G79500	Aldolase-type TIM barrel family protein;Encodes a protein with 3-deoxy-8-phosphooctulonate synthase (KDOP synthase) activity which is involved in the biosynthesis of KDO, a component of cell wall rhamnogalacturonan II.	cytosol		cytosol:21166475;extracellular:26572690
AT2G24200	Cytosol aminopeptidase family protein;	cytosol		cytosol:21166475;extracellular:18998720;extracellular:26572690;mitochondrion:21841088;mitochondrion:27122571;plasma membrane:25641898;plasma membrane:15574830;plasma membrane:19334764;plasma membrane:21433285;plasma membrane:22215637;plasma membrane:26781341;plastid:20061580;plastid:24361574;vacuole:15215502;vacuole:23903016
AT3G52990	Pyruvate kinase family protein;	cytosol		cytosol:21166475;extracellular:26572690;golgi:25900983;golgi:25900983;golgi:25900983;golgi:25900983;golgi:25900983;mitochondrion:27122571;plasma membrane:19334764;plasma membrane:21433285;plasma membrane:26781341;vacuole:25900983
AT4G09320	Nucleoside diphosphate kinase family protein;nucleoside diphosphate kinase type 1 (NDPK1) gene, complete	cytosol	cytosol:19329564;nucleus:19329564;peroxisome:19329564	cytosol:21166475;extracellular:26572690;golgi:25900983;golgi:25900983;golgi:25900983;mitochondrion:27943495;peroxisome:19329564;peroxisome:24130194;plasma membrane:25641898;plasma membrane:15574830;plasma membrane:17644812;plasma membrane:19334764;plasma membrane:22215637;plasma membrane:26781341;plastid:18431481;plastid:20061580;plastid:24361574;vacuole:17151019
AT4G13940	S-adenosyl-L-homocysteine hydrolase;Encodes a S-adenosyl-L-homocysteine hydrolase required for DNA methylation-dependent gene silencing.	cytosol		cytosol:21166475;extracellular:26572690;extracellular:25852701;golgi:25900983;golgi:25900983;golgi:25900983;golgi:25900983;golgi:25900983;mitochondrion:27943495;nucleus:24012629;nucleus:23396599;plasma membrane:25641898;plasma membrane:17644812;plasma membrane:19334764;plasma membrane:21433285;plasma membrane:22215637;plasma membrane:22318864;plasma membrane:26781341;plastid:20061580;plastid:2436…
AT4G14880	O-acetylserine (thiol) lyase (OAS-TL) isoform A1;Encodes a cytosolic isoform of cytosolic O-acetylserine(thiol)lyase, a key enzyme in cysteine biosynthesis and for the fixation of inorganic sulfide. It catalyzes the formation of cysteine from O-acetylserine and inorganic sulfide. Gene expression is predominant in the root cortex and the xylem parenchyma. Gene expression is induced in leave, stems…	cytosol		cytosol:21166475;extracellular:26572690;golgi:25900983;golgi:25900983;golgi:25900983;golgi:25900983;mitochondrion:27122571;nucleus:14617066;peroxisome:17951448;peroxisome:19329564;plasma membrane:25641898;plasma membrane:15574830;plasma membrane:17644812;plasma membrane:22215637;plasma membrane:26781341;plastid:18431481;plastid:20423899;plastid:20061580;plastid:24361574;vacuole:17151019;vacuole:2…
AT5G11670	NADP-malic enzyme 2;The malic enzyme (EC 1.1.1.40) encoded by AtNADP-ME2 is presumably a cytosolic enzyme involved in malate metabolism and possibly assisting the oxidative pentose phosphate pathway. AtNADP-ME2 counts for the major part of NADP-ME activity in mature tissues of Arabidopsis.	cytosol		cytosol:21166475;extracellular:26572690;mitochondrion:27122571;plasma membrane:25641898;plasma membrane:17317660;plasma membrane:17644812;plasma membrane:19334764;plasma membrane:21433285;plasma membrane:22215637;plasma membrane:26781341;plastid:15028209;plastid:24361574;vacuole:17151019;vacuole:23903016
AT5G17330	glutamate decarboxylase;Encodes one of two isoforms of glutamate decarboxylase.	cytosol		cytosol:21166475;extracellular:26572690;vacuole:23903016
AT5G49810	methionine S-methyltransferase;Arabidopsis thaliana methionine S-methyltransferase, an enzyme that catalyzes S -methylmethionine formation.	cytosol		cytosol:21166475;extracellular:26572690;golgi:25900983
AT2G33590	NAD(P)-binding Rossmann-fold superfamily protein;	cytosol,golgi
AT2G21580	Ribosomal protein S25 family protein;	cytosol,nucleus		cytosol:15734919;cytosol:22522809;extracellular:26572690;golgi:25900983;golgi:25900983;golgi:25900983;golgi:25900983;golgi:25900983;nucleus:23396599;plasma membrane:25641898;plasma membrane:19334764;plasma membrane:22215637;plasma membrane:22318864;plasma membrane:26781341;vacuole:17151019;vacuole:25900983
AT3G04120	glyceraldehyde-3-phosphate dehydrogenase C subunit 1;encodes cytosolic GADPH (C subunit) involved in the glycolytic pathway but also interacts with H2O2 potentially placing it in a signalling cascade induced by ROS.	cytosol,nucleus	cytoskeleton:23316205;cytosol:10737809;cytosol:23316205;cytosol:25918875;cytosol:28444344;mitochondrion:23316205;nucleus:25918875;nucleus:28444344;plasma membrane:25918875	cytosol:21166475;cytosol:22522809;extracellular:15157177;extracellular:26572690;golgi:25900983;golgi:25900983;golgi:25900983;mitochondrion:12492832;mitochondrion:14671022;mitochondrion:24727099;mitochondrion:27943495;nucleus:14617066;nucleus:24012629;plasma membrane:17317660;plasma membrane:17644812;plasma membrane:22215637;plasma membrane:22318864;plasma membrane:23323832;plasma membrane:2678134…
AT5G15650	reversibly glycosylated polypeptide 2;Reversibly Glycosylated Polypeptide-2. Constitutive expression in tobacco impairs plant development and virus spread.	golgi	cytosol:21478444;golgi:15879561;golgi:21478444;plasma membrane:15879561	cytosol:15734919;cytosol:25587034;extracellular:18998720;extracellular:26572690;extracellular:28003327;golgi:25900983;golgi:25900983;golgi:25900983;golgi:25900983;mitochondrion:27122571;plasma membrane:25641898;plasma membrane:19334764;vacuole:15215502;vacuole:23903016
AT1G51650	ATP synthase epsilon chain, mitochondrial;	mitochondrion		mitochondrion:12681508;mitochondrion:14671022;mitochondrion:15276431;mitochondrion:18189341;mitochondrion:21841088;mitochondrion:27943495
AT2G17130	isocitrate dehydrogenase subunit 2;Encodes a regulatory subunit of the mitochondrially-localized NAD+- dependent isocitrate dehydrogenase.	mitochondrion		extracellular:26572690;mitochondrion:14671022;mitochondrion:21472856;mitochondrion:23444301;mitochondrion:27943495;mitochondrion:21896887;mitochondrion:23444301
AT2G21870	copper ion binding;cobalt ion binding;zinc ion binding;	mitochondrion	nucleus:15496452;unclear:15496452	golgi:25900983;golgi:25900983;golgi:25900983;golgi:25900983;mitochondrion:11743114;mitochondrion:11743115;mitochondrion:11870776;mitochondrion:12492832;mitochondrion:12681508;mitochondrion:14671022;mitochondrion:15276431;mitochondrion:18189341;mitochondrion:21472856;mitochondrion:21841088;mitochondrion:22923678;mitochondrion:24727099;mitochondrion:27943495;mitochondrion:21896887;nucleus:15496452;…
AT3G02090	Insulinase (Peptidase family M16) protein;	mitochondrion	unclear:15496452	extracellular:26572690;golgi:25900983;golgi:25900983;golgi:25900983;golgi:25900983;golgi:25900983;mitochondrion:11743115;mitochondrion:11870776;mitochondrion:14671022;mitochondrion:14730085;mitochondrion:15276431;mitochondrion:18189341;mitochondrion:21472856;mitochondrion:21841088;mitochondrion:22923678;mitochondrion:23444301;mitochondrion:27122571;mitochondrion:27943495;mitochondrion:21896887;nu…
AT3G15660	glutaredoxin 4;	mitochondrion	mitochondrion:12954611;mitochondrion:26672074	mitochondrion:12606038;mitochondrion:12954611;mitochondrion:21472856;mitochondrion:21841088;mitochondrion:22923678;mitochondrion:23444301;mitochondrion:26672074;mitochondrion:27943495;mitochondrion:23444301
AT3G27240	Cytochrome C1 family;	mitochondrion		golgi:25900983;golgi:25900983;golgi:25900983;mitochondrion:11870776;mitochondrion:14671022;mitochondrion:15276431;mitochondrion:18189341;mitochondrion:21472856;mitochondrion:21841088;mitochondrion:22923678;mitochondrion:27122571;mitochondrion:27943495;mitochondrion:21896887;plasma membrane:17317660;plasma membrane:19334764;plasma membrane:21433285;vacuole:15215502;vacuole:17151019;vacuole:25900983
AT3G27890	NADPH:quinone oxidoreductase;Encodes NAD(P)H:quinone reductase which is an FMN binding protein that catalyzes the reduction of quinone substrates to hydroquinones.The enzyme activity was confirmed by in vitro assay.	mitochondrion		cytosol:21166475;extracellular:26572690;mitochondrion:21841088;mitochondrion:27943495;plastid:18431481;plastid:20423899;plastid:18633119;plastid:20061580;plastid:24361574;plastid:24872594
AT4G13360	ATP-dependent caseinolytic (Clp) protease/crotonase family protein;	mitochondrion		cytosol:21166475;mitochondrion:24727099;mitochondrion:27943495;plastid:20423899
AT4G32470	Cytochrome bd ubiquinol oxidase, 14kDa subunit;	mitochondrion		golgi:25900983;golgi:25900983;golgi:25900983;mitochondrion:11743115;mitochondrion:14671022;mitochondrion:15276431;mitochondrion:18189341;mitochondrion:21472856;mitochondrion:21841088;mitochondrion:22923678;mitochondrion:27943495;mitochondrion:21896887;plasma membrane:19334764;plasma membrane:22215637;unclear:16618929;vacuole:17151019;vacuole:25900983
AT5G15090	voltage dependent anion channel 3;Encodes a voltage-dependent anion channel (VDAC: AT3G01280/VDAC1, AT5G67500/VDAC2, AT5G15090/VDAC3, AT5G57490/VDAC4, AT5G15090/VDAC5). VDACs are reported to be porin-type, beta-barrel diffusion pores. They are prominently localized in the outer mitochondrial membrane and are involved in metabolite exchange between the organelle and the cytosol.	mitochondrion	mitochondrion:21705391;plasma membrane:15060130;unclear:15496452	golgi:25900983;golgi:25900983;golgi:25900983;golgi:25900983;golgi:25900983;mitochondrion:11743114;mitochondrion:11743115;mitochondrion:12492832;mitochondrion:14671022;mitochondrion:15276431;mitochondrion:18385124;mitochondrion:21296373;mitochondrion:21472856;mitochondrion:21841088;mitochondrion:22923678;mitochondrion:24727099;mitochondrion:27122571;mitochondrion:27943495;mitochondrion:21896887;nu…
AT5G25940	early nodulin-related;	mitochondrion		mitochondrion:14671022;mitochondrion:15276431;mitochondrion:21472856;mitochondrion:21841088;mitochondrion:22923678;mitochondrion:27943495;plastid:20061580
AT5G40770	prohibitin 3;prohibitin 3	mitochondrion	cytosol:17525078;mitochondrion:17883375;nucleus:15496452;nucleus:17525078;unclear:15496452	golgi:25900983;golgi:25900983;golgi:25900983;golgi:25900983;golgi:25900983;mitochondrion:11743115;mitochondrion:12970493;mitochondrion:14671022;mitochondrion:15276431;mitochondrion:18189341;mitochondrion:21472856;mitochondrion:21841088;mitochondrion:22923678;mitochondrion:24727099;mitochondrion:27122571;mitochondrion:27943495;nucleus:15496452;plasma membrane:15060130;plasma membrane:19334764;vacu…
AT5G47030	ATPase, F1 complex, delta/epsilon subunit;Encodes the mitochondrial ATP synthase subunit delta.	mitochondrion		mitochondrion:11743114;mitochondrion:11870776;mitochondrion:12681508;mitochondrion:14671022;mitochondrion:15276431;mitochondrion:18189341;mitochondrion:21472856;mitochondrion:21841088;mitochondrion:22923678;mitochondrion:23444301;mitochondrion:27943495
AT3G46940	DUTP-PYROPHOSPHATASE-LIKE 1;	nucleus		cytosol:21166475;plastid:24872594
AT5G39570	;	nucleus		extracellular:28155257;mitochondrion:27943495;nucleus:27177187
AT1G08110	lactoylglutathione lyase family protein / glyoxalase I family protein;	peroxisome		cytosol:21166475;extracellular:18998720;extracellular:26572690;mitochondrion:27943495;plastid:21531424;plastid:20061580;plastid:24361574
AT5G42890	sterol carrier protein 2;	peroxisome	peroxisome:15456765	extracellular:26572690;peroxisome:17951448;peroxisome:18931141;peroxisome:19329564;peroxisome:24130194
AT1G03475	Coproporphyrinogen III oxidase;Encodes coproporphyrinogen III oxidase, a key enzyme in the biosynthetic pathway of chlorophyll and heme, a tetrapyrrole pathway. Mutants express cytological and molecular markers associated with the defense responses, usually activated by pathogen infection.	plastid	plastid:11733507;plastid:ISSN 0981-9428	mitochondrion:27943495;plastid:15028209;plastid:16207701;plastid:20423899;plastid:21531424;plastid:18431481;plastid:18633119;plastid:20061580;plastid:21539947;plastid:24361574;plastid:24872594
AT1G08490	chloroplastic NIFS-like cysteine desulfurase;Chloroplastic NifS-like protein that can catalyze the conversion of cysteine into alanine and elemental sulfur (S(0)) and of selenocysteine into alanine and elemental Se (Se(0)). Overexpression enhances selenium tolerance and accumulation.	plastid	plastid:12033984	plastid:23851315;plastid:18431481;plastid:20061580;plastid:24361574
AT1G09130	ATP-dependent caseinolytic (Clp) protease/crotonase family protein;	plastid	plastid:19036033	golgi:25900983;golgi:25900983;golgi:25900983;golgi:25900983;mitochondrion:14671022;plastid:11278690;plastid:12938931;plastid:16207701;plastid:16648217;plastid:21531424;plastid:20061580;plastid:18431481;plastid:18633119;plastid:20061580;plastid:21539947;plastid:24361574;plastid:18431481
AT1G15060	Uncharacterised conserved protein UCP031088, alpha/beta hydrolase;	plastid		golgi:25900983;mitochondrion:21841088;plastid:18431481
AT1G17160	pfkB-like carbohydrate kinase family protein;	plastid		plastid:16207701;plastid:18431481;plastid:20423899;plastid:21531424;plastid:20061580;plastid:24361574
AT1G49970	CLP protease proteolytic subunit 1;Encodes a ClpP-related sequence. Though similar to ClpP proteins, this does not contains the highly conserved catalytic triad of Ser-type proteases (Ser-His-Asp). The name reflects nomenclature described in Adam et. al (2001).	plastid	plastid:in house	golgi:25900983;plastid:11278690;plastid:16207701;plastid:20423899;plastid:21531424;plastid:23851315;plastid:20061580;plastid:24872594;plastid:18431481;plastid:20061580;plastid:24361574;plastid:24872594;plastid:18431481
AT1G54630	acyl carrier protein 3;encodes an acyl carrier protein expressed in leaves, roots, and dry seeds. Gene expression is not regulated by light.	plastid		plastid:18431481;plastid:21531424;plastid:20061580
AT1G70570	anthranilate phosphoribosyltransferase, putative;	plastid		extracellular:26572690;plastid:18431481;plastid:21531424;plastid:20061580;plastid:24361574
AT1G72810	Pyridoxal-5'-phosphate-dependent enzyme family protein;	plastid		golgi:25900983;plastid:21531424;plastid:20061580;plastid:23549413;plastid:24361574
AT2G37690	phosphoribosylaminoimidazole carboxylase, putative / AIR carboxylase, putative;	plastid		plasma membrane:19334764;plastid:18431481;plastid:20423899;plastid:21531424;plastid:20061580;plastid:24361574
AT2G41220	glutamate synthase 2;Encodes a gene whose sequence is similar to ferredoxin dependent glutamate synthase (Fd-GOGAT). Expression is most abundant in root.	plastid		extracellular:26572690;mitochondrion:27943495;plastid:12938931;plastid:15028209;plastid:20423899;plastid:22923678;plastid:18431481;plastid:24361574
AT2G44650	chloroplast chaperonin 10;Encodes a chloroplast-localized chaperonin 10 whose mRNA is expressed in leaves and stems but not roots.	plastid		plastid:16207701;plastid:20423899;plastid:21531424;plastid:20061580;plastid:18431481;plastid:20061580;plastid:24361574
AT2G45440	dihydrodipicolinate synthase;Encodes a protein that likely has dihydropicolinate synthase activity based on its mutant phenotype of decreased lysine levels and increased aspartate levels. The mutant also has increased levels of threonine. The enzyme is predicted to localize to the chloroplast.	plastid		plastid:21531424;plastid:20061580;plastid:24361574
AT3G13470	TCP-1/cpn60 chaperonin family protein;	plastid		golgi:25900983;golgi:25900983;golgi:25900983;mitochondrion:14671022;mitochondrion:21841088;mitochondrion:27943495;nucleus:14617066;nucleus:15496452;plasma membrane:19334764;plasma membrane:21433285;plasma membrane:22318864;plastid:12938931;plastid:16207701;plastid:20423899;plastid:21531424;plastid:23549413;plastid:23851315;plastid:26987276;plastid:20061580;plastid:24872594;plastid:18431481;plasti…
AT3G21140	Pyridoxamine 5'-phosphate oxidase family protein;	plastid	endoplasmic reticulum:21908688	plastid:21531424;plastid:24872594
AT3G53900	uracil phosphoribosyltransferase;Encodes UPP, a plastidial uracil phosphoribosyltransferase (UPRT) involved in uracil salvage. Loss-of-function mutation causes dramatic growth retardation, a pale-green to albino phenotype, abnormal root morphology and chloroplastic disorders.	plastid		cytosol:21166475;golgi:25900983;plastid:21531424;plastid:18431481;plastid:20061580;plastid:24361574
AT3G57610	adenylosuccinate synthase;encoding adenylosuccinate synthetase (AdSS), the enzyme involved in the first step of the formation of the purine nucleotide AMP (conversion of IMP to adenylo-succinate)	plastid		mitochondrion:27943495;plastid:15028209;plastid:16207701;plastid:20423899;plastid:21531424;plastid:22923678;plastid:23851315;plastid:18431481;plastid:18633119;plastid:20061580;plastid:24361574;plastid:24872594
AT4G04770	ATP binding cassette protein 1;Encodes an iron-stimulated ATPase. A member of the NAP subfamily of ABC transporters. Involved in Fe-S cluster assembly. Similar to SufB. Involved in the regulation of iron homeostasis. Able to form homodimers. Interacts with AtNAP7 inside the chloroplast.	plastid	plastid:11156608	golgi:25900983;golgi:25900983;golgi:25900983;plastid:18431481;plastid:21531424;plastid:20061580;plastid:24361574;vacuole:25900983
AT4G19880	Glutathione S-transferase family protein;	plastid		cytosol:21166475;mitochondrion:21841088;mitochondrion:27943495;plastid:24361574
AT4G25370	Double Clp-N motif protein;	plastid	plastid:in house	extracellular:26572690;plastid:11826309;plastid:12938931;plastid:14729914;plastid:15028209;plastid:16207701;plastid:20423899;plastid:21531424;plastid:20061580;plastid:18431481;plastid:18633119;plastid:20061580;plastid:24361574;plastid:18431481
AT4G33680	Pyridoxal phosphate (PLP)-dependent transferases superfamily protein;Involved in disease resistance against Pseudomonas syringae. mutants have elevated SA levels, a low level of spontaneous cell death, callose deposition, and enlarged cells in leaves. genetically maps on chr 4 between L23H3 and nga1139.	plastid		extracellular:26572690;mitochondrion:27122571;plasma membrane:19334764;plastid:16207701;plastid:20423899;plastid:21531424;plastid:23851315;plastid:18431481;plastid:18633119;plastid:20061580;plastid:24361574;plastid:24872594
AT5G12040	Nitrilase/cyanide hydratase and apolipoprotein N-acyltransferase family protein;	plastid		cytosol:21166475;extracellular:26572690;mitochondrion:21841088;plastid:20423899;plastid:18431481;plastid:20061580;plastid:24361574
AT5G14260	Rubisco methyltransferase family protein;	plastid		golgi:25900983;golgi:25900983;golgi:25900983;golgi:25900983;plastid:18431481;plastid:20423899;plastid:21531424;plastid:23851315;plastid:20061580;plastid:24361574;plastid:24872594;vacuole:25900983
AT5G16710	dehydroascorbate reductase 1;The protein undergoes thiolation following treatment with the oxidant tert-butylhydroperoxide.	plastid	plastid:19174456;plastid:26927949;plastid:28381499	plastid:12938931;plastid:15028209;plastid:16207701;plastid:20423899;plastid:21531424;plastid:23851315;plastid:18431481;plastid:18633119;plastid:20061580;plastid:24361574;plastid:24872594
AT5G17560	BolA-like family protein;	plastid	mitochondrion:24203231;plastid:24203231	plastid:20423899;plastid:18431481;plastid:20061580;plastid:24361574
AT5G20720	chaperonin 20;Encodes a chloroplast co-chaperonin with similarity to CPN21 from spinach, E.coli GroES.	plastid	peroxisome:10737809;plastid:19036033	extracellular:26572690;golgi:25900983;mitochondrion:18385124;mitochondrion:21296373;mitochondrion:21841088;mitochondrion:27943495;plastid:11826309;plastid:12938931;plastid:14729914;plastid:15028209;plastid:16207701;plastid:20423899;plastid:21531424;plastid:22923678;plastid:23851315;plastid:20061580;plastid:18431481;plastid:18633119;plastid:20061580;plastid:21539947;plastid:24361574
AT5G46290	3-ketoacyl-acyl carrier protein synthase I;3-ketoacyl-acyl carrier protein synthase I (KAS I) mRNA,	plastid	unclear:24130194	extracellular:26572690;golgi:25900983;golgi:25900983;golgi:25900983;golgi:25900983;golgi:25900983;nucleus:27177187;plasma membrane:19334764;plasma membrane:22215637;plastid:12938931;plastid:16207701;plastid:20423899;plastid:21531424;plastid:22923678;plastid:23851315;plastid:18431481;plastid:18633119;plastid:20061580;plastid:21539947;plastid:24361574;vacuole:25900983
AT5G54770	thiazole biosynthetic enzyme, chloroplast (ARA6) (THI1) (THI4);Encodes a thiamine biosynthetic gene that has a dual function in thiamine biosynthesis and mitochondrial DNA damage tolerance. It appears to be involved in producing the thiazole portion of thiamine (vitamin B1). A crystal structure of the protein reveals that it forms a 2-ring homo-octamer.	plastid	mitochondrion:12482914;plastid:12482914	nucleus:27177187;plastid:12938931;plastid:16207701;plastid:16648217;plastid:20423899;plastid:21531424;plastid:23851315;plastid:16923014;plastid:18431481;plastid:18633119;plastid:20061580;plastid:24361574;plastid:24872594
AT5G56500	TCP-1/cpn60 chaperonin family protein;	plastid		cytosol:21166475;extracellular:26572690;mitochondrion:14671022;plasma membrane:19334764;plastid:15028209;plastid:16207701;plastid:21531424;plastid:24361574
AT5G57850	D-aminoacid aminotransferase-like PLP-dependent enzymes superfamily protein;	plastid	plastid:15500462	plastid:20423899;plastid:21531424;plastid:23851315;plastid:18431481;plastid:20061580;plastid:24361574
AT5G63890	histidinol dehydrogenase;Encodes histidinol dehydrogenase. Up-regulated in response to UV-B.	plastid		extracellular:26572690;mitochondrion:21841088;plastid:20423899;plastid:21531424;plastid:23851315;plastid:20061580;plastid:24361574
AT5G66090	;	plastid		extracellular:26572690;plastid:16207701;plastid:21531424;plastid:18431481;plastid:20061580;plastid:24361574

## Sheet: Sup Tab 4B 
Supplemental Table S4B: Proteins upregulated in the cytosol after HS that were not downregulated in the mitochondria following the heat shock.
Proteins that were not upreguated in the cytosolic fraction when HS was performed in presence of LaCl3 are highlighted in green (138 proteins).							Summary
Examples of proteins previously associated with plant PCD and stress responses are highlighted in yellow (66 proteins).							Location	Count
							Cytosol	211
Protein Properties		Location Consensus	Location Experiments		FC 0.05		ER	1
Gene	Description	Location SUBAcon	Location GFP	Location Mass Spec	Cytsol: Ct vs HS		Extracellular	32
AT1G15930.1	Ribosomal protein L7Ae/L30e/S12e/Gadd45 family protein;	cytosol		cytosol:21166475;cytosol:15734919;cytosol:15821981;cytosol:22522809;extracellular:26572690;nucleus:23396599;plasma membrane:25641898;plasma membrane:22215637	0.872416		Golgi	5
AT1G17890.1	NAD(P)-binding Rossmann-fold superfamily protein;	cytosol			1.39008		Mitochondrion	10
AT1G18080.1	Transducin/WD40 repeat-like superfamily protein;Encodes the Arabidopsis thaliana homolog of the tobacco WD-40 repeat ArcA gene.	cytosol		cytosol:15734919;cytosol:21166475;cytosol:22522809;extracellular:26572690;golgi:25900983;nucleus:24012629;nucleus:27177187;nucleus:23396599;plasma membrane:25641898;plasma membrane:15574830;plasma membrane:19334764;plasma membrane:22215637;plasma membrane:26781341;plastid:18431481;plastid:20423899	2.22742		Nucleus	48
AT1G18540.1	Ribosomal protein L6 family protein;	cytosol		cytosol:17934214;cytosol:21166475;cytosol:15821981;cytosol:22522809;endoplasmic reticulum:16618929;endoplasmic reticulum:22923678;extracellular:26572690;golgi:25900983;golgi:25900983;golgi:25900983;golgi:25900983;golgi:25900983;nucleus:27177187;nucleus:23396599;plasma membrane:25641898;plasma membrane:17317660;plasma membrane:19334764;plasma membrane:26781341;plastid:15028209;vacuole:23903016;vac…	1.8947		Peroxisome	9
AT1G29880.1	glycyl-tRNA synthetase / glycine--tRNA ligase;	cytosol	mitochondrion:11278923	cytosol:21166475;extracellular:26572690;golgi:22923678;golgi:25900983;golgi:25900983;golgi:25900983;golgi:25900983;golgi:25900983;mitochondrion:27943495;plasma membrane:25641898;plasma membrane:19334764;plasma membrane:22215637;plasma membrane:26781341	1.67524		Plasmamembrane	14
AT1G35160.1	GF14 protein phi chain;GF14 protein phi chain member of 14-3-3 protein family. This protein is reported to interact with the BZR1 transcription factor involved in brassinosteroid signaling and may affect the nucleocytoplasmic shuttling of BZR1	cytosol	cytoskeleton:15659648;cytosol:15659648;nucleus:15659648	cytosol:21166475;extracellular:26572690;golgi:22430844;nucleus:24012629;plasma membrane:25641898;plasma membrane:17317660;plasma membrane:19334764;plasma membrane:20843791;plasma membrane:22215637;plasma membrane:22318864;plasma membrane:26781341;plastid:24361574;vacuole:23903016	0.909661		Plastid	71
AT1G44170.1	aldehyde dehydrogenase 3H1;Encodes a protein similar to the aldehyde dehydrogenase cp-ADH from C.plantagineum. Constitutively expressed at low levels.	cytosol		endoplasmic reticulum:16618929;endoplasmic reticulum:22923678;golgi:22430844;golgi:25900983;golgi:25900983;mitochondrion:27943495;mitochondrion:21896887;plasma membrane:25641898;plasma membrane:19334764;plasma membrane:22215637;plasma membrane:23323832;plasma membrane:26781341;vacuole:15215502;vacuole:23903016;vacuole:25900983	0.80945		Vacuole	13
AT1G53310.1	phosphoenolpyruvate carboxylase 1;Encodes one of four Arabidopsis phosphoenolpyruvate carboxylase proteins.	cytosol		cytosol:21166475;extracellular:26572690;golgi:25900983;mitochondrion:27122571;mitochondrion:27943495;plasma membrane:19334764;plasma membrane:21433285;plasma membrane:22215637;plasma membrane:26781341;vacuole:23903016	1.34681		Multiple	28
AT1G54100.1	aldehyde dehydrogenase 7B4;Aldehyde dehydrogenase	cytosol	cytosol:17080931	cytosol:21166475;extracellular:26572690	0.612456		Total	422
AT1G65960.1	glutamate decarboxylase 2;glutamate decarboxylase (GAD2)	cytosol		extracellular:26572690;golgi:25900983;golgi:25900983;golgi:25900983;golgi:25900983;golgi:25900983;plasma membrane:25641898;plasma membrane:15574830;plasma membrane:19334764;plasma membrane:22215637;plastid:23549413;plastid:24361574	0.682539
AT1G74050.1	Ribosomal protein L6 family protein;	cytosol		cytoskeleton:24134884;cytosol:17934214;cytosol:21166475;cytosol:22522809;extracellular:26572690;golgi:25900983;golgi:25900983;golgi:25900983;golgi:25900983;golgi:25900983;nucleus:23396599;plasma membrane:25641898;plasma membrane:17317660;plasma membrane:19334764;plasma membrane:22215637;plasma membrane:26781341;vacuole:23903016;vacuole:25900983	0.870463
AT1G74920.1	aldehyde dehydrogenase 10A8;Arabidopsis thaliana similar to betaine aldehyde dehydrogenase	cytosol	plastid:21053011	cytosol:21166475;extracellular:26572690;plasma membrane:22215637;plasma membrane:26781341	1.03625
AT1G76860.1	Small nuclear ribonucleoprotein family protein;	cytosol	cytosol:23221597;nucleus:23221597	extracellular:26572690;nucleus:27177187	1.17531
AT2G09990.1	Ribosomal protein S5 domain 2-like superfamily protein;	cytosol		cytosol:17934214;cytosol:21166475;cytosol:15734919;cytosol:15821981;cytosol:22522809;extracellular:26572690;golgi:25900983;golgi:25900983;nucleus:23396599;plasma membrane:25641898;plasma membrane:19334764;plasma membrane:26781341;plastid:15028209;vacuole:23903016	2.18649
AT2G19730.1	Ribosomal L28e protein family;	cytosol		cytosol:17934214;cytosol:15821981;cytosol:22522809;extracellular:26572690;golgi:25900983;golgi:25900983;golgi:25900983;golgi:25900983;golgi:25900983;plasma membrane:25641898;plasma membrane:17317660;plasma membrane:19334764;plasma membrane:22215637;plasma membrane:22318864;plasma membrane:26781341;vacuole:23903016;vacuole:25900983	1.88991
AT2G25355.1	PNAS-3 related;	cytosol			0.853872
AT2G27150.1	abscisic aldehyde oxidase 3;Encodes the aldehyde oxidase delta isoform catalyzing the final step in abscisic acid biosynthesis.	cytosol	cytosol:18060348	cytosol:21166475	0.697209
AT2G30410.1	tubulin folding cofactor A (KIESEL);mutant has embryo defect; enlarged embryo cells and endosperm nuclei; Tubulin Folding Cofactor A	cytosol		cytosol:21166475;extracellular:26572690	1.13771
AT2G35840.1	Sucrose-6F-phosphate phosphohydrolase family protein;	cytosol	unclear:15610358	cytosol:21166475;golgi:25900983;golgi:25900983;nucleus:27177187;plasma membrane:25641898	1.06759
AT2G42590.1	general regulatory factor 9;14-3-3 gene. Binds calcium and displays induced structural changes.	cytosol	cytosol:15610358;cytosol:19329564;nucleus:15610358;plasma membrane:19329564	cytosol:21166475;extracellular:26572690;golgi:25900983;peroxisome:19329564;plasma membrane:25641898;plasma membrane:17644812;plasma membrane:22215637;plasma membrane:26781341;plastid:24361574;vacuole:23903016;vacuole:25900983	1.36113
AT2G44060.1	Late embryogenesis abundant protein, group 2;	cytosol		cytosol:21166475;extracellular:26572690;golgi:22430844;golgi:25900983;golgi:25900983;golgi:25900983;golgi:25900983;golgi:25900983;plasma membrane:25641898;plasma membrane:17317660;plasma membrane:17644812;plasma membrane:19334764;plasma membrane:22215637;plasma membrane:26781341;plastid:24361574;vacuole:25900983	0.961941
AT3G01590.1	Galactose mutarotase-like superfamily protein;	cytosol		extracellular:26572690	1.68598
AT3G02560.1	Ribosomal protein S7e family protein;	cytosol		cytosol:21166475;cytosol:15821981;cytosol:22522809;extracellular:26572690;golgi:25900983;golgi:25900983;golgi:25900983;golgi:25900983;golgi:25900983;plasma membrane:25641898;plasma membrane:19334764;plasma membrane:22215637;plasma membrane:22318864;plasma membrane:26781341;vacuole:23903016;vacuole:25900983	3.12038
AT3G03780.1	methionine synthase 2;Encodes a cytosolic methionine synthase, involved in methionine regeneration via the activated methyl cycle (or SAM cycle)	cytosol	cytosol:15024005	cytosol:21166475;extracellular:18998720;extracellular:26572690;mitochondrion:24727099;mitochondrion:27122571;plasma membrane:17644812;plasma membrane:19334764;plasma membrane:22318864;plasma membrane:26781341;plastid:12938931;plastid:15028209;plastid:18431481;plastid:24361574;vacuole:23903016	3.19785
AT3G07750.1	3'-5'-exoribonuclease family protein;	cytosol			1.6232
AT3G13580.1	Ribosomal protein L30/L7 family protein;	cytosol		cytosol:17934214;cytosol:15734919;cytosol:15821981;cytosol:22522809;golgi:25900983;golgi:25900983;nucleus:23396599;plasma membrane:25641898;plastid:15028209;vacuole:23903016;vacuole:25900983	0.833627
AT3G46440.1	UDP-XYL synthase 5;encodes a protein similar to UDP-glucuronic acid decarboxylase. UDP-glucuronic acid decarboxylase produces UDP-xylose, which is a substrate for many cell wall carbohydrates including hemicellulose and pectin. UDP-xylose is also known to feedback regulate several cell wall biosynthetic enzymes.	cytosol		cytosol:21166475;plasma membrane:25641898;vacuole:23903016	0.600539
AT3G52580.1	Ribosomal protein S11 family protein;	cytosol		cytosol:22522809;extracellular:26572690;golgi:25900983;golgi:25900983;golgi:25900983;golgi:25900983;nucleus:23396599;plasma membrane:25641898;plasma membrane:26781341	1.15223
AT3G60245.1	Zinc-binding ribosomal protein family protein;	cytosol		cytosol:17934214;cytosol:22522809;extracellular:26572690;golgi:25900983;golgi:25900983;golgi:25900983;golgi:25900983;golgi:25900983;nucleus:23396599;plasma membrane:25641898;plasma membrane:19334764;plasma membrane:22215637;vacuole:25900983	1.39098
AT4G00810.1	60S acidic ribosomal protein family;	cytosol		cytosol:17934214;cytosol:18433157;cytosol:22522809;nucleus:18433157	0.829327
AT4G10480.1	Nascent polypeptide-associated complex (NAC), alpha subunit family protein;	cytosol		extracellular:26572690;plasma membrane:26781341	3.21561
AT4G22720.1	Actin-like ATPase superfamily protein;	cytosol		cytosol:21166475	0.733801
AT4G27490.1	3'-5'-exoribonuclease family protein;	cytosol	cytosol:23132787;nucleus:23132787		2.33307
AT4G29410.1	Ribosomal L28e protein family;	cytosol		cytosol:17934214;cytosol:22522809;extracellular:26572690;golgi:25900983;golgi:25900983;golgi:25900983;golgi:25900983;plasma membrane:25641898;plasma membrane:17317660;plasma membrane:19334764;plasma membrane:22215637;plasma membrane:22318864;plasma membrane:26781341	0.616121
AT4G29510.1	arginine methyltransferase 11;Has arginine N-methyltransferase activity. Modifies AtMBD7.	cytosol	cytosol:17666011;cytosol:17711414;nucleus:17666011;nucleus:17711414	cytosol:21166475;extracellular:26572690	1.02008
AT4G34215.1	Domain of unknown function (DUF303) ;Encodes a member of the SGNH-hydrolase superfamily of enzymes. The enzymes of the SGNH-hydrolase superfamily facilitate the hydrolysis of ester, thioester and amide bonds in a range of substrates including complex polysaccharides, lysophospholipids, acyl-CoA esters and other compounds.	cytosol			2.23917
AT4G36940.1	nicotinate phosphoribosyltransferase 1;	cytosol			2.01627
AT5G03850.1	Nucleic acid-binding, OB-fold-like protein;	cytosol		cytosol:22522809	0.859348
AT5G11950.1	Putative lysine decarboxylase family protein;Encodes a protein of unknown function. It has been crystallized and shown to be structurally almost identical to the protein encoded by At2G37210.	cytosol		cytosol:21166475;extracellular:26572690	1.53721
AT5G13850.1	nascent polypeptide-associated complex subunit alpha-like protein 3;	cytosol		cytosol:21166475;golgi:22430844;mitochondrion:27943495;plasma membrane:26781341	2.06464
AT5G14530.1	Transducin/WD40 repeat-like superfamily protein;	cytosol			0.965369
AT5G16450.1	Ribonuclease E inhibitor RraA/Dimethylmenaquinone methyltransferase;	cytosol		extracellular:26572690	4.30011
AT5G17000.1	Zinc-binding dehydrogenase family protein;	cytosol			0.921313
AT5G20830.1	sucrose synthase 1;Encodes a protein with sucrose synthase activity (SUS1).	cytosol		cytosol:21166475;plasma membrane:19334764;plasma membrane:21433285;vacuole:23903016	1.13031
AT5G27450.1	mevalonate kinase;Encodes a protein with mevalonate kinase activity involved in the mevalonate pathway.	cytosol	cytosol:21655959	cytosol:21166475;extracellular:26572690	1.51313	Upregulated after (β-D-Glc)3 treatment: https://academic.oup.com/plphys/article/135/3/1346/6112082
AT5G38480.1	general regulatory factor 3;general regulatory factor, a 14-3-3 gene	cytosol	cytosol:19329564;plasma membrane:19329564	cytosol:21166475;extracellular:26572690;golgi:22430844;golgi:25900983;golgi:25900983;golgi:25900983;golgi:25900983;golgi:25900983;nucleus:27177187;peroxisome:19329564;plasma membrane:25641898;plasma membrane:17317660;plasma membrane:17644812;plasma membrane:22215637;plasma membrane:26781341;plastid:20061580;plastid:24361574;vacuole:23903016;vacuole:25900983	0.922731
AT5G44110.1	P-loop containing nucleoside triphosphate hydrolases superfamily protein;Encodes a member of the NAP subfamily of ABC transporters.	cytosol	cytosol:ISI:000238454800009		1.38504
AT5G46020.1	;	cytosol		cytosol:21166475;extracellular:26572690;plasma membrane:20843791;plasma membrane:26781341	1.22871
AT5G49510.1	prefoldin 3;	cytosol		cytosol:21166475;extracellular:26572690	1.12072
AT5G51970.1	GroES-like zinc-binding alcohol dehydrogenase family protein;Encodes a putative sorbitol dehydrogenase that can be thiolated in vitro.	cytosol	cytosol:23498864	cytosol:21166475;extracellular:26572690;plasma membrane:25641898;plasma membrane:22215637;plasma membrane:26781341;plastid:24361574	1.22922
AT5G53120.1	spermidine synthase 3;encodes a novel spermine synthase and is a paralog of previously characterized spermidine synthases, SPDS1 and SPDS2. SPDS3 forms heterodimers with SDPS2, which in turn forms heterodimers with SDPS1 in vivo. The gene does not complement speDelta3 deficiency of spermidine synthase in yeast but DOES complement speDelta4 deficiency.	cytosol			1.91817
AT5G59160.1	type one serine/threonine protein phosphatase 2;Encodes the catalytic subunit of a Type 1 phosphoprotein Ser/Thr phosphatase, expressed in roots, shoots and flowers.	cytosol		extracellular:26572690	1.44176
AT5G63990.1	Inositol monophosphatase family protein;	cytosol			0.843014
AT1G79210.1	N-terminal nucleophile aminohydrolases (Ntn hydrolases) superfamily protein;	cytosol,nucleus		cytosol:21166475;plasma membrane:22215637	2.21753
AT3G04400.1	Ribosomal protein L14p/L23e family protein;	cytosol,nucleus		cytosol:22522809;extracellular:26572690;plasma membrane:25641898;plasma membrane:22215637	2.99967
AT4G16660.1	heat shock protein 70 (Hsp 70) family protein;	endoplasmic reticulum		endoplasmic reticulum:22923678;golgi:22430844;golgi:25900983;plasma membrane:25641898;plasma membrane:21433285;plasma membrane:26781341;plastid:15028209;vacuole:17151019	3.01691
AT1G26570.1	UDP-glucose dehydrogenase 1;	extracellular		plasma membrane:19334764	1.18315
AT1G62810.1	Copper amine oxidase family protein;	extracellular		extracellular:26572690	0.678506
AT2G27190.1	purple acid phosphatase 12;secreted purple acid phosphatase precursor	extracellular		cytosol:21166475;extracellular:21109274;extracellular:26572690;extracellular:28155257;plasma membrane:21433285	1.56591
AT3G29360.1	UDP-glucose 6-dehydrogenase family protein;	extracellular		cytosol:21166475;extracellular:26572690;golgi:25900983;golgi:25900983;golgi:25900983;golgi:25900983;golgi:25900983;mitochondrion:27122571;plasma membrane:25641898;plasma membrane:20843791;plasma membrane:21433285;vacuole:18686298;vacuole:25900983	0.652616
AT3G56310.1	Melibiase family protein;	extracellular		extracellular:18998720;extracellular:24393051;extracellular:26572690;extracellular:28155257;vacuole:15215502;vacuole:15539469;vacuole:23903016	2.34187
AT4G20430.1	Subtilase family protein;	extracellular		extracellular:24665109;extracellular:28155257	1.32198
AT5G21105.1	Plant L-ascorbate oxidase;	extracellular		extracellular:14595688;extracellular:16356755;extracellular:25805245;extracellular:26572690;plasma membrane:19334764;plasma membrane:21433285	1.64718
AT5G55730.1	FASCICLIN-like arabinogalactan 1;fasciclin-like arabinogalactan-protein 1 (Fla1)	extracellular		extracellular:15593128;extracellular:16356755;extracellular:18998720;extracellular:21109274;extracellular:24393051;extracellular:26572690;extracellular:28155257;golgi:25900983;golgi:25900983;plasma membrane:12805588;plasma membrane:14517339;plasma membrane:16602701;plasma membrane:16618929;plasma membrane:17317660;plasma membrane:17644812;plasma membrane:19334764;plasma membrane:20843791;plasma m…	1.24457
AT5G16510.1	Alpha-1,4-glucan-protein synthase family protein;	extracellular,cytosol	cytosol:21478444	cytosol:21166475;extracellular:18998720;extracellular:26572690;vacuole:23903016	1.00239
AT1G12000.1	Phosphofructokinase family protein;	golgi		cytosol:21166475;extracellular:26572690;golgi:25900983;golgi:25900983;golgi:25900983;golgi:25900983;golgi:25900983;plasma membrane:19334764;plasma membrane:26781341;vacuole:25900983	0.958543
AT1G43890.1	RAB GTPASE HOMOLOG B18;ras-related small GTPase	golgi		golgi:25900983;golgi:25900983;golgi:25900983;golgi:25900983;golgi:25900983;plasma membrane:17644812;plasma membrane:22215637;plasma membrane:22318864;plasma membrane:26781341;vacuole:23903016	2.15384
AT1G36310.1	S-adenosyl-L-methionine-dependent methyltransferases superfamily protein;	mitochondrion			3.57504
AT5G20060.1	alpha/beta-Hydrolases superfamily protein;	mitochondrion			1.58318
AT1G07020.1	;	nucleus			1.23881
AT1G11360.1	Adenine nucleotide alpha hydrolases-like superfamily protein;	nucleus		extracellular:26572690;plasma membrane:17317660	1.75784
AT1G13690.1	ATPase E1;AtE1 - stimulates the ATPase activity of DnaK/DnaJ	nucleus		plasma membrane:19334764	1.0356
AT1G15340.1	methyl-CPG-binding domain 10;Protein containing methyl-CpG-binding domain.Has sequence similarity to human MBD proteins.	nucleus		cytosol:21166475;extracellular:26572690	1.52175
AT1G17880.1	basic transcription factor 3;	nucleus		extracellular:26572690	2.11882
AT1G69510.1	cAMP-regulated phosphoprotein 19-related protein;	nucleus			1.39942
AT1G77710.1	;	nucleus			1.78145
AT2G26060.1	Transducin/WD40 repeat-like superfamily protein;	nucleus	cytosol:23104832;nucleus:23104832		1.382
AT2G34260.1	transducin family protein / WD-40 repeat family protein;	nucleus	cytosol:22447688;nucleus:22447688		1.3709
AT2G43810.1	Small nuclear ribonucleoprotein family protein;	nucleus		extracellular:26572690	1.49669
AT3G12390.1	Nascent polypeptide-associated complex (NAC), alpha subunit family protein;	nucleus		cytosol:21166475;extracellular:26572690;golgi:21826108;mitochondrion:27122571;mitochondrion:27943495;nucleus:23396599;plasma membrane:15574830;plasma membrane:19334764;plasma membrane:26781341	0.86666
AT3G13235.1	ubiquitin family protein;	nucleus		cytosol:18433157;cytosol:21166475;extracellular:26572690;nucleus:18433157	1.90265
AT3G49470.1	nascent polypeptide-associated complex subunit alpha-like protein 2;	nucleus		cytosol:21166475;extracellular:26572690	1.7503
AT3G58600.1	Adaptin ear-binding coat-associated protein 1 NECAP-1;	nucleus		extracellular:26572690;plastid:23667806	1.36271
AT3G62250.1	ubiquitin 5;	nucleus		cytosol:17934214;cytosol:22522809;golgi:22430844;golgi:25900983;golgi:25900983;golgi:25900983;golgi:25900983;golgi:25900983;plasma membrane:22215637;plastid:24361574	1.48047
AT4G23040.1	Ubiquitin-like superfamily protein;	nucleus		cytosol:18433157;nucleus:18433157	1.30292
AT4G39860.1	;	nucleus			1.30155
AT5G09390.1	CD2-binding protein-related;	nucleus			2.58977
AT5G13970.1	;	nucleus			1.90515
AT1G11840.1	glyoxalase I homolog;Encodes a glyoxalase I homolog ATGLX1.	peroxisome		cytosol:21166475;extracellular:26572690;mitochondrion:27122571;peroxisome:19329564;plasma membrane:17317660;plasma membrane:22215637;plasma membrane:26781341;plastid:12938931;plastid:24361574	1.11412
AT4G02340.1	alpha/beta-Hydrolases superfamily protein;	peroxisome	peroxisome:17951448	peroxisome:17951448;peroxisome:18931141;peroxisome:19329564	2.24021
AT5G66120.1	3-dehydroquinate synthase, putative;	peroxisome		golgi:22923678;plastid:21531424;plastid:24361574	1.1917
AT1G18210.1	Calcium-binding EF-hand family protein;	plasma membrane		extracellular:26572690;plasma membrane:17317660;plasma membrane:19334764;plasma membrane:22318864	0.805306
AT1G70410.1	beta carbonic anhydrase 4;Encodes a putative beta-carbonic anhydrase betaCA4. Together with betaCA1 (At3g01500) regulates CO2-controlled stomatal movements in guard cells.	plasma membrane	plasma membrane:26243620	extracellular:26572690;golgi:25900983;golgi:25900983;golgi:25900983;golgi:25900983;golgi:25900983;plasma membrane:25641898;plasma membrane:22215637;plastid:12938931;vacuole:25900983	1.37253
AT5G13520.1	peptidase M1 family protein;	plasma membrane		cytosol:21166475;plasma membrane:21433285	2.30115
AT1G12900.1	glyceraldehyde 3-phosphate dehydrogenase A subunit 2;	plastid		cytosol:22522809;golgi:25900983;golgi:25900983;mitochondrion:27122571;mitochondrion:27943495;nucleus:23396599;plasma membrane:19334764;plastid:12766230;plastid:15028209;plastid:16207701;plastid:21531424;plastid:23851315;plastid:20061580;plastid:24872594;plastid:18431481;plastid:18633119;plastid:20061580;plastid:21539947;plastid:23549413;plastid:24361574;plastid:24872594;plastid:23667806	0.625744
AT1G30510.1	root FNR 2;Encodes a root-type ferredoxin:NADP(H) oxidoreductase.	plastid		extracellular:26572690;plastid:24361574	2.24154
AT2G21330.1	fructose-bisphosphate aldolase 1;	plastid	plastid:16414959	golgi:25900983;golgi:25900983;golgi:25900983;golgi:25900983;plastid:11719511;plastid:12938931;plastid:15028209;plastid:16207701;plastid:16648217;plastid:19288221;plastid:20423899;plastid:21531424;plastid:22274653;plastid:23851315;plastid:25740923;plastid:24872594;plastid:18431481;plastid:18633119;plastid:20061580;plastid:21539947;plastid:23549413;plastid:24361574;plastid:24872594;plastid:16414959…	2.31756
AT2G37500.1	arginine biosynthesis protein ArgJ family;	plastid		extracellular:26572690;mitochondrion:21841088;plastid:20423899;plastid:23549413;plastid:23851315;plastid:18431481;plastid:20061580;plastid:24361574	1.44271
AT3G49680.1	branched-chain aminotransferase 3;Encodes a chloroplast branched-chain amino acid aminotransferase. Complements the yeast leu/iso-leu/val auxotrophy mutant.	plastid	plastid:12068099	extracellular:26572690;plastid:20423899;plastid:21531424;plastid:23851315;plastid:18431481;plastid:20061580;plastid:24361574	1.31142
AT3G54640.1	tryptophan synthase alpha chain;Catalyzes the conversion of indole-3-glycerolphosphate to indole, the penultimate reaction in the biosynthesis of tryptophan. Functions as a heterocomplex with tryptophan synthase beta subunit (TSA2).	plastid		extracellular:26572690;golgi:25900983;golgi:25900983;golgi:25900983;golgi:25900983;plasma membrane:19334764;plastid:16207701;plastid:20423899;plastid:21531424;plastid:18431481;plastid:20061580;plastid:24361574	0.998234
AT4G13430.1	isopropyl malate isomerase large subunit 1;Encodes methylthioalkylmalate isomerase.	plastid		extracellular:26572690;golgi:25900983;mitochondrion:27122571;mitochondrion:27943495;plastid:18431481;plastid:20423899;plastid:21531424;plastid:22923678;plastid:23851315;plastid:18633119;plastid:20061580;plastid:24361574;plastid:24872594	1.05607
AT4G19710.1	aspartate kinase-homoserine dehydrogenase ii;Encodes a bifunctional aspartate kinase/homoserine dehydrogenase. These two activities catalyze the first and the third steps toward the synthesis of the essential amino acids threonine, isoleucine and methionine.	plastid		plastid:21531424;plastid:24361574	1.34991
AT4G25100.1	Fe superoxide dismutase 1;Fe-superoxide dismutase	plastid	plastid:23057508	extracellular:18998720;extracellular:25852701;mitochondrion:12492832;mitochondrion:15276431;mitochondrion:21841088;nucleus:15496452;plasma membrane:15060130;plasma membrane:17644812;plasma membrane:19334764;plasma membrane:26781341;plastid:11826309;plastid:12766230;plastid:14729914;plastid:15028209;plastid:16207701;plastid:20423899;plastid:21531424;plastid:23851315;plastid:18431481;plastid:200615…	1.10537
AT5G04740.1	ACT domain-containing protein;	plastid		extracellular:26572690;golgi:25900983;golgi:25900983;golgi:25900983;golgi:25900983;golgi:25900983;plastid:15322131;plastid:21531424;plastid:18431481;plastid:18633119;plastid:20061580;plastid:24361574;plastid:24872594;vacuole:25900983	0.72004
AT5G10330.1	histidinol phosphate aminotransferase 1;Encodes histidinol-phosphate aminotransferase that catalyzes the eighth step in histidine biosynthesis. Loss of function mutations are embryo lethal.	plastid		plastid:24361574	1.32749
AT5G17710.1	Co-chaperone GrpE family protein;	plastid		plastid:11826309;plastid:16207701;plastid:16648217;plastid:20423899;plastid:21531424;plastid:23851315;plastid:18431481;plastid:18633119;plastid:20061580;plastid:21539947;plastid:24361574;plastid:24872594	1.19247
AT5G19150.1	pfkB-like carbohydrate kinase family protein;	plastid	cytosol:24599492	extracellular:26572690;mitochondrion:27943495	0.76188
AT5G24650.1	Mitochondrial import inner membrane translocase subunit Tim17/Tim22/Tim23 family protein;	plastid	mitochondrion:17098851;mitochondrion:28544763;plastid:28544763	golgi:25900983;golgi:25900983;golgi:25900983;mitochondrion:21296373;mitochondrion:21896887;plasma membrane:15060130;plasma membrane:19334764;plastid:12766230;plastid:12938931;plastid:18431481;plastid:21531424;plastid:22923678;plastid:20061580;plastid:24872594;vacuole:14760709;vacuole:17151019	2.05059
AT5G61410.1	D-ribulose-5-phosphate-3-epimerase;Arabidopsis thaliana ribulose-5-phosphate-3-epimerase mRNA	plastid		golgi:25900983;golgi:25900983;golgi:25900983;golgi:25900983;golgi:25900983;plastid:12938931;plastid:16207701;plastid:16648217;plastid:20423899;plastid:21531424;plastid:25740923;plastid:16923014;plastid:18431481;plastid:18633119;plastid:20061580;plastid:24361574;plastid:24872594;vacuole:25900983	1.16997
AT1G04410.1	Lactate/malate dehydrogenase family protein;	vacuole		extracellular:26572690;golgi:25900983;golgi:25900983;golgi:25900983;golgi:25900983;golgi:25900983;mitochondrion:27122571;nucleus:14617066;plasma membrane:25641898;plasma membrane:15574830;plasma membrane:17317660;plasma membrane:17644812;plasma membrane:19334764;plasma membrane:20843791;plasma membrane:21433285;plasma membrane:22215637;plasma membrane:26781341;plastid:16207701;plastid:20061580;pl…	2.25291
AT1G11910.1	aspartic proteinase A1;Encodes an aspartic proteinase that forms a heterodimer and is stable over a broad pH range (ph 3-8).	vacuole		cytosol:21166475;extracellular:26572690;golgi:25900983;golgi:25900983;golgi:25900983;golgi:25900983;golgi:25900983;mitochondrion:27122571;plasma membrane:19334764;plasma membrane:22318864;vacuole:15215502;vacuole:15539469;vacuole:23903016;vacuole:25900983	1.44667
AT1G52570.1	phospholipase D alpha 2;member of C2-PLD subfamily	vacuole		plasma membrane:19334764;plastid:12938931	1.08621
AT1G78680.1	gamma-glutamyl hydrolase 2;The Arabidopsis protein AtGGH2 is a gamma-glutamyl hydrolase acting specifically on monoglutamates. The enzyme is involved in the tetrahydrofolate metabolism and located to the vacuole.	vacuole		extracellular:26572690;extracellular:28155257;vacuole:15539469	1.80621
AT2G14260.1	proline iminopeptidase;encodes proline iminopeptidase	vacuole		cytosol:21166475;golgi:25900983;plasma membrane:25641898;plastid:18431481;plastid:24361574	1.44857
AT3G01390.1	vacuolar membrane ATPase 10;Subunit G of the vacuolar membrane ATPAse complex	vacuole		cytosol:21166475;extracellular:26572690;golgi:22430844;golgi:21826108;golgi:25900983;plasma membrane:25641898;plasma membrane:15060130;plasma membrane:20843791;plasma membrane:22215637;plasma membrane:26781341;plastid:20061580;vacuole:15215502;vacuole:17151019;vacuole:22923678;vacuole:23903016	0.962579
AT4G38510.1	ATPase, V1 complex, subunit B protein;	vacuole		golgi:22430844;golgi:25900983;golgi:25900983;golgi:25900983;plasma membrane:25641898;plasma membrane:15574830;plasma membrane:19334764;plasma membrane:21433285;plasma membrane:22215637;plasma membrane:22318864;plasma membrane:26781341;plastid:12938931;plastid:20061580;plastid:23390424;vacuole:15215502;vacuole:15539469;vacuole:17151019;vacuole:22923678;vacuole:23903016;vacuole:25900983	0.885805
AT1G02880.1	thiamin pyrophosphokinase1;Encodes a thiamine pyrophosphokinase capable of producing thiamine pyrophosphate from free thiamine.	cytosol		extracellular:26572690	1.39571
AT1G05620.1	uridine-ribohydrolase 2;	cytosol	cytosol:24130159	cytosol:21166475	1.72719
AT1G07750.1	RmlC-like cupins superfamily protein;	cytosol		cytosol:21166475;extracellular:26572690;golgi:22430844	0.779557
AT1G80460.1	Actin-like ATPase superfamily protein;Encodes a protein similar to glycerol kinase, which converts glycerol to glycerol 3-phosphate and performs a rate-limiting step in glycerol metabolism. This gene is required for both general and specific resistance against bacteria and fungi. Arabidopsis thaliana glycerol kinase (GLR1) mRNA.Involved in flagellin-induced non-host resistance to Pseudomonas. Cor…	cytosol		cytosol:21166475;extracellular:26572690;golgi:25900983;golgi:25900983;golgi:25900983;vacuole:25900983	1.22989
AT3G22850.1	Aluminium induced protein with YGL and LRDR motifs;	cytosol		extracellular:26572690;golgi:25900983;mitochondrion:27122571;plasma membrane:17644812	0.923312
AT1G20450.1	Dehydrin family protein;Encodes a gene induced by low temperature and dehydration. Inhibits e.coli growth while overexpressed. Belongs to the dehydrin protein family, which contains highly conserved stretches of 7-17 residues that are repetitively scattered in their sequences, the K-, S-, Y- and lysine rich segments. LTI29 and LTI30 double overexpressors confer cold tolerance. Localized to membra…	cytosol,plasma membrane	cytosol:17010111	cytosol:21166475;extracellular:26572690;plasma membrane:15574830;plasma membrane:22215637;plasma membrane:26781341;plastid:20061580;plastid:24361574	1.70565
AT2G27040.1	Argonaute family protein;AGO4 is a member of a class of PAZ/PIWI domain containing proteins involved in siRNA mediated gene silencing.Loss of function mutations have reduced site specific CpNpG and CpHpH methylation and increased susceptibility to bacterial pathogens.	nucleus	nucleus:15024409		1.1632
AT5G52310.1	low-temperature-responsive protein 78 (LTI78) / desiccation-responsive protein 29A (RD29A);cold regulated gene, the 5' region of cor78 has cis-acting regulatory elements that can impart cold-regulated gene expression	nucleus		mitochondrion:27122571;plasma membrane:22215637;plastid:20423899	1.29302
AT2G24390.1	AIG2-like (avirulence induced gene) family protein;	plasma membrane			1.59051
AT1G55490.1	chaperonin 60 beta;encodes the beta subunit of the chloroplast chaperonin 60, a homologue of bacterial GroEL. Mutants in this gene develops lesions on its leaves, expresses systemic acquired resistance (SAR) and develops accelerated cell death to heat shock stress. The protein has molecular chaperone activity for suppressing protein aggregation in vitro.	plastid		extracellular:26572690;golgi:25900983;golgi:25900983;golgi:25900983;golgi:25900983;golgi:25900983;nucleus:23396599;plasma membrane:25641898;plasma membrane:17317660;plasma membrane:19334764;plasma membrane:22318864;plasma membrane:26781341;plastid:12766230;plastid:12938931;plastid:15028209;plastid:16207701;plastid:20423899;plastid:21531424;plastid:23851315;plastid:25740923;plastid:16923014;plasti…	0.728727
AT2G43710.1	Plant stearoyl-acyl-carrier-protein desaturase family protein;Encodes a stearoyl-ACP desaturase, involved in fatty acid desaturation. The ssi2 mutants have increased 18:0 and reduced 18:1 fatty acids. Exogenous application of glycerol to wild type plants mimics the ssi2 mutant phenotype. The altered 18:1 fatty acid content in the ssi2 mutants has an impact on SA- and JA-mediated defense signaling…	plastid		extracellular:26572690;golgi:25900983;plastid:16207701;plastid:20423899;plastid:21531424;plastid:18431481;plastid:18633119;plastid:20061580;plastid:24361574;plastid:24872594;plastid:20061580;plastid:24872594;vacuole:25900983	0.822541
AT2G22475.1	GRAM domain family protein;Encodes GL2-expression modulator (GEM). Involved in the spatial control of cell division, patterning and differentiation of Arabidopsis root epidermal cells. GEM interacts with CDT1, a DNA replication protein and TTG1 (TRANSPARENT TESTA GLABRA1), a WD40-repeat protein involved in GL2-dependent cell fate decision. GEM seems to participate in the maintenance of a represso…	cytosol		cytosol:21166475;extracellular:26572690;golgi:25900983;golgi:25900983;golgi:25900983;plastid:23549413;vacuole:25900983	1.45503
AT2G27530.1	Ribosomal protein L1p/L10e family;Encodes ribosomal protein L10aP. Identified in a screen for enhancers of as1. as1/pgy double mutants show defects in leaf vascular patterning and adaxial cell fate. Double mutant analysis indicates pgy genes function in the same pathway as REV, KAN1 and KAN2.	cytosol		cytosol:17934214;cytosol:21166475;cytosol:15734919;cytosol:22522809;extracellular:26572690;golgi:25900983;golgi:25900983;golgi:25900983;golgi:25900983;golgi:25900983;plasma membrane:25641898;plasma membrane:19334764;plasma membrane:22215637;plasma membrane:26781341;vacuole:23903016	0.88891
AT3G59380.1	farnesyltransferase A;Encodes the alpha-subunit shared between protein farnesyltransferase and protein geranylgeranyltransferase-I. Involved in protein prenylation: covalent attachment of the C-15 isoprene farnesyl or the C-20 isoprene geranylgeranyl groups to the C-terminal end of some proteins. Involved in shoot and flower meristem homeostasis, and response to ABA and drought. Also regulates le…	cytosol			4.28015
AT1G77440.1	20S proteasome beta subunit C2;Encodes beta subunit of 20s proteosome complex which is involved in protein degradation.	cytosol,nucleus			0.592786
AT3G26340.1	N-terminal nucleophile aminohydrolases (Ntn hydrolases) superfamily protein;	cytosol,nucleus		golgi:25900983;plasma membrane:25641898;vacuole:23903016	2.16746
AT3G27430.1	N-terminal nucleophile aminohydrolases (Ntn hydrolases) superfamily protein;Encodes 20S proteasome beta subunit PBB1 (PBB1).	cytosol,nucleus		extracellular:26572690;plasma membrane:25641898	2.51405
AT3G02540.1	Rad23 UV excision repair protein family;Encodes a member of the RADIATION SENSITIVE23 (RAD23) family: AT1G16190(RAD23A), AT1G79650(RAD23B), AT3G02540(RAD23C), AT5G38470(RAD23D). RAD23 proteins play an essential role in the cell cycle, morphology, and fertility of plants through their delivery of UPS (ubiquitin/26S proteasome system) substrates to the 26S proteasome.	nucleus			1.07787
AT5G51700.1	protein binding;zinc ion binding;Encodes a resistance signalling protein with two zinc binding (CHORD) domains that are highly conserved across eukaryotic phyla. Mutant has reduced RPS5 and RPM1 mediated resistance. Potentially involved in transduction of R gene mediated disease resistance. Required for R protein accumulation.	nucleus			1.4318
AT1G13930.1	;Involved in response to salt stress. Knockout mutants are hypersensitive to salt stress.	plastid		plasma membrane:25641898;plasma membrane:15060130;plasma membrane:17317660;plasma membrane:22215637;plasma membrane:26781341;plastid:12938931;plastid:16207701;plastid:18431481;plastid:21531424;plastid:20061580;plastid:18633119;plastid:20061580;plastid:24361574	1.86391
AT2G03800.1	D-aminoacyl-tRNA deacylases;encodes a D-aminoacyl-tRNA deacylase. Involved in detoxification of D-aminoacyl-tRNA. Mutants also show ethanol-hypersensitive phenotype.	cytosol		cytosol:21166475	1.6309
AT1G02170.1	metacaspase 1;Metacaspase AtMCP1b. Arginine/lysine-specific cysteine protease activity. Induces apoptosis in yeast. Contains Pfam profile PF00656: ICE-like protease (caspase) p20 domain	cytosol	cytosol:in house	plasma membrane:25641898	1.29874
AT1G51360.1	dimeric A/B barrel domainS-protein 1;Involved in defense against fungal pathogens and located in cytosol.	cytosol			1.80173
AT1G78380.1	glutathione S-transferase TAU 19;Encodes a glutathione transferase that is a member of Tau GST gene family. Expression is induced by drought stress, oxidative stress, and high doses of auxin and cytokinin. naming convention according to Wagner et al. (2002) The expression of this gene is upregulated by herbicide safeners such as benoxacor and fenclorim.	cytosol	cytosol:19174456;mitochondrion:24130194	cytosol:21166475;extracellular:18998720;extracellular:26572690;golgi:25900983;peroxisome:19329564;plasma membrane:25641898;plasma membrane:17644812;plasma membrane:22215637;plasma membrane:26781341;plastid:16207701;plastid:21531424;plastid:20061580;plastid:21539947;plastid:24361574;vacuole:17151019;vacuole:23903016	2.03064
AT2G16060.1	hemoglobin 1;Encodes a class 1 nonsymbiotic hemoglobin induced by low oxygen levels with very high oxygen affinity. It is not likely to be a hemoglobin transporter because of its extremely high affinity for oxygen.	cytosol	unclear:18931141	cytosol:21166475;plasma membrane:17644812	0.657003
AT2G29450.1	glutathione S-transferase tau 5;Encodes a member of the TAU glutathione S-transferase gene family. Gene expression is induced by exposure to auxin, pathogen and herbicides. Naming convention according to Wagner et al. (2002)	cytosol		cytosol:21166475;plasma membrane:25641898;plasma membrane:17644812;plasma membrane:22215637;plastid:24361574	1.6902
AT2G30870.1	glutathione S-transferase PHI 10;early dehydration-induced gene ERD13 homologous to tobacco and maize glutathione S-transferases. Encodes glutathione transferase belonging to the phi class of GSTs. Naming convention according to Wagner et al. (2002)	cytosol	cytosol:19329564	cytosol:21166475;extracellular:26572690;golgi:25900983;golgi:25900983;mitochondrion:27943495;nucleus:24012629;nucleus:27177187;peroxisome:19329564;plasma membrane:25641898;plasma membrane:17644812;plasma membrane:22215637;plasma membrane:22318864;plasma membrane:26781341;plastid:24361574;vacuole:15539469;vacuole:23903016;vacuole:25900983	1.19861
AT2G36530.1	Enolase;Involved in light-dependent cold tolerance and encodes an enolase. Protein is tyrosine-phosphorylated and its phosphorylation state is modulated in response to ABA in Arabidopsis thaliana seeds.	cytosol	cytosol:20002588;nucleus:20002588	cytosol:21166475;extracellular:15157177;extracellular:18998720;extracellular:25805245;extracellular:26572690;golgi:25900983;golgi:25900983;golgi:25900983;golgi:25900983;golgi:25900983;mitochondrion:27122571;peroxisome:19329564;plasma membrane:25641898;plasma membrane:15574830;plasma membrane:17317660;plasma membrane:17644812;plasma membrane:19334764;plasma membrane:20843791;plasma membrane:214332…	1.61861
AT3G12490.1	cystatin B;Encodes a protein with cysteine proteinase inhibitor activity. Overexpression increases tolerance to abiotic stressors (i.e.salt,osmitic, cold stress).	cytosol	cytosol:24019147	cytosol:21166475;endoplasmic reticulum:22923678;extracellular:26572690;plasma membrane:25641898;plasma membrane:26781341	0.638779
AT3G51780.1	BCL-2-associated athanogene 4;A member of Arabidopsis BAG (Bcl-2-associated athanogene) proteins, plant homologs of mammalian regulators of apoptosis. BD domain of ATBAG4 had highest similarity to human DB domain of BAG protein. Plant BAG proteins are multi-functional and remarkably similar to their animal counterparts, as they regulate apoptotic-like processes ranging from pathogen attack, to ab…	cytosol		cytosol:21166475;extracellular:26572690	1.22613
AT4G09000.1	general regulatory factor 1;Encodes a 14-3-3 gene, designated GRF1 chi (for general regulatory factor1-G-box factor 14-3-3 homolog isoform chi). The major native forms of 14-3-3s are homo- and hetero-dimers, the biological functions of which are to interact physically with specific client proteins and thereby effect a change in the client. As a result, 14-3-3s are involved in a vast array of proc…	cytosol		cytosol:21166475;extracellular:26572690;golgi:22430844;golgi:25900983;golgi:25900983;golgi:25900983;golgi:25900983;golgi:25900983;nucleus:14617066;plasma membrane:25641898;plasma membrane:17317660;plasma membrane:17644812;plasma membrane:19334764;plasma membrane:22215637;plasma membrane:22318864;plasma membrane:26781341;plastid:15028209;plastid:18431481;plastid:20061580;plastid:24361574;vacuole:2…	0.968175
AT4G34890.1	xanthine dehydrogenase 1;Encodes a xanthine dehydrogenase, involved in purine catabolism. Ubiquitously expressed, but the transcript level is altered during aging, senescence, salt and cold stress, ABA treatment, and dark treatment. RNAi lines that suppress both XDH1 and XDH2 produce small plants with reduced fertility and accelerated leaf senescence. Role in drought tolerance.	cytosol		cytosol:21166475;vacuole:23903016	0.645366
AT5G43830.1	Aluminium induced protein with YGL and LRDR motifs;	cytosol		cytosol:21166475;extracellular:26572690;golgi:25900983;golgi:25900983;golgi:25900983;golgi:25900983;plasma membrane:22215637;plasma membrane:26781341	1.2266
AT2G02990.1	ribonuclease 1;member of the ribonuclease T2 family, responds to inorganic phosphate starvation, and inhibits production of anthocyanin. Also involved in wound-induced signaling independent of jasmonic acid.	extracellular		extracellular:14595688;extracellular:16356755;extracellular:28003327;plasma membrane:17317660;plasma membrane:21433285	2.10117
AT5G64120.1	Peroxidase superfamily protein;encodes a cell wall bound peroxidase that is induced by hypo-osmolarity	extracellular		extracellular:14595688;extracellular:15694452;extracellular:16356755;extracellular:26572690;golgi:25900983;golgi:25900983;plasma membrane:19334764;vacuole:25900983	1.49028
AT2G21620.1	Adenine nucleotide alpha hydrolases-like superfamily protein;Encodes gene that is induced in response to dessication; mRNA expression is seen 10 and 24 hrs after start of dessication treatment.	plasma membrane		plasma membrane:22215637;plasma membrane:22923678	2.8641
AT3G03520.1	non-specific phospholipase C3;Lysophosphatidic acid phosphatase highly expressed during phosphate starvation and abiotic stresses. Role in lipid synthesis.	plasma membrane		extracellular:26572690;plasma membrane:19334764;plasma membrane:20843791;plasma membrane:21433285;plasma membrane:22215637;vacuole:15539469	2.30085
AT5G19140.1	Aluminium induced protein with YGL and LRDR motifs;	plasma membrane		extracellular:26572690;plasma membrane:17644812	1.2977
AT2G40300.1	ferritin 4;Encodes FERRITIN 4, AtFER4. Ferritins are a class of 24-mer multi-meric proteins found in all kingdoms of life. Function as the main iron store in mammals. Evidence suggests that Arabidopsis ferritins are essential to protect cells against oxidative damage, but they do not constitute the major iron pool. Localize to mitochondria. Knock out mutants are not sensitive to abiotic stress.	plastid		plasma membrane:19334764;plasma membrane:22318864;plastid:12938931;plastid:20423899;plastid:21531424;plastid:18431481;plastid:18633119;plastid:20061580;plastid:24361574	1.32275
AT4G37000.1	accelerated cell death 2 (ACD2);Mutants have spontaneous spreading cell death lesions and constitutive activation of defenses in the absence of pathogen infection. Its product was shown to display red chlorophyll catabolite reductase (RCCR), which catalyzes one step in the breakdown of the porphyrin component of chlorophyll. The enzyme was further assessed to be a Type-1 (pFCC-1-producing) RCCR.U…	plastid	plastid:19036033	plastid:12938931;plastid:16207701;plastid:20423899;plastid:21531424;plastid:18431481;plastid:20061580;plastid:24361574	0.915106
AT5G63980.1	Inositol monophosphatase family protein;Encodes a bifunctional protein that has 3'(2'),5'-bisphosphate nucleotidase and inositol polyphosphate 1-phosphatase activities and rescues sulfur assimilation mutants in yeast. It is involved in the response to cold, drought (negative regulator of drought tolerance), and ABA. Mutants in this gene exhibit enhanced induction of stress genes in response to co…	plastid	mitochondrion:22128124;plastid:22128124	cytosol:21166475;extracellular:26572690;mitochondrion:27122571;mitochondrion:27943495;plastid:16207701;plastid:20423899;plastid:21531424;plastid:20061580;plastid:24361574	1.29973
AT3G16050.1	pyridoxine biosynthesis 1.2;Encodes a protein with pyridoxal phosphate synthase activity whose transcripts were detected mostly in roots and accumulate during senescence. The protein was found in very low abundance, which prevented a specific localisation.	cytosol	cytosol:16157873	cytosol:21166475	2.91847
AT3G18030.1	HAL3-like protein A;flavin mononucleotide flavoprotein involved in salt and osmotic tolerance HAL3A encodes for phosphopantothenoylcysteine decarboxylase being involved in Coenzyme A biosynthesis. HAL3A is predominant over another gene with the presumably same function (HAL3B).	cytosol		cytosol:21166475;extracellular:26572690	0.645391
AT3G25530.1	glyoxylate reductase 1;Encodes gamma-hydroxybutyrate dehydrogenase (AtGHBDH). Contains a NADP-binding domain. GHBDH is proposed to function in oxidative stress tolerance.	cytosol	cytosol:18495639	cytosol:21166475;extracellular:26572690;golgi:25900983;peroxisome:19329564;plasma membrane:22215637;plasma membrane:26781341	1.89374
AT5G16970.1	alkenal reductase;encodes a 2-alkenal reductase (EC 1.3.1.74), plays a key role in the detoxification of reactive carbonyls	cytosol	cytosol:16299173;nucleus:16299173	cytosol:21166475;plasma membrane:25641898;plasma membrane:22318864;plasma membrane:26781341	1.93279
AT5G38470.1	Rad23 UV excision repair protein family;Encodes a member of the RADIATION SENSITIVE23 (RAD23) family: AT1G16190(RAD23A), AT1G79650(RAD23B), AT3G02540(RAD23C), AT5G38470(RAD23D). RAD23 proteins play an essential role in the cell cycle, morphology, and fertility of plants through their delivery of UPS (ubiquitin/26S proteasome system) substrates to the 26S proteasome.	cytosol		cytosol:21166475;extracellular:26572690;plasma membrane:25641898	0.745458
AT4G35830.1	aconitase 1;Encodes an aconitase that can catalyze the conversion of citrate to isocitrate through a cis-aconitate intermediate, indicating that it may participate in the TCA cycle and other primary metabolic pathways. The protein is believed to accumulate in the mitochondria and the cytosol. It affects CSD2 (At2g28190 - a superoxide dismutase) transcript levels and may play a role in the respons…	cytosol,mitochondrion	cytosol:in house	cytosol:21166475;extracellular:26572690;golgi:25900983;mitochondrion:14671022;mitochondrion:21296373;mitochondrion:21472856;mitochondrion:24727099;plasma membrane:17644812;plasma membrane:22215637;plasma membrane:26781341;plastid:24361574	0.996339
AT1G13060.1	20S proteasome beta subunit E1;Encodes 20S proteasome beta subunit PBE1 (PBE1).	cytosol,nucleus		golgi:25900983;plasma membrane:19334764;vacuole:23903016	0.941482
AT1G21720.1	proteasome beta subunit C1;20S proteasome beta subunit PBC1 truncated protein (PBC1)	cytosol,nucleus	unclear:10737809	cytosol:21166475;extracellular:26572690;nucleus:24012629;vacuole:17151019;vacuole:23903016	2.63812
AT1G56450.1	20S proteasome beta subunit G1;20S proteasome beta subunit PBG1 (PBG1) mRNA, complete cds	cytosol,nucleus		cytosol:21166475;extracellular:26572690;plasma membrane:26781341;vacuole:23903016	1.59188
AT2G05840.1	20S proteasome subunit PAA2;Encodes 20S proteasome subunit PAA2 (PAA2).	cytosol,nucleus		cytosol:15734919;plasma membrane:25641898;vacuole:23903016	1.10103
AT2G27020.1	20S proteasome alpha subunit G1;Encodes 20S proteasome alpha 7 subunit PAG1.	cytosol,nucleus	peroxisome:10737809	cytosol:21166475;extracellular:26572690;nucleus:14617066;plasma membrane:25641898;plasma membrane:19334764;plasma membrane:26781341;vacuole:15215502;vacuole:17151019;vacuole:23903016	0.85704
AT3G22110.1	20S proteasome alpha subunit C1;Encodes the alpha-3 subunit of 20s proteasome.	cytosol,nucleus		cytosol:21166475;extracellular:26572690;golgi:25900983;plasma membrane:19334764;plasma membrane:26781341;vacuole:15215502;vacuole:23903016	1.60197
AT3G51260.1	20S proteasome alpha subunit PAD1;20S proteosomal alpha subunits. Interacts with SnRK, SKP1/ASK1 during proteasomal binding of an SCF ubiquitin ligase.	cytosol,nucleus		cytosol:21166475;extracellular:26572690;golgi:25900983;golgi:25900983;golgi:25900983;golgi:25900983;golgi:25900983;plasma membrane:19334764;plasma membrane:22215637;plasma membrane:26781341;plastid:15028209;vacuole:15215502;vacuole:17151019;vacuole:23903016;vacuole:25900983	1.95477
AT3G60820.1	N-terminal nucleophile aminohydrolases (Ntn hydrolases) superfamily protein;Encodes 20S proteasome beta subunit PBF1 (PBF1).	cytosol,nucleus		cytosol:21166475;extracellular:26572690;golgi:25900983;golgi:25900983;golgi:25900983;golgi:25900983;plasma membrane:25641898;plasma membrane:17644812;plasma membrane:19334764;plasma membrane:22215637;plasma membrane:26781341;plastid:15028209;vacuole:23903016	0.906283
AT4G31300.1	N-terminal nucleophile aminohydrolases (Ntn hydrolases) superfamily protein;Encodes 20S proteasome subunit PBA1 (PBA1).	cytosol,nucleus		cytosol:21166475;extracellular:26572690;golgi:25900983;golgi:25900983;golgi:25900983;nucleus:27177187;plasma membrane:19334764;plastid:24872594;vacuole:15215502;vacuole:17151019	1.40952
AT5G35590.1	proteasome alpha subunit A1;Encodes 20S proteasome subunit PAA1 (PAA1).	cytosol,nucleus		cytosol:21166475;extracellular:26572690;nucleus:24012629;plasma membrane:25641898;vacuole:17151019;vacuole:23903016	1.60642
AT5G42790.1	proteasome alpha subunit F1;encodes a protein with extensive homology to the largest subunit of the multicatalytic proteinase complex (proteasome). Negatively regulates thiol biosynthesis and arsenic tolerance.	cytosol,nucleus		cytosol:21166475;extracellular:26572690;golgi:25900983;plasma membrane:17317660;plasma membrane:19334764;plasma membrane:26781341;vacuole:23903016	0.762807
AT5G63860.1	Regulator of chromosome condensation (RCC1) family protein;UV-B-specific signaling component that orchestrates expression of a range of genes with vital UV-protective functions. Located in the nucleus and the cytosol. Associates with chromatin via histones. UV-B light promotes URV8 protein accumulation in the nucleus.	cytosol,nucleus			1.16642
AT4G14800.1	20S proteasome beta subunit D2;Encodes 20S proteasome beta subunit PBD2 (PBD2).	cytosol,vacuole		plasma membrane:19334764;vacuole:15215502;vacuole:23903016	1.62246
AT3G53970.1	proteasome inhibitor-related;	mitochondrion			2.44015
AT4G05420.1	damaged DNA binding protein 1A;Structurally similar to damaged DNA binding proteins.DDB1a is part of a 350 KDa nuclear localized DET1 protein complex. This complex may physically interact with histone tails and while bound to chromatin- repress transcription of genes involved in photomorphogenesis.	nucleus		cytosol:21166475;extracellular:26572690;golgi:25900983;golgi:25900983;golgi:25900983;nucleus:23396599	0.966918
AT1G35720.1	annexin 1;Encodes a member of the annexin gene family, a diverse, multigene family of calcium-dependent, membrane-binding proteins. The protein was determined to have peroxidase activity. This activity is thought to be dependent on the presence of post-translational modifications (most likely phosphorylation). The protein was shown to be present as a mixture of monomer and homodimer. The homodime…	peroxisome		cytosol:25587034;extracellular:26572690;mitochondrion:27122571;mitochondrion:27943495;nucleus:24012629;peroxisome:14581625;peroxisome:18931141;plasma membrane:25641898;plasma membrane:15574830;plasma membrane:17317660;plasma membrane:17644812;plasma membrane:19334764;plasma membrane:22215637;plasma membrane:22318864;plasma membrane:26781341;plasma membrane:28443122;plastid:14729914;plastid:150282…	0.923829
AT3G52880.1	monodehydroascorbate reductase 1;Encodes a peroxisomal monodehydroascorbate reductase, involved in the ascorbate-glutathione cycle which removes toxic H2O2	peroxisome		extracellular:25805245;extracellular:26572690;peroxisome:17951448;peroxisome:18931141;peroxisome:19329564;plasma membrane:25641898;plasma membrane:17317660;plasma membrane:19334764;plasma membrane:21433285;plasma membrane:22318864;plasma membrane:26781341;plastid:20061580;plastid:24361574	2.44068
AT3G56240.1	copper chaperone;CCH protein belongs to a family of eukaryotic proteins that participate in intracellular copper homeostasis by delivering this metal to the secretory pathway; mainly located along the vascular bundles of senescing leaves and petioles as well as in stem sieve elements; hypothesized to have a role in copper mobilization from decaying organs towards reproductive structures, as a res…	peroxisome	cytosol:19329564	peroxisome:19329564;plasma membrane:26781341;plastid:18431481	1.16942
AT3G25780.1	allene oxide cyclase 3;Encodes allene oxide cyclase, one of the enzymes involved in jasmonic acid biosynthesis. One of four genes in Arabidopsis that encode this enzyme. mRNA expression is upregulated in senescing leaves. Note: Nomenclature for Arabidopsis allene oxide cyclase 3 (AOC3, AT3G25780) gene is based on Stenzel et al. 2003 Plant Molecular Biology 51:895-911. AOC3 (AT3G25780) is also ref…	plasma membrane		cytosol:22522809;extracellular:26572690;mitochondrion:27943495;plasma membrane:16618929;plasma membrane:20843791;plasma membrane:22923678;plastid:20061580;vacuole:17151019	1.74068
AT1G42970.1	glyceraldehyde-3-phosphate dehydrogenase B subunit;Encodes chloroplast localized glyceraldehyde-3-phosphate dehydrogenase that can use both NADH and NADPH to reduce 1,3-diphosphate glycerate. It forms A2B2 heterotetramers with GapA forms of the GADPH enzyme. These complexes are active in the light under reducing conditions, but show reduced NADPH-dependent activity in response to oxidized thiored…	plastid		cytosol:22522809;golgi:25900983;golgi:25900983;golgi:25900983;golgi:25900983;golgi:25900983;mitochondrion:27943495;nucleus:23396599;plasma membrane:25641898;plasma membrane:19334764;plasma membrane:22215637;plasma membrane:26781341;plastid:12766230;plastid:12938931;plastid:15028209;plastid:15322131;plastid:16207701;plastid:20423899;plastid:21531424;plastid:23549413;plastid:23851315;plastid:257409…	1.15737
AT2G21170.1	triosephosphate isomerase;Encodes a plastidic triose phosphate isomerase. Mutants with reduced pdTPI levels have difficulty transitioning from heterotrophic to autotrophic growth. The related phenotypes, such as chlorosis in light-grown seedlings may result from an accumulation of dihydroxyacetone phosphate (DHAP) and methylglyoxal (MG) in these mutants. Both splice variants appear to be expresse…	plastid	cytosol:10737809;plastid:19036033	cytosol:21166475;extracellular:26572690;mitochondrion:14671022;mitochondrion:21841088;mitochondrion:27122571;mitochondrion:27943495;plasma membrane:25641898;plasma membrane:19334764;plastid:12938931;plastid:15028209;plastid:16207701;plastid:16648217;plastid:20423899;plastid:21531424;plastid:23851315;plastid:18431481;plastid:18633119;plastid:20061580;plastid:21539947;plastid:24361574;plastid:24872…	2.06057
AT5G63310.1	nucleoside diphosphate kinase 2;Maintains intracellular dNTP levels except ATP. Plays a role in response to oxidative stress and UV. Involved in phytochrome-mediated light signaling. Participates in auxin-regulated processes, partly through the modulation of auxin transport. H-bonding with His-197 inside the nucleotide-binding pocket is critical for NDPK2 functioning.	plastid	nucleus:10358052;plastid:17562072;unclear:15604726	extracellular:26572690;plastid:12938931;plastid:16207701;plastid:16648217;plastid:21531424;plastid:23851315;plastid:18431481;plastid:18633119;plastid:20061580;plastid:21539947;plastid:24361574;plastid:24872594	1.22805
AT4G36195.1	Serine carboxypeptidase S28 family protein;	extracellular		extracellular:24393051;extracellular:26572690;extracellular:28155257;vacuole:15215502;vacuole:15539469;vacuole:17151019;vacuole:23903016	1.96939
AT1G01050.1	pyrophosphorylase 1;Encodes a soluble protein with inorganic pyrophosphatase activity that is highly specific for Mg-inorganic pyrophosphate.	cytosol	unclear:15610358	cytosol:21166475;extracellular:26572690;golgi:25900983;golgi:25900983	1.54757
AT1G05350.1	NAD(P)-binding Rossmann-fold superfamily protein;	cytosol		cytosol:21166475;golgi:25900983	1.03601
AT1G08360.1	Ribosomal protein L1p/L10e family;	cytosol		cytosol:17934214;cytosol:21166475;cytosol:15734919;cytosol:15821981;cytosol:22522809;extracellular:26572690;golgi:25900983;golgi:25900983;golgi:25900983;golgi:25900983;golgi:25900983;plasma membrane:25641898;plasma membrane:17317660;plasma membrane:19334764;plasma membrane:22215637;plasma membrane:26781341;vacuole:23903016;vacuole:25900983	2.28869
AT1G12050.1	fumarylacetoacetase, putative;	cytosol		cytosol:21166475;extracellular:26572690;plasma membrane:25641898	1.00156
AT1G12310.1	Calcium-binding EF-hand family protein;	cytosol		cytosol:21166475;cytosol:22522809;extracellular:26572690;golgi:25900983;golgi:25900983;golgi:25900983;golgi:25900983;nucleus:14617066;plasma membrane:25641898;plasma membrane:17644812;plasma membrane:22215637;plasma membrane:22923678;plasma membrane:26781341	3.00086
AT1G14320.1	Ribosomal protein L16p/L10e family protein;Encodes a ribosomal protein L10 and may be involved in translation regulation. Semi-dominant mutations in SAC552 can suppress defects in acaulis5, which encodes a thermospermine synthase, by enhancing translation of acl5 and itself.	cytosol	cytosol:23886624;nucleus:23886624	cytosol:17934214;cytosol:21166475;cytosol:15734919;cytosol:15821981;cytosol:22522809;extracellular:26572690;golgi:25900983;golgi:25900983;golgi:25900983;golgi:25900983;golgi:25900983;mitochondrion:21841088;nucleus:23396599;plasma membrane:25641898;plasma membrane:19334764;plasma membrane:21433285;plasma membrane:22215637;plasma membrane:26781341;vacuole:17151019;vacuole:23903016;vacuole:25900983	1.66844
AT1G15230.1	;	cytosol			1.05928
AT1G20010.1	tubulin beta-5 chain;beta tubulin	cytosol		cytosol:28611809;extracellular:26572690;golgi:25900983;golgi:25900983;golgi:25900983;golgi:25900983;golgi:25900983;mitochondrion:21896887;peroxisome:19329564;plasma membrane:25641898;plasma membrane:17644812;plasma membrane:19334764;plasma membrane:20843791;plasma membrane:22215637;plasma membrane:26781341;plastid:15028209;plastid:23851315;plastid:20061580;plastid:24361574;vacuole:17151019;vacuol…	0.985054
AT1G23190.1	Phosphoglucomutase/phosphomannomutase family protein;Encodes a cytosolic phosphoglucomutase (PGM). Two Arabidopsis PGM proteins (AT1G70730/PGM2 and AT1G23190/PGM3) have high sequence similarities and redundant functions. Mature plants possessing a single cPGM allele had a major reduction in cPGM activity. Whereas pgm2 and pgm3 single mutants are undistinguishable from the wild type, loss of both …	cytosol	cytosol:15610358	cytosol:21166475;extracellular:26572690;golgi:25900983;golgi:25900983;golgi:25900983;golgi:25900983;golgi:25900983;mitochondrion:27122571;plasma membrane:25641898;plasma membrane:17317660;plasma membrane:17644812;plasma membrane:19334764;plasma membrane:21433285;plasma membrane:22215637;plasma membrane:26781341;plastid:15028209;plastid:20061580;plastid:24361574;vacuole:18686298;vacuole:25900983	1.13987
AT1G23820.1	spermidine synthase 1;Spermidine synthase.	cytosol		cytosol:21166475;extracellular:26572690;mitochondrion:27943495;plasma membrane:21433285	0.656582
AT1G28350.1	Nucleotidylyl transferase superfamily protein;	cytosol			0.630927
AT1G33120.1	Ribosomal protein L6 family;	cytosol	nucleus:15496452	cytosol:21166475;cytosol:15821981;cytosol:22522809;extracellular:26572690;golgi:25900983;golgi:25900983;golgi:25900983;golgi:25900983;golgi:25900983;mitochondrion:21841088;nucleus:15496452;nucleus:23396599;plasma membrane:25641898;plasma membrane:17317660;plasma membrane:19334764;plasma membrane:20843791;plasma membrane:22318864;plasma membrane:26781341;plastid:15028209;vacuole:15215502;vacuole:1…	0.817052
AT1G35580.1	cytosolic invertase 1;Encodes a protein with cytosolic (alkaline/neutral) invertase activity. The protein was shown to interact with PIP5K9.	cytosol		extracellular:26572690;plasma membrane:17317660;plasma membrane:19334764;plasma membrane:26781341;vacuole:15215502;vacuole:23903016	2.4328
AT1G43670.1	Inositol monophosphatase family protein;	cytosol		cytosol:21166475;plasma membrane:25641898;plastid:20061580;vacuole:25900983	0.69659
AT1G47710.1	Serine protease inhibitor (SERPIN) family protein;	cytosol		extracellular:26572690	1.89727
AT1G48170.1	;	cytosol			2.22922
AT1G50110.1	D-aminoacid aminotransferase-like PLP-dependent enzymes superfamily protein;	cytosol	cytosol:12068099;cytosol:25851613		0.870439
AT1G50480.1	10-formyltetrahydrofolate synthetase;10-formyltetrahydrofolate synthetase (THFS) mRNA, complete	cytosol		cytosol:21166475;extracellular:26572690;golgi:25900983;golgi:25900983;golgi:25900983;plasma membrane:25641898;plasma membrane:17317660;plasma membrane:19334764;plasma membrane:21433285;plasma membrane:22215637;plasma membrane:26781341;plastid:19288221;plastid:24361574	1.301
AT1G55090.1	carbon-nitrogen hydrolase family protein;	cytosol		cytosol:21166475	1.89167
AT1G60690.1	NAD(P)-linked oxidoreductase superfamily protein;	cytosol		plasma membrane:17644812;plastid:12938931	1.2346
AT1G60710.1	NAD(P)-linked oxidoreductase superfamily protein;Encodes ATB2.	cytosol		cytosol:21166475	0.615001
AT1G60730.1	NAD(P)-linked oxidoreductase superfamily protein;	cytosol		cytosol:21166475	0.724852
AT1G62820.1	Calcium-binding EF-hand family protein;	cytosol		cytosol:21166475;nucleus:14617066;plasma membrane:22215637;plasma membrane:26781341	1.97845
AT1G66080.1	;	cytosol		cytosol:21166475;extracellular:26572690	1.32892
AT1G70310.1	spermidine synthase 2;Spermidine synthase.	cytosol		extracellular:26572690;plasma membrane:17644812	0.815784
AT1G70730.1	Phosphoglucomutase/phosphomannomutase family protein;Encodes a cytosolic phosphoglucomutase (PGM). Two Arabidopsis PGM proteins (AT1G70730/PGM2 and AT1G23190/PGM3) have high sequence similarities and redundant functions. Mature plants possessing a single cPGM allele had a major reduction in cPGM activity. Whereas pgm2 and pgm3 single mutants are undistinguishable from the wild type, loss of both …	cytosol		cytosol:21166475;extracellular:26572690;plasma membrane:17317660;plasma membrane:17644812;plasma membrane:19334764;plasma membrane:21433285;plasma membrane:22215637;plasma membrane:26781341;plastid:20061580;plastid:24361574	1.28985
AT1G71170.1	6-phosphogluconate dehydrogenase family protein;	cytosol		extracellular:26572690	1.4191
AT1G71750.1	Hypoxanthine-guanine phosphoribosyltransferase;Encodes a protein with hypoxanthine-guanine-phosphoribosyltransferase activity. Unlike some related enzymes, it does not appear to act on xanthine in vitro. The enzyme catalyzes reactions occurring in both directions, but appears to prefer acting on guanine, followed by hypoxanthine, in vitro. The enzyme is likely to function in purine salvage pathwa…	cytosol		cytosol:21166475;extracellular:26572690	4.30843
AT1G72680.1	cinnamyl-alcohol dehydrogenase;	cytosol		cytosol:21166475	1.25625
AT1G76550.1	Phosphofructokinase family protein;	cytosol		cytosol:21166475;golgi:25900983;plasma membrane:19334764	1.56005
AT1G78300.1	general regulatory factor 2;G-box binding factor GF14 omega encoding a 14-3-3 protein	cytosol	cytoskeleton:15659648;cytosol:10737809;cytosol:15659648;cytosol:23512855;nucleus:10737809;nucleus:15659648;nucleus:23512855	cytosol:21166475;extracellular:26572690;golgi:22430844;golgi:25900983;golgi:25900983;golgi:25900983;golgi:25900983;golgi:25900983;nucleus:27177187;peroxisome:19329564;plasma membrane:25641898;plasma membrane:17317660;plasma membrane:22215637;plasma membrane:26781341;plastid:24361574;vacuole:17151019;vacuole:23903016;vacuole:25900983	1.43201
AT1G79260.1	;	cytosol		cytosol:21166475	0.7387
AT1G79690.1	nudix hydrolase homolog 3;	cytosol		cytosol:21166475;extracellular:26572690;vacuole:23903016	2.49078
AT1G80360.1	Pyridoxal phosphate (PLP)-dependent transferases superfamily protein;	cytosol		cytosol:21166475;extracellular:26572690;golgi:25900983;mitochondrion:27943495	0.648894
AT2G01250.1	Ribosomal protein L30/L7 family protein;	cytosol		cytosol:17934214;cytosol:21166475;cytosol:15734919;cytosol:22522809;extracellular:26572690;golgi:25900983;golgi:25900983;golgi:25900983;golgi:25900983;golgi:25900983;nucleus:23396599;plasma membrane:25641898;plasma membrane:17317660;plasma membrane:19334764;plasma membrane:20843791;plasma membrane:22215637;plasma membrane:22318864;plasma membrane:26781341;plastid:15028209;vacuole:15215502;vacuole…	2.13212
AT2G02390.1	glutathione S-transferase zeta 1;Encodes glutathione transferase belonging to the zeta class of GSTs. Naming convention according to Wagner et al. (2002). The protein undergoes spontaneous thiolation following treatment with the oxidant tert-butylhydroperoxide.	cytosol		cytosol:21166475	0.830802
AT2G18230.1	pyrophosphorylase 2;Encodes a protein that might have inorganic pyrophosphatase activity.	cytosol		extracellular:26572690	0.879077
AT2G21270.1	ubiquitin fusion degradation 1;	cytosol		cytosol:21166475;extracellular:26572690;plasma membrane:26781341	0.94349
AT2G22240.1	myo-inositol-1-phosphate synthase 2;** Referred to as MIPS1 in Mitsuhashi et al 2008. Myo-inositol-1-phosphate synthase isoform 2. Expressed in leaf, root and silique. Immunolocalization experiments with an antibody recognizing MIPS1, MIPS2, and MIPS3 showed endosperm localization.	cytosol	cytosol:20215587		1.33821
AT2G22570.1	nicotinamidase 1;encodes a nicotinamidase that converts nicotinamide into nicotinic acid. As such the encoded enzyme is involved in the pyridine nucleotide salvage pathway which may be connected to the de novo NAD biosynthesis through the ABA signaling pathway.	cytosol		extracellular:26572690	1.07522
AT2G27720.1	60S acidic ribosomal protein family;	cytosol		cytosol:17934214;cytosol:18433157;cytosol:21166475;cytosol:15734919;cytosol:15821981;cytosol:22522809;extracellular:26572690;golgi:25900983;nucleus:14617066;nucleus:18433157;plasma membrane:19334764;plasma membrane:26781341	0.927876
AT2G29560.1	cytosolic enolase;Encodes a putative phosphoenolpyruvate enolase that is localized both to the nucleus and the cytoplasm.	cytosol	cytosol:19223001;cytosol:20002588;nucleus:19223001	cytosol:21166475;golgi:25900983;golgi:25900983;golgi:25900983;golgi:25900983;golgi:25900983;mitochondrion:27943495;vacuole:25900983	1.69847
AT2G30860.1	glutathione S-transferase PHI 9;Encodes glutathione transferase belonging to the phi class of GSTs. Naming convention according to Wagner et al. (2002).	cytosol	cytosol:19174456	cytosol:21166475;extracellular:26572690;extracellular:25852701;mitochondrion:27943495;nucleus:24012629;nucleus:27177187;plasma membrane:25641898;plasma membrane:17644812;plasma membrane:19334764;plasma membrane:22215637;plasma membrane:26781341;plastid:14729914;plastid:16648217;plastid:18633119;plastid:20061580;plastid:24361574;vacuole:15539469	1.06609
AT2G34480.1	Ribosomal protein L18ae/LX family protein;	cytosol		cytosol:17934214;cytosol:21166475;cytosol:15734919;cytosol:15821981;cytosol:22522809;extracellular:26572690;golgi:25900983;golgi:25900983;golgi:25900983;golgi:25900983;golgi:25900983;nucleus:27177187;nucleus:23396599;plasma membrane:25641898;plasma membrane:17317660;plasma membrane:19334764;plasma membrane:22215637;plasma membrane:22318864;plasma membrane:26781341;vacuole:17151019;vacuole:25900983	0.627803
AT2G39390.1	Ribosomal L29 family protein ;	cytosol		cytosol:17934214;cytosol:15821981;cytosol:22522809;golgi:25900983;nucleus:23396599;plasma membrane:19334764;plasma membrane:22318864;plasma membrane:26781341;vacuole:23903016	1.04087
AT2G40590.1	Ribosomal protein S26e family protein;	cytosol		cytosol:22522809;plasma membrane:19334764	1.166
AT2G41530.1	S-formylglutathione hydrolase;Encodes a protein with S-formylglutathione hydrolase activity.	cytosol		extracellular:26572690;mitochondrion:27943495;plasma membrane:22215637;plasma membrane:26781341	2.27753
AT2G42600.1	phosphoenolpyruvate carboxylase 2;Encodes one of four Arabidopsis phosphoenolpyruvate carboxylase proteins.	cytosol		golgi:25900983;plasma membrane:25641898;plasma membrane:17317660;plasma membrane:22215637;plasma membrane:24712693;plasma membrane:26781341;plastid:18431481	1.23478
AT2G42690.1	alpha/beta-Hydrolases superfamily protein;	cytosol		plasma membrane:22215637;plastid:15028209	3.62506
AT2G42910.1	Phosphoribosyltransferase family protein;	cytosol	cytosol:15610358	cytosol:21166475;extracellular:26572690;plasma membrane:17317660;plasma membrane:17644812;plasma membrane:26781341;vacuole:23903016	1.29207
AT2G44100.1	guanosine nucleotide diphosphate dissociation inhibitor 1;GDP dissociation inhibitor involved in vesicular membrane traffic	cytosol		cytosol:21166475;golgi:25900983;golgi:25900983;golgi:25900983;plasma membrane:19334764;plasma membrane:22215637;plasma membrane:26781341;vacuole:23903016	1.54109
AT2G44120.1	Ribosomal protein L30/L7 family protein;	cytosol	nucleus:15496452;unclear:15496452	cytoskeleton:24134884;cytosol:17934214;cytosol:21166475;cytosol:15734919;cytosol:15821981;cytosol:22522809;extracellular:26572690;golgi:25900983;golgi:25900983;golgi:25900983;golgi:25900983;golgi:25900983;nucleus:15496452;nucleus:23396599;plasma membrane:19334764;plasma membrane:22215637;plasma membrane:26781341;plastid:15028209;vacuole:15215502;vacuole:23903016;vacuole:25900983	1.78498
AT2G45730.1	eukaryotic initiation factor 3 gamma subunit family protein;	cytosol			1.97866
AT3G02770.1	Ribonuclease E inhibitor RraA/Dimethylmenaquinone methyltransferase;	cytosol	peroxisome:10737809	extracellular:26572690;plasma membrane:25641898;plasma membrane:22215637	3.87287
AT3G04520.1	threonine aldolase 2;Encodes a threonine aldolase, involved in threonine degradation to glycine. Expressed in vascular tissue through out the plant.	cytosol		plastid:23667806;vacuole:15215502	3.82746
AT3G06540.1	Rab escort protein;	cytosol	cytosol:15854662	cytosol:21166475;cytosol:22522809;extracellular:26572690;golgi:25900983	1.1427
AT3G06610.1	DNA-binding enhancer protein-related;	cytosol		cytoskeleton:24134884;cytosol:21166475	1.12744
AT3G07110.1	Ribosomal protein L13 family protein;	cytosol	nucleus:15496452;unclear:15496452	cytosol:17934214;cytosol:15821981;cytosol:22522809;extracellular:26572690;golgi:25900983;golgi:25900983;golgi:25900983;golgi:25900983;golgi:25900983;nucleus:15496452;nucleus:23396599;plasma membrane:25641898;plasma membrane:19334764;plasma membrane:22215637;plasma membrane:26781341;plastid:15028209;vacuole:25900983	1.75915
AT3G09500.1	Ribosomal L29 family protein ;	cytosol		cytosol:17934214;cytosol:22522809;extracellular:26572690;golgi:25900983;golgi:25900983;golgi:25900983;golgi:25900983;golgi:25900983;nucleus:15496452;nucleus:23396599;plasma membrane:25641898;plasma membrane:19334764;plasma membrane:22215637;plasma membrane:22318864;plasma membrane:26781341;vacuole:23903016	1.7184
AT3G09820.1	adenosine kinase 1;Involved in the salvage synthesis of adenylates and methyl recycling	cytosol		cytosol:21166475;extracellular:26572690;golgi:25900983;plasma membrane:25641898;plasma membrane:17317660;plasma membrane:17644812;plasma membrane:19334764;plasma membrane:22215637;plasma membrane:26781341;plastid:15028209;plastid:24361574	2.02532
AT3G10610.1	Ribosomal S17 family protein;	cytosol		cytosol:15821981;cytosol:22522809	2.1211
AT3G10850.1	Metallo-hydrolase/oxidoreductase superfamily protein;glyoxalase II cytoplasmic isozyme (Glx2-2) mRNA, complete	cytosol		cytosol:21166475	0.978897
AT3G12290.1	Amino acid dehydrogenase family protein;	cytosol	cytosol:27291711	cytoskeleton:24134884;cytosol:21166475;extracellular:26572690;plasma membrane:25641898;plasma membrane:15574830;plasma membrane:22215637;plasma membrane:26781341;plastid:18431481	0.717347
AT3G14940.1	phosphoenolpyruvate carboxylase 3;Encodes a cytosolic phosphoenolpyruvate carboxylase (PEPC) that has activity when expressed in E.coli. Its mRNA is most abundantly expressed in roots and siliques. PPC3 belongs to the plant-type PEPC family. It can form an enzymatically active complex with a castor bean ortholog of PPC4, which encodes a bacterial-type PEPC.	cytosol		vacuole:23903016	1.51104
AT3G16990.1	Haem oxygenase-like, multi-helical;	cytosol		extracellular:26572690	0.764598
AT3G17210.1	heat stable protein 1;Encodes a heat stable protein with antimicrobial and antifungal activity.	cytosol		cytosol:21166475;extracellular:26572690;plasma membrane:17644812	1.47301
AT3G18060.1	transducin family protein / WD-40 repeat family protein;	cytosol		cytosol:21166475;plasma membrane:25641898;plasma membrane:26781341	1.43675
AT3G18740.1	Ribosomal protein L7Ae/L30e/S12e/Gadd45 family protein;	cytosol		cytosol:15734919;cytosol:22522809;extracellular:26572690;golgi:25900983;golgi:25900983;golgi:25900983;golgi:25900983;golgi:25900983;nucleus:23396599;vacuole:25900983	1.09272
AT3G23600.1	alpha/beta-Hydrolases superfamily protein;	cytosol	cytosol:15610358;nucleus:15610358	cytosol:21166475;extracellular:26572690;golgi:25900983;golgi:25900983;mitochondrion:27122571;plasma membrane:17644812;plasma membrane:26781341;plastid:24361574	2.20712
AT3G43190.1	sucrose synthase 4;Encodes a protein with sucrose synthase activity (SUS4).	cytosol		cytosol:21166475;plasma membrane:15574830;plasma membrane:17317660;plasma membrane:19334764;plasma membrane:21433285;vacuole:14760709;vacuole:23903016	2.42736
AT3G43600.1	aldehyde oxidase 2;Encodes an aldehyde oxidase. AAO2 does not appear to act on abscisic aldehyde in vitro but it is possible that it may function in abscisic acid biosynthesis when the activity of At2g27150 (AAO3), the primary abscisic aldehyde oxidase, is lost.	cytosol		cytosol:21166475	2.13697
AT3G46970.1	alpha-glucan phosphorylase 2;Encodes a cytosolic alpha-glucan phosphorylase. In vitro, the enzyme has a preference for branched polysaccharides, such as glycogen.	cytosol		cytosol:21166475;nucleus:27177187;nucleus:23396599;plasma membrane:25641898;plasma membrane:21433285;plasma membrane:22215637;plastid:18431481;plastid:24361574	1.8625
AT3G47000.1	Glycosyl hydrolase family protein;	cytosol		cytosol:21166475	2.04934
AT3G51160.1	NAD(P)-binding Rossmann-fold superfamily protein;Catalyzes the first step in the de novo synthesis of GDP-L-fucose.	cytosol		cytosol:21166475;extracellular:26572690;plasma membrane:19334764;plasma membrane:26781341	0.717111
AT3G52390.1	TatD related DNase;	cytosol			0.867235
AT3G53180.1	glutamate-ammonia ligases;catalytics;glutamate-ammonia ligases;	cytosol		cytosol:21166475	0.987874
AT3G53430.1	Ribosomal protein L11 family protein;	cytosol		cytosol:22522809;golgi:25900983;golgi:25900983;golgi:25900983;golgi:25900983;golgi:25900983;plasma membrane:25641898;plasma membrane:22215637;plastid:24872594;vacuole:25900983	3.00103
AT3G53620.1	pyrophosphorylase 4;Encodes a soluble protein with inorganic pyrophosphatase activity that is highly specific for Mg-inorganic pyrophosphate.	cytosol		cytosol:21166475	0.587378
AT3G53870.1	Ribosomal protein S3 family protein;	cytosol		cytosol:17934214;cytosol:15734919;cytosol:15821981;cytosol:22522809;golgi:25900983;golgi:25900983;golgi:25900983;golgi:25900983;golgi:25900983;mitochondrion:27122571;nucleus:23396599;plasma membrane:25641898;plasma membrane:19334764	0.819926
AT3G54440.1	glycoside hydrolase family 2 protein;	cytosol		plastid:18431481	0.784251
AT3G55440.1	triosephosphate isomerase;Encodes triosephosphate isomerase.	cytosol		cytosol:21166475;extracellular:25805245;extracellular:26572690;golgi:25900983;golgi:25900983;golgi:25900983;golgi:25900983;mitochondrion:14671022;mitochondrion:27943495;plasma membrane:25641898;plasma membrane:17317660;plasma membrane:17644812;plasma membrane:19334764;plasma membrane:21433285;plasma membrane:22215637;plasma membrane:22318864;plasma membrane:26781341;plastid:16207701;plastid:20061…	2.63733
AT3G55620.1	Translation initiation factor IF6;	cytosol		cytosol:22522809;extracellular:26572690;golgi:25900983;golgi:25900983;nucleus:15496452;nucleus:23396599;vacuole:25900983	1.15988
AT3G61110.1	ribosomal protein S27;Arabidopsis ribosomal protein	cytosol		cytosol:15734919;cytosol:22522809;golgi:25900983;golgi:25900983;golgi:25900983;golgi:25900983;golgi:25900983;plasma membrane:22318864;vacuole:25900983	1.47628
AT3G62870.1	Ribosomal protein L7Ae/L30e/S12e/Gadd45 family protein;	cytosol		cytosol:17934214;cytosol:21166475;cytosol:15734919;cytosol:15821981;cytosol:22522809;extracellular:26572690;golgi:25900983;golgi:25900983;golgi:25900983;golgi:25900983;golgi:25900983;nucleus:23396599;plasma membrane:25641898;vacuole:17151019;vacuole:23903016;vacuole:25900983	0.910514
AT4G02610.1	Aldolase-type TIM barrel family protein;	cytosol		extracellular:26572690;golgi:25900983	1.48531
AT4G02860.1	Phenazine biosynthesis PhzC/PhzF protein;	cytosol		cytosol:21166475	1.5184
AT4G04040.1	Phosphofructokinase family protein;	cytosol		cytosol:21166475;plasma membrane:26781341	1.14417
AT4G09670.1	Oxidoreductase family protein;	cytosol		cytosol:21166475;plasma membrane:25641898	1.97805
AT4G14570.1	acylaminoacyl-peptidase-related;	cytosol	cytosol:22398639;nucleus:22398639	extracellular:26572690;mitochondrion:27122571;mitochondrion:27943495;plastid:18431481;vacuole:15215502	1.42922
AT4G14930.1	Survival protein SurE-like phosphatase/nucleotidase;	cytosol		cytosol:21166475	1.80529
AT4G15000.1	Ribosomal L27e protein family;	cytosol		cytosol:17934214;cytosol:15734919;cytosol:22522809;extracellular:26572690;golgi:25900983;golgi:25900983;golgi:25900983;golgi:25900983;nucleus:23396599;plasma membrane:25641898;plasma membrane:19334764;plasma membrane:22215637;vacuole:23903016	1.34627
AT4G17260.1	Lactate/malate dehydrogenase family protein;	cytosol		cytosol:21166475;extracellular:15157177;extracellular:26572690;mitochondrion:21841088;plasma membrane:17644812	0.951719
AT4G17830.1	Peptidase M20/M25/M40 family protein;	cytosol		cytosol:21166475;mitochondrion:27122571	2.57863
AT4G18100.1	Ribosomal protein L32e;	cytosol		cytosol:17934214;cytosol:21166475;cytosol:15734919;cytosol:22522809;extracellular:26572690;golgi:25900983;golgi:25900983;golgi:25900983;golgi:25900983;nucleus:15496452;nucleus:23396599;plasma membrane:25641898;plasma membrane:19334764;plasma membrane:22215637;plasma membrane:26781341	1.41048
AT4G21580.1	oxidoreductase, zinc-binding dehydrogenase family protein;	cytosol		cytosol:21166475;extracellular:26572690	1.1231
AT4G32840.1	phosphofructokinase 6;	cytosol		cytosol:21166475;plasma membrane:22318864	1.0956
AT4G33090.1	aminopeptidase M1;encodes an aminopeptidase, a ortholog of mouse microsomal AP (EC 3.4.11.2).	cytosol		cytosol:21166475;extracellular:26572690;golgi:25900983;golgi:25900983;golgi:25900983;golgi:25900983;golgi:25900983;mitochondrion:27122571;plasma membrane:25641898;plasma membrane:17644812;plasma membrane:26781341;plastid:20061580	0.903886
AT4G36130.1	Ribosomal protein L2 family;	cytosol		cytosol:15734919;cytosol:22522809;extracellular:26572690;golgi:25900983;golgi:25900983;golgi:25900983;golgi:25900983;golgi:25900983;nucleus:23396599;plasma membrane:25641898;plasma membrane:17317660;plasma membrane:19334764;vacuole:15215502;vacuole:23903016;vacuole:25900983	1.33586
AT4G39800.1	myo-inositol-1-phosphate synthase 1;** Referred to as MIPS2 in Mitsuhashi et al 2008. myo-inositol-1-phosphate synthase isoform 1.Expressed in leaf, root and silique. Immunolocalization experiments with an antibody recognizing MIPS1, MIPS2, and MIPS3 showed endosperm localization.	cytosol	cytosol:20215587	mitochondrion:27122571	0.971469
AT5G01410.1	Aldolase-type TIM barrel family protein;Encodes a protein predicted to function in tandem with PDX2 to form glutamine amidotransferase complex with involved in vitamin B6 biosynthesis.	cytosol	cytosol:16157873;cytosol:16236150;nucleus:16236150;plasma membrane:16236150;plastid:16236150	cytosol:21166475;golgi:25900983;plasma membrane:26781341;vacuole:23903016	1.26291
AT5G06060.1	NAD(P)-binding Rossmann-fold superfamily protein;	cytosol		cytosol:21166475;extracellular:26572690	1.60124
AT5G08100.1	N-terminal nucleophile aminohydrolases (Ntn hydrolases) superfamily protein;	cytosol		cytosol:21166475	1.36079
AT5G08570.1	Pyruvate kinase family protein;	cytosol		cytosol:21166475;extracellular:26572690;plasma membrane:25641898;vacuole:23903016	0.721275
AT5G10870.1	chorismate mutase 2;Encodes chorismate mutase AtCM2.	cytosol			1.75396
AT5G14600.1	S-adenosyl-L-methionine-dependent methyltransferases superfamily protein;	cytosol			2.35837
AT5G14800.1	pyrroline-5- carboxylate (P5C) reductase;Delta 1-pyrroline-5-carboxylate reductase, catalyzes the final step in proline biosynthesis from glutamate and ornithine.In situ hybridization indicated that under normal growth conditions, the highest concentration of P5CR transcripts occurs in the cortical parenchyma, phloem, vascular cambium and pith parenchyma in the vicinity of the protoxylem. Single …	cytosol	cytosol:23062072	cytoskeleton:24134884;golgi:25900983;golgi:25900983;golgi:25900983;plasma membrane:25641898;vacuole:25900983	0.780366
AT5G16050.1	general regulatory factor 5;Encodes GF14 upsilon chain, a 14-3-3 gene family member.	cytosol		cytosol:21166475;extracellular:26572690;golgi:22430844;golgi:25900983;golgi:25900983;golgi:25900983;mitochondrion:27943495;plasma membrane:25641898;plasma membrane:17317660;plasma membrane:17644812;plasma membrane:22215637;plasma membrane:26781341;plastid:24361574;vacuole:23903016	0.951471
AT5G16760.1	Inositol 1,3,4-trisphosphate 5/6-kinase family protein;Encodes a inositol 1,3,4-trisphosphate 5/6-kinase.	cytosol		cytosol:21166475;extracellular:26572690;golgi:25900983	0.618593
AT5G19550.1	aspartate aminotransferase 2;Nitrogen metabolism. Major cytosolic isoenzyme controlling aspartate biosynthesis in the light.	cytosol	unclear:24130194	cytosol:21166475;golgi:25900983;golgi:25900983;golgi:25900983;golgi:25900983;golgi:25900983;mitochondrion:21841088;mitochondrion:27122571;mitochondrion:27943495;plasma membrane:25641898;plasma membrane:17644812;plasma membrane:19334764;plasma membrane:21433285;plasma membrane:26781341;vacuole:15215502;vacuole:17151019;vacuole:23903016;vacuole:25900983	0.736598
AT5G21060.1	Glyceraldehyde-3-phosphate dehydrogenase-like family protein;	cytosol		cytosol:21166475;extracellular:26572690	0.999468
AT5G21274.1	calmodulin 6;Encodes a calmodulin isoform. Expressed in leaves.	cytosol		mitochondrion:27943495;plastid:24361574	1.1822
AT5G23290.1	prefoldin 5;	cytosol		cytosol:21166475	0.663769
AT5G24760.1	GroES-like zinc-binding dehydrogenase family protein;	cytosol			2.58667
AT5G27470.1	seryl-tRNA synthetase / serine--tRNA ligase;	cytosol		cytosol:21166475;extracellular:26572690;plasma membrane:25641898;plasma membrane:19334764;plastid:24872594	1.05087
AT5G27850.1	Ribosomal protein L18e/L15 superfamily protein;	cytosol		cytosol:17934214;cytosol:21166475;cytosol:15821981;cytosol:22522809;extracellular:26572690;golgi:25900983;golgi:25900983;golgi:25900983;golgi:25900983;golgi:25900983;nucleus:23396599;plasma membrane:25641898;plasma membrane:19334764;plasma membrane:22215637;plasma membrane:26781341;vacuole:15215502;vacuole:23903016;vacuole:25900983	0.872367
AT5G28050.1	Cytidine/deoxycytidylate deaminase family protein;	cytosol		cytosol:21166475;extracellular:26572690	2.22684
AT5G37830.1	oxoprolinase 1;Encodes a 5-oxoprolinase that acts in the glutathione degradation pathway and in 5-oxoproline metabolism.	cytosol		cytosol:21166475;plasma membrane:21433285	2.66815
AT5G40190.1	RNA ligase/cyclic nucleotide phosphodiesterase family protein;Identified in a screen for calmodulin-binding proteins obtained from an auxin treated cDNA library.	cytosol		extracellular:26572690	1.75587
AT5G40370.1	Glutaredoxin family protein;	cytosol	cytosol:26672074	cytosol:21166475;golgi:22430844;mitochondrion:27943495;plasma membrane:17644812;plasma membrane:26781341;plastid:20061580;plastid:24361574	0.675536
AT5G42740.1	Sugar isomerase (SIS) family protein;	cytosol		cytosol:21166475	0.765683
AT5G42980.1	thioredoxin 3;encodes a cytosolic thioredoxin that reduces disulfide bridges of target proteins by the reversible formation of a disulfide bridge between two neighboring Cys residues present in the active site. Thioredoxins have been found to regulate a variety of biological reactions in prokaryotic and eukaryotic cells.	cytosol	cytosol:19329564	cytosol:21166475;extracellular:15593128;extracellular:26572690;golgi:22430844;golgi:25900983;mitochondrion:15276431;nucleus:24012629;peroxisome:19329564;plasma membrane:25641898;plasma membrane:17317660;plasma membrane:17644812;plasma membrane:19334764;plasma membrane:20843791;plasma membrane:21433285;plasma membrane:22215637;plasma membrane:26781341;plastid:16207701;plastid:18431481;plastid:2436…	2.75344
AT5G48480.1	Lactoylglutathione lyase / glyoxalase I family protein;	cytosol		cytosol:21166475;extracellular:26572690	1.21995
AT5G49650.1	xylulose kinase-2;Encodes a cytosolic protein capable of phosphorylating xylulose and deoxy-xylulose. It most likely plays a role in producing precursors for isoprenoid biosynthesis.	cytosol	cytosol:16920870	cytosol:21166475;cytosol:22522809	2.18881
AT5G56350.1	Pyruvate kinase family protein;	cytosol		cytosol:21166475;extracellular:26572690;mitochondrion:27122571;plasma membrane:25641898;vacuole:23903016	1.04475
AT5G56630.1	phosphofructokinase 7;	cytosol		cytosol:21166475;golgi:25900983;golgi:25900983;golgi:25900983;vacuole:25900983	1.17414
AT5G56760.1	serine acetyltransferase 1;1;Encodes a cytosolic serine O-acetyltransferase involved in sulfur assimilation and cysteine biosynthesis. Expressed in the vascular system.	cytosol	cytosol:9830017	cytosol:21166475	0.985332
AT5G57330.1	Galactose mutarotase-like superfamily protein;	cytosol		cytosol:21166475	0.782302
AT5G59290.1	UDP-glucuronic acid decarboxylase 3;Encodes an isoform of UDP-glucuronic acid decarboxylase, which is predicted to be cytosolic by PSORT. This enzyme produces UDP-xylose, which is a substrate for many cell wall carbohydrates including hemicellulose and pectin. UDP-xylose is also known to feedback regulate several cell wall biosynthetic enzymes.	cytosol		cytosol:21166475	0.752649
AT5G63680.1	Pyruvate kinase family protein;	cytosol		cytosol:21166475;extracellular:26572690;golgi:25900983;golgi:25900983;golgi:25900983;plasma membrane:17317660	0.838381
AT5G64250.1	Aldolase-type TIM barrel family protein;	cytosol		cytosol:21166475	0.684272
AT5G64370.1	beta-ureidopropionase;PYD3 encodes a beta-ureidopropionase which, when expressed in E. coli, has been shown to convert beta-ureidopropionate into beta-alanine. It localizes to the cytosol and plays an important role in uracil degradation.	cytosol	cytosol:19413687	cytosol:21166475;extracellular:26572690;plasma membrane:22318864	1.38181
AT5G67510.1	Translation protein SH3-like family protein;	cytosol		cytosol:17934214;cytosol:15734919;cytosol:22522809;extracellular:26572690	1.0577
AT4G13720.1	Inosine triphosphate pyrophosphatase family protein;	cytosol,mitochondrion		golgi:25900983;plastid:21531424	1.31926
AT1G13440.1	glyceraldehyde-3-phosphate dehydrogenase C2;	cytosol,nucleus	cytoskeleton:23316205;cytosol:23316205;cytosol:24130194;cytosol:28444344;mitochondrion:23316205;nucleus:15496452;nucleus:28444344;peroxisome:24130194;unclear:15496452	cytosol:21166475;cytosol:22522809;extracellular:26572690;golgi:25900983;golgi:25900983;golgi:25900983;golgi:25900983;golgi:25900983;mitochondrion:12492832;mitochondrion:14671022;mitochondrion:24727099;mitochondrion:27122571;nucleus:14617066;nucleus:15496452;peroxisome:24130194;plasma membrane:25641898;plasma membrane:15060130;plasma membrane:15574830;plasma membrane:17317660;plasma membrane:19334…	0.66241
AT3G16080.1	Zinc-binding ribosomal protein family protein;	cytosol,nucleus		cytosol:22522809	0.954447
AT4G34555.1	Ribosomal protein S25 family protein;	cytosol,nucleus		cytosol:22522809;cytosol:26232565;nucleus:23396599;plasma membrane:26781341;vacuole:23903016	0.586298
AT3G01520.1	Adenine nucleotide alpha hydrolases-like superfamily protein;	cytosol,plasma membrane		extracellular:26572690;plasma membrane:25641898;plasma membrane:17644812;plasma membrane:19334764;plasma membrane:22215637	1.89101
AT1G15000.1	serine carboxypeptidase-like 50;	extracellular		extracellular:26572690;extracellular:28155257;vacuole:15539469	1.70596
AT1G20225.1	Thioredoxin superfamily protein;	extracellular	cytosol:19027309;plasma membrane:19027309	cytosol:21166475;extracellular:26572690	1.27612
AT1G21680.1	DPP6 N-terminal domain-like protein;	extracellular		extracellular:26572690;extracellular:28155257;vacuole:17151019	0.925396
AT1G71950.1	Proteinase inhibitor, propeptide;	extracellular		cytosol:21166475;extracellular:28155257;plasma membrane:14506206	1.20835
AT2G22970.1	serine carboxypeptidase-like 11;	extracellular		extracellular:26572690;extracellular:28155257	2.25404
AT2G28100.1	alpha-L-fucosidase 1;Encodes a protein with &#945;-fucosidase activity. The activity was assessed on 2'-fucosyl-lactitol. AtFUC1 was not able to act on XXFG substrates, at least when heterologously expressed in <i>Pichia pastoris</i>. The enzyme has been postulated to act on fucosylated substrates other than xyloglucan oligosaccharides. was shown (<i>Pichia pastoris</i>) to hydrolyze fucose in 3-…	extracellular		extracellular:15694452;extracellular:16356755;extracellular:26572690;vacuole:15539469	0.730792
AT2G41800.1	Protein of unknown function, DUF642;	extracellular		extracellular:14595688;extracellular:16287169;extracellular:16356755;extracellular:16729891;extracellular:26572690;golgi:25900983;plasma membrane:19334764;plasma membrane:20843791;plasma membrane:22318864	2.1717
AT3G07470.1	Protein of unknown function, DUF538;	extracellular		extracellular:15694452;extracellular:16356755;extracellular:26572690	1.32568
AT3G12500.1	basic chitinase;encodes a basic chitinase involved in ethylene/jasmonic acid mediated signalling pathway during systemic acquired resistance based on expression analyses.	extracellular		cytosol:21166475;extracellular:15694452;extracellular:16356755;extracellular:18998720;extracellular:26572690;vacuole:15215502;vacuole:17151019	1.0437
AT3G16850.1	Pectin lyase-like superfamily protein;	extracellular		extracellular:16356755;extracellular:16729891;extracellular:19825673;extracellular:21109274;extracellular:26572690;extracellular:28155257;vacuole:15539469	1.10359
AT3G26720.1	Glycosyl hydrolase family 38 protein;	extracellular		extracellular:16356755;extracellular:26572690;extracellular:28155257;vacuole:15215502;vacuole:15539469;vacuole:17151019;vacuole:23903016	0.85813
AT3G55260.1	beta-hexosaminidase 1;Encodes a protein with &#946;-hexosaminidase activity (the enzyme is active with p-nitrophenyl-&#946;-N-acetylglucosaminide as substrate but displayed only a minor activity toward p-nitrophenyl-&#946;-N-acetylgalactosaminide). The enzyme displays no distinct preference for a specific terminal GlcNAc residue and indeed cleaved the asialoagalactodabsylglycopeptide GnGn to a mi…	extracellular		cytosol:21166475;extracellular:16356755;extracellular:16729891;extracellular:21109274;extracellular:26572690;extracellular:28155257;vacuole:15215502;vacuole:15539469;vacuole:23903016	1.22799
AT4G12910.1	serine carboxypeptidase-like 20;	extracellular	cytosol:24130194	extracellular:15694452;extracellular:16356755;extracellular:28155257;peroxisome:24130194;vacuole:15539469	0.59208
AT4G29680.1	Alkaline-phosphatase-like family protein;	extracellular		extracellular:18998720;extracellular:26572690;golgi:25900983;plastid:23667806	0.985595
AT4G31840.1	early nodulin-like protein 15;	extracellular		extracellular:21109274;extracellular:28155257;plasma membrane:25641898;plasma membrane:17317660;plasma membrane:17644812;plasma membrane:20843791;plasma membrane:22318864;plasma membrane:22923678	1.31763
AT4G34180.1	Cyclase family protein;	extracellular		endoplasmic reticulum:22923678;extracellular:14595688;extracellular:15694452;extracellular:16356755;extracellular:18998720;golgi:22430844;plasma membrane:25641898	0.805223
AT5G05340.1	Peroxidase superfamily protein;	extracellular		cytosol:21166475;extracellular:14595688;extracellular:16356755;extracellular:28155257;golgi:22430844	1.83881
AT5G10560.1	Glycosyl hydrolase family protein;	extracellular	vacuole:23738689	extracellular:26572690;extracellular:28155257;vacuole:15539469;vacuole:17151019;vacuole:23903016	0.777382
AT5G15490.1	UDP-glucose 6-dehydrogenase family protein;	extracellular		cytosol:21166475;extracellular:26572690	1.02052
AT5G19860.1	Protein of unknown function, DUF538;	extracellular		extracellular:26572690	1.93021
AT5G67360.1	Subtilase family protein;Encodes a subtilisin-like serine protease essential for mucilage release from seed coats.	extracellular		extracellular:15593128;extracellular:15694452;extracellular:16356755;extracellular:18998720;extracellular:21109274;extracellular:24665109;extracellular:26572690;extracellular:28155257;extracellular:28003327;golgi:25900983;golgi:25900983;golgi:25900983;golgi:25900983;vacuole:25900983	0.867335
AT5G11720.1	Glycosyl hydrolases family 31 protein;	extracellular,plasma membrane		extracellular:26572690;extracellular:28155257;plasma membrane:19334764;plasma membrane:21433285;vacuole:15215502;vacuole:15539469	0.918696
AT1G69800.1	Cystathionine beta-synthase (CBS) protein;	golgi		golgi:25900983;golgi:25900983	1.70498
AT3G05000.1	Transport protein particle (TRAPP) component;	golgi		golgi:25900983;golgi:21826108;plasma membrane:19334764;vacuole:25900983	1.6311
AT3G14990.1	Class I glutamine amidotransferase-like superfamily protein;	golgi		cytosol:21166475;extracellular:26572690;golgi:25900983;golgi:25900983;golgi:25900983;golgi:25900983;golgi:25900983;mitochondrion:27122571;plasma membrane:17644812;vacuole:17151019;vacuole:25900983	0.838872
AT1G06570.1	phytoene desaturation 1;Mutation of the PDS1 locus disrupts the activity of p-hydroxyphenylpyruvate dioxygenase (HPPDase), the first committed step in the synthesis of both plastoquinone and tocopherols in plants.	mitochondrion		mitochondrion:14671022;mitochondrion:27122571	0.791807
AT1G15120.1	Ubiquinol-cytochrome C reductase hinge protein;	mitochondrion		mitochondrion:15276431;mitochondrion:21841088;mitochondrion:27122571;mitochondrion:27943495	2.64619
AT1G52160.1	tRNAse Z3;Encodes a tRNase Z.	mitochondrion			0.738428
AT3G23490.1	cyanase;cyanase	mitochondrion		cytosol:21166475;mitochondrion:27943495	1.38939
AT4G29120.1	6-phosphogluconate dehydrogenase family protein;	mitochondrion		cytosol:21166475;extracellular:26572690;mitochondrion:21841088;mitochondrion:27943495	1.21694
AT5G15810.1	N2,N2-dimethylguanosine tRNA methyltransferase;	mitochondrion			3.3844
AT5G61510.1	GroES-like zinc-binding alcohol dehydrogenase family protein;	mitochondrion		cytosol:21166475;mitochondrion:27122571;plasma membrane:15574830	2.2182
AT1G03330.1	Small nuclear ribonucleoprotein family protein;	nucleus		cytosol:21166475;extracellular:26572690	1.2402
AT1G03350.1	BSD domain-containing protein;	nucleus			1.41387
AT1G07990.1	SIT4 phosphatase-associated family protein;	nucleus			0.952274
AT1G08780.1	ABI3-interacting protein 3;	nucleus		cytosol:21166475	3.15741
AT1G19130.1	;	nucleus	nucleus:18643965	cytosol:21166475	1.35053
AT1G31340.1	related to ubiquitin 1;Encodes a ubiquitin-related protein that is conjugated to target proteins by neddylation. It has been shown to be conjugated to the cullin AtCUL1. The RUB-conjugation pathway has been implicated in in auxin response.	nucleus		cytosol:21166475;extracellular:26572690;nucleus:23396599;plasma membrane:17644812;plastid:24361574	1.75493
AT1G35780.1	;	nucleus		cytoskeleton:24134884	0.933812
AT1G47200.1	WPP domain protein 2;WPP family members contains an NE targeting domain. This domain, called the WPP domain after a highly conserved Trp-Pro-Pro motif, is necessary for NE targeting of WPP1. RNAi suppression of WPP2 resulted in reduced mitotic activity.	nucleus	nucleus:15548735	cytoskeleton:24134884;cytosol:21166475;plasma membrane:17317660;plasma membrane:26781341	0.998787
AT1G78150.1	;	nucleus			1.78614
AT2G16780.1	Transducin family protein / WD-40 repeat family protein;Encodes a WD-40 repeat protein similar to yeast MSI1.	nucleus		cytosol:21166475	1.3545
AT2G22400.1	S-adenosyl-L-methionine-dependent methyltransferases superfamily protein;	nucleus		mitochondrion:27122571	0.751451
AT2G24940.1	membrane-associated progesterone binding protein 2;	nucleus		cytosol:21166475;plasma membrane:26781341;plastid:24361574	2.97068
AT2G25950.1	Protein of unknown function (DUF1000);	nucleus		extracellular:26572690	0.730508
AT2G33840.1	Tyrosyl-tRNA synthetase, class Ib, bacterial/mitochondrial;	nucleus		extracellular:26572690	1.80993
AT3G05900.1	neurofilament protein-related;	nucleus		mitochondrion:21841088;plasma membrane:22215637;plasma membrane:24397334;plasma membrane:26781341;plastid:20423899;plastid:24361574;vacuole:18686298	1.50772
AT4G11740.1	Ubiquitin-like superfamily protein;Isolated as a suppressor of a dominant mutant in the Ara4 gene that was expressed in yeast ypt1 mutant strains. A novel protein with a small region of similarity to coil-coiled domain of yeast VSP27 protein.	nucleus		cytosol:18433157;nucleus:18433157	0.642538
AT4G15790.1	;	nucleus			2.26198
AT4G26840.1	small ubiquitin-like modifier 1;Encodes a small ubiquitin-like modifier (SUMO) polypeptide that becomes covalently attached to various intracellular protein targets, much like ubiquitination, leading to post-translational modification of those targets.	nucleus		cytosol:21166475;extracellular:26572690;nucleus:23396599	2.27077
AT5G02770.1	;	nucleus			1.1342
AT5G13310.1	;	nucleus			0.671416
AT5G14540.1	Protein of unknown function (DUF1421);	nucleus		cytosol:21166475	2.20732
AT5G49980.1	auxin F-box protein 5;	nucleus			2.56227
AT5G52200.1	phosphoprotein phosphatase inhibitors;	nucleus			0.596558
AT5G55160.1	small ubiquitin-like modifier 2;Encodes a small ubiquitin-like modifier (SUMO) polypeptide that becomes covalently attached to various intracellular protein targets, much like ubiquitination, leading to post-translational modification of those targets. SUMO2 can form SUMO chains through lysine residue 10 during in vitro assays.	nucleus		extracellular:26572690	1.06961
AT1G19570.1	dehydroascorbate reductase;Encodes a member of the dehydroascorbate reductase gene family. Critical for a mutualistic symbiosis between the host Arabidopsis and the root colonizing fungus Piriformospora indica.	peroxisome	cytosol:20735773;cytosol:28381499;peroxisome:19329564	cytosol:21166475;extracellular:26572690;mitochondrion:12954611;peroxisome:19329564;plasma membrane:17644812;plasma membrane:22215637;plasma membrane:26781341;plastid:16207701;plastid:24361574	1.71169
AT2G17420.1	NADPH-dependent thioredoxin reductase A;NADPH-dependent thioredoxin reductase, major cytosolic isoform	peroxisome		cytosol:21166475;extracellular:18998720;extracellular:26572690;mitochondrion:27943495;peroxisome:18931141;plasma membrane:26781341	2.13409
AT5G48230.1	acetoacetyl-CoA thiolase 2;	peroxisome	cytosol:17120136	cytosol:21166475;extracellular:26572690;peroxisome:17951448;peroxisome:19329564;plasma membrane:17644812;plasma membrane:26781341	0.787405
AT2G20760.1	Clathrin light chain protein;	plasma membrane	golgi:23424247;plasma membrane:23424247	cytosol:21166475;golgi:25900983;golgi:25900983;golgi:25900983;plasma membrane:25641898;plasma membrane:17317660;plasma membrane:19334764;plasma membrane:26781341	2.34273
AT2G25060.1	early nodulin-like protein 14;	plasma membrane		extracellular:16356755;extracellular:28155257;plasma membrane:25641898;plasma membrane:12805588;plasma membrane:16602701;plasma membrane:17317660;plasma membrane:17644812;plasma membrane:21433285;plasma membrane:22318864;plasma membrane:22923678	1.14529
AT2G30930.1	;	plasma membrane		golgi:25900983;golgi:25900983;golgi:25900983;plasma membrane:25641898;plasma membrane:15060130;plasma membrane:15574830;plasma membrane:17644812;plasma membrane:19334764;plasma membrane:22215637;plasma membrane:26781341;plastid:18431481;plastid:20061580;vacuole:25900983	2.18675
AT2G45820.1	Remorin family protein;	plasma membrane		golgi:25900983;golgi:25900983;golgi:25900983;golgi:25900983;plasma membrane:25641898;plasma membrane:14506206;plasma membrane:15060130;plasma membrane:15308754;plasma membrane:15574830;plasma membrane:16635983;plasma membrane:17317660;plasma membrane:17644812;plasma membrane:19334764;plasma membrane:20374526;plasma membrane:20843791;plasma membrane:22215637;plasma membrane:22318864;plasma membran…	0.706564
AT3G02720.1	Class I glutamine amidotransferase-like superfamily protein;	plasma membrane			0.994676
AT5G54500.1	flavodoxin-like quinone reductase 1;Encodes a flavin mononucleotide-binding flavodoxin-like quinone reductase that is a primary auxin-response gene.	plasma membrane		extracellular:26572690;golgi:25900983;golgi:25900983;golgi:25900983;golgi:25900983;golgi:25900983;peroxisome:19329564;plasma membrane:25641898;plasma membrane:15060130;plasma membrane:16635983;plasma membrane:17317660;plasma membrane:17644812;plasma membrane:19334764;plasma membrane:20843791;plasma membrane:22215637;plasma membrane:22318864;plasma membrane:22923678;plasma membrane:26781341;vacuol…	1.18265
AT1G15500.1	TLC ATP/ADP transporter;	plastid	unclear:15610358	golgi:25900983;golgi:25900983;golgi:25900983;golgi:25900983;mitochondrion:27943495;mitochondrion:21896887;plasma membrane:19334764;plasma membrane:21433285;plastid:22923678;plastid:18431481;plastid:20061580;plastid:24872594;unclear:16618929;vacuole:25900983	0.680247
AT1G15710.1	prephenate dehydrogenase family protein;	plastid	plastid:19136569	golgi:25900983;golgi:25900983;plastid:18431481	1.02607
AT1G20020.1	ferredoxin-NADP(+)-oxidoreductase 2;Encodes a leaf-type ferredoxin:NADP(H) oxidoreductase. It is present in both chloroplast stroma and thylakoid membranes but is more abundant in the stroma	plastid		golgi:25900983;golgi:25900983;golgi:25900983;mitochondrion:27122571;nucleus:23396599;plastid:14729914;plastid:15028209;plastid:15322131;plastid:16207701;plastid:16648217;plastid:20423899;plastid:21531424;plastid:23549413;plastid:23851315;plastid:25740923;plastid:23390424;plastid:18633119;plastid:20061580;plastid:21539947;plastid:24361574;plastid:24872594;plastid:18431481;plastid:20061580;plastid:…	2.08064
AT1G31190.1	myo-inositol monophosphatase like 1;Encodes a myo-inositol monophosphatase IMPL1 (myo-Inositol monophosphatase like 1).	plastid		cytosol:21166475;golgi:25900983;plastid:16207701;plastid:20423899;plastid:21531424;plastid:23851315;plastid:18431481;plastid:18633119;plastid:20061580;plastid:24361574	1.83571
AT1G32060.1	phosphoribulokinase;	plastid	cytosol:24130194	mitochondrion:27122571;mitochondrion:27943495;nucleus:23396599;plasma membrane:25641898;plasma membrane:19334764;plastid:12938931;plastid:15028209;plastid:15322131;plastid:16207701;plastid:16648217;plastid:20423899;plastid:21531424;plastid:23851315;plastid:25740923;plastid:16923014;plastid:18431481;plastid:18433418;plastid:18633119;plastid:20061580;plastid:21539947;plastid:24361574;plastid:248725…	1.89747
AT1G32500.1	non-intrinsic ABC protein 6;Encodes a member of a heterogenous group of non-intrinsic ATP-binding cassette (ABC) proteins. Members of this group bear no close resemblance to each other nor to representatives of specific ABC protein subfamilies from other organisms. This grouping is arbitrary and will likely change upon acquisition of further data.	plastid		golgi:25900983;golgi:25900983;golgi:25900983;golgi:25900983;golgi:25900983;plastid:21531424;plastid:23851315;plastid:20061580;plastid:24361574;vacuole:25900983	1.34881
AT1G50170.1	sirohydrochlorin ferrochelatase B;encodes sirohydrochlorin ferrochelatase catalyzing the last step of the siroheme biosynthesis	plastid	plastid:15545265	extracellular:26572690;plastid:18431481;plastid:24361574	1.06863
AT1G67090.1	ribulose bisphosphate carboxylase small chain 1A;	plastid	peroxisome:10737809;plastid:14688290;plastid:16299174	extracellular:26572690;golgi:25900983;mitochondrion:27943495;nucleus:27177187;nucleus:23396599;plasma membrane:25641898;plasma membrane:19334764;plasma membrane:22215637;plasma membrane:26781341;plastid:11719511;plastid:11826309;plastid:12766230;plastid:12938931;plastid:14729914;plastid:15028209;plastid:15322131;plastid:16207701;plastid:16648217;plastid:19288221;plastid:20423899;plastid:21531424;…	0.628351
AT1G67280.1	Glyoxalase/Bleomycin resistance protein/Dioxygenase superfamily protein;	plastid		extracellular:26572690;golgi:25900983;plastid:11719511;plastid:16207701;plastid:16648217;plastid:20423899;plastid:21531424;plastid:16923014;plastid:18431481;plastid:18633119;plastid:20061580;plastid:21539947;plastid:24361574;plastid:24872594;plastid:18431481	1.28581
AT1G69370.1	chorismate mutase 3;Encodes chorismate mutase 3 (CM3).	plastid			1.11682
AT2G04700.1	ferredoxin thioredoxin reductase catalytic beta chain family protein;	plastid		plastid:20061580;plastid:20061580;plastid:24361574	1.21036
AT2G15570.1	Thioredoxin superfamily protein;chloroplast protein similar to prokaryotic thioredoxin.	plastid	plastid:12707279	extracellular:26572690;plastid:24361574	0.689025
AT2G20690.1	lumazine-binding family protein;A synthetic gene encoding the catalytic domain of the Arabidopsis thaliana gene At2g20690 was recombinant expressed in E. coli demonstrating the molecular function of riboflavin synthase.	plastid	plastid:23203051	plastid:18431481;plastid:21531424;plastid:20061580;plastid:21539947;plastid:24361574	1.4092
AT2G28000.1	chaperonin-60alpha;Encodes chaperonin-60 alpha, a molecular chaperone involved in Rubisco folding. Mutants display aberrant chloroplast and embryo development.	plastid	plastid:19036033	golgi:25900983;golgi:25900983;golgi:25900983;golgi:25900983;golgi:25900983;mitochondrion:11743115;mitochondrion:14671022;mitochondrion:17137349;mitochondrion:18385124;mitochondrion:21472856;mitochondrion:27943495;nucleus:23396599;plasma membrane:25641898;plasma membrane:19334764;plasma membrane:21433285;plasma membrane:22318864;plasma membrane:26781341;plastid:11826309;plastid:12938931;plastid:14…	0.993192
AT2G35450.1	catalytics;hydrolases;	plastid		plastid:20423899;plastid:18431481;plastid:24361574	2.76456
AT2G35490.1	Plastid-lipid associated protein PAP / fibrillin family protein;	plastid		golgi:25900983;golgi:25900983;golgi:25900983;plastid:11826309;plastid:14729914;plastid:15028209;plastid:15322131;plastid:16648217;plastid:21531424;plastid:22923678;plastid:23549413;plastid:23851315;plastid:23390424;plastid:18431481;plastid:24361574;plastid:16414959;plastid:16461379;plastid:22274653;plastid:18431481;plastid:20061580;plastid:24872594;vacuole:25900983	1.30211
AT2G39020.1	Acyl-CoA N-acyltransferases (NAT) superfamily protein;	plastid		extracellular:26572690;plasma membrane:25641898;plastid:15028209	1.59346
AT3G04790.1	Ribose 5-phosphate isomerase, type A protein;	plastid		extracellular:26572690;golgi:25900983;golgi:25900983;golgi:25900983;golgi:25900983;golgi:25900983;mitochondrion:27943495;plasma membrane:19334764;plastid:12938931;plastid:15028209;plastid:15322131;plastid:16207701;plastid:16648217;plastid:20423899;plastid:21531424;plastid:23851315;plastid:25740923;plastid:18431481;plastid:18633119;plastid:20061580;plastid:21539947;plastid:24361574;plastid:2487259…	0.822044
AT3G06350.1	dehydroquinate dehydratase, putative / shikimate dehydrogenase, putative;	plastid		golgi:25900983;mitochondrion:27943495;plastid:18431481;plastid:21531424;plastid:23851315;plastid:18633119;plastid:20061580;plastid:24361574;plastid:24872594	1.79914
AT3G15360.1	thioredoxin M-type 4;encodes a prokaryotic thioredoxin	plastid		extracellular:15593128;extracellular:26572690;plastid:11826309;plastid:12938931;plastid:14729914;plastid:15028209;plastid:16648217;plastid:20423899;plastid:21531424;plastid:20061580;plastid:24872594;plastid:18431481;plastid:20061580;plastid:21539947;plastid:24361574;plastid:24872594;plastid:18431481;plastid:24872594	0.680118
AT3G16950.1	lipoamide dehydrogenase 1;encodes a plastid lipoamide dehydrogenase, subunit of the pyruvate dehydrogenase complex which provides acetyl-CoA for de novo fatty acid biosynthesis. The gene is highly expressed in developing seeds.	plastid	nucleus:15496452	extracellular:26572690;nucleus:15496452;nucleus:23396599;plasma membrane:19334764;plastid:12938931;plastid:15028209;plastid:20423899;plastid:21531424;plastid:23851315;plastid:20061580;plastid:20061580	2.74818
AT3G23400.1	Plastid-lipid associated protein PAP / fibrillin family protein;	plastid	plastid:16414959	golgi:25900983;golgi:25900983;golgi:25900983;golgi:25900983;golgi:25900983;mitochondrion:27943495;nucleus:14617066;plasma membrane:25641898;plasma membrane:16618929;plasma membrane:19334764;plasma membrane:22923678;plastid:11719511;plastid:11826309;plastid:14729914;plastid:15028209;plastid:15322131;plastid:16648217;plastid:20423899;plastid:21531424;plastid:23549413;plastid:23851315;plastid:200615…	0.664587
AT3G27850.1	ribosomal protein L12-C;50S ribosomal protein L12-C	plastid		mitochondrion:27943495;plasma membrane:25641898;plastid:11826309;plastid:14729914;plastid:15028209;plastid:15322131;plastid:16648217;plastid:20423899;plastid:21531424;plastid:24872594;plastid:26987276;plastid:18633119;plastid:24361574	0.871825
AT3G29200.1	chorismate mutase 1;L-ascorbate peroxidase	plastid			1.21003
AT3G55800.1	sedoheptulose-bisphosphatase;Encodes the chloroplast enzyme sedoheptulose-1,7-bisphosphatase (SBPase), involved in the carbon reduction of the Calvin cycle. Increase in SBPase activity in transgenic lines accumulate up to 50% more sucrose and starch than wild-type.	plastid		golgi:25900983;nucleus:27177187;plasma membrane:25641898;plastid:12938931;plastid:15028209;plastid:16207701;plastid:16648217;plastid:20423899;plastid:21531424;plastid:23851315;plastid:26987276;plastid:18431481;plastid:18433418;plastid:18633119;plastid:20061580;plastid:21539947;plastid:24361574;plastid:24872594	1.32467
AT3G60750.1	Transketolase;	plastid		extracellular:26572690;extracellular:25852701;golgi:25900983;golgi:25900983;golgi:25900983;golgi:25900983;golgi:25900983;mitochondrion:27943495;plasma membrane:25641898;plasma membrane:19334764;plasma membrane:21433285;plasma membrane:22215637;plasma membrane:26781341;plastid:15028209;plastid:16207701;plastid:20423899;plastid:21531424;plastid:22923678;plastid:23851315;plastid:25740923;plastid:184…	0.698158
AT3G60880.1	dihydrodipicolinate synthase 1;Encodes a dihydropicolinate synthase involved in lysine biosynthesis. The enzyme is allosterically inhibited by lysine. It is predicted to localize to the cholorplast.	plastid		plastid:24361574	1.24073
AT3G63170.1	Chalcone-flavanone isomerase family protein;	plastid		golgi:25900983;golgi:25900983;mitochondrion:27943495;plastid:12938931;plastid:20423899;plastid:21531424;plastid:22923678;plastid:20061580;plastid:24872594;plastid:18431481;plastid:24361574;unclear:16618929;vacuole:25900983	1.80118
AT4G05390.1	root FNR 1;Encodes a root-type ferredoxin:NADP(H) oxidoreductase.	plastid		extracellular:26572690;plastid:21531424;plastid:20061580;plastid:24361574	0.710614
AT4G08790.1	Nitrilase/cyanide hydratase and apolipoprotein N-acyltransferase family protein;	plastid	plastid:21908688	extracellular:26572690;mitochondrion:27943495	2.15356
AT4G12060.1	Double Clp-N motif protein;	plastid	plastid:in house	golgi:25900983;golgi:25900983;golgi:25900983;golgi:25900983;plastid:12938931;plastid:16207701;plastid:20423899;plastid:21531424;plastid:20061580;plastid:24872594;plastid:18431481;plastid:18633119;plastid:20061580;plastid:21539947;plastid:24361574;plastid:24872594;plastid:18431481	0.818811
AT4G16155.1	dihydrolipoyl dehydrogenases;	plastid	plastid:11575725	golgi:25900983;golgi:25900983;golgi:25900983;golgi:25900983;golgi:25900983;mitochondrion:27122571;mitochondrion:27943495;nucleus:23396599;plasma membrane:25641898;plasma membrane:21433285;plasma membrane:22318864;plastid:12938931;plastid:15028209;plastid:18431481;plastid:20423899;plastid:21531424;plastid:23851315;plastid:20061580;plastid:23390424;plastid:24872594;plastid:20061580;plastid:24872594	1.14083
AT4G18440.1	L-Aspartase-like family protein;	plastid		plastid:16207701;plastid:20423899;plastid:21531424;plastid:23851315;plastid:18431481;plastid:18633119;plastid:20061580;plastid:24361574;plastid:24872594	1.08249
AT4G20850.1	tripeptidyl peptidase ii;Tripeptidyl Peptidase II. Ser protease that assembles into a large oligomeric complex containing two proteins of 153 and 142 kD that are derived from a single TPP2 gene, with the smaller version missing part of the C-terminal end. Not essential, based on the lack of phenotype of a T-DNA disruption mutant.	plastid		extracellular:26572690;golgi:25900983;golgi:25900983;golgi:25900983;golgi:25900983;golgi:25900983;mitochondrion:27122571;mitochondrion:27943495;nucleus:27177187;plasma membrane:25641898;plasma membrane:19334764;plasma membrane:21433285;plastid:15028209;plastid:20423899;plastid:21531424;plastid:18431481;plastid:20061580;plastid:24361574;plastid:24872594;vacuole:15215502;vacuole:15539469;vacuole:17…	1.89135
AT4G22240.1	Plastid-lipid associated protein PAP / fibrillin family protein;	plastid		mitochondrion:27122571;plastid:11719511;plastid:11826309;plastid:14729914;plastid:15028209;plastid:15322131;plastid:16648217;plastid:20423899;plastid:21531424;plastid:18431481;plastid:24361574;plastid:16414959;plastid:16461379;plastid:22274653;plastid:18431481;plastid:20061580;plastid:24872594	1.74584
AT4G27070.1	tryptophan synthase beta-subunit 2;Tryptophan synthase beta. Expressed at low levels in all tissues.	plastid		mitochondrion:21841088;plastid:23851315;plastid:20061580;plastid:20061580	0.963
AT4G34200.1	D-3-phosphoglycerate dehydrogenase;	plastid	cytosol:24130194;plastid:in house	extracellular:26572690;golgi:25900983;golgi:25900983;golgi:25900983;golgi:25900983;golgi:25900983;mitochondrion:14671022;mitochondrion:17137349;mitochondrion:27122571;mitochondrion:27943495;mitochondrion:21896887;plasma membrane:19334764;plasma membrane:21433285;plastid:18431481;plastid:20423899;plastid:21531424;plastid:22923678;plastid:20061580;plastid:21539947;plastid:24361574;plastid:24872594;…	0.978856
AT4G36910.1	Cystathionine beta-synthase (CBS) family protein;Has a cystathionine Beta-synthase domain.	plastid		plastid:18431481	0.707191
AT5G04590.1	sulfite reductase;A.thaliana gene encoding sulfite reductase.	plastid		extracellular:26572690;mitochondrion:27943495;plasma membrane:19334764;plastid:12938931;plastid:15028209;plastid:20423899;plastid:21531424;plastid:23851315;plastid:26987276;plastid:16923014;plastid:18431481;plastid:18433418;plastid:18633119;plastid:20061580;plastid:24361574;plastid:24872594	1.29712
AT5G06290.1	2-cysteine peroxiredoxin B;Encodes a 2-Cys peroxiredoxin (2-Cys PrxB) that contains two catalytic Cys residues.	plastid		plastid:15028209;plastid:16207701;plastid:20423899;plastid:21531424;plastid:23851315;plastid:16923014;plastid:18431481;plastid:18633119;plastid:20061580;plastid:24361574;plastid:24872594	1.3207
AT5G08280.1	hydroxymethylbilane synthase;Encodes a protein with porphobilinogen deaminase activity. This protein is targeted to the chloroplast.	plastid		golgi:25900983;golgi:25900983;golgi:25900983;golgi:25900983;golgi:25900983;plastid:12938931;plastid:16207701;plastid:20423899;plastid:21531424;plastid:23851315;plastid:18431481;plastid:18633119;plastid:20061580;plastid:23549413;plastid:24361574;plastid:24872594;vacuole:25900983	3.33521
AT5G12470.1	Protein of unknown function (DUF3411);	plastid		golgi:25900983;golgi:25900983;golgi:25900983;golgi:25900983;mitochondrion:27943495;plasma membrane:25641898;plasma membrane:19334764;plastid:12766230;plastid:12938931;plastid:15028209;plastid:21531424;plastid:22923678;plastid:23851315;plastid:18431481;plastid:20061580;plastid:24872594;unclear:16618929;vacuole:25900983	1.35314
AT5G20070.1	nudix hydrolase homolog 19;	plastid	plastid:18815383	cytosol:21166475	1.12563
AT5G23440.1	ferredoxin/thioredoxin reductase subunit A (variable subunit) 1;	plastid		plastid:18431481;plastid:24361574	0.994927
AT5G42960.1	;	plastid		golgi:25900983;golgi:25900983;golgi:25900983;mitochondrion:21896887;plasma membrane:19334764;plastid:12938931;plastid:15028209;plastid:22923678;plastid:18431481;plastid:20061580;plastid:24872594;unclear:16618929	0.97488
AT5G60600.1	4-hydroxy-3-methylbut-2-enyl diphosphate synthase;Encodes a chloroplast-localized hydroxy-2-methyl-2-(E)-butenyl 4-diphosphate (HMBPP) synthase (HDS), catalyzes the formation of HMBPP from 2-C-methyl-D-erythrytol 2,4-cyclodiphosphate (MEcPP). The HDS enzyme controls the penultimate steps of the biosynthesis of IPP and dimethylallyl diphosphate (DMAPP) via the MEP pathway and may serve as a metabo…	plastid		golgi:25900983;golgi:25900983;mitochondrion:27122571;plastid:12938931;plastid:15028209;plastid:16207701;plastid:20423899;plastid:21531424;plastid:23851315;plastid:18431481;plastid:18633119;plastid:20061580;plastid:24361574	0.905579
ATCG00670.1	plastid-encoded CLP P;Encodes the only ClpP (caseinolytic protease) encoded within the plastid genome. Contains a highly conserved catalytic triad of Ser-type proteases (Ser-His-Asp). Part of the 350 kDa chloroplast Clp complex. The name reflects nomenclature described in Adam et. al (2001).	plastid		extracellular:26572690;plastid:11278690;plastid:15028209;plastid:16207701;plastid:20423899;plastid:21531424;plastid:20061580;plastid:24872594;plastid:18431481;plastid:18633119;plastid:20061580;plastid:24361574;plastid:24872594;plastid:18431481	1.49034
AT1G09010.1	glycoside hydrolase family 2 protein;	vacuole		extracellular:26572690;extracellular:28155257;vacuole:15539469;vacuole:23903016	0.663579
AT3G61540.1	alpha/beta-Hydrolases superfamily protein;	vacuole		cytosol:21166475;extracellular:26572690;mitochondrion:27943495;plastid:20061580;vacuole:15215502;vacuole:23903016	1.86953
AT4G29260.1	HAD superfamily, subfamily IIIB acid phosphatase ;	vacuole		cytosol:21166475;vacuole:17151019	1.90828
AT5G06730.1	Peroxidase superfamily protein;	vacuole		vacuole:17151019	2.55988
AT5G20500.1	Glutaredoxin family protein;	vacuole	vacuole:23738689	endoplasmic reticulum:22923678;extracellular:26572690;golgi:22430844;plasma membrane:19334764;plasma membrane:26781341	3.86345
AT5G60160.1	Zn-dependent exopeptidases superfamily protein;	vacuole		cytosol:21166475;extracellular:26572690;vacuole:15215502;vacuole:17151019;vacuole:23903016	1.13854
AT1G12840.1	vacuolar ATP synthase subunit C (VATC) / V-ATPase C subunit / vacuolar proton pump C subunit (DET3);Encodes subunit C of the vacuolar H(+)-ATPase (V-ATPase). Bound and phosphorylated by AtWNK8.	vacuole,golgi		extracellular:26572690;golgi:22430844;golgi:25900983;golgi:25900983;golgi:25900983;golgi:25900983;golgi:21826108;golgi:25900983;plasma membrane:25641898;plasma membrane:17644812;plasma membrane:19334764;plasma membrane:20843791;plasma membrane:22215637;plasma membrane:26781341;plastid:24872594;plastid:20061580;vacuole:14760709;vacuole:15215502;vacuole:15539469;vacuole:16618929;vacuole:17151019;va…	1.2633
