# Supplementary material for: The boundary of life and death: changes in mitochondrial and cytosolic proteomes associated with programmed cell death of Arabidopsis thaliana suspension culture cells
Source: Front Plant Sci. 2023 Aug 1;14:1194866. doi: 10.3389/fpls.2023.1194866 (PMC10431908; doi:10.3389/fpls.2023.1194866)
Supplement: Supplementary file 7 [file Table_6.xlsx]

## Sheet: Sup Tab 6a
Supplemental Table S6A: Proteins downregulated in the cytosol after HS (FDR 0.05).
Red font: Proteins upregulated in the mitochondrial fraction after HS (n=1026)
Green highlight: Not downregulated in presence of LaCl3 (n=109)
Protein Properties		Location Consensus	Location Experiments
Gene	Description	Location SUBAcon	Location GFP	Location Mass Spec
AT1G01090	pyruvate dehydrogenase E1 alpha;pyruvate dehydrogenase E1 alpha subunit	plastid		extracellular:26572690;golgi:25900983;golgi:25900983;mitochondrion:27122571;mitochondrion:27943495;plasma membrane:25641898;plastid:12938931;plastid:20423899;plastid:21531424;plastid:26987276;plastid:18431481;plastid:20061580;plastid:24872594;plastid:20061580;plastid:24361574;plastid:24872594;vacuole:25900983
AT1G01300	Eukaryotic aspartyl protease family protein;	extracellular		extracellular:16287169;extracellular:26572690;extracellular:28155257;plasma membrane:19334764;plasma membrane:21433285;vacuole:25900983
AT1G01910	P-loop containing nucleoside triphosphate hydrolases superfamily protein;	golgi		golgi:25900983;golgi:25900983;golgi:25900983;golgi:25900983;mitochondrion:27943495;plasma membrane:22215637;plasma membrane:26781341;vacuole:25900983
AT1G01940	Cyclophilin-like peptidyl-prolyl cis-trans isomerase family protein;	cytosol		extracellular:26572690
AT1G01960	SEC7-like guanine nucleotide exchange family protein;	cytosol		cytoskeleton:24134884;cytosol:18433157;cytosol:21166475;golgi:25900983;golgi:25900983;golgi:25900983;golgi:25900983;golgi:25900983;nucleus:18433157;plasma membrane:19334764;vacuole:25900983
AT1G02080	transcription regulators;	golgi		cytosol:21166475;golgi:25900983;golgi:25900983;golgi:25900983;golgi:25900983;golgi:25900983;plasma membrane:19334764;plasma membrane:21433285;plasma membrane:22318864;vacuole:25900983
AT1G02140	mago nashi family protein;	nucleus	nucleus:15496452;nucleus:16953428	extracellular:26572690;nucleus:15496452;nucleus:23396599;plastid:15028209
AT1G02305	Cysteine proteinases superfamily protein;	extracellular		extracellular:26572690;extracellular:28155257;vacuole:15215502;vacuole:15539469
AT1G02500	S-adenosylmethionine synthetase 1;encodes a S-adenosylmethionine synthetase. SAM1 is regulated by protein S-nitrosylation. The covalent binding of nitric oxide (NO) to the Cys114 residue inhibits the enzyme activity.	cytosol		cytosol:21166475;extracellular:26572690;nucleus:14505352;plasma membrane:17317660;plasma membrane:19334764
AT1G02690	importin alpha isoform 6;Putative importin alpha isoform. When overexpressed can rescue the impa-4 decreased transformation susceptibility phenotype.	nucleus		golgi:25900983;golgi:25900983;golgi:25900983;golgi:25900983
AT1G02920	glutathione S-transferase 7;Encodes glutathione transferase belonging to the phi class of GSTs. Naming convention according to Wagner et al. (2002).	cytosol	cytosol:19329564;cytosol:19995732;unclear:15610358	extracellular:26572690;peroxisome:19329564;plasma membrane:25641898;vacuole:15539469
AT1G02930	glutathione S-transferase 6;Encodes glutathione transferase belonging to the phi class of GSTs. Naming convention according to Wagner et al. (2002).	cytosol	cytosol:19174456;unclear:18931141;unclear:19995732	cytosol:21166475;extracellular:26572690;mitochondrion:12492832;mitochondrion:14671022;mitochondrion:27122571;plasma membrane:25641898;plasma membrane:19334764;plasma membrane:26781341;plastid:24361574;vacuole:15539469
AT1G04080	Tetratricopeptide repeat (TPR)-like superfamily protein;	nucleus		cytosol:21166475
AT1G04170	eukaryotic translation initiation factor 2 gamma subunit;protein synthesis initiation factor eIF2 gamma	cytosol		cytoskeleton:24134884;cytosol:21166475;extracellular:26572690;golgi:25900983;golgi:25900983;golgi:25900983;nucleus:27177187;nucleus:23396599;plasma membrane:25641898;plasma membrane:19334764
AT1G04430	S-adenosyl-L-methionine-dependent methyltransferases superfamily protein;	golgi		golgi:16618929;golgi:22430844;golgi:22923678;golgi:25900983;golgi:25122472;golgi:25900983;golgi:25900983;golgi:25900983;golgi:25900983;mitochondrion:27122571;nucleus:23396599;plasma membrane:19334764;plasma membrane:21433285;vacuole:17151019
AT1G04810	26S proteasome regulatory complex, non-ATPase subcomplex, Rpn2/Psmd1 subunit;	cytosol,nucleus		cytosol:14623887;cytosol:21166475;golgi:25900983;golgi:25900983;golgi:25900983;plasma membrane:17317660;plasma membrane:19334764
AT1G04850	ubiquitin-associated (UBA)/TS-N domain-containing protein;	nucleus		cytosol:21166475
AT1G04870	protein arginine methyltransferase 10;Encodes a type I protein arginine methyltransferase based on the At1g04870.2 gene model. PRMT10 can catalyze the asymmetric dimethylation of arginine 3 on histone 4 and can also methylate myelin basic protein in vitro. Mutants lacking PRMT10 flower late due to defects in the autonomous pathway and they have elevated levels of FLC transcripts.	cytosol		cytosol:21166475;extracellular:26572690
AT1G05010	ethylene-forming enzyme;Encodes 1-aminocyclopropane-1-carboxylate oxidase	golgi		golgi:25900983;golgi:25900983;golgi:25900983;golgi:25900983;golgi:25900983;plasma membrane:26781341;vacuole:25900983
AT1G05520	Sec23/Sec24 protein transport family protein;	golgi,endoplasmic reticulum		cytosol:21166475;plasma membrane:19334764;plasma membrane:21433285
AT1G06210	ENTH/VHS/GAT family protein;	nucleus		cytosol:18433157;nucleus:18433157
AT1G06400	Ras-related small GTP-binding family protein;small GTP-binding protein (ara-2)	cytosol	cytosol:22974509	golgi:25900983;golgi:25900983;golgi:25900983;golgi:25900983;golgi:21826108;golgi:25900983;plasma membrane:25641898;plasma membrane:17317660;plasma membrane:19334764;plasma membrane:22215637;plasma membrane:26781341;plastid:24872594;vacuole:25900983
AT1G06900	Insulinase (Peptidase family M16) family protein;	cytosol		cytosol:21166475;plastid:24872594
AT1G07140	Pleckstrin homology (PH) domain superfamily protein;Encodes a putative Ran-binding protein (siRanBP).	cytosol		extracellular:26572690;plasma membrane:25641898;plastid:20061580
AT1G07670	endomembrane-type CA-ATPase 4;	endoplasmic reticulum		endoplasmic reticulum:16618929;endoplasmic reticulum:22923678;golgi:25900983;golgi:25900983;golgi:25900983;golgi:25900983;golgi:25900983;plasma membrane:17317660;plasma membrane:20843791;plasma membrane:21433285
AT1G07890	ascorbate peroxidase 1;Encodes a cytosolic ascorbate peroxidase APX1. Ascorbate peroxidases are enzymes that scavenge hydrogen peroxide in plant cells. Eight types of APX have been described for Arabidopsis: three cytosolic (APX1, APX2, APX6), two chloroplastic types (stromal sAPX, thylakoid tAPX), and three microsomal (APX3, APX4, APX5) isoforms. At least part of the induction of heat shock prot…	cytosol		cytosol:21166475;extracellular:26572690;golgi:22430844;golgi:25900983;golgi:25900983;golgi:25900983;golgi:25900983;golgi:25900983;plasma membrane:25641898;plasma membrane:17644812;plasma membrane:22215637;plasma membrane:26781341;plastid:16207701;plastid:24361574;vacuole:25900983
AT1G08370	decapping 1;Encodes DCP1 involved in mRNA decapping. DCP1 forms a mRNA decapping complex with DCP2 (At5g13570) and VCS (VARICOSE) (At3g13300). However, unlike DCP2, DCP1 itself does not have mRNA decapping activity in vitro. DCP1, DCP2 and VCS colocalize in cytoplasmic loci, which are putative Arabidopsis mRNA processing bodies. Null mutants of DCP1, DCP2, and VCS accumulate capped mRNAs with a r…	cytosol	cytosol:18643965	extracellular:26572690
AT1G08420	BRI1 suppressor 1 (BSU1)-like 2;	nucleus		plasma membrane:17317660;plasma membrane:17644812;plasma membrane:22215637;plasma membrane:26781341
AT1G08680	ARF GAP-like zinc finger-containing protein ZIGA4;A member of ARF GAP domain (AGD), A thaliana has 15 members, grouped into four classes. AGD14 belongs to the class 4, together with AGD15.	plasma membrane		plasma membrane:17317660;plasma membrane:26781341
AT1G08880	Histone superfamily protein;Encodes HTA5, a histone H2A protein. H2AX is a meiosis-specific isoform of histone H2A. Upon DSB formation, rapid accumulation of phosphorylated H2AX (&#947;-H2AX) occurs around the break site. _x0001_H2AX foci accumulate in early G2. Immunolocalization studies in spread preparations of wild-type meiocytes at G2/early leptotene revealed the accumulation of numerous rat…	nucleus		extracellular:26572690;plasma membrane:19334764;plastid:24872594
AT1G09150	pseudouridine synthase and archaeosine transglycosylase (PUA) domain-containing protein;	cytosol		cytosol:21166475
AT1G09270	importin alpha isoform 4;Protein interacts with Agrobacterium proteins VirD2 and VirE2.	nucleus		cytosol:21166475;golgi:25900983;golgi:25900983;golgi:25900983;golgi:25900983
AT1G09490	NAD(P)-binding Rossmann-fold superfamily protein;similar to Eucalyptus gunnii alcohol dehydrogenase of unknown physiological function (GI:1143445), Vigna unguiculata (gi:1854445), NOT a cinnamyl-alcohol dehydrogenase; Location of EST gb:H37170, gb:H77227 and gb:AA605565	endoplasmic reticulum
AT1G09620	ATP binding;leucine-tRNA ligases;aminoacyl-tRNA ligases;nucleotide binding;ATP binding;aminoacyl-tRNA ligases;	cytosol		cytosol:21166475;golgi:25900983;golgi:25900983;golgi:25900983;golgi:25900983;golgi:25900983;mitochondrion:27943495;plasma membrane:21433285;plasma membrane:22215637;plasma membrane:26781341
AT1G09640	Translation elongation factor EF1B, gamma chain;	cytosol		cytosol:21166475;cytosol:22522809;extracellular:26572690;golgi:25900983;golgi:25900983;golgi:25900983;golgi:25900983;golgi:25900983;mitochondrion:27122571;nucleus:24012629;plasma membrane:25641898;plasma membrane:17317660;plasma membrane:19334764;plasma membrane:22215637;plasma membrane:26781341;vacuole:22923678;vacuole:23903016;vacuole:25900983
AT1G09780	Phosphoglycerate mutase, 2,3-bisphosphoglycerate-independent;	cytosol		cytosol:21166475;cytosol:22522809;extracellular:26572690;plasma membrane:17317660;plasma membrane:17644812;plasma membrane:19334764;plasma membrane:21433285;plasma membrane:26781341;plastid:20061580;plastid:24361574
AT1G10200	GATA type zinc finger transcription factor family protein;	cytosol	cytoskeleton:20817848;cytoskeleton:24284066	golgi:25900983;golgi:25900983;golgi:25900983;golgi:25900983;golgi:25900983;plasma membrane:17317660;plastid:24872594
AT1G10290	dynamin-like protein 6;involved in trafficking from the trans-Golgi Network to the central vacuole.	golgi	cytosol:14750520;golgi:11449048;golgi:25462567;golgi:25462567;plasma membrane:25462567	cytoskeleton:24134884;golgi:25900983;golgi:25900983;golgi:25900983;golgi:25900983;golgi:25900983;nucleus:23396599;plasma membrane:25641898;plasma membrane:15308754;plasma membrane:17317660;plasma membrane:19334764;plasma membrane:20374526;plasma membrane:21433285;plasma membrane:22215637;plasma membrane:22923678;plasma membrane:26781341;plastid:24872594;vacuole:15215502;vacuole:17151019;vacuole:2…
AT1G10590	Nucleic acid-binding, OB-fold-like protein;	cytosol		cytoskeleton:24134884;extracellular:26572690;plasma membrane:15574830;plasma membrane:17317660;plasma membrane:17644812
AT1G10670	ATP-citrate lyase A-1;One of the three genes encoding subunit A of the trimeric protein ATP Citrate Lyase. Antisense ACLA-1 plants cause a reduction in cytosolic acetyl-CoA metabolism and have upregulation of stress-related genes and down-regulation of primary metabolism and growth genes, suggesting the mutation restricts normal growth and developmental processes and puts the plant into a state o…	cytosol		cytosol:21166475;golgi:25900983;golgi:25900983;golgi:25900983;golgi:25900983;vacuole:25900983
AT1G10840	translation initiation factor 3 subunit H1;Encodes eukaryotic initiation factor 3H1 subunit (TIF3H1).	cytosol		cytosol:21166475;golgi:25900983;golgi:25900983;golgi:25900983;nucleus:27177187;nucleus:23396599;vacuole:25900983
AT1G10940	Protein kinase superfamily protein;Encodes a plant protein kinase similar to the calcium/calmodulin-dependent protein kinase subfamily and the SNF1 kinase subfamily (SnRK2) whose activity is activated by ionic (salt) and non-ionic (mannitol) osmotic stress. Kinase activity of its homolog in tobacco is induced by hyperosmotic condition within 1 minute.	cytosol	cytosol:22738204;plasma membrane:22738204	cytosol:21166475;nucleus:18433157
AT1G11090	alpha/beta-Hydrolases superfamily protein;	cytosol		golgi:22430844
AT1G11650	RNA-binding (RRM/RBD/RNP motifs) family protein;	cytosol		vacuole:25900983
AT1G11660	heat shock protein 70 (Hsp 70) family protein;	cytosol		cytoskeleton:24134884;plasma membrane:19334764
AT1G11890	Synaptobrevin family protein;member of SEC22 Gene Family	endoplasmic reticulum	endoplasmic reticulum:15342965;endoplasmic reticulum:16223486;endoplasmic reticulum:16954136;endoplasmic reticulum:18088326	golgi:25900983;golgi:25900983;golgi:25900983;golgi:25900983;plasma membrane:17644812;plasma membrane:22215637;vacuole:25900983
AT1G12270	stress-inducible protein, putative;	nucleus		cytosol:21166475;extracellular:26572690
AT1G12920	eukaryotic release factor 1-2;Encodes a eukaryotic release factor one homolog.	cytosol		cytosol:21166475;golgi:25900983;golgi:25900983;golgi:25900983;plasma membrane:17317660;plasma membrane:26781341;vacuole:25900983
AT1G13320	protein phosphatase 2A subunit A3;one of three genes encoding the 65 kDa regulatory subunit of protein phosphatase 2A (PP2A)	cytosol		golgi:25900983;golgi:25900983;golgi:25900983;golgi:25900983;plasma membrane:25641898;plasma membrane:17317660;plasma membrane:17644812;plasma membrane:22215637;plasma membrane:26781341
AT1G13950	eukaryotic elongation factor 5A-1;Encodes eukaryotic translation initiation factor 5A (EIF-5A).In mammalian cells it functions as a shuttle protein that translocates mRNA from the nucleus to cytoplasmic ribosomes. Overexpression results in an increase in both primary and secondary xylem formation. In RNAi suppressed lines, xylem formation is reduced.	cytosol
AT1G14710	hydroxyproline-rich glycoprotein family protein;	nucleus		cytosol:21166475;plasma membrane:21433285
AT1G14810	semialdehyde dehydrogenase family protein;encodes an aspartate semialdehyde dehydrogenase, which produces the branch point intermediate for lysine and threonine/methionine biosynthesis	plastid	cytosol:24130194	extracellular:26572690;golgi:25900983;golgi:25900983;golgi:25900983;golgi:25900983;golgi:25900983;mitochondrion:14671022;mitochondrion:27943495;plastid:20423899;plastid:21531424;plastid:22923678;plastid:18431481;plastid:18633119;plastid:20061580;plastid:23549413;plastid:24361574;plastid:24872594
AT1G14830	DYNAMIN-like 1C;Encodes a dynamin-like protein that is involved in mitochondrial morphogenesis and pollen development. Protein is localized as speckles in the cytoplasm, partially co-localizes with mitochondrial markers, cell plate of dividing cells, and the tip of root hairs, root cap cells, and expanding part of trichoblasts.	cytosol	cytoskeleton:14750520;cytosol:18502847;cytosol:14750520;mitochondrion:14523248;plasma membrane:18502847	cytoskeleton:24134884;golgi:25900983;golgi:25900983;golgi:25900983;golgi:25900983;golgi:25900983;nucleus:23396599;plasma membrane:25641898;plasma membrane:16618929;plasma membrane:17317660;plasma membrane:19334764;plasma membrane:20843791;plasma membrane:21433285;plasma membrane:22215637;plasma membrane:22923678;plasma membrane:26781341;vacuole:15215502;vacuole:23903016;vacuole:25900983
AT1G15130	Endosomal targeting BRO1-like domain-containing protein;	nucleus		cytosol:21166475;golgi:25900983;golgi:25900983;golgi:25900983;plasma membrane:19334764;plasma membrane:21433285
AT1G15140	FAD/NAD(P)-binding oxidoreductase;	plastid		plastid:12938931;plastid:16207701;plastid:16648217;plastid:20423899;plastid:21531424;plastid:18431481;plastid:18633119;plastid:20061580;plastid:24361574;plastid:24872594
AT1G15750	Transducin family protein / WD-40 repeat family protein;Encodes a protein with several WD40 repeats at the C-terminus and predicted protein-protein interaction domains at the N-terminus. Together with the TOPLESS-RELATED PROTEINS (TPRs), it is thought to be involved in transcriptional repression of root-promoting genes in the top half of the embryo during the transition stage of embryogenesis. It…	cytosol		cytosol:18433157;cytosol:21166475
AT1G15790	;	cytosol		cytosol:21166475
AT1G16350	Aldolase-type TIM barrel family protein;	peroxisome		cytosol:21166475;mitochondrion:27122571;plastid:23851315
AT1G16520	;	nucleus		plasma membrane:17317660
AT1G16890	ubiquitin-conjugating enzyme 36;UBC36/UBC13B encodes a protein that may play a role in DNA damage responses and error-free post-replicative DNA repair. It can bind to the MMZ/UEV1 proteins in vitro.	golgi		golgi:25900983;golgi:25900983;golgi:25900983;golgi:25900983;golgi:25900983;plasma membrane:17644812;vacuole:25900983
AT1G17710	Pyridoxal phosphate phosphatase-related protein;	cytosol
AT1G18070	Translation elongation factor EF1A/initiation factor IF2gamma family protein;	cytosol		cytosol:21166475;extracellular:26572690;plasma membrane:25641898;vacuole:15539469
AT1G18450	actin-related protein 4;Encodes a gene similar to actin-related proteins in other organisms. Member of nuclear ARP family of genes. Component of chromatin remodeling complexes, involved in chromatin-mediated gene regulation. Phenotype of the arp4-1 mutant allele revealed partial sterility due to defects in anther development. Targeting the distinct, 3' UTR of AtARP4 transcripts with RNA interfere…	nucleus		cytoskeleton:24134884;golgi:25900983;golgi:25900983;golgi:25900983;golgi:25900983;golgi:25900983;nucleus:15496452;nucleus:23396599;plasma membrane:21433285;vacuole:25900983
AT1G18500	methylthioalkylmalate synthase-like 4;Encodes an active Arabidopsis isopropylmalate synthase IPMS1. Involved in leucine biosynthesis. Do not participate in the chain elongation of glucosinolates. Expressed constitutively throughout the plant. Loss of IPMS1 can be compensated by a second isopropylmalate synthase gene IPMS2 (At1g74040).	plastid		extracellular:26572690;golgi:25900983;golgi:25900983;golgi:25900983;golgi:25900983;plastid:20423899;plastid:21531424;plastid:18431481;plastid:20061580;plastid:24361574;plastid:24872594
AT1G20110	RING/FYVE/PHD zinc finger superfamily protein;	nucleus		golgi:25900983;golgi:25900983;golgi:25900983;golgi:25900983;peroxisome:14581625
AT1G20200	PAM domain (PCI/PINT associated module) protein;	cytosol,nucleus		cytosol:14623888;cytosol:21166475;extracellular:26572690;golgi:25900983;golgi:25900983;golgi:25900983;golgi:25900983;golgi:25900983;plasma membrane:17317660;plasma membrane:19334764;vacuole:25900983
AT1G20330	sterol methyltransferase 2;Encodes a sterol-C24-methyltransferases involved in sterol biosynthesis. Mutants display altered sterol composition, serrated petals and sepals and altered cotyledon vascular patterning as well as ectopic endoreduplication. This suggests that suppression of endoreduplication is important for petal morphogenesis and that normal sterol composition is required for this sup…	endoplasmic reticulum		endoplasmic reticulum:16618929;endoplasmic reticulum:22923678;golgi:22430844;golgi:25900983;golgi:25900983;golgi:25900983;golgi:25900983;golgi:25900983;plasma membrane:25641898;plasma membrane:19334764;plasma membrane:22215637;plasma membrane:26781341;vacuole:25900983
AT1G20370	Pseudouridine synthase family protein;	cytosol		cytosol:21166475
AT1G20760	Calcium-binding EF hand family protein;	plasma membrane		golgi:25900983;golgi:25900983;plasma membrane:17317660;plasma membrane:20374526;plasma membrane:21433285;plasma membrane:26781341
AT1G21080	DNAJ heat shock N-terminal domain-containing protein;	golgi		golgi:22430844;golgi:25900983;golgi:25900983;golgi:25900983;plasma membrane:19334764;plasma membrane:22215637;plasma membrane:26781341;vacuole:25900983
AT1G21380	Target of Myb protein 1;	nucleus		extracellular:26572690;plasma membrane:22318864;plasma membrane:26781341
AT1G21630	Calcium-binding EF hand family protein;	plasma membrane		cytosol:18433157;extracellular:26572690;golgi:25900983;golgi:25900983;golgi:25900983;golgi:25900983;plasma membrane:17317660;plasma membrane:21433285;plasma membrane:22215637;plasma membrane:26781341
AT1G21690	ATPase family associated with various cellular activities (AAA) ;	nucleus		cytoskeleton:24134884;golgi:25900983;golgi:25900983;nucleus:15496452
AT1G21750	PDI-like 1-1;Encodes a protein disulfide isomerase-like (PDIL) protein, a member of a multigene family within the thioredoxin (TRX) superfamily; isoform contains non-consensus GA donor splice site at intron 9. Transcript levels for this gene are up-regulated in response to three different chemical inducers of ER stress (dithiothreitol, beta-mercaptoethanol, and tunicamycin). Neither AtIRE1-2 nor …	endoplasmic reticulum	endoplasmic reticulum:18931141	endoplasmic reticulum:16618929;endoplasmic reticulum:22923678;endoplasmic reticulum:24393051;extracellular:26572690;golgi:25900983;golgi:25900983;golgi:25900983;golgi:25900983;mitochondrion:27122571;mitochondrion:27943495;plasma membrane:25641898;plasma membrane:19334764;plasma membrane:21433285;plasma membrane:22215637;plasma membrane:26781341;plastid:14729914;plastid:15028209;plastid:24361574;v…
AT1G22410	Class-II DAHP synthetase family protein;	plastid		cytosol:28611809;extracellular:26572690;golgi:25900983;golgi:25900983;golgi:25900983;golgi:25900983;golgi:25900983;mitochondrion:27943495;plasma membrane:19334764;plastid:21531424;plastid:22923678;plastid:24872594;vacuole:25900983
AT1G22530	PATELLIN 2;	cytosol,plasma membrane	cytosol:27335345;plasma membrane:27335345	extracellular:26572690;golgi:22430844;golgi:25900983;golgi:25900983;golgi:25900983;golgi:25900983;golgi:25900983;mitochondrion:27122571;nucleus:23396599;plasma membrane:25641898;plasma membrane:15574830;plasma membrane:16635983;plasma membrane:17317660;plasma membrane:17644812;plasma membrane:19334764;plasma membrane:20843791;plasma membrane:21433285;plasma membrane:22215637;plasma membrane:22318…
AT1G22920	COP9 signalosome 5A;AJH1 encodes a protein similar to JAB1, a specific mammalian coactivator of AP-1 transcription. Encodes a subunit of the COP9 complex that is involved in protein deneddylation. Plants with mutations in CSN5A and CSN5B have a de-etiolated phenotype.	cytosol		extracellular:26572690
AT1G24050	RNA-processing, Lsm domain;	cytosol
AT1G24510	TCP-1/cpn60 chaperonin family protein;	cytosol		cytosol:21166475;extracellular:26572690;golgi:25900983;golgi:25900983;golgi:25900983;golgi:25900983;plasma membrane:25641898;plasma membrane:17317660;plasma membrane:19334764;plasma membrane:26781341;vacuole:23903016;vacuole:25900983
AT1G25490	ARM repeat superfamily protein;One of three genes encoding phosphoprotein phosphatase 2A regulatory subunit A; Recessive ethylene-response mutant EER1 displays increased ethylene sensitivity in the hypocotyl and stem	plasma membrane		golgi:25900983;golgi:25900983;golgi:25900983;golgi:25900983;golgi:25900983;plasma membrane:17644812;plasma membrane:19334764;plasma membrane:22215637;plasma membrane:26781341;vacuole:25900983
AT1G26110	decapping 5;Encodes Decapping 5, required for mRNA decapping, P-body formation and translational repression during postembryonic development.	nucleus		cytoskeleton:24134884;cytosol:21166475;plasma membrane:21433285
AT1G26630	Eukaryotic translation initiation factor 5A-1 (eIF-5A 1) protein;Eukaryotic translation initiation factor 5A-2. Involved in programmed cell death triggered as a response to pseudomonas syringae infection. Loss of function mutants are more resistant to infection.	cytosol		extracellular:26572690;plasma membrane:25641898;plasma membrane:19334764;plasma membrane:22215637;plasma membrane:26781341;plastid:20061580;plastid:24361574
AT1G27090	glycine-rich protein;	nucleus	cytosol:15141064;unclear:15141064	cytoskeleton:24134884;cytosol:21166475;golgi:25900983;golgi:25900983;golgi:25900983;golgi:25900983;golgi:25900983;nucleus:27177187;plasma membrane:22318864;vacuole:25900983
AT1G27450	adenine phosphoribosyl transferase 1;Adenosine phosphoribosyl transferase(E.C:2.4.2.7), involved in the one-step salvage of adenine to AMP.	cytosol		cytosol:21166475;extracellular:16287169;extracellular:26572690;golgi:22430844;golgi:25900983;golgi:25900983;golgi:25900983;golgi:25900983;plasma membrane:25641898;plasma membrane:17644812;plasma membrane:26781341;plastid:21531424;plastid:20061580;plastid:24361574;plastid:24872594;vacuole:25900983
AT1G28120	;	nucleus
AT1G28200	FH interacting protein 1;VirF-interacting protein FIP1	golgi		extracellular:26572690;golgi:25900983;golgi:25900983;golgi:25900983;vacuole:25900983
AT1G29150	non-ATPase subunit 9;specifically interacts with FUS6/COP11 via the C-terminal domain of FUS6/COP11 and associates with an ATPase subunit of the 19S proteasome regulatory complex, AtS6A.	cytosol,nucleus		cytosol:14623892;cytosol:21166475;extracellular:26572690;golgi:25900983;golgi:25900983;golgi:25900983;mitochondrion:27122571;vacuole:25900983
AT1G29850	double-stranded DNA-binding family protein;	nucleus	cytosol:26884483;nucleus:26884483	cytosol:21166475
AT1G30070	SGS domain-containing protein;	cytosol		plasma membrane:17644812
AT1G30230	Glutathione S-transferase, C-terminal-like;Translation elongation factor EF1B/ribosomal protein S6;	cytosol		cytosol:21166475;cytosol:22522809;extracellular:26572690;golgi:25900983;golgi:25900983;nucleus:24012629;plasma membrane:25641898;plasma membrane:17317660;plasma membrane:19334764;plasma membrane:22215637;plasma membrane:26781341;vacuole:23903016
AT1G30470	SIT4 phosphatase-associated family protein;	golgi		golgi:25900983;golgi:25900983;vacuole:17151019
AT1G30580	GTP binding;	cytosol		cytosol:21166475;extracellular:26572690;golgi:25900983;golgi:25900983;golgi:25900983;golgi:25900983;golgi:25900983;plasma membrane:25641898;plasma membrane:22215637;plasma membrane:26781341;vacuole:25900983
AT1G30630	Coatomer epsilon subunit;	golgi	cytosol:17307898;golgi:16553898;golgi:17307898	golgi:25900983;golgi:25900983;golgi:25900983;golgi:25900983;golgi:25900983;nucleus:14505352;nucleus:24012629;vacuole:17151019;vacuole:25900983
AT1G30690	Sec14p-like phosphatidylinositol transfer family protein;	cytosol		cytosol:18433157;cytosol:21166475;mitochondrion:27122571;nucleus:18433157;plasma membrane:25641898;plasma membrane:17317660;plasma membrane:17644812;plasma membrane:19334764;plasma membrane:21433285;plasma membrane:22215637;plasma membrane:22318864;plasma membrane:26781341
AT1G31070	N-acetylglucosamine-1-phosphate uridylyltransferase 1;Encodes a protein that functions as an N-acetylglucosamine-1-phosphate uridylyltransferase that catalyzes the formation of UDP-N-acetylglucosamine (UDP-GlcNAc). This is an essential precursor for glycolipid and glycoprotein synthesis and is also used for regulatory protein modification in signaling pathways. The enzyme can also catalyze the re…	cytosol		cytosol:21166475;plasma membrane:17644812
AT1G31730	Adaptin family protein;	nucleus		cytoskeleton:24134884;cytosol:21166475;golgi:25900983;golgi:25900983;golgi:25900983;golgi:25900983;plasma membrane:19334764;vacuole:25900983
AT1G31860	histidine biosynthesis bifunctional protein (HISIE);encodes a bifunctional protein that has phosphoribosyl-ATP pyrophosphohydrolase (PRA-PH) and phosphoribosyl-AMP cyclohydrolase (PRA-CH) activities.	plastid		extracellular:26572690;golgi:25900983;plastid:18431481;plastid:20423899;plastid:20061580;plastid:24361574
AT1G32050	SCAMP family protein;	plasma membrane		golgi:22430844;golgi:25900983;golgi:25900983;golgi:21826108;golgi:25900983;mitochondrion:14671022;plasma membrane:25641898;plasma membrane:15060130;plasma membrane:17317660;plasma membrane:20843791;plasma membrane:22215637;plasma membrane:22318864;plasma membrane:22923678;plasma membrane:26781341
AT1G32200	phospholipid/glycerol acyltransferase family protein;Encodes a chloroplast glycerol-3-phosphate acyltransferase.Involved in the biosynthesis of chloroplast phosphatidylglycerol.	plastid		plastid:20423899;plastid:21531424;plastid:23851315;plastid:18431481;plastid:18633119;plastid:20061580;plastid:24361574
AT1G32440	plastidial pyruvate kinase 3;encodes a chloroplast pyruvate kinase beta subunit. The enzyme is less active than the other chloroplast pyruvate kinase beta subunit encoded by AT5G52920. Involved in seed oil biosynthesis. Can partially complement the AT5G52920 mutant.	plastid		plastid:18431481;plastid:21531424;plastid:24361574
AT1G35140	Phosphate-responsive 1 family protein;At1g35140 (At1g35140/T32G9_32) mRNA, complete cds	extracellular		cytoskeleton:24134884;extracellular:16287169;extracellular:16356755;golgi:22430844;vacuole:23903016
AT1G35620	PDI-like 5-2;Encodes a protein disulfide isomerase-like (PDIL) protein, a member of a multigene family within the thioredoxin (TRX) superfamily. Unlike several other PDI family members, transcript levels for this gene are not up-regulated in response to three different chemical inducers of ER stress (dithiothreitol, beta-mercaptoethanol, and tunicamycin). However, the level of transcripts for thi…	endoplasmic reticulum		endoplasmic reticulum:16618929;endoplasmic reticulum:22923678;extracellular:16287169;plasma membrane:25641898;plasma membrane:19334764;plasma membrane:21433285;plasma membrane:22215637;plasma membrane:26781341;vacuole:17151019
AT1G35670	calcium-dependent protein kinase 2;Encodes a Ca(2+)-dependent, calmodulin-independent protein kinase that is rapidly induced by drought and high-salt stress but not by low-temperature stress or heat stress. Positive regulator of ABA signaling. Phosphorylates ABA responsive transcription factors ABF1 and ABF4.	cytosol	cytosol:16438971;nucleus:16438971	cytosol:21166475;plasma membrane:17317660
AT1G36730	Translation initiation factor IF2/IF5;	cytosol		cytosol:21166475;extracellular:26572690
AT1G37130	nitrate reductase 2;Identified as a mutant resistant to chlorate. Encodes nitrate reductase structural gene. Involved in nitrate assimilation. Has nitrate reductase activity. Up-regulated by the fungus P. indica. Binds transcription factor At2g35940.	cytosol		cytosol:21166475;mitochondrion:27122571;plasma membrane:25641898;plasma membrane:17317660;plasma membrane:21433285;plasma membrane:26781341;vacuole:18686298
AT1G43190	polypyrimidine tract-binding protein 3;	nucleus		golgi:25900983;plasma membrane:19334764
AT1G43690	ubiquitin interaction motif-containing protein;	cytosol		cytosol:21166475;mitochondrion:27122571
AT1G43700	VIRE2-interacting protein 1;Encodes a VirE2-interacting protein. VIP1 mediates nuclear translocation of VirE2 via its amino half, and interacts with histone H2A via it carboxyl half.	nucleus	cytosol:22452852;cytosol:27208231;nucleus:15141064;nucleus:16581911;nucleus:22452852;nucleus:27208231	plastid:24872594
AT1G43710	Pyridoxal phosphate (PLP)-dependent transferases superfamily protein;	cytosol		golgi:25900983;golgi:25900983;plasma membrane:22318864;vacuole:25900983
AT1G44790	ChaC-like family protein;	peroxisome		cytosol:21166475;peroxisome:12154131
AT1G44820	Peptidase M20/M25/M40 family protein;	endoplasmic reticulum	unclear:18931141	endoplasmic reticulum:22923678;plasma membrane:19334764
AT1G44835	YbaK/aminoacyl-tRNA synthetase-associated domain;	cytosol		cytosol:21166475;golgi:25900983;vacuole:25900983
AT1G45000	AAA-type ATPase family protein;	cytosol,nucleus	nucleus:15496452	extracellular:26572690;nucleus:15496452;plasma membrane:17317660;plasma membrane:19334764;plasma membrane:22215637;plasma membrane:22318864
AT1G47550	exocyst complex component sec3A;Encodes a member of the exocyst complex gene family. The exocyst is a protein complex involved in tethering vesicles to the plasma membrane during regulated or polarized secretion.	plasma membrane	cytosol:24307681;cytosol:23495664;plasma membrane:23495664;plasma membrane:24307681;plasma membrane:28074928	golgi:25900983;golgi:25900983;golgi:25900983;golgi:25900983;golgi:25900983;plasma membrane:17317660;plasma membrane:17644812;plasma membrane:19334764;plasma membrane:21433285;plasma membrane:22215637;plasma membrane:26781341;vacuole:25900983
AT1G48160	signal recognition particle 19 kDa protein, putative / SRP19, putative;	cytosol		nucleus:27177187
AT1G48860	RNA 3'-terminal phosphate cyclase/enolpyruvate transferase, alpha/beta;	plastid		plastid:18431481;plastid:20423899;plastid:21531424;plastid:23851315;plastid:24361574
AT1G48900	Signal recognition particle, SRP54 subunit protein;	cytosol		cytosol:21166475;golgi:25900983;golgi:25900983;golgi:25900983;golgi:25900983;golgi:25900983;plastid:21531424;vacuole:25900983
AT1G48920	nucleolin like 1;Encodes ATNUC-L1 (NUCLEOLIN LIKE 1), the predominant form of the two nucleolin proteins found in Arabidopsis. This protein is involved in rRNA processing, ribosome biosynthesis, and vascular pattern formation. PARL1 localizes to the nucleolus and parl1 mutants accumulate elevated levels of the unspliced 35S pre-rRNA. parl1 mutants also have defects in cotyledon, leaf, sepal, and …	nucleus	nucleus:17286797	extracellular:26572690;golgi:25900983;mitochondrion:22923678;mitochondrion:27122571;nucleus:14505352;nucleus:15496452;plasma membrane:19334764;plasma membrane:21433285
AT1G49340	Phosphatidylinositol 3- and 4-kinase family protein;Encodes a phosphatidylinositol 4-kinase that is expressed in inflorescences and shoots.	plasma membrane	cytosol:25736058;nucleus:12805633;plasma membrane:25736058	golgi:25900983;golgi:25900983;golgi:25900983;golgi:25900983;plasma membrane:17317660;plasma membrane:20374526;plasma membrane:21433285;plasma membrane:22215637;plasma membrane:26781341
AT1G49600	RNA-binding protein 47A;	nucleus		cytosol:21166475
AT1G49660	carboxyesterase 5;Encodes a protein with carboxylesterase whose activity was tested using pNA.	cytosol
AT1G49760	poly(A) binding protein 8;polyadenylate-binding protein, putative / PABP, putative, similar to poly(A)-binding protein GB:AAF66825 GI:7673359 from (Nicotiana tabacum). Highly and ubiquitously expressed. Member of the class II PABP family.	cytosol		cytosol:21166475;extracellular:26572690;golgi:25900983;golgi:25900983;golgi:25900983;mitochondrion:27943495;plasma membrane:21433285;plasma membrane:22215637
AT1G49820	S-methyl-5-thioribose kinase;encodes 5-methylthioribose kinase, involved in methionine cycle	cytosol		cytosol:21166475
AT1G50200	Alanyl-tRNA synthetase;	mitochondrion	mitochondrion:16251277;plastid:16251277	cytosol:21166475;extracellular:26572690;mitochondrion:27122571;mitochondrion:27943495;plasma membrane:26781341;vacuole:23903016
AT1G50370	Calcineurin-like metallo-phosphoesterase superfamily protein;	cytosol	cytosol:23404889;nucleus:23404889;plasma membrane:23404889
AT1G50380	Prolyl oligopeptidase family protein;	cytosol		cytosol:21166475;mitochondrion:27943495
AT1G50500	Membrane trafficking VPS53 family protein;encodes a member of VPS53 family protein involved in the retrograde trafficking of vesicles to the late Golgi. Mutants in this gene are more sensitive to heat and osmotic stress.	golgi		golgi:25900983;golgi:25900983;golgi:25900983;golgi:25900983;golgi:25900983;mitochondrion:14671022;vacuole:25900983
AT1G50570	Calcium-dependent lipid-binding (CaLB domain) family protein;	cytosol		extracellular:26572690
AT1G50600	scarecrow-like 5;Encodes a scarecrow-like protein (SCL5). Member of GRAS gene family.	nucleus		cytosol:21166475;golgi:25900983;golgi:25900983;golgi:25900983
AT1G50670	OTU-like cysteine protease family protein;	cytosol		cytosol:21166475;golgi:25900983;plastid:24361574
AT1G51510	RNA-binding (RRM/RBD/RNP motifs) family protein;This gene is predicted to encode a protein involved in the exon junction complex. Though there is a predicted RNA binding motif, in the Drosophila ortholog (33% identity), this motif mediates interactions with Mago and is not available for RNA binding. The Arabidopsis Y14 protein appears to be predominantly nucleolar, but there is also some evidence…	cytosol,nucleus	nucleus:15496452;nucleus:16953428	nucleus:15496452
AT1G51590	alpha-mannosidase 1;Encodes an alpha-mannosidase I enzyme responsible for N-glycan maturation.	golgi		golgi:16618929;golgi:22430844;golgi:22923678;plasma membrane:19334764;plasma membrane:21433285
AT1G51630	O-fucosyltransferase family protein;	golgi		extracellular:16287169;extracellular:16356755;golgi:16618929;golgi:22430844;golgi:22923678;golgi:25900983;golgi:25122472;golgi:25900983;golgi:25900983;golgi:25900983
AT1G51660	mitogen-activated protein kinase kinase 4;Encodes a mitogen-activated map kinase kinase (there are nine in Arabidopsis) involved in innate immunity. This protein activates MPK3/MPK6 and early-defense genes redundantly with MKK5. In plants with both MKK5 and MKK6 levels reduced by RNAi plants, floral organs do not abscise suggestion a role for both proteins in mediating floral organ abscission.	nucleus	cytosol:15610358;nucleus:15610358;unclear:15610358
AT1G51680	4-coumarate:CoA ligase 1;encodes an isoform of 4-coumarate:CoA ligase (4CL), which is involved in the last step of the general phenylpropanoid pathway. In addition to 4-coumarate, it also converts ferulate. The catalytic efficiency was in the following (descending) order: p-coumaric acid, ferulic acid, caffeic acid and 5-OH-ferulic acid. At4CL1 was unable to use sinapic acid as substrate.	peroxisome		mitochondrion:27943495
AT1G51690	protein phosphatase 2A 55 kDa regulatory subunit B alpha isoform;55 kDa B regulatory subunit of phosphatase 2A mRNA,	nucleus
AT1G51710	ubiquitin-specific protease 6;Ubiquitin-specific protease 6 (UBP6). Deubiquinating enzyme. Interacts with calmodulin.	cytosol		golgi:25900983;plasma membrane:21433285
AT1G51760	peptidase M20/M25/M40 family protein;encodes a member of the six Arabidopsis IAA-amino acid conjugate hydrolase subfamily and conjugates and conjugates IAA-Ala in vitro. Gene is expressed most strongly in roots, stems, and flowers.	endoplasmic reticulum		endoplasmic reticulum:16618929;endoplasmic reticulum:22923678;plasma membrane:17317660;plasma membrane:19334764;plasma membrane:26781341;vacuole:23903016
AT1G52260	PDI-like 1-5;Encodes a protein disulfide isomerase-like (PDIL) protein, a member of a multigene family within the thioredoxin (TRX) superfamily. Unlike several other PDI family members, transcript levels for this gene are not up-regulated in response to three different chemical inducers of ER stress (dithiothreitol, beta-mercaptoethanol, and tunicamycin).	endoplasmic reticulum		endoplasmic reticulum:16618929;endoplasmic reticulum:22923678
AT1G52340	NAD(P)-binding Rossmann-fold superfamily protein;Encodes a cytosolic short-chain dehydrogenase/reductase involved in the conversion of xanthoxin to ABA-aldehyde during ABA biosynthesis. Mutants are insensitive to sucrose and glucose.	cytosol	cytosol:12417697
AT1G52360	Coatomer, beta' subunit;	cytosol		cytosol:21166475;golgi:25900983;golgi:25900983;golgi:25900983;golgi:25900983;golgi:25900983;nucleus:23396599;plasma membrane:19334764;vacuole:23903016;vacuole:25900983
AT1G52730	Transducin/WD40 repeat-like superfamily protein;	cytosol		cytosol:21166475
AT1G53500	NAD-dependent epimerase/dehydratase family protein;encodes a putative NDP-L-rhamnose synthase, an enzyme required for the synthesis of the pectin rhamnogalacturonan I, the major component of Arabidopsis mucilage. Gene is involved in seed coat mucilage cell development. Mutant analyses suggest that MUM4 is required for complete mucilage synthesis, cytoplasmic rearrangement and seed coat developmen…	cytosol		cytosol:21166475;plasma membrane:19334764
AT1G53750	regulatory particle triple-A 1A;26S proteasome AAA-ATPase subunit RPT1a (RPT1a) mRNA,	cytosol,nucleus		cytosol:21166475;golgi:25900983;golgi:25900983;golgi:25900983;golgi:25900983;golgi:25900983;nucleus:27177187;plasma membrane:17317660;plasma membrane:19334764;plasma membrane:26781341;vacuole:25900983
AT1G54270	eif4a-2;member of eIF4A - eukaryotic initiation factor 4A	cytosol		cytosol:18433157;extracellular:26572690;golgi:25900983;golgi:25900983;golgi:25900983;golgi:25900983;golgi:21826108;golgi:25900983;nucleus:23396599;plasma membrane:17317660;plasma membrane:17644812;plasma membrane:19334764;plasma membrane:20843791;plasma membrane:21433285;plasma membrane:22215637;plastid:20061580;vacuole:17151019;vacuole:25900983
AT1G54990	alpha/beta-Hydrolases superfamily protein;auxin response mutant (AXR4)	endoplasmic reticulum		endoplasmic reticulum:16618929;endoplasmic reticulum:22923678;mitochondrion:15276431;plasma membrane:19334764;vacuole:17151019
AT1G55150	DEA(D/H)-box RNA helicase family protein;	cytosol		cytoskeleton:24134884;cytosol:21166475
AT1G55210	Disease resistance-responsive (dirigent-like protein) family protein;	extracellular		extracellular:26572690;extracellular:28155257
AT1G55500	evolutionarily conserved C-terminal region 4;	nucleus		cytosol:21166475;plasma membrane:21433285
AT1G56340	calreticulin 1a;Encodes one of three Arabidopsis calreticulins. In CRT-deficient mouse fibroblasts, this protein restores ER Ca2+ levels.	endoplasmic reticulum	endoplasmic reticulum:18931141	endoplasmic reticulum:16618929;endoplasmic reticulum:22923678;endoplasmic reticulum:24393051;extracellular:26572690;mitochondrion:12492832;mitochondrion:14671022;mitochondrion:21841088;mitochondrion:27943495;plasma membrane:25641898;plasma membrane:21433285;plasma membrane:22215637;plasma membrane:26781341;plastid:15028209;plastid:24361574;vacuole:17151019;vacuole:23903016
AT1G57720	Translation elongation factor EF1B, gamma chain;	cytosol		cytosol:21166475;cytosol:25587034;cytosol:22522809;extracellular:26572690;golgi:25900983;golgi:25900983;golgi:25900983;golgi:25900983;golgi:25900983;nucleus:24012629;plasma membrane:25641898;plasma membrane:17317660;plasma membrane:19334764;plasma membrane:20843791;plasma membrane:21433285;plasma membrane:22215637;plasma membrane:26781341;vacuole:23903016;vacuole:25900983
AT1G58280	Phosphoglycerate mutase family protein;	plastid		plastid:18431481;plastid:21531424;plastid:23667806
AT1G59610	dynamin-like 3;A high molecular weight GTPase whose GTP-binding domain shows a low homology to those of other plant dynamin-like proteins.Contains a pleckstrin homologous domain. DRP2B and DRP1A participate together in clathrin-coated vesicle formation during endocytosis.	plasma membrane	cytosol:18612642;golgi:25462567;golgi:25462567;plasma membrane:20231465;plasma membrane:25462567	cytoskeleton:24134884;golgi:25900983;golgi:25900983;golgi:25900983;golgi:25900983;golgi:25900983;nucleus:23396599;plasma membrane:25641898;plasma membrane:15308754;plasma membrane:15574830;plasma membrane:17317660;plasma membrane:17644812;plasma membrane:19334764;plasma membrane:20374526;plasma membrane:21433285;plasma membrane:22215637;plasma membrane:22923678;plasma membrane:26781341;vacuole:15…
AT1G59710	Protein of unknown function (DUF569);	cytosol
AT1G59760	RNA helicase, ATP-dependent, SK12/DOB1 protein;	nucleus		nucleus:23396599
AT1G59830	protein phosphatase 2A-2;Encodes one of the isoforms of the catalytic subunit of protein phosphatase 2A: AT1G59830/PP2A-1, AT1G10430/PP2A-2, At2g42500/PP2A-3, At3g58500/PP2A-4 [Plant Molecular Biology (1993) 21:475-485 and (1994) 26:523-528; Note that in more recent publications, there is mixed use of gene names for PP2A-3 and PP2A-4 - some refer to At2g42500 as PP2A-3 and some as PP2A-4].	plasma membrane		plasma membrane:17317660;plasma membrane:22215637;plasma membrane:26781341
AT1G59960	NAD(P)-linked oxidoreductase superfamily protein;	cytosol		cytosol:21166475
AT1G60070	Adaptor protein complex AP-1, gamma subunit;	golgi		cytosol:21166475;extracellular:26572690;golgi:25900983;golgi:25900983;golgi:25900983;golgi:25900983;vacuole:25900983
AT1G60420	DC1 domain-containing protein;Reduce transmission through pollen.	cytosol		cytosol:21166475
AT1G60780	Clathrin adaptor complexes medium subunit family protein;	golgi	golgi:23543752;golgi:23766365	cytosol:21166475;golgi:25900983;golgi:25900983;golgi:25900983;golgi:25900983;plasma membrane:19334764;vacuole:25900983
AT1G60810	ATP-citrate lyase A-2;One of the three genes encoding subunit A of the trimeric enzyme ATP Citrate lyase	cytosol
AT1G61150	LisH and RanBPM domains containing protein;	nucleus
AT1G61250	secretory carrier 3;Encodes a putative secretory carrier membrane protein (SC3).	plasma membrane		golgi:22923678;golgi:25900983;golgi:25900983;golgi:25900983;golgi:21826108;golgi:25900983;plasma membrane:25641898;plasma membrane:14506206;plasma membrane:15060130;plasma membrane:15308754;plasma membrane:15574830;plasma membrane:17317660;plasma membrane:20843791;plasma membrane:22215637;plasma membrane:23990937;plasma membrane:26781341;vacuole:25900983
AT1G62020	Coatomer, alpha subunit;	cytosol		cytosol:21166475;golgi:25900983;golgi:25900983;golgi:25900983;golgi:25900983;golgi:25900983;nucleus:23396599;plasma membrane:14506206;plasma membrane:17317660;plasma membrane:19334764;plasma membrane:21433285;vacuole:25900983
AT1G62380	ACC oxidase 2;Encodes a protein similar to 1-aminocyclopropane-1-carboxylic oxidase (ACC oxidase). Expression of the AtACO2 transcripts is affected by ethylene.	golgi	endoplasmic reticulum:22430844;golgi:22430844	cytosol:21166475;cytosol:25587034;golgi:22430844;golgi:25900983;golgi:25900983;golgi:25900983;golgi:25900983;golgi:25900983;plasma membrane:17317660;plasma membrane:17644812;plasma membrane:19334764;plasma membrane:26781341;vacuole:25900983
AT1G62390	Octicosapeptide/Phox/Bem1p (PB1) domain-containing protein / tetratricopeptide repeat (TPR)-containing protein;	nucleus		cytosol:21166475;nucleus:27177187
AT1G62740	stress-inducible protein, putative;	nucleus		cytosol:18433157;cytosol:21166475;mitochondrion:27122571;nucleus:18433157;plasma membrane:17317660;plasma membrane:26781341;vacuole:23903016
AT1G63000	nucleotide-rhamnose synthase/epimerase-reductase;	cytosol		cytosol:21166475;extracellular:26572690;golgi:25900983;golgi:25900983;golgi:25900983;golgi:25900983;plasma membrane:17644812;vacuole:25900983
AT1G63020	nuclear RNA polymerase D1A;Encodes one of two alternative largest subunits of a putative plant-specific RNA polymerase IV (aka RNA polymerase D). Required for posttranscriptional gene silencing.	nucleus
AT1G63050	MBOAT (membrane bound O-acyl transferase) family protein;	endoplasmic reticulum		endoplasmic reticulum:22923678
AT1G63210	Transcription elongation factor Spt6;	nucleus
AT1G63640	P-loop nucleoside triphosphate hydrolases superfamily protein with CH (Calponin Homology) domain;	nucleus		cytoskeleton:24134884;plasma membrane:17317660
AT1G63660	GMP synthase (glutamine-hydrolyzing), putative / glutamine amidotransferase, putative;	cytosol		cytosol:21166475;golgi:25900983;plasma membrane:26781341
AT1G63770	Peptidase M1 family protein;	plastid		extracellular:26572690;mitochondrion:27122571;mitochondrion:27943495;plasma membrane:17644812;plasma membrane:21433285;plastid:12938931;plastid:15028209;plastid:16207701;plastid:21531424;plastid:18431481;plastid:18633119;plastid:21539947;plastid:24361574;vacuole:15215502
AT1G64520	regulatory particle non-ATPase 12A;	cytosol,nucleus		cytosol:14623900;cytosol:21166475;golgi:25900983;golgi:25900983;golgi:25900983;golgi:25900983;golgi:25900983;plasma membrane:19334764;vacuole:23903016;vacuole:25900983
AT1G64550	general control non-repressible 3;member of GCN subfamily	cytosol		cytosol:21166475;golgi:25900983;golgi:25900983;golgi:25900983;golgi:25900983;plasma membrane:19334764;plastid:24872594;vacuole:25900983
AT1G64760	O-Glycosyl hydrolases family 17 protein;	plasma membrane		extracellular:26572690;plasma membrane:14517339;plasma membrane:16602701;plasma membrane:17317660;plasma membrane:17644812;plasma membrane:20843791;plasma membrane:21433285;plasma membrane:22215637;plasma membrane:22318864;plasma membrane:26781341;vacuole:23903016
AT1G64790	ILITYHIA;ILITYHIA (ILA) is a HEAT repeat protein involved in plant immunity. The gene is also involved in systemic acquired resistance induced by P. syringae expressing avrRps4. Loss-of-function mutants of ILA caused pleiotropic defects in the mutant plants. The mutant plants are smaller in size and the leaves are serrated and yellow to light green in color.	golgi		cytosol:18433157;cytosol:20374526;golgi:25900983;golgi:25900983;golgi:25900983;golgi:25900983;golgi:25900983;nucleus:18433157;plasma membrane:19334764;plasma membrane:21433285;vacuole:18686298;vacuole:25900983
AT1G65440	global transcription factor group B1;Related to yeast Spt6 protein, which functions as part of a protein complex in transcription initiation and also plays a role in chromatin structure / assembly.	nucleus		cytosol:21166475;plasma membrane:19334764
AT1G65970	thioredoxin-dependent peroxidase 2;thioredoxin-dependent peroxidase 2	cytosol
AT1G65980	thioredoxin-dependent peroxidase 1;thioredoxin-dependent peroxidase	cytosol		cytosol:21166475;extracellular:26572690;plasma membrane:17644812;plasma membrane:22215637;plasma membrane:26781341;plastid:18431481
AT1G66260	RNA-binding (RRM/RBD/RNP motifs) family protein;	nucleus	nucleus:11432957	cytoskeleton:24134884;extracellular:26572690;golgi:25900983
AT1G66530	Arginyl-tRNA synthetase, class Ic;	cytosol
AT1G66680	S-adenosyl-L-methionine-dependent methyltransferases superfamily protein;unknown function	cytosol
AT1G67630	DNA polymerase alpha 2;	nucleus		mitochondrion:14671022
AT1G67680	SRP72 RNA-binding domain;	nucleus		golgi:25900983;nucleus:23396599;plasma membrane:19334764
AT1G67930	Golgi transport complex protein-related;	golgi		cytosol:21166475;golgi:25900983;golgi:25900983;golgi:25900983;golgi:25900983
AT1G68060	microtubule-associated proteins 70-1;Encodes a microtubule associated protein (MAP70-1). Expressed in all tissues.	cytosol	cytoskeleton:15860013	cytoskeleton:24134884
AT1G68760	nudix hydrolase 1;Encodes a cytosol-localized nudix hydrolase that hydrolyzes 8-oxo-(d)GTP to its monophosphate form. This protective mechanism prevents the misincorporation of these oxidized nucleotides into DNA and RNA. NUDX1 also has a low level of dihydroneopterin triphosphate pyrophosphatase activity in vitro and may participate in the folate synthesis pathway.	cytosol	cytosol:17804481	cytosol:21166475;extracellular:26572690
AT1G69030	BSD domain-containing protein;	nucleus
AT1G69250	Nuclear transport factor 2 (NTF2) family protein with RNA binding (RRM-RBD-RNP motifs) domain;	nucleus		cytoskeleton:24134884;extracellular:26572690
AT1G69410	eukaryotic elongation factor 5A-3;Encodes eIF5A-2, a putative eukaryotic translation initiation factor. There are three eIF5A coding genes in Arabidopsis: eIF5A-1/At1g13950, eIF5A-2/At1g26630 and eIF5A-3/At1g69410.	cytosol		extracellular:26572690;plasma membrane:25641898
AT1G70320	ubiquitin-protein ligase 2;encodes a ubiquitin-protein ligase-like protein containing a HECT domain. There are six other HECT-domain UPLs in Arabidopsis.	cytosol		cytosol:18433157;golgi:25900983;golgi:25900983;golgi:25900983;golgi:25900983;mitochondrion:14671022;nucleus:18433157;plasma membrane:19334764
AT1G70490	Ras-related small GTP-binding family protein;A member of ARF GTPase family. A thaliana has 21 members of this family, known to be essential for vesicle coating and uncoating and functions in GTP-binding. Gene encoding ADP-ribosylation factor and similar to other ARFs and ARF-like proteins. The gene is shown to play a role in cell division, cell expansion and cellulose production using antisense c…	endoplasmic reticulum		golgi:22430844;plasma membrane:17644812;plasma membrane:19334764;plasma membrane:22318864;plastid:24361574
AT1G70660	MMS ZWEI homologue 2;MMZ2/UEV1B encodes a protein that may play a role in DNA damage responses and error-free post-replicative DNA repair by participating in lysine-63-based polyubiquitination reactions. UEV1A can form diubiquitin and triubiquitin chains in combination with UBC13A/UBC35 in vitro. It can also functionally complement an mms2 mutation in budding yeast, both by increasing mms2 mutant…	nucleus
AT1G70770	Protein of unknown function DUF2359, transmembrane;	endoplasmic reticulum		endoplasmic reticulum:16618929;endoplasmic reticulum:22923678;golgi:22430844;golgi:25900983;golgi:25900983;golgi:25900983;golgi:25900983;golgi:25900983;nucleus:23396599;plasma membrane:25641898;plasma membrane:14506206;plasma membrane:15308754;plasma membrane:17317660;plasma membrane:19334764;plasma membrane:20374526;plasma membrane:21433285;plasma membrane:22215637;plasma membrane:23323832;plasm…
AT1G70980	Class II aminoacyl-tRNA and biotin synthetases superfamily protein;	cytosol		cytosol:21166475
AT1G71440	tubulin folding cofactor E / Pfifferling (PFI);Encodes tubulin-folding cofactor E. Mutant embryos consist of one or a few grossly enlarged cells, surrounded by an endosperm that fails to cellularize and contains a few big nuclei.	cytosol		plastid:18431481
AT1G71500	Rieske (2Fe-2S) domain-containing protein;	plastid	plastid:25511433	golgi:25900983;golgi:25900983;golgi:25900983;golgi:25900983;mitochondrion:27943495;plastid:12938931;plastid:14729914;plastid:15028209;plastid:15322131;plastid:21531424;plastid:23851315;plastid:23390424;plastid:24872594;plastid:24361574;plastid:18431481;plastid:20061580;plastid:23667806;plastid:24872594;vacuole:25900983
AT1G71770	poly(A)-binding protein 5;Encodes a Class I polyA-binding protein. Expressed in floral organs. Binds polyA sepharose in vitro.	nucleus		cytosol:18433157;cytosol:21166475;nucleus:18433157;plasma membrane:21433285
AT1G71860	protein tyrosine phosphatase 1;Encodes a protein with tyrosine phosphatase activity that is downregulated in response to cold and upregulated in response to salt stress.	plasma membrane	nucleus:15610358	plasma membrane:14506206;plasma membrane:15308754;plasma membrane:17317660;plasma membrane:17644812;plasma membrane:19334764;plasma membrane:20374526;plasma membrane:22215637;plasma membrane:26781341
AT1G72150	PATELLIN 1;novel cell-plate-associated protein that is related in sequence to proteins involved in membrane trafficking in other eukaryotes	plasma membrane		extracellular:26572690;golgi:22430844;golgi:25900983;golgi:25900983;golgi:25900983;golgi:25900983;golgi:25900983;mitochondrion:27122571;mitochondrion:27943495;nucleus:23396599;plasma membrane:25641898;plasma membrane:15574830;plasma membrane:17317660;plasma membrane:17644812;plasma membrane:19000159;plasma membrane:19334764;plasma membrane:21433285;plasma membrane:22215637;plasma membrane:2231886…
AT1G72550	tRNA synthetase beta subunit family protein;	cytosol		cytosol:21166475
AT1G72730	DEA(D/H)-box RNA helicase family protein;	nucleus		cytosol:18433157;extracellular:16287169;nucleus:23396599;plasma membrane:19334764;plastid:24361574;vacuole:17151019
AT1G73010	phosphate starvation-induced gene 2;	plasma membrane
AT1G73030	SNF7 family protein;Encodes an ESCRT-related protein: CHMP1A/AT1G73030; CHMP1B/AT1G17730. CHMP1A and B mediate multivesicular body sorting of auxin carriers and are required for plant development. ESCRT: Endosomal Sorting Complexes Required For Transport machinery; CHMP: Charged Multivesicular Body Protein/Chromatin Modifying Protein.	nucleus		vacuole:23903016
AT1G73250	GDP-4-keto-6-deoxymannose-3,5-epimerase-4-reductase 1;encodes a bifunctional 3, 5-epimerase-4-reductase in L-fucose synthesis and converts GDP-D-mannose to GDP-L-fucose in vitro along with MUR1 (GDP-D-mannose 4,6-dehydratase). It is expressed in all tissues examined, but most abundantly in roots and flowers.	cytosol		golgi:25900983
AT1G73460	Protein kinase superfamily protein;	nucleus		cytosol:18433157;plasma membrane:17317660
AT1G74040	2-isopropylmalate synthase 1;Encodes an active Arabidopsis isopropylmalate synthase IPMS2. Involved in leucine biosynthesis. Do not participate in the chain elongation of glucosinolates. Expressed constitutively throughout the plant. Loss of IPMS2 can be compensated by a second isopropylmalate synthase gene IPMS1 (At1g18500).	plastid		plasma membrane:19334764;plastid:12938931;plastid:24361574;plastid:24872594;vacuole:25900983
AT1G74910	ADP-glucose pyrophosphorylase family protein;	cytosol		cytosol:21166475;golgi:25900983;golgi:25900983;golgi:25900983;golgi:25900983;peroxisome:12154131;plasma membrane:25641898;plasma membrane:26781341;vacuole:18686298;vacuole:25900983
AT1G75270	dehydroascorbate reductase 2;	cytosol	cytosol:28381499	cytosol:21166475;golgi:25900983;plasma membrane:17644812
AT1G75280	NmrA-like negative transcriptional regulator family protein;isoflavone reductase, putative, identical to SP:P52577 Isoflavone reductase homolog P3 (EC 1.3.1.-) {Arabidopsis thaliana}; contains Pfam profile PF02716: isoflavone reductase. Involved in response to oxidative stress.	cytosol		plasma membrane:17644812
AT1G75780	tubulin beta-1 chain;beta tubulin gene downregulated by phytochrome A (phyA)-mediated far-red light high-irradiance and the phytochrome B (phyB)-mediated red light high-irradiance responses	cytosol		cytoskeleton:24134884;cytosol:28611809;golgi:25900983;golgi:25900983;golgi:25900983;golgi:25900983;golgi:25900983;nucleus:23396599;plasma membrane:19334764;plasma membrane:20843791;plasma membrane:22215637;vacuole:14760709;vacuole:25900983
AT1G75990	PAM domain (PCI/PINT associated module) protein;	cytosol,nucleus		cytosol:14623889;cytosol:21166475;golgi:25900983;golgi:25900983;golgi:25900983;plasma membrane:17317660;plasma membrane:19334764
AT1G76010	Alba DNA/RNA-binding protein;	nucleus		cytoskeleton:24134884;cytosol:21166475;extracellular:26572690;golgi:25900983;golgi:25900983;golgi:25900983;golgi:25900983;golgi:25900983;plasma membrane:25641898;plasma membrane:22318864;plasma membrane:26781341
AT1G76140	Prolyl oligopeptidase family protein;	plastid		extracellular:26572690;mitochondrion:27943495;plastid:18431481;plastid:20061580
AT1G76400	Ribophorin I;	endoplasmic reticulum		endoplasmic reticulum:15295017;endoplasmic reticulum:16618929;endoplasmic reticulum:22923678;golgi:25900983;golgi:25900983;golgi:25900983;plasma membrane:25641898;plasma membrane:19334764;plasma membrane:21433285
AT1G76540	cyclin-dependent kinase B2;1;Encodes a cyclin-dependent protein kinase involved in regulation of the G2/M transition of the mitotic cell cycle. Specifically binds to the cyclin CYCD4;1, expressed in shoot meristem, young leaves and vascular tissue during the G2/M phase. Required for proper organization of the shoot apical meristem and for hormone signaling.	cytosol	cytosol:20018602;nucleus:20018602
AT1G76680	12-oxophytodienoate reductase 1;Encodes a member of an alpha/beta barrel fold family of FMN-containing oxidoreductases. One of the closely related 12-oxophytodienoic acid reductases. This enzyme is not expected to participate in jasmonic acid biosynthesis because during in vitro assays, it shows very little activity with the naturally occurring OPDA isomer. Shows activity towards 2,4,6-trinitroto…	cytosol		cytosol:21166475
AT1G76810	eukaryotic translation initiation factor 2 (eIF-2) family protein;	cytosol		extracellular:26572690;golgi:25900983;golgi:25900983;golgi:25900983;golgi:25900983;plasma membrane:17317660;vacuole:25900983
AT1G76850	exocyst complex component sec5;Encodes a member of the exocyst complex gene family. The exocyst is a protein complex involved in tethering vesicles to the plasma membrane during regulated or polarized secretion.	plasma membrane	cytosol:24307681;plasma membrane:24307681	golgi:25900983;golgi:25900983;golgi:25900983;golgi:25900983;golgi:25900983;plasma membrane:17317660;plasma membrane:17644812;plasma membrane:20374526;plasma membrane:21433285;plasma membrane:22215637;plasma membrane:22318864;plasma membrane:26781341;vacuole:25900983
AT1G77140	vacuolar protein sorting 45;A peripheral membrane protein that associates with microsomal membranes, likely to function in the transport of proteins to the vacuole. It is a member of Sec1p protein family. It may be involved in the regulation of vesicle fusion reactions through interaction with t-SNAREs at the Golgi trans face.	plasma membrane	golgi:21826108	golgi:25900983;golgi:25900983;golgi:21826108;golgi:25900983;plasma membrane:19334764;plasma membrane:21433285;vacuole:25900983
AT1G77510	PDI-like 1-2;Encodes a protein disulfide isomerase-like (PDIL) protein, a member of a multigene family within the thioredoxin (TRX) superfamily. Transcript levels for this gene are up-regulated in response to three different chemical inducers of ER stress (dithiothreitol, beta-mercaptoethanol, and tunicamycin). AtIRE1-2 does not appear to be required for this response, but the atbzip60 mutant has…	endoplasmic reticulum		endoplasmic reticulum:16618929;endoplasmic reticulum:22923678;endoplasmic reticulum:24393051;extracellular:18998720;extracellular:26572690;golgi:22430844;mitochondrion:27122571;mitochondrion:27943495;plasma membrane:25641898;plasma membrane:17644812;plasma membrane:21433285;plasma membrane:22215637;plasma membrane:26781341;plastid:15028209;plastid:18431481;vacuole:17151019
AT1G77540	Acyl-CoA N-acyltransferases (NAT) superfamily protein;Encodes a H3/H4 histone acetyltransferase. Belongs to the GNAT family, whose many members are involved in histone acetylation and chromatin remodeling, and are important for the regulation of cell growth and development.	peroxisome	peroxisome:19329564	peroxisome:19329564;peroxisome:24130194
AT1G77550	tubulin-tyrosine ligases;tubulin-tyrosine ligases;	vacuole		plastid:15028209
AT1G78570	rhamnose biosynthesis 1;Encodes a UDP-L-Rhamnose synthase involved in the biosynthesis of rhamnose, a major monosaccharide component of pectin. Catalyzes the conversion of UDP-D-Glc to UDP-L-Rha. The dehydrogenase domain of RHM1 was shown to catalyze the conversion of UDP-D-Glc to the reaction intermediate UDP-4-keto-6-deoxy-D-Glc using recombinant protein assay but the activity of the full-lengt…	cytosol	cytosol:19056285	cytosol:21166475;golgi:25900983;golgi:25900983;golgi:25900983;golgi:25900983;golgi:25900983;plasma membrane:25641898;plasma membrane:19334764;plasma membrane:26781341;vacuole:25900983
AT1G78850	D-mannose binding lectin protein with Apple-like carbohydrate-binding domain;curculin-like (mannose-binding) lectin family protein, low similarity to ser/thr protein kinase from Zea mays (GI:2598067); contains Pfam lectin (probable mannose binding) domain PF01453 but not the protein kinase domain of the Z. mays protein	extracellular		cytosol:21166475;extracellular:15593128;extracellular:16356755;extracellular:16729891;extracellular:19825673;extracellular:21109274;extracellular:26572690;extracellular:28155257;golgi:22430844;golgi:25900983;mitochondrion:27122571;nucleus:24012629;plasma membrane:19334764;vacuole:17151019
AT1G78870	ubiquitin-conjugating enzyme 35;UBC35/UBC13A encodes a protein that may play a role in DNA damage responses and error-free post-replicative DNA repair by participating in lysine-63-based polyubiquitination reactions. UBC35/UBC13A can form diubiquitin and triubiquitin chains in combination with MMZ1,2,3,4/(UEV1A,B,C,D) in vitro. It can also functionally complement an mms2 ubc13 mutation in budding…	golgi		golgi:25900983;golgi:25900983;golgi:25900983;golgi:25900983;golgi:25900983;plasma membrane:25641898
AT1G79340	metacaspase 4;	cytosol		cytosol:21166475;extracellular:26572690;golgi:25900983;golgi:25900983;plasma membrane:17644812;plasma membrane:19334764;plasma membrane:22215637;plasma membrane:26781341
AT1G79470	Aldolase-type TIM barrel family protein;	cytosol		cytosol:21166475
AT1G79530	glyceraldehyde-3-phosphate dehydrogenase of plastid 1;Encodes one of the chloroplast/plastid localized GAPDH isoforms (GAPCp1/At1g79530 and GAPCp2/At1g16300). gapcp double mutants display a drastic phenotype of arrested root development, dwarfism and sterility. GAPCps are important for the synthesis of serine in roots.	plastid		extracellular:26572690;golgi:25900983;golgi:25900983;mitochondrion:27943495
AT1G79650	Rad23 UV excision repair protein family;Encodes a member of the RADIATION SENSITIVE23 (RAD23) family: AT1G16190(RAD23A), AT1G79650(RAD23B), AT3G02540(RAD23C), AT5G38470(RAD23D). RAD23 proteins play an essential role in the cell cycle, morphology, and fertility of plants through their delivery of UPS (ubiquitin/26S proteasome system) substrates to the 26S proteasome.	nucleus
AT1G79830	golgin candidate 5;This gene is predicted to encode a protein that functions as a Golgi apparatus structural component known as a golgin in mammals and yeast. A fluorescently-tagged version of GC5 co-localizes with Golgi markers, and this localization appears to be replicated using the C-terminal (139 aa) portion of the protein. The C-terminal portion of the protein can also specifically interact…	golgi	golgi:18182439	nucleus:14617066;plasma membrane:21433285
AT1G79990	structural molecules;	endoplasmic reticulum		cytosol:21166475;golgi:25900983;nucleus:23396599
AT1G80380	P-loop containing nucleoside triphosphate hydrolases superfamily protein;encodes a glycerate kinase which catalyzes the last step of photorespiration C2 cycle.	plastid		golgi:25900983;golgi:25900983;golgi:25900983;golgi:25900983;nucleus:23396599;plastid:12938931;plastid:21531424;plastid:25740923;plastid:18433418;plastid:23549413;plastid:24361574;vacuole:25900983
AT1G80410	tetratricopeptide repeat (TPR)-containing protein;	cytosol		cytoskeleton:24134884;cytosol:21166475;golgi:25900983;golgi:25900983;golgi:25900983;golgi:25900983;nucleus:23396599;plasma membrane:25641898;plasma membrane:19334764;plasma membrane:22215637;vacuole:25900983
AT1G80480	plastid transcriptionally active 17;	plastid		golgi:25900983;golgi:25900983;golgi:25900983;plastid:20423899;plastid:21531424;plastid:26987276;plastid:18431481;plastid:18633119;plastid:20061580;plastid:23549413;plastid:24361574;plastid:24872594
AT2G01190	Octicosapeptide/Phox/Bem1p family protein;	nucleus		extracellular:26572690
AT2G01350	quinolinate phoshoribosyltransferase;At2g01350 encodes quinolinate phosphoribosyl transferase involved in NAD biosynthesis as shown by heterologous expression in E. coli.	plastid	plastid:16698895	golgi:25900983;plastid:18431481;plastid:20061580;plastid:20061580
AT2G01650	plant UBX domain-containing protein 2;encodes a peripheral membrane protein that contains UBX domain and interacts with AtCDC48 in vitro and co-fractionates with membrane-associated but not soluble AtCDC48 in vivo.	nucleus
AT2G01690	ARM repeat superfamily protein;	golgi		golgi:25900983;golgi:25900983;golgi:25900983;plasma membrane:19334764;vacuole:17151019
AT2G01720	Ribophorin I;	endoplasmic reticulum		endoplasmic reticulum:16618929;endoplasmic reticulum:22923678;extracellular:16287169;golgi:25900983;golgi:25900983;golgi:25900983;golgi:25900983;nucleus:23396599;plasma membrane:25641898;plasma membrane:15574830;plasma membrane:17317660;plasma membrane:19334764;plasma membrane:26781341;plastid:14729914;vacuole:17151019;vacuole:25900983
AT2G01970	Endomembrane protein 70 protein family;	golgi		extracellular:16287169;golgi:16618929;golgi:22430844;golgi:22923678;golgi:25900983;golgi:25122472;golgi:25900983;golgi:25900983;mitochondrion:27943495;plasma membrane:21433285;vacuole:17151019;vacuole:25900983
AT2G02100	low-molecular-weight cysteine-rich 69;Predicted to encode a PR (pathogenesis-related) protein. Belongs to the plant defensin (PDF) family with the following members: At1g75830/PDF1.1, At5g44420/PDF1.2a, At2g26020/PDF1.2b, At5g44430/PDF1.2c, At2g26010/PDF1.3, At1g19610/PDF1.4, At1g55010/PDF1.5, At2g02120/PDF2.1, At2g02100/PDF2.2, At2g02130/PDF2.3, At1g61070/PDF2.4, At5g63660/PDF2.5, At2g02140/PDF2…	extracellular		extracellular:16287169;extracellular:26572690;plasma membrane:17317660;plasma membrane:17644812;plasma membrane:21433285
AT2G02130	low-molecular-weight cysteine-rich 68;Predicted to encode a PR (pathogenesis-related) protein. Belongs to the plant defensin (PDF) family with the following members: At1g75830/PDF1.1, At5g44420/PDF1.2a, At2g26020/PDF1.2b, At5g44430/PDF1.2c, At2g26010/PDF1.3, At1g19610/PDF1.4, At1g55010/PDF1.5, At2g02120/PDF2.1, At2g02100/PDF2.2, At2g02130/PDF2.3, At1g61070/PDF2.4, At5g63660/PDF2.5, At2g02140/PDF2…	extracellular		extracellular:26572690;extracellular:28155257;plasma membrane:21433285
AT2G02500	Nucleotide-diphospho-sugar transferases superfamily protein;Encodes a protein with 4-Diphosphocytidyl-2C-methyl-D-erythritol synthase activity. The enzyme has an absolute requirement for divalent cations (Mg2+ reaches the highest catalytic activity).	plastid	plastid:in house	extracellular:26572690;plastid:16207701;plastid:20423899;plastid:21531424;plastid:18431481;plastid:18633119;plastid:20061580;plastid:24361574
AT2G02560	cullin-associated and neddylation dissociated;Arabidopsis thaliana homolog of human CAND1 (cullin-associated and neddylation-dissociated). Putative similarity to TBP-interacting protein TIP120. Ubiquitously expressed in plant tissues throughout development. T-DNA insertion mutant plants were completely sterile and resistant to sirtinol and auxin, but not to gibberellins or brassinolide. Displayed…	cytosol		cytosol:21166475;golgi:25900983;golgi:25900983;golgi:25900983;plasma membrane:17644812;plasma membrane:21433285;vacuole:25900983
AT2G02760	ubiquiting-conjugating enzyme 2;ubiquitin conjugating enzyme UBC2. Homolog of the yeast RAD6 gene.	nucleus		cytosol:21166475
AT2G02790	IQ-domain 29;	nucleus		cytoskeleton:24134884;plasma membrane:17317660;plasma membrane:21433285;plasma membrane:26781341
AT2G03270	DNA-binding protein, putative;	nucleus
AT2G03390	uvrB/uvrC motif-containing protein;	plastid		plastid:18431481;plastid:24361574
AT2G03430	Ankyrin repeat family protein;	cytosol		plasma membrane:22318864
AT2G03510	SPFH/Band 7/PHB domain-containing membrane-associated protein family;	endoplasmic reticulum		endoplasmic reticulum:16618929;endoplasmic reticulum:22923678;golgi:22430844;golgi:25900983;golgi:25900983;nucleus:14505352;nucleus:15496452;nucleus:24012629;plasma membrane:25641898;plasma membrane:19334764;plasma membrane:22215637;vacuole:17151019
AT2G03640	Nuclear transport factor 2 (NTF2) family protein with RNA binding (RRM-RBD-RNP motifs) domain;	nucleus		cytoskeleton:24134884
AT2G03820	nonsense-mediated mRNA decay NMD3 family protein;	golgi		cytosol:21166475;golgi:25900983;golgi:25900983;golgi:25900983;golgi:25900983;golgi:25900983;plasma membrane:19334764;vacuole:25900983
AT2G04030	Chaperone protein htpG family protein;Encodes a chloroplast-targeted 90-kDa heat shock protein located in the stroma involved in red-light mediated deetiolation response. Mutants are resistant to chlorate, have elongated hypocotyls in light, and affect the expression of NR2, CAB, and RBCS but NOT NR1 and NiR.	plastid	plastid:18368500	golgi:25900983;golgi:25900983;golgi:25900983;golgi:25900983;golgi:25900983;mitochondrion:11743115;mitochondrion:14671022;mitochondrion:17137349;nucleus:23396599;plasma membrane:19334764;plasma membrane:20843791;plasma membrane:21433285;plastid:12938931;plastid:15028209;plastid:16207701;plastid:20423899;plastid:21531424;plastid:22923678;plastid:23851315;plastid:18431481;plastid:18633119;plastid:20…
AT2G04350	AMP-dependent synthetase and ligase family protein;	endoplasmic reticulum		endoplasmic reticulum:16618929;endoplasmic reticulum:22923678;golgi:22430844;plasma membrane:20843791;plasma membrane:21433285;plastid:20061580
AT2G04650	ADP-glucose pyrophosphorylase family protein;	cytosol
AT2G05830	NagB/RpiA/CoA transferase-like superfamily protein;	cytosol		cytosol:25587034;golgi:25900983;golgi:25900983;golgi:25900983;plasma membrane:25641898
AT2G05990	NAD(P)-binding Rossmann-fold superfamily protein;Encodes enoyl-ACP reductase a component of the fatty acid synthase complex. A reduced function mutation in this gene, mod1, was found in a screen for premature cell death mutants. Mutant plants have reduced lipid level and pleiotropic morphological defects, including chlorotic and abnormally shaped leaves.	plastid		extracellular:26572690;golgi:25900983;mitochondrion:24727099;mitochondrion:27943495;plastid:11826309;plastid:12938931;plastid:14729914;plastid:15028209;plastid:16207701;plastid:20423899;plastid:21531424;plastid:23851315;plastid:18431481;plastid:18633119;plastid:20061580;plastid:24361574;plastid:24872594
AT2G06850	xyloglucan endotransglucosylase/hydrolase 4;endoxyloglucan transferase (EXGT-A1) gene	extracellular	extracellular:15610358	cytosol:28611809;extracellular:15593128;extracellular:16287169;extracellular:16356755;extracellular:21109274;extracellular:24393051;extracellular:26572690;extracellular:28155257;extracellular:25852701;golgi:25900983;golgi:25900983;golgi:25900983;golgi:25900983;golgi:25900983;mitochondrion:27943495;plasma membrane:19334764;plasma membrane:21433285;plastid:15028209;vacuole:25900983
AT2G06990	RNA helicase, ATP-dependent, SK12/DOB1 protein;encodes a putative DExH-box RNA helicase that acts redundantly with HEN1, HUA1, and HUA2 in the specification of floral organ identity in the third whorl.	nucleus		cytosol:21166475
AT2G07050	cycloartenol synthase 1;Involved in the biosynthesis of brassinosteroids. Catalyzes the reaction from epoxysqualene to cycloartenol.	golgi		golgi:25900983;golgi:25900983;golgi:25900983;golgi:25900983;golgi:25900983;mitochondrion:27943495;plasma membrane:19334764;plasma membrane:21433285;plasma membrane:22215637;vacuole:15215502;vacuole:15539469;vacuole:23903016;vacuole:25900983
AT2G07360	SH3 domain-containing protein;	plasma membrane	cytosol:24134884	cytoskeleton:24134884;cytosol:18433157;golgi:25900983;golgi:25900983;golgi:25900983;golgi:25900983;nucleus:18433157;nucleus:23396599;plasma membrane:17317660;plasma membrane:19334764;plasma membrane:20374526;plasma membrane:21433285;plasma membrane:22215637;plasma membrane:26781341;vacuole:25900983
AT2G13540	ARM repeat superfamily protein;Encodes a nuclear cap-binding protein that forms a heterodimeric complex with CBP20 and is involved in ABA signaling and flowering. Mutants are early flowering and exhibit hypersensitive response to ABA in germination inhibition.Loss of ABH1 function results in abnormal processing of mRNAs for several important floral regulators (FLC, CO, FLM). Analysis of loss of f…	cytosol	nucleus:12427994;nucleus:24689873
AT2G14120	dynamin related protein;Encodes a dynamin related protein. DRPs are self-assembling GTPasse involved in fission and fusion of membranes. DRP3B functions in mitochondrion and peroxisome fission in combination with DRP3A.	cytosol	cytosol:18559960;mitochondrion:14988495	cytosol:21166475;golgi:25900983;golgi:25900983;golgi:25900983;golgi:25900983;nucleus:23396599;plasma membrane:17317660;plasma membrane:17644812;plasma membrane:19334764;plasma membrane:21433285;vacuole:23903016;vacuole:25900983
AT2G14720	vacuolar sorting receptor 4;encodes a vacuolar sorting receptor	vacuole	golgi:15632053;golgi:21826108;plasma membrane:20807880;vacuole:16980567;vacuole:20807880	extracellular:26572690;golgi:22430844;golgi:22923678;golgi:25900983;golgi:25122472;golgi:25900983;golgi:25900983;nucleus:23396599;plasma membrane:25641898;plasma membrane:21433285;plasma membrane:22215637;plasma membrane:22318864
AT2G14740	vaculolar sorting receptor 3;Encodes a vacuolar sorting receptor that participates in vacuolar sorting in vegetative tissues and in seeds.	vacuole	vacuole:16980567	golgi:22430844;golgi:22923678;golgi:25122472;plasma membrane:19334764;vacuole:25900983
AT2G15430	DNA-directed RNA polymerase family protein;Non-catalytic subunit of nuclear DNA-dependent RNA polymerases II, IV and V; homologous to budding yeast RPB3 and the E. coli RNA polymerase alpha subunit. A closely related paralog, encoded by At2g15400, can substitute for At2g15430 in the context of Pol V.	nucleus	nucleus:15610358	nucleus:27177187;nucleus:23396599
AT2G15790	peptidyl-prolyl cis-trans isomerase / cyclophilin-40 (CYP40) / rotamase;SQN encodes the Arabidopsis homolog of cyclophilin 40 (CyP40). It is specifically required for the vegetative but not the reproductive maturation of the shoot.	cytosol		cytosol:21166475
AT2G15860	;	cytosol		cytosol:21166475;golgi:25900983;golgi:25900983;golgi:25900983;plasma membrane:21433285
AT2G16600	rotamase CYP 3;Encodes cytosolic cyclophilin ROC3.	cytosol	cytosol:24130194;cytosol:24440291;unclear:24440291	cytosol:21166475;extracellular:26572690;golgi:22430844;mitochondrion:27943495;peroxisome:19329564;plasma membrane:25641898;plasma membrane:15574830;plasma membrane:17644812;plasma membrane:19334764;plasma membrane:22215637;plasma membrane:22318864;plasma membrane:26781341;plastid:24361574
AT2G16950	transportin 1;Nuclear import receptor for AtGRP7.	nucleus		cytosol:21166475;golgi:25900983;golgi:25900983;golgi:25900983;golgi:25900983;golgi:25900983;plasma membrane:21433285;vacuole:25900983
AT2G17280	Phosphoglycerate mutase family protein;	cytosol		cytosol:21166475
AT2G17290	Calcium-dependent protein kinase family protein;Encodes calcium dependent protein kinase 6 (CPK6), a member of the Arabidopsis CDPK gene family. CDPKs contain an intrinsic Ca2+-activation domain with four EF hand Ca2+-binding sites. CDPKs protein kinases have been proposed to function in multiple plant signal transduction pathways downstream of [Ca2+]cyt elevations, thus transducing various physi…	cytosol	cytosol:24280384	cytosol:18433157;plasma membrane:17317660;plasma membrane:19334764;plasma membrane:26781341
AT2G17340	Uncharacterised conserved protein (UCP030210);	cytosol
AT2G17380	associated protein 19;Encodes clathrin assembly protein AP19.	mitochondrion
AT2G17390	ankyrin repeat-containing 2B;Highly homologous to AKR2A. Involved in chloroplast biogenesis. Double mutants of AKR2A and AKR2B have yellow leaves, significantly reduced chloroplast proteins, and no thylakoid membranes.	nucleus		plasma membrane:17317660;plastid:20061580
AT2G17840	Senescence/dehydration-associated protein-related;Identified as drought-inducible gene by differential hybridization. Upregulated by high light, drought, cold and salt stress determined by microarray analysis.	cytosol		cytosol:28611809;extracellular:26572690;golgi:25900983;golgi:25900983;golgi:25900983;mitochondrion:27122571;plasma membrane:14506206;plasma membrane:15308754;plasma membrane:19334764;vacuole:25900983
AT2G17980	Sec1/munc18-like (SM) proteins superfamily;member of SLY1 Gene Family	plasma membrane		cytosol:21166475;golgi:25900983;golgi:25900983;golgi:25900983;golgi:25900983;golgi:25900983;plasma membrane:21433285
AT2G18110	Translation elongation factor EF1B/ribosomal protein S6 family protein;	cytosol		cytosol:21166475;cytosol:22522809;golgi:25900983;golgi:25900983;golgi:25900983
AT2G18510	RNA-binding (RRM/RBD/RNP motifs) family protein;	nucleus		nucleus:15496452;plasma membrane:19334764
AT2G18790	phytochrome B;Red/far-red photoreceptor involved in the regulation of de-etiolation. Exists in two inter-convertible forms: Pr and Pfr (active). Involved in the light-promotion of seed germination and in the shade avoidance response.	nucleus	cytosol:10225946;cytosol:12119373;nucleus:10225946;nucleus:11089975;nucleus:12119373;nucleus:15753105;nucleus:15965119;nucleus:23371951
AT2G19480	nucleosome assembly protein 1;2;This gene is predicted to encode a nucleosome assembly protein. Plant lines expressing an RNAi construct directed against this gene show a reduction in agrobacterium-mediated root transformation.	nucleus	cytosol:24012629;nucleus:24012629	cytosol:21166475;extracellular:26572690;golgi:25900983;golgi:25900983;nucleus:24012629;nucleus:23396599;plasma membrane:25641898;plasma membrane:17317660;plasma membrane:21433285;plasma membrane:22215637;plasma membrane:26781341
AT2G19760	profilin 1;first member of the Arabidopsis profilin multigene family, expressed in all organs of Arabidopsis. Binds poly-L-proline. The first intron of PRF1 enhances gene expression in vegetative tissues.	cytosol	cytoskeleton:19200149	cytosol:21166475;extracellular:26572690;plasma membrane:17644812;plasma membrane:22215637;plasma membrane:26781341;plastid:24361574
AT2G20490	nucleolar RNA-binding Nop10p family protein;	nucleus	nucleus:15133128	cytoskeleton:24134884;nucleus:15496452;plasma membrane:19334764
AT2G20580	26S proteasome regulatory subunit S2 1A;encoding the RPN subunits of the 26S proteasome	cytosol,nucleus		cytosol:14623884;cytosol:21166475;extracellular:26572690;golgi:25900983;golgi:25900983;golgi:25900983;golgi:25900983;golgi:25900983;nucleus:23396599;plasma membrane:25641898;plasma membrane:17317660;plasma membrane:19334764;plasma membrane:21433285;plasma membrane:26781341
AT2G20630	PP2C induced by AVRRPM1;	cytosol		extracellular:26572690;mitochondrion:27943495;plasma membrane:25641898;plasma membrane:22215637
AT2G20890	photosystem II reaction center PSB29 protein;Chloroplast-localized Thylakoid formation1 gene product involved in vesicle-mediated formation of thylakoid membranes. Thf1 antisense lines contain abnormal chloroplasts early in leaf development (chloroplasts have loosely stacked thylakoid membranes). Expression was induced in the light and decreased under dark conditions. G-alpha interaction partner …	plastid	plastid:15516501;plastid:19224954	golgi:25900983;golgi:25900983;golgi:25900983;golgi:25900983;mitochondrion:27122571;mitochondrion:27943495;plasma membrane:19334764;plastid:12938931;plastid:15028209;plastid:15322131;plastid:16207701;plastid:19676087;plastid:20423899;plastid:21531424;plastid:23549413;plastid:23851315;plastid:18431481;plastid:20061580;plastid:24872594;plastid:18431481;plastid:18633119;plastid:24361574;plastid:18431…
AT2G20990	synaptotagmin A;Encodes a plasma membrane localized protein with similarity to synaptotagmins, a class of membrane trafficking proteins. SYT1 is expressed in all tissues. Loss of function mutations show hypersensitivity to NaCl and electrolyte leakage from the plasma membrane. SYT1 also affects calcium dependent freezing tolerance. SYT1 probably plays a role in membrane repair such as membrane re…	plasma membrane,endoplasmic reticulum	endoplasmic reticulum:20498364;endoplasmic reticulum:25792253;golgi:20498364;plasma membrane:19088329;plasma membrane:20133785;plasma membrane:20498364;plasma membrane:25792253	endoplasmic reticulum:22923678;golgi:25900983;golgi:25900983;golgi:25900983;golgi:25900983;golgi:25900983;nucleus:23396599;plasma membrane:25641898;plasma membrane:15574830;plasma membrane:17317660;plasma membrane:17644812;plasma membrane:19334764;plasma membrane:21433285;plasma membrane:22215637;plasma membrane:22318864;plasma membrane:23990937;plasma membrane:26781341;vacuole:15539469;vacuole:2…
AT2G21130	Cyclophilin-like peptidyl-prolyl cis-trans isomerase family protein;	cytosol		cytosol:21166475;plasma membrane:17644812;plasma membrane:22318864;plastid:24361574
AT2G21160	Translocon-associated protein (TRAP), alpha subunit;	endoplasmic reticulum		endoplasmic reticulum:16618929;endoplasmic reticulum:22923678;golgi:22430844;golgi:25900983;golgi:25900983;golgi:25900983;golgi:25900983;golgi:25900983;plasma membrane:25641898;plasma membrane:15574830;plasma membrane:17317660;plasma membrane:17644812;plasma membrane:19334764;plasma membrane:22215637;plasma membrane:26781341;plastid:15322131;vacuole:15215502;vacuole:15539469;vacuole:17151019
AT2G21250	NAD(P)-linked oxidoreductase superfamily protein;	cytosol		cytosol:21166475;extracellular:26572690;mitochondrion:27122571;plasma membrane:26781341
AT2G21390	Coatomer, alpha subunit;	cytosol		cytosol:21166475;golgi:25900983;golgi:25900983;golgi:25900983;golgi:25900983;golgi:25900983;mitochondrion:27943495;nucleus:23396599;plasma membrane:21433285;plasma membrane:26781341;vacuole:25900983
AT2G21510	DNAJ heat shock N-terminal domain-containing protein;	cytosol
AT2G21660	cold, circadian rhythm, and rna binding 2;Encodes a small glycine-rich RNA binding protein that is part of a negative-feedback loop through which AtGRP7 regulates the circadian oscillations of its own transcript. Gene expression is induced by cold. GRP7 appears to promote stomatal opening and reduce tolerance under salt and dehydration stress conditions, but, promotes stomatal closing and thereby…	nucleus	cytosol:21453442;nucleus:14756317;nucleus:21453442;nucleus:24130194	cytosol:21166475;extracellular:26572690;golgi:25900983;golgi:25900983;golgi:25900983;golgi:25900983;golgi:25900983;nucleus:24012629;nucleus:27177187;nucleus:23396599;peroxisome:17951448;peroxisome:19329564;plasma membrane:25641898;plasma membrane:15574830;plasma membrane:19334764;plasma membrane:22215637;plasma membrane:26781341;plastid:24872594;plastid:20061580
AT2G22125	binding;	plasma membrane		golgi:25900983;golgi:25900983;golgi:25900983;golgi:25900983;golgi:25900983;plasma membrane:25641898;plasma membrane:17644812;plasma membrane:19334764;plasma membrane:21433285;plasma membrane:26781341;vacuole:25900983
AT2G22300	signal responsive 1;Encodes a putative CAM binding transcription factor. Loss of function mutations show enhanced resistance to fungal and bacterial pathogens suggesting that CAMTA functions to suppress defense responses.	nucleus		vacuole:18686298
AT2G22360	DNAJ heat shock family protein;	plastid		golgi:25900983;nucleus:23396599;plasma membrane:19334764;plastid:15322131;plastid:20423899;plastid:21531424;plastid:23851315;plastid:26987276;plastid:20061580;plastid:24872594;plastid:24872594;plastid:18431481;plastid:23667806;vacuole:25900983
AT2G22450	riboflavin biosynthesis protein, putative;	plastid	plastid:23203051	plastid:18431481;plastid:20061580
AT2G22480	phosphofructokinase 5;	plastid		plastid:20423899;plastid:24361574
AT2G23350	poly(A) binding protein 4;polyadenylate-binding protein, putative / PABP, putative.Member of the Class II family of PABP proteins. Highly and ubiquitously expressed.	cytosol		cytosol:21166475;plasma membrane:19334764;plasma membrane:21433285;plasma membrane:22215637
AT2G24050	MIF4G domain-containing protein / MA3 domain-containing protein;Encodes a putative eukaryotic translation initiation factor.	nucleus		cytosol:21166475;extracellular:26572690;plasma membrane:21433285;plastid:21531424
AT2G24490	replicon protein A2;Encodes a component of Replication Protein A. Component of transcriptional gene silencing which does not affect endogenous small RNA accumulation nor DNA methylation. Localized in the nucleus. Involved in DNA repair. Interacts physically with ROS1.	nucleus	nucleus:in house	extracellular:26572690
AT2G25080	glutathione peroxidase 1;Encodes glutathione peroxidase.	plastid	plastid:28102911	extracellular:26572690;golgi:25900983;mitochondrion:27943495;plasma membrane:25641898;plastid:12766230;plastid:12938931;plastid:15028209;plastid:15322131;plastid:20423899;plastid:21531424;plastid:20061580;plastid:24872594;plastid:18431481;plastid:18633119;plastid:20061580;plastid:24361574;plastid:24872594;plastid:20061580;plastid:24872594
AT2G25280	;	cytosol		plasma membrane:19334764
AT2G25800	Protein of unknown function (DUF810);	plasma membrane		golgi:25900983;golgi:25900983;plasma membrane:19334764;plasma membrane:22215637;plasma membrane:22318864;plasma membrane:26781341
AT2G25910	3'-5' exonuclease domain-containing protein / K homology domain-containing protein / KH domain-containing protein;	cytosol
AT2G26590	regulatory particle non-ATPase 13;	cytosol
AT2G26670	Plant haem oxygenase (decyclizing) family protein;Encodes a plastid heme oxygenase necessary for phytochrome chromophore biosynthesis and for coupling the expression of some nuclear genes to the functional state of the chloroplast.	plastid	plastid:10072395;plastid:19860740	plastid:18431481;plastid:20423899;plastid:21531424;plastid:20061580;plastid:24361574
AT2G26990	proteasome family protein;Represses photomorphogenesis and induces skotomorphogenesis in the dark.	nucleus		cytosol:21166475
AT2G27600	AAA-type ATPase family protein;Encodes a SKD1 (Suppressor of K+ Transport Growth Defect1) homolog. Localized to the cytoplasm and to multivesicular endosomes. Involved in multivesicular endosome function.	cytosol		golgi:25900983;golgi:25900983;golgi:25900983;golgi:25900983
AT2G27860	UDP-D-apiose/UDP-D-xylose synthase 1;Encodes UDP-d-apiose/UDP-d-xylose synthase that requires NAD+ for enzymatic activity and is strongly inhibited by UDP-d-galacturonate.	cytosol		cytosol:21166475;plasma membrane:26781341;vacuole:25900983
AT2G27960	cyclin-dependent kinase-subunit 1;catalytic subunit of cyclin dependent kinase 1. physically interact with cyclin-dependent kinases (CDKs) and play an essential, but yet not entirely resolved, role in the regulation of the cell cycle	cytosol	cytosol:20018602;cytosol:in house;nucleus:20018602;nucleus:in house
AT2G27970	CDK-subunit 2;	nucleus	cytosol:20018602;nucleus:20018602
AT2G28520	vacuolar proton ATPase A1;Vacuolar proton ATPase subunit VHA-a isoform 1. Localized in the trans-Golgi network.	golgi	endoplasmic reticulum:16461582;golgi:16461582;golgi:17306539;golgi:23532067	golgi:22430844;golgi:22923678;golgi:25900983;golgi:25122472;golgi:25900983;golgi:25900983;golgi:25900983;golgi:21826108;golgi:25900983;plasma membrane:20843791;plasma membrane:21433285;vacuole:25900983;vacuole:26748395
AT2G29190	pumilio 2;Encodes a member of the Arabidopsis Pumilio (APUM) proteins containing PUF domain (eight repeats of approximately 36 amino acids each). PUF proteins regulate both mRNA stability and translation through sequence-specific binding to the 3' UTR of target mRNA transcripts.	cytosol,nucleus		cytosol:21166475;plasma membrane:21433285
AT2G29440	glutathione S-transferase tau 6;Encodes glutathione transferase belonging to the tau class of GSTs. Naming convention according to Wagner et al. (2002).	cytosol		cytosol:21166475
AT2G29550	tubulin beta-7 chain;Encodes a beta-tubulin that is expressed in leaves, roots and flowers.	cytosol		cytoskeleton:24134884;cytosol:21166475;golgi:22430844;golgi:25900983;golgi:25900983;golgi:25900983;golgi:25900983;golgi:25900983;mitochondrion:21896887;nucleus:14505352;plasma membrane:17317660;plasma membrane:19334764;plasma membrane:21433285;plasma membrane:22215637;plasma membrane:22923678;plasma membrane:26781341;vacuole:14760709;vacuole:25900983
AT2G29700	pleckstrin homologue 1;Encodes a protein containing one PH (pleckstrin homology) domain with a short N-terminal extension	cytosol
AT2G29960	cyclophilin 5;encodes a cyclophilin protein that exhibits peptidylprolyl cis/trans-isomerase and protein refolding activities that were sensitive to cyclosporin A. The protein interacts with GNOM in vitro and is localized to both the cytosolic and membrane fractions. The gene is expressed in the developing embryo.	endoplasmic reticulum	endoplasmic reticulum:10189705	endoplasmic reticulum:16618929;endoplasmic reticulum:22923678;plasma membrane:25641898;plasma membrane:26781341
AT2G30050	transducin family protein / WD-40 repeat family protein;	cytosol,nucleus	cytosol:21189294;nucleus:15496452;nucleus:21189294	golgi:25900983;golgi:25900983;golgi:25900983;golgi:25900983;golgi:25900983;nucleus:15496452;vacuole:25900983
AT2G30060	Pleckstrin homology (PH) domain superfamily protein;	nucleus		extracellular:26572690
AT2G30110	ubiquitin-activating enzyme 1;Encodes a ubiquitin-activating enzyme (E1), involved in the first step in conjugating multiple ubiquitins to proteins targeted for degradation. Gene is expressed in most tissues examined. Mutant is able to revert the constitutive defense responses phenotype of snc1, which indicates the gene is involved in defense response. It also indicates that ubiquitination plays …	cytosol		cytosol:21166475;golgi:25900983;mitochondrion:27122571;plasma membrane:17317660;plasma membrane:19334764;plasma membrane:21433285;plasma membrane:22215637
AT2G30140	UDP-Glycosyltransferase superfamily protein;	cytosol		cytosol:21166475
AT2G30490	cinnamate-4-hydroxylase;Encodes a cinnamate-4-hydroxylase. Mutations in this gene impact phenylpropanoid metabolism, growth and development.	endoplasmic reticulum	endoplasmic reticulum:21515817;endoplasmic reticulum:23175744	endoplasmic reticulum:15295017;endoplasmic reticulum:16618929;endoplasmic reticulum:22923678;extracellular:16287169;golgi:22430844;golgi:25900983;golgi:25900983;golgi:25900983;golgi:25900983;golgi:25900983;plasma membrane:25641898;plasma membrane:17317660;plasma membrane:17644812;plasma membrane:19334764;plasma membrane:21433285;plasma membrane:22215637;plasma membrane:23323832;plasma membrane:26…
AT2G31370	Basic-leucine zipper (bZIP) transcription factor family protein;	nucleus
AT2G31660	ARM repeat superfamily protein;SAD2 (super sensitive to ABA and drought 2) encodes an importin beta-domain family protein likely to be involved in nuclear transport in ABA signaling. Subcellular localization of GFP-tagged SAD2 showed a predominantly nuclear localization, consistent with a role for SAD2 in nuclear transport. Mutation of SAD2 in Arabidopsis alters abscisic acid sensitivity. SAD2 wa…	cytosol,nucleus	cytosol:16889648;nucleus:16889648	cytosol:21166475;golgi:25900983;golgi:25900983;golgi:25900983;golgi:25900983;golgi:25900983;vacuole:25900983
AT2G31810	ACT domain-containing small subunit of acetolactate synthase protein;	plastid		golgi:25900983;golgi:25900983;golgi:25900983;golgi:25900983;golgi:25900983;nucleus:27177187;plasma membrane:19334764;plastid:18431481;plastid:20423899;plastid:21531424;plastid:20061580;vacuole:25900983
AT2G32260	phosphorylcholine cytidylyltransferase;	cytosol		plasma membrane:19334764
AT2G32730	26S proteasome regulatory complex, non-ATPase subcomplex, Rpn2/Psmd1 subunit;	cytosol,nucleus		cytosol:14623886;cytosol:18433157;cytosol:21166475;golgi:25900983;golgi:25900983;golgi:25900983;golgi:25900983;golgi:25900983;nucleus:18433157;plasma membrane:19334764;plasma membrane:21433285;plasma membrane:22318864;vacuole:23903016;vacuole:25900983
AT2G32920	PDI-like 2-3;Encodes a protein disulfide isomerase-like (PDIL) protein, a member of a multigene family within the thioredoxin (TRX) superfamily. Transcript levels for this gene are up-regulated in response to three different chemical inducers of ER stress (dithiothreitol, beta-mercaptoethanol, and tunicamycin). AtIRE1-2 does not appear to be required for this response, but the atbzip60 mutant has…	endoplasmic reticulum		endoplasmic reticulum:15295017;endoplasmic reticulum:16618929;endoplasmic reticulum:22923678;extracellular:26572690;golgi:22430844;golgi:25900983;golgi:25900983;golgi:25900983;golgi:25900983;nucleus:23396599;plasma membrane:25641898;plasma membrane:17317660;plasma membrane:19334764;plasma membrane:22215637;plasma membrane:26781341;plastid:24872594;vacuole:23903016;vacuole:25900983
AT2G33120	synaptobrevin-related protein 1;Encodes a member of Synaptobrevin -like protein family.	plasma membrane	cytosol:22022536;golgi:22022536;plasma membrane:15342965;plasma membrane:18273019;unclear:15610358	golgi:25900983;golgi:25900983;golgi:25900983;golgi:25900983;golgi:25900983;plasma membrane:14506206;plasma membrane:15060130;plasma membrane:22215637;plasma membrane:22318864;plasma membrane:23990937;vacuole:17151019
AT2G33410	RNA-binding (RRM/RBD/RNP motifs) family protein;	nucleus
AT2G33470	glycolipid transfer protein 1;	golgi		cytosol:21166475;golgi:25900983;golgi:25900983;golgi:25900983;golgi:25900983;golgi:25900983;plasma membrane:17644812;plasma membrane:19334764;plasma membrane:22215637
AT2G33845	Nucleic acid-binding, OB-fold-like protein;	nucleus		cytoskeleton:24134884;plasma membrane:19334764
AT2G34690	Glycolipid transfer protein (GLTP) family protein;Gene product transports the glycolipid precursor sphingosine between membranes in vitro. Mutant constitutively expresses defense-related genes that accompany the hypersensitive response normally triggered by avirulent pathogens.	golgi,plasma membrane
AT2G34970	Trimeric LpxA-like enzyme;	cytosol		cytosol:21166475;golgi:25900983;golgi:25900983;golgi:25900983;nucleus:23396599
AT2G35630	ARM repeat superfamily protein;Member of the MAP215 family of microtubule-associated proteins required to establish interphase arrays of cortical microtubules.Mutants have defects in cytokinesis during pollen development. Vegetative phenotypes observed in temperature sensitive mutants include left-handed organ twisting, isotropic cell expansion and impairment of root hair polarity.	golgi		cytoskeleton:24134884;golgi:25900983;golgi:25900983;golgi:25900983;golgi:25900983;plasma membrane:19334764;plasma membrane:26781341
AT2G36060	MMS ZWEI homologue 3;MMZ3/UEV1C encodes a protein that may play a role in DNA damage responses and error-free post-replicative DNA repair by participating in lysine-63-based polyubiquitination reactions. UEV1C can form diubiquitin and triubiquitin chains in combination with UBC13A/UBC35 in vitro. It can also functionally complement an mms2 mutation in budding yeast, both by increasing mms2 mutant…	cytosol		cytosol:21166475;mitochondrion:27943495;plasma membrane:19334764
AT2G36130	Cyclophilin-like peptidyl-prolyl cis-trans isomerase family protein;	cytosol		cytoskeleton:24134884;cytosol:21166475;nucleus:23396599
AT2G36880	methionine adenosyltransferase 3;	cytosol		cytosol:21166475;cytosol:28611809;extracellular:26572690;golgi:25900983;golgi:25900983;golgi:25900983;golgi:25900983;golgi:25900983;nucleus:14505352;plasma membrane:25641898;plasma membrane:17317660;plasma membrane:19334764;plasma membrane:26781341;plastid:21531424;plastid:24361574;vacuole:25900983
AT2G37220	RNA-binding (RRM/RBD/RNP motifs) family protein;Encodes a chloroplast RNA binding protein. A substrate of the type III effector HopU1 (mono-ADP-ribosyltransferase). Protein is tyrosine-phosphorylated and its phosphorylation state is modulated in response to ABA in Arabidopsis thaliana seeds.	plastid		extracellular:26572690;golgi:25900983;golgi:25900983;golgi:25900983;golgi:25900983;plastid:11826309;plastid:12938931;plastid:14729914;plastid:16207701;plastid:16648217;plastid:20423899;plastid:21531424;plastid:25740923;plastid:26987276;plastid:24872594;plastid:16923014;plastid:18431481;plastid:18633119;plastid:20061580;plastid:21539947;plastid:24361574;plastid:24872594;plastid:20061580;plastid:24…
AT2G37550	ARF-GAP domain 7;A member of ARF GAP domain (AGD), A thaliana has 15 members, grouped into four classes.	golgi	golgi:23266962	cytosol:18433157;golgi:25900983;golgi:25900983;nucleus:18433157
AT2G37760	NAD(P)-linked oxidoreductase superfamily protein;	cytosol		cytosol:21166475;mitochondrion:27122571
AT2G38610	RNA-binding KH domain-containing protein;	nucleus		cytosol:21166475
AT2G38680	5'-nucleotidases;magnesium ion binding;	cytosol		cytosol:21166475
AT2G38700	mevalonate diphosphate decarboxylase 1;Encodes mevalonate diphosphate decarboxylase, the enzyme that catalyzes the synthesis of isopentenyl diphosphate, used in sterol and isoprenoid biosynthesis. The protein appears to form a homodimeric complex. Incidentally, it was shown that the Arabidopsis MVD protein could also interact with its yeast homolog to form a heterodimer.	cytosol	peroxisome:21655959	cytosol:21166475;extracellular:26572690
AT2G38710	AMMECR1 family;	cytosol		cytosol:21166475
AT2G38720	microtubule-associated protein 65-5;	cytosol	cytoskeleton:15469496;cytoskeleton:15557096;cytoskeleton:18667529	cytoskeleton:24134884
AT2G38730	Cyclophilin-like peptidyl-prolyl cis-trans isomerase family protein;	cytosol		cytosol:21166475;extracellular:26572690;plasma membrane:17644812
AT2G38760	annexin 3;Annexins are calcium binding proteins that are localized in the cytoplasm. When cytosolic Ca2+ increases, they relocate to the plasma membrane.	cytosol,plasma membrane		plasma membrane:19334764;plasma membrane:22215637;plasma membrane:26781341;vacuole:15539469
AT2G38770	P-loop containing nucleoside triphosphate hydrolases superfamily protein;	cytosol		golgi:25900983;golgi:25900983;nucleus:23396599;plasma membrane:17317660;plasma membrane:21433285;plastid:15028209
AT2G38960	endoplasmic reticulum oxidoreductins 2;endoplasmic reticulum oxidoreductin	endoplasmic reticulum		endoplasmic reticulum:16618929;endoplasmic reticulum:22923678
AT2G39050	hydroxyproline-rich glycoprotein family protein;	nucleus		plasma membrane:20843791
AT2G39260	binding;RNA binding;	nucleus		cytoskeleton:24134884;golgi:25900983;golgi:25900983;golgi:25900983;golgi:25900983;golgi:25900983;plasma membrane:21433285
AT2G39730	rubisco activase;Rubisco activase, a nuclear-encoded chloroplast protein that consists of two isoforms arising from alternative splicing in most plants. Required for the light activation of rubisco.	plastid		golgi:25900983;golgi:25900983;golgi:25900983;golgi:25900983;golgi:21826108;golgi:25900983;mitochondrion:27122571;mitochondrion:27943495;nucleus:14617066;nucleus:23396599;plasma membrane:25641898;plasma membrane:19334764;plasma membrane:22215637;plasma membrane:26781341;plastid:12766230;plastid:12938931;plastid:15028209;plastid:15322131;plastid:16207701;plastid:16648217;plastid:20423899;plastid:21…
AT2G39770	Glucose-1-phosphate adenylyltransferase family protein;Encodes a GDP-mannose pyrophosphorylase/ mannose-1-pyrophosphatase. This enzyme provides GDP-mannose, which is used for cell wall carbohydrate biosynthesis and protein glycosylation as well as for ascorbate (vitamin C) biosynthesis. Mutations in this gene confer hypersensitivity to NH4+.	cytosol		cytosol:21166475;golgi:25900983;golgi:25900983;golgi:25900983;plasma membrane:25641898;vacuole:25900983
AT2G39960	Microsomal signal peptidase 25 kDa subunit (SPC25);	endoplasmic reticulum		endoplasmic reticulum:16618929;endoplasmic reticulum:22923678;plasma membrane:22215637
AT2G39990	eukaryotic translation initiation factor 2;translation initiation factor eIF2 p47 subunit homolog	cytosol,nucleus	cytosol:15610358;nucleus:15610358	cytosol:21166475;golgi:25900983;golgi:25900983;golgi:25900983;golgi:25900983;nucleus:14617066;nucleus:23396599;plasma membrane:26781341;vacuole:25900983
AT2G40290	Eukaryotic translation initiation factor 2 subunit 1;	cytosol		cytoskeleton:24134884;cytosol:21166475;extracellular:26572690;golgi:25900983;golgi:25900983;nucleus:14617066;plasma membrane:19334764
AT2G40550	E2F target gene 1;Encodes a nuclear localized target of E2Fa-DPa, transcription factors controlling cell cycle progression. Required for sister chromatid cohesion and DNA repair.	nucleus		plastid:12938931
AT2G40600	appr-1-p processing enzyme family protein;	plastid		cytosol:21166475;mitochondrion:27943495
AT2G40660	Nucleic acid-binding, OB-fold-like protein;	cytosol		cytoskeleton:24134884;cytosol:21166475;cytosol:22522809;nucleus:23396599;plasma membrane:19334764;plasma membrane:26781341
AT2G40730	Protein kinase family protein with ARM repeat domain;	golgi		golgi:25900983;golgi:25900983;golgi:25900983;golgi:25900983;golgi:25900983;vacuole:25900983
AT2G40840	disproportionating enzyme 2;Encodes a cytosolic protein with transglucosidase and amylomaltase activity. It is an essential component of the pathway from starch to sucrose and cellular metabolism in leaves at night. The protein binds to heteroglycans and utilizes glucose, mannose and xylose as acceptors. Fucose and galactose can also act as acceptors but less efficiently than the previous three. …	cytosol	cytosol:20700743	cytosol:21166475;plasma membrane:25641898;plasma membrane:19334764;plasma membrane:21433285
AT2G41100	Calcium-binding EF hand family protein;encodes a calmodulin-like protein, with six potential calcium binding domains. Calcium binding shown by Ca(2+)-specific shift in electrophoretic mobility. Expression induced by touch and darkness. Expression may also be developmentally controlled. Expression in growing regions of roots, vascular tissue, root/shoot junctions, trichomes, branch points of the s…	cytosol		plasma membrane:22215637;vacuole:17151019
AT2G41430	dehydration-induced protein (ERD15);Encodes hydrophilic protein lacking Cys residues that is expressed in response to drought stress, light stress and treatment with plant-growth-promoting rhizobacteria (Paenibacillus polymyxa), possibly revealing a connection between responses to biotic and abiotic stress. Also identified as a CTC Interacting Domain (CID) protein in a yeast two hybrid screen usi…	cytosol	cytosol:10737809
AT2G41480	Peroxidase superfamily protein;	mitochondrion,endoplasmic reticulum
AT2G41740	villin 2;Encodes a protein with high homology to animal villin.	cytosol	cytoskeleton:10631247;cytoskeleton:23715472	extracellular:26572690;golgi:25900983;golgi:25900983;plasma membrane:19334764;plasma membrane:26781341
AT2G41790	Insulinase (Peptidase family M16) family protein;	peroxisome		peroxisome:18931141;peroxisome:19329564
AT2G42230	C-CAP/cofactor C-like domain-containing protein;	cytosol
AT2G42520	P-loop containing nucleoside triphosphate hydrolases superfamily protein;	nucleus	unclear:24130194	golgi:25900983;golgi:25900983;golgi:25900983;golgi:25900983;golgi:25900983;peroxisome:17951448;peroxisome:19329564;plasma membrane:25641898;plasma membrane:19334764;plasma membrane:21433285;vacuole:25900983
AT2G43160	ENTH/VHS family protein;	plasma membrane		plasma membrane:17317660;plasma membrane:21433285;plasma membrane:26781341;plastid:23851315;plastid:23667806;vacuole:17151019
AT2G43770	Transducin/WD40 repeat-like superfamily protein;	nucleus		nucleus:24832081;nucleus:27177187;nucleus:23396599
AT2G43910	HARMLESS TO OZONE LAYER 1;	cytosol	cytosol:19224954	extracellular:26572690;golgi:25900983;plasma membrane:25641898;plasma membrane:17644812;plasma membrane:22215637;plasma membrane:26781341;plastid:24361574
AT2G43940	S-adenosyl-L-methionine-dependent methyltransferases superfamily protein;	peroxisome		extracellular:26572690;peroxisome:19329564;plastid:12938931;plastid:15028209
AT2G44160	methylenetetrahydrofolate reductase 2;methylenetetrahydrofolate reductase MTHFR2 mRNA, complete	cytosol		cytosol:21166475;plasma membrane:19334764;plasma membrane:21433285;plasma membrane:26781341
AT2G44450	beta glucosidase 15;	extracellular		extracellular:14595688;extracellular:16287169;extracellular:16356755;extracellular:16729891;extracellular:26572690;extracellular:28155257;golgi:22430844;plasma membrane:21433285
AT2G45000	structural constituent of nuclear pore;	nucleus	cytosol:26728150;nucleus:21189294	cytosol:21166475;golgi:25900983
AT2G45140	plant VAP homolog 12;Encodes a Plant VAMP-Associated protein that localizes to the ER and binds to the sitosterol-binding protein ORP3a. The WFDE motif in ORP3a appears to be important for this direct interaction. Mutation of this motif causes ORP3a to relocalize to the Golgi and cytosol. The interaction between PVA12 and ORP3a does not appear to be sterol-dependent.	endoplasmic reticulum	endoplasmic reticulum:27159525;plasma membrane:27159525	cytosol:18433157;endoplasmic reticulum:16618929;extracellular:26572690;golgi:25900983;golgi:25900983;golgi:25900983;golgi:25900983;golgi:25900983;nucleus:18433157;plasma membrane:14506206;plasma membrane:15308754;plasma membrane:17317660;plasma membrane:17644812;plasma membrane:22215637;vacuole:25900983
AT2G45200	golgi snare 12;Encodes a member of the GOS1 (Golgi SNARE) gene family.	golgi	golgi:15342965	cytosol:18433157;cytosol:20374526;golgi:22923678;golgi:25900983;golgi:25900983;golgi:25900983;plasma membrane:19334764;vacuole:15539469
AT2G45240	methionine aminopeptidase 1A;Encodes a cytoplasmic MAP1 like methionine aminopeptidase which is involved in removing the N-terminal methionine from proteins. Induced mutants using RNAi technology which knocks out both MAP1 and MAP2 like genes show abnormal development.	cytosol	cytosol:11060042	cytoskeleton:24134884;cytosol:21166475;plasma membrane:19334764
AT2G45290	Transketolase;	plastid		extracellular:26572690;mitochondrion:27122571;plasma membrane:19334764;plasma membrane:21433285;plastid:15028209;plastid:18431481;plastid:21531424;plastid:22923678;plastid:23851315;plastid:18633119;plastid:20061580;plastid:24361574
AT2G45300	RNA 3'-terminal phosphate cyclase/enolpyruvate transferase, alpha/beta;encodes 3-phosphoshikimate 1-carboxyvinyltransferase / 5-enolpyruvylshikimate-3-phosphate / EPSP synthase involved in chorismate biosynthesis	plastid	plastid:11489193	extracellular:26572690;plastid:18431481;plastid:20423899;plastid:21531424;plastid:20061580;plastid:24361574
AT2G45330	RNA 2'-phosphotransferase, Tpt1 / KptA family;	plastid		plastid:24872594
AT2G45540	WD-40 repeat family protein / beige-related;	golgi		golgi:25900983;golgi:25900983;golgi:25900983;plasma membrane:19334764;plastid:20061580
AT2G45630	D-isomer specific 2-hydroxyacid dehydrogenase family protein;	plastid
AT2G45790	phosphomannomutase;encodes a phosphomannomutase, involved in ascorbate biosynthesis	mitochondrion,cytosol		cytosol:21166475;nucleus:24012629;plasma membrane:25641898;plasma membrane:19334764;plasma membrane:22215637
AT2G45990	;	plastid	plastid:19224954	plastid:16207701;plastid:20423899;plastid:21531424;plastid:23851315;plastid:18431481;plastid:20061580;plastid:24361574
AT2G46280	TGF-beta receptor interacting protein 1;Encodes a homolog of mammalian TGF-beta receptor interacting protein. Co-immunoprecipitates with BRI1 and can be phosphorylated in vitro by BRI1 at specific sites (Thr-14, Thr-89, and either Thr-197 or Ser-198). May therefore be a cytoplasmic BRI1 substrate and involved in brassinosteroid regulated plant growth and development.The encoded protein has two DW…	cytosol		cytosol:21166475;golgi:25900983;golgi:25900983;golgi:25900983;golgi:25900983;golgi:25900983;nucleus:24012629;nucleus:27177187;plasma membrane:25641898;plasma membrane:22215637;plasma membrane:26781341;vacuole:25900983
AT2G46520	cellular apoptosis susceptibility protein, putative / importin-alpha re-exporter, putative;	cytosol,nucleus		cytosol:21166475;golgi:25900983;golgi:25900983;golgi:25900983;golgi:25900983;golgi:25900983;mitochondrion:27122571;plasma membrane:21433285;vacuole:25900983
AT2G46890	Protein of unknown function (DUF1295);	plasma membrane
AT2G47170	Ras-related small GTP-binding family protein;Gene encoding ADP-ribosylation factor and similar to other ARFs and ARF-like proteins. Members of this family are known to be essential for vesicle coating and uncoating and functions in GTP-binding. The gene is shown to play a role in cell division, cell expansion and cellulose production using antisense construct.	golgi	cytosol:17307898;endoplasmic reticulum:15659621;golgi:12182707;golgi:15659621;golgi:16553898;golgi:17307898;golgi:24369434;golgi:24369434	golgi:22430844;plasma membrane:15574830;plasma membrane:22215637;plastid:24361574
AT2G47320	Cyclophilin-like peptidyl-prolyl cis-trans isomerase family protein;	peroxisome	peroxisome:10737809	golgi:22430844;plasma membrane:25641898
AT2G47390	Prolyl oligopeptidase family protein;	plastid		cytoskeleton:24134884;extracellular:26572690;mitochondrion:27943495;peroxisome:19329564;plastid:15028209;plastid:16207701;plastid:20423899;plastid:21531424;plastid:18431481;plastid:18633119;plastid:20061580;plastid:24361574
AT2G47470	thioredoxin family protein;Encodes a protein disulfide isomerase-like (PDIL) protein, a member of a multigene family within the thioredoxin (TRX) superfamily. Transcript levels for this gene are up-regulated in response to three different chemical inducers of ER stress (dithiothreitol, beta-mercaptoethanol, and tunicamycin). AtIRE1-2 does not appear to be required for this response, but the atbzi…	endoplasmic reticulum	endoplasmic reticulum:18931141;endoplasmic reticulum:19050167	endoplasmic reticulum:16618929;endoplasmic reticulum:22923678;extracellular:16287169;extracellular:26572690;golgi:25900983;golgi:25900983;mitochondrion:27943495;nucleus:24012629;plasma membrane:25641898;plasma membrane:19334764;plasma membrane:22215637;plasma membrane:26781341;vacuole:17151019;vacuole:23903016
AT2G47680	zinc finger (CCCH type) helicase family protein;	plastid		golgi:25900983;golgi:25900983;plasma membrane:19334764;plastid:15028209
AT2G47960	;	golgi		golgi:25900983;golgi:25900983;golgi:25900983;golgi:21826108;golgi:25900983;plasma membrane:19334764;vacuole:25900983
AT2G47970	Nuclear pore localisation protein NPL4;	cytosol		cytosol:21166475
AT3G01340	Transducin/WD40 repeat-like superfamily protein;	cytosol,nucleus		cytosol:21166475;golgi:25900983;golgi:25900983;golgi:25900983
AT3G02040	senescence-related gene 3;	cytosol
AT3G02200	Proteasome component (PCI) domain protein;	cytosol,nucleus		golgi:25900983;golgi:25900983;golgi:25900983;golgi:25900983;golgi:25900983;vacuole:25900983
AT3G02260	auxin transport protein (BIG);Calossin-like protein required for polar auxin transport	nucleus		cytosol:21166475;golgi:25900983;golgi:25900983;golgi:25900983;golgi:25900983;golgi:25900983;plasma membrane:19334764
AT3G02360	6-phosphogluconate dehydrogenase family protein;	peroxisome	cytosol:17951448	cytoskeleton:24134884;cytosol:21166475;extracellular:26572690;mitochondrion:27122571;peroxisome:17951448;peroxisome:18931141;peroxisome:19329564;peroxisome:24130194;plasma membrane:25641898;plasma membrane:22215637;plasma membrane:26781341;plastid:20061580;plastid:24361574
AT3G02530	TCP-1/cpn60 chaperonin family protein;	cytosol	cytosol:15610358	cytosol:21166475;extracellular:26572690;golgi:25900983;golgi:25900983;golgi:25900983;golgi:25900983;golgi:25900983;mitochondrion:27122571;mitochondrion:27943495;plasma membrane:19334764;plasma membrane:26781341;vacuole:25900983
AT3G02760	Class II aaRS and biotin synthetases superfamily protein;	cytosol		cytosol:21166475;nucleus:23396599
AT3G02920	Replication protein A, subunit RPA32;	nucleus
AT3G03250	UDP-GLUCOSE PYROPHOSPHORYLASE 1;Is thought to encode a cytosolic UDP-glucose pyrophosphorylase with strong similarity to potato UTP--glucose-1-phosphate uridylyltransferase. Downregulated by flooding.	cytosol		cytosol:21166475;extracellular:26572690;golgi:25900983;golgi:25900983;plasma membrane:25641898;plasma membrane:17644812;plasma membrane:19334764;plasma membrane:22215637;plasma membrane:26781341;plastid:24361574;vacuole:23903016;vacuole:25900983
AT3G03380	DegP protease 7;Encodes a putative DegP protease.	golgi	plastid:20089771	cytosol:21166475;golgi:25900983;golgi:25900983
AT3G03960	TCP-1/cpn60 chaperonin family protein;	cytosol		cytosol:21166475;extracellular:26572690;golgi:25900983;golgi:25900983;golgi:25900983;golgi:25900983;golgi:25900983;mitochondrion:27122571;nucleus:23396599;plasma membrane:25641898;plasma membrane:19334764;plasma membrane:21433285;plasma membrane:26781341;vacuole:25900983
AT3G04600	Nucleotidylyl transferase superfamily protein;	cytosol		cytosol:21166475;golgi:25900983;golgi:25900983;golgi:25900983;golgi:25900983;nucleus:23396599;vacuole:25900983
AT3G04710	ankyrin repeat family protein;	cytosol
AT3G04780	Protein of unknown function (DUF1000);Encodes a protein with little sequence identity with any other protein of known structure or function. Part of this protein shows a 42% sequence identity with the C-terminal domain of the 32-kD human thioredoxin-like protein.	cytosol		extracellular:26572690
AT3G04820	Pseudouridine synthase family protein;	mitochondrion	peroxisome:10737809
AT3G04830	Protein prenylyltransferase superfamily protein;	endoplasmic reticulum		endoplasmic reticulum:22923678;golgi:22430844;golgi:25900983;golgi:25900983;plasma membrane:25641898;plasma membrane:15574830;plasma membrane:19334764;vacuole:25900983
AT3G04880	DNA-damage-repair/toleration protein (DRT102);encodes a novel protein involved in DNA repair from UV damage. Isolated by functional complementation of E. coli UV-sensitive mutants (UVR genes).	cytosol	cytosol:15610358;nucleus:15610358	cytosol:21166475;nucleus:14617066
AT3G05420	acyl-CoA binding protein 4;Acyl-CoA binding protein with high affinity for oleoyl-CoA. Expressed in all plant organs. Involved in fatty acid transport.	cytosol	cytosol:18836139	cytosol:21166475
AT3G05530	regulatory particle triple-A ATPase 5A;Encodes RPT5a (Regulatory Particle 5a), one of the six AAA-ATPases of the proteasome regulatory particle. Essential for gametophyte development. In Arabidopsis, the RPT5 subunit is encoded by two highly homologous genes, RPT5a and RPT5b. RPT5a and RPT5b show accession-dependent functional redundancy. In Wassilewskija (Ws) accession: mutant alleles of RPT5a d…	cytosol,nucleus	cytosol:15610358;nucleus:15610358	cytoskeleton:24134884;cytosol:21166475;golgi:25900983;golgi:25900983;golgi:25900983;golgi:25900983;golgi:25900983;plasma membrane:22215637;plasma membrane:22318864;plasma membrane:26781341;vacuole:23903016;vacuole:25900983
AT3G06580	Mevalonate/galactokinase family protein;Encodes a protein with galactose kinase activity. The gene was shown to complement the yeast Ägal1 mutant defective in the galactokinase gene GAL1.	cytosol		cytosol:21166475;golgi:25900983;plasma membrane:26781341
AT3G06650	ATP-citrate lyase B-1;One of the two genes encoding subunit B of the trimeric enzyme ATP Citrate lyase	cytosol		cytoskeleton:24134884;cytosol:21166475;extracellular:26572690;golgi:25900983;golgi:25900983;golgi:25900983;golgi:25900983;golgi:25900983;plasma membrane:25641898;plasma membrane:19334764;plasma membrane:22215637;plasma membrane:26781341;vacuole:25900983
AT3G06720	importin alpha isoform 1;Encodes importin alpha involved in nuclear import. Protein interacts with Agrobacterium proteins VirD2 and VirE2. Is not individually essential for Agrobacterium-mediated root transformation, but when overexpressed can rescue the impa-4 decreased transformation susceptibility phenotype.	nucleus	cytosol:22623495	cytoskeleton:24134884;cytosol:18433157;cytosol:21166475;golgi:25900983;golgi:25900983;golgi:25900983;golgi:25900983;golgi:25900983;nucleus:15496452;plasma membrane:21433285;plasma membrane:26781341;vacuole:25900983
AT3G06930	protein arginine methyltransferase 4B;Encodes an type I protein arginine methyltransferase. PRMT4b can catalyze the asymmetric dimethylation of arginines 2,17, and 26 on histone 3 and can also methylate myelin basic protein in vitro. Double mutants lacking PRMT4a and 4b have reduced levels of histone 3 methylated at R17. These double mutants flower late due to defects in the autonomous pathway an…	cytosol
AT3G07050	GTP-binding family protein;	nucleus	nucleus:26163696	golgi:25900983;nucleus:15496452;nucleus:27177187;nucleus:23396599;plasma membrane:19334764
AT3G07100	Sec23/Sec24 protein transport family protein;Encodes SEC24a/ERMO2. Required for endoplasmic reticulum (ER) morphology.	endoplasmic reticulum	golgi:16553898;unclear:16553898	golgi:25900983;golgi:25900983;golgi:25900983;golgi:25900983;golgi:25900983;plasma membrane:19334764;plasma membrane:21433285;plasma membrane:26781341;vacuole:25900983
AT3G07300	NagB/RpiA/CoA transferase-like superfamily protein;	cytosol
AT3G07410	RAB GTPase homolog A5B;	cytosol		golgi:25900983;golgi:21826108;plasma membrane:15060130;plasma membrane:17644812
AT3G07640	;	cytosol		golgi:25900983
AT3G07720	Galactose oxidase/kelch repeat superfamily protein;	cytosol	cytosol:15610358;nucleus:15610358	cytosol:21166475;extracellular:26572690
AT3G07880	Immunoglobulin E-set superfamily protein;	cytosol		extracellular:26572690
AT3G08030	Protein of unknown function, DUF642;	extracellular		extracellular:15593128;extracellular:16356755;extracellular:16729891;extracellular:21109274;extracellular:24393051;extracellular:25805245;extracellular:26572690;extracellular:28155257;golgi:25900983;golgi:25900983;golgi:25900983;golgi:25900983;golgi:25900983;mitochondrion:27122571;plasma membrane:21433285;plasma membrane:22923678;vacuole:25900983
AT3G08510	phospholipase C 2;Phosphoinositide-specific phospholipase C (PI-PLC), catalyzes hydrolysis of phosphatidylinositol 4,5-bisphosphate into inositol 1,4,5-trisphosphate and diacylglycerol.	plasma membrane		golgi:25900983;golgi:25900983;golgi:25900983;golgi:25900983;plasma membrane:25641898;plasma membrane:14506206;plasma membrane:15308754;plasma membrane:15574830;plasma membrane:16635983;plasma membrane:17317660;plasma membrane:17644812;plasma membrane:19334764;plasma membrane:20374526;plasma membrane:20843791;plasma membrane:21433285;plasma membrane:22215637;plasma membrane:22318864;plasma membran…
AT3G08530	Clathrin, heavy chain;	plasma membrane		cytosol:21166475;extracellular:26572690;golgi:22430844;golgi:25900983;golgi:25900983;golgi:25900983;golgi:25900983;golgi:25900983;nucleus:23396599;plasma membrane:15574830;plasma membrane:17317660;plasma membrane:19334764;plasma membrane:20843791;plasma membrane:21433285;plasma membrane:22318864;plasma membrane:22923678;plasma membrane:23323832;plasma membrane:26781341;plastid:15028209;plastid:18…
AT3G08943	ARM repeat superfamily protein;	cytosol,nucleus		cytosol:21166475;golgi:25900983;golgi:25900983;golgi:25900983;golgi:25900983;golgi:25900983;vacuole:25900983
AT3G09300	OSBP(oxysterol binding protein)-related protein 3B;	cytosol		cytosol:21166475
AT3G09350	Fes1A;Encodes one of the Arabidopsis orthologs of the human Hsp70-binding protein 1 (HspBP-1) and yeast Fes1p: Fes1A (AT3G09350), Fes1B (AT3G53800), Fes1C (AT5G02150). Fes1A is cytosolic and associates with cytosolic Hsp70. Mutants showed increased heat-sensitive phenotype suggestion the involvement of Fes1A in acquired thermotolerance. Does not have nucleotide exchange factor activity in vitro.	cytosol	cytosol:21443605;nucleus:21443605	vacuole:23903016
AT3G09440	Heat shock protein 70 (Hsp 70) family protein;	cytosol		cytoskeleton:24134884;cytosol:21166475;cytosol:22522809;extracellular:26572690;golgi:22430844;golgi:25900983;golgi:25900983;golgi:25900983;golgi:25900983;golgi:25900983;mitochondrion:24727099;mitochondrion:27943495;nucleus:14505352;plasma membrane:25641898;plasma membrane:17317660;plasma membrane:17644812;plasma membrane:19334764;plasma membrane:20843791;plasma membrane:21433285;plasma membrane:2…
AT3G09800	SNARE-like superfamily protein;	cytosol
AT3G09840	cell division cycle 48;Encodes a cell division cycle protein, a member of AAA-type ATPases gene family. Expressed throughout the plant in regions of cell division. Within the cell, sub-cellular localization varies depending on the stage of the cell cycle.Mutants in which the expression of CDC48A is altered show defects in cytokinesis, cell expansion and cell differentiation.	cytosol	cytosol:17693538;nucleus:17693538;plasma membrane:17693538	cytosol:21166475;extracellular:26572690;golgi:22430844;golgi:25900983;golgi:25900983;mitochondrion:27943495;nucleus:27177187;plasma membrane:25641898;plasma membrane:16473966;plasma membrane:17317660;plasma membrane:17644812;plasma membrane:21433285;plasma membrane:22215637;plasma membrane:26781341;vacuole:23903016
AT3G10220	tubulin folding cofactor B;Encodes a tubulin-binding cofactor. Homozygous mutant plants are embryo lethal. Heterozygous mutant plants showed increased ploidy and higher numbers of spindles and phragmoplasts, suggesting a role in cell division.	cytosol	cytosol:12225668;cytosol:16928693	nucleus:14617066
AT3G10300	Calcium-binding EF-hand family protein;	plasma membrane		plasma membrane:15574830
AT3G10380	subunit of exocyst complex 8;Subunit of the Putative Arabidopsis Exocyst Complex	plasma membrane	cytosol:20870962;cytosol:24307681;cytosol:20870962;plasma membrane:20870962;plasma membrane:23283982;plasma membrane:24307681	golgi:25900983;golgi:25900983;golgi:25900983;golgi:25900983;golgi:25900983;plasma membrane:25641898;plasma membrane:17317660;plasma membrane:17644812;plasma membrane:19334764;plasma membrane:21433285;plasma membrane:22215637;plasma membrane:22318864;plasma membrane:26781341;vacuole:25900983
AT3G11130	Clathrin, heavy chain;	plasma membrane		golgi:22430844;golgi:25900983;golgi:25900983;golgi:25900983;golgi:25900983;golgi:25900983;nucleus:23396599;plasma membrane:25641898;plasma membrane:15574830;plasma membrane:17317660;plasma membrane:17644812;plasma membrane:19334764;plasma membrane:21433285;plasma membrane:22215637;plasma membrane:22923678;plasma membrane:23323832;plasma membrane:26781341;vacuole:14760709;vacuole:17151019;vacuole:…
AT3G11270	Mov34/MPN/PAD-1 family protein;	cytosol,nucleus	nucleus:26980300	cytosol:14623895
AT3G11330	plant intracellular ras group-related LRR 9;Encodes PIRL9, a member of the Plant Intracellular Ras-group-related LRRs (Leucine rich repeat proteins). PIRLs are a distinct, plant-specific class of intracellular LRRs that likely mediate protein interactions, possibly in the context of signal transduction. PIRL1 (AT5G05850) and PIRL9 (AT3G11330) are genetically redundant and are required for differe…	plastid
AT3G11400	eukaryotic translation initiation factor 3G1;One of the 2 genes that code for the G subunit of eukaryotic initiation factor 3 (EIF3).	cytosol		extracellular:26572690;golgi:25900983;plasma membrane:17317660;plasma membrane:26781341
AT3G11710	lysyl-tRNA synthetase 1;	cytosol		cytosol:21166475;extracellular:26572690;nucleus:23396599;plasma membrane:19334764;plasma membrane:21433285;vacuole:23903016
AT3G11830	TCP-1/cpn60 chaperonin family protein;	cytosol		cytosol:21166475;extracellular:26572690;golgi:25900983;golgi:25900983;golgi:25900983;golgi:25900983;nucleus:23396599;plasma membrane:25641898;plasma membrane:19334764;plasma membrane:21433285;plasma membrane:22215637;vacuole:25900983
AT3G11910	ubiquitin-specific protease 13;	cytosol	cytosol:23645632;nucleus:23645632	cytosol:21166475;extracellular:26572690;golgi:25900983;plasma membrane:26781341
AT3G12050	Aha1 domain-containing protein;	cytosol	peroxisome:10737809	cytosol:21166475;golgi:25900983;golgi:25900983;golgi:25900983;golgi:25900983;golgi:25900983;plasma membrane:19334764;vacuole:25900983
AT3G12110	actin-11;Encodes an actin that is expressed predominantly during reproductive development.	cytosol		cytoskeleton:24134884;golgi:25900983;golgi:25900983;golgi:25900983;mitochondrion:14671022;mitochondrion:27122571;nucleus:23396599;plasma membrane:17317660;plasma membrane:20843791;plasma membrane:26781341;plastid:20061580;plastid:20061580;vacuole:25900983
AT3G12270	protein arginine methyltransferase 3;	nucleus		cytosol:21166475
AT3G12580	heat shock protein 70;	cytosol	plastid:26669598	cytosol:21166475;cytosol:22522809;golgi:22430844;golgi:25900983;golgi:25900983;golgi:25900983;golgi:25900983;golgi:25900983;mitochondrion:17137349;nucleus:23396599;plasma membrane:17317660;plasma membrane:17644812;plasma membrane:19334764;plasma membrane:21433285;plasma membrane:22215637;plasma membrane:26781341;plastid:24361574;vacuole:17151019;vacuole:23903016;vacuole:25900983
AT3G12600	nudix hydrolase homolog 16;	cytosol		extracellular:26572690
AT3G12760	;	cytosol
AT3G12780	phosphoglycerate kinase 1;nuclear phosphoglycerate kinase (PGK1)	plastid	cytosol:15610358;plastid:19036033	cytosol:21166475;golgi:25900983;golgi:25900983;golgi:25900983;golgi:25900983;golgi:25900983;mitochondrion:14671022;mitochondrion:27122571;mitochondrion:27943495;nucleus:14617066;nucleus:23396599;plasma membrane:25641898;plasma membrane:19334764;plasma membrane:22215637;plasma membrane:26781341;plastid:15028209;plastid:16207701;plastid:16648217;plastid:20423899;plastid:21531424;plastid:23851315;pl…
AT3G13060	evolutionarily conserved C-terminal region 5;	nucleus		cytosol:21166475
AT3G13224	RNA-binding (RRM/RBD/RNP motifs) family protein;	cytosol
AT3G13300	Transducin/WD40 repeat-like superfamily protein;Encodes VCS (VARICOSE). Involved in mRNA decapping. VCS forms a mRNA decapping complex with DCP1 (At1g08370) and DCP2 (At5g13570). Unlike DCP2, VCS itself does not have mRNA decapping activity in vitro. DCP1, DCP2 and VCS colocalize in cytoplasmic loci, which are putative Arabidopsis mRNA processing bodies. Null mutants of DCP1, DCP2, and VCS accumu…	cytosol		cytoskeleton:24134884;cytosol:18433157;cytosol:21166475;extracellular:26572690;golgi:25900983;golgi:25900983;golgi:25900983;golgi:25900983;golgi:25900983;nucleus:18433157;plasma membrane:19334764;plasma membrane:21433285;vacuole:25900983
AT3G13460	evolutionarily conserved C-terminal region 2;Physically interacts with CIPK1.	cytosol	cytosol:15610358;nucleus:15610358	cytosol:21166475;plasma membrane:21433285
AT3G13920	eukaryotic translation initiation factor 4A1;eukaryotic translation initiation factor 4A-1	cytosol		cytosol:18433157;cytosol:21166475;cytosol:25587034;golgi:25900983;golgi:25900983;golgi:25900983;golgi:25900983;golgi:25900983;mitochondrion:27122571;mitochondrion:27943495;nucleus:15496452;nucleus:23396599;plasma membrane:25641898;plasma membrane:19334764;plasma membrane:26781341;plastid:24361574;vacuole:23903016;vacuole:25900983
AT3G13990	Kinase-related protein of unknown function (DUF1296);	cytosol	cytosol:24134884	cytoskeleton:24134884;cytosol:20374526;extracellular:28155257;plasma membrane:21433285
AT3G14100	RNA-binding (RRM/RBD/RNP motifs) family protein;	nucleus
AT3G14790	rhamnose biosynthesis 3;	cytosol		cytosol:21166475
AT3G15010	RNA-binding (RRM/RBD/RNP motifs) family protein;	nucleus	nucleus:12837943;nucleus:15496452	extracellular:26572690;nucleus:15496452
AT3G15180	ARM repeat superfamily protein;	cytosol,nucleus		vacuole:17151019
AT3G15610	Transducin/WD40 repeat-like superfamily protein;	cytosol		cytosol:21166475
AT3G15980	Coatomer, beta' subunit;	cytosol		cytosol:21166475;golgi:25900983;golgi:25900983;golgi:25900983;nucleus:23396599;plasma membrane:21433285
AT3G16110	PDI-like 1-6;Encodes a protein disulfide isomerase-like (PDIL) protein, a member of a multigene family within the thioredoxin (TRX) superfamily. Unlike several other PDI family members, transcript levels for this gene are not up-regulated in response to three different chemical inducers of ER stress (dithiothreitol, beta-mercaptoethanol, and tunicamycin).	endoplasmic reticulum		endoplasmic reticulum:16618929;endoplasmic reticulum:22923678;golgi:25900983;plasma membrane:21433285
AT3G16520	UDP-glucosyl transferase 88A1;	cytosol		cytosol:21166475
AT3G16640	translationally controlled tumor protein;Encodes a protein homologous to translationally controlled tumor protein (TCTP) from Drosophila. In flies, TCTP functions guanine nucleotide exchange factor in the TOR signaling pathway. TCTP is expressed throughout the plant with highest levels seen in meristematic regions of the shoot and root. Loss of function alleles are not transmitted through the mal…	cytosol	cytosol:24040826	cytosol:21166475;extracellular:26572690;golgi:22430844;nucleus:14617066;nucleus:27177187;plasma membrane:25641898;plasma membrane:17644812;plasma membrane:22215637;plasma membrane:26781341;plastid:14729914;plastid:18431481;plastid:24361574;vacuole:17151019;vacuole:23903016
AT3G16760	Tetratricopeptide repeat (TPR)-like superfamily protein;	nucleus		extracellular:26572690;plasma membrane:17317660
AT3G16830	TOPLESS-related 2;	plasma membrane
AT3G16940	calmodulin binding;transcription regulators;	nucleus		nucleus:23396599
AT3G17390	S-adenosylmethionine synthetase family protein;S-adenosylmethionine synthetase	plasma membrane,nucleus		extracellular:26572690;golgi:25900983;golgi:25900983;golgi:25900983;golgi:25900983;golgi:25900983;mitochondrion:27122571;mitochondrion:27943495;nucleus:14505352;nucleus:15496452;nucleus:27177187;nucleus:23396599;plasma membrane:25641898;plasma membrane:15574830;plasma membrane:17317660;plasma membrane:17644812;plasma membrane:19334764;plasma membrane:22215637;plasma membrane:26781341;plastid:2436…
AT3G17770	Dihydroxyacetone kinase;	cytosol
AT3G17810	pyrimidine 1;Encodes a protein predicted to have dihydropyrimidine dehydrogenase activity. Its activity has not been demonstrated in vivo, but, it is required for efficient uracil catabolism in Arabidopsis. It localizes to the plastid.	plastid	plastid:19413687	extracellular:26572690;plastid:18431481;plastid:20423899;plastid:21531424;plastid:20061580;plastid:24361574;plastid:24872594
AT3G17840	receptor-like kinase 902;Encodes a receptor-like kinase found at the cell surface of various tissues. Its function remains unknown.	plasma membrane		extracellular:26572690;extracellular:28155257;plasma membrane:25641898;plasma membrane:14506206;plasma membrane:14517339;plasma membrane:15308754;plasma membrane:16618929;plasma membrane:17317660;plasma membrane:17644812;plasma membrane:20374526;plasma membrane:20843791;plasma membrane:21433285;plasma membrane:22215637;plasma membrane:22318864;plasma membrane:22923678;plasma membrane:26781341
AT3G17880	tetraticopeptide domain-containing thioredoxin;Encodes a thioredoxin-like disulfide reductase. The protein interacts with the yeast Hsp70 protein Ssb2 in vitro. This interaction is sensitive to the redox status of the thioredoxin domain of AtTDX.	nucleus
AT3G17900	;	golgi		golgi:25900983;golgi:25900983;golgi:21826108;plasma membrane:19334764
AT3G17940	Galactose mutarotase-like superfamily protein;	cytosol		cytosol:21166475
AT3G18000	S-adenosyl-L-methionine-dependent methyltransferases superfamily protein;Arabidopsis thaliana N-methyltransferase-like protein mRNA. Reduce transmission through pollen.	golgi		cytosol:21166475;golgi:25900983;golgi:25900983;golgi:25900983;golgi:25900983;golgi:25900983;vacuole:25900983
AT3G18165	modifier of snc1,4;Encodes MOS4 (Modifier of snc1, 4), a nuclear protein homologous to human Breast Cancer-Amplified Sequence (BCAS2). MOS4 interacts with AtCDC5 and PRL1. All three proteins are essential for plant innate immunity.	nucleus	unclear:15496452	cytoskeleton:24134884;nucleus:15496452;nucleus:27177187;nucleus:23396599
AT3G18190	TCP-1/cpn60 chaperonin family protein;	cytosol		cytosol:21166475;extracellular:26572690;golgi:25900983;golgi:25900983;golgi:25900983;golgi:25900983;golgi:25900983;mitochondrion:27122571;plasma membrane:25641898;plasma membrane:22318864;vacuole:25900983
AT3G18780	actin 2;Encodes an actin that is constitutively expressed in vegetative structures but not pollen. ACT2 is involved in tip growth of root hairs.	cytosol	vacuole:15722471	cytosol:28611809;golgi:25900983;golgi:25900983;golgi:25900983;golgi:25900983;golgi:25900983;mitochondrion:27943495;nucleus:14617066;nucleus:23396599;plasma membrane:15574830;plastid:21531424;plastid:24361574
AT3G18860	transducin family protein / WD-40 repeat family protein;	cytosol		cytosol:21166475
AT3G18940	clast3-related;	cytosol
AT3G19130	RNA-binding protein 47B;	nucleus		cytosol:21166475
AT3G19420	PTEN 2;	cytosol		cytosol:21166475;golgi:25900983;golgi:25900983;golgi:25900983;plasma membrane:21433285;vacuole:25900983
AT3G19760	eukaryotic initiation factor 4A-III;Encodes an RNA helicase that may be a component of the Exon Junction Complex. Subcellular localization is modulated by stress. Under normal conditions it is localized to the nuceloplasm but under hyopoxic conditions it localizes to the nucleolus and splicing speckles.	nucleus	cytosol:19435936;nucleus:19435936	golgi:25900983;golgi:25900983;golgi:25900983;golgi:25900983;golgi:25900983;nucleus:14617066;nucleus:15496452;nucleus:27177187;nucleus:23396599;vacuole:25900983
AT3G20050	T-complex protein 1 alpha subunit;Encodes a putative cytoplasmic chaperonin that is similar to mouse Tcp-1 (t complex polypeptide 1).	cytosol		cytosol:21166475;extracellular:26572690;golgi:25900983;golgi:25900983;golgi:25900983;golgi:25900983;golgi:25900983;mitochondrion:27122571;nucleus:23396599;plasma membrane:25641898;plasma membrane:19334764;plasma membrane:26781341;vacuole:23903016;vacuole:25900983
AT3G20630	ubiquitin-specific protease 14;Encodes a ubiquitin-specific protease. Identical to TTN6. Loss of function mutations are embryo lethals, having development arrested at the preglobular/globular stage. Also involved in root responses to phosphate deficiency.	cytosol		cytosol:21166475
AT3G21110	purin 7;5'-phosphoribosyl-4-(N-succinocarboxamide)-5-aminoimidazole synthetase (PUR7, syn. SAICAR synthetase), catalyzes aspartate addition at the alpha-amino group to the growing purine backbone.	plastid		plastid:21531424;plastid:18431481;plastid:20061580;plastid:24361574
AT3G22845	emp24/gp25L/p24 family/GOLD family protein;	endoplasmic reticulum	endoplasmic reticulum:23918961;golgi:23918961	endoplasmic reticulum:22923678;golgi:22430844;golgi:25900983;golgi:25900983;golgi:25900983;golgi:25900983;golgi:25900983;mitochondrion:27943495;plasma membrane:19334764;vacuole:15539469;vacuole:23903016
AT3G22890	ATP sulfurylase 1;encodes ATP sulfurylase, the first enzyme in the sulfate assimilation pathway of Arabidopsis.	cytosol,plastid		golgi:25900983;mitochondrion:27943495;plasma membrane:17317660;plastid:16207701;plastid:20423899;plastid:21531424;plastid:23851315;plastid:18431481;plastid:18633119;plastid:20061580;plastid:24361574;plastid:24872594;vacuole:25900983
AT3G22980	Ribosomal protein S5/Elongation factor G/III/V family protein;	cytosol		cytosol:21166475;golgi:25900983;golgi:25900983;golgi:25900983
AT3G23660	Sec23/Sec24 protein transport family protein;	golgi,endoplasmic reticulum	golgi:16553898
AT3G24170	glutathione-disulfide reductase;Encodes a cytosolic glutathione reductase.	peroxisome		extracellular:26572690;mitochondrion:27122571;mitochondrion:27943495;peroxisome:17951448;peroxisome:18931141;peroxisome:19329564
AT3G24350	syntaxin of plants 32;member of Glycoside Hydrolase Family 17	golgi	golgi:15342965	golgi:25900983;golgi:25900983;plasma membrane:19334764
AT3G25150	Nuclear transport factor 2 (NTF2) family protein with RNA binding (RRM-RBD-RNP motifs) domain;	nucleus		cytoskeleton:24134884;extracellular:26572690;plasma membrane:19334764
AT3G25230	rotamase FKBP 1;Encodes a a high molecular weight member of the FK506 binding protein (FKBP) family. It has three FKBP12-like domains, tetratricopeptide repeats, and a putative calmodulin binding domain. Modulates thermotolerance by interacting with HSP90.1 and affecting the accumulation of HsfA2-regulated sHSPs.	cytosol		cytosol:21166475;extracellular:26572690;plasma membrane:21433285;vacuole:23903016
AT3G25545	;	cytosol		cytosol:21166475
AT3G25800	protein phosphatase 2A subunit A2;one of three genes encoding the protein phosphatase 2A regulatory subunit	cytosol		cytosol:21166475;golgi:25900983;golgi:25900983;golgi:25900983;golgi:25900983;plasma membrane:25641898;plasma membrane:17317660;plasma membrane:21433285;plasma membrane:22215637;plasma membrane:26781341;vacuole:25900983
AT3G26420	RNA-binding (RRM/RBD/RNP motifs) family protein with retrovirus zinc finger-like domain;Zinc finger-containing glycine-rich RNA-binding protein. Cold-inducible. Contributes to the enhancement of freezing tolerance.	nucleus	nucleus:19329564	cytoskeleton:24134884;cytosol:21166475;peroxisome:19329564;plasma membrane:19334764
AT3G27190	uridine kinase-like 2;One of the homologous genes predicted to encode proteins with UPRT domains (Uracil phosphoribosyltransferase). Five of these genes (At5g40870, At3g27190, At1g55810, At4g26510 and At3g27440) show a high level of identity, and are annotated as also containing a N-terminal uracil kinase (UK) domain. These genes are referred to as UKL1 (UK-like 1), UKL2, UKL3, UKL4 and UKL5, res…	plastid	plastid:21828290	cytosol:21166475;vacuole:23903016
AT3G27300	glucose-6-phosphate dehydrogenase 5;	cytosol		cytosol:21166475;plastid:18431481
AT3G27400	Pectin lyase-like superfamily protein;	extracellular
AT3G27530	golgin candidate 6;This gene is predicted to encode a protein that functions as a Golgi apparatus structural component known as a golgin in mammals and yeast. A fluorescently-tagged version of GC6 co-localizes with Golgi markers, and this localization appears to be replicated using the C-terminal (225 aa) portion of the protein.	golgi	golgi:18182439;golgi:18810574	cytosol:18433157;cytosol:21166475;golgi:25900983;golgi:25900983;golgi:25900983;golgi:25900983;golgi:25900983
AT3G27740	carbamoyl phosphate synthetase A;carbamoyl phosphate synthetase small subunit mRNA (carA),	plastid		mitochondrion:21841088;plastid:16207701;plastid:21531424;plastid:18431481;plastid:18633119;plastid:20061580;plastid:24361574
AT3G28930	AIG2-like (avirulence induced gene) family protein;avrRpt2-induced gene that exhibits RPS2- and avrRpt2-dependent induction early after infection with Pseudomonas syringae pv maculicola strain ES4326 carrying avrRpt2	cytosol		cytosol:21166475
AT3G28940	AIG2-like (avirulence induced gene) family protein;	cytosol		extracellular:26572690;plasma membrane:15574830;plasma membrane:17317660;plasma membrane:17644812;plastid:15028209
AT3G28950	AIG2-like (avirulence induced gene) family protein;	cytosol
AT3G29350	histidine-containing phosphotransmitter 2;Encodes AHP2, one of the six Arabidopsis thaliana histidine phosphotransfer proteins (AHPs). AHPs function in His-to-Asp phosphorelay signal transduction and as redundant positive regulators of cytokinin signaling. Members of the AHP gene family include: AT3G21510 (AHP1), AT3G29350 (AHP2), AT5G39340 (AHP3), AT3G16360 (AHP4), AT1G03430 (AHP5) and AT1G80100…	cytosol	cytosol:11676033	cytosol:21166475;extracellular:26572690
AT3G43300	HOPM interactor 7;AtMIN7 is an immunity associated Arabidopsis protein targeted by HopM1, a conserved Pseudomonas syringae virulence protein. AtMIN7 encodes one of the eight members of the Arabidopsis adenosine diphosphate (ADP) ribosylation factor (ARF) guanine nucleotide exchange factor (GEF) protein family. The AFR GEF proteins are key components of the vesicle trafficking system in eukaryotic…	golgi		cytosol:21166475;golgi:25900983;golgi:25900983;golgi:25900983;golgi:25900983;golgi:25900983;plasma membrane:19334764;plasma membrane:21433285;vacuole:25900983
AT3G44110	DNAJ homologue 3;homologous to the co-chaperon DNAJ protein from E coli	nucleus	nucleus:15496452;unclear:15496452	cytosol:21166475;golgi:25900983;golgi:25900983;golgi:25900983;golgi:25900983;golgi:25900983;nucleus:14505352;nucleus:15496452;nucleus:27177187;nucleus:23396599;plasma membrane:17317660;plasma membrane:17644812;plasma membrane:19334764;plasma membrane:20843791;plasma membrane:21433285;plasma membrane:22215637;plasma membrane:26781341;vacuole:25900983
AT3G44340	clone eighty-four;homologous to yeast and animal Sec24 proteins; expression in yeast cells enhances their survival under oxidative stress conditions.	golgi		cytosol:21166475;golgi:25900983;plasma membrane:21433285
AT3G44620	protein tyrosine phosphatases;protein tyrosine phosphatases;	plastid		plastid:20423899;plastid:18431481;plastid:18633119;plastid:24361574
AT3G44750	histone deacetylase 3;Encodes a histone deacetylase. Controls the development of adaxial/abaxial leaf polarity. Two lines with RNAi-directed against this gene show reduced Agrobacterium-mediated DNA transformation of the roots.	nucleus	nucleus:14992728;nucleus:15144374	cytoskeleton:24134884;extracellular:26572690;nucleus:14505352;nucleus:15496452
AT3G46000	actin depolymerizing factor 2;Encodes depolymerizing factor 2.	cytosol	cytosol:15610358;nucleus:15610358	plasma membrane:17317660;plasma membrane:22215637
AT3G46060	RAB GTPase homolog 8A;small GTP-binding protein (ara-3)	plasma membrane	cytosol:23297417;golgi:23297417;peroxisome:23297417	extracellular:26572690;golgi:25900983;golgi:25900983;golgi:25900983;golgi:25900983;golgi:25900983;mitochondrion:27943495;plasma membrane:25641898;plasma membrane:15060130;plasma membrane:17317660;plasma membrane:17644812;plasma membrane:19334764;plasma membrane:22215637;plasma membrane:26781341;plastid:20061580;vacuole:15539469;vacuole:17151019;vacuole:25900983
AT3G46460	ubiquitin-conjugating enzyme 13;	cytosol
AT3G47590	alpha/beta-Hydrolases superfamily protein;	plastid		plastid:20061580
AT3G48530	SNF1-related protein kinase regulatory subunit gamma 1;	cytosol		cytosol:20374526;extracellular:26572690;golgi:25900983;golgi:25900983;golgi:25900983;vacuole:25900983
AT3G48690	alpha/beta-Hydrolases superfamily protein;Encodes a protein with carboxylesterase whose activity was tested using both pNA and 2,4-D-methyl.	cytosol		cytosol:21166475
AT3G48750	cell division control 2;A-type cyclin-dependent kinase. Together with its specific inhibitor, the Kip-related protein, KRP2 they regulate the mitosis-to-endocycle transition during leaf development. Dominant negative mutations abolish cell division. Loss of function phenotype has reduced fertility with failure to transmit via pollen. Pollen development is arrested at the second mitotic division. …	cytosol	cytosol:16415207;cytosol:20018602;nucleus:16415207;nucleus:20018602	cytosol:18433157;golgi:25900983;nucleus:18433157;plasma membrane:17317660;plasma membrane:26781341
AT3G48860	;	plasma membrane	plasma membrane:24179130	cytoskeleton:24134884;plasma membrane:17317660;plasma membrane:22215637
AT3G48870	Clp ATPase;Encodes a nuclear encoded protein with similarity to Clpa regulatory subunit of CLP protease complex. The protein is localized to the chloroplast stroma. May function redundantly with TIC complex in chloroplast protein import.	plastid	plastid:in house	golgi:25900983;golgi:25900983;golgi:25900983;golgi:25900983;golgi:25900983;mitochondrion:14671022;plasma membrane:19334764;plasma membrane:21433285;plastid:12938931;plastid:15028209;plastid:16207701;plastid:20423899;plastid:21531424;plastid:22923678;plastid:20061580;plastid:23390424;plastid:24872594;plastid:18431481;plastid:20061580;plastid:24361574;plastid:24872594;plastid:23667806;vacuole:25900…
AT3G48990	AMP-dependent synthetase and ligase family protein;	peroxisome	cytosol:22920973;peroxisome:22920973;plastid:22920973;plastid:22920973	extracellular:26572690;golgi:25900983;mitochondrion:27122571;plasma membrane:19334764;plasma membrane:26781341;plastid:18431481;plastid:20061580;plastid:24361574
AT3G49720	;	golgi		golgi:16618929;golgi:22430844;golgi:22923678;golgi:25900983;golgi:25122472;golgi:25900983;golgi:25900983;golgi:25900983;golgi:25900983;plasma membrane:17644812;plasma membrane:19334764;plastid:15322131;vacuole:17151019;vacuole:25900983
AT3G49870	ADP-ribosylation factor-like A1C;A member of ARF-like GTPase family. A thaliana has 21 members, in two subfamilies, ARF and ARF-like (ARL) GTPases.	cytosol	cytosol:15610358;nucleus:15610358	cytosol:21166475;extracellular:26572690;golgi:22430844;golgi:25900983;plasma membrane:15060130;plasma membrane:17317660;plasma membrane:17644812;plasma membrane:19334764;plasma membrane:20843791;plasma membrane:22215637;plasma membrane:26781341;vacuole:17151019;vacuole:23903016
AT3G50000	casein kinase II, alpha chain 2;casein kinase II catalytic subunit alpha	plasma membrane		cytosol:21166475;golgi:25900983;nucleus:23396599;plasma membrane:17317660;plasma membrane:22215637;plasma membrane:26781341;vacuole:25900983
AT3G50210	2-oxoglutarate (2OG) and Fe(II)-dependent oxygenase superfamily protein;	cytosol
AT3G50520	Phosphoglycerate mutase family protein;	cytosol
AT3G50590	Transducin/WD40 repeat-like superfamily protein;	plasma membrane,nucleus		cytoskeleton:24134884;golgi:25900983;golgi:25900983;golgi:25900983;golgi:25900983;golgi:25900983;nucleus:23396599;plasma membrane:17317660;plasma membrane:19334764;plasma membrane:21433285;plasma membrane:26781341
AT3G50670	U1 small nuclear ribonucleoprotein-70K;Encodes U1 snRNP 70K	nucleus	nucleus:15133128;nucleus:19098980
AT3G51310	VPS35 homolog C;Homolog of yeast retromer subunit VPS35. Part of a retromer-like protein complex involved in endosome to lysosome protein transport.	golgi		golgi:21826108;golgi:25900983
AT3G51670	SEC14 cytosolic factor family protein / phosphoglyceride transfer family protein;	plasma membrane		plasma membrane:25641898;plasma membrane:17317660;plasma membrane:17644812;plasma membrane:22318864;plasma membrane:26781341
AT3G51980	ARM repeat superfamily protein;	endoplasmic reticulum		endoplasmic reticulum:22923678;mitochondrion:27122571
AT3G52140	tetratricopeptide repeat (TPR)-containing protein;	cytosol	cytosol:25165398	cytoskeleton:24134884;cytosol:21166475;golgi:25900983;golgi:25900983;golgi:25900983;golgi:25900983;golgi:25900983;nucleus:23396599;plasma membrane:25641898;plasma membrane:17317660;plasma membrane:19334764;plasma membrane:21433285;plastid:15028209;vacuole:25900983
AT3G52150	RNA-binding (RRM/RBD/RNP motifs) family protein;	plastid		golgi:25900983;golgi:25900983;golgi:25900983;golgi:25900983;plastid:11826309;plastid:12938931;plastid:14729914;plastid:15028209;plastid:16207701;plastid:16648217;plastid:20423899;plastid:21531424;plastid:23851315;plastid:25740923;plastid:18431481;plastid:18633119;plastid:20061580;plastid:24361574;plastid:18431481
AT3G52380	chloroplast RNA-binding protein 33;chloroplast RNA-binding protein	plastid		plastid:16648217;plastid:21531424;plastid:18431481;plastid:18633119;plastid:20061580;plastid:24361574
AT3G52560	ubiquitin E2 variant 1D-4;MMZ4/UEV1D encodes a protein that may play a role in DNA damage responses and error-free post-replicative DNA repair by participating in lysine-63-based polyubiquitination reactions. UEV1D can form diubiquitin and triubiquitin chains in combination with UBC13A/UBC35 in vitro. It can also functionally complement an mms2 mutation in budding yeast, both by increasing mms2 m…	cytosol		cytosol:21166475
AT3G52630	Nucleic acid-binding, OB-fold-like protein;	extracellular		extracellular:26572690
AT3G52930	Aldolase superfamily protein;	cytosol		cytosol:21166475;extracellular:26572690;golgi:25900983;golgi:25900983;golgi:25900983;golgi:25900983;mitochondrion:27122571;mitochondrion:27943495;nucleus:15496452;plasma membrane:25641898;plasma membrane:17317660;plasma membrane:17644812;plasma membrane:19334764;plasma membrane:20843791;plasma membrane:21433285;plasma membrane:22215637;plasma membrane:26781341;plastid:15028209;plastid:20061580;pl…
AT3G53110	P-loop containing nucleoside triphosphate hydrolases superfamily protein;Encodes a putative DEAD-Box RNA Helicase and has RNA-dependent ATPase activity. Mutant is Sensitive to chilling stress and heat stress. Germination of the mutant is inhibited by ABA. LOS4 may be involved in temperature sensing. Is enriched in the nuclear envelope and also located in the cytoplasm. LOS4 is involved in export …	cytosol,nucleus		golgi:25900983;golgi:25900983;golgi:25900983;golgi:25900983;plasma membrane:17317660;plasma membrane:26781341;vacuole:25900983
AT3G53230	ATPase, AAA-type, CDC48 protein;	cytosol,nucleus	cytosol:23027663;nucleus:23027663;nucleus:23027663	cytosol:18433157;golgi:22430844;nucleus:15496452;plasma membrane:17317660;plasma membrane:19334764
AT3G53460	chloroplast RNA-binding protein 29;Encodes a nuclear gene with a consensus RNA-binding domain that is localized to the chloroplast.	plastid	plastid:16633814	golgi:25900983;golgi:25900983;golgi:25900983;golgi:25900983;golgi:25900983;nucleus:27177187;plasma membrane:22318864;plastid:11826309;plastid:14729914;plastid:16648217;plastid:20423899;plastid:21531424;plastid:23851315;plastid:18431481;plastid:18633119;plastid:20061580;plastid:24361574;plastid:20061580
AT3G53520	UDP-glucuronic acid decarboxylase 1;Encodes an isoform of UDP-glucuronic acid decarboxylase, which is predicted to be membrane-bound by PSORT analysis. This enzyme produces UDP-xylose, which is a substrate for many cell wall carbohydrates including hemicellulose and pectin. UDP-xylose is also known to feedback regulate several cell wall biosynthetic enzymes.	golgi		golgi:16618929;golgi:22430844;golgi:22923678;golgi:25900983;golgi:25122472;golgi:25900983;golgi:25900983;golgi:25900983;golgi:25900983;plasma membrane:19334764;plasma membrane:23990937;vacuole:25900983
AT3G53560	Tetratricopeptide repeat (TPR)-like superfamily protein;	plastid		plastid:15322131;plastid:18431481;plastid:22923678;plastid:20061580
AT3G53580	diaminopimelate epimerase family protein;	plastid		extracellular:26572690;plastid:21531424;plastid:18431481;plastid:20061580;plastid:24361574;plastid:24872594
AT3G53750	actin 3;Member of the Actin gene family. Expressed in mature pollen.	cytosol		extracellular:15694452;mitochondrion:27943495;nucleus:14617066
AT3G53880	NAD(P)-linked oxidoreductase superfamily protein;	cytosol		cytosol:21166475
AT3G54180	cyclin-dependent kinase B1;1;Arabidopsis homolog of yeast cdc2, a protein kinase (cyclin-dependent kinase) that plays a central role in control of the mitotic cell cycle.	cytosol	cytosol:20018602;nucleus:20018602
AT3G54360	zinc ion binding;	nucleus		golgi:25900983;vacuole:25900983
AT3G54540	general control non-repressible 4;member of GCN subfamily	nucleus		golgi:25900983;golgi:25900983;golgi:25900983;nucleus:27177187;nucleus:23396599
AT3G54900	CAX interacting protein 1;A.thaliana PICOT protein.It activates CAX1 gene Calcium transport activity.In other organisms, PICOT proteins appear to play a negative regulatory role in cellular stress responses.	plastid		plastid:18431481;plastid:20423899;plastid:20061580;plastid:24872594;plastid:20061580;plastid:24361574;plastid:24872594
AT3G55020	Ypt/Rab-GAP domain of gyp1p superfamily protein;	cytosol		cytosol:18433157;golgi:25900983
AT3G55430	O-Glycosyl hydrolases family 17 protein;	extracellular		extracellular:15593128;extracellular:16356755;extracellular:26572690;extracellular:28155257;plasma membrane:19334764;plasma membrane:21433285
AT3G55610	delta 1-pyrroline-5-carboxylate synthase 2;encodes delta 1-pyrroline-5-carboxylate synthetase B. Gene expression is induced by dehydration, high salt and ABA. Knock-out mutations in P5CS2 are embryo-lethal. P5CS2 appears to be present in different cells and/or different subcellular locations from P5CS1 in a tissue-dependent manner.	cytosol	cytosol:17971042;plastid:17971042	cytosol:21166475;golgi:25900983;golgi:25900983;golgi:25900983;mitochondrion:27122571;plasma membrane:25641898;plastid:20061580;vacuole:25900983
AT3G56150	eukaryotic translation initiation factor 3C;member of eIF3c - eukaryotic initiation factor 3c	cytosol,nucleus		cytosol:18433157;cytosol:21166475;extracellular:28003327;golgi:25900983;golgi:25900983;golgi:25900983;golgi:25900983;golgi:25900983;nucleus:18433157;nucleus:23396599;plasma membrane:19334764;plasma membrane:21433285;plasma membrane:22215637;plasma membrane:26781341;vacuole:25900983
AT3G56190	alpha-soluble NSF attachment protein 2;Encodes one of two alpha-SNAPs (soluble NSF attachment protein) in Arabidopsis	vacuole		cytosol:28611809;golgi:25900983;golgi:25900983;golgi:21826108;golgi:25900983;mitochondrion:27122571;plasma membrane:15574830;plasma membrane:17317660;plasma membrane:19334764;plasma membrane:22215637;plasma membrane:22318864;plasma membrane:22923678;plasma membrane:26781341;vacuole:15215502;vacuole:15539469;vacuole:17151019;vacuole:23903016;vacuole:25900983
AT3G56490	HIS triad family protein 3;Encodes a protein that has adenylylsulfate sulfohydrolase activity (E.C. 3.6.2.1) in vitro.	peroxisome	peroxisome:19329564;plastid:19329564	peroxisome:19329564;plasma membrane:25641898;plasma membrane:17644812
AT3G57090	Tetratricopeptide repeat (TPR)-like superfamily protein;Encodes a protein with similarity to yeast FIS proteins. These membrane anchored proteins bind DRP proteins and function during organelle division. FIS1B is expressed ubiquitously and appears to be involved in peroxisome division.	mitochondrion,peroxisome,plastid	mitochondrion:16545471;peroxisome:16545471;plastid:16545471	plasma membrane:25641898;plastid:18431481;plastid:24872594;plastid:20061580
AT3G57290	eukaryotic translation initiation factor 3E;Encodes a protein that is found in not only the eif3 complex but also in association with subunits of the COP9 signalosome. eIF3e appears to be subjected to proteasome-dependent degradation that requires the PCI domain of eIF3e. The level of eIF3e present in cells appears to affect the rate of translation.	cytosol		cytosol:21166475;golgi:25900983;golgi:25900983;golgi:25900983;golgi:25900983;golgi:25900983;nucleus:27177187;nucleus:23396599;plasma membrane:25641898;plasma membrane:17317660;plasma membrane:19334764;plasma membrane:22215637;plasma membrane:26781341;vacuole:23903016;vacuole:25900983
AT3G57410	villin 3;Encodes a protein with high homology to animal villin. VLN3 is a Ca2+-regulated villin involved in actin filament bundling.	cytosol	cytoskeleton:10631247	extracellular:26572690;golgi:25900983;golgi:25900983;golgi:25900983;golgi:25900983;golgi:25900983;plasma membrane:19334764;plasma membrane:21433285;plasma membrane:26781341;vacuole:25900983
AT3G57890	Tubulin binding cofactor C domain-containing protein;	golgi		cytosol:21166475;golgi:25900983;golgi:25900983;golgi:25900983;golgi:25900983;golgi:25900983;plasma membrane:21433285;vacuole:25900983
AT3G58180	ARM repeat superfamily protein;	cytosol		cytosol:21166475
AT3G58510	DEA(D/H)-box RNA helicase family protein;	nucleus		golgi:25900983;golgi:25900983;golgi:25900983;golgi:25900983;nucleus:15496452;peroxisome:17951448;plasma membrane:17317660;plasma membrane:19334764;plasma membrane:21433285
AT3G59020	ARM repeat superfamily protein;	cytosol,nucleus		cytosol:21166475;golgi:25900983;golgi:25900983;golgi:25900983;golgi:25900983;golgi:25900983;plasma membrane:19334764
AT3G59920	RAB GDP dissociation inhibitor 2;RAB GDP DISSOCIATION INHIBITOR 2	cytosol,extracellular	extracellular:21798375	cytosol:21166475;golgi:25900983;golgi:25900983;golgi:25900983;plasma membrane:22215637
AT3G59970	methylenetetrahydrofolate reductase 1;methylenetetrahydrofolate reductase MTHFR1 mRNA, complete	cytosol		golgi:25900983;golgi:25900983;golgi:25900983;golgi:25900983;plasma membrane:25641898;plasma membrane:22215637
AT3G59990	methionine aminopeptidase 2B;Encodes a MAP2 like methionine aminopeptidase	cytosol	cytosol:11060042	mitochondrion:27122571
AT3G60190	DYNAMIN-like 1E;At3g60190 encodes Arabidopsis dynamin-related protein 1E, DRP1E, also known as EDR3, ADL4 and ADL1E, which is 624 amino acid residues long, has a predicted mass of 69.8 kDa and a pI of 7.5. Dynamin-related protein 1E belongs to a plant-specific subclass of dynamin-related proteins (DRP1), consisting of five members in Arabidopsis (A, B, C, D, E). This class is characterized by hav…	cytosol	cytosol:14750520;mitochondrion:14523248;mitochondrion:16824181;plasma membrane:26095877	cytoskeleton:24134884;golgi:25900983;golgi:25900983;golgi:25900983;golgi:25900983;golgi:25900983;nucleus:23396599;plasma membrane:16618929;plasma membrane:17317660;plasma membrane:19334764;plasma membrane:21433285;plasma membrane:22215637;plasma membrane:22923678;plasma membrane:26781341;vacuole:15539469;vacuole:17151019;vacuole:23903016;vacuole:25900983
AT3G60450	Phosphoglycerate mutase family protein;	cytosol		cytosol:21166475
AT3G60600	vesicle associated protein;Encodes VAP27 (for Vesicle-Associated Protein). VAP27 has high homology to the VAP33 family of SNARE-like proteins from animals. May be involved in vesicular transport to or from the ER. Located exclusively in limiting membrane of protein storage vacuoles. Binds SRC2.	plasma membrane,endoplasmic reticulum	endoplasmic reticulum:27159525;plasma membrane:27159525	cytosol:18433157;endoplasmic reticulum:16618929;endoplasmic reticulum:22923678;extracellular:26572690;golgi:25900983;nucleus:18433157;plasma membrane:25641898;plasma membrane:17317660;plasma membrane:17644812;plasma membrane:19334764;plasma membrane:20374526;plasma membrane:22215637;plasma membrane:26781341
AT3G60660	;	nucleus
AT3G60740	ARM repeat superfamily protein;Encodes tubulin-folding cofactor D. Mutants arrest during embryogenesis with embryos that are small, mushroom-shaped ('pilz') and consist of only one or few large cells each containing one or more variably enlarged nuclei and often cell wall stubs. Gene product necessary for continuous microtubule organization.	golgi		cytosol:21166475;golgi:25900983;golgi:25900983;golgi:25900983
AT3G60830	actin-related protein 7;Encodes an actin-related protein required for normal embryogenesis, plant architecture and floral organ abscission.	cytosol		cytoskeleton:24134884;nucleus:27177187;nucleus:23396599
AT3G60860	SEC7-like guanine nucleotide exchange family protein;	golgi		cytosol:21166475;golgi:25900983;golgi:25900983;golgi:25900983;golgi:25900983;vacuole:25900983
AT3G61140	26S proteasome, regulatory subunit Rpn7;Proteasome component (PCI) domain;Represses photomorphogenesis and induces skotomorphogenesis in the dark. Component of the nuclear-localized COP9 complex. Mutants display striking purple coloration due to anthocyanin accumulation in their cotyledons, first become defective during embryogenesis and exhibit limited seedling development.	cytosol,nucleus		cytosol:21166475
AT3G61220	NAD(P)-binding Rossmann-fold superfamily protein;	cytosol	cytosol:21169366	cytosol:21166475;plasma membrane:17644812
AT3G61240	DEA(D/H)-box RNA helicase family protein;	nucleus
AT3G61650	gamma-tubulin;Required for centrosomal and noncentrosomal microtubule nucleation. Involved in specification of cell identity, such as stomatal patterning. Constitutively expressed throughout plant.	cytosol	cytoskeleton:12602947	cytoskeleton:24134884;golgi:25900983;golgi:25900983;mitochondrion:14671022;plasma membrane:17317660
AT3G61760	DYNAMIN-like 1B;	cytosol		cytoskeleton:24134884;golgi:25900983;plastid:24872594
AT3G61860	RNA-binding (RRM/RBD/RNP motifs) family protein;encodes an arginine/serine-rich splicing factor. transcript is alternatively spliced and is differentially expressed in different tissues (flowers, roots, stems, and leaves) examined.	nucleus	nucleus:14740228;nucleus:15133128;nucleus:15686520	nucleus:24012629
AT3G62010	;	golgi		cytosol:21166475;golgi:25900983;golgi:25900983;golgi:25900983;golgi:25900983;golgi:25900983
AT3G62030	rotamase CYP 4;nuclear-encoded chloroplast stromal cyclophilin CYP20-3 (also known as ROC4). Protein is tyrosine-phosphorylated and its phosphorylation state is modulated in response to ABA in Arabidopsis thaliana seeds.	plastid		cytosol:25587034;mitochondrion:27943495;plasma membrane:25641898;plastid:11719511;plastid:12938931;plastid:15028209;plastid:15322131;plastid:16207701;plastid:16648217;plastid:20423899;plastid:21531424;plastid:23851315;plastid:20061580;plastid:18431481;plastid:18633119;plastid:20061580;plastid:21539947;plastid:24361574
AT3G62290	ADP-ribosylation factor A1E;A member of ARF GTPase family. A thaliana has 21 members of this family, known to be essential for vesicle coating and uncoating and functions in GTP-binding. The gene is shown to play a role in cell division, cell expansion and cellulose production using antisense construct.	vacuole		golgi:22430844;mitochondrion:27943495;plasma membrane:22215637;plastid:24361574;vacuole:15539469
AT3G62310	RNA helicase family protein;	nucleus		cytosol:21166475;nucleus:15496452
AT3G62360	Carbohydrate-binding-like fold;	endoplasmic reticulum		endoplasmic reticulum:16618929;endoplasmic reticulum:22923678;extracellular:16287169;golgi:22430844;golgi:25900983;golgi:25900983;golgi:25900983;golgi:25900983;golgi:25900983;plasma membrane:25641898;plasma membrane:15574830;plasma membrane:19334764;plasma membrane:21433285;plasma membrane:22215637;plasma membrane:26748395;plasma membrane:26781341;vacuole:17151019;vacuole:25900983
AT3G62370	heme binding;	vacuole		golgi:22430844;golgi:22923678;golgi:25122472;vacuole:25900983
AT3G62600	DNAJ heat shock family protein;J domain protein localized in ER lumen. Can partially compensate for the growth defect in jem1 scj1 mutant yeast. Forms a complex SDF2-ERdj3B-BiP that is required for the proper accumulation of the surface-exposed leucine-rich repeat receptor kinases EFR. EFR is involved in PAMP (pathogen associated molecular patterns) triggered immunity.	endoplasmic reticulum		endoplasmic reticulum:22923678;nucleus:23396599;plasma membrane:17317660;plasma membrane:20843791;plasma membrane:22215637
AT3G62830	NAD(P)-binding Rossmann-fold superfamily protein;encodes an isoform of UDP-glucuronic acid decarboxylase, which is predicted to be membrane-bound by PSORT. This enzyme produces UDP-xylose, which is a substrate for many cell wall carbohydrates including hemicellulose and pectin. UDP-xylose is also known to feedback regulate several cell wall biosynthetic enzymes.	golgi		golgi:22430844;golgi:22923678;golgi:25122472;golgi:25900983;golgi:25900983;golgi:25900983;golgi:25900983;plasma membrane:17644812
AT3G62940	Cysteine proteinases superfamily protein;	nucleus		cytoskeleton:24134884;cytosol:21166475
AT3G63000	NPL4-like protein 1;	cytosol		cytosol:21166475
AT3G63130	RAN GTPase activating protein 1;Encodes a RAN GTPase activating protein involved in nuclear import, cell plate formation and mitotic spindle formation.	cytosol,nucleus	nucleus:12061901	cytoskeleton:24134884;golgi:25900983;nucleus:23396599;plasma membrane:17317660;plasma membrane:21433285;plastid:15028209
AT3G63140	chloroplast stem-loop binding protein of 41 kDa;Encodes a protein with ribonuclease activity that is involved in plastid rRNA maturation.	plastid		mitochondrion:27122571;nucleus:23396599;plasma membrane:25641898;plastid:12938931;plastid:15028209;plastid:16207701;plastid:16648217;plastid:19288221;plastid:20423899;plastid:21531424;plastid:22274653;plastid:23851315;plastid:25740923;plastid:24872594;plastid:18431481;plastid:18433418;plastid:18633119;plastid:20061580;plastid:21539947;plastid:24361574;plastid:24872594;plastid:16461379;plastid:200…
AT3G63460	transducin family protein / WD-40 repeat family protein;	golgi		cytosol:21166475;golgi:25900983;golgi:25900983;golgi:25900983;golgi:25900983;golgi:25900983;plasma membrane:25641898;plasma membrane:19334764;plasma membrane:21433285;plasma membrane:22215637;plasma membrane:26781341;vacuole:25900983
AT3G63490	Ribosomal protein L1p/L10e family;	plastid		golgi:25900983;golgi:25900983;golgi:25900983;golgi:25900983;golgi:25900983;mitochondrion:27122571;nucleus:14617066;nucleus:23396599;plasma membrane:19334764;plastid:15028209;plastid:15322131;plastid:16207701;plastid:20423899;plastid:21531424;plastid:23549413;plastid:23851315;plastid:26987276;plastid:20061580;plastid:24872594;plastid:18431481;plastid:18633119;plastid:20061580;plastid:24361574;plas…
AT3G66654	Cyclophilin-like peptidyl-prolyl cis-trans isomerase family protein;	golgi		golgi:16618929;golgi:22430844;golgi:22923678;golgi:25900983;golgi:25122472;golgi:25900983;golgi:25900983;golgi:25900983;golgi:25900983;plasma membrane:17317660;vacuole:25900983
AT4G00830	RNA-binding (RRM/RBD/RNP motifs) family protein;	nucleus		cytosol:21166475
AT4G01370	MAP kinase 4;Encodes a nuclear and cytoplasmically localized MAP kinase involved in mediating responses to pathogens. Its substrates include MKS1 and probably MAP65-1.The MAP65-1 interaction is involved in mediating cortical microtuble organization.	cytosol,nucleus	cytosol:21098735;cytosol:21098735;nucleus:21098735;unclear:15610358	cytosol:21166475
AT4G01400	;	golgi		golgi:25900983;golgi:25900983;golgi:25900983;golgi:25900983;golgi:25900983;plasma membrane:19334764;vacuole:25900983
AT4G01690	Flavin containing amine oxidoreductase family;Encodes protoporphyrinogen oxidase (PPOX).	plastid		golgi:25900983;golgi:25900983;golgi:25900983;golgi:25900983;mitochondrion:27122571;mitochondrion:27943495;plasma membrane:19334764;plastid:12938931;plastid:15028209;plastid:18431481;plastid:21531424;plastid:20061580;plastid:24872594;plastid:20061580;plastid:23667806;plastid:24872594;vacuole:25900983
AT4G01850	S-adenosylmethionine synthetase 2;	cytosol,nucleus	nucleus:15496452	golgi:25900983;golgi:25900983;golgi:25900983;golgi:25900983;golgi:25900983;nucleus:14505352;nucleus:15496452;plasma membrane:19334764;plastid:24361574;vacuole:25900983
AT4G02080	secretion-associated RAS super family 2;A member of ARF-like GTPase family. A thaliana has 21 members, in two subfamilies, ARF and ARF-like (ARL) GTPases.	plasma membrane		plasma membrane:15060130;plasma membrane:17644812;plasma membrane:19334764;plasma membrane:26781341
AT4G02150	ARM repeat superfamily protein;Encodes IMPORTIN ALPHA 3. Mutant plants act as suppressors of snc1 response and salicylic acid accumulation. Located in the nucleus. Involved in protein import. Protein interacts with Agrobacterium proteins VirD2 and VirE2. Is not individually essential for Agrobacterium-mediated root transformation, but when overexpressed can rescue the impa-4 decreased transformat…	nucleus	cytosol:22623495	cytosol:21166475
AT4G02570	cullin 1;Encodes a cullin that is a component of SCF ubiquitin ligase complexes involved in mediating responses to auxin and jasmonic acid. Homozygous auxin-resistant mutants arrest growth soon after germination, lacking a root and hypocotyl. Heterozygotes display a variety of phenotypes consistent with impaired auxin response.	nucleus	cytosol:23319550;nucleus:23319550	cytosol:21166475;golgi:25900983;golgi:25900983;golgi:25900983;plasma membrane:21433285
AT4G02840	Small nuclear ribonucleoprotein family protein;	nucleus		cytoskeleton:24134884;extracellular:26572690;nucleus:15496452;nucleus:23396599;plasma membrane:19334764;vacuole:17151019
AT4G04910	AAA-type ATPase family protein;N-ethylmaleimide sensitive factor	golgi		cytosol:28611809;golgi:22430844;golgi:25900983;golgi:25900983;golgi:25900983;golgi:25900983;golgi:25900983;plasma membrane:25641898;plasma membrane:19334764;plasma membrane:21433285;plasma membrane:22318864;plasma membrane:26781341;plastid:23667806;vacuole:15539469;vacuole:25900983
AT4G04950	thioredoxin family protein;	cytosol	cytosol:22762155;nucleus:22762155	cytosol:21166475
AT4G08520	SNARE-like superfamily protein;	cytosol		extracellular:26572690;plasma membrane:17644812
AT4G08950	Phosphate-responsive 1 family protein;	extracellular		extracellular:14595688;extracellular:16287169;extracellular:16356755;extracellular:16729891;extracellular:26572690;extracellular:28155257;golgi:22430844
AT4G10050	esterase/lipase/thioesterase family protein;	cytosol		vacuole:14760709
AT4G10320	tRNA synthetase class I (I, L, M and V) family protein;	cytosol		cytosol:21166475;cytosol:22522809;golgi:25900983;golgi:25900983;golgi:25900983;nucleus:23396599;plasma membrane:25641898;plasma membrane:21433285;vacuole:23903016
AT4G11260	phosphatase-related;Functions in plant disease resistance signaling, SCF(TIR1) mediated degradation of Aux/IAA proteins and HSP90 mediated degradation of R resistance proteins. AtSGT1a and AtSGT1b are functionally redundant in the resistance to pathogenes. AtSGT1b was more highly expressed than AtSGT1. The N-terminal TPR domain of AtSGT1a reduces the steady-state level of Arabidopsis SGT1 protein…	cytosol		cytosol:21166475;extracellular:26572690;golgi:25900983;golgi:25900983;golgi:25900983;golgi:25900983;plasma membrane:26781341;vacuole:25900983
AT4G11330	MAP kinase 5;MAP kinase	cytosol
AT4G11380	Adaptin family protein;	plasma membrane		golgi:25900983;golgi:25900983;golgi:25900983;golgi:25900983;golgi:25900983;nucleus:23396599;plasma membrane:17317660;plasma membrane:20374526;plasma membrane:21433285;plasma membrane:22215637;plasma membrane:26781341
AT4G11420	eukaryotic translation initiation factor 3A;Encodes a subunit of eukaryotic initiation factor 3 (eIF3), a multisubunit complex that is required for binding of mRNA to 40 S ribosomal subunits, stabilization of ternary complex binding to 40 S subunits, and dissociation of 40 and 60 S subunits.	cytosol,nucleus		cytosol:21166475;golgi:25900983;golgi:25900983;golgi:25900983;golgi:25900983;golgi:25900983;nucleus:27177187;nucleus:23396599;plasma membrane:25641898;plasma membrane:17317660;plasma membrane:19334764;plasma membrane:21433285;plasma membrane:26781341;vacuole:25900983
AT4G11600	glutathione peroxidase 6;Encodes glutathione peroxidase.	mitochondrion	cytosol:28102911;mitochondrion:28102911	cytosol:21166475;extracellular:26572690;mitochondrion:15276431;mitochondrion:23444301;mitochondrion:27943495;mitochondrion:23444301;plasma membrane:25641898;plasma membrane:15060130;plasma membrane:17644812;plasma membrane:26781341
AT4G11820	hydroxymethylglutaryl-CoA synthase / HMG-CoA synthase / 3-hydroxy-3-methylglutaryl coenzyme A synthase;Encodes a protein with hydroxymethylglutaryl-CoA synthase activity which was characterized by phenotypical complementation of the S. cerevisiae mutant.	cytosol		cytosol:21166475;extracellular:26572690
AT4G12390	pectin methylesterase inhibitor 1;	extracellular		extracellular:26572690;plasma membrane:19334764
AT4G12650	Endomembrane protein 70 protein family;	golgi		extracellular:26572690;golgi:16618929;golgi:22430844;golgi:22923678;golgi:25900983;golgi:25122472;golgi:25900983;golgi:25900983;golgi:25900983;golgi:21826108;golgi:25900983;plasma membrane:25641898;plasma membrane:19334764;vacuole:14760709;vacuole:17151019;vacuole:25900983
AT4G13010	Oxidoreductase, zinc-binding dehydrogenase family protein;	cytosol	plastid:12368288	cytoskeleton:24134884;golgi:25900983;golgi:25900983;golgi:25900983;golgi:25900983;mitochondrion:27943495;plasma membrane:25641898;plasma membrane:15574830;plasma membrane:17644812;plasma membrane:22215637;plasma membrane:22318864;plasma membrane:22923678;plasma membrane:26781341;plastid:15322131;plastid:21531424;plastid:23549413;plastid:18431481;plastid:20061580;plastid:24872594;vacuole:25900983
AT4G13780	methionine--tRNA ligase, putative / methionyl-tRNA synthetase, putative / MetRS, putative;	cytosol		cytosol:21166475;mitochondrion:27943495
AT4G14110	COP9 signalosome, subunit CSN8;Represses photomorphogenesis and induces skotomorphogenesis in the dark. A component of the COP9 signalosome complex.	cytosol
AT4G14160	Sec23/Sec24 protein transport family protein;	golgi,endoplasmic reticulum		cytosol:21166475;golgi:25900983;golgi:25900983;golgi:25900983;golgi:25900983;mitochondrion:27122571;plasma membrane:19334764;plasma membrane:21433285
AT4G14710	RmlC-like cupins superfamily protein;	cytosol		cytosol:21166475
AT4G15410	serine/threonine protein phosphatase 2A 55 kDa regulatory subunit B prime gamma;	nucleus
AT4G15900	pleiotropic regulatory locus 1;Mutations confer hypersensitivity to glucose and sucrose and augments sensitivity to cytokinin, ethylene, ABA and auxin. Encodes a nuclear WD40 protein that is imported into the nucleus. Essential for plant innate immunity. Interacts with MOS4 and AtCDC5. It is also predicted to have two DWD motifs. It can bind to DDB1a in Y2H assays, and DDB1b in co-IP assays, and …	nucleus		cytoskeleton:24134884;nucleus:27177187;nucleus:23396599
AT4G15930	Dynein light chain type 1 family protein;	cytosol		extracellular:26572690;plasma membrane:26781341
AT4G16143	importin alpha isoform 2;Protein interacts with Agrobacterium proteins VirD2 and VirE2. Is not individually essential for Agrobacterium-mediated root transformation, but when overexpressed can rescue the impa-4 decreased transformation susceptibility phenotype.	nucleus	cytosol:22623495	cytosol:18433157;cytosol:21166475;extracellular:26572690;golgi:25900983;golgi:25900983;golgi:25900983;golgi:25900983;golgi:25900983;nucleus:15496452;nucleus:23396599;plasma membrane:22215637;plasma membrane:26781341;vacuole:25900983
AT4G17100	;	cytosol
AT4G17190	farnesyl diphosphate synthase 2;Encodes a protein with farnesyl diphosphate synthase activity, which catalyzes the rate limiting step in isoprenoid biosynthesis. Its mRNA is most abundantly expressed in flowers.	cytosol		cytosol:21166475
AT4G17510	ubiquitin C-terminal hydrolase 3;	cytosol		cytosol:21166475;plasma membrane:19334764;vacuole:25900983
AT4G17720	RNA-binding (RRM/RBD/RNP motifs) family protein;	cytosol	cytosol:26980300;nucleus:26980300	cytosol:21166475;golgi:25900983;golgi:25900983;plasma membrane:19334764
AT4G17890	ARF-GAP domain 8;A member of ARF GAP domain (AGD), A thaliana has 15 members, grouped into four classes.	golgi	golgi:23266962	cytosol:21166475
AT4G18480	P-loop containing nucleoside triphosphate hydrolases superfamily protein;Encodes the CHLI subunit of magnesium chelatase which is required for chlorophyll biosynthesis. All four cysteine residues of the protein form two disulfide bonds (Cys102-Cys193 and Cys354-Cys396) under oxidized conditions but are fully reduced by reduction. It was suggested that the redox state of CHLI is regulated in vivo …	plastid		golgi:25900983;golgi:25900983;golgi:25900983;golgi:25900983;golgi:25900983;nucleus:27177187;plastid:16207701;plastid:20423899;plastid:21531424;plastid:23851315;plastid:26987276;plastid:18431481;plastid:18633119;plastid:20061580;plastid:21539947;plastid:24361574;plastid:24872594;vacuole:25900983
AT4G18810	NAD(P)-binding Rossmann-fold superfamily protein;	plastid		plastid:20423899;plastid:21531424;plastid:23549413;plastid:24872594;plastid:18431481;plastid:20061580;plastid:24361574;plastid:24872594;vacuole:14760709
AT4G18930	RNA ligase/cyclic nucleotide phosphodiesterase family protein;	cytosol
AT4G18950	Integrin-linked protein kinase family;	cytosol	cytosol:15610358;nucleus:15610358	cytosol:21166475
AT4G19003	E2F/DP family winged-helix DNA-binding domain;	cytosol,nucleus		extracellular:26572690;plasma membrane:22215637;plasma membrane:26781341
AT4G19006	Proteasome component (PCI) domain protein;	cytosol,nucleus		cytosol:14623897;cytosol:21166475;plasma membrane:25641898
AT4G19210	RNAse l inhibitor protein 2;member of RLI subfamily	cytosol		cytosol:28611809;golgi:25900983;golgi:25900983;golgi:25900983;golgi:25900983;golgi:25900983;plasma membrane:19334764;plasma membrane:21433285;vacuole:25900983
AT4G20360	RAB GTPase homolog E1B;	plastid	plastid:in house;unclear:24130194	cytosol:25587034;golgi:25900983;golgi:25900983;golgi:25900983;golgi:25900983;golgi:25900983;nucleus:14505352;nucleus:14617066;nucleus:15496452;nucleus:27177187;nucleus:23396599;plasma membrane:25641898;plasma membrane:19334764;plasma membrane:22215637;plasma membrane:26781341;plastid:12766230;plastid:12938931;plastid:15028209;plastid:15322131;plastid:16207701;plastid:20423899;plastid:21531424;pla…
AT4G20410	gamma-soluble NSF attachment protein;Encodes a member of the gamma-soluble NSF attachment protein (gSNAP) gene family.	plasma membrane		golgi:25900983;plasma membrane:17317660;plasma membrane:19334764;plasma membrane:22215637;vacuole:23903016;vacuole:25900983
AT4G21150	ribophorin II (RPN2) family protein;	endoplasmic reticulum	endoplasmic reticulum:23782494	endoplasmic reticulum:16618929;endoplasmic reticulum:22923678;extracellular:16287169;golgi:22430844;golgi:25900983;golgi:25900983;golgi:25900983;golgi:25900983;golgi:25900983;mitochondrion:15276431;nucleus:23396599;plasma membrane:25641898;plasma membrane:17317660;plasma membrane:19334764;plasma membrane:21433285;plasma membrane:22215637;plasma membrane:23323832;plasma membrane:26781341;vacuole:1…
AT4G22530	S-adenosyl-L-methionine-dependent methyltransferases superfamily protein;	cytosol	cytosol:21443605;nucleus:21443605	cytosol:21166475
AT4G22570	adenine phosphoribosyl transferase 3;Encodes an adenine phosphoribosyltransferase (APT; EC 2.4.2.7), which is a constitutively expressed enzyme involved in the one-step salvage of adenine to AMP. APT3 has higher affinity for zeatin, isopentenyladenine and benzyladenine than APT1 but lower Vmax than APT1.	cytosol		extracellular:26572690;plastid:20061580
AT4G22670	HSP70-interacting protein 1;	cytosol		cytosol:20374526;cytosol:21166475;plasma membrane:21433285;plasma membrane:22215637;plasma membrane:26781341;vacuole:18686298
AT4G22710	cytochrome P450, family 706, subfamily A, polypeptide 2;member of CYP706A	endoplasmic reticulum		golgi:22430844;golgi:25900983;plasma membrane:25641898;plasma membrane:17644812;plasma membrane:21433285;plasma membrane:23990937;plastid:23390424;vacuole:25900983
AT4G23100	glutamate-cysteine ligase;Encodes the enzyme glutamate-cysteine ligase catalyzing the first, and rate-limiting, step of glutathione biosynthesis. Required for cell proliferation at the root tip. Involved in susceptibility to the bacterial pathogen Pseudomonas syringae. Mutants are phytoalexin defective.	plastid		mitochondrion:27122571;plastid:15028209;plastid:16207701;plastid:20423899;plastid:21531424;plastid:22923678;plastid:23851315;plastid:18431481;plastid:18633119;plastid:20061580;plastid:21539947;plastid:24361574;plastid:24872594
AT4G23630	VIRB2-interacting protein 1;	plasma membrane	cytosol:15494553;cytosol:26084919;endoplasmic reticulum:26084919	endoplasmic reticulum:22923678;plasma membrane:25641898;plasma membrane:15060130;plasma membrane:17317660;plasma membrane:19334764;plasma membrane:22215637;plasma membrane:22318864;plasma membrane:26781341
AT4G23650	calcium-dependent protein kinase 6;Encodes calcium dependent protein kinase 3 (CPK3), a member of the Arabidopsis CDPK gene family. CDPKs contain an intrinsic Ca2+-activation domain with four EF hand Ca2+-binding sites. CDPKs protein kinases have been proposed to function in multiple plant signal transduction pathways downstream of [Ca2+]cyt elevations, thus transducing various physiological resp…	cytosol	cytosol:12913141;nucleus:12913141	cytosol:21166475;golgi:25900983;golgi:25900983;golgi:25900983;golgi:25900983;golgi:25900983;plasma membrane:25641898;plasma membrane:15574830;plasma membrane:16618929;plasma membrane:16635983;plasma membrane:17317660;plasma membrane:19334764;plasma membrane:20843791;plasma membrane:22215637;plasma membrane:22318864;plasma membrane:22923678;plasma membrane:26781341;vacuole:25900983
AT4G23850	AMP-dependent synthetase and ligase family protein;	plasma membrane		extracellular:26572690;golgi:22430844;golgi:25900983;golgi:25900983;golgi:25900983;golgi:25900983;golgi:25900983;plasma membrane:25641898;plasma membrane:17317660;plasma membrane:19334764;plasma membrane:21433285;plasma membrane:22215637;plasma membrane:22318864;plasma membrane:26781341;vacuole:25900983
AT4G24190	Chaperone protein htpG family protein;encodes an ortholog of GRP94, an ER-resident HSP90-like protein and is involved in regulation of meristem size and organization. Single and double mutant analyses suggest that SHD may be required for the correct folding and/or complex formation of CLV proteins. Lines carrying recessive mutations in this locus exhibits expanded shoot meristems, disorganized ro…	endoplasmic reticulum	endoplasmic reticulum:18931141	endoplasmic reticulum:16618929;endoplasmic reticulum:22923678;extracellular:26572690;golgi:25900983;golgi:25900983;golgi:25900983;golgi:25900983;golgi:25900983;mitochondrion:14671022;mitochondrion:24727099;mitochondrion:27943495;nucleus:14617066;nucleus:27177187;nucleus:23396599;plasma membrane:25641898;plasma membrane:17644812;plasma membrane:19334764;plasma membrane:21433285;plasma membrane:222…
AT4G24280	chloroplast heat shock protein 70-1;Involved in protein import into chloroplasts during early developmental stages.	plastid		extracellular:26572690;golgi:25900983;golgi:25900983;golgi:25900983;golgi:25900983;golgi:25900983;mitochondrion:17137349;mitochondrion:18385124;mitochondrion:27943495;nucleus:14617066;nucleus:23396599;plasma membrane:17869214;plasma membrane:21433285;plastid:11826309;plastid:12938931;plastid:14729914;plastid:15028209;plastid:16207701;plastid:16648217;plastid:20423899;plastid:21531424;plastid:2385…
AT4G24550	Clathrin adaptor complexes medium subunit family protein;	golgi		cytosol:21166475;golgi:25900983;golgi:25900983;golgi:25900983;golgi:25900983;golgi:25900983;vacuole:25900983
AT4G24620	phosphoglucose isomerase 1;The PGI1 gene encodes the plastid phospho-glucose (Glc) isomerase. While pgi1-1 mutant has a deficiency in leaf starch synthesis, it accumulates starch in root cap cells. Flowering time of the pgi1-1 mutant is significantly delayed under short-day conditions.	plastid		extracellular:26572690;mitochondrion:27943495;plastid:12938931;plastid:15028209;plastid:16207701;plastid:20423899;plastid:21531424;plastid:23851315;plastid:18431481;plastid:20061580;plastid:24361574;plastid:24872594
AT4G24770	31-kDa RNA binding protein;Encodes a chloroplast RNA-binding protein. A substrate of the type III effector HopU1 (mono-ADP-ribosyltransferase). Required for editing and stability of specific chloroplast mRNAs.	plastid	nucleus:14703514	mitochondrion:27122571;nucleus:27177187;plastid:11826309;plastid:12938931;plastid:14729914;plastid:15028209;plastid:15322131;plastid:16207701;plastid:19288221;plastid:20423899;plastid:21531424;plastid:25740923;plastid:26987276;plastid:20061580;plastid:24872594;plastid:18431481;plastid:18433418;plastid:18633119;plastid:20061580;plastid:24361574;plastid:24872594
AT4G24800	MA3 domain-containing protein;	golgi		cytosol:21166475;golgi:22430844;golgi:25900983;golgi:25900983;golgi:25900983;golgi:25900983;golgi:25900983;mitochondrion:21841088;plasma membrane:19334764
AT4G24820	26S proteasome, regulatory subunit Rpn7;Proteasome component (PCI) domain;	cytosol,nucleus		cytosol:14623893;cytosol:21166475;golgi:25900983;golgi:25900983;golgi:25900983;golgi:25900983;nucleus:23396599;plasma membrane:25641898;plasma membrane:17317660;plasma membrane:19334764;plasma membrane:26781341;vacuole:23903016;vacuole:25900983
AT4G24840	;	golgi		golgi:25900983;golgi:25900983;golgi:25900983;golgi:25900983;golgi:25900983;plastid:24872594;vacuole:15539469
AT4G25340	FK506 BINDING PROTEIN 53;Encodes a member of the FKBP-type immunophilin family that functions as a histone chaparone. Binds to 18S rDNA and represses its expression.	nucleus		cytoskeleton:24134884;cytosol:21166475;nucleus:15496452;nucleus:23396599
AT4G26110	nucleosome assembly protein1;1;Encodes a member of a small gene family of proteins with similarity to nucleosome assembly proteins.May function in nucleotide excision repair. Loss of function mutations have no obvious visible phenotypes but do seem to affect transcription of NER related genes.	nucleus		cytosol:21166475;extracellular:26572690;golgi:25900983;golgi:25900983;golgi:25900983;nucleus:23396599;plasma membrane:17317660;plasma membrane:19334764;plasma membrane:22215637;plasma membrane:26781341
AT4G26300	Arginyl-tRNA synthetase, class Ic;	plastid	plastid:16251277	cytoskeleton:24134884;mitochondrion:27943495;plastid:20423899;plastid:21531424;plastid:18431481;plastid:20061580;plastid:24361574
AT4G26650	RNA-binding (RRM/RBD/RNP motifs) family protein;	nucleus
AT4G26750	hydroxyproline-rich glycoprotein family protein;	nucleus		extracellular:26572690
AT4G26870	Class II aminoacyl-tRNA and biotin synthetases superfamily protein;	cytosol		cytosol:21166475;golgi:25900983;golgi:25900983
AT4G27000	RNA-binding (RRM/RBD/RNP motifs) family protein;	nucleus		cytosol:21166475;plasma membrane:25641898
AT4G27060	ARM repeat superfamily protein;Encodes a novel, plant-specific microtubule-associated protein that regulates the orientation of cortical microtubules and the direction of organ growth. The protein plays a role in control of microtubule dependent anisotropic cell elongation. spr2 mutant rosette leaves, cauline leaves, roots, petioles and petals curl in an anticlockwise direction.	cytosol	cytoskeleton:15557095;cytoskeleton:18577573	cytoskeleton:24134884;golgi:25900983;golgi:25900983
AT4G27320	Adenine nucleotide alpha hydrolases-like superfamily protein;Contains a universal stress protein domain. Protein is phosphorylated in response to Phytophthora infestans zoospores and xylanase.	nucleus		extracellular:26572690;plasma membrane:25641898
AT4G27500	proton pump interactor 1;interacts with H+-ATPase, and regulates its activity	plasma membrane,endoplasmic reticulum		endoplasmic reticulum:16618929;endoplasmic reticulum:22923678;extracellular:26572690;golgi:25900983;golgi:25900983;golgi:25900983;golgi:25900983;golgi:25900983;plasma membrane:25641898;plasma membrane:14506206;plasma membrane:15308754;plasma membrane:17317660;plasma membrane:19334764;plasma membrane:20374526;plasma membrane:21433285;plasma membrane:22215637;plasma membrane:26781341;vacuole:259009…
AT4G27640	ARM repeat superfamily protein;	golgi		cytosol:21166475;golgi:25900983;golgi:25900983;golgi:25900983;golgi:25900983;golgi:25900983
AT4G27690	vacuolar protein sorting 26B;	golgi		golgi:25900983
AT4G28440	Nucleic acid-binding, OB-fold-like protein;	cytosol		cytoskeleton:24134884;cytosol:21166475;extracellular:26572690;golgi:25900983;mitochondrion:27943495;plasma membrane:15574830;plasma membrane:19334764;plastid:20061580
AT4G28470	26S proteasome regulatory subunit S2 1B;encoding the RPN subunits of the 26S proteasome	cytosol,nucleus		cytosol:14623885;golgi:25900983;vacuole:25900983
AT4G29040	regulatory particle AAA-ATPase 2A;26S proteasome AAA-ATPase subunit RPT2a (RPT2a) mRNA,	cytosol,nucleus	endoplasmic reticulum:23543785;golgi:23543785	golgi:25900983;golgi:25900983;golgi:25900983;golgi:25900983;golgi:25900983;mitochondrion:27122571;nucleus:27177187;plasma membrane:22215637
AT4G29160	SNF7 family protein;	nucleus		vacuole:23903016
AT4G29350	profilin 2;Encodes profilin2, a low-molecular weight, actin monomer-binding protein that regulates the organization of actin cytoskeleton. Expressed in vegetative organs. The first intron of PRF2 enhances gene expression.	cytosol	cytosol:21090759;endoplasmic reticulum:19200149;nucleus:21090759	extracellular:26572690;plasma membrane:17317660;plasma membrane:17644812;plasma membrane:22215637;plasma membrane:26781341;plastid:18431481;plastid:20423899;plastid:24361574
AT4G29810	MAP kinase kinase 2;encodes a MAP kinase kinase 2 that regulates MPK6 and MPK4 in response to cold and salt stresses. Co-expression with MEKK1 in protoplasts activated MKK2 activity, suggesting that MEKK1 may be a regulator of MKK2.	cytosol	cytosol:15610358	golgi:25900983;golgi:25900983;golgi:25900983;golgi:25900983;golgi:25900983;plasma membrane:17317660;vacuole:25900983
AT4G30160	villin 4;Arabidopsis thaliana VILLIN4	cytosol		cytosol:21166475;extracellular:26572690;plasma membrane:26781341
AT4G30260	Integral membrane Yip1 family protein;	golgi		cytosol:21166475;golgi:22430844;golgi:22923678;golgi:25900983;golgi:25122472;golgi:25900983;golgi:21826108;golgi:25900983;plasma membrane:25641898;plasma membrane:15060130;vacuole:25900983
AT4G30890	ubiquitin-specific protease 24;Encodes a ubiquitin-specific protease.	nucleus		cytosol:18433157;nucleus:18433157
AT4G31120	SHK1 binding protein 1;Involved in vernalization. Required for epigenetic silencing of FLC, and for vernalization-mediated histone modification.	cytosol		cytosol:21166475;mitochondrion:27122571
AT4G31180	Class II aminoacyl-tRNA and biotin synthetases superfamily protein;	cytosol		cytosol:21166475;extracellular:15157177;extracellular:26572690;plasma membrane:25641898
AT4G31340	myosin heavy chain-related;	endoplasmic reticulum		endoplasmic reticulum:16618929;endoplasmic reticulum:22923678;golgi:22430844;golgi:25900983;golgi:25900983;golgi:25900983;golgi:25900983;golgi:25900983;plasma membrane:25641898;plasma membrane:19334764;plasma membrane:22215637;plasma membrane:26781341;vacuole:17151019
AT4G31480	Coatomer, beta subunit;	cytosol		cytosol:21166475;golgi:25900983;golgi:25900983;golgi:25900983;nucleus:23396599;plasma membrane:19334764;plasma membrane:21433285;vacuole:25900983
AT4G31490	Coatomer, beta subunit;	golgi		cytosol:21166475;golgi:25900983;golgi:25900983;golgi:25900983;golgi:25900983;golgi:25900983
AT4G31580	serine/arginine-rich 22;Encodes a Serine/arginine-rich (SR) protein RSZp22. SR proteins are splicing regulators that share a modular structure consisting of one or two N-terminal RNA recognition motif domains and a C-terminal RS-rich domain. RSZp22 is located in the nucleolus. It is a nucleocytoplasmic shuttling protein and an interacting partner to the Arabidopsis U1-70K.	nucleus	nucleus:15133128;nucleus:15686520;nucleus:23404887	extracellular:26572690
AT4G31790	Tetrapyrrole (Corrin/Porphyrin) Methylases;	cytosol
AT4G32180	pantothenate kinase 2;Encodes a protein with pantothenate kinase activity.	cytosol		cytosol:21166475
AT4G32285	ENTH/ANTH/VHS superfamily protein;	cytosol		cytosol:18433157;cytosol:20374526;golgi:25900983;golgi:25900983;golgi:25900983;golgi:25900983;nucleus:18433157;plasma membrane:17317660;plasma membrane:19334764;plasma membrane:20843791;plasma membrane:21433285;plasma membrane:22318864;plasma membrane:26781341;vacuole:18686298
AT4G32640	Sec23/Sec24 protein transport family protein;	cytosol		cytosol:21166475;plasma membrane:21433285
AT4G32760	ENTH/VHS/GAT family protein;	plasma membrane		plasma membrane:17317660;plasma membrane:22215637;plasma membrane:26781341
AT4G32930	;	cytosol
AT4G33070	Thiamine pyrophosphate dependent pyruvate decarboxylase family protein;	cytosol		cytosol:21166475;plasma membrane:19334764;vacuole:23903016
AT4G33250	eukaryotic translation initiation factor 3K;Encodes initiation factor 3k (EIF3k).	cytosol		cytosol:21166475;nucleus:23396599;vacuole:23903016
AT4G33400	Vacuolar import/degradation, Vid27-related protein;	golgi	endoplasmic reticulum:23543785;golgi:23543785	cytosol:22522809;plasma membrane:17317660
AT4G33510	3-deoxy-d-arabino-heptulosonate 7-phosphate synthase;Enzyme catalyzing the first committed step in aromatic amino acid biosynthesis	plastid		cytosol:28611809;golgi:25900983;golgi:25900983;golgi:25900983;golgi:25900983;golgi:25900983;nucleus:27177187;plasma membrane:25641898;plastid:18431481;plastid:20423899;plastid:21531424;plastid:23851315;plastid:20061580;plastid:24872594;vacuole:25900983
AT4G33650	dynamin-related protein 3A;Encodes a protein with high sequence similarity to the dynamin superfamily. Among those members ADL2 was most closely related to Dnm1p of yeast and likely a member of the Vps1p subfamily. Widely expressed in various tissues with highest expression in flower tissues. Localizes to the chloroplast, mitochondrion and peroxisome. Involved in peroxisome and mitochondria fissi…	mitochondrion	cytosol:18559960;mitochondrion:14988495;mitochondrion:15086806;peroxisome:15086806;plastid:9747851	golgi:25900983;golgi:25900983;golgi:25900983;golgi:25900983;golgi:25900983;mitochondrion:27122571;nucleus:23396599;plasma membrane:25641898;plasma membrane:19334764;vacuole:23903016;vacuole:25900983
AT4G33945	ARM repeat superfamily protein;	cytosol	cytosol:22623495
AT4G34050	S-adenosyl-L-methionine-dependent methyltransferases superfamily protein;	cytosol		extracellular:26572690;plasma membrane:22318864;vacuole:25900983
AT4G34110	poly(A) binding protein 2;Putative poly-A binding protein. Member of a gene family .Expressed in stele and root meristem and post-fertilization ovules.Member of the class II family of PABP proteins.	nucleus		cytosol:21166475;extracellular:26572690;plasma membrane:25641898;plasma membrane:21433285;plasma membrane:22215637;plasma membrane:26781341
AT4G34270	TIP41-like family protein;	cytosol		cytosol:21166475
AT4G34350	4-hydroxy-3-methylbut-2-enyl diphosphate reductase;Arabidopsis ISPH is involved in the plastid nonmevalonate pathway of isoprenoid biosynthesis. It was shown to complement the lethal phenotype of E. coli ispH mutant and is therefore most likely encodes a protein with 4-hydroxy-3-methylbut-2-en-1-yl diphosphate reductase activity involved in the last step of mevalonate-independent isopentenyl bios…	plastid		golgi:25900983;mitochondrion:27122571;plastid:21531424;plastid:18633119;plastid:20061580;plastid:24361574;plastid:24872594;vacuole:25900983
AT4G34450	coatomer gamma-2 subunit, putative / gamma-2 coat protein, putative / gamma-2 COP, putative;	cytosol		cytosol:21166475;extracellular:26572690;golgi:25900983;golgi:25900983;golgi:25900983;golgi:25900983;golgi:25900983;nucleus:23396599;plasma membrane:25641898;plasma membrane:19334764;plasma membrane:21433285;plasma membrane:22215637;plasma membrane:22923678;vacuole:23903016;vacuole:25900983
AT4G34490	cyclase associated protein 1;CYCLASE ASSOCIATED PROTEIN	cytosol		cytosol:21166475;extracellular:26572690;golgi:25900983;golgi:25900983;golgi:25900983;golgi:25900983;plasma membrane:25641898;plasma membrane:26781341;vacuole:25900983
AT4G34870	rotamase cyclophilin 5;belongs to cyclophilin family	cytosol	cytosol:19329564;nucleus:19329564;plasma membrane:19329564	cytosol:21166475;extracellular:26572690;golgi:22430844;golgi:25900983;mitochondrion:27943495;peroxisome:19329564;plasma membrane:17644812;plasma membrane:19334764;plasma membrane:22215637;plasma membrane:26781341;plastid:20423899;plastid:24361574;vacuole:17151019
AT4G34920	PLC-like phosphodiesterases superfamily protein;	cytosol		cytosol:21166475;extracellular:26572690
AT4G35360	Uncharacterised conserved protein (UCP030210);	cytosol		golgi:25900983
AT4G35450	ankyrin repeat-containing protein 2;Involved in targeting of chloroplast outer membrane proteins to the chloroplast. Double mutants of AKR2A and the highly homologous AKR2B have yellow leaves, significantly reduced chloroplast proteins, and no thylakoid membranes.	cytosol		golgi:25900983;plasma membrane:25641898;plasma membrane:22215637;vacuole:25900983
AT4G35890	winged-helix DNA-binding transcription factor family protein;	plastid
AT4G36020	cold shock domain protein 1;Encodes a cold shock domain protein. Involved in cold acclimation by blocking the secondary structure of mRNA which in turn facilitates translation at cold temperature.	nucleus		golgi:25900983;golgi:25900983
AT4G36350	purple acid phosphatase 25;	extracellular		extracellular:14595688;extracellular:16356755
AT4G37190	;	golgi		golgi:25900983;golgi:25900983;golgi:25900983;vacuole:17151019
AT4G37210	Tetratricopeptide repeat (TPR)-like superfamily protein;	cytosol
AT4G38220	Peptidase M20/M25/M40 family protein;	endoplasmic reticulum		endoplasmic reticulum:22923678;extracellular:26572690;golgi:22430844;plasma membrane:25641898;plasma membrane:19334764;plasma membrane:22215637;plasma membrane:26781341
AT4G38370	Phosphoglycerate mutase family protein;	cytosol		cytosol:21166475
AT4G38400	expansin-like A2;member of EXPANSIN-LIKE. Naming convention from the Expansin Working Group (Kende et al, 2004. Plant Mol Bio)	extracellular		extracellular:28155257
AT4G38460	geranylgeranyl reductase;	plastid		golgi:25900983;plastid:20423899;plastid:21531424;plastid:18431481;plastid:20061580;plastid:24361574;plastid:24872594
AT4G38630	regulatory particle non-ATPase 10;Regulatory particle non-ATPase subunit of the 26S proteasome with multiubiquitin-chain-binding capabilities	cytosol		cytosol:14623898;cytosol:18433157;golgi:25900983;golgi:25900983;golgi:25900983;golgi:25900983;nucleus:18433157;nucleus:27177187;plasma membrane:21433285;vacuole:25900983
AT4G38740	rotamase CYP 1;Encodes cytosolic cyclophilin ROC1.	cytosol	cytosol:19329564	cytosol:21166475;extracellular:26572690;mitochondrion:27943495;peroxisome:19329564;plasma membrane:15574830;plasma membrane:17644812;plasma membrane:19334764;plasma membrane:22215637;plasma membrane:26781341;plastid:24361574
AT4G38800	methylthioadenosine nucleosidase 1;	cytosol		cytosol:21166475;extracellular:26572690;plasma membrane:25641898;plasma membrane:17644812;plasma membrane:26781341
AT4G38890	FMN-linked oxidoreductases superfamily protein;	cytosol,nucleus		vacuole:14760709
AT4G38930	Ubiquitin fusion degradation UFD1 family protein;	cytosol
AT4G39150	DNAJ heat shock N-terminal domain-containing protein;	cytosol		cytosol:21166475;golgi:25900983;golgi:25900983;plasma membrane:19334764;plasma membrane:22215637;vacuole:25900983
AT4G39230	NmrA-like negative transcriptional regulator family protein;encodes a protein whose sequence is similar to phenylcoumaran benzylic ether reductase (PCBER), which catalyzes NADPH-dependent reduction of 8-5' linked lignans such as dehydrodiconiferyl alcohol to give isodihydrodehydrodiconiferyl alcohol.	cytosol
AT4G39260	cold, circadian rhythm, and RNA binding 1;Encodes a glycine-rich protein with RNA binding domain at the N-terminus. Protein is structurally similar to proteins induced by stress in other plants. Gene expression is induced by cold. Transcript undergoes circadian oscillations that is depressed by overexpression of AtGRP7. A substrate of the type III effector HopU1 (mono-ADP-ribosyltransferase).	nucleus	nucleus:15496452;nucleus:24130194	extracellular:26572690;golgi:22430844;golgi:25900983;golgi:25900983;golgi:25900983;nucleus:15496452;nucleus:24012629;nucleus:27177187;peroxisome:17951448;peroxisome:19329564;plasma membrane:25641898;plasma membrane:15574830;plasma membrane:17644812;plasma membrane:22215637;plasma membrane:26781341;plastid:15028209;plastid:20061580;plastid:24872594;vacuole:25900983
AT4G39280	phenylalanyl-tRNA synthetase, putative / phenylalanine--tRNA ligase, putative;	cytosol		cytosol:21166475
AT4G39520	GTP-binding protein-related;Encodes a member of the DRG (developmentally regulated G-protein) family. Has GTPase activity.	cytosol		cytoskeleton:24134884;cytosol:21166475;golgi:25900983;golgi:25900983;golgi:25900983;golgi:25900983;golgi:25900983;plasma membrane:19334764;vacuole:25900983
AT4G39730	Lipase/lipooxygenase, PLAT/LH2 family protein;	plastid		golgi:25900983;golgi:25900983;golgi:25900983;plasma membrane:25641898;plasma membrane:17644812;plasma membrane:22215637;plasma membrane:22923678;plasma membrane:26781341;plastid:14729914;plastid:15028209;plastid:15322131;plastid:16648217;plastid:21539947;plastid:22274653;vacuole:17151019
AT4G39980	3-deoxy-D-arabino-heptulosonate 7-phosphate synthase 1;Encodes a 2-deoxy-D-arabino-heptulosonate 7-phosphate (DAHP) synthase, which catalyzes the first committed step in aromatic amino acid biosynthesis. Gene expression is induced by wounding and pathogenic bacteria Pseudomonas syringae.	plastid		golgi:25900983;golgi:25900983;golgi:25900983;golgi:25900983;golgi:25900983;mitochondrion:22923678;mitochondrion:27943495;plasma membrane:19334764;plastid:23851315;plastid:24872594;vacuole:25900983
AT4G39990	RAB GTPase homolog A4B;GTP-binding protein ATGB3	golgi	golgi:21134079	golgi:25900983;golgi:25900983;golgi:25900983;golgi:25900983;golgi:21826108;golgi:25900983;plasma membrane:17317660;plasma membrane:19334764;vacuole:25900983
AT5G02490	Heat shock protein 70 (Hsp 70) family protein;	cytosol		cytosol:21166475;cytosol:22522809;golgi:22430844;golgi:25900983;golgi:25900983;golgi:25900983;golgi:21826108;golgi:25900983;nucleus:23396599;plasma membrane:17317660;plasma membrane:17644812;plasma membrane:21433285;plasma membrane:22215637;plastid:20061580;plastid:20061580;plastid:24361574;vacuole:23903016
AT5G02500	heat shock cognate protein 70-1;encodes a member of heat shock protein 70 family.	cytosol		cytosol:22522809;extracellular:26572690;golgi:22430844;golgi:25900983;golgi:25900983;golgi:25900983;golgi:25900983;golgi:25900983;mitochondrion:24727099;mitochondrion:27943495;nucleus:14617066;nucleus:15496452;nucleus:23396599;peroxisome:19329564;plasma membrane:25641898;plasma membrane:15574830;plasma membrane:17317660;plasma membrane:17644812;plasma membrane:19334764;plasma membrane:20843791;pl…
AT5G02530	RNA-binding (RRM/RBD/RNP motifs) family protein;	nucleus		cytoskeleton:24134884;extracellular:26572690
AT5G03540	exocyst subunit exo70 family protein A1;AtEXO70A1 is a member of EXO70 gene family, putative exocyst subunits, conserved in land plants. Arabidopsis thaliana contains 23 putative EXO70 genes, which can be classified into nine clusters on the phylogenetic tree	plasma membrane	cytosol:20870962;cytosol:20870962;nucleus:19789280;plasma membrane:20870962;plasma membrane:23283982;plasma membrane:24307681	golgi:25900983;golgi:25900983;golgi:25900983;golgi:25900983;plasma membrane:17317660;plasma membrane:17644812;plasma membrane:19334764;plasma membrane:21433285;plasma membrane:22215637;plasma membrane:22318864;plasma membrane:26781341
AT5G03740	histone deacetylase 2C;HD2-type histone deacetylase HDAC. Involved in the ABA and stress responses. Mediates transcriptional repression	nucleus	nucleus:15144374;nucleus:15496452;nucleus:16553900	cytoskeleton:24134884;extracellular:26572690;nucleus:15496452
AT5G04430	binding to TOMV RNA 1L (long form);Gene model AT5G04430.1 produces active protein. (BTS1S). Binds to ToMV genomic RNA and prevents viral multiplication.	nucleus		extracellular:26572690;golgi:25900983;plasma membrane:22215637;plasma membrane:26781341;vacuole:25900983
AT5G05010	clathrin adaptor complexes medium subunit family protein;	golgi		cytosol:21166475;extracellular:26572690;golgi:25900983;golgi:25900983;golgi:25900983;golgi:25900983;golgi:25900983;plasma membrane:19334764;plasma membrane:26781341;vacuole:25900983
AT5G05730	anthranilate synthase alpha subunit 1;ASA1 encodes the alpha subunit of anthranilate synthase, which catalyzes the rate-limiting step of tryptophan synthesis. ASA1 is induced by ethylene, and forms a link between ethylene signalling and auxin synthesis in roots.	plastid		extracellular:26572690;mitochondrion:21841088;plastid:18431481;plastid:21531424;plastid:20061580;plastid:24361574;plastid:24872594
AT5G05780	RP non-ATPase subunit 8A;Encodes a putative 26S proteasome subunit RPN8a. The function of RPN8a and other 26S subunits may be required for specifying leaf adaxial identity.	cytosol,nucleus		cytosol:14623894;cytosol:21166475;golgi:25900983;golgi:25900983;golgi:25900983;plasma membrane:25641898;plasma membrane:19334764;vacuole:25900983
AT5G05980	DHFS-FPGS homolog B;	cytosol	cytosol:21502816;plastid:21502816	cytosol:21166475;extracellular:26572690;golgi:25900983;golgi:25900983;golgi:25900983;vacuole:25900983
AT5G06110	DnaJ domain ;Myb-like DNA-binding domain;	nucleus
AT5G06140	sorting nexin 1;Homolog of yeast retromer subunit VPS5. Part of a retromer-like protein complex involved in endosome to lysosome protein transport. In roots it co-localizes with the PIN2 auxin efflux carrier. Involved in endocytic sorting of membrane proteins including PIN2, BOR1 and BRI1.	cytosol	golgi:16936718;golgi:19796370	cytosol:21166475;golgi:25900983;golgi:25900983;golgi:25900983;golgi:25900983;vacuole:25900983
AT5G06600	ubiquitin-specific protease 12;Encodes a ubiquitin-specific protease.	cytosol	cytosol:23645632;nucleus:23645632	cytosol:21166475;golgi:25900983;golgi:25900983
AT5G07350	TUDOR-SN protein 1;RNA binding protein with nuclease activity essential for stress response. Involved in mechanisms acting on mRNAs entering the secretory pathway. Functionally redundant with TSN2.	nucleus		cytoskeleton:24134884;cytosol:18433157;cytosol:21166475;golgi:25900983;golgi:25900983;golgi:25900983;golgi:25900983;golgi:25900983;nucleus:18433157;plasma membrane:15574830;plasma membrane:17317660;plasma membrane:19334764;plasma membrane:20374526;plasma membrane:21433285;plasma membrane:22215637;plasma membrane:26781341;plastid:15028209;plastid:24872594;vacuole:25900983
AT5G07370	inositol polyphosphate kinase 2 alpha;Encodes inositol polyphosphate kinase, which phosphorylates inositol 1,4,5-triphosphate and inositol 1,3,4,5-tetrakisphosphate to generate inositol 1,3,4,5,6-pentakisphosphate	cytosol		cytosol:21166475
AT5G08120	movement protein binding protein 2C;Microtubule-associated and viral movement protein binding protein. Negatively regulates KN1 association to plasmodesmata and, consequently, cell-to-cell transport. Involved in the alignment of cortical microtubules, the patterning of stomata and in restricting tobamoviral infections.	cytosol	cytoskeleton:19074626	cytoskeleton:24134884
AT5G08160	serine/threonine protein kinase 3;Encodes a serine/threonine protein kinase.	cytosol		cytosol:21166475;plasma membrane:19334764
AT5G08580	Calcium-binding EF hand family protein;	endoplasmic reticulum		endoplasmic reticulum:22923678;golgi:22430844;plasma membrane:25641898;plasma membrane:17317660
AT5G09650	pyrophosphorylase 6;Encodes a protein with inorganic pyrophosphatase activity.	plastid		extracellular:26572690;mitochondrion:21296373;mitochondrion:24727099;mitochondrion:27943495;plasma membrane:19334764;plastid:12938931;plastid:16207701;plastid:16648217;plastid:20423899;plastid:21531424;plastid:22923678;plastid:23851315;plastid:18431481;plastid:18633119;plastid:20061580;plastid:21539947;plastid:24361574;plastid:24872594;plastid:18431481
AT5G09810	actin 7;Member of Actin gene family.Mutants are defective in germination and root growth.	cytosol	unclear:15496452	cytosol:21166475;golgi:25900983;golgi:25900983;golgi:25900983;golgi:25900983;golgi:25900983;mitochondrion:14671022;mitochondrion:27943495;nucleus:15496452;nucleus:24012629;nucleus:23396599;plasma membrane:25641898;plasma membrane:17317660;plasma membrane:17644812;plasma membrane:19334764;plasma membrane:20843791;plasma membrane:21433285;plasma membrane:22215637;plasma membrane:26781341;plasma mem…
AT5G09900	26S proteasome regulatory subunit, putative (RPN5);Encodes one of two isoforms for the 26S proteasome regulatory protein (RN) subunit RPN5. For many functions it acts redundantly with the paralogous gene RPN5b but also appears to exert independent effects.	cytosol,nucleus		cytosol:14623890;cytosol:21166475;golgi:25900983;golgi:25900983;golgi:25900983;golgi:25900983;golgi:25900983;mitochondrion:27122571;plasma membrane:19334764;plasma membrane:22215637;vacuole:25900983
AT5G10240	asparagine synthetase 3;Encodes asparagine synthetase (ASN3).	cytosol		cytosol:21166475
AT5G10540	Zincin-like metalloproteases family protein;	cytosol	cytosol:24043784	cytosol:21166475;extracellular:26572690;plasma membrane:25641898;plastid:15028209;plastid:23851315;plastid:24361574;vacuole:23903016
AT5G10980	Histone superfamily protein;	nucleus		mitochondrion:24727099
AT5G11040	TRS120;	golgi	golgi:24443495	golgi:25900983;golgi:25900983;golgi:21826108;golgi:25900983;plasma membrane:25641898;plasma membrane:19334764;plasma membrane:21433285;vacuole:25900983
AT5G11110	sucrose phosphate synthase 2F;Encodes a protein with putative sucrose-phosphate synthase activity.Involved in pollen exine formation.	cytosol		plasma membrane:17317660
AT5G11200	DEAD/DEAH box RNA helicase family protein ;	nucleus		golgi:25900983;golgi:25900983
AT5G11710	ENTH/VHS family protein;EPSIN1 plays an important role in the vacuolar trafficking of soluble proteins at the trans-Golgi network via its interaction with gamma-ADR, VTI11, VSR1, and clathrin. Associated with actin filaments and with the Golgi complex. Expressed in most tissues.	vacuole,golgi	cytoskeleton:16905657;golgi:16905657;vacuole:16905657	plastid:14729914
AT5G11850	Protein kinase superfamily protein;	cytosol		plasma membrane:14506206
AT5G11880	Pyridoxal-dependent decarboxylase family protein;	plastid		cytosol:21166475;plastid:18431481;plastid:20423899;plastid:21531424;plastid:23851315;plastid:20061580;plastid:24361574
AT5G11900	Translation initiation factor SUI1 family protein;	cytosol
AT5G12110	Glutathione S-transferase, C-terminal-like;Translation elongation factor EF1B/ribosomal protein S6;	cytosol		cytosol:22522809
AT5G12210	RAB geranylgeranyl transferase beta subunit 1;	cytosol		cytosol:21166475
AT5G12250	beta-6 tubulin;Encodes a beta-tubulin. Expression of TUB6 has been shown to decrease in response to cold treatment.	cytosol	cytoskeleton:15509858;cytoskeleton:17220198;cytoskeleton:15998306	cytoskeleton:24134884;cytosol:28611809;golgi:25900983;golgi:25900983;golgi:25900983;golgi:25900983;golgi:25900983;nucleus:14505352;plasma membrane:15574830;plasma membrane:17317660;plasma membrane:19334764;plasma membrane:22215637;plasma membrane:26781341;vacuole:25900983
AT5G12370	exocyst complex component sec10;	plasma membrane	cytosol:23163883;cytosol:24307681;plasma membrane:23163883;plasma membrane:24307681	golgi:25900983;golgi:25900983;golgi:25900983;golgi:25900983;golgi:25900983;plasma membrane:25641898;plasma membrane:17644812;plasma membrane:19334764;plasma membrane:21433285;plasma membrane:22215637;plasma membrane:22318864;plasma membrane:26781341;vacuole:25900983
AT5G13030	;	plastid		golgi:25900983;golgi:25900983;golgi:25900983;mitochondrion:27943495;plasma membrane:21433285;plastid:21531424;plastid:18431481;plastid:20061580;plastid:24361574
AT5G13050	5-formyltetrahydrofolate cycloligase;5-Formyltetrahydrofolate cycloligase (5-CHO-THF cycloligase - AT5G13050.1) regulates/influences under photorespiratory conditions the activity of another gene product, i.e. serine hydroxymethyltransferase (SHMT) due to accumulating amounts of 5-Formyltetrahydrofolate	plastid		plastid:14729914
AT5G13110	glucose-6-phosphate dehydrogenase 2;Encodes a plastidic glucose-6-phosphate dehydrogenase that is sensitive to reduction by DTT and whose mRNA is most highly expressed in root.	plastid		golgi:25900983;golgi:25900983;golgi:25900983;golgi:25900983;plastid:20061580
AT5G13120	cyclophilin 20-2;Encodes a lumenal cyclophilin with peptidyl-prolyl isomerase activity that is associated with the NAD(P)H dehydrogenase complex in stromal regions of the thylakoid membrane. It is likely to be important for the accumulation of the hydrophobic domain of the NAD(P)H dehydrogenase complex. This complex is associated with PSI and is responsible for the reduction of plastoquinone.	plastid		extracellular:26572690;plastid:11719511;plastid:11826309;plastid:14729914;plastid:15028209;plastid:15322131;plastid:20423899;plastid:21531424;plastid:23851315;plastid:24361574;plastid:16923014;plastid:18431481;plastid:20061580;plastid:23667806
AT5G13260	;	nucleus		cytoskeleton:24134884;plasma membrane:26781341
AT5G13280	aspartate kinase 1;Asp kinase inhibited by Lys and S-adenosylmethionine. Contains regulatory domains that belong to the ACT domain family, which allow binding to a extreme variety of ligands. Can function as a monomer or as a dimer with acetohydroxyacid synthase (HSDH).	plastid		golgi:25900983;golgi:25900983;golgi:25900983;golgi:25900983;golgi:25900983;plastid:20061580;plastid:24872594;vacuole:25900983
AT5G13420	Aldolase-type TIM barrel family protein;	plastid		extracellular:26572690;golgi:25900983;mitochondrion:14671022;mitochondrion:21841088;mitochondrion:27122571;mitochondrion:27943495;plasma membrane:19334764;plastid:15028209;plastid:16207701;plastid:18431481;plastid:20423899;plastid:21531424;plastid:22923678;plastid:20061580;plastid:24361574;plastid:24872594
AT5G13530	protein kinases;ubiquitin-protein ligases;Encodes KEEP ON GOING (KEG), a RING E3 ligase involved in abscisic acid signaling. KEG is essential for Arabidopsis growth and development. ABA promotes KEG degradation via the ubiquitin dependent 26S proteasome pathway.	golgi	golgi:21343429	golgi:25900983;golgi:25900983;golgi:25900983;plasma membrane:19334764
AT5G13560	;	golgi		cytosol:21166475;golgi:25900983;golgi:25900983;golgi:25900983;golgi:25900983;plasma membrane:21433285;vacuole:25900983
AT5G13650	elongation factor family protein;	plastid		golgi:25900983;golgi:25900983;golgi:25900983;plastid:16207701;plastid:20423899;plastid:21531424;plastid:18431481;plastid:18633119;plastid:20061580;plastid:24361574;vacuole:25900983
AT5G13710	sterol methyltransferase 1;SMT1 controls the level of cholesterol in plants	golgi		endoplasmic reticulum:22923678;golgi:25900983;golgi:25900983;golgi:25900983;golgi:25900983;mitochondrion:27943495;plasma membrane:19334764;plasma membrane:22215637;plasma membrane:26781341;vacuole:15539469;vacuole:23903016;vacuole:25900983
AT5G13780	Acyl-CoA N-acyltransferases (NAT) superfamily protein;	cytosol		plasma membrane:19334764
AT5G14030	translocon-associated protein beta (TRAPB) family protein;	endoplasmic reticulum		endoplasmic reticulum:22923678;golgi:22430844;golgi:25900983;plasma membrane:25641898;plasma membrane:19334764;plasma membrane:22215637;plasma membrane:26781341;vacuole:17151019
AT5G14060	Aspartate kinase family protein;lysine-sensitive aspartate kinase	plastid		plastid:20061580;plastid:24872594
AT5G14170	SWIB/MDM2 domain superfamily protein;CHC1 is predicted to encode a protein that belongs to the chromodomain remodeling complex. Two RNAi knock-down lines have a dwarf phenotype and reduced rates of Agrobacterium-mediated transformation. The low rate of root-mediated transformation rate may result from altered root morphology or reduced root growth rates.	nucleus		cytoskeleton:24134884;nucleus:23396599
AT5G14250	Proteasome component (PCI) domain protein;Encodes subunit 3 of the COP9 signalosome.	nucleus		cytosol:21166475;golgi:25900983
AT5G14520	pescadillo-related;	nucleus	nucleus:23909681	nucleus:27177187;nucleus:23396599
AT5G14790	ARM repeat superfamily protein;	nucleus		golgi:25900983;golgi:25900983;vacuole:25900983
AT5G15400	U-box domain-containing protein;	cytosol		cytosol:21166475;golgi:25900983;golgi:25900983
AT5G15450	casein lytic proteinase B3;Encodes a chloroplast-targeted Hsp101 homologue. Functions as a molecular chaperone involved in plastid differentiation mediating internal thylakoid membrane formation and conferring thermotolerance to chloroplasts during heat stress. APG6 is constitutively expressed in the root tips, the organ boundary region, the reproductive tissues of mature plants where plastids ex…	plastid		golgi:25900983;golgi:25900983;mitochondrion:21841088;mitochondrion:27943495;plastid:16207701;plastid:21531424;plastid:23851315;plastid:18431481;plastid:18633119;plastid:20061580;plastid:24361574;plastid:24872594
AT5G15610	Proteasome component (PCI) domain protein;	cytosol,nucleus		nucleus:23396599
AT5G16280	Tetratricopeptide repeat (TPR)-like superfamily protein;	golgi		golgi:25900983;golgi:25900983;golgi:25900983;golgi:21826108;golgi:25900983;vacuole:25900983
AT5G16290	VALINE-TOLERANT 1;	plastid		cytosol:21166475;mitochondrion:21841088;plastid:21531424
AT5G16300	Vps51/Vps67 family (components of vesicular transport) protein;	golgi		cytosol:21166475;golgi:25900983;golgi:25900983;golgi:25900983;golgi:25900983;golgi:25900983;vacuole:25900983
AT5G16390	chloroplastic acetylcoenzyme A carboxylase 1;Encodes for the biotin carboxyl-carrier subunit of the multi-enzyme plastidial acetyl-coenzyme A carboxylase complex.	plastid		plastid:20423899;plastid:21531424;plastid:22923678;plastid:23851315;plastid:26987276;plastid:18431481;plastid:20061580;plastid:18431481;plastid:20061580;plastid:24361574
AT5G16440	isopentenyl diphosphate isomerase 1;Encodes a protein with isopentenyl diphosphate:dimethylallyl diphosphate isomerase activity. There is genetic evidence that it functions in the mevalonate, but not the MEP biosynthetic pathway.	plastid		cytosol:21166475;extracellular:26572690;plastid:18431481;plastid:20423899;plastid:21531424;plastid:20061580;plastid:24361574
AT5G16990	Zinc-binding dehydrogenase family protein;molecular function has not been defined, was shown involved in oxidative stress tolerance.	cytosol		cytosol:21166475;plasma membrane:17644812
AT5G17020	exportin 1A;Encodes a member of the exportin protein family (XPO1A) which functions as receptors for nuclear export. Binds to a variety of proteins having leucine rich export signals.Along with XPO1B involved with development of the male and female gametophytes.	nucleus	nucleus:10652141	cytosol:21166475;golgi:25900983;golgi:25900983;golgi:25900983;golgi:25900983;plasma membrane:19334764
AT5G17060	ADP-ribosylation factor B1B;A member of ARF GTPase family. A thaliana has 21 members of this family, known to be essential for vesicle coating and uncoating and functions in GTP-binding. Gene encoding ADP-ribosylation factor and similar to ADP-ribosylation factor 1; ARF 1 (GP:385340) {Drosophila melanogaster), other ARFs and ARF-like proteins.	cytosol
AT5G17380	Thiamine pyrophosphate dependent pyruvate decarboxylase family protein;	peroxisome		cytosol:21166475;extracellular:26572690;mitochondrion:27122571;mitochondrion:27943495;plasma membrane:26781341
AT5G18070	phosphoglucosamine mutase-related;encodes a novel protein involved in DNA repair from UV damage. Isolated by functional complementation of E. coli UV-sensitive mutants (UVR genes).	mitochondrion,plastid		mitochondrion:14671022;plastid:24872594
AT5G18230	transcription regulator NOT2/NOT3/NOT5 family protein;	nucleus		golgi:25900983;golgi:25900983;golgi:25900983
AT5G18420	;	golgi		golgi:25900983;golgi:25900983;golgi:25900983;vacuole:25900983
AT5G19180	E1 C-terminal related 1;Encodes a subunit of a RUB-activating enzyme analogous to the E1 ubiquitin-activating enzyme. ECR1 functions as a heterodimer with AXR1 to activate RUB, a ubiquitin-related protein.	peroxisome		peroxisome:14581625
AT5G19320	RAN GTPase activating protein 2;Encodes RAN GTPase activating protein 2. The protein is localized to the nuclear envelope during interphase.	cytosol,nucleus	nucleus:12061901	endoplasmic reticulum:16618929;endoplasmic reticulum:22923678;extracellular:26572690;plasma membrane:21433285;plastid:15028209;vacuole:17151019
AT5G19440	NAD(P)-binding Rossmann-fold superfamily protein;similar to Eucalyptus gunnii alcohol dehydrogenase of unknown physiological function (GI:1143445), apple tree, PIR:T16995; NOT a cinnamyl-alcohol dehydrogenase	cytosol	cytosol:26980300;nucleus:26980300	cytosol:21166475;golgi:22430844;plasma membrane:17644812;vacuole:23903016
AT5G19485	transferases;nucleotidyltransferases;	extracellular
AT5G19510	Translation elongation factor EF1B/ribosomal protein S6 family protein;	cytosol		cytosol:21166475;cytosol:22522809;golgi:25900983;golgi:25900983;golgi:25900983;golgi:25900983;golgi:25900983;nucleus:27177187;plasma membrane:25641898;plasma membrane:19334764;plasma membrane:22215637;plasma membrane:26781341;vacuole:22923678;vacuole:23903016;vacuole:25900983
AT5G19820	ARM repeat superfamily protein;	golgi		cytosol:21166475;golgi:25900983;golgi:25900983;golgi:25900983;golgi:25900983;golgi:25900983;plasma membrane:19334764;plasma membrane:22215637;plasma membrane:26781341;vacuole:25900983
AT5G19990	regulatory particle triple-A ATPase 6A;26S proteasome AAA-ATPase subunit	cytosol,nucleus		cytosol:21166475;extracellular:26572690;golgi:25900983;golgi:25900983;plasma membrane:25641898;plasma membrane:17317660;plasma membrane:22215637;vacuole:25900983
AT5G20160	Ribosomal protein L7Ae/L30e/S12e/Gadd45 family protein;	nucleus	nucleus:15496452	cytoskeleton:24134884;nucleus:15496452
AT5G20280	sucrose phosphate synthase 1F;Encodes a protein with putative sucrose-phosphate synthase activity. When the gene was expressed in transgenic tobacco plants, a clear trend for increased SPS activity was noted.	cytosol		cytosol:21166475;golgi:25900983;plasma membrane:25641898;plasma membrane:17317660;plasma membrane:17644812;plasma membrane:19334764;plasma membrane:20374526;plasma membrane:21433285;vacuole:18686298
AT5G20400	2-oxoglutarate (2OG) and Fe(II)-dependent oxygenase superfamily protein;encodes a protein whose sequence is similar to flavanone 3 hydroxylase from Malus.	cytosol		cytosol:21166475
AT5G20570	RING-box 1;Encodes a ring-box 1 like protein and component of the SCF ubiquitinization complex mediating auxin responses. Forms a E3 ubiquitin ligase complex with CUL3A and At1g21780.1 a BTB domain protein.	nucleus
AT5G20890	TCP-1/cpn60 chaperonin family protein;	cytosol		cytosol:21166475;extracellular:26572690;golgi:25900983;golgi:25900983;golgi:25900983;golgi:25900983;golgi:25900983;mitochondrion:27122571;plasma membrane:25641898;plasma membrane:16602701;plasma membrane:19334764;plasma membrane:21433285;plasma membrane:26781341;vacuole:25900983
AT5G20920	eukaryotic translation initiation factor 2 beta subunit;protein synthesis initiation factor eIF2 beta	cytosol		cytoskeleton:24134884;extracellular:26572690;golgi:25900983;golgi:25900983;golgi:25900983;golgi:25900983;golgi:25900983;nucleus:24012629;plasma membrane:17317660;plasma membrane:22215637
AT5G20950	Glycosyl hydrolase family protein;	extracellular		extracellular:14595688;extracellular:15593128;extracellular:16287169;extracellular:16356755;extracellular:24393051;extracellular:26572690;extracellular:28155257;extracellular:25852701;golgi:25900983;golgi:25900983;golgi:25900983;golgi:25900983;plasma membrane:19334764;plasma membrane:21433285;vacuole:25900983
AT5G20990	molybdopterin biosynthesis CNX1 protein / molybdenum cofactor biosynthesis enzyme CNX1 (CNX1);Involved in molybdenum cofactor (Moco) biosynthesis, inserting Mo into Molybdopterin. sir loss-of-function mutants are resistant to sirtinol, a modulator of auxin signaling.	cytosol		cytosol:21166475
AT5G21160	LA RNA-binding protein;	nucleus		plasma membrane:21433285
AT5G21326	Ca2+regulated serine-threonine protein kinase family protein;	cytosol	cytosol:23162070;extracellular:23162070	cytosol:21166475;golgi:25900983;golgi:25900983;golgi:25900983;golgi:25900983;vacuole:25900983
AT5G21990	Tetratricopeptide repeat (TPR)-like superfamily protein;	cytosol		cytosol:21166475;golgi:25900983;plasma membrane:19334764;plasma membrane:21433285;plasma membrane:26781341
AT5G22030	ubiquitin-specific protease 8;	nucleus		cytoskeleton:24134884
AT5G22060	DNAJ homologue 2;Co-chaperonin similar to E. coli DnaJ	cytosol	peroxisome:10737809	cytosol:21166475;golgi:25900983;golgi:25900983;golgi:25900983;golgi:25900983;nucleus:23396599;plasma membrane:17317660;plasma membrane:19334764;plasma membrane:22318864;plasma membrane:26781341
AT5G22120	;	nucleus		plasma membrane:19334764
AT5G22320	Leucine-rich repeat (LRR) family protein;	nucleus
AT5G22330	P-loop containing nucleoside triphosphate hydrolases superfamily protein;	nucleus		cytosol:21166475;golgi:25900983;golgi:25900983;nucleus:15496452;nucleus:24012629;nucleus:23396599;plastid:15028209
AT5G22480	ZPR1 zinc-finger domain protein;	cytosol		cytosol:21166475;golgi:25900983;golgi:25900983
AT5G22650	histone deacetylase 2B;Encodes a member of a plant-specific class of histone deacetylases. Controls the development of adaxial/abaxial leaf polarity. Its mRNA is widely expressed in stems, leaves, flowers and young siliques. Plant lines expressing RNAi constructs directed against this gene showed a marked reduction in agrobacterium-mediated root transformation.	nucleus	nucleus:15144374	cytoskeleton:24134884;cytosol:18433157;extracellular:26572690;golgi:25900983;golgi:25900983;golgi:25900983;golgi:25900983;golgi:25900983;mitochondrion:22923678;nucleus:15496452;nucleus:27177187;nucleus:23396599;plasma membrane:19334764;plasma membrane:22318864;vacuole:17151019
AT5G22780	Adaptor protein complex AP-2, alpha subunit;	plasma membrane		golgi:25900983;golgi:25900983;golgi:25900983;golgi:25900983;golgi:25900983;plasma membrane:15574830;plasma membrane:17644812;plasma membrane:22215637;plasma membrane:26781341
AT5G22880	histone B2;Encodes a histone 2B (H2B) protein. This protein can be ubiquitinated in planta, and this modification depends on the HUB1 and HUB2 E3 ubiquitin ligases.	nucleus	nucleus:11251092;nucleus:16463096	extracellular:26572690;golgi:25900983;golgi:25900983;golgi:25900983;golgi:25900983;golgi:25900983;nucleus:15496452;nucleus:23396599;plasma membrane:22318864
AT5G22950	SNF7 family protein;	cytosol		vacuole:23903016
AT5G23540	Mov34/MPN/PAD-1 family protein;	cytosol,nucleus		cytosol:14623899;cytosol:21166475;extracellular:26572690;golgi:25900983;golgi:25900983;golgi:25900983;golgi:25900983;golgi:25900983;plasma membrane:19334764;plasma membrane:22215637;plasma membrane:22318864;plasma membrane:26781341;vacuole:25900983
AT5G23570	XS domain-containing protein / XS zinc finger domain-containing protein-related;Required for posttranscriptional gene silencing and natural virus resistance.SGS3 is a member of an 'unknown' protein family. Members of this family have predicted coiled coiled domains suggesting oligomerization and a potential zinc finger domain. Involved in the production of trans-acting siRNAs, through direct or i…	nucleus		cytoskeleton:24134884;cytosol:21166475
AT5G23860	tubulin beta 8;beta-tubulin, preferentially expressed in endodermal and phloem cells of primary roots and in the vascular tissues of leaves, stems, and flowers.	cytosol		cytoskeleton:24134884;golgi:22430844;golgi:25900983;golgi:25900983;golgi:25900983;golgi:25900983;golgi:25900983;nucleus:14505352;plasma membrane:22215637;plasma membrane:26781341;vacuole:25900983
AT5G24400	NagB/RpiA/CoA transferase-like superfamily protein;Encodes a protein with 6-phosphoglucunolactonase activity that localizes to the chloroplasts and the peroxisome. However, mutant phenotypes observed in pgl3 mutant plants can be complemented with a chloroplast-targeted version of the protein. PGL3 likely functions in the oxidative branch of the pentose phosphate pathway. pgl3 mutant phenotypes su…	peroxisome,plastid	peroxisome:17951448;plastid:17951448	extracellular:26572690;plastid:20423899;plastid:21531424;plastid:18431481;plastid:18633119;plastid:20061580;plastid:24361574
AT5G24710	Transducin/WD40 repeat-like superfamily protein;	plasma membrane,nucleus	cytosol:24134884	cytoskeleton:24134884;golgi:25900983;golgi:25900983;golgi:25900983;golgi:25900983;nucleus:23396599;plasma membrane:17317660;plasma membrane:21433285;plasma membrane:26781341
AT5G24750	UDP-Glycosyltransferase superfamily protein;	plasma membrane
AT5G24840	tRNA (guanine-N-7) methyltransferase;	cytosol,nucleus
AT5G25070	;	nucleus		cytoskeleton:24134884;cytosol:21166475;plastid:23667806;vacuole:23903016
AT5G25100	Endomembrane protein 70 protein family;	golgi	golgi:22570441	golgi:16618929;golgi:22430844;golgi:22923678;golgi:25900983;golgi:25122472;golgi:25900983;golgi:25900983;golgi:25900983;golgi:25900983;mitochondrion:27943495;plasma membrane:17317660;plasma membrane:19334764;plasma membrane:21433285
AT5G25757	RNA polymerase I-associated factor PAF67;	cytosol		plasma membrane:19334764
AT5G25780	eukaryotic translation initiation factor 3B-2;member of eIF3b - eukaryotic initiation factor 3b	cytosol		cytosol:18433157;cytosol:20374526;cytosol:21166475;nucleus:18433157;nucleus:23396599;plasma membrane:21433285;vacuole:18686298
AT5G26360	TCP-1/cpn60 chaperonin family protein;	cytosol		cytosol:21166475;extracellular:26572690;golgi:25900983;golgi:25900983;golgi:25900983;golgi:25900983;golgi:25900983;mitochondrion:27122571;nucleus:23396599;plasma membrane:25641898;plasma membrane:19334764;plasma membrane:21433285;vacuole:23903016;vacuole:25900983
AT5G26710	Glutamyl/glutaminyl-tRNA synthetase, class Ic;	cytosol		cytoskeleton:24134884;cytosol:21166475;cytosol:22522809;extracellular:15157177;nucleus:23396599;plasma membrane:19334764;plasma membrane:21433285
AT5G26830	Threonyl-tRNA synthetase;Encodes a dual-targeted threonyl-tRNA synthetase found in both the chloroplast and mitochondrion.	mitochondrion,plastid	cytosol:10583378;mitochondrion:10583378;mitochondrion:12837943	cytosol:21166475;mitochondrion:27943495;plasma membrane:17317660;plasma membrane:21433285;plasma membrane:26781341;plastid:25402197
AT5G27640	translation initiation factor 3B1;encodes a member of eukaryotic translation initiation factor 3B family.	cytosol		cytosol:18433157;cytosol:21166475;golgi:25900983;golgi:25900983;golgi:25900983;golgi:25900983;golgi:25900983;nucleus:18433157;nucleus:23396599;plasma membrane:19334764;plasma membrane:26781341;vacuole:25900983
AT5G28540	heat shock protein 70 (Hsp 70) family protein;Encodes the luminal binding protein BiP, an ER-localized member of the HSP70 family. BiP is composed of an N-terminal ATP binding domain and a C-terminal domain that binds to hydrophobic patches on improperly/incompletely folded proteins in an ATP-dependent manner. Involved in polar nuclei fusion during proliferation of endosperm nuclei.	endoplasmic reticulum	endoplasmic reticulum:18931141;endoplasmic reticulum:23624714	cytosol:21166475;cytosol:22522809;endoplasmic reticulum:22923678;extracellular:15157177;golgi:22430844;golgi:25900983;golgi:25900983;golgi:25900983;golgi:25900983;golgi:25900983;mitochondrion:27943495;nucleus:14505352;nucleus:23396599;plasma membrane:17317660;plasma membrane:19334764;plasma membrane:21433285;plasma membrane:26781341;plastid:15028209;plastid:20061580;plastid:20061580;plastid:24361…
AT5G28840	GDP-D-mannose 3',5'-epimerase;Encodes a protein with GDP-D-mannose 3',5'-epimerase activity. The enzyme is involved in ascorbate biosynthesis. It catalyzes the conversion of GDP-D-mannose to GDP-L-galactose.	cytosol		cytosol:21166475;plasma membrane:25641898;plasma membrane:26781341;plastid:24361574
AT5G30510	ribosomal protein S1;	plastid		golgi:25900983;golgi:25900983;golgi:25900983;golgi:25900983;golgi:25900983;mitochondrion:27122571;nucleus:23396599;plasma membrane:19334764;plastid:15028209;plastid:16648217;plastid:20423899;plastid:21531424;plastid:23549413;plastid:23851315;plastid:18431481;plastid:18633119;plastid:20061580;plastid:21539947;plastid:24361574;plastid:24872594;vacuole:23903016;vacuole:25900983
AT5G35430	Tetratricopeptide repeat (TPR)-like superfamily protein;	golgi		golgi:25900983;golgi:25900983;golgi:25900983;plasma membrane:19334764;vacuole:25900983
AT5G35620	Eukaryotic initiation factor 4E protein;Cap-binding protein, binds to the 5' cap structure of nuclear-encoded mRNAs. Mutant is resistant to potyvirus infection.	cytosol	cytosol:15610358;nucleus:15610358	cytoskeleton:24134884;cytosol:21166475;golgi:25900983;nucleus:24012629;plastid:24361574
AT5G36230	ARM repeat superfamily protein;	cytosol		cytosol:21166475;golgi:25900983;golgi:25900983;golgi:25900983;golgi:25900983;golgi:25900983;nucleus:14505352;vacuole:25900983
AT5G36880	acetyl-CoA synthetase;Encodes a plastidic acetyl-coA synthetase. This enzyme plays a role in converting acetate to acetyl-coA in the plastids. It does not appear to be a major contributor to fatty acid biosynthesis based on mutant phenotypes. The enzyme seems to act as a monomer and may play an important role in preventing the toxic accumulation of fermentation products including acetaldehyde, ac…	plastid		peroxisome:14581625;plasma membrane:22318864;plastid:15028209;plastid:16207701;plastid:20423899;plastid:21531424;plastid:18431481;plastid:20061580;plastid:24361574
AT5G37475	Translation initiation factor eIF3 subunit;	cytosol		cytosol:21166475
AT5G37850	pfkB-like carbohydrate kinase family protein;Encodes a pyridoxal kinase required for root hair development. Mutants are hypersensitive to Na+, K+ and Li+.	plastid		cytosol:21166475
AT5G38830	Cysteinyl-tRNA synthetase, class Ia family protein;	cytosol		cytosol:21166475
AT5G39720	avirulence induced gene 2 like protein;	cytosol
AT5G40490	RNA-binding (RRM/RBD/RNP motifs) family protein;	nucleus		cytosol:21166475;golgi:25900983
AT5G40760	glucose-6-phosphate dehydrogenase 6;Encodes a cytosolic glucose-6-phosphate dehydrogenase that is insensitive to reduction by DTT and whose mRNA is expressed ubiquitously.	cytosol		cytosol:21166475;extracellular:26572690
AT5G40870	uridine kinase/uracil phosphoribosyltransferase 1;Encodes a protein that appears to possess both uridine kinase and uracil phosphoribosyltransferase activities.	plastid	plastid:21828290	cytosol:21166475
AT5G41080	PLC-like phosphodiesterases superfamily protein;	cytosol
AT5G41950	Tetratricopeptide repeat (TPR)-like superfamily protein;	golgi	golgi:26941089	cytosol:21166475;golgi:25900983;golgi:25900983;golgi:25900983;golgi:25900983;golgi:25900983;plasma membrane:21433285;vacuole:25900983
AT5G42020	Heat shock protein 70 (Hsp 70) family protein;Luminal binding protein (BiP2) involved in polar nuclei fusion during proliferation of endosperm nuclei.	endoplasmic reticulum	endoplasmic reticulum:11226186;endoplasmic reticulum:18931141	cytosol:25587034;cytosol:22522809;endoplasmic reticulum:16618929;endoplasmic reticulum:22923678;extracellular:26572690;golgi:25900983;golgi:25900983;golgi:25900983;golgi:25900983;golgi:25900983;mitochondrion:21472856;nucleus:14505352;nucleus:14617066;nucleus:15496452;nucleus:23396599;plasma membrane:25641898;plasma membrane:17317660;plasma membrane:19334764;plasma membrane:21433285;plasma membran…
AT5G42080	dynamin-like protein;Encodes a dynamin-like protein related to phragmoplastin. Mutations in this gene, in combination with mutation in ADL1E, result in defects in embryogenesis, cell plate formation and trichome branching. Also controls vascular patterning in combination with VAN3 and GNOM. DRP2B and DRP1A participate together in clathrin-coated vesicle formation during endocytosis.	plasma membrane	cytoskeleton:14750520;cytosol:18612642;plasma membrane:12671086;plasma membrane:20231465;plastid:9463364	cytoskeleton:24134884;cytosol:21166475;golgi:25900983;golgi:25900983;golgi:25900983;golgi:25900983;golgi:25900983;nucleus:24012629;nucleus:23396599;plasma membrane:25641898;plasma membrane:16618929;plasma membrane:17317660;plasma membrane:19334764;plasma membrane:21433285;plasma membrane:22215637;plasma membrane:22318864;plasma membrane:22923678;plasma membrane:26781341;vacuole:15539469;vacuole:1…
AT5G42270	FtsH extracellular protease family;VAR1 contains a conserved motif for ATPase and a metalloprotease characteristic to FtsH proteins, and is targeted into chloroplasts. A VAR1-fusion protein synthesized in vitro exhibited ATPase activity and partial metalloprotease activity. This protein is located to the thylakoid membrane and forms a complex with VAR2. FtsH1 (VAR1) and FtsH5 are interchangeable …	plastid		golgi:25900983;golgi:25900983;mitochondrion:27943495;plasma membrane:19334764;plasma membrane:21433285;plastid:12938931;plastid:14729914;plastid:15028209;plastid:15322131;plastid:21531424;plastid:23851315;plastid:20061580;plastid:23390424;plastid:24872594;plastid:24361574;plastid:18431481;plastid:18633119;plastid:20061580;plastid:23667806;plastid:24872594;plastid:25402197
AT5G42820	Zinc finger C-x8-C-x5-C-x3-H type family protein;U2 auxiliary factor small subunit. The atU2AF35b protein and its homolog, atU2AF35a, contain most of the conserved domains of hsU2AF35, including the psiRRM, one RS domain, two zinc fingers, and the two regions for interacting with U2AF large subunit. Both proteins lack the stretch of glycines present in human U2AF35. The sequences are overall 83% …	nucleus
AT5G42970	Proteasome component (PCI) domain protein;encodes subunit 4 of COP9 signalosome complex. sequence is similar to a subunit of the 19S regulatory particle of the 26S proteasome. recessive mutation causes derepression of photomorphogenesis.	nucleus		cytosol:21166475
AT5G43010	regulatory particle triple-A ATPase 4A;26S proteasome AAA-ATPase subunit RPT4a (RPT4a) mRNA,	cytosol,nucleus		cytosol:21166475;golgi:25900983;golgi:25900983;golgi:25900983;golgi:25900983;golgi:25900983;mitochondrion:21841088;mitochondrion:27943495;nucleus:27177187;vacuole:25900983
AT5G43780	Pseudouridine synthase/archaeosine transglycosylase-like family protein;sulfate adenylyltransferase, ATP sulfurylase	plastid	plastid:10806350	golgi:25900983;golgi:25900983;golgi:25900983;golgi:25900983;mitochondrion:14671022;plastid:18431481;plastid:20423899;plastid:21531424;plastid:20061580;plastid:24361574;plastid:24872594
AT5G43900	myosin 2;Encodes a member of the type XI myosin protein family that binds F-actin and co-localizes with actin filaments and peroxisomes. Homozygous mutants are reported to have pleiotropic effects in growth and fertility and may also be lethal. This protein is also involved in root hair growth and organelle trafficking. This protein interacts with RabC2a and RabD1 in a GTP-dependent manner.	peroxisome,cytosol	cytoskeleton:18598361;cytosol:19369591;nucleus:18598361;peroxisome:15792961;peroxisome:17288617;peroxisome:17500056;plasma membrane:24187546;unclear:19369591	golgi:25900983;golgi:25900983;golgi:25900983;golgi:25900983;golgi:25900983
AT5G43960	Nuclear transport factor 2 (NTF2) family protein with RNA binding (RRM-RBD-RNP motifs) domain;	nucleus		plasma membrane:25641898;plasma membrane:21433285;plasma membrane:26781341
AT5G44070	phytochelatin synthase 1 (PCS1);Phytochelatin synthase gene confers tolerance to cadmium ions. Catalyzes phytochelatin (PC) synthesis from glutathione (GSH) in the presence of Cd2+, Zn2+, Cu2+ and Fe3+, but not by Co2+ or Ni2+.	cytosol	cytosol:20304971	cytosol:21166475;extracellular:26572690;mitochondrion:27943495;plasma membrane:15574830;plasma membrane:22215637;plasma membrane:26781341
AT5G44090	Calcium-binding EF-hand family protein;	cytosol		cytosol:22522809;mitochondrion:14671022;plasma membrane:19334764
AT5G44170	S-adenosyl-L-methionine-dependent methyltransferases superfamily protein;	cytosol
AT5G44320	Eukaryotic translation initiation factor 3 subunit 7 (eIF-3);	cytosol		cytosol:21166475
AT5G45620	Proteasome component (PCI) domain protein;	cytosol,nucleus		cytosol:14623896;cytosol:21166475;golgi:25900983;golgi:25900983;nucleus:27177187
AT5G45750	RAB GTPase homolog A1C;	cytosol	cytosol:22974509	cytosol:21166475;golgi:25900983;golgi:25900983;golgi:25900983;golgi:25900983;golgi:21826108;golgi:25900983;nucleus:14617066;plasma membrane:25641898;plasma membrane:17317660;plasma membrane:17644812;plasma membrane:22215637;plasma membrane:26781341;vacuole:14760709;vacuole:23903016;vacuole:25900983
AT5G46630	Clathrin adaptor complexes medium subunit family protein;clathrin adaptor complexes medium subunit family protein, contains Pfam profile: PF00928 adaptor complexes medium subunit family; similar to micro-adaptins of clathrin coated vesicle adaptor complexes	plasma membrane	cytosol:23975897;plasma membrane:23843604;plasma membrane:23975897	cytosol:21166475;golgi:25900983;golgi:25900983;golgi:25900983;golgi:25900983;golgi:25900983;mitochondrion:27122571;plasma membrane:25641898;plasma membrane:17317660;plasma membrane:19334764;plasma membrane:26781341;vacuole:25900983
AT5G46750	ARF-GAP domain 9;A member of ARF GAP domain (AGD), A thaliana has 15 members, grouped into four classes.	golgi	golgi:23266962	golgi:25900983;golgi:25900983
AT5G47200	RAB GTPase homolog 1A;	golgi,endoplasmic reticulum	golgi:21826108	golgi:25900983;golgi:25900983;golgi:25900983;golgi:25900983;golgi:25900983;plasma membrane:25641898;plasma membrane:15060130;plasma membrane:19334764;plasma membrane:22215637;plasma membrane:26781341;plastid:24361574;vacuole:25900983
AT5G47770	farnesyl diphosphate synthase 1;Encodes a protein with farnesyl diphosphate synthase activity.	cytosol		cytosol:21166475;extracellular:26572690;mitochondrion:27943495;plasma membrane:19334764
AT5G47840	adenosine monophosphate kinase;	plastid		cytoskeleton:24134884;plastid:16207701;plastid:20423899;plastid:21531424;plastid:18431481;plastid:18633119;plastid:20061580;plastid:24361574;plastid:24872594
AT5G47880	eukaryotic release factor 1-1;Encodes a eukaryotic release factor 1 homolog. Cosuppression of the gene's expression results affects cell elongation of the inflorescence stem, specifically the internodes, and radial cell division. Expression of the protein is primarily observed in the vascular system and in actively growing and elongating zones.	cytosol		golgi:25900983
AT5G48180	nitrile specifier protein 5;Encodes a nitrile-specifier protein NSP5. NSP5 is one out of five (At3g16400/NSP1, At2g33070/NSP2, At3g16390/NSP3, At3g16410/NSP4 and At5g48180/NSP5) A. thaliana epithiospecifier protein (ESP) homologues that promote simple nitrile, but not epithionitrile or thiocyanate formation.	cytosol		cytosol:21166475;cytosol:28611809;mitochondrion:27122571
AT5G48810	cytochrome B5 isoform D;Encodes a cytochrome b5 isoform that localizes to the ER. The C-terminal portion of the protein appears to be capable of inserting into a plant microsomal membrane in vitro and the protein appears to be subject to glycosylation.	endoplasmic reticulum	endoplasmic reticulum:17322552	endoplasmic reticulum:16618929;golgi:25900983;golgi:25900983;golgi:25900983;golgi:25900983;golgi:25900983;plasma membrane:25641898;plasma membrane:19334764;plasma membrane:22215637;plasma membrane:26781341;vacuole:25900983
AT5G48930	hydroxycinnamoyl-CoA shikimate/quinate hydroxycinnamoyl transferase;At5g48930 has been shown to encode for the hydroxycinnamoyl-Coenzyme A shikimate/quinate hydroxycinnamoyltransferase (HCT) both synthesizing and catabolizing the hydroxycinnamoylesters (coumaroyl/caffeoyl shikimate and quinate) involved in the phenylpropanoid pathway. Influence on the accumulation of flavonoids which in turn inhi…	cytosol		cytosol:21166475
AT5G49020	protein arginine methyltransferase 4A;Encodes a type I protein arginine methyltransferase. PRMT4a can catalyze the asymmetric dimethylation of arginines 2,17, and 26 on histone 3 and can also methylate myelin basic protein in vitro. Double mutants lacking PRMT4a and 4b have reduced levels of histone 3 methylated at R17. These double mutants flower late due to defects in the autonomous pathway and…	plastid
AT5G49460	ATP citrate lyase subunit B 2;One of the two genes encoding subunit B of the cytosolic enzyme ATP Citrate Lyase (ACL)	cytosol		cytoskeleton:24134884;plasma membrane:15574830;plasma membrane:17317660
AT5G49720	glycosyl hydrolase 9A1;Encodes a membrane-bound endo-1,4-beta-D-glucanase, involved in cellulose biosynthesis. Loss-of-function mutants have severe cellulose-deficient phenotypes. During cell elongation, KOR1 is associated with Golgi apparatus and early endosome. Inhibition of cellulose biosynthesis promoted a redistribution of KOR1 in subcellular locations. These observations suggest that deposi…	golgi,cytosol,plasma membrane	cytosol:10899980;endoplasmic reticulum:16284310;plasma membrane:10899980;vacuole:16284310	golgi:22430844;golgi:22923678;golgi:25900983;golgi:25900983;golgi:25900983;golgi:21826108;golgi:25900983;mitochondrion:27122571;plasma membrane:25641898;plasma membrane:14506206;plasma membrane:15308754;plasma membrane:17317660;plasma membrane:19334764;plasma membrane:20843791;plasma membrane:21433285;plasma membrane:26748395;plasma membrane:26781341;vacuole:25900983
AT5G49830	exocyst complex component 84B;Encodes a member of the exocyst complex gene family. The exocyst is a protein complex involved in tethering vesicles to the plasma membrane during regulated or polarized secretion.	plasma membrane	cytosol:20870962;cytosol:20870962;plasma membrane:20870962;plasma membrane:23283982	golgi:25900983;golgi:25900983;golgi:25900983;golgi:25900983;golgi:25900983;plasma membrane:17317660;plasma membrane:17644812;plasma membrane:19334764;plasma membrane:21433285;plasma membrane:22215637;plasma membrane:26781341;vacuole:18686298;vacuole:25900983
AT5G49910	chloroplast heat shock protein 70-2;Stromal heat shock protein involved in protein import into chloroplast.	plastid		golgi:25900983;golgi:25900983;golgi:25900983;golgi:25900983;golgi:25900983;mitochondrion:23444301;nucleus:23396599;plasma membrane:19334764;plasma membrane:21433285;plastid:12938931;plastid:15028209;plastid:16207701;plastid:16648217;plastid:20423899;plastid:21531424;plastid:23851315;plastid:18431481;plastid:18433418;plastid:18633119;plastid:20061580;plastid:21539947;plastid:23549413;plastid:24361…
AT5G49930	zinc knuckle (CCHC-type) family protein;	nucleus		cytoskeleton:24134884
AT5G50250	chloroplast RNA-binding protein 31B;Encodes a RNA binding protein. A substrate of the type III effector HopU1 (mono-ADP-ribosyltransferase). Supports editing of specific CP31A-dependent sites.	plastid		plastid:12938931;plastid:20423899;plastid:21531424;plastid:26987276;plastid:18431481;plastid:18633119;plastid:20061580;plastid:21539947;plastid:24361574
AT5G50460	secE/sec61-gamma protein transport protein;	cytosol
AT5G50680	SUMO activating enzyme 1B;Encodes a protein that is part of a heterodimeric SUMO E1 activating enzyme.	cytosol
AT5G50870	ubiquitin-conjugating enzyme 27;	cytosol		cytosol:21166475
AT5G50960	nucleotide binding protein 35;Highly similar to Saccharomyces cerevisiae NBP35, locus YGL091C. Cytosolic protein that homodimerizes and can assemble both 4Fe-4S - type and 2Fe-2S - type clusters on its amino terminal and carboxy therminal respectively. Null mutants are embryo lethal.	cytosol
AT5G51430	conserved oligomeric Golgi complex component-related / COG complex component-related;Encodes a protein that is homologous to Cog7, a subunit of the conserved oligomeric Golgi (COG) complex, which is required for the normal morphology and function of the Golgi apparatus. It is likely to be involved in transport or retention of Golgi-localized proteins and in maintenance of Golgi morphology.	golgi		cytosol:21166475;golgi:25900983;golgi:25900983;golgi:25900983;golgi:25900983;plasma membrane:19334764;vacuole:25900983
AT5G51480	SKU5 similar 2;	plasma membrane		plasma membrane:14517339;plasma membrane:16602701;plasma membrane:17317660;plasma membrane:17644812;plasma membrane:20843791;plasma membrane:21433285;plasma membrane:22318864;plasma membrane:26091700;plasma membrane:26748395
AT5G51550	EXORDIUM like 3;	extracellular		extracellular:16287169;extracellular:26572690
AT5G51840	;	nucleus
AT5G52240	membrane steroid binding protein 1;Encodes a protein with similarity to progesterone-binding proteins in animals. Has been shown to bind steroids in vitro. Expressed in aerial portions of the plant excluding mature flowers and siliques. Antisense experiments suggest a role in inhibition of hypocotyl cell elongation. Expression is suppressed light grown seedlings transferred to the dark.	endoplasmic reticulum		endoplasmic reticulum:16618929;endoplasmic reticulum:22923678;golgi:22430844;golgi:25900983;golgi:25900983;golgi:25900983;golgi:25900983;golgi:25900983;plasma membrane:25641898;plasma membrane:17317660;plasma membrane:17644812;plasma membrane:19334764;plasma membrane:22215637;plasma membrane:26781341;vacuole:25900983
AT5G52560	UDP-sugar pyrophosphorylase;Encodes a protein with UTP:sugar 1-phosphate uridylyltransferase activity, which has been shown to use a wide range of substrates including glucose-1-P, galactose-1-P, xylose-1-P, arabinose-1-P and glucuronate-1-P. The enzyme was shown to require Mg2+ or Mn2+ for activity. Mutations in USP can lead to a complete loss of male fertility.	cytosol		cytoskeleton:24134884;cytosol:21166475
AT5G52920	plastidic pyruvate kinase beta subunit 1;encodes a dominant chloroplast pyruvate kinase beta subunit. Important for seed oil biosynthesis. Ubiquitously expressed, with significantly increased expression in maturing seeds. The mutant plant has wrinkled seeds, with a 50-70% reduction in seed fatty acid content.	plastid	plastid:17892448	extracellular:26572690;golgi:25900983;golgi:25900983;plasma membrane:19334764;plastid:16207701;plastid:20423899;plastid:21531424;plastid:18431481;plastid:20061580;plastid:24361574;plastid:24872594
AT5G53000	2A phosphatase associated protein of 46 kD;PP2A-associated protein with a possible function in the chilling response	cytosol		cytosol:21166475;vacuole:23903016
AT5G53300	ubiquitin-conjugating enzyme 10;Encodes a ubiquitin conjugating enzyme.	golgi		golgi:25900983;golgi:25900983;golgi:25900983;golgi:25900983
AT5G53400	HSP20-like chaperones superfamily protein;Encodes BOBBER1 (BOB1), a non-canonical small heat shock protein required for both development and thermotolerance. BOB1 is cytoplasmic at basal temperatures but forms heat shock granules containing canonical small heat shock proteins at high temperatures.	cytosol	cytosol:19648297	cytosol:21166475;extracellular:26572690
AT5G53480	ARM repeat superfamily protein;	cytosol,plastid,nucleus		golgi:25900983;golgi:25900983;golgi:25900983;golgi:25900983;golgi:25900983;nucleus:23396599;plasma membrane:19334764;plasma membrane:22215637;plasma membrane:26781341;plastid:15028209;vacuole:25900983
AT5G53530	vacuolar protein sorting 26A;Homolog of yeast retromer subunit VPS26. Part of a retromer-like protein complex involved in endosome to lysosome protein transport.	golgi		extracellular:26572690;golgi:25900983;golgi:25900983;plasma membrane:25641898;vacuole:25900983
AT5G53620	;	nucleus		cytosol:21166475
AT5G54310	ARF-GAP domain 5;A member of ARF GAP domain (AGD), A thaliana has 15 members, grouped into four classes. Regulates membrane trafficking and organ separation.	nucleus		cytosol:18433157
AT5G54440	CLUB;Encodes a putative TRAPPII tethering factor required for cell plate assembly during cytokinesis.	golgi		golgi:25900983;golgi:25900983;golgi:25900983;vacuole:25900983
AT5G54510	Auxin-responsive GH3 family protein;Encodes an IAA-amido synthase that conjugates Ala, Asp, Phe, and Trp to auxin. Lines overexpressing this gene accumulate IAA-ASP and are hypersensitive to several auxins. Identified as a dominant mutation that displays shorter hypocotyls in light grown plants when compared to wild type siblings. Protein is similar to auxin inducible gene from pea (GH3).	cytosol		plastid:15028209
AT5G54760	Translation initiation factor SUI1 family protein;	cytosol
AT5G54900	RNA-binding protein 45A;	nucleus		cytosol:21166475;plasma membrane:25641898
AT5G54960	pyruvate decarboxylase-2;pyruvate decarboxylase-2	cytosol		cytosol:21166475;mitochondrion:27122571;nucleus:23396599;plasma membrane:19334764;plasma membrane:21433285;vacuole:23903016
AT5G55130	co-factor for nitrate, reductase and xanthine dehydrogenase 5;putative molybdopterin synthase sulphurylase (cnx5)	cytosol
AT5G55230	microtubule-associated proteins 65-1;Binds and bundles microtubules. Plays a role in stabilizing anti-parallel microtubules in the central spindle at anaphase to early cytokinesis but is not essential at the midline of the phragmoplast at later stages. The timing with which the MAP65-1 was targeted to the spindle appears to be regulated by a phosphorylation sensitive switch. Enhances microtubule …	cytosol	cytoskeleton:15469496;cytoskeleton:16098102;cytoskeleton:21551389;cytoskeleton:15557096;cytoskeleton:17674780;cytoskeleton:18318686;cytoskeleton:18667529;cytosol:16098102	cytoskeleton:24134884;cytosol:21166475;plasma membrane:22215637;plasma membrane:26781341
AT5G55280	homolog of bacterial cytokinesis Z-ring protein FTSZ 1-1;Encodes one of two FtsZ proteins, tubulin-like proteins, in Arabidopsis. It is involved in chloroplast division.	plastid	plastid:11285278;plastid:19403522;plastid:26500667	golgi:25900983;golgi:25900983;golgi:25900983;golgi:25900983;plastid:20423899;plastid:21531424;plastid:23390424;plastid:18431481;plastid:18633119;plastid:20061580;plastid:24361574;plastid:24872594
AT5G55480	SHV3-like 1;Glycerophosphoryl diester phosphodiesterase-like protein involved in cell wall cellulose accumulation and pectin linking. Impacts root hair, trichome and epidermal cell development.	plasma membrane		extracellular:16356755;extracellular:26572690;extracellular:28155257;plasma membrane:25641898;plasma membrane:12805588;plasma membrane:14506206;plasma membrane:14517339;plasma membrane:16602701;plasma membrane:16618929;plasma membrane:17317660;plasma membrane:17644812;plasma membrane:19334764;plasma membrane:20843791;plasma membrane:21433285;plasma membrane:22215637;plasma membrane:22318864;plasm…
AT5G55530	Calcium-dependent lipid-binding (CaLB domain) family protein;	nucleus
AT5G55940	Uncharacterised protein family (UPF0172);	endoplasmic reticulum		endoplasmic reticulum:16618929;endoplasmic reticulum:22923678;golgi:25900983;golgi:25900983;plasma membrane:19334764
AT5G56000	HEAT SHOCK PROTEIN 81.4;	cytosol		cytosol:18433157;golgi:22430844;mitochondrion:19688752;nucleus:18433157;nucleus:23396599;plasma membrane:17317660;plastid:21531424;plastid:20061580;vacuole:17151019
AT5G56010	heat shock protein 81-3;A member of heat shock protein 90 (HSP90) gene family. Expressed in all tissues and abundant in root apical meristem, pollen and tapetum. Expression is NOT heat-induced but induced by IAA and NaCl. Overexpression reduced tolerance to heat and conferred higher tolerance to calcium.	cytosol		cytosol:18433157;golgi:22430844;golgi:25900983;golgi:25900983;golgi:25900983;golgi:25900983;golgi:25900983;mitochondrion:19688752;nucleus:15496452;nucleus:18433157;nucleus:23396599;plasma membrane:25641898;plasma membrane:17644812;plasma membrane:26781341;vacuole:25900983
AT5G56030	heat shock protein 81-2;A member of heat shock protein 90 (HSP90) gene family. Expressed in all tissues and abundant in root apical meristem, pollen and tapetum. Expression is NOT heat-induced but induced by IAA and NaCl. Interacts with HsfA1d in the cytosol and the nucleus and negatively regulates HsfA1d. Did not bind to AtHsfA4c.	cytosol,nucleus		cytosol:18433157;cytosol:21166475;golgi:22430844;golgi:25900983;golgi:25900983;golgi:25900983;golgi:25900983;golgi:25900983;mitochondrion:17137349;mitochondrion:19688752;mitochondrion:27943495;nucleus:18433157;nucleus:23396599;peroxisome:19329564;plasma membrane:19334764;plasma membrane:21433285;plasma membrane:22215637;plasma membrane:26781341;plastid:24361574;vacuole:23903016;vacuole:25900983
AT5G56280	COP9 signalosome subunit 6A;one of two genes encoding subunit 6 of COP9 signalosome complex. Protein contains a MPR1p and PAD1p N-terminal (MPN) domain at the N-terminal region and belongs to the Mov34 superfamily. Mutant and antisense expression result in a number of developmental defects and in ubiquitin/proteasome-mediated protein degradation.	plastid		golgi:25900983
AT5G56360	calmodulin-binding protein;Encodes PSL4, beat-subunit of endoplasmic reticulum-resident glucosidase II, which is essential for stable accumulation and quality control of the elf18 receptor EFR but not the flg22 receptor FLS2.	endoplasmic reticulum		endoplasmic reticulum:22923678;plasma membrane:19334764;plasma membrane:21433285
AT5G56680	Class II aminoacyl-tRNA and biotin synthetases superfamily protein;Encodes a putative cytosolic asparaginyl-tRNA synthetase.	cytosol		cytosol:21166475;extracellular:26572690;plasma membrane:21433285;plasma membrane:26781341
AT5G56740	histone acetyltransferase of the GNAT family 2;Encodes an enzyme with histone acetyltransferase activity. Histone H4 is the primary substrate for the enzyme. Prior acetylation of lysine 12 of histone H4 reduces radioactive acetylation by HAG2. HAG2 acetylates histone H4 lysine 12.	nucleus		cytosol:21166475
AT5G56950	nucleosome assembly protein 1;3;Encodes a member of a small gene family of proteins with similarity to nucleosome assembly proteins.May function in nucleotide excision repair. Loss of function mutations have no obvious visible phenotypes but do seem to affect transcription of NER related genes.	nucleus		cytosol:21166475;extracellular:26572690;nucleus:23396599;plasma membrane:22215637
AT5G57020	myristoyl-CoA:protein N-myristoyltransferase;Arabidopsis thaliana myristoyl-CoA:protein N-myristoyltransferase.	cytosol		cytosol:21166475;extracellular:26572690;plasma membrane:19334764
AT5G57410	Afadin/alpha-actinin-binding protein;	cytosol	cytoskeleton:24134884	cytoskeleton:24134884
AT5G57440	Haloacid dehalogenase-like hydrolase (HAD) superfamily protein;a member of haloacid dehalogenase-like hydrolase family	mitochondrion		mitochondrion:14671022
AT5G57655	xylose isomerase family protein;	endoplasmic reticulum		endoplasmic reticulum:16618929;endoplasmic reticulum:22923678;extracellular:26572690;mitochondrion:27943495;plasma membrane:25641898;plasma membrane:22215637;vacuole:17151019
AT5G57870	MIF4G domain-containing protein / MA3 domain-containing protein;Encodes a putative eukaryotic translation initiation factor.	cytosol,nucleus	unclear:15610358	cytoskeleton:24134884;cytosol:21166475;extracellular:26572690;golgi:25900983;golgi:25900983;golgi:25900983;golgi:25900983;plasma membrane:19334764;plasma membrane:21433285;plasma membrane:22215637;plasma membrane:26781341
AT5G57890	Glutamine amidotransferase type 1 family protein;	plastid
AT5G57950	26S proteasome regulatory subunit, putative;	cytosol,nucleus		plastid:23851315
AT5G58060	SNARE-like superfamily protein;member of YKT6 Gene Family	golgi	unclear:15342965	cytosol:21166475;golgi:22430844;golgi:25900983;golgi:25900983;golgi:25900983;golgi:25900983;plasma membrane:19334764;plasma membrane:22215637;plasma membrane:22318864;vacuole:25900983
AT5G58290	regulatory particle triple-A ATPase 3;26S proteasome AAA-ATPase subunit RPT3 (RPT3) mRNA,	cytosol,nucleus		cytosol:21166475;golgi:25900983;golgi:25900983;golgi:25900983;golgi:25900983;golgi:25900983;mitochondrion:27943495;nucleus:27177187;plasma membrane:19334764;plasma membrane:22318864;plasma membrane:26781341;vacuole:25900983
AT5G58440	sorting nexin 2A;	golgi	golgi:19796370	cytosol:21166475;extracellular:28003327;golgi:25900983;golgi:25900983;golgi:25900983
AT5G58490	NAD(P)-binding Rossmann-fold superfamily protein;	cytosol		cytosol:21166475;golgi:25900983;golgi:25900983
AT5G58590	RAN binding protein 1;Encodes a Ran-binding protein 1 homolog (RanBP1).	nucleus
AT5G58710	rotamase CYP 7;Encodes cyclophilin ROC7.	endoplasmic reticulum		endoplasmic reticulum:22923678;plasma membrane:15574830;plasma membrane:22215637;plasma membrane:26781341
AT5G59140	BTB/POZ domain-containing protein;	cytosol		cytosol:21166475
AT5G59420	OSBP(oxysterol binding protein)-related protein 3C;	cytosol		cytosol:21166475;plasma membrane:22215637
AT5G59840	Ras-related small GTP-binding family protein;	golgi		golgi:25900983;golgi:25900983;golgi:25900983;golgi:25900983;golgi:25900983;plasma membrane:15060130;plasma membrane:22318864;plasma membrane:26781341;plastid:24872594
AT5G59880	actin depolymerizing factor 3;Encodes actin depolymerizing factor 3 (ADF3).	cytosol		cytosol:21166475;extracellular:26572690;mitochondrion:12492832;mitochondrion:14671022;plasma membrane:17644812;plasma membrane:19334764;plasma membrane:22215637;plasma membrane:26781341;plastid:24361574
AT5G59890	actin depolymerizing factor 4;actin depolymerizing factor 4 (ADF4) mRNA, complete cds	cytosol		plasma membrane:25641898
AT5G59950	RNA-binding (RRM/RBD/RNP motifs) family protein;	nucleus		cytoskeleton:24134884;extracellular:26572690;peroxisome:19329564
AT5G59970	Histone superfamily protein;	nucleus		mitochondrion:24727099;mitochondrion:27943495
AT5G60360	aleurain-like protease;Encodes a senescence-associated thiol protease.	vacuole	vacuole:12724533;vacuole:15722471;vacuole:16230331	extracellular:18998720;extracellular:26572690;vacuole:15539469
AT5G60390	GTP binding Elongation factor Tu family protein;	cytosol	cytosol:15610358;cytosol:in house;nucleus:15610358	cytosol:22522809;mitochondrion:14671022;mitochondrion:21296373;mitochondrion:24727099;plasma membrane:14506206;plasma membrane:22215637;plasma membrane:22318864
AT5G60460	Preprotein translocase Sec, Sec61-beta subunit protein;	golgi		golgi:22430844;golgi:25900983;golgi:25900983;golgi:25900983;golgi:25900983;golgi:25900983;plasma membrane:17317660;plasma membrane:22215637
AT5G60540	pyridoxine biosynthesis 2;Encodes a protein predicted to function in tandem with PDX1 to form glutamine amidotransferase complex with involved in vitamin B6 biosynthesis. PDX2 is predicted to function as glutaminase within the complex.	cytosol	cytosol:16157873;cytosol:17344055;nucleus:17344055;plasma membrane:17344055	golgi:25900983;golgi:25900983
AT5G60640	PDI-like 1-4;Encodes a protein disulfide isomerase-like (PDIL) protein, a member of a multigene family within the thioredoxin (TRX) superfamily. Unlike several other PDI family members, transcript levels for this gene are not up-regulated in response to three different chemical inducers of ER stress (dithiothreitol, beta-mercaptoethanol, and tunicamycin). However, the level of transcripts for thi…	endoplasmic reticulum	endoplasmic reticulum:18931141	endoplasmic reticulum:16618929;endoplasmic reticulum:22923678;extracellular:26572690;mitochondrion:12492832;mitochondrion:14671022;mitochondrion:27943495;plasma membrane:25641898;plasma membrane:19334764;plasma membrane:21433285;plasma membrane:22215637;plasma membrane:26781341;plastid:15028209;vacuole:17151019
AT5G60790	ABC transporter family protein;member of GCN subfamily	cytosol		golgi:25900983;golgi:25900983;plasma membrane:25641898;plasma membrane:17317660;plasma membrane:19334764;plasma membrane:21433285
AT5G60980	Nuclear transport factor 2 (NTF2) family protein with RNA binding (RRM-RBD-RNP motifs) domain;	nucleus		cytoskeleton:24134884;extracellular:26572690;golgi:25900983;golgi:25900983;plasma membrane:21433285;plasma membrane:22215637;plasma membrane:26781341;plastid:24361574
AT5G61500	autophagy 3 (APG3);	cytosol		cytosol:21166475
AT5G61780	TUDOR-SN protein 2;Involved in the regulation of AtGA20ox3 expression, as well as seed germination.	nucleus		cytosol:18433157;cytosol:20374526;cytosol:21166475;extracellular:26572690;golgi:25900983;golgi:25900983;golgi:25900983;golgi:25900983;golgi:25900983;nucleus:18433157;plasma membrane:21433285;plasma membrane:22215637;plasma membrane:26781341;vacuole:25900983
AT5G61790	calnexin 1;	endoplasmic reticulum	endoplasmic reticulum:18931141;endoplasmic reticulum:26680228	endoplasmic reticulum:15295017;endoplasmic reticulum:16618929;endoplasmic reticulum:22923678;extracellular:16287169;golgi:25900983;golgi:25900983;golgi:25900983;golgi:25900983;golgi:25900983;mitochondrion:14671022;mitochondrion:15276431;mitochondrion:27943495;plasma membrane:25641898;plasma membrane:17317660;plasma membrane:19334764;plasma membrane:20374526;plasma membrane:21433285;plasma membran…
AT5G61970	signal recognition particle-related / SRP-related;	nucleus		cytosol:21166475;mitochondrion:27122571;nucleus:23396599;plasma membrane:19334764;plasma membrane:26781341
AT5G62700	tubulin beta chain 3;encodes tubulin beta-2/beta-3 chain	cytosol		golgi:22430844;mitochondrion:27943495;plastid:24872594
AT5G63220	;	cytosol
AT5G64260	EXORDIUM like 2;	extracellular		cytoskeleton:24134884;cytosol:21166475;extracellular:16287169;extracellular:16356755;extracellular:16729891;extracellular:21109274;extracellular:26572690;extracellular:28155257;golgi:22430844;plasma membrane:21433285
AT5G64270	splicing factor, putative;	nucleus		cytoskeleton:24134884;golgi:25900983;golgi:25900983;golgi:25900983;golgi:25900983;nucleus:27177187;nucleus:23396599;plasma membrane:19334764;plasma membrane:21433285;plastid:15028209
AT5G64350	FK506-binding protein 12;	cytosol		cytosol:21166475
AT5G64430	Octicosapeptide/Phox/Bem1p family protein;	nucleus		plasma membrane:19334764;plastid:12938931
AT5G64460	Phosphoglycerate mutase family protein;	cytosol		cytosol:21166475;mitochondrion:27122571
AT5G65010	asparagine synthetase 2;Encodes asparagine synthetase (ASN2).	golgi		cytosol:21166475;golgi:25900983;golgi:25900983;golgi:25900983;golgi:25900983;golgi:25900983;plasma membrane:26781341;vacuole:25900983
AT5G65020	annexin 2;Annexins are calcium binding proteins that are localized in the cytoplasm. When cytosolic Ca2+ increases, they relocate to the plasma membrane. They may be involved in the Golgi-mediated secretion of polysaccharides.	cytosol,plasma membrane		extracellular:26572690;mitochondrion:27122571;plasma membrane:25641898;plasma membrane:19334764;plasma membrane:22215637;plasma membrane:22318864;plasma membrane:26781341;plastid:14729914;vacuole:23903016
AT5G65270	RAB GTPase homolog A4A;	golgi		golgi:25900983;golgi:25900983;golgi:25900983;golgi:25900983;golgi:21826108;golgi:25900983;plasma membrane:16618929;plasma membrane:17317660;plasma membrane:19334764;plasma membrane:22923678;plasma membrane:26781341;vacuole:25900983
AT5G65620	Zincin-like metalloproteases family protein;	plastid	mitochondrion:24043784;plastid:24043784	extracellular:26572690;golgi:25900983;mitochondrion:27122571;mitochondrion:27943495;plasma membrane:21433285;plasma membrane:22215637;plastid:16207701;plastid:20423899;plastid:21531424;plastid:23851315;plastid:18431481;plastid:18433418;plastid:18633119;plastid:20061580;plastid:24361574
AT5G66680	dolichyl-diphosphooligosaccharide-protein glycosyltransferase 48kDa subunit family protein;Encodes a protein ortholog of human SOT48 or yeast WBP1, an essential protein subunit of the oligosaccharyltransferase (OST) complex, which is responsible for the transfer in the ER of the N-linked glycan precursor onto Asn residues of candidate proteins.	endoplasmic reticulum		endoplasmic reticulum:16618929;endoplasmic reticulum:22923678;extracellular:16287169;golgi:22430844;golgi:25900983;golgi:25900983;golgi:25900983;golgi:25900983;golgi:25900983;nucleus:15496452;nucleus:23396599;plasma membrane:25641898;plasma membrane:15574830;plasma membrane:19334764;plasma membrane:21433285;plasma membrane:22215637;plasma membrane:26781341;vacuole:17151019;vacuole:25900983
AT5G67220	FMN-linked oxidoreductases superfamily protein;	mitochondrion
AT5G67630	P-loop containing nucleoside triphosphate hydrolases superfamily protein;	nucleus		cytoskeleton:24134884;golgi:25900983;golgi:25900983;golgi:25900983;nucleus:15496452;nucleus:27177187;nucleus:23396599;plastid:15028209
AT1G09210	calreticulin 1b;Encodes one of three Arabidopsis calreticulins.	endoplasmic reticulum	endoplasmic reticulum:18931141	endoplasmic reticulum:16618929;endoplasmic reticulum:22923678;endoplasmic reticulum:24393051;extracellular:26572690;mitochondrion:12492832;mitochondrion:14671022;plasma membrane:15574830;plasma membrane:21433285;plasma membrane:22215637;plasma membrane:26781341;plastid:24361574
AT1G64090	Reticulan like protein B3;	endoplasmic reticulum	cytosol:26084919;endoplasmic reticulum:26084919	cytosol:20374526;endoplasmic reticulum:16618929;endoplasmic reticulum:22923678;plasma membrane:25641898;plasma membrane:19334764;plasma membrane:23990937;plasma membrane:26781341
AT3G22960	Pyruvate kinase family protein;encodes a chloroplast pyruvate kinase alpha subunit. Important for seed oil biosynthesis. Ubiquitously expressed, with significantly increased expression in maturing seeds.	plastid	plastid:17892448	extracellular:26572690;golgi:25900983;golgi:25900983;golgi:25900983;golgi:25900983;golgi:25900983;mitochondrion:27943495;plasma membrane:21433285;plastid:15028209;plastid:16207701;plastid:20423899;plastid:21531424;plastid:23851315;plastid:18431481;plastid:20061580;plastid:24361574;plastid:24872594;vacuole:25900983
AT3G61820	Eukaryotic aspartyl protease family protein;	extracellular		extracellular:16287169;extracellular:16356755;extracellular:16729891;extracellular:26572690;extracellular:28155257;golgi:25900983;golgi:25900983;golgi:25900983;golgi:25900983;plasma membrane:19334764;plasma membrane:20843791;vacuole:25900983
AT1G02130	RAS 5;Belongs to the Rab1 GTPase subfamily. This small GTP-binding protein is required in ER to Golgi transportation.	golgi,endoplasmic reticulum	endoplasmic reticulum:11090219;golgi:11090219	golgi:25900983;golgi:25900983;golgi:25900983;golgi:25900983;golgi:21826108;golgi:25900983;plasma membrane:25641898;plasma membrane:15060130;plasma membrane:26781341;vacuole:15539469;vacuole:23903016;vacuole:25900983
AT1G02150	Tetratricopeptide repeat (TPR)-like superfamily protein;	plastid		golgi:25900983;golgi:25900983;golgi:25900983;golgi:25900983;plastid:18431481;plastid:21531424;plastid:23851315;plastid:20061580;plastid:23549413;plastid:24872594;vacuole:25900983
AT1G04270	cytosolic ribosomal protein S15;Encodes cytosolic ribosomal protein S15.	cytosol		cytosol:21166475;cytosol:15734919;cytosol:15821981;extracellular:26572690;golgi:25900983;golgi:25900983;golgi:25900983;golgi:25900983;golgi:25900983;mitochondrion:21841088;nucleus:23396599;plasma membrane:17317660;plasma membrane:19334764;plasma membrane:22215637;plasma membrane:22318864;plasma membrane:26781341;plastid:20061580;vacuole:17151019;vacuole:23903016;vacuole:25900983
AT1G08450	calreticulin 3;Encodes one of three Arabidopsis calreticulins. In CRT-deficient mouse fibroblasts, this protein restores ER Ca2+ levels. Non-receptor component required for EFR-mediated immunity. Mutants show de-repressed anthocyanin accumulation in the presence of elf18, and EFR accumulation and signalling.	endoplasmic reticulum	endoplasmic reticulum:18931141	endoplasmic reticulum:22923678;endoplasmic reticulum:24393051;extracellular:16356755;mitochondrion:27122571;nucleus:23396599;plasma membrane:15574830;plasma membrane:22215637;plasma membrane:26781341
AT1G09870	histidine acid phosphatase family protein;	extracellular		endoplasmic reticulum:22923678;extracellular:15694452;extracellular:16356755;plasma membrane:19334764;plasma membrane:22215637;vacuole:17151019
AT1G16300	glyceraldehyde-3-phosphate dehydrogenase of plastid 2;Encodes one of the chloroplast/plastid localized GAPDH isoforms (GAPCp1/At1g79530 and GAPCp2/At1g16300). gapcp double mutants display a drastic phenotype of arrested root development, dwarfism and sterility. GAPCps are important for the synthesis of serine in roots.	plastid		mitochondrion:27122571
AT1G25350	glutamine-tRNA ligase, putative / glutaminyl-tRNA synthetase, putative / GlnRS, putative;	cytosol		cytosol:21166475;mitochondrion:27122571
AT1G48410	Stabilizer of iron transporter SufD / Polynucleotidyl transferase;Encodes an RNA Slicer that selectively recruits microRNAs and siRNAs. There is currently no evidence that AGO1 Slicer is in a high molecular weight RNA-induced silencing complex (RISC). Mutants are defective in post-transcriptional gene silencing and have pleiotropic developmental and morphological defects. Through its action on th…	nucleus		cytoskeleton:24134884;cytosol:18433157;extracellular:26572690;nucleus:18433157;plasma membrane:19334764
AT1G51540	Galactose oxidase/kelch repeat superfamily protein;	golgi		golgi:16618929;golgi:22923678
AT1G58080	ATP phosphoribosyl transferase 1;ATP phosphoribosyl transferase, catalyses first step of histidine biosynthesis	plastid		extracellular:26572690;golgi:25900983;plastid:18431481;plastid:21531424;plastid:20061580;plastid:24361574;vacuole:25900983
AT1G59600	ZCW7;	nucleus		extracellular:26572690
AT1G59870	ABC-2 and Plant PDR ABC-type transporter family protein;ATP binding cassette transporter. Localized to the plasma membrane in uninfected cells. In infected leaves, the protein concentrated at infection sites. Contributes to nonhost resistance to inappropriate pathogens that enter by direct penetration in a salicylic acid–dependent manner. Required for mlo resistance. Has Cd transporter activity (…	plasma membrane	plasma membrane:16473969;plasma membrane:28434950	golgi:25900983;golgi:25900983;golgi:25900983;golgi:25900983;golgi:21826108;golgi:25900983;mitochondrion:15276431;plasma membrane:25641898;plasma membrane:14506206;plasma membrane:15308754;plasma membrane:15574830;plasma membrane:16618929;plasma membrane:16635983;plasma membrane:17317660;plasma membrane:17644812;plasma membrane:19334764;plasma membrane:21433285;plasma membrane:22215637;plasma memb…
AT1G68560	alpha-xylosidase 1;Encodes a bifunctional alpha-l-arabinofuranosidase/beta-d-xylosidase that belongs to family 3 of glycoside hydrolases.	extracellular		extracellular:15593128;extracellular:16287169;extracellular:16356755;extracellular:16729891;extracellular:19825673;extracellular:21109274;extracellular:26572690;extracellular:28155257;extracellular:24393051;extracellular:25852701;golgi:25900983;golgi:25900983;golgi:25900983;golgi:25900983;golgi:25900983;plasma membrane:19334764;plasma membrane:20843791;plasma membrane:21433285;plasma membrane:223…
AT1G75950	S phase kinase-associated protein 1;SKP1 is core component of the SCF family of E3 ubiquitin ligases and serves to tether the rest of the complex to an F-box protein, which provides specificity in binding to ubiquitin ligase substrate proteins. Predominately expressed from leptotene to pachytene. Negatively regulates recombination. Interacts with P0, a silencing suppressor protein encoded by pole…	cytosol	cytosol:16283376;cytosol:23226441;nucleus:16283376;nucleus:16333572;nucleus:23226441	cytoskeleton:24134884;cytosol:21166475;extracellular:26572690;plasma membrane:17317660
AT1G78060	Glycosyl hydrolase family protein;	extracellular		extracellular:15593128;extracellular:16287169;extracellular:16356755;extracellular:26572690;extracellular:28155257;plasma membrane:19334764;plastid:18431481
AT1G78830	Curculin-like (mannose-binding) lectin family protein;	extracellular		extracellular:14595688;extracellular:15593128;extracellular:16287169;extracellular:16356755;extracellular:16729891;extracellular:21109274;extracellular:24393051;extracellular:26572690;extracellular:28155257;extracellular:25852701;golgi:22430844;golgi:25900983;mitochondrion:27122571;plasma membrane:17317660;plasma membrane:20843791;plasma membrane:22318864
AT2G16640	multimeric translocon complex in the outer envelope membrane 132;	nucleus		mitochondrion:21896887;plasma membrane:19334764;plasma membrane:21433285;plastid:22923678;plastid:20061580;unclear:16618929
AT2G36160	Ribosomal protein S11 family protein;	cytosol		cytosol:17934214;cytosol:21166475;cytosol:15734919;cytosol:22522809;extracellular:26572690;golgi:25900983;golgi:25900983;golgi:25900983;golgi:25900983;golgi:25900983;nucleus:23396599;plasma membrane:25641898;plasma membrane:17317660;plasma membrane:19334764;plasma membrane:22318864;plasma membrane:26781341;plastid:15028209;plastid:24872594;plastid:20061580;vacuole:17151019;vacuole:23903016;vacuol…
AT2G44610	Ras-related small GTP-binding family protein;Encodes a GTP-binding protein with similarity to yeast YPT6 . RAB6 can complement the yeast YTP mutant.	golgi	cytosol:19454595;golgi:19454595	cytosol:21166475;extracellular:26572690;golgi:22923678;golgi:25900983;golgi:25122472;golgi:25900983;golgi:25900983;golgi:25900983;golgi:21826108;golgi:25900983;mitochondrion:27943495;plasma membrane:25641898;plasma membrane:17644812;plasma membrane:19334764;plasma membrane:22215637;plasma membrane:26781341;plastid:20061580;vacuole:17151019;vacuole:25900983
AT3G11250	Ribosomal protein L10 family protein;	cytosol		cytosol:15734919;cytosol:15821981;cytosol:22522809;extracellular:26572690;plasma membrane:19334764;vacuole:18686298
AT3G20320	trigalactosyldiacylglycerol2;Encodes a permease-like component of an ABC transporter involved in lipid transfer from ER to chloroplast. A phosphatidic acid-binding protein with a predicted mycobacterial cell entry domain. It is tethered to the inner chloroplast envelope membrane facing the outer envelope membrane. Presumed bacterial orthologs of TGD1 and TGD2 in Gram-negative bacteria are typical…	plastid		cytosol:28611809;golgi:25900983;plasma membrane:25641898;plasma membrane:19334764;plastid:12766230;plastid:12938931;plastid:21531424;plastid:22923678;plastid:18431481;plastid:20061580;plastid:24872594
AT3G25680	;	plastid		plasma membrane:21433285;plastid:18431481;plastid:21531424;plastid:22923678;plastid:20061580;plastid:24872594
AT3G42050	vacuolar ATP synthase subunit H family protein;	vacuole,golgi		extracellular:26572690;golgi:22430844;golgi:25900983;golgi:25900983;golgi:25900983;golgi:25900983;golgi:21826108;golgi:25900983;nucleus:27177187;plasma membrane:25641898;plasma membrane:15574830;plasma membrane:17317660;plasma membrane:17644812;plasma membrane:19334764;plasma membrane:20843791;plasma membrane:22215637;plasma membrane:23323832;plastid:18431481;plastid:20061580;vacuole:14760709;vac…
AT3G44310	nitrilase 1;Mutants are resistant to indole-3-acetonitrile (IAN). NIT1 catalyzes the terminal activation step in indole-acetic acid biosynthesis. Predominantly expressed isoform of nitrilase isoenzyme family. Aggregation of NIT1 in cells directly abutting wound sites is one of the earliest events associated with wound and herbicide-induced cell death. The protein undergoes thiolation following tr…	cytosol	cytoskeleton:23437871;cytosol:15796778;nucleus:15796778;nucleus:23437871	cytosol:21166475;cytosol:25587034;extracellular:26572690;golgi:25900983;golgi:25900983;golgi:25900983;golgi:25900983;golgi:25900983;mitochondrion:27122571;nucleus:23396599;plasma membrane:25641898;plasma membrane:15574830;plasma membrane:17317660;plasma membrane:19334764;plasma membrane:22215637;plasma membrane:26781341;plastid:18431481;plastid:20423899;plastid:24361574
AT3G45960	expansin-like A3;member of EXPANSIN-LIKE. Naming convention from the Expansin Working Group (Kende et al, 2004. Plant Mol Bio)	extracellular		cytosol:21166475;extracellular:16287169;extracellular:16356755;extracellular:16729891;extracellular:26572690
AT3G45970	expansin-like A1;member of EXPANSIN-LIKE. Naming convention from the Expansin Working Group (Kende et al, 2004. Plant Mol Bio)	extracellular		cytoskeleton:24134884;extracellular:14595688;extracellular:16287169;extracellular:16356755;extracellular:16729891;extracellular:18998720;extracellular:21109274;extracellular:25805245;extracellular:26572690;extracellular:28155257;extracellular:28003327;golgi:22430844;plasma membrane:21433285
AT3G52640	Zn-dependent exopeptidases superfamily protein;	vacuole		endoplasmic reticulum:22923678;vacuole:15215502;vacuole:17151019;vacuole:23903016
AT3G53890	Ribosomal protein S21e ;	cytosol		cytosol:15734919;extracellular:26572690
AT3G55760	;	plastid		nucleus:23396599;plastid:15028209;plastid:16207701;plastid:18431481;plastid:20061580;plastid:24361574
AT3G58730	vacuolar ATP synthase subunit D (VATD) / V-ATPase D subunit / vacuolar proton pump D subunit (VATPD);	vacuole,golgi		extracellular:26572690;golgi:22430844;golgi:25900983;golgi:25900983;golgi:25900983;golgi:25900983;golgi:21826108;golgi:25900983;mitochondrion:27943495;plasma membrane:25641898;plasma membrane:15574830;plasma membrane:17644812;plasma membrane:19334764;plasma membrane:20843791;plasma membrane:22215637;plasma membrane:26781341;plastid:20061580;vacuole:15215502;vacuole:15539469;vacuole:16618929;vacuo…
AT3G62720	xylosyltransferase 1;Encodes a protein with xylosyltransferase activity, which is specific for UDP-xylose as donor substrate and for oligosaccharides with a degree of polymerization >4. Although the enzyme utilizes either cellopentaose or cellohexaose, its activity is four-fold higher with cellohexaose as an acceptor compared to cellopentaose. The enzyme is able to add several xylosyl residues to…	golgi	golgi:21143678	golgi:22430844;golgi:22923678;golgi:25122472
AT4G12420	Cupredoxin superfamily protein;Encodes a protein of unknown function involved in directed root tip growth. It is a member of 19-member gene family and is distantly related structurally to the multiple-copper oxidases ascorbate oxidase and laccase, though it lacks the copper-binding domains. The protein is glycosylated and GPI-anchored. It is localized to the plasma membrane and the cell wall. The…	plasma membrane	extracellular:12119380;plasma membrane:12119380	extracellular:14595688;extracellular:16356755;extracellular:24393051;extracellular:26572690;extracellular:28155257;extracellular:28003327;golgi:25900983;golgi:25900983;golgi:25900983;golgi:25900983;golgi:25900983;plasma membrane:25641898;plasma membrane:12805588;plasma membrane:14517339;plasma membrane:15060130;plasma membrane:15308754;plasma membrane:15574830;plasma membrane:16602701;plasma memb…
AT4G25530	FLOWERING WAGENINGEN;Encodes a homeodomain-containing transcription factor that controls flowering. FWA is silenced in wild type plants and reverse of the imprinted silencing causes a late flowering phenotype. FWA gene contains two tandem repeats around the transcription start site that are necessary and sufficient for silencing via DNA methylation.	nucleus
AT4G34660	SH3 domain-containing protein;	cytosol	cytosol:24249832	cytosol:21166475;golgi:25900983;golgi:25900983;plasma membrane:26781341
AT4G35860	GTP-binding 2;GTP-binding protein ATGB2	golgi		extracellular:26572690;golgi:25900983;golgi:25900983;golgi:25900983;golgi:25900983;golgi:21826108;golgi:25900983;mitochondrion:21896887;plasma membrane:22215637;plasma membrane:22318864;plasma membrane:26781341;plastid:18431481
AT5G16590	Leucine-rich repeat protein kinase family protein;	plasma membrane		extracellular:16287169;extracellular:21109274;golgi:25900983;mitochondrion:27122571;plasma membrane:25641898;plasma membrane:14506206;plasma membrane:15308754;plasma membrane:16635983;plasma membrane:17317660;plasma membrane:17644812;plasma membrane:19334764;plasma membrane:20843791;plasma membrane:21433285;plasma membrane:22215637;plasma membrane:22318864;plasma membrane:23990937;plasma membrane…
AT5G16660	;	plastid		plasma membrane:19334764;plastid:12938931;plastid:14729914;plastid:21531424;plastid:22923678;plastid:18431481;plastid:20061580
AT5G25460	Protein of unknown function, DUF642;	extracellular		extracellular:16287169;extracellular:16356755;extracellular:16729891;extracellular:21109274;extracellular:24393051;extracellular:26572690;extracellular:28155257;extracellular:25852701;golgi:25900983;golgi:25900983;golgi:25900983;golgi:25900983;golgi:25900983;nucleus:27177187;plasma membrane:21433285;vacuole:25900983
AT5G26570	catalytics;carbohydrate kinases;phosphoglucan, water dikinases;chloroplastidic phosphoglucan, water dikinase (PWD) which is required for normal degradation of leaf starch in Arabidopsis. NMR analysis of the mutants, suggests that the gene is specifically involved in the phosphorylation of the glucosyl residues of starch at the C3 position.	plastid		golgi:25900983;golgi:25900983;golgi:25900983;golgi:25900983;nucleus:23396599;plasma membrane:19334764;plasma membrane:21433285;plastid:15028209;plastid:16207701;plastid:21531424;plastid:18431481;plastid:18633119;plastid:20061580;plastid:24361574;plastid:24872594
AT5G26667	P-loop containing nucleoside triphosphate hydrolases superfamily protein;encodes a uridine 5'-monophosphate (UMP)/cytidine 5'-monophosphate (CMP) kinase.	cytosol		cytosol:21166475;extracellular:26572690;golgi:25900983;golgi:25900983;plasma membrane:22215637
AT5G44130	FASCICLIN-like arabinogalactan protein 13 precursor;	extracellular,plasma membrane		extracellular:16287169;extracellular:28155257;golgi:22430844;plasma membrane:25641898;plasma membrane:14506206;plasma membrane:14517339;plasma membrane:16602701;plasma membrane:16635983;plasma membrane:17317660;plasma membrane:17644812;plasma membrane:20843791;plasma membrane:21433285;plasma membrane:22215637;plasma membrane:22318864;plasma membrane:26781341
AT5G44720	Molybdenum cofactor sulfurase family protein;	cytosol		extracellular:26572690
AT5G47010	RNA helicase, putative;Required for nonsense-mediated mRNA decay. Involved in RNA interference. lba1 mutants has reduced sugar-induced expression of Atb- amylase, is hypersensitive to glucose and abscisic acid and resistant to mannose, and shows early flowering, short day-sensitive growth, and seed germination phenotypes.	cytosol		cytoskeleton:24134884;golgi:25900983;plasma membrane:17317660;plasma membrane:19334764;plasma membrane:21433285
AT5G48580	FK506- and rapamycin-binding protein 15 kD-2;immunophilin (FKBP15-2)	endoplasmic reticulum		cytosol:21166475;endoplasmic reticulum:22923678;extracellular:26572690;golgi:22430844;plasma membrane:22215637;plasma membrane:26781341
AT5G50920	CLPC homologue 1;Encodes a protein that is similar to ATP-dependent Clp protease ATP-binding subunit / ClpC. Involved in protein import into the chloroplast. May provide ATP source that drives the TIC (Translocon at the Inner envelope membrane of Chloroplasts) translocation machinery.	plastid		golgi:25900983;golgi:25900983;golgi:25900983;golgi:25900983;golgi:25900983;mitochondrion:14671022;mitochondrion:27943495;nucleus:27177187;plasma membrane:25641898;plasma membrane:21433285;plastid:12766230;plastid:12938931;plastid:15028209;plastid:15322131;plastid:16207701;plastid:20423899;plastid:21531424;plastid:22923678;plastid:23549413;plastid:23851315;plastid:26987276;plastid:18431481;plastid…
AT5G56650	IAA-leucine resistant (ILR)-like 1;encodes a protein similar to IAA conjugate hydrolases. Enzyme assays with purified GST-tagged protein shows some activity in vitro but too low to be physiologically significant.	endoplasmic reticulum		golgi:22430844;plastid:24872594
AT5G62390	BCL-2-associated athanogene 7;A member of Arabidopsis BAG (Bcl-2-associated athanogene) proteins, plant homologs of mammalian regulators of apoptosis. Plant BAG proteins are multi-functional and remarkably similar to their animal counterparts, as they regulate apoptotic-like processes ranging from pathogen attack, to abiotic stress, to plant development. Localized to the ER. Necessary for the pro…	endoplasmic reticulum		endoplasmic reticulum:16618929;endoplasmic reticulum:22923678;golgi:25900983;golgi:25900983;golgi:25900983;golgi:25900983;plasma membrane:25641898;plasma membrane:15574830;plasma membrane:17317660;plasma membrane:17644812;plasma membrane:19334764;plasma membrane:21433285;plasma membrane:22215637;plasma membrane:26781341;vacuole:25900983
AT5G63840	Glycosyl hydrolases family 31 protein;radial swelling mutant shown to be specifically impaired in cellulose production. Encodes the alpha-subunit of a glucosidase II enzyme.	endoplasmic reticulum	endoplasmic reticulum:in house	endoplasmic reticulum:16618929;endoplasmic reticulum:22923678;mitochondrion:27122571;plasma membrane:21433285;plasma membrane:26781341;plastid:15028209
AT1G01290	cofactor of nitrate reductase and xanthine dehydrogenase 3;COFACTOR OF NITRATE REDUCTASE AND XANTHINE DEHYDROGENASE 3. Encodes a protein involved in molybdenum cofactor biosynthesis. Homologous to E.coli MoaC. Expression is low in all tissues examined, except in roots. Appears to have targeting signals for chloroplast or mitochondria	mitochondrion		mitochondrion:27943495
AT1G01710	Acyl-CoA thioesterase family protein;	peroxisome		mitochondrion:27943495;peroxisome:17951448;peroxisome:18931141;peroxisome:19329564;peroxisome:24130194
AT1G01820	peroxin 11c;member of the peroxin11 (PEX11) gene family, integral to peroxisome membrane, controls peroxisome proliferation.	peroxisome	peroxisome:16636080	golgi:25900983;mitochondrion:24727099;peroxisome:18931141;peroxisome:19329564;plasma membrane:19334764
AT1G02840	RNA-binding (RRM/RBD/RNP motifs) family protein;SR1 is a plant homologue of the human general/alternative splicing factor SF2/ASF.	nucleus	nucleus:15133128;nucleus:15686520	nucleus:24832081
AT1G04710	peroxisomal 3-ketoacyl-CoA thiolase 4;EC2.3.1.16 thiolase.	peroxisome	peroxisome:17120136	cytoskeleton:24134884;peroxisome:17951448;peroxisome:18931141;peroxisome:19329564;peroxisome:24130194
AT1G05270	TraB family protein;	mitochondrion		mitochondrion:21841088;mitochondrion:27943495;mitochondrion:21896887;plasma membrane:19334764
AT1G06220	Ribosomal protein S5/Elongation factor G/III/V family protein;Encodes a protein with similarity to splicing factor Snu114. Snu114 is thought to be involved in activation of the splicosome. Loss of GFA1 function results in reduced female fertility. Approximately 50% of ovules abort due to defects in the female gametophyte. In mutant gametophytes antipodal cells express egg cell markers suggesting …	nucleus		golgi:25900983;golgi:25900983;golgi:25900983;nucleus:24832081;nucleus:27177187;nucleus:23396599;plasma membrane:17317660;plasma membrane:21433285
AT1G06760	winged-helix DNA-binding transcription factor family protein;	nucleus		extracellular:26572690
AT1G07830	ribosomal protein L29 family protein;	mitochondrion		extracellular:26572690;mitochondrion:21841088;mitochondrion:27943495
AT1G08130	DNA ligase 1;Encodes the Arabidopsis DNA ligase 1 that provides the major DNA ligase activity in cells and plays a key role in both DNA replication and excision repair pathways. Indispensable for cell viability. AtLIG1 expresses one major and two minor mRNA transcripts differing only in the length of the 5' untranslated leader sequences preceding a common ORF. Translation from the first in-frame …	mitochondrion,nucleus	mitochondrion:15270689;mitochondrion:16790030;mitochondrion:23257241;nucleus:15270689;nucleus:16790030;plastid:23257241	mitochondrion:21296373;mitochondrion:27943495
AT1G09300	Metallopeptidase M24 family protein;	mitochondrion		mitochondrion:27943495
AT1G09760	U2 small nuclear ribonucleoprotein A;	nucleus	cytosol:15133128;nucleus:15133128	cytoskeleton:24134884;cytosol:21166475;extracellular:26572690;nucleus:14617066;nucleus:15496452;nucleus:27177187;nucleus:23396599;plastid:15028209
AT1G09770	cell division cycle 5;Member of MYB3R- and R2R3- type MYB- encoding genes. Essential for plant innate immunity. Interacts with MOS4 and PRL1.	nucleus		cytoskeleton:24134884;nucleus:23396599;plasma membrane:19334764;plasma membrane:21433285;plastid:15028209
AT1G11260	sugar transporter 1;Encodes a H+/hexose cotransporter.	plasma membrane		golgi:25900983;golgi:25900983;plasma membrane:15060130;plasma membrane:15308754;plasma membrane:15574830;plasma membrane:17317660;plasma membrane:17644812;plasma membrane:17869214;plasma membrane:19334764;plasma membrane:20843791;plasma membrane:22215637;plasma membrane:22318864;plasma membrane:26781341;vacuole:15539469
AT1G11390	Protein kinase superfamily protein;	mitochondrion
AT1G11860	Glycine cleavage T-protein family;	mitochondrion		extracellular:26572690;golgi:25900983;mitochondrion:18385124;mitochondrion:21296373;mitochondrion:21472856;mitochondrion:21841088;mitochondrion:23444301;mitochondrion:24727099;mitochondrion:27122571;mitochondrion:27943495;mitochondrion:23444301;plasma membrane:25641898;plasma membrane:22215637;plastid:12938931;plastid:18431481;plastid:20423899;plastid:21531424;plastid:23851315;plastid:20061580;pl…
AT1G14620	decoy;	mitochondrion	mitochondrion:21908688	mitochondrion:21841088;mitochondrion:27943495
AT1G15220	cytochrome c biogenesis protein family;Encodes a protein with oxidoreductase activity present in the inner membrane of mitochondria. CCMH is postulated to play a central role in mitochondrial cytochrome c maturation, probably as part of a heme lyase complex that also holds activity of reducing apocytochrome c. CCMH interacts with apocytochrome AtCYTc-a and is shown to be present in a 500 kDa-comp…	mitochondrion		mitochondrion:14671022;mitochondrion:27122571;mitochondrion:27943495
AT1G15910	XH/XS domain-containing protein;	nucleus	nucleus:24574485
AT1G16740	Ribosomal protein L20;	mitochondrion		mitochondrion:21841088;mitochondrion:27943495
AT1G18630	glycine-rich RNA-binding protein 6;encodes a glycine-rich RNA binding protein.	mitochondrion		golgi:22923678;mitochondrion:27943495
AT1G19520	pentatricopeptide (PPR) repeat-containing protein;	mitochondrion		mitochondrion:27943495;plasma membrane:21433285
AT1G19880	Regulator of chromosome condensation (RCC1) family protein;	nucleus		nucleus:23396599
AT1G20693	high mobility group B2;Encodes a protein belonging to the subgroup of HMGB (high mobility group B) proteins that have a distinctive DNA-binding motif, the HMG-box domain. The motif confers non-sequence specific interaction with linear DNA and structure-specific binding to distorted DNA sites. The HMGB proteins are involved in the assembly of nucleoprotein complexes. Can be phosphorylated by CK2al…	nucleus	cytosol:20940346;nucleus:20940346	cytosol:18433157;extracellular:26572690;nucleus:18433157
AT1G20960	U5 small nuclear ribonucleoprotein helicase, putative;	nucleus	nucleus:15496452;unclear:15496452	cytosol:21166475;golgi:25900983;golgi:25900983;golgi:25900983;golgi:25900983;nucleus:15496452;nucleus:27177187;nucleus:23396599;plasma membrane:19334764;plasma membrane:21433285
AT1G24610	Rubisco methyltransferase family protein;	mitochondrion		golgi:25900983;mitochondrion:27943495
AT1G25211	F-box family protein;	nucleus
AT1G26460	Tetratricopeptide repeat (TPR)-like superfamily protein;	mitochondrion		golgi:25900983;golgi:25900983;golgi:25900983;golgi:25900983;mitochondrion:14671022;mitochondrion:21841088;mitochondrion:27943495;plasma membrane:21433285
AT1G30680	toprim domain-containing protein;	mitochondrion	mitochondrion:19036033;plastid:19036033	mitochondrion:27943495
AT1G31817	Ribosomal L18p/L5e family protein;	mitochondrion		mitochondrion:27943495
AT1G32490	RNA helicase family protein;Encodes a homolog of the yeast PRP2 protein, one of four related DEAH RNA helicases identified as essential cofactors for RNA splicing.	nucleus
AT1G33680	KH domain-containing protein;	nucleus		cytosol:21166475
AT1G44900	minichromosome maintenance (MCM2/3/5) family protein;Encodes MCM2 (MINICHROMOSOME MAINTENANCE 2), a protein essential to embryo development. Overexpression results in altered root meristem function.	nucleus		cytosol:21166475
AT1G44910	pre-mRNA-processing protein 40A;Binds the carboxyl-terminal domain (CTD) of the largest subunit of RNA polymerase II and functions as a scaffold for RNA processing machineries.	nucleus		cytoskeleton:24134884;cytosol:21166475
AT1G47128	Granulin repeat cysteine protease family protein;cysteine proteinase precursor-like protein/ dehydration stress-responsive gene (RD21)	extracellular	cytosol:24130194	extracellular:14595688;extracellular:15694452;extracellular:16356755;extracellular:16729891;extracellular:26572690;extracellular:28155257;golgi:25900983;golgi:25900983;golgi:25900983;golgi:25900983;golgi:25900983;nucleus:23396599;plasma membrane:19334764;plastid:15028209;vacuole:15215502;vacuole:15539469;vacuole:23903016;vacuole:25900983
AT1G47750	peroxin 11A;member of the peroxin11 (PEX11) gene family, integral to peroxisome membrane, controls peroxisome proliferation.	peroxisome	peroxisome:16636080	peroxisome:18931141;peroxisome:19329564;peroxisome:24130194
AT1G48200	;	mitochondrion		mitochondrion:21841088;mitochondrion:22923678;mitochondrion:27943495
AT1G48520	GLU-ADT subunit B;Encodes Glu-tRNA(Gln) amidotransferase subunit B (from Genbank record AF239836).	plastid		golgi:25900983;golgi:25900983;golgi:25900983;mitochondrion:21841088;mitochondrion:27943495;plastid:16207701;plastid:20423899;plastid:21531424;plastid:18431481;plastid:20061580;plastid:24361574;vacuole:25900983
AT1G48610	AT hook motif-containing protein;	nucleus		golgi:25900983;nucleus:27177187;nucleus:23396599;plasma membrane:19334764
AT1G48850	chorismate synthase, putative / 5-enolpyruvylshikimate-3-phosphate phospholyase, putative;	plastid		nucleus:15496452;plastid:18431481;plastid:21531424;plastid:22923678;plastid:20061580;plastid:24361574
AT1G49670	ARP protein (REF);molecular function has not been defined. Was shown involved in oxidative stress tolerance.	peroxisome	peroxisome:18931141	cytoskeleton:24134884;extracellular:26572690;mitochondrion:14671022;nucleus:23396599;peroxisome:17951448;peroxisome:18931141;peroxisome:19329564;peroxisome:24130194;plasma membrane:21433285;plastid:20423899
AT1G55250	histone mono-ubiquitination 2;Encodes one of two orthologous E3 ubiquitin ligases in Arabidopsis that are involved in monoubiquitination of histone H2B.	nucleus		plastid:23667806
AT1G55900	Haloacid dehalogenase-like hydrolase (HAD) superfamily protein;component of a translocase in the mitochondrial inner membrane	mitochondrion		mitochondrion:14671022;mitochondrion:14730085;mitochondrion:15276431;mitochondrion:22923678;mitochondrion:27943495
AT1G56110	homolog of nucleolar protein NOP56;NOP56-like protein	nucleus	nucleus:15610358	cytoskeleton:24134884;golgi:25900983;golgi:25900983;golgi:25900983;golgi:25900983;golgi:25900983;nucleus:14505352;nucleus:15496452;nucleus:27177187;nucleus:23396599;plasma membrane:19334764;plasma membrane:21433285;plastid:24872594;vacuole:25900983
AT1G57610	Protein of unknown function (DUF607);	mitochondrion		mitochondrion:27943495
AT1G59990	DEA(D/H)-box RNA helicase family protein;	plastid	plastid:23803517	golgi:25900983;golgi:25900983;golgi:25900983;golgi:25900983;mitochondrion:27943495;plastid:18431481;plastid:23549413
AT1G61980	Mitochondrial transcription termination factor family protein;	mitochondrion	mitochondrion:21464319	mitochondrion:14671022;mitochondrion:27943495;nucleus:14617066
AT1G63160	replication factor C 2;	nucleus		cytoskeleton:24134884
AT1G65540	LETM1-like protein;	mitochondrion		mitochondrion:22923678;mitochondrion:27943495;plasma membrane:19334764;plasma membrane:21433285;unclear:16618929
AT1G67120	ATPases;nucleotide binding;ATP binding;nucleoside-triphosphatases;transcription factor binding;	nucleus		golgi:25900983;golgi:25900983;plastid:12938931;plastid:20061580
AT1G68790	little nuclei3;	nucleus	cytosol:23396599;nucleus:23396599;nucleus:23396599	nucleus:15496452;nucleus:27177187
AT1G69210	Uncharacterised protein family UPF0090;	mitochondrion		mitochondrion:27943495
AT1G70580	alanine-2-oxoglutarate aminotransferase 2;Encodes a protein with glyoxylate aminotransferase activity. It can act on a number of different small substrates and amino acids in vitro.	peroxisome		mitochondrion:27943495;nucleus:23396599;peroxisome:12154131;peroxisome:17951448;peroxisome:18931141;peroxisome:19329564;peroxisome:24130194;plastid:18633119;plastid:24361574
AT1G71260	WHIRLY 2;Encodes WHY2, a homolog of the potato p24 protein. It shares the conserved KGKAAL domain, a putative DNA-binding domain, with potato p24 and is localized to mitochondria and not the nucleus. WHY2 is a member of the Whirly family proteins present mainly in the plant kingdom performing various activities related to DNA metabolism. Crystal structure of Solanum tuberosum WHY2, a close homolo…	mitochondrion	mitochondrion:15967440	golgi:25900983;golgi:25900983;golgi:25900983;mitochondrion:27943495
AT1G74260	purine biosynthesis 4;Encodes formylglycinamidine ribonucleotide synthase an enzyme involved in de novo purine biosynthesis. PUR4 is localizes to the chloroplast and mitochondria. Loss of PUR4 function affects male but not female gametophyte development.	mitochondrion,plastid	mitochondrion:18441219;plastid:18441219	mitochondrion:17137349;plastid:15028209;plastid:16207701;plastid:21531424;plastid:18431481;plastid:18633119;plastid:20061580;plastid:24361574
AT1G74560	NAP1-related protein 1;Double nrp1-1 nrp2-1 mutants show arrest of cell cycle progression at G2/M and disordered cellular organization occurred in root tips. Localize in the nucleus and can form homomeric and heteromeric protein complexes with NRP2. Bind histones Histone2A and Histone2B and associate with chromatin in vivo.	cytosol,nucleus	unclear:15610358	cytosol:21166475;extracellular:26572690
AT1G77470	replication factor C subunit 3;Encodes a protein with high homology to the Replication Factor C, Subunit 3 (RFC3) of yeast and other eukaryotes. rfc3 mutants are hypersensitive to salicylic acid and exhibit enhanced induction of PR genes and resistance against virulent oomycete Hyaloperonospora arabidopsidis Noco2. The enhanced pathogen resistance in the mutant is NPR1-independent.	nucleus		cytoskeleton:24134884
AT1G78890	;	mitochondrion
AT1G79280	nuclear pore anchor;Encodes a 237-kDA protein with similarity to vertebrate Tpr, a long coiled-coil proteins of nuclear pore inner basket filaments. It is localized to the inner surface of the nuclear envelope and is a component of the nuclear pore-associated steps of sumoylation and mRNA export in plants. Mutations affect flowering time regulation and other developmental processes. Probably acts…	nucleus	nucleus:21189294	golgi:25900983;golgi:25900983;golgi:25900983;mitochondrion:27943495;nucleus:15496452;nucleus:27177187;plasma membrane:21433285;plastid:15028209
AT1G79730	hydroxyproline-rich glycoprotein family protein;Encodes a PAF1 homolog that is involved in the control of flowering time by elevating FLC expression to a level that creates the vernalization-responsive, winter-annual habit. Yeast PAF1 is a component of a five-member complex that associates with RNA pol II and is thought to regulate gene expression by recruiting SET1 (a histone 3 Lys 4 [H3-K4] met…	nucleus		cytoskeleton:24134884
AT1G80070	Pre-mRNA-processing-splicing factor;a genetic locus involved in embryogenesis. Mutations in this locus result in an abnormal suspensor and embryo lethality.	nucleus		golgi:25900983;golgi:25900983;mitochondrion:27943495;nucleus:27177187;nucleus:23396599;plasma membrane:21433285;plastid:15028209
AT1G80270	PENTATRICOPEPTIDE REPEAT 596;	mitochondrion,plastid	mitochondrion:21908688	mitochondrion:21841088;mitochondrion:27943495;plasma membrane:21433285;plastid:12938931
AT2G02470	alfin-like 6;AL6 encodes a member of the Alfin-Like family of nuclear-localized PhD domain containing homeodomain proteins. Binds to H3K4 di or trimethylated DNA.	nucleus		cytosol:21166475
AT2G07690	Minichromosome maintenance (MCM2/3/5) family protein;Member of the minichromosome maintenance complex, involved in DNA replication initiation. Abundant in proliferating and endocycling tissues. Localized in the nucleus during G1, S and G2 phases of the cell cycle, and are released into the cytoplasmic compartment during mitosis. Binds chromatin.	nucleus
AT2G15690	Tetratricopeptide repeat (TPR)-like superfamily protein;	mitochondrion	mitochondrion:in house;plastid:in house
AT2G16430	purple acid phosphatase 10;	extracellular		extracellular:16287169;extracellular:16356755;extracellular:16729891;extracellular:21109274;extracellular:26572690;extracellular:28155257
AT2G16440	Minichromosome maintenance (MCM2/3/5) family protein;	nucleus		cytosol:21166475
AT2G16485	nucleic acid binding;zinc ion binding;DNA binding;	nucleus		cytosol:21166475
AT2G17510	ribonuclease II family protein;	cytosol
AT2G17670	Tetratricopeptide repeat (TPR)-like superfamily protein;	plastid
AT2G18740	Small nuclear ribonucleoprotein family protein;	nucleus		cytoskeleton:24134884;cytosol:21166475;extracellular:26572690;nucleus:23396599
AT2G19680	Mitochondrial ATP synthase subunit G protein;	mitochondrion		mitochondrion:21472856;mitochondrion:21841088;mitochondrion:22923678;mitochondrion:24727099;mitochondrion:27943495
AT2G19860	hexokinase 2;Encodes a protein with hexokinase activity (AtHXK2) and acts as a sensor for plant sugar responses.	mitochondrion	mitochondrion:23257241	golgi:25900983;mitochondrion:14671022;mitochondrion:21472856;mitochondrion:21841088;mitochondrion:22923678;mitochondrion:24727099;mitochondrion:27943495;mitochondrion:21896887;plasma membrane:19334764;unclear:16618929
AT2G20270	Thioredoxin superfamily protein;	plastid		plastid:16207701;plastid:20423899;plastid:21531424;plastid:18431481;plastid:20061580;plastid:24361574
AT2G20330	Transducin/WD40 repeat-like superfamily protein;	nucleus
AT2G20860	lipoic acid synthase 1;LIP1,Lipoic acid synthase,	mitochondrion		mitochondrion:27943495
AT2G21150	XAP5 family protein;XAP5 family protein involved in light regulation of the circadian clock and photomorphogenesis. Nuclear localized.	nucleus
AT2G21470	SUMO-activating enzyme 2;Encodes one of the two subunits of the SUMO activation enzyme required during sumolation. Sumolation is a post-translational protein modification process similar to ubiquitination during which a polypeptide (SUMO) is covalently attached to a target protein.	nucleus		cytosol:18433157;nucleus:18433157
AT2G25140	casein lytic proteinase B4;Encodes ClpB4, which belongs to the Casein lytic proteinase/heat shock protein 100 (Clp/Hsp100) family. Targeted to the mitochondrion, also referred to as ClpB-m. Transcripts of ClpB4 accumulate dramatically at high temperatures, suggesting that it may be involved in response to heat stress.	mitochondrion		mitochondrion:21841088;mitochondrion:27943495;plastid:15028209;plastid:18431481;plastid:20061580;plastid:20061580;plastid:24361574
AT2G27100	C2H2 zinc-finger protein SERRATE (SE);Identified as a leaf form mutant by Redei having serrated leaves. Further analysis of the single loss of function allele indicated pleiotropic effects extending to many aspects of shoot development such as taller meristems, alterations in phase transition, phyllotaxy and branching. Encodes a single zinc finger containing protein that is expressed in meristems…	nucleus		cytoskeleton:24134884;cytosol:18433157;cytosol:21166475;golgi:25900983;golgi:25900983;golgi:25900983;golgi:25900983;nucleus:15496452;nucleus:18433157;plasma membrane:21433285;plastid:15028209
AT2G27170	Structural maintenance of chromosomes (SMC) family protein;Encodes a member of the Arabidopsis cohesin complex that is essential for viability and sister chromatid alignment.	nucleus		cytoskeleton:24134884;nucleus:23396599
AT2G29540	RNApolymerase 14 kDa subunit;RNA polymerase I(A) and III(C) 14 kDa subunit	nucleus		cytoskeleton:24134884
AT2G30200	catalytics;transferases;[acyl-carrier-protein] S-malonyltransferases;binding;	plastid		golgi:25900983;golgi:25900983;golgi:25900983;mitochondrion:27943495;plastid:16207701;plastid:20423899;plastid:21531424;plastid:18431481;plastid:18633119;plastid:20061580;plastid:24361574
AT2G30620	winged-helix DNA-binding transcription factor family protein;	nucleus	nucleus:15496452;unclear:15496452	extracellular:26572690;golgi:25900983;golgi:25900983;golgi:25900983;golgi:25900983;golgi:25900983;mitochondrion:22923678;nucleus:15496452;nucleus:23396599;plasma membrane:22318864;vacuole:25900983
AT2G30920	coenzyme Q 3;The enzyme encoded by this gene has been shown to complement the Saccharomyces cerevisiae coq3 mutation and, therefore, to have hexaprenyldihydroxybenzoate methyltransferase activity. It is however likely that, in Arabidopsis, the enzyme catalyzes the methylation of nonaprenyldihydroxybenzoate as it is the prevalent polyprenoid in this plant species. The enzyme is a mitochondrial-loc…	mitochondrion		cytoskeleton:24134884;mitochondrion:21841088;mitochondrion:27943495
AT2G31240	Tetratricopeptide repeat (TPR)-like superfamily protein;	mitochondrion		mitochondrion:21841088;mitochondrion:27943495
AT2G31490	;	mitochondrion		mitochondrion:12837548;mitochondrion:18189341;mitochondrion:20197505;mitochondrion:21472856;mitochondrion:21841088;mitochondrion:23761796;mitochondrion:27943495
AT2G31670	Stress responsive alpha-beta barrel domain protein;	peroxisome	peroxisome:24130194	mitochondrion:27943495;peroxisome:17951448;peroxisome:19329564;peroxisome:24130194;plastid:15028209;plastid:16207701;plastid:20423899;plastid:21531424;plastid:18431481;plastid:18633119;plastid:20061580;plastid:21539947;plastid:24361574
AT2G33340	MOS4-associated complex 3B;Encodes MAC3B, a U-box proteins with homology to the yeast and human E3 ubiquitin ligase Prp19. Associated with the MOS4-Associated Complex (MAC). Involved in plant innate immunity.	nucleus		cytoskeleton:24134884;golgi:25900983;mitochondrion:27943495;nucleus:27177187;plastid:15028209
AT2G33800	Ribosomal protein S5 family protein;	plastid	plastid:27006483	golgi:25900983;golgi:25900983;golgi:25900983;golgi:25900983;golgi:25900983;mitochondrion:27122571;mitochondrion:27943495;nucleus:14617066;nucleus:23396599;plasma membrane:25641898;plasma membrane:19334764;plastid:11826309;plastid:14729914;plastid:15028209;plastid:16207701;plastid:20423899;plastid:21531424;plastid:23549413;plastid:23851315;plastid:26987276;plastid:24872594;plastid:18431481;plastid…
AT2G34040	Apoptosis inhibitory protein 5 (API5);	cytosol		cytoskeleton:24134884;cytosol:21166475;golgi:25900983;golgi:25900983;golgi:25900983
AT2G34590	Transketolase family protein;	plastid		extracellular:26572690;plastid:12766230;plastid:15028209;plastid:21531424;plastid:24872594;plastid:24361574
AT2G35720	DNAJ heat shock N-terminal domain-containing protein;Encodes OWL1, a J-domain protein involved in perception of very low light fluences.	peroxisome		cytoskeleton:24134884;mitochondrion:21841088;mitochondrion:27943495;plasma membrane:21433285;plastid:22923678;unclear:16618929
AT2G35795	Chaperone DnaJ-domain superfamily protein;	mitochondrion		mitochondrion:27943495
AT2G36070	translocase inner membrane subunit 44-2;One of two genes in Arabidopsis that encode a putative subunit of the mitochondrial inner membrane translocase complex. TIM44 subunit is thought to provide the energy for translocation via hydrolysis of ATP.	mitochondrion		golgi:25900983;golgi:25900983;mitochondrion:14730085;mitochondrion:18385124;mitochondrion:21472856;mitochondrion:21841088;mitochondrion:27943495;plasma membrane:19334764
AT2G37410	translocase inner membrane subunit 17-2;Mitochondrial inner membrane translocase. Together with AtTIM17-1, TIM17-2 has a long C-terminal extension not present in other TIMs. The extension is located in the outer membrane and so TIM17-2 links the inner and outer mitochondrial membranes. The C-terminal region is essential for protein import into mitochondria via the general import pathway but is no…	mitochondrion		golgi:25900983;golgi:25900983;golgi:25900983;mitochondrion:14730085;mitochondrion:15276431;mitochondrion:21841088;mitochondrion:22923678;mitochondrion:27943495;plasma membrane:19334764
AT2G37860	Protein of unknown function (DUF3411);Encodes a protein of unknown function. Mutants have pale leaves, lower cell density in the palisade parenchyma and increased sensitivity to ozone and virulent Pseudomonas syringae	plastid		plastid:18431481;plastid:22923678;unclear:16618929
AT2G39700	expansin A4;putative expansin. Naming convention from the Expansin Working Group (Kende et al, 2004. Plant Mol Bio). Involved in the formation of nematode-induced syncytia in roots of Arabidopsis thaliana.	extracellular		cytoskeleton:24134884;cytosol:21166475;extracellular:16287169;extracellular:16356755;extracellular:16729891;extracellular:26572690;vacuole:15215502
AT2G39970	Mitochondrial substrate carrier family protein;	peroxisome	peroxisome:19073763	golgi:25900983;mitochondrion:27943495;peroxisome:18931141;peroxisome:19329564;peroxisome:24130194;plasma membrane:19334764;vacuole:17151019
AT2G41380	S-adenosyl-L-methionine-dependent methyltransferases superfamily protein;	mitochondrion	mitochondrion:19995732;nucleus:19995732	mitochondrion:11743115;mitochondrion:14671022
AT2G42490	Copper amine oxidase family protein;	peroxisome	peroxisome:19329564	cytoskeleton:24134884;golgi:25900983;golgi:25900983;peroxisome:18931141;peroxisome:19329564;peroxisome:24130194
AT2G42680	multiprotein bridging factor 1A;One of three genes in A. thaliana encoding multiprotein bridging factor 1, a highly conserved transcriptional coactivator. May serve as a bridging factor between a bZIP factor and TBP. Its expression is developmentally regulated.	nucleus
AT2G43360	Radical SAM superfamily protein;Catalyzes the conversion of dethiobiotin to biotin.	mitochondrion		mitochondrion:27943495
AT2G43400	electron-transfer flavoprotein:ubiquinone oxidoreductase;Encodes a unique electron-transfer flavoprotein:ubiquinone oxidoreductase that is localized to the mitochondrion. Mutants are more sensitive to sugar starvation when plants are kept in the dark for long periods.	mitochondrion	mitochondrion:16055629	mitochondrion:18385124;mitochondrion:27943495
AT2G45060	Uncharacterised conserved protein UCP022280;	mitochondrion		mitochondrion:14671022;mitochondrion:21472856;mitochondrion:21841088;mitochondrion:22923678;mitochondrion:27943495;unclear:16618929
AT2G46540	;	mitochondrion		mitochondrion:14671022;mitochondrion:15276431;mitochondrion:21472856;mitochondrion:22923678;mitochondrion:23761796;mitochondrion:27943495
AT3G01790	Ribosomal protein L13 family protein;	mitochondrion	mitochondrion:in house	golgi:25900983;mitochondrion:21841088;mitochondrion:27943495
AT3G01800	Ribosome recycling factor;	mitochondrion		extracellular:26572690;mitochondrion:14671022;mitochondrion:21841088;mitochondrion:27943495
AT3G02660	Tyrosyl-tRNA synthetase, class Ib, bacterial/mitochondrial;	plastid	mitochondrion:16251277;mitochondrion:19733576;plastid:16251277;plastid:19733576	golgi:25900983;mitochondrion:27943495;plastid:20423899;plastid:21531424;plastid:18431481;plastid:20061580;plastid:24361574;plastid:24872594
AT3G02780	isopentenyl pyrophosphate:dimethylallyl pyrophosphate isomerase 2;Encodes a protein with isopentenyl diphosphate:dimethylallyl diphosphate isomerase activity. There is genetic evidence that it functions in the mevalonate, but not the MEP biosynthetic pathway.	plastid	mitochondrion:in house;plastid:in house	cytosol:25587034;extracellular:26572690;mitochondrion:21841088;mitochondrion:22923678;plastid:18431481;plastid:20061580;plastid:24361574
AT3G03060	P-loop containing nucleoside triphosphate hydrolases superfamily protein;	mitochondrion		extracellular:16287169;mitochondrion:27943495;plasma membrane:21433285;unclear:16618929
AT3G03070	NADH-ubiquinone oxidoreductase-related;	mitochondrion		mitochondrion:14671022;mitochondrion:17406791;mitochondrion:20197505;mitochondrion:21296373;mitochondrion:21472856;mitochondrion:23761796;mitochondrion:27122571;mitochondrion:27943495
AT3G03920	H/ACA ribonucleoprotein complex, subunit Gar1/Naf1 protein;	nucleus	nucleus:15496452	cytoskeleton:24134884;extracellular:26572690;golgi:25900983;nucleus:15496452;nucleus:23396599;plasma membrane:19334764;plastid:15322131
AT3G04610	RNA-binding KH domain-containing protein;	nucleus
AT3G05060	NOP56-like pre RNA processing ribonucleoprotein;SAR DNA-binding protein, putative, strong similarity to SAR DNA-binding protein-1 (Pisum sativum) GI:3132696; contains Pfam profile PF01798: Putative snoRNA binding domain; encodes NOP58-like protein	nucleus		cytoskeleton:24134884;golgi:25900983;golgi:25900983;golgi:25900983;golgi:25900983;golgi:25900983;nucleus:14505352;nucleus:15496452;nucleus:27177187;nucleus:23396599;plasma membrane:19334764;plasma membrane:21433285;vacuole:25900983
AT3G05910	Pectinacetylesterase family protein;	extracellular		extracellular:26572690;extracellular:28155257;golgi:25900983;golgi:25900983
AT3G05970	long-chain acyl-CoA synthetase 6;encode peroxisomal long-chain acyl-CoA synthetase (LACS) isozymes	peroxisome	peroxisome:12366803	golgi:25900983;golgi:25900983;golgi:25900983;golgi:25900983;mitochondrion:27943495;nucleus:23396599;peroxisome:18931141;peroxisome:19329564;peroxisome:24130194;plasma membrane:19334764;plasma membrane:21433285;plastid:23549413;vacuole:25900983
AT3G06850	2-oxoacid dehydrogenases acyltransferase family protein;dihydrolipoamide branched chain acyltransferase	mitochondrion		extracellular:26572690;mitochondrion:14671022;mitochondrion:14764908;mitochondrion:21296373;mitochondrion:23444301;mitochondrion:24727099;mitochondrion:27943495;mitochondrion:23444301
AT3G06860	multifunctional protein 2;Encodes a multifunctional protein. Involved in peroxisomal fatty acid beta oxidation. Loss-of-function mutant lacks hydroxyacyl-CoA dehydrogenase activity and have reduced levels of long-chain enoyl-CoA hydratase activity. The mutant has fewer but larger peroxisomes.	peroxisome	peroxisome:10737809;peroxisome:15141064;peroxisome:16236160	extracellular:26572690;golgi:25900983;golgi:25900983;mitochondrion:24727099;mitochondrion:27122571;mitochondrion:27943495;nucleus:15496452;nucleus:23396599;peroxisome:17951448;peroxisome:18931141;peroxisome:19329564;peroxisome:24130194;plasma membrane:19334764;plasma membrane:21433285
AT3G07170	Sterile alpha motif (SAM) domain-containing protein;	nucleus		cytoskeleton:24134884
AT3G07660	Kinase-related protein of unknown function (DUF1296);	nucleus		cytoskeleton:24134884;plasma membrane:21433285
AT3G07770	HEAT SHOCK PROTEIN 89.1;	mitochondrion	mitochondrion:18368500	golgi:25900983;golgi:25900983;golgi:25900983;golgi:25900983;mitochondrion:11743115;mitochondrion:14671022;mitochondrion:17137349;mitochondrion:21472856;mitochondrion:21841088;mitochondrion:24727099;mitochondrion:27943495;nucleus:23396599;plasma membrane:19334764;plasma membrane:21433285;plastid:20061580;plastid:24361574
AT3G10410	SERINE CARBOXYPEPTIDASE-LIKE 49;	vacuole	vacuole:23175753	cytosol:21166475;extracellular:26572690;extracellular:28155257;golgi:25900983;vacuole:15215502;vacuole:15539469;vacuole:24393051;vacuole:23903016
AT3G13150	Tetratricopeptide repeat (TPR)-like superfamily protein;	cytosol		cytoskeleton:24134884
AT3G13490	Lysyl-tRNA synthetase, class II;Encodes a dual targeted lysyl-tRNA ligase that is found both in the mitochondrion and the chloroplast. Plants mutated in this gene exhibit an ovule abortion phenotype.	mitochondrion,plastid	mitochondrion:16251277;mitochondrion:19733576;plastid:16251277;plastid:19733576	mitochondrion:27122571;mitochondrion:27943495;plastid:21531424;plastid:18431481;plastid:20061580;plastid:24361574
AT3G13570	SC35-like splicing factor 30A;encodes an SC35-like splicing factor of 30 kD that is localized to the nuclear specks.	nucleus	nucleus:15133128	cytosol:21166475;nucleus:27177187;plasma membrane:19334764
AT3G14390	Pyridoxal-dependent decarboxylase family protein;	plastid		plastid:21531424;plastid:20061580;plastid:24361574
AT3G15000	cobalt ion binding;	mitochondrion	mitochondrion:17666025;mitochondrion:22566615;plastid:22566615	mitochondrion:14671022;mitochondrion:15276431;mitochondrion:21472856;mitochondrion:21841088;mitochondrion:22923678;mitochondrion:27122571;mitochondrion:27943495;peroxisome:18931141;plastid:21531424;plastid:24872594
AT3G16170	AMP-dependent synthetase and ligase family protein;	peroxisome	cytosol:22920973	mitochondrion:27943495
AT3G17465	ribosomal protein L3 plastid;encodes a putative L3 ribosomal protein targeted to the plastid.	mitochondrion		mitochondrion:14671022;mitochondrion:21841088;mitochondrion:27943495
AT3G17910	Surfeit locus 1 cytochrome c oxidase biogenesis protein;Surfeit 1 (SURF1) mRNA. Similar to human SURF1 which is known to be involved in cytochrome c oxidase assembly.	mitochondrion		mitochondrion:14671022;mitochondrion:21841088;mitochondrion:22923678;mitochondrion:27943495
AT3G18035	winged-helix DNA-binding transcription factor family protein;A linker histone like protein	nucleus		nucleus:27177187;plasma membrane:19334764
AT3G18790	;	nucleus		cytosol:21166475;nucleus:23396599;plastid:15028209
AT3G22590	PLANT HOMOLOGOUS TO PARAFIBROMIN;Encodes PLANT HOMOLOGOUS TO PARAFIBROMIN (PHP), a homolog of human Paf1 Complex (Paf1C) subunit Parafibromin. Human Parafibromin assists in mediating output from the Wnt signaling pathway, and dysfunction of the encoding gene HRPT2 conditions specific cancer-related disease phenotypes. PHP resides in a ~670-kDa protein complex in nuclear extracts, and physically i…	cytosol		cytoskeleton:24134884;nucleus:27177187
AT3G25120	Mitochondrial import inner membrane translocase subunit Tim17/Tim22/Tim23 family protein;	mitochondrion	mitochondrion:17098851
AT3G26380	Melibiase family protein;	extracellular		extracellular:15593128;extracellular:16356755;extracellular:26572690;extracellular:28155257
AT3G26770	NAD(P)-binding Rossmann-fold superfamily protein;	mitochondrion		mitochondrion:21841088;mitochondrion:27943495
AT3G27080	translocase of outer membrane 20 kDa subunit 3;Component of the TOM complex involved in transport of nuclear-encoded mitochondrial proteins	mitochondrion		mitochondrion:11161051;mitochondrion:11870776;mitochondrion:14730085;mitochondrion:15604729;mitochondrion:21841088;mitochondrion:24727099;mitochondrion:27122571;mitochondrion:27943495;mitochondrion:21896887;plasma membrane:19334764
AT3G27550	RNA-binding CRS1 / YhbY (CRM) domain protein;	nucleus
AT3G27930	;	mitochondrion		mitochondrion:27943495;mitochondrion:21896887
AT3G28730	high mobility group;encodes a component of the FAcilitates Chromatin Transcription (FACT) complex, SSRP1. Along with STP16 binds to the promoter of FLC.	nucleus
AT3G42170	BED zinc finger ;hAT family dimerisation domain;transposase-like gene with conserved domains from the family of hAT transposases that includes hobo from Drosophila melanogaster, Activator (Ac) from maize, and Tam3 from snapdragon but lacks several amino acids known to be essential for Ac transposition5. The DAYSLEEPER gene lacks 8 bp duplications and TIRs (a common feature of transcriptionally si…	nucleus		cytosol:21166475;golgi:25900983;golgi:25900983;golgi:25900983;golgi:25900983
AT3G42790	alfin-like 3;AL3 encodes a member of the Alfin-Like family of nuclear-localized PhD domain containing homeodomain proteins. Binds to H3K4 di or trimethylated DNA.	nucleus
AT3G45300	isovaleryl-CoA-dehydrogenase;Encodes isovaleryl-coenzyme a dehydrogenase. Mutants have increases in 12 seed free amino acids, accumulation of seed homomethionine and 3-isovaleroyloxypropyl-glucosinolate, with a concomitant decrease in seed 3-benzoyloxypropyl-glucosinolate.	mitochondrion	mitochondrion:11402190	extracellular:26572690;mitochondrion:11743115;mitochondrion:14671022;mitochondrion:17137349;mitochondrion:18385124;mitochondrion:21472856;mitochondrion:21841088;mitochondrion:27943495
AT3G46030	Histone superfamily protein;	nucleus
AT3G47520	malate dehydrogenase;Encodes a protein with NAD-dependent malate dehydrogenase activity, located in chloroplasts.	plastid	plastid:in house	extracellular:26572690;golgi:25900983;golgi:25900983;golgi:25900983;golgi:25900983;golgi:25900983;mitochondrion:14671022;mitochondrion:21472856;mitochondrion:21841088;mitochondrion:24727099;mitochondrion:27943495;nucleus:27177187;nucleus:23396599;plasma membrane:25641898;plasma membrane:19334764;plastid:12766230;plastid:15028209;plastid:15295017;plastid:16207701;plastid:20423899;plastid:21531424;…
AT3G47930	L-galactono-1,4-lactone dehydrogenase;L-Galactono-1,4-lactone dehydrogenase, catalyzes the final step of ascorbate biosynthesis	mitochondrion		golgi:25900983;mitochondrion:12837548;mitochondrion:14671022;mitochondrion:20197505;mitochondrion:21296373;mitochondrion:21472856;mitochondrion:21841088;mitochondrion:22923678;mitochondrion:23761796;mitochondrion:24727099;mitochondrion:27943495;plasma membrane:19334764;plasma membrane:21433285;unclear:16618929
AT3G48540	Cytidine/deoxycytidylate deaminase family protein;	plastid
AT3G48560	chlorsulfuron/imidazolinone resistant 1;Catalyzes the formation of acetolactate from pyruvate, the first step in valine and isoleucine biosynthesis. Requires FAD, thiamine pyrophosphate and Mg. Inhibited by the sulphonylurea herbicide, chlorsulphuron, and the imidazolinone herbicide, imazapyr. The obtained crystal structure of acetohydroxyacid synthase AHAS, EC 2.2.1.6)in complex with herbicides …	plastid		golgi:25900983;golgi:25900983;golgi:25900983;plastid:21531424;plastid:18431481;plastid:20061580;plastid:24361574
AT3G48670	XH/XS domain-containing protein;Encodes IDN2 (INVOLVED IN DE NOVO 2), a double-stranded RNA-binding protein involved in de novo methylation and small interfering RNA (siRNA)-mediated maintenance methylation. IND2 is a component of the RNA-directed DNA methylation pathway.	nucleus		cytosol:22522809
AT3G48710	DEK domain-containing chromatin associated protein;	nucleus		cytoskeleton:24134884
AT3G49240	Pentatricopeptide repeat (PPR) superfamily protein;	mitochondrion		mitochondrion:17137349;mitochondrion:21841088;mitochondrion:27943495;plasma membrane:21433285;plastid:18431481;plastid:20423899
AT3G49430	SER/ARG-rich protein 34A;	nucleus		cytosol:21166475;extracellular:26572690;nucleus:15496452;nucleus:24832081
AT3G49600	ubiquitin-specific protease 26;Encodes a ubiquitin-specific protease which catalyzes deubiquitination of histone H2B and is required for heterochromatin silencing.Loss of function mutations display autonomous endosperm development and embryo arrest. Loss of function also results in an increase in expression of the PcG complex target gene PHE1.	nucleus		nucleus:15496452
AT3G50930	cytochrome BC1 synthesis;	mitochondrion	mitochondrion:19995732	mitochondrion:14671022;mitochondrion:15276431;mitochondrion:21296373;mitochondrion:21841088;mitochondrion:22923678;mitochondrion:27122571;mitochondrion:27943495;mitochondrion:21896887;plasma membrane:21433285;unclear:16618929
AT3G51550	Malectin/receptor-like protein kinase family protein;Encodes a synergid-expressed, plasma-membrane localized receptor-like kinase that accumulates asymetrically in the synergid membrnane at the filiform apparatus and mediates male-female gametophyte interactions during pollen tube reception.	plasma membrane		golgi:25900983;golgi:25900983;golgi:25900983;golgi:25900983;golgi:25900983;plasma membrane:14506206;plasma membrane:15308754;plasma membrane:15574830;plasma membrane:16618929;plasma membrane:16635983;plasma membrane:17317660;plasma membrane:17644812;plasma membrane:19334764;plasma membrane:20843791;plasma membrane:21433285;plasma membrane:22215637;plasma membrane:22318864;plasma membrane:22923678…
AT3G52660	RNA-binding (RRM/RBD/RNP motifs) family protein;	nucleus		cytosol:21166475
AT3G54150	S-adenosyl-L-methionine-dependent methyltransferases superfamily protein;	cytosol		cytosol:21166475
AT3G55460	SC35-like splicing factor 30;encodes an SC35-like splicing factor that is localized to nuclear specks.	nucleus	nucleus:15133128	nucleus:27177187
AT3G56070	rotamase cyclophilin 2;rotamase cyclophilin 2 (ROC2) exhibiting peptidyl-prolyl cis-trans isomerase activity involved in signal transduction.	mitochondrion		extracellular:26572690;golgi:22430844;mitochondrion:21472856;mitochondrion:21841088;mitochondrion:22923678;mitochondrion:24727099;mitochondrion:27943495;plastid:24361574
AT3G57150	homologue of NAP57;Encodes a putative pseudouridine synthase (NAP57).	nucleus		cytoskeleton:24134884;cytosol:18433157;extracellular:26572690;golgi:25900983;golgi:25900983;golgi:25900983;golgi:25900983;nucleus:15496452;nucleus:18433157;nucleus:27177187;nucleus:23396599;plasma membrane:19334764;plasma membrane:21433285;plasma membrane:22318864
AT3G57660	nuclear RNA polymerase A1;Encodes a subunit of RNA polymerase I (aka RNA polymerase A).	nucleus		cytoskeleton:24134884;nucleus:14617066;nucleus:23396599
AT3G58110	;	nucleus
AT3G58140	phenylalanyl-tRNA synthetase class IIc family protein;	plastid	mitochondrion:16251277;plastid:16251277	golgi:25900983;golgi:25900983;golgi:25900983;golgi:25900983;mitochondrion:21841088;mitochondrion:27943495;plastid:20423899;plastid:21531424;plastid:23851315;plastid:18431481;plastid:20061580;plastid:24361574;plastid:24872594;vacuole:25900983
AT3G59280	Protein Transporter, Pam16;mutant exhibited resistance to growth on media containing thaxtomin due to a difference in the rate of uptake of the toxin.We proposed that TXR1 is a component of, or regulator of, a dispensable transport mechanism.	mitochondrion	mitochondrion:24153405	mitochondrion:22923678;mitochondrion:27943495;unclear:16618929
AT3G59820	LETM1-like protein;	mitochondrion	mitochondrion:19995732	mitochondrion:14671022;mitochondrion:15276431;mitochondrion:22923678;mitochondrion:27122571;mitochondrion:27943495;plasma membrane:19334764;plasma membrane:21433285;unclear:16618929
AT3G62120	Class II aaRS and biotin synthetases superfamily protein;	cytosol		cytosol:21166475;extracellular:26572690;golgi:25900983;golgi:25900983;golgi:25900983;plasma membrane:19334764
AT3G62530	ARM repeat superfamily protein;	mitochondrion		mitochondrion:12606038;mitochondrion:14671022;mitochondrion:18385124;mitochondrion:21472856;mitochondrion:21841088;mitochondrion:22923678;mitochondrion:24727099;mitochondrion:27943495;mitochondrion:21896887;nucleus:15496452;nucleus:27177187;plastid:18431481;plastid:20061580;plastid:24361574
AT3G62790	NADH-ubiquinone oxidoreductase-related;	mitochondrion		mitochondrion:12837548;mitochondrion:14671022;mitochondrion:18189341;mitochondrion:21841088;mitochondrion:23761796;mitochondrion:27943495
AT3G62920	;	mitochondrion		mitochondrion:27943495
AT4G02060	Minichromosome maintenance (MCM2/3/5) family protein;Member of the minichromosome maintenance complex, involved in DNA replication initiation. Abundant in proliferating and endocycling tissues. Localized in the nucleus during G1, S and G2 phases of the cell cycle, and are released into the cytoplasmic compartment during mitosis. Binds chromatin.	nucleus	nucleus:10751170
AT4G02480	AAA-type ATPase family protein;	plastid		golgi:25900983;golgi:25900983;golgi:25900983
AT4G02720	;	nucleus
AT4G03240	frataxin homolog;Encodes AtFH, a frataxin homolog. Frataxin is required for the biogenesis of mitochondria in different organisms. AtFH knock-out mutants are lethal. Required for full activity of mitochondrial Fe-S proteins. Deficiency of AtFH induces oxidative stress.	mitochondrion
AT4G05020	NAD(P)H dehydrogenase B2;	mitochondrion	mitochondrion:12972666;mitochondrion:18703057;mitochondrion:23841539	mitochondrion:14671022;mitochondrion:21472856;mitochondrion:21841088;mitochondrion:22923678;mitochondrion:27122571;mitochondrion:27943495;mitochondrion:21896887;plasma membrane:19334764;plasma membrane:21433285;unclear:16618929
AT4G05160	AMP-dependent synthetase and ligase family protein;Encodes a peroxisomal protein involved in the activation of fatty acids through esterification with CoA. At4g05160 preferentially activates fatty acids with medium chain length (C6:0 and C7:0) as well as even-numbered long-chain fatty acids (C14:0, C16:0 and C18:0). At4g05160 was also able to catalyze the conversion of OPC-6:0 to its CoA ester an…	peroxisome	peroxisome:15677481	extracellular:26572690;mitochondrion:21841088;mitochondrion:27943495;peroxisome:17951448;peroxisome:18931141;peroxisome:19329564;peroxisome:24130194;plasma membrane:21433285
AT4G05530	indole-3-butyric acid response 1;Encodes a peroxisomal member of the short-chain dehydrogenase/reductase (SDR) family of enzymes. Loss of IBR1 function causes increased resistance to indole-3-butyric acid without affecting plant responses to IAA, NAA, and 2,4-D. This enzyme may be responsible for catalyzing a dehydrogenation step in the beta-oxidation-like conversion of IBA to IAA.	peroxisome	peroxisome:17951448;peroxisome:18931141;peroxisome:19043666	cytoskeleton:24134884;extracellular:26572690;golgi:25900983;golgi:25900983;golgi:25900983;golgi:25900983;nucleus:23396599;peroxisome:17951448;peroxisome:18931141;peroxisome:19329564;peroxisome:24130194
AT4G15640	;	mitochondrion	mitochondrion:in house	golgi:25900983;mitochondrion:14671022;mitochondrion:27943495
AT4G17140	pleckstrin homology (PH) domain-containing protein;	golgi		golgi:22430844;golgi:25900983;golgi:25900983;golgi:25900983;golgi:25900983;mitochondrion:27943495;plasma membrane:25641898;plasma membrane:19334764;plasma membrane:21433285;plasma membrane:26781341;vacuole:18686298
AT4G17650	Polyketide cyclase / dehydrase and lipid transport protein;	mitochondrion		mitochondrion:27122571;mitochondrion:27943495
AT4G19540	IND1(iron-sulfur protein required for NADH dehydrogenase)-like;	mitochondrion		mitochondrion:21841088;mitochondrion:27943495
AT4G22000	;	nucleus
AT4G22010	SKU5 similar 4;	extracellular		extracellular:16356755;extracellular:26572690;extracellular:28155257;golgi:25900983;golgi:25900983;golgi:25900983;golgi:25900983;golgi:25900983;nucleus:27177187;plasma membrane:25641898;plasma membrane:19334764;plasma membrane:21433285;vacuole:25900983
AT4G24270	EMBRYO DEFECTIVE 140;A locus involved in embryogenesis. Mutations in this locus result in embryo lethality.	nucleus		plasma membrane:19334764
AT4G24780	Pectin lyase-like superfamily protein;	extracellular		extracellular:15694452;extracellular:16356755;extracellular:26572690;extracellular:28155257;extracellular:25852701;golgi:25900983
AT4G25130	peptide met sulfoxide reductase 4;Encodes a chloroplast-localized methionine sulfoxide reductase that is a member of the MSRA family. Involved in protection of chloroplasts from oxidative stress.	plastid		mitochondrion:21841088;mitochondrion:22923678;mitochondrion:23444301;mitochondrion:27943495;mitochondrion:23444301;plastid:20423899;plastid:21531424;plastid:23851315;plastid:20061580;plastid:24872594;plastid:18431481;plastid:18633119;plastid:20061580;plastid:24361574;plastid:24872594
AT4G25280	P-loop containing nucleoside triphosphate hydrolases superfamily protein;	mitochondrion		mitochondrion:27943495
AT4G25550	Cleavage/polyadenylation specificity factor, 25kDa subunit;	cytosol		cytoskeleton:24134884;extracellular:26572690;plasma membrane:19334764
AT4G26210	Mitochondrial ATP synthase subunit G protein;	mitochondrion		mitochondrion:21841088;mitochondrion:24727099;mitochondrion:27943495;plastid:22923678
AT4G26500	chloroplast sulfur E;Sulfur acceptor that interacts with and activates the cysteine desulfurases, AtSufS in plastids and AtNifS1 in mitochondria, and both activations are vital during embryogenesis. Dual localization in mitochondria and chloroplasts. Involved in Fe-S cluster biogenesis in mitochondria and plastids. Expressed in all major tissues, with higher expression in green parts. Its express…	plastid	plastid:16455656	mitochondrion:27943495;plastid:18431481;plastid:20423899;plastid:21531424;plastid:24872594;plastid:18633119;plastid:24361574
AT4G26630	DEK domain-containing chromatin associated protein;	nucleus		cytoskeleton:24134884;cytosol:21166475;extracellular:26572690;nucleus:23396599
AT4G26910	Dihydrolipoamide succinyltransferase;	mitochondrion		extracellular:26572690;mitochondrion:14671022;mitochondrion:15276431;mitochondrion:18385124;mitochondrion:21472856;mitochondrion:22923678;mitochondrion:24727099;mitochondrion:27943495;nucleus:23396599;vacuole:25900983
AT4G29430	ribosomal protein S15A E;	cytosol		cytosol:15734919;mitochondrion:27943495
AT4G30270	xyloglucan endotransglucosylase/hydrolase 24;encodes a protein similar to endo xyloglucan transferase in sequence. It is also very similar to BRU1 in soybean, which is involved in brassinosteroid response.	extracellular	extracellular:15610358	extracellular:16287169;extracellular:16356755;extracellular:16729891;extracellular:28155257;extracellular:25852701;golgi:22430844;plasma membrane:17644812;plasma membrane:21433285
AT4G30280	xyloglucan endotransglucosylase/hydrolase 18;Encodes a xyloglucan endotransglucosylase/hydrolase with only only the endotransglucosylase (XET; EC 2.4.1.207) activity towards xyloglucan and non-detectable endohydrolytic (XEH; EC 3.2.1.151) activity. Expressed in the mature or basal regions of both the main and lateral roots, but not in the tip of these roots where cell division occurs.	extracellular		extracellular:26572690;golgi:22430844
AT4G31810	ATP-dependent caseinolytic (Clp) protease/crotonase family protein;	mitochondrion		mitochondrion:11743115;mitochondrion:14671022;mitochondrion:23444301;mitochondrion:27943495;mitochondrion:23444301
AT4G32400	Mitochondrial substrate carrier family protein;Encodes a plastidial nucleotide uniport carrier protein required to export newly synthesized adenylates into the cytosol.	mitochondrion,plastid	mitochondrion:21330298;plastid:21330298	plasma membrane:19334764;plastid:18431481;plastid:22923678;plastid:20061580;plastid:24872594;unclear:16618929
AT4G32605	Mitochondrial glycoprotein family protein;	mitochondrion		extracellular:26572690;mitochondrion:18385124
AT4G32720	La protein 1;Encodes AtLa1, a member of the highly abundant phosphoprotein La proteins. Predominantly localized to the nucleoplasm and was also detected in the nucleolar cavity. Has RNA binding activity. Required for normal ribosome biogenesis and embryogenesis.	nucleus	nucleus:12837943	cytoskeleton:24134884;cytosol:21166475
AT4G33520	P-type ATP-ase 1;Encodes a putative metal-transporting P-type ATPase.	plastid	plastid:15772282	mitochondrion:27943495;plastid:16207701;plastid:21531424;plastid:22923678;plastid:24361574
AT4G35630	phosphoserine aminotransferase;Encodes a phosphoserine aminotransferase which is involved in serine biosynthesis in the chloroplast which operates via the phosphorylated pathway.	plastid	plastid:9881164	cytosol:22522809;extracellular:26572690;mitochondrion:27122571;mitochondrion:27943495;plasma membrane:19334764;plastid:18431481;plastid:20423899;plastid:21531424;plastid:22923678;plastid:23851315;plastid:18633119;plastid:20061580;plastid:24361574;plastid:24872594
AT4G36420	Ribosomal protein L12 family protein;	mitochondrion	mitochondrion:in house	mitochondrion:27943495
AT4G36680	Tetratricopeptide repeat (TPR)-like superfamily protein;	mitochondrion		mitochondrion:14671022;mitochondrion:21841088;mitochondrion:27943495
AT4G39880	Ribosomal protein L23/L15e family protein;	mitochondrion		mitochondrion:21841088;mitochondrion:27943495
AT5G02740	Ribosomal protein S24e family protein;	mitochondrion		golgi:25900983;mitochondrion:21841088;mitochondrion:27943495
AT5G04130	DNA GYRASE B2;	mitochondrion		golgi:25900983;golgi:25900983;golgi:25900983;golgi:25900983;golgi:25900983;mitochondrion:14671022;mitochondrion:27122571;mitochondrion:27943495;plastid:24872594;vacuole:25900983
AT5G05520	Outer membrane OMP85 family protein;	mitochondrion		golgi:25900983;golgi:25900983;golgi:25900983;mitochondrion:21472856;mitochondrion:21841088;mitochondrion:22923678;mitochondrion:27943495;mitochondrion:21896887;plasma membrane:21433285;unclear:16618929;vacuole:15215502
AT5G05990	Mitochondrial glycoprotein family protein;	mitochondrion		mitochondrion:21841088;mitochondrion:27943495
AT5G06460	ubiquitin activating enzyme 2;Encodes a ubiquitin-activating enzyme (E1), involved in the first step in conjugating multiple ubiquitins to proteins targeted for degradation. Gene is expressed in most tissues examined.	nucleus		cytosol:21166475;golgi:25900983;golgi:25900983;golgi:25900983
AT5G08040	mitochondrial import receptor subunit TOM5 homolog;	mitochondrion		mitochondrion:22923678;mitochondrion:27943495;mitochondrion:21896887;unclear:16618929
AT5G08450	;	nucleus	nucleus:24058159
AT5G09770	Ribosomal protein L17 family protein;	mitochondrion		mitochondrion:21841088;mitochondrion:27943495
AT5G11500	;	nucleus
AT5G13610	Protein of unknown function (DUF155);	mitochondrion		mitochondrion:14671022;mitochondrion:27943495;unclear:16618929
AT5G14450	GDSL-like Lipase/Acylhydrolase superfamily protein;	extracellular		extracellular:16287169
AT5G14580	polyribonucleotide nucleotidyltransferase, putative;	mitochondrion		mitochondrion:27122571;mitochondrion:27943495
AT5G15270	RNA-binding KH domain-containing protein;	nucleus
AT5G15320	;	mitochondrion		mitochondrion:27943495
AT5G15910	NAD(P)-binding Rossmann-fold superfamily protein;	mitochondrion		golgi:25900983;golgi:25900983;mitochondrion:21841088;mitochondrion:22923678;mitochondrion:27943495;plasma membrane:19334764;unclear:16618929
AT5G15980	Pentatricopeptide repeat (PPR) superfamily protein;	mitochondrion		mitochondrion:21841088;mitochondrion:27943495;plasma membrane:21433285
AT5G16260	RNA binding (RRM/RBD/RNP motifs) family protein;Encodes a RNA binding protein ELF9 (EARLY FLOWERING9). Loss of ELF9 function in the Wassilewskija ecotype causes early flowering in short days. ELF9 reduces SOC1 (SUPPRESSOR OF OVEREXPRESSION OF CO1) transcript levels, possibly via nonsense-mediated mRNA decay.	nucleus		cytosol:21166475
AT5G16730	Plant protein of unknown function (DUF827);	cytosol	cytoskeleton:24134884	cytoskeleton:24134884;plasma membrane:26781341
AT5G19370	rhodanese-like domain-containing protein / PPIC-type PPIASE domain-containing protein;	plastid		golgi:25900983;golgi:25900983;mitochondrion:23444301;mitochondrion:27943495;mitochondrion:23444301;plasma membrane:25641898;plastid:18431481;plastid:20061580;plastid:24361574;plastid:24872594
AT5G20090	Uncharacterised protein family (UPF0041);	mitochondrion		mitochondrion:15276431;mitochondrion:21472856;mitochondrion:21841088;mitochondrion:22923678;mitochondrion:27943495;mitochondrion:21896887;plasma membrane:17644812;plasma membrane:19334764;vacuole:17151019
AT5G22010	replication factor C1;	nucleus		cytoskeleton:24134884
AT5G22080	Chaperone DnaJ-domain superfamily protein;	cytosol		cytoskeleton:24134884
AT5G23120	photosystem II stability/assembly factor, chloroplast (HCF136);encodes a stability and/or assembly factor of photosystem II	plastid		mitochondrion:27122571;plastid:11719511;plastid:11826309;plastid:14729914;plastid:15028209;plastid:15322131;plastid:16207701;plastid:16648217;plastid:18433418;plastid:20423899;plastid:21531424;plastid:23549413;plastid:23851315;plastid:20061580;plastid:23390424;plastid:24872594;plastid:18633119;plastid:21539947;plastid:24361574;plastid:16923014;plastid:18431481;plastid:20061580;plastid:24872594
AT5G26210	alfin-like 4;AL4 encodes a member of the Alfin-Like family of nuclear-localized PhD domain containing homeodomain proteins. Binds to H3K4 di or trimethylated DNA.	nucleus		cytosol:21166475;nucleus:23396599
AT5G27120	NOP56-like pre RNA processing ribonucleoprotein;SAR DNA-binding protein, putative, strong similarity to SAR DNA-binding protein-1 (Pisum sativum) GI:3132696; contains Pfam profile PF01798: Putative snoRNA binding domain; has similarity to MAR binding NOP58 protein	nucleus		cytoskeleton:24134884;golgi:25900983;golgi:25900983;golgi:25900983;nucleus:14505352;nucleus:15496452;nucleus:27177187;nucleus:23396599;plasma membrane:21433285
AT5G27660	DegP protease 14; Trypsin family protein with PDZ domain;	mitochondrion	mitochondrion:24719325;mitochondrion:25161662	mitochondrion:27122571
AT5G27740	ATPase family associated with various cellular activities (AAA) ;A locus involved in embryogenesis. Mutations in this locus result in embryo lethality.	nucleus		cytoskeleton:24134884
AT5G27760	Hypoxia-responsive family protein;	mitochondrion		mitochondrion:15604729;mitochondrion:21841088;mitochondrion:27943495
AT5G37720	ALWAYS EARLY 4;	nucleus	nucleus:11432957;nucleus:15496452	cytoskeleton:24134884;golgi:25900983;mitochondrion:27943495;nucleus:15496452
AT5G40930	translocase of outer membrane 20-4;Form of TOM20, which is a component of the TOM complex involved in transport of nuclear-encoded mitochondrial proteins	mitochondrion		mitochondrion:11161051;mitochondrion:11870776;mitochondrion:21841088;mitochondrion:27943495;mitochondrion:21896887;vacuole:17151019
AT5G41670	6-phosphogluconate dehydrogenase family protein;	mitochondrion		cytosol:21166475;extracellular:26572690;golgi:25900983;mitochondrion:14671022;mitochondrion:21841088;mitochondrion:24727099;mitochondrion:27943495;plasma membrane:19334764;plastid:21531424;plastid:23851315;plastid:20061580;plastid:21539947;plastid:24361574;plastid:24872594
AT5G41770	crooked neck protein, putative / cell cycle protein, putative;	nucleus		nucleus:23396599;plasma membrane:21433285
AT5G41970	Metal-dependent protein hydrolase;	mitochondrion		cytosol:21166475;mitochondrion:14671022;mitochondrion:27943495;plastid:20061580
AT5G43060	Granulin repeat cysteine protease family protein;	extracellular		cytosol:21166475;endoplasmic reticulum:22923678;extracellular:16356755;extracellular:16729891;extracellular:26572690;extracellular:28155257;golgi:25900983;golgi:25900983;golgi:25900983;mitochondrion:27943495;vacuole:15215502;vacuole:23903016
AT5G43280	delta(3,5),delta(2,4)-dienoyl-CoA isomerase 1;Encodes the peroxisomal delta 3,5-delta2,4-dienoyl-CoA isomerase, a enzyme involved in degradation of unsaturated fatty acids. Gene expression is induced upon seed germination.	peroxisome		extracellular:26572690;mitochondrion:27943495;peroxisome:17951448;peroxisome:18931141;peroxisome:19329564;peroxisome:24130194
AT5G43970	translocase of outer membrane 22-V;Subunit of the TOM complex, a translocase in the outer mitochondrial membrane that selectively allows proteins with a mitochondrial targeting sequence to enter the mitochondrion.	mitochondrion		golgi:25900983;golgi:25900983;golgi:25900983;golgi:25900983;golgi:25900983;mitochondrion:14730085;mitochondrion:21841088;mitochondrion:22923678;mitochondrion:27122571;mitochondrion:27943495;mitochondrion:21896887;plasma membrane:19334764;unclear:16618929;vacuole:17151019
AT5G44635	minichromosome maintenance (MCM2/3/5) family protein;	nucleus
AT5G44710	;	mitochondrion		mitochondrion:27943495
AT5G45590	Ribosomal protein L35;	mitochondrion		mitochondrion:27943495
AT5G46070	Guanylate-binding family protein;	cytosol,nucleus		golgi:25900983;golgi:25900983;golgi:25900983;golgi:25900983;nucleus:15496452;nucleus:23396599;plastid:15028209;vacuole:25900983
AT5G46280	Minichromosome maintenance (MCM2/3/5) family protein;	nucleus		plasma membrane:19334764
AT5G48970	Mitochondrial substrate carrier family protein;	mitochondrion	mitochondrion:22426856	mitochondrion:27943495
AT5G49880	mitotic checkpoint family protein;	nucleus		nucleus:27177187
AT5G49970	pyridoxin (pyrodoxamine) 5'-phosphate oxidase;encodes the bifunctional pyridoxine (pyridoxamine) 5’-phosphate oxidase (PPOX)(EC 1.4.3.5) that is involved in the formation of pyridoxal 5'-phosphate (member of the vitamin B6 group)	cytosol	cytosol:24599492	cytosol:21166475;mitochondrion:27943495
AT5G51040	;	mitochondrion		mitochondrion:21472856;mitochondrion:27943495
AT5G51280	DEAD-box protein abstrakt, putative;	nucleus		nucleus:23396599
AT5G51590	AT hook motif DNA-binding family protein;	cytosol,nucleus	cytosol:23335615;nucleus:23335615	extracellular:26572690
AT5G51660	cleavage and polyadenylation specificity factor 160;	nucleus		cytosol:21166475;golgi:25900983;golgi:25900983;golgi:25900983;nucleus:27177187;plasma membrane:21433285
AT5G51740	Peptidase family M48 family protein;	mitochondrion		mitochondrion:21841088;mitochondrion:27122571;mitochondrion:27943495
AT5G52040	RNA-binding (RRM/RBD/RNP motifs) family protein;encodes an arginine/serine-rich splicing factor. transcript is alternatively spliced and is differentially expressed in different tissues (flowers, roots, stems, and leaves) examined.	nucleus		cytosol:22522809;nucleus:23396599
AT5G52370	;	mitochondrion
AT5G52470	fibrillarin 1;encodes a fibrillarin, a key nucleolar protein in eukaryotes which associates with box C/D small nucleolar RNAs (snoRNAs) directing 2'-O-ribose methylation of the rRNA. This gene also encodes a novel box C/D snoRNA, U60.1f in its fifth intron that accumulates in seedlings and that their targeted residue on the 25 S rRNA is methylated.	nucleus	nucleus:10806224;nucleus:10829025;nucleus:15827145	cytoskeleton:24134884;extracellular:26572690;golgi:25900983;mitochondrion:27122571;nucleus:14505352;nucleus:15496452;nucleus:23396599;plasma membrane:22318864
AT5G53460	NADH-dependent glutamate synthase 1;NADH-dependent glutamate synthase	plastid		golgi:25900983;golgi:25900983;golgi:25900983;golgi:25900983;golgi:25900983;plasma membrane:19334764;plastid:15028209;plastid:18431481;plastid:21531424;plastid:18633119;plastid:20061580;plastid:24361574
AT5G53650	;	mitochondrion		mitochondrion:21841088;mitochondrion:27943495;plasma membrane:19334764
AT5G54640	Histone superfamily protein;Isolated from T-DNA insertion line, the rat5 mutant is deficient in T-DNA integration. Encodes histone2A protein.	nucleus		extracellular:28003327;nucleus:15496452;nucleus:23396599
AT5G55610	;	mitochondrion	mitochondrion:21896887;mitochondrion:21896887	golgi:25900983;mitochondrion:21841088;mitochondrion:22923678;mitochondrion:27943495;mitochondrion:21896887;plastid:15028209;unclear:16618929
AT5G55660	DEK domain-containing chromatin associated protein;	nucleus		cytoskeleton:24134884;extracellular:26572690;mitochondrion:14671022;nucleus:23396599
AT5G56670	Ribosomal protein S30 family protein;	cytosol,nucleus		cytosol:22522809
AT5G56940	Ribosomal protein S16 family protein;	mitochondrion	mitochondrion:18453549;mitochondrion:in house;plastid:18453549;plastid:in house	mitochondrion:27943495
AT5G57300	S-adenosyl-L-methionine-dependent methyltransferases superfamily protein;	mitochondrion		mitochondrion:11743115;mitochondrion:14671022;mitochondrion:21472856;mitochondrion:27943495
AT5G58220	transthyretin-like protein;Encodes a transthyretin-like S-allantoin synthase protein that catalyzes two steps in the allantoin biosynthesis pathway by acting as a hydroxyisourate hydrolase and a 2-oxo-4-hydroxy-4-carboxy-5-ureidoimidazoline (OHCU) decarboxylase. Two alternatively spliced versions of the transcript give rise to a longer peroxisomally-targeted protein (AT5G58220.1 (called TTL1-)) a…	peroxisome	peroxisome:17951448	cytoskeleton:24134884;mitochondrion:21841088;mitochondrion:27943495;peroxisome:17951448;peroxisome:18931141;peroxisome:19329564
AT5G58230	Transducin/WD40 repeat-like superfamily protein;Encodes a WD-40 repeat containing protein that functions in chromatin assembly as part of the CAF1 and FIE complex. Mutants exhibit parthenogenetic development that includes proliferation of unfertilized endosperm and embryos. In heterozygous plants 50% of embryos abort. Of the aborted embryos the early aborted class are homozygous and the later abo…	nucleus		cytoskeleton:24134884;nucleus:23396599;plastid:15028209
AT5G61220	LYR family of Fe/S cluster biogenesis protein;	mitochondrion		mitochondrion:27943495
AT5G61810	Mitochondrial substrate carrier family protein;	peroxisome		mitochondrion:27943495
AT5G62270	;	mitochondrion		mitochondrion:27943495
AT5G64050	glutamate tRNA synthetase;Glutamate-tRNA ligase. Targeted to mitochondria and chloroplast. Its inactivation causes developmental arrest of chloroplasts and mitochondria in Nicotiana benthamiana.	mitochondrion,plastid	mitochondrion:16107332;mitochondrion:16251277;plastid:16107332;plastid:16251277	golgi:25900983;golgi:25900983;golgi:25900983;golgi:25900983;mitochondrion:27943495;plastid:20423899;plastid:18431481;plastid:20061580;plastid:24361574;plastid:24872594;vacuole:25900983
AT5G65760	Serine carboxypeptidase S28 family protein;	extracellular		extracellular:26572690;extracellular:28155257;plastid:15028209;vacuole:15539469
AT5G66860	Ribosomal protein L25/Gln-tRNA synthetase, anti-codon-binding domain;	mitochondrion		extracellular:26572690;mitochondrion:14671022;mitochondrion:21841088;mitochondrion:27943495
AT5G67100	DNA-directed DNA polymerases;Encodes the putative catalytic subunit of the DNA polymerase alpha. Interacts with genes involved in chromatin-mediated cellular memory. ICU2 genetically interacts with TERMINAL FLOWER2, the ortholog of HETEROCHROMATIN PROTEIN1 of animals and yeasts, and with the Polycomb group (PcG) gene CURLY LEAF. A number of regulatory genes were derepressed in the icu2-1 mutant, …	nucleus		plastid:24872594
ATCG00130	ATPase, F0 complex, subunit B/B', bacterial/chloroplast;ATPase F subunit.	plastid		golgi:25900983;golgi:25900983;golgi:25900983;mitochondrion:27943495;plasma membrane:19334764;plasma membrane:22215637;plastid:14729914;plastid:15028209;plastid:15322131;plastid:21531424;plastid:23549413;plastid:23851315;plastid:23390424;plastid:24872594;plastid:18431481;plastid:18633119;plastid:20061580;plastid:23667806;plastid:24872594
ATMG00090	structural constituent of ribosome;protein binding;ribosomal protein S3	mitochondrion		mitochondrion:21841088;mitochondrion:27943495
AT1G08480	;	mitochondrion	plasma membrane,plastid,mitochondrion,cytosol,nucleus
AT1G20510	OPC-8:0 CoA ligase1;	peroxisome	mitochondrion,peroxisome,cytosol,plastid	peroxisome:16963437
AT1G33780	Protein of unknown function (DUF179);	plastid	cytosol,plastid,nucleus
AT1G51390	NFU domain protein 5;Encodes a protein containing the NFU domain that may be involved in iron-sulfur cluster assembly. Part of a five member gene family, more closely related to NFU4 than to NFU1,2, and 3. Targeted to the mitochondrion.	mitochondrion	mitochondrion,plastid,extracellular,nucleus	mitochondrion:12553879
AT1G52760	lysophospholipase 2;Encodes a lysophospholipase 2 (LysoPL2). Involved in tolerance to cadmium-induced oxidative stress. Binds Acyl-CoA-binding protein 2 (ACBP2).	mitochondrion	golgi,plastid,mitochondrion,cytosol,extracellular,endoplasmic reticulum,nucleus
AT1G55890	Tetratricopeptide repeat (TPR)-like superfamily protein;	mitochondrion	mitochondrion,cytosol,plastid
AT1G65260	plastid transcriptionally active 4;Encodes a protein required for thylakoid membrane formation.	plastid	mitochondrion,plastid,nucleus	plastid:27208228;plastid:15210715
AT1G67350	;	mitochondrion	plasma membrane,plastid,mitochondrion,cytosol,extracellular,nucleus
AT1G70190	Ribosomal protein L7/L12, oligomerisation;Ribosomal protein L7/L12, C-terminal/adaptor protein ClpS-like;	mitochondrion	mitochondrion,cytosol,plastid,nucleus
AT1G71730	;	mitochondrion	mitochondrion,plastid,nucleus
AT1G72750	translocase inner membrane subunit 23-2;	mitochondrion	plasma membrane,plastid,mitochondrion,cytosol,extracellular,nucleus	mitochondrion:17098851
AT1G74230	glycine-rich RNA-binding protein 5;encodes a glycine-rich RNA binding protein.	mitochondrion	golgi,plastid,mitochondrion,extracellular,endoplasmic reticulum,nucleus
AT1G79230	mercaptopyruvate sulfurtransferase 1;encodes a sulfurtransferase/rhodaneses, which belongs to a group of enzymes widely distributed in all three phyla that catalyze the transfer of sulfur from a donor to a thiophilic acceptor substrate. The protein and transcript levels are NOT affected by senescence or exogenous cyanide, suggesting that sulfurtransferases are involved in cyanide detoxification.	mitochondrion,plastid	mitochondrion,cytosol,plastid,nucleus	mitochondrion:10734224;mitochondrion:10951223;mitochondrion:15181206
AT2G03690	coenzyme Q biosynthesis Coq4 family protein / ubiquinone biosynthesis Coq4 family protein;Ubiquinone biosynthesis protein COQ4 homolog.	mitochondrion	mitochondrion,cytosol,plastid
AT2G18960	H(+)-ATPase 1;Encodes a plasma membrane proton ATPase. Mutants have a reduced ability to close their stomata in response to drought and are affected in stomatal but not seed responsiveness to ABA.	plasma membrane	golgi,plasma membrane,plastid,mitochondrion,peroxisome,cytosol,extracellular,endoplasmic reticulum,nucleus	plasma membrane:21617383;plasma membrane:23896897;plasma membrane:24163289;plasma membrane:24397334
AT2G20800	NAD(P)H dehydrogenase B4;	mitochondrion	mitochondrion,cytosol,plastid	mitochondrion:18703057;mitochondrion:23841539
AT2G23370	;	mitochondrion	mitochondrion,cytosol,plastid
AT2G27730	copper ion binding;	mitochondrion	mitochondrion,cytosol,plastid	mitochondrion:15141064;nucleus:15496452;unclear:15496452
AT2G38940	phosphate transporter 1;4;Encodes Pht1;4, a member of the Pht1 family of phosphate transporters which include: Pht1;1/At5g43350, Pht1;2/At5g43370, Pht1;3/At5g43360, Pht1;4/At2g38940, Pht1;5/At2g32830, Pht1;6/At5g43340, Pht1;7/At3g54700, Pht1;8/At1g20860, Pht1;9/At1g76430 (Plant Journal 2002, 31:341).	plasma membrane	golgi,plasma membrane,plastid,mitochondrion,cytosol,extracellular,endoplasmic reticulum	plasma membrane:24122828
AT2G43030	Ribosomal protein L3 family protein;	plastid	mitochondrion,cytosol,plasma membrane,plastid
AT2G47110	ubiquitin 6;polyubiquitin gene	cytosol	mitochondrion,cytosol,nucleus
AT2G47380	Cytochrome c oxidase subunit Vc family protein;	mitochondrion	golgi,plastid,mitochondrion,cytosol,extracellular,endoplasmic reticulum,nucleus
AT3G03590	SWIB/MDM2 domain superfamily protein;	mitochondrion	mitochondrion,plastid,nucleus	plastid:22797472
AT3G03600	ribosomal protein S2;Structural component of the mitochondrial ribosome small subunit	mitochondrion	mitochondrion,cytosol,plasma membrane,plastid
AT3G17970	translocon at the outer membrane of chloroplasts 64-III;Integral chloroplast outer membrane protein.	plastid	golgi,mitochondrion,cytosol,extracellular,endoplasmic reticulum,nucleus	mitochondrion:12954611;plastid:14741350;plastid:21515817
AT3G20970	NFU domain protein 4;Encodes a protein containing the NFU domain that may be involved in iron-sulfur cluster assembly. Part of a five member gene family, more closely related to NFU5 than to NFU1,2, and 3. Targeted to the mitochondrion.	mitochondrion	mitochondrion,plastid,extracellular,nucleus	mitochondrion:12553879
AT3G22330	putative mitochondrial RNA helicase 2;DEAD-box protein required for efficient group II intron splicing in mitochondria.	mitochondrion	plasma membrane,plastid,mitochondrion,extracellular,nucleus
AT3G48110	glycine-tRNA ligases;glycine-tRNA ligase	plastid	golgi,plasma membrane,plastid,mitochondrion,cytosol,extracellular,endoplasmic reticulum	mitochondrion:11278923;plastid:11278923
AT3G48680	gamma carbonic anhydrase-like 2;Encodes a mitochondrial gamma carbonic anhydrase-like protein. Component of the NADH dehydrogenase complex.	mitochondrion	mitochondrion,extracellular,plasma membrane,plastid	mitochondrion:22991283
AT3G49560	Mitochondrial import inner membrane translocase subunit Tim17/Tim22/Tim23 family protein;	plastid	golgi,plasma membrane,plastid,mitochondrion,cytosol,nucleus	plastid:17098851;plastid:28544763
AT3G51830	SAC domain-containing protein 8;putative transmembrane protein G5p (AtG5) mRNA, complete	mitochondrion	golgi,plasma membrane,plastid,mitochondrion,cytosol,extracellular,endoplasmic reticulum,nucleus	endoplasmic reticulum:12713536
AT3G58840	Tropomyosin-related;	mitochondrion	mitochondrion,cytosol,plastid,nucleus
AT4G01100	adenine nucleotide transporter 1;	mitochondrion	golgi,mitochondrion,peroxisome,cytosol,extracellular,endoplasmic reticulum,nucleus
AT4G01660	ABC transporter 1;Encodes an ABC1-like protein, member of the ATH subfamily; putative ABC transporter; isolated by functional complementation of a yeast abc1 mutant	mitochondrion	golgi,plastid,mitochondrion,cytosol,extracellular,endoplasmic reticulum,nucleus
AT4G03080	BRI1 suppressor 1 (BSU1)-like 1;	nucleus	mitochondrion,cytosol,endoplasmic reticulum,nucleus
AT4G05400	copper ion binding;	mitochondrion	mitochondrion,cytosol,plastid,nucleus
AT4G09730	RH39;Encodes RH39, a DEAD-box protein involved in the introduction of the hidden break into the 23S rRNA in the chloroplasts. Recombinant RH39 binds to the 23S rRNA in a segment adjacent to the stem-loop creating the hidden break target loop in a sequence-dependent manner. Has ATP-hydrolyzing activity at a Kcat of 5.3 /min in the presence of rRNA sequence. Mutants have drastically reduced level o…	plastid	golgi,plastid,mitochondrion,extracellular,endoplasmic reticulum,nucleus
AT4G14070	acyl-activating enzyme 15;Plastidic acyl activating enzyme involved in the elongation of exogenous medium-chain fatty acids to 16- and 18-carbon fatty acids.	plastid	plasma membrane,plastid,vacuole,mitochondrion,peroxisome
AT4G21710	DNA-directed RNA polymerase family protein;Encodes the unique second-largest subunit of DNA-dependent RNA polymerase II; the ortholog of budding yeast RPB2 and a homolog of the E. coli RNA polymerase beta subunit.	nucleus	mitochondrion,cytosol,nucleus
AT4G23620	Ribosomal protein L25/Gln-tRNA synthetase, anti-codon-binding domain;	mitochondrion	mitochondrion,cytosol,plastid
AT4G30190	H(+)-ATPase 2;belongs to the P-type ATPase superfamily of cation-transporting ATPases, pumps protons out of the cell, generating a proton gradient that drives the active transport of nutrients by proton symport. has two autoinhibitory regions within the C-terminal dom	plasma membrane	golgi,plasma membrane,plastid,mitochondrion,peroxisome,cytosol,extracellular,endoplasmic reticulum,nucleus	plasma membrane:11226186;plasma membrane:15722471;plasma membrane:15923333;plasma membrane:16831869
AT4G31460	Ribosomal L28 family;	mitochondrion	plastid,mitochondrion,peroxisome,cytosol,nucleus
AT4G34700	LYR family of Fe/S cluster biogenesis protein;	mitochondrion	mitochondrion,cytosol,plastid,nucleus
AT4G39460	S-adenosylmethionine carrier 1;Encodes a plastid metabolite transporter required for the import of S-Adenosylmethionine from the cytosol. Impaired function of SAMT1 led to decreased accumulation of prenyllipids and mainly affected the chlorophyll pathway.	plastid	mitochondrion,peroxisome,cytosol,plastid	mitochondrion:16950860;plastid:17098813
AT4G39850	peroxisomal ABC transporter 1;Encodes a peroxisomal protein of the ATP binding cassette (ABC) transporter class (PMP subfamily) with significant identity to the human X-linked adrenoleukodystrophy protein (ALDP). The gene product promotes germination and represses embryo dormancy. ABI3, ABA1, FUS3 and LEC1 are epistatic to this gene. Mutants accumulate fatty acyl CoA suggesting a defect in uptake…	peroxisome	mitochondrion,peroxisome,plasma membrane,plastid
AT5G08300	Succinyl-CoA ligase, alpha subunit;	mitochondrion	mitochondrion,cytosol,plastid
AT5G08530	51 kDa subunit of complex I;	mitochondrion	mitochondrion,cytosol,extracellular,plastid
AT5G08540	;	plastid	plastid,mitochondrion,peroxisome,cytosol,endoplasmic reticulum,nucleus
AT5G15640	Mitochondrial substrate carrier family protein;	mitochondrion	mitochondrion,peroxisome,cytosol,nucleus
AT5G26860	lon protease 1;Encodes a member of the Lon protease-like proteins (Lon1/At5g26860, Lon2/At5g47040, Lon3/At3g05780, Lon4/At3g05790). Lon is a multifunctional ATP-dependent protease which exists in bacteria, archaea and within organelles in eukaryotic cells. Lon proteases are responsible for the degradation of abnormal, damaged and unstable proteins.	mitochondrion	mitochondrion,cytosol,plastid	mitochondrion:17478548;mitochondrion:19076295;plastid:in house
AT5G27540	MIRO-related GTP-ase 1;Encodes a protein with similarity to GTPases that is localized to the mitochondrion. Involved in embryogenesis, pollen tube growth and required for mitochondrial development.	mitochondrion	plastid,mitochondrion,peroxisome,cytosol,nucleus
AT5G39410	Saccharopine dehydrogenase ;	mitochondrion	plasma membrane,plastid,mitochondrion,cytosol,nucleus
AT5G39840	ATP-dependent RNA helicase, mitochondrial, putative;	mitochondrion	mitochondrion,cytosol,plastid,nucleus
AT5G46800	Mitochondrial substrate carrier family protein;Seedling lethal mutation; Mitochondrial Carnitine Acyl Carrier-Like Protein	mitochondrion	mitochondrion,peroxisome,cytosol,nucleus
AT5G53070	Ribosomal protein L9/RNase H1;	mitochondrion	mitochondrion,cytosol,plastid
AT5G55140	ribosomal protein L30 family protein;	mitochondrion	mitochondrion,cytosol,plastid,nucleus
AT5G58370	P-loop containing nucleoside triphosphate hydrolases superfamily protein;	mitochondrion	mitochondrion,plastid,nucleus
AT5G63380	AMP-dependent synthetase and ligase family protein;Encodes a peroxisomal protein involved in the activation of fatty acids through esterification with CoA. At5g63380 preferentially activates fatty acids with increased chain length (C9:0 to C8:0) and thus shares characteristics with long-chain fatty acyl-CoA synthases. Also able to catalyze the conversion of OPDA to its CoA ester and is therefore …	peroxisome	mitochondrion,peroxisome,cytosol,plastid	peroxisome:15677481
AT5G64400	;	mitochondrion	mitochondrion,plastid,nucleus
AT5G65560	Pentatricopeptide repeat (PPR) superfamily protein;	mitochondrion	mitochondrion,cytosol,plastid,nucleus
AT5G67590	NADH-ubiquinone oxidoreductase-related;Mutant leaves have a reduced capacity for cold acclimation, appear water-soaked, leak electrolytes, and accumulate reactive oxygen species constitutively. Encode a protein with high similarity to the 18-kD Fe-S subunit of complex I (NADH dehydrogenase, EC 1.6.5.3) in the mitochondrial electron transfer chain.	mitochondrion	mitochondrion,cytosol,plastid,nucleus	mitochondrion:12084824;mitochondrion:21896887

## Sheet: Sup Tab 6b
Supplemental Table S6B: Localisation study with SUBA4 of proteins with HS induced downregulated in the cytosol inhibited by LaCl3 (FDR 0.05)
Examples of proteins previously described in a PCD or stress contexted, highlighted in red.
												Summary
Protein Properties		Location Consensus	Location Experiments									Location	Count
Gene	Description	Location SUBAcon	Location GFP	Location Mass Spec								Cytosol	11
AT3G44310.1	nitrilase 1;Mutants are resistant to indole-3-acetonitrile (IAN). NIT1 catalyzes the terminal activation step in indole-acetic acid biosynthesis. Predominantly expressed isoform of nitrilase isoenzyme family. Aggregation of NIT1 in cells directly abutting wound sites is one of the earliest events associated with wound and herbicide-induced cell death. The protein undergoes thiolation following tr…	cytosol	cytoskeleton:23437871;cytosol:15796778;nucleus:15796778;nucleus:23437871	cytosol:21166475;cytosol:25587034;extracellular:26572690;golgi:25900983;golgi:25900983;golgi:25900983;golgi:25900983;golgi:25900983;mitochondrion:27122571;nucleus:23396599;plasma membrane:25641898;plasma membrane:15574830;plasma membrane:17317660;plasma membrane:19334764;plasma membrane:22215637;plasma membrane:26781341;plastid:18431481;plastid:20423899;plastid:24361574								ER	7
AT5G47010.1	RNA helicase, putative;Required for nonsense-mediated mRNA decay. Involved in RNA interference. lba1 mutants has reduced sugar-induced expression of Atb- amylase, is hypersensitive to glucose and abscisic acid and resistant to mannose, and shows early flowering, short day-sensitive growth, and seed germination phenotypes.	cytosol		cytoskeleton:24134884;golgi:25900983;plasma membrane:17317660;plasma membrane:19334764;plasma membrane:21433285								Extracellular	2
AT5G62390.1	BCL-2-associated athanogene 7;A member of Arabidopsis BAG (Bcl-2-associated athanogene) proteins, plant homologs of mammalian regulators of apoptosis. Plant BAG proteins are multi-functional and remarkably similar to their animal counterparts, as they regulate apoptotic-like processes ranging from pathogen attack, to abiotic stress, to plant development. Localized to the ER. Necessary for the pro…	endoplasmic reticulum		endoplasmic reticulum:16618929;endoplasmic reticulum:22923678;golgi:25900983;golgi:25900983;golgi:25900983;golgi:25900983;plasma membrane:25641898;plasma membrane:15574830;plasma membrane:17317660;plasma membrane:17644812;plasma membrane:19334764;plasma membrane:21433285;plasma membrane:22215637;plasma membrane:26781341;vacuole:25900983								Golgi	2
AT1G52760.1	lysophospholipase 2;Encodes a lysophospholipase 2 (LysoPL2). Involved in tolerance to cadmium-induced oxidative stress. Binds Acyl-CoA-binding protein 2 (ACBP2).	mitochondrion		extracellular:26572690;golgi:25900983;golgi:25900983;mitochondrion:21841088;mitochondrion:27943495;mitochondrion:21896887;plasma membrane:19334764;plasma membrane:26781341								Nucleus	4
AT5G26860.1	lon protease 1;Encodes a member of the Lon protease-like proteins (Lon1/At5g26860, Lon2/At5g47040, Lon3/At3g05780, Lon4/At3g05790). Lon is a multifunctional ATP-dependent protease which exists in bacteria, archaea and within organelles in eukaryotic cells. Lon proteases are responsible for the degradation of abnormal, damaged and unstable proteins.	mitochondrion	mitochondrion:17478548;mitochondrion:19076295;plastid:in house	golgi:25900983;mitochondrion:14671022;mitochondrion:17137349;mitochondrion:19688752;mitochondrion:21472856;mitochondrion:21841088;mitochondrion:22923678;mitochondrion:24727099;mitochondrion:27943495;plasma membrane:21433285								Plasmamembrane	8
AT5G67590.1	NADH-ubiquinone oxidoreductase-related;Mutant leaves have a reduced capacity for cold acclimation, appear water-soaked, leak electrolytes, and accumulate reactive oxygen species constitutively. Encode a protein with high similarity to the 18-kD Fe-S subunit of complex I (NADH dehydrogenase, EC 1.6.5.3) in the mitochondrial electron transfer chain.	mitochondrion	mitochondrion:12084824;mitochondrion:21896887	extracellular:26572690;mitochondrion:12837548;mitochondrion:14671022;mitochondrion:18189341;mitochondrion:21841088;mitochondrion:22923678;mitochondrion:23761796;mitochondrion:27122571;mitochondrion:27943495;mitochondrion:21896887								Plastid	1
AT1G48410.1	Stabilizer of iron transporter SufD / Polynucleotidyl transferase;Encodes an RNA Slicer that selectively recruits microRNAs and siRNAs. There is currently no evidence that AGO1 Slicer is in a high molecular weight RNA-induced silencing complex (RISC). Mutants are defective in post-transcriptional gene silencing and have pleiotropic developmental and morphological defects. Through its action on th…	nucleus		cytoskeleton:24134884;cytosol:18433157;extracellular:26572690;nucleus:18433157;plasma membrane:19334764								Multiple	4
AT1G59870.1	ABC-2 and Plant PDR ABC-type transporter family protein;ATP binding cassette transporter. Localized to the plasma membrane in uninfected cells. In infected leaves, the protein concentrated at infection sites. Contributes to nonhost resistance to inappropriate pathogens that enter by direct penetration in a salicylic acid–dependent manner. Required for mlo resistance. Has Cd transporter activity (…	plasma membrane	plasma membrane:16473969;plasma membrane:28434950	golgi:25900983;golgi:25900983;golgi:25900983;golgi:25900983;golgi:21826108;golgi:25900983;mitochondrion:15276431;plasma membrane:25641898;plasma membrane:14506206;plasma membrane:15308754;plasma membrane:15574830;plasma membrane:16618929;plasma membrane:16635983;plasma membrane:17317660;plasma membrane:17644812;plasma membrane:19334764;plasma membrane:21433285;plasma membrane:22215637;plasma memb…								Total	39
AT2G18960.1	H(+)-ATPase 1;Encodes a plasma membrane proton ATPase. Mutants have a reduced ability to close their stomata in response to drought and are affected in stomatal but not seed responsiveness to ABA.	plasma membrane	plasma membrane:21617383;plasma membrane:23896897;plasma membrane:24163289;plasma membrane:24397334	extracellular:26572690;golgi:22430844;golgi:25900983;golgi:25900983;golgi:25900983;golgi:25900983;golgi:21826108;golgi:25900983;mitochondrion:27122571;mitochondrion:27943495;plasma membrane:25641898;plasma membrane:14506206;plasma membrane:15060130;plasma membrane:15295017;plasma membrane:15308754;plasma membrane:15574830;plasma membrane:16618929;plasma membrane:16635983;plasma membrane:17317660;…
AT3G20320.1	trigalactosyldiacylglycerol2;Encodes a permease-like component of an ABC transporter involved in lipid transfer from ER to chloroplast. A phosphatidic acid-binding protein with a predicted mycobacterial cell entry domain. It is tethered to the inner chloroplast envelope membrane facing the outer envelope membrane. Presumed bacterial orthologs of TGD1 and TGD2 in Gram-negative bacteria are typical…	plastid		cytosol:28611809;golgi:25900983;plasma membrane:25641898;plasma membrane:19334764;plastid:12766230;plastid:12938931;plastid:21531424;plastid:22923678;plastid:18431481;plastid:20061580;plastid:24872594
AT1G04270.1	cytosolic ribosomal protein S15;Encodes cytosolic ribosomal protein S15.	cytosol		cytosol:21166475;cytosol:15734919;cytosol:15821981;extracellular:26572690;golgi:25900983;golgi:25900983;golgi:25900983;golgi:25900983;golgi:25900983;mitochondrion:21841088;nucleus:23396599;plasma membrane:17317660;plasma membrane:19334764;plasma membrane:22215637;plasma membrane:22318864;plasma membrane:26781341;plastid:20061580;vacuole:17151019;vacuole:23903016;vacuole:25900983
AT1G25350.1	glutamine-tRNA ligase, putative / glutaminyl-tRNA synthetase, putative / GlnRS, putative;	cytosol		cytosol:21166475;mitochondrion:27122571
AT1G75950.1	S phase kinase-associated protein 1;SKP1 is core component of the SCF family of E3 ubiquitin ligases and serves to tether the rest of the complex to an F-box protein, which provides specificity in binding to ubiquitin ligase substrate proteins. Predominately expressed from leptotene to pachytene. Negatively regulates recombination. Interacts with P0, a silencing suppressor protein encoded by pole…	cytosol	cytosol:16283376;cytosol:23226441;nucleus:16283376;nucleus:16333572;nucleus:23226441	cytoskeleton:24134884;cytosol:21166475;extracellular:26572690;plasma membrane:17317660
AT2G36160.1	Ribosomal protein S11 family protein;	cytosol		cytosol:17934214;cytosol:21166475;cytosol:15734919;cytosol:22522809;extracellular:26572690;golgi:25900983;golgi:25900983;golgi:25900983;golgi:25900983;golgi:25900983;nucleus:23396599;plasma membrane:25641898;plasma membrane:17317660;plasma membrane:19334764;plasma membrane:22318864;plasma membrane:26781341;plastid:15028209;plastid:24872594;plastid:20061580;vacuole:17151019;vacuole:23903016;vacuol…
AT2G47110.1	ubiquitin 6;polyubiquitin gene	cytosol		cytosol:22522809;cytosol:26232565;extracellular:26572690;golgi:22430844;golgi:25900983;golgi:25900983;plasma membrane:19334764;plasma membrane:22215637;plastid:24361574;vacuole:25900983
AT3G11250.1	Ribosomal protein L10 family protein;	cytosol		cytosol:15734919;cytosol:15821981;cytosol:22522809;extracellular:26572690;plasma membrane:19334764;vacuole:18686298
AT3G53890.1	Ribosomal protein S21e ;	cytosol		cytosol:15734919;extracellular:26572690
AT4G34660.1	SH3 domain-containing protein;	cytosol	cytosol:24249832	cytosol:21166475;golgi:25900983;golgi:25900983;plasma membrane:26781341
AT5G26667.1	P-loop containing nucleoside triphosphate hydrolases superfamily protein;encodes a uridine 5'-monophosphate (UMP)/cytidine 5'-monophosphate (CMP) kinase.	cytosol		cytosol:21166475;extracellular:26572690;golgi:25900983;golgi:25900983;plasma membrane:22215637
AT5G44720.1	Molybdenum cofactor sulfurase family protein;	cytosol		extracellular:26572690
AT1G08450.1	calreticulin 3;Encodes one of three Arabidopsis calreticulins. In CRT-deficient mouse fibroblasts, this protein restores ER Ca2+ levels. Non-receptor component required for EFR-mediated immunity. Mutants show de-repressed anthocyanin accumulation in the presence of elf18, and EFR accumulation and signalling.	endoplasmic reticulum	endoplasmic reticulum:18931141	endoplasmic reticulum:22923678;endoplasmic reticulum:24393051;extracellular:16356755;mitochondrion:27122571;nucleus:23396599;plasma membrane:15574830;plasma membrane:22215637;plasma membrane:26781341
AT5G48580.1	FK506- and rapamycin-binding protein 15 kD-2;immunophilin (FKBP15-2)	endoplasmic reticulum		cytosol:21166475;endoplasmic reticulum:22923678;extracellular:26572690;golgi:22430844;plasma membrane:22215637;plasma membrane:26781341
AT5G56650.1	IAA-leucine resistant (ILR)-like 1;encodes a protein similar to IAA conjugate hydrolases. Enzyme assays with purified GST-tagged protein shows some activity in vitro but too low to be physiologically significant.	endoplasmic reticulum		golgi:22430844;plastid:24872594
AT5G63840.1	Glycosyl hydrolases family 31 protein;radial swelling mutant shown to be specifically impaired in cellulose production. Encodes the alpha-subunit of a glucosidase II enzyme.	endoplasmic reticulum	endoplasmic reticulum:in house	endoplasmic reticulum:16618929;endoplasmic reticulum:22923678;mitochondrion:27122571;plasma membrane:21433285;plasma membrane:26781341;plastid:15028209
AT1G09870.1	histidine acid phosphatase family protein;	extracellular		endoplasmic reticulum:22923678;extracellular:15694452;extracellular:16356755;plasma membrane:19334764;plasma membrane:22215637;vacuole:17151019
AT1G68560.1	alpha-xylosidase 1;Encodes a bifunctional alpha-l-arabinofuranosidase/beta-d-xylosidase that belongs to family 3 of glycoside hydrolases.	extracellular		extracellular:15593128;extracellular:16287169;extracellular:16356755;extracellular:16729891;extracellular:19825673;extracellular:21109274;extracellular:26572690;extracellular:28155257;extracellular:24393051;extracellular:25852701;golgi:25900983;golgi:25900983;golgi:25900983;golgi:25900983;golgi:25900983;plasma membrane:19334764;plasma membrane:20843791;plasma membrane:21433285;plasma membrane:223…
AT1G78060.1	Glycosyl hydrolase family protein;	extracellular		extracellular:15593128;extracellular:16287169;extracellular:16356755;extracellular:26572690;extracellular:28155257;plasma membrane:19334764;plastid:18431481
AT1G78830.1	Curculin-like (mannose-binding) lectin family protein;	extracellular		extracellular:14595688;extracellular:15593128;extracellular:16287169;extracellular:16356755;extracellular:16729891;extracellular:21109274;extracellular:24393051;extracellular:26572690;extracellular:28155257;extracellular:25852701;golgi:22430844;golgi:25900983;mitochondrion:27122571;plasma membrane:17317660;plasma membrane:20843791;plasma membrane:22318864
AT3G45960.1	expansin-like A3;member of EXPANSIN-LIKE. Naming convention from the Expansin Working Group (Kende et al, 2004. Plant Mol Bio)	extracellular		cytosol:21166475;extracellular:16287169;extracellular:16356755;extracellular:16729891;extracellular:26572690
AT3G45970.1	expansin-like A1;member of EXPANSIN-LIKE. Naming convention from the Expansin Working Group (Kende et al, 2004. Plant Mol Bio)	extracellular		cytoskeleton:24134884;extracellular:14595688;extracellular:16287169;extracellular:16356755;extracellular:16729891;extracellular:18998720;extracellular:21109274;extracellular:25805245;extracellular:26572690;extracellular:28155257;extracellular:28003327;golgi:22430844;plasma membrane:21433285
AT5G25460.1	Protein of unknown function, DUF642;	extracellular		extracellular:16287169;extracellular:16356755;extracellular:16729891;extracellular:21109274;extracellular:24393051;extracellular:26572690;extracellular:28155257;extracellular:25852701;golgi:25900983;golgi:25900983;golgi:25900983;golgi:25900983;golgi:25900983;nucleus:27177187;plasma membrane:21433285;vacuole:25900983
AT5G44130.1	FASCICLIN-like arabinogalactan protein 13 precursor;	extracellular,plasma membrane		extracellular:16287169;extracellular:28155257;golgi:22430844;plasma membrane:25641898;plasma membrane:14506206;plasma membrane:14517339;plasma membrane:16602701;plasma membrane:16635983;plasma membrane:17317660;plasma membrane:17644812;plasma membrane:20843791;plasma membrane:21433285;plasma membrane:22215637;plasma membrane:22318864;plasma membrane:26781341
AT1G51540.1	Galactose oxidase/kelch repeat superfamily protein;	golgi		golgi:16618929;golgi:22923678
AT2G44610.1	Ras-related small GTP-binding family protein;Encodes a GTP-binding protein with similarity to yeast YPT6 . RAB6 can complement the yeast YTP mutant.	golgi	cytosol:19454595;golgi:19454595	cytosol:21166475;extracellular:26572690;golgi:22923678;golgi:25900983;golgi:25122472;golgi:25900983;golgi:25900983;golgi:25900983;golgi:21826108;golgi:25900983;mitochondrion:27943495;plasma membrane:25641898;plasma membrane:17644812;plasma membrane:19334764;plasma membrane:22215637;plasma membrane:26781341;plastid:20061580;vacuole:17151019;vacuole:25900983
AT3G62720.1	xylosyltransferase 1;Encodes a protein with xylosyltransferase activity, which is specific for UDP-xylose as donor substrate and for oligosaccharides with a degree of polymerization >4. Although the enzyme utilizes either cellopentaose or cellohexaose, its activity is four-fold higher with cellohexaose as an acceptor compared to cellopentaose. The enzyme is able to add several xylosyl residues to…	golgi	golgi:21143678	golgi:22430844;golgi:22923678;golgi:25122472
AT4G35860.1	GTP-binding 2;GTP-binding protein ATGB2	golgi		extracellular:26572690;golgi:25900983;golgi:25900983;golgi:25900983;golgi:25900983;golgi:21826108;golgi:25900983;mitochondrion:21896887;plasma membrane:22215637;plasma membrane:22318864;plasma membrane:26781341;plastid:18431481
AT1G02130.1	RAS 5;Belongs to the Rab1 GTPase subfamily. This small GTP-binding protein is required in ER to Golgi transportation.	golgi,endoplasmic reticulum	endoplasmic reticulum:11090219;golgi:11090219	golgi:25900983;golgi:25900983;golgi:25900983;golgi:25900983;golgi:21826108;golgi:25900983;plasma membrane:25641898;plasma membrane:15060130;plasma membrane:26781341;vacuole:15539469;vacuole:23903016;vacuole:25900983
AT1G08480.1	;	mitochondrion		mitochondrion:12970493;mitochondrion:14671022;mitochondrion:15276431;mitochondrion:15604729;mitochondrion:18385124;mitochondrion:21472856;mitochondrion:21841088;mitochondrion:22923678;mitochondrion:27122571;mitochondrion:27943495;plasma membrane:15574830;plasma membrane:19334764;unclear:16618929;vacuole:17151019
AT1G51390.1	NFU domain protein 5;Encodes a protein containing the NFU domain that may be involved in iron-sulfur cluster assembly. Part of a five member gene family, more closely related to NFU4 than to NFU1,2, and 3. Targeted to the mitochondrion.	mitochondrion	mitochondrion:12553879	mitochondrion:23444301;mitochondrion:27122571;mitochondrion:27943495;mitochondrion:23444301
AT1G55890.1	Tetratricopeptide repeat (TPR)-like superfamily protein;	mitochondrion		mitochondrion:14671022;mitochondrion:21296373;mitochondrion:21841088;mitochondrion:27943495;plasma membrane:19334764
AT1G67350.1	;	mitochondrion		mitochondrion:12970493;mitochondrion:18189341;mitochondrion:20197505;mitochondrion:21841088;mitochondrion:23761796;mitochondrion:27122571;mitochondrion:27943495
AT1G70190.1	Ribosomal protein L7/L12, oligomerisation;Ribosomal protein L7/L12, C-terminal/adaptor protein ClpS-like;	mitochondrion		mitochondrion:14671022;mitochondrion:27943495
AT1G71730.1	;	mitochondrion
AT1G72750.1	translocase inner membrane subunit 23-2;	mitochondrion	mitochondrion:17098851	golgi:25900983;golgi:25900983;golgi:25900983;golgi:25900983;mitochondrion:14671022;mitochondrion:14730085;mitochondrion:21841088;mitochondrion:22923678;mitochondrion:23761796;mitochondrion:27122571;mitochondrion:27943495;plasma membrane:19334764
AT1G74230.1	glycine-rich RNA-binding protein 5;encodes a glycine-rich RNA binding protein.	mitochondrion		mitochondrion:17137349;mitochondrion:18385124;mitochondrion:19688752;mitochondrion:21472856;mitochondrion:21841088;mitochondrion:27943495
AT2G03690.1	coenzyme Q biosynthesis Coq4 family protein / ubiquinone biosynthesis Coq4 family protein;Ubiquinone biosynthesis protein COQ4 homolog.	mitochondrion		mitochondrion:27943495;plasma membrane:19334764
AT2G20800.1	NAD(P)H dehydrogenase B4;	mitochondrion	mitochondrion:18703057;mitochondrion:23841539	mitochondrion:14671022;mitochondrion:15276431;mitochondrion:15295017;mitochondrion:21841088;mitochondrion:22923678;mitochondrion:21896887;peroxisome:18931141;plasma membrane:21433285;unclear:16618929
AT2G23370.1	;	mitochondrion		mitochondrion:14671022;mitochondrion:27943495
AT2G27730.1	copper ion binding;	mitochondrion	mitochondrion:15141064;nucleus:15496452;unclear:15496452	extracellular:26572690;golgi:25900983;golgi:25900983;golgi:25900983;golgi:25900983;golgi:25900983;mitochondrion:11743114;mitochondrion:11870776;mitochondrion:12837548;mitochondrion:14671022;mitochondrion:15276431;mitochondrion:17406791;mitochondrion:18189341;mitochondrion:18385124;mitochondrion:20197505;mitochondrion:21472856;mitochondrion:21841088;mitochondrion:22923678;mitochondrion:23761796;mi…
AT2G47380.1	Cytochrome c oxidase subunit Vc family protein;	mitochondrion		mitochondrion:14671022;mitochondrion:15604729;mitochondrion:21472856;mitochondrion:21841088;mitochondrion:27943495
AT3G03590.1	SWIB/MDM2 domain superfamily protein;	mitochondrion	plastid:22797472	mitochondrion:21841088;plastid:26987276
AT3G03600.1	ribosomal protein S2;Structural component of the mitochondrial ribosome small subunit	mitochondrion		mitochondrion:27943495
AT3G20970.1	NFU domain protein 4;Encodes a protein containing the NFU domain that may be involved in iron-sulfur cluster assembly. Part of a five member gene family, more closely related to NFU5 than to NFU1,2, and 3. Targeted to the mitochondrion.	mitochondrion	mitochondrion:12553879	mitochondrion:21841088;mitochondrion:23444301;mitochondrion:27943495;mitochondrion:23444301
AT3G22330.1	putative mitochondrial RNA helicase 2;DEAD-box protein required for efficient group II intron splicing in mitochondria.	mitochondrion		golgi:25900983;golgi:25900983;golgi:25900983;mitochondrion:11743115;mitochondrion:14671022;mitochondrion:21472856;mitochondrion:21841088;mitochondrion:27943495;nucleus:15496452;plasma membrane:19334764;plasma membrane:21433285;plastid:23851315;plastid:23667806
AT3G48680.1	gamma carbonic anhydrase-like 2;Encodes a mitochondrial gamma carbonic anhydrase-like protein. Component of the NADH dehydrogenase complex.	mitochondrion	mitochondrion:22991283	extracellular:26572690;golgi:25900983;golgi:25900983;golgi:25900983;golgi:25900983;mitochondrion:11743114;mitochondrion:11743115;mitochondrion:12837548;mitochondrion:14671022;mitochondrion:17406791;mitochondrion:18189341;mitochondrion:20197505;mitochondrion:21841088;mitochondrion:22923678;mitochondrion:23761796;mitochondrion:27943495;mitochondrion:21896887;plasma membrane:19334764;plastid:1502820…
AT3G51830.1	SAC domain-containing protein 8;putative transmembrane protein G5p (AtG5) mRNA, complete	mitochondrion	endoplasmic reticulum:12713536	mitochondrion:27943495;mitochondrion:21896887
AT3G58840.1	Tropomyosin-related;	mitochondrion		mitochondrion:14671022;mitochondrion:21841088;mitochondrion:22923678;mitochondrion:27943495;mitochondrion:21896887;unclear:16618929
AT4G01100.1	adenine nucleotide transporter 1;	mitochondrion		golgi:25900983;golgi:25900983;golgi:25900983;golgi:25900983;mitochondrion:12586869;mitochondrion:14671022;mitochondrion:21472856;mitochondrion:21841088;mitochondrion:22923678;mitochondrion:27943495;mitochondrion:21896887;plasma membrane:19334764;unclear:16618929;vacuole:17151019
AT4G01660.1	ABC transporter 1;Encodes an ABC1-like protein, member of the ATH subfamily; putative ABC transporter; isolated by functional complementation of a yeast abc1 mutant	mitochondrion		mitochondrion:27943495;plasma membrane:21433285
AT4G05400.1	copper ion binding;	mitochondrion		mitochondrion:21841088;mitochondrion:22923678;mitochondrion:27943495
AT4G23620.1	Ribosomal protein L25/Gln-tRNA synthetase, anti-codon-binding domain;	mitochondrion		mitochondrion:21841088;mitochondrion:27943495;plastid:21531424
AT4G31460.1	Ribosomal L28 family;	mitochondrion		mitochondrion:21841088;mitochondrion:27943495;plastid:23851315
AT4G34700.1	LYR family of Fe/S cluster biogenesis protein;	mitochondrion		mitochondrion:21841088;mitochondrion:22923678;mitochondrion:23444301;mitochondrion:23761796;mitochondrion:27122571;mitochondrion:27943495;plasma membrane:19334764;vacuole:17151019
AT5G08300.1	Succinyl-CoA ligase, alpha subunit;	mitochondrion		extracellular:26572690;mitochondrion:11743114;mitochondrion:11743115;mitochondrion:12492832;mitochondrion:12606038;mitochondrion:14671022;mitochondrion:18385124;mitochondrion:21296373;mitochondrion:21472856;mitochondrion:21841088;mitochondrion:22923678;mitochondrion:27122571;mitochondrion:27943495;plasma membrane:19334764
AT5G08530.1	51 kDa subunit of complex I;	mitochondrion		golgi:25900983;mitochondrion:12837548;mitochondrion:14671022;mitochondrion:18189341;mitochondrion:20197505;mitochondrion:21296373;mitochondrion:21472856;mitochondrion:21841088;mitochondrion:22923678;mitochondrion:23761796;mitochondrion:27122571;mitochondrion:27943495;nucleus:24012629;plasma membrane:19334764;vacuole:25900983
AT5G15640.1	Mitochondrial substrate carrier family protein;	mitochondrion		mitochondrion:14671022;mitochondrion:22923678;mitochondrion:27943495;mitochondrion:21896887
AT5G27540.1	MIRO-related GTP-ase 1;Encodes a protein with similarity to GTPases that is localized to the mitochondrion. Involved in embryogenesis, pollen tube growth and required for mitochondrial development.	mitochondrion		golgi:25900983;golgi:25900983;golgi:25900983;golgi:25900983;mitochondrion:14671022;mitochondrion:15276431;mitochondrion:21472856;mitochondrion:21841088;mitochondrion:22923678;mitochondrion:27122571;mitochondrion:27943495;mitochondrion:21896887;plasma membrane:19334764;plasma membrane:21433285;plastid:24872594;unclear:16618929
AT5G39410.1	Saccharopine dehydrogenase ;	mitochondrion		golgi:25900983;golgi:25900983;golgi:25900983;golgi:25900983;mitochondrion:14671022;mitochondrion:15276431;mitochondrion:21841088;mitochondrion:27943495;mitochondrion:21896887;plasma membrane:17317660;plasma membrane:19334764;plasma membrane:21433285;plasma membrane:22215637;plasma membrane:22923678;plasma membrane:26781341;plastid:12938931;plastid:20061580;plastid:24872594;vacuole:17151019;vacuol…
AT5G39840.1	ATP-dependent RNA helicase, mitochondrial, putative;	mitochondrion		mitochondrion:27943495
AT5G46800.1	Mitochondrial substrate carrier family protein;Seedling lethal mutation; Mitochondrial Carnitine Acyl Carrier-Like Protein	mitochondrion		golgi:25900983;golgi:25900983;golgi:25900983;golgi:25900983;mitochondrion:14671022;mitochondrion:15276431;mitochondrion:21472856;mitochondrion:21841088;mitochondrion:22923678;mitochondrion:23444301;mitochondrion:24727099;mitochondrion:27943495;plasma membrane:19334764;plastid:18431481;unclear:16618929;vacuole:25900983
AT5G53070.1	Ribosomal protein L9/RNase H1;	mitochondrion		mitochondrion:21841088;mitochondrion:27943495
AT5G55140.1	ribosomal protein L30 family protein;	mitochondrion		mitochondrion:27943495
AT5G58370.1	P-loop containing nucleoside triphosphate hydrolases superfamily protein;	mitochondrion		mitochondrion:27943495
AT5G64400.1	;	mitochondrion		mitochondrion:27943495
AT5G65560.1	Pentatricopeptide repeat (PPR) superfamily protein;	mitochondrion		mitochondrion:27943495
AT1G79230.1	mercaptopyruvate sulfurtransferase 1;encodes a sulfurtransferase/rhodaneses, which belongs to a group of enzymes widely distributed in all three phyla that catalyze the transfer of sulfur from a donor to a thiophilic acceptor substrate. The protein and transcript levels are NOT affected by senescence or exogenous cyanide, suggesting that sulfurtransferases are involved in cyanide detoxification.	mitochondrion,plastid	mitochondrion:10734224;mitochondrion:10951223;mitochondrion:15181206	extracellular:26572690;golgi:25900983;mitochondrion:11743115;mitochondrion:14671022;mitochondrion:21296373;mitochondrion:21472856;mitochondrion:22923678;mitochondrion:23444301;mitochondrion:27943495;mitochondrion:23444301;plastid:21531424;plastid:20061580;plastid:24361574
AT1G59600.1	ZCW7;	nucleus		extracellular:26572690
AT2G16640.1	multimeric translocon complex in the outer envelope membrane 132;	nucleus		mitochondrion:21896887;plasma membrane:19334764;plasma membrane:21433285;plastid:22923678;plastid:20061580;unclear:16618929
AT4G03080.1	BRI1 suppressor 1 (BSU1)-like 1;	nucleus		extracellular:26572690;plasma membrane:25641898;plasma membrane:17317660;plasma membrane:21433285;plastid:20061580
AT4G21710.1	DNA-directed RNA polymerase family protein;Encodes the unique second-largest subunit of DNA-dependent RNA polymerase II; the ortholog of budding yeast RPB2 and a homolog of the E. coli RNA polymerase beta subunit.	nucleus		cytosol:21166475;golgi:25900983;golgi:25900983;golgi:25900983;golgi:25900983;golgi:25900983;nucleus:27177187;nucleus:23396599;plasma membrane:19334764
AT4G25530.1	FLOWERING WAGENINGEN;Encodes a homeodomain-containing transcription factor that controls flowering. FWA is silenced in wild type plants and reverse of the imprinted silencing causes a late flowering phenotype. FWA gene contains two tandem repeats around the transcription start site that are necessary and sufficient for silencing via DNA methylation.	nucleus
AT1G20510.1	OPC-8:0 CoA ligase1;	peroxisome	peroxisome:16963437	mitochondrion:21841088;mitochondrion:27943495;peroxisome:17951448;peroxisome:18931141;peroxisome:19329564
AT4G39850.1	peroxisomal ABC transporter 1;Encodes a peroxisomal protein of the ATP binding cassette (ABC) transporter class (PMP subfamily) with significant identity to the human X-linked adrenoleukodystrophy protein (ALDP). The gene product promotes germination and represses embryo dormancy. ABI3, ABA1, FUS3 and LEC1 are epistatic to this gene. Mutants accumulate fatty acyl CoA suggesting a defect in uptake…	peroxisome		golgi:25900983;peroxisome:18931141;peroxisome:19329564;peroxisome:24130194;plasma membrane:19334764;plasma membrane:21433285
AT5G63380.1	AMP-dependent synthetase and ligase family protein;Encodes a peroxisomal protein involved in the activation of fatty acids through esterification with CoA. At5g63380 preferentially activates fatty acids with increased chain length (C9:0 to C8:0) and thus shares characteristics with long-chain fatty acyl-CoA synthases. Also able to catalyze the conversion of OPDA to its CoA ester and is therefore …	peroxisome	peroxisome:15677481	peroxisome:19329564;plasma membrane:21433285
AT2G38940.1	phosphate transporter 1;4;Encodes Pht1;4, a member of the Pht1 family of phosphate transporters which include: Pht1;1/At5g43350, Pht1;2/At5g43370, Pht1;3/At5g43360, Pht1;4/At2g38940, Pht1;5/At2g32830, Pht1;6/At5g43340, Pht1;7/At3g54700, Pht1;8/At1g20860, Pht1;9/At1g76430 (Plant Journal 2002, 31:341).	plasma membrane	plasma membrane:24122828	golgi:22430844;plasma membrane:14506206;plasma membrane:15060130;plasma membrane:15308754;plasma membrane:17317660;plasma membrane:17644812;plasma membrane:20374526;plasma membrane:20843791;plasma membrane:21433285;plasma membrane:22318864;plasma membrane:22923678;plasma membrane:23990937;plasma membrane:24397334;plasma membrane:26781341;vacuole:14760709
AT4G12420.1	Cupredoxin superfamily protein;Encodes a protein of unknown function involved in directed root tip growth. It is a member of 19-member gene family and is distantly related structurally to the multiple-copper oxidases ascorbate oxidase and laccase, though it lacks the copper-binding domains. The protein is glycosylated and GPI-anchored. It is localized to the plasma membrane and the cell wall. The…	plasma membrane	extracellular:12119380;plasma membrane:12119380	extracellular:14595688;extracellular:16356755;extracellular:24393051;extracellular:26572690;extracellular:28155257;extracellular:28003327;golgi:25900983;golgi:25900983;golgi:25900983;golgi:25900983;golgi:25900983;plasma membrane:25641898;plasma membrane:12805588;plasma membrane:14517339;plasma membrane:15060130;plasma membrane:15308754;plasma membrane:15574830;plasma membrane:16602701;plasma memb…
AT4G30190.1	H(+)-ATPase 2;belongs to the P-type ATPase superfamily of cation-transporting ATPases, pumps protons out of the cell, generating a proton gradient that drives the active transport of nutrients by proton symport. has two autoinhibitory regions within the C-terminal dom	plasma membrane	plasma membrane:11226186;plasma membrane:15722471;plasma membrane:15923333;plasma membrane:16831869	extracellular:26572690;golgi:22430844;golgi:25900983;golgi:25900983;golgi:25900983;golgi:25900983;golgi:21826108;golgi:25900983;plasma membrane:25641898;plasma membrane:14506206;plasma membrane:15308754;plasma membrane:15574830;plasma membrane:16618929;plasma membrane:16635983;plasma membrane:17317660;plasma membrane:17644812;plasma membrane:19334764;plasma membrane:20374526;plasma membrane:20843…
AT5G16590.1	Leucine-rich repeat protein kinase family protein;	plasma membrane		extracellular:16287169;extracellular:21109274;golgi:25900983;mitochondrion:27122571;plasma membrane:25641898;plasma membrane:14506206;plasma membrane:15308754;plasma membrane:16635983;plasma membrane:17317660;plasma membrane:17644812;plasma membrane:19334764;plasma membrane:20843791;plasma membrane:21433285;plasma membrane:22215637;plasma membrane:22318864;plasma membrane:23990937;plasma membrane…
AT1G02150.1	Tetratricopeptide repeat (TPR)-like superfamily protein;	plastid		golgi:25900983;golgi:25900983;golgi:25900983;golgi:25900983;plastid:18431481;plastid:21531424;plastid:23851315;plastid:20061580;plastid:23549413;plastid:24872594;vacuole:25900983
[truncated: 20 more rows]
