# Supplementary material for: The boundary of life and death: changes in mitochondrial and cytosolic proteomes associated with programmed cell death of Arabidopsis thaliana suspension culture cells
Source: Front Plant Sci. 2023 Aug 1;14:1194866. doi: 10.3389/fpls.2023.1194866 (PMC10431908; doi:10.3389/fpls.2023.1194866)
Supplement: Supplementary file 8 [file Table_7.xlsx]

## Sheet: Sup Tab 7
Supplemental Table S7: Changes in abundance of HSPs induced by HS in cytosolic and mitochondrial fractions (log2 foldchange of FDR corrected values).
Location based on SUBA, proteins selected through search for HSP proteins.
Differences are colour-coded in red if upregulated or blue if downregulated.
Pale colours indicate that the difference in signal strength between the two groups is not significant (FDR 0.05, s0 =log2(1.5)).
	Family	Name	Location (SUBAcon)	ID	MW	Cytosol		Mitochondria
						Crt vs HS	La vs HSLa	Crt vs HS	La vs HSLa
	Chaperonin / Co-chaperones	CPN10	mitochondrion	AT1G14980	10.812	2.70605	2.15207	-2.52447	-2.83168
		CPN20 / CPN21	chloroplast	AT5G20720	26.802	1.84678	1.40753	-1.01578	-1.12948
		CPN10-2	chloroplast	AT2G44650	15.049	1.59657	1.42112	-1.13823	-1.12013
		CPN10-1 / GroES	chloroplast	AT3G60210	15.14	3.10037	3.36952	-1.15775	-0.168275
		FDH1	mitochondrion	AT5G14780	42.409	3.87225	3.00778	-2.7519	-3.0184
		TIG1	chloroplastic	AT5G55220	61.733	-0.16075	-0.73385	1.9146	2.01873
		MGE1 (mitochondrial GrpE1)	mitochondrion	AT5G55200	33.202	-0.10105	0.55625	-3.612	-3.5559
		MGE2	mitochondrion	AT4G26780	36.116	2.39653	3.09862	-2.9284	-3.23748
		HIP1 (HSP70-interacting protein 1)	cytoplasm	AT4G22670	46.621	-3.40888	-3.15782	4.3375	3.93148
		Heat shock factor binding protein (HSP)	nucleus	At4g15802	9.3472	0.27945	0.259525	2.22518	1.2348
		CGE1 (chloroplast Grpe1)	chloroplast	AT5G17710	35.493	1.40922	0.085175	1.00227	0.525625
		CCT5	cytoplasm	AT1G24510	59.384	-1.96955	-1.4092	3.5676	3.9573
		P23-1 / HSP90 co-chaperone isoform	cytosolic	AT4G02450	25.341	-0.54855	-0.8461	3.0856	2.8037
	sHSP / HSP20	BOB1	cytoplasm	AT5G53400	34.506	-3.59055	-2.69557	3.66828	3.21353
		HMP31 (Heavy metal associated protein 31)	peroxisome	AT3G56240	12.971	1.64722	0.80675	2.34032	1.97815
		Ubiquinol-cytochrome C chaperone family protein	mitochondrion	AT5G51220	32.114	-0.541575	-0.696325	-4.52525	-2.30102
	HSP40	DNAJ3	nucleus	AT3G44110	46.444	-4.65397	-2.98522	4.3411	1.85135
		GFA2	mitochondrion	AT5G48030	49.437	-0.519225	-0.8781	-3.81123	-3.6884
		ERDJ3B	ER	AT3G62600	39.199	-0.753725	-0.721225	4.91185	2.34935
		DNAJ2	nucleus	AT5G22060	46.438	-3.13242	-2.3483	3.1113	1.72915
		DnaJ domain ;Myb-like DNA-binding domain	nucelus	AT5G06110	75.632	-0.97745	-3.01803	1.51375	1.93978
		PAM18-1	mitochondrion	AT2G35795	11.997	-0.8937	-0.90035	-2.25072	-1.97055
		DJA6	chloroplast	AT2G22360	47.761	-0.658175	-0.596175	3.36852	1.2246
		DNAJ heat shock N-terminal domain-containing protein	cytosolic	AT4G39150	38.461	-4.66907	-4.99958	5.07753	4.35883
		DNAJ heat shock N-terminal domain-containing protein	golgi	At1g21080	43.923	-2.52778	-3.0621	3.73138	3.2218
		Chaperone DnaJ-domain superfamily protein	cytoplasm	AT5G22080	26.713	-2.51225	-3.04865	0.446175	0.5173
	HSP60	HSP60-3B	mitochondrial	AT3G23990	61.28	3.07968	2.43905	-2.85448	-2.96535
		HSP60-2	mitochondrial	AT2G33210	61.477	4.25205	3.96983	-2.7879	-3.41915
		HSP60-3A	mitochondrial	AT3G13860	60.466	3.98787	3.76308	-3.00427	-2.9787
		Cpn60alpha1	chloroplast	AT2G28000	62.071	0.9039	0.663225	-0.185725	-6.97327
		Cpn60beta1 / Cpn60beta4	chloroplast	AT1G55490 / AT1G26230	63.808	1.36112	0.8576	-0.4444	-0.415625
		Cpn60beta2	chloroplast	AT3G13470	63.341	1.66715	1.45723	-1.0919	-0.83885
		Cpn60beta3	chloroplast	AT5G56500	63.324	2.33608	2.0993	-1.2276	-8.92551
	HSP70	HSP70-1	cytosolic	AT5G02500	71.357	-3.0804	-2.46003	2.78658	2.60263
		HSP70-2 / HSP70-18	cytosolic	AT5G02490 / AT1G56410	71.386	-4.27983	-3.38915	5.39798	4.15915
		HSP70-3	cytosolic	AT3G09440	71.147	-3.3151	-2.68735	2.95717	2.7713
		HSP70-4	cytosolic	AT3G12580	71.101	-1.5946	-2.02177	2.58448	2.3918
		HSP70-6	chloroplast	AT4G24280	76.507	-1.70898	-2.31038	0.807225	0.922375
		HSP70-7	chloroplast	AT5G49910	76.996	-5.3026	-4.8746	0.69995	0.721325
		HSP70-9 / mtHSP70-1	mitochondrion	AT4G37910	73.074	-0.44195	-0.16325	-2.39828	-2.02343
		HSP70-10 / mtHSP70-2	mitochondrion	AT5G09590	72.99	2.74517	2.60452	-2.32815	-2.42312
		HSP70-11 / BIP1	ER	AT5G28540	73.628	-3.54648	-1.69995	2.20153	0.842475
		HSP70-12 / BIP2	ER	AT5G42020	73.56	-3.0664	-2.2038	2.1516	0.8353
		HSP70 family protein	mitochondrion	At4g32208	72.99	2.74517	2.60452	-2.32815	-2.42312
	HSP80/90	HSP90-4 / HSP81	cytosolic	AT5G56000	80.14	-3.37477	-3.52395	3.34555	3.35792
		HSP89.1	mitochondrion	AT3G07770	90.566	-1.26097	-1.23345	-2.16258	-2.0634
		HSP88-1 / 90-5 / 90C	chloroplast	AT2G04030	88.662	-3.16797	-2.76172	0.758125	0.7955
		HSP81-1 / 83 / 90-1	cytosolic	AT5G52640	81.179	0.16915	0.4681	5.5617	4.04195
		HSP81-2 /90-2	nucleus / cytosolic	AT5G56030	80.063	-2.91962	-2.51103	3.27782	3.10055
		HSP90-3 / 81-3	cytosolic	AT5G56010	80.051	-6.14453	-4.65095	4.72735	5.63847
		HSP90 / 90-7 / SHD	ER	AT4G24190	94.148	-4.11893	-2.02652	3.01965	1.15033
		HOP2	nucleus	AT1G62740	64.519	-0.86885	-0.765875	5.82222	5.14402
		HOP1	nucleus	AT1G12270	64.584	-3.70017	-4.59698	4.4678	4.2322
	HSP100 / CLP	HSP93-1 / ClpC1	chloroplast	AT5G50920	103.45	-0.62245	0.500075	1.82935	1.5687
		HSP93-III / ClpC2 / ERD1 / ClpD	chloroplast	AT3G48870 / AT5G51070	102.24	-2.85555	-3.5261	0.914275	0.75705
		ClpB3	chloroplast	AT5G15450	108.94	-1.57975	-1.93733	1.132	1.0523
		Clpt1	chloroplast	AT4G25370	26.05	2.11793	1.54137	-1.33648	-1.18562
		HSP98.7 / ClpB4	mitochondrion	AT2G25140	108.66	-0.64585	-0.74335	-2.7785	-2.71608
	HSP110	HSP70-14 / 91	cytosolic	AT1G79930	87.316	0.484325	0.395175	2.01572	1.9286
		HSP70-15	golgi	AT1G79920	91.68	0.32395	0.40635	3.40915	2.23235
		HSP70-16	cytosolic	AT1G11660	85.219	-1.44152	-1.53203	2.19425	2.09775
		HSP70-17	ER	AT4G16660	96.724	1.78142	0.85025	4.08075	1.09392
