# Supplementary material for: The boundary of life and death: changes in mitochondrial and cytosolic proteomes associated with programmed cell death of Arabidopsis thaliana suspension culture cells
Source: Front Plant Sci. 2023 Aug 1;14:1194866. doi: 10.3389/fpls.2023.1194866 (PMC10431908; doi:10.3389/fpls.2023.1194866)
Supplement: Supplementary file 9 [file DataSheet_1.xlsx]

## Sheet: SM1
Supplemental material SM1A: STRING enrichment analysis: proteins upregulated in the cytosolic fraction but not downregulated in the mitochondria
#category term ID term description observed gene count background gene count strength false discovery rate matching proteins in your network (IDs) matching proteins in your network (labels)
GO Process GO:0008152 Metabolic process 291 7962 0.35 3.25e-52 3702.AT1G01050.1	3702.AT1G02170.1	3702.AT1G02880.3	3702.AT1G03330.1	3702.AT1G04410.1	3702.AT1G05350.1	3702.AT1G05620.1	3702.AT1G06570.1	3702.AT1G08360.1	3702.AT1G09010.1	3702.AT1G11840.6	3702.AT1G11910.1	3702.AT1G12000.1	3702.AT1G12050.1	3702.AT1G12900.1	3702.AT1G13060.2	3702.AT1G13440.1	3702.AT1G14320.1	3702.AT1G15000.1	3702.AT1G15710.1	3702.AT1G15930.1	3702.AT1G17890.1	3702.AT1G18080.1	3702.AT1G18540.1	3702.AT1G19570.1	3702.AT1G20020.1	3702.AT1G21720.1	3702.AT1G23190.1	3702.AT1G23820.1	3702.AT1G26570.1	3702.AT1G28350.1	3702.AT1G29880.1	3702.AT1G30510.2	3702.AT1G31190.1	3702.AT1G31340.1	3702.AT1G32060.1	3702.AT1G32500.1	3702.AT1G33120.1	3702.AT1G35580.2	3702.AT1G35720.1	3702.AT1G36310.1	3702.AT1G42970.1	3702.AT1G43670.1	3702.AT1G44170.2	3702.AT1G50110.1	3702.AT1G50170.1	3702.AT1G50480.1	3702.AT1G52160.1	3702.AT1G52570.1	3702.AT1G53310.3
GO Process GO:0071704 Organic substance metabolic process 259 6962 0.36 1.67e-44 3702.AT1G01050.1	3702.AT1G02170.1	3702.AT1G02880.3	3702.AT1G03330.1	3702.AT1G04410.1	3702.AT1G05350.1	3702.AT1G05620.1	3702.AT1G06570.1	3702.AT1G08360.1	3702.AT1G09010.1	3702.AT1G11840.6	3702.AT1G11910.1	3702.AT1G12000.1	3702.AT1G12050.1	3702.AT1G12900.1	3702.AT1G13060.2	3702.AT1G13440.1	3702.AT1G14320.1	3702.AT1G15000.1	3702.AT1G15710.1	3702.AT1G15930.1	3702.AT1G17890.1	3702.AT1G18080.1	3702.AT1G18540.1	3702.AT1G19570.1	3702.AT1G21720.1	3702.AT1G23190.1	3702.AT1G23820.1	3702.AT1G26570.1	3702.AT1G28350.1	3702.AT1G29880.1	3702.AT1G31190.1	3702.AT1G31340.1	3702.AT1G32060.1	3702.AT1G33120.1	3702.AT1G35580.2	3702.AT1G36310.1	3702.AT1G42970.1	3702.AT1G43670.1	3702.AT1G44170.2	3702.AT1G50110.1	3702.AT1G50170.1	3702.AT1G50480.1	3702.AT1G52160.1	3702.AT1G52570.1	3702.AT1G53310.3	3702.AT1G54100.1	3702.AT1G55090.1	3702.AT1G56450.1	3702.AT1G62810.1
GO Process GO:0044237 Cellular metabolic process 254 6729 0.37 1.78e-44 3702.AT1G01050.1	3702.AT1G02880.3	3702.AT1G03330.1	3702.AT1G04410.1	3702.AT1G05350.1	3702.AT1G05620.1	3702.AT1G06570.1	3702.AT1G08360.1	3702.AT1G11840.6	3702.AT1G12000.1	3702.AT1G12050.1	3702.AT1G12900.1	3702.AT1G13060.2	3702.AT1G13440.1	3702.AT1G14320.1	3702.AT1G15000.1	3702.AT1G15710.1	3702.AT1G15930.1	3702.AT1G17890.1	3702.AT1G18080.1	3702.AT1G18540.1	3702.AT1G19570.1	3702.AT1G20020.1	3702.AT1G21720.1	3702.AT1G23820.1	3702.AT1G26570.1	3702.AT1G28350.1	3702.AT1G29880.1	3702.AT1G30510.2	3702.AT1G31190.1	3702.AT1G31340.1	3702.AT1G32060.1	3702.AT1G32500.1	3702.AT1G33120.1	3702.AT1G35580.2	3702.AT1G36310.1	3702.AT1G42970.1	3702.AT1G43670.1	3702.AT1G44170.2	3702.AT1G50110.1	3702.AT1G50170.1	3702.AT1G50480.1	3702.AT1G52160.1	3702.AT1G52570.1	3702.AT1G53310.3	3702.AT1G54100.1	3702.AT1G55090.1	3702.AT1G56450.1	3702.AT1G62810.1	3702.AT1G65960.2
GO Process GO:0044281 Small molecule metabolic process 118 1509 0.68 1.31e-42 3702.AT1G02880.3	3702.AT1G04410.1	3702.AT1G05620.1	3702.AT1G06570.1	3702.AT1G11840.6	3702.AT1G12000.1	3702.AT1G12050.1	3702.AT1G12900.1	3702.AT1G13440.1	3702.AT1G15710.1	3702.AT1G17890.1	3702.AT1G23190.1	3702.AT1G26570.1	3702.AT1G28350.1	3702.AT1G29880.1	3702.AT1G31190.1	3702.AT1G35580.2	3702.AT1G42970.1	3702.AT1G43670.1	3702.AT1G50110.1	3702.AT1G50480.1	3702.AT1G55090.1	3702.AT1G65960.2	3702.AT1G67280.1	3702.AT1G69370.1	3702.AT1G70410.2	3702.AT1G70730.3	3702.AT1G71170.1	3702.AT1G76550.1	3702.AT1G78680.1	3702.AT1G80360.1	3702.AT1G80460.1	3702.AT2G02390.3	3702.AT2G03800.1	3702.AT2G21170.1	3702.AT2G21330.1	3702.AT2G22240.1	3702.AT2G22570.1	3702.AT2G27150.2	3702.AT2G28100.1	3702.AT2G29560.1	3702.AT2G33840.1	3702.AT2G36530.1	3702.AT2G37500.1	3702.AT2G41530.1	3702.AT2G42910.1	3702.AT2G43710.1	3702.AT3G01390.2	3702.AT3G02720.1	3702.AT3G03780.1
GO Process GO:1901564 Organonitrogen compound metabolic process 184 4053 0.45 3.52e-38 3702.AT1G02170.1	3702.AT1G02880.3	3702.AT1G05350.1	3702.AT1G05620.1	3702.AT1G06570.1	3702.AT1G08360.1	3702.AT1G11910.1	3702.AT1G12000.1	3702.AT1G12050.1	3702.AT1G13060.2	3702.AT1G13440.1	3702.AT1G14320.1	3702.AT1G15000.1	3702.AT1G15710.1	3702.AT1G15930.1	3702.AT1G18080.1	3702.AT1G18540.1	3702.AT1G19570.1	3702.AT1G21720.1	3702.AT1G23820.1	3702.AT1G26570.1	3702.AT1G28350.1	3702.AT1G29880.1	3702.AT1G31340.1	3702.AT1G33120.1	3702.AT1G35580.2	3702.AT1G50110.1	3702.AT1G50170.1	3702.AT1G50480.1	3702.AT1G52570.1	3702.AT1G55090.1	3702.AT1G56450.1	3702.AT1G62810.1	3702.AT1G65960.2	3702.AT1G69370.1	3702.AT1G70310.1	3702.AT1G70410.2	3702.AT1G71170.1	3702.AT1G74050.1	3702.AT1G74920.1	3702.AT1G76550.1	3702.AT1G77440.1	3702.AT1G77710.1	3702.AT1G78380.1	3702.AT1G78680.1	3702.AT1G79210.2	3702.AT1G79690.1	3702.AT1G80360.1	3702.AT2G02390.3	3702.AT2G03800.1
GO Process GO:0044238 Primary metabolic process 227 6374 0.34 1.40e-33 3702.AT1G01050.1	3702.AT1G02170.1	3702.AT1G03330.1	3702.AT1G04410.1	3702.AT1G05350.1	3702.AT1G05620.1	3702.AT1G06570.1	3702.AT1G08360.1	3702.AT1G09010.1	3702.AT1G11910.1	3702.AT1G12000.1	3702.AT1G12050.1	3702.AT1G12900.1	3702.AT1G13060.2	3702.AT1G13440.1	3702.AT1G14320.1	3702.AT1G15000.1	3702.AT1G15710.1	3702.AT1G15930.1	3702.AT1G17890.1	3702.AT1G18080.1	3702.AT1G18540.1	3702.AT1G19570.1	3702.AT1G21720.1	3702.AT1G23190.1	3702.AT1G26570.1	3702.AT1G28350.1	3702.AT1G29880.1	3702.AT1G31190.1	3702.AT1G31340.1	3702.AT1G32060.1	3702.AT1G33120.1	3702.AT1G35580.2	3702.AT1G36310.1	3702.AT1G42970.1	3702.AT1G43670.1	3702.AT1G50110.1	3702.AT1G50480.1	3702.AT1G52160.1	3702.AT1G52570.1	3702.AT1G53310.3	3702.AT1G55090.1	3702.AT1G56450.1	3702.AT1G65960.2	3702.AT1G67090.1	3702.AT1G69370.1	3702.AT1G69800.2	3702.AT1G70730.3	3702.AT1G71170.1	3702.AT1G74050.1
GO Process GO:0006807 Nitrogen compound metabolic process 204 5335 0.37 4.98e-33 3702.AT1G02170.1	3702.AT1G02880.3	3702.AT1G03330.1	3702.AT1G05350.1	3702.AT1G05620.1	3702.AT1G06570.1	3702.AT1G08360.1	3702.AT1G11910.1	3702.AT1G12000.1	3702.AT1G12050.1	3702.AT1G13060.2	3702.AT1G13440.1	3702.AT1G14320.1	3702.AT1G15000.1	3702.AT1G15710.1	3702.AT1G15930.1	3702.AT1G17890.1	3702.AT1G18080.1	3702.AT1G18540.1	3702.AT1G19570.1	3702.AT1G21720.1	3702.AT1G23820.1	3702.AT1G26570.1	3702.AT1G28350.1	3702.AT1G29880.1	3702.AT1G31340.1	3702.AT1G33120.1	3702.AT1G35580.2	3702.AT1G36310.1	3702.AT1G50110.1	3702.AT1G50170.1	3702.AT1G50480.1	3702.AT1G52160.1	3702.AT1G52570.1	3702.AT1G55090.1	3702.AT1G56450.1	3702.AT1G62810.1	3702.AT1G65960.2	3702.AT1G69370.1	3702.AT1G70310.1	3702.AT1G70410.2	3702.AT1G71170.1	3702.AT1G74050.1	3702.AT1G74920.1	3702.AT1G76550.1	3702.AT1G76860.1	3702.AT1G77440.1	3702.AT1G77710.1	3702.AT1G78380.1	3702.AT1G78680.1
GO Process GO:1901576 Organic substance biosynthetic process 129 2363 0.53 7.42e-32 3702.AT1G02880.3	3702.AT1G08360.1	3702.AT1G12900.1	3702.AT1G13440.1	3702.AT1G14320.1	3702.AT1G15710.1	3702.AT1G15930.1	3702.AT1G17890.1	3702.AT1G18080.1	3702.AT1G18540.1	3702.AT1G23820.1	3702.AT1G26570.1	3702.AT1G28350.1	3702.AT1G29880.1	3702.AT1G31190.1	3702.AT1G31340.1	3702.AT1G32060.1	3702.AT1G33120.1	3702.AT1G42970.1	3702.AT1G43670.1	3702.AT1G50110.1	3702.AT1G50170.1	3702.AT1G50480.1	3702.AT1G55090.1	3702.AT1G67090.1	3702.AT1G69370.1	3702.AT1G70310.1	3702.AT1G72680.1	3702.AT1G74050.1	3702.AT1G74920.1	3702.AT1G80360.1	3702.AT1G80460.1	3702.AT2G02990.1	3702.AT2G09990.1	3702.AT2G19730.3	3702.AT2G21170.1	3702.AT2G21330.1	3702.AT2G22240.1	3702.AT2G22570.1	3702.AT2G27150.2	3702.AT2G27530.1	3702.AT2G27720.2	3702.AT2G33840.1	3702.AT2G34480.1	3702.AT2G35840.3	3702.AT2G37500.1	3702.AT2G39390.1	3702.AT2G40590.1	3702.AT2G42910.1	3702.AT2G43710.1
GO Process GO:0009058 Biosynthetic process 132 2480 0.52 1.01e-31 3702.AT1G02880.3	3702.AT1G08360.1	3702.AT1G12900.1	3702.AT1G13440.1	3702.AT1G14320.1	3702.AT1G15710.1	3702.AT1G15930.1	3702.AT1G17890.1	3702.AT1G18080.1	3702.AT1G18540.1	3702.AT1G23820.1	3702.AT1G26570.1	3702.AT1G28350.1	3702.AT1G29880.1	3702.AT1G31190.1	3702.AT1G31340.1	3702.AT1G32060.1	3702.AT1G33120.1	3702.AT1G42970.1	3702.AT1G43670.1	3702.AT1G50110.1	3702.AT1G50170.1	3702.AT1G50480.1	3702.AT1G55090.1	3702.AT1G62810.1	3702.AT1G67090.1	3702.AT1G69370.1	3702.AT1G70310.1	3702.AT1G72680.1	3702.AT1G74050.1	3702.AT1G74920.1	3702.AT1G80360.1	3702.AT1G80460.1	3702.AT2G02990.1	3702.AT2G09990.1	3702.AT2G19730.3	3702.AT2G21170.1	3702.AT2G21330.1	3702.AT2G22240.1	3702.AT2G22570.1	3702.AT2G27150.2	3702.AT2G27530.1	3702.AT2G27720.2	3702.AT2G33840.1	3702.AT2G34480.1	3702.AT2G35840.3	3702.AT2G37500.1	3702.AT2G39390.1	3702.AT2G40590.1	3702.AT2G42910.1
GO Process GO:1901566 Organonitrogen compound biosynthetic process 88 1168 0.67 1.03e-29 3702.AT1G02880.3	3702.AT1G08360.1	3702.AT1G14320.1	3702.AT1G15710.1	3702.AT1G15930.1	3702.AT1G18080.1	3702.AT1G18540.1	3702.AT1G23820.1	3702.AT1G26570.1	3702.AT1G28350.1	3702.AT1G29880.1	3702.AT1G33120.1	3702.AT1G50110.1	3702.AT1G50170.1	3702.AT1G50480.1	3702.AT1G55090.1	3702.AT1G69370.1	3702.AT1G70310.1	3702.AT1G74050.1	3702.AT1G74920.1	3702.AT2G09990.1	3702.AT2G19730.3	3702.AT2G22570.1	3702.AT2G27530.1	3702.AT2G27720.2	3702.AT2G33840.1	3702.AT2G34480.1	3702.AT2G37500.1	3702.AT2G39390.1	3702.AT2G40590.1	3702.AT2G42910.1	3702.AT3G01390.2	3702.AT3G02560.2	3702.AT3G03780.1	3702.AT3G04400.1	3702.AT3G04520.1	3702.AT3G06350.1	3702.AT3G07110.2	3702.AT3G09500.1	3702.AT3G09820.1	3702.AT3G10610.1	3702.AT3G16050.1	3702.AT3G16080.1	3702.AT3G16950.2	3702.AT3G16990.1	3702.AT3G18030.1	3702.AT3G27850.1	3702.AT3G29200.1	3702.AT3G29360.1	3702.AT3G49680.1
GO Process GO:0034641 Cellular nitrogen compound metabolic process 126 2435 0.5 6.14e-29 3702.AT1G02880.3	3702.AT1G03330.1	3702.AT1G05620.1	3702.AT1G08360.1	3702.AT1G12000.1	3702.AT1G13440.1	3702.AT1G14320.1	3702.AT1G15930.1	3702.AT1G17890.1	3702.AT1G18080.1	3702.AT1G18540.1	3702.AT1G23820.1	3702.AT1G26570.1	3702.AT1G28350.1	3702.AT1G29880.1	3702.AT1G33120.1	3702.AT1G36310.1	3702.AT1G50170.1	3702.AT1G50480.1	3702.AT1G52160.1	3702.AT1G55090.1	3702.AT1G62810.1	3702.AT1G69370.1	3702.AT1G70310.1	3702.AT1G70410.2	3702.AT1G74050.1	3702.AT1G74920.1	3702.AT1G76550.1	3702.AT1G76860.1	3702.AT1G78380.1	3702.AT1G78680.1	3702.AT1G80360.1	3702.AT2G01250.1	3702.AT2G02390.3	3702.AT2G02990.1	3702.AT2G03800.1	3702.AT2G09990.1	3702.AT2G19730.3	3702.AT2G21170.1	3702.AT2G21330.1	3702.AT2G22570.1	3702.AT2G27040.2	3702.AT2G27530.1	3702.AT2G27720.2	3702.AT2G29450.1	3702.AT2G29560.1	3702.AT2G30860.1	3702.AT2G30870.1	3702.AT2G33840.1	3702.AT2G34260.1
GO Process GO:0009987 Cellular process 300 11004 0.23 2.15e-28 3702.AT1G01050.1	3702.AT1G02880.3	3702.AT1G03330.1	3702.AT1G04410.1	3702.AT1G05350.1	3702.AT1G05620.1	3702.AT1G06570.1	3702.AT1G08360.1	3702.AT1G08780.1	3702.AT1G11840.6	3702.AT1G12000.1	3702.AT1G12050.1	3702.AT1G12840.1	3702.AT1G12900.1	3702.AT1G13060.2	3702.AT1G13440.1	3702.AT1G14320.1	3702.AT1G15000.1	3702.AT1G15500.1	3702.AT1G15710.1	3702.AT1G15930.1	3702.AT1G17890.1	3702.AT1G18080.1	3702.AT1G18540.1	3702.AT1G19570.1	3702.AT1G20010.1	3702.AT1G20020.1	3702.AT1G21720.1	3702.AT1G23820.1	3702.AT1G26570.1	3702.AT1G28350.1	3702.AT1G29880.1	3702.AT1G30510.2	3702.AT1G31190.1	3702.AT1G31340.1	3702.AT1G32060.1	3702.AT1G32500.1	3702.AT1G33120.1	3702.AT1G35580.2	3702.AT1G35720.1	3702.AT1G36310.1	3702.AT1G42970.1	3702.AT1G43670.1	3702.AT1G43890.1	3702.AT1G44170.2	3702.AT1G47200.1	3702.AT1G50110.1	3702.AT1G50170.1	3702.AT1G50480.1	3702.AT1G52160.1
GO Process GO:0019752 Carboxylic acid metabolic process 75 896 0.71 1.16e-27 3702.AT1G04410.1	3702.AT1G06570.1	3702.AT1G11840.6	3702.AT1G12000.1	3702.AT1G12050.1	3702.AT1G13440.1	3702.AT1G15710.1	3702.AT1G26570.1	3702.AT1G28350.1	3702.AT1G29880.1	3702.AT1G35580.2	3702.AT1G50110.1	3702.AT1G50480.1	3702.AT1G65960.2	3702.AT1G67280.1	3702.AT1G69370.1	3702.AT1G71170.1	3702.AT1G76550.1	3702.AT1G78680.1	3702.AT1G80360.1	3702.AT2G02390.3	3702.AT2G03800.1	3702.AT2G21170.1	3702.AT2G21330.1	3702.AT2G27150.2	3702.AT2G29560.1	3702.AT2G33840.1	3702.AT2G36530.1	3702.AT2G37500.1	3702.AT2G43710.1	3702.AT3G02720.1	3702.AT3G03780.1	3702.AT3G04520.1	3702.AT3G06350.1	3702.AT3G10850.1	3702.AT3G12290.1	3702.AT3G14990.1	3702.AT3G16050.1	3702.AT3G16950.2	3702.AT3G25780.1	3702.AT3G29200.1	3702.AT3G29360.1	3702.AT3G43600.1	3702.AT3G49680.1	3702.AT3G54640.1	3702.AT3G55440.1	3702.AT3G60880.2	3702.AT3G63170.1	3702.AT4G02610.1	3702.AT4G04040.1
GO Process GO:0044249 Cellular biosynthetic process 118 2275 0.51 6.09e-27 3702.AT1G02880.3	3702.AT1G08360.1	3702.AT1G14320.1	3702.AT1G15710.1	3702.AT1G15930.1	3702.AT1G17890.1	3702.AT1G18080.1	3702.AT1G18540.1	3702.AT1G23820.1	3702.AT1G26570.1	3702.AT1G28350.1	3702.AT1G29880.1	3702.AT1G31190.1	3702.AT1G31340.1	3702.AT1G33120.1	3702.AT1G43670.1	3702.AT1G50110.1	3702.AT1G50170.1	3702.AT1G50480.1	3702.AT1G55090.1	3702.AT1G62810.1	3702.AT1G69370.1	3702.AT1G70310.1	3702.AT1G72680.1	3702.AT1G74050.1	3702.AT1G74920.1	3702.AT1G80360.1	3702.AT2G09990.1	3702.AT2G19730.3	3702.AT2G21170.1	3702.AT2G22240.1	3702.AT2G22570.1	3702.AT2G27150.2	3702.AT2G27530.1	3702.AT2G27720.2	3702.AT2G33840.1	3702.AT2G34480.1	3702.AT2G35840.3	3702.AT2G37500.1	3702.AT2G39390.1	3702.AT2G40590.1	3702.AT2G42910.1	3702.AT2G43710.1	3702.AT3G01390.2	3702.AT3G02560.2	3702.AT3G02720.1	3702.AT3G03780.1	3702.AT3G04400.1	3702.AT3G04520.1	3702.AT3G06350.1
GO Process GO:0006082 Organic acid metabolic process 77 1028 0.67 1.33e-25 3702.AT1G04410.1	3702.AT1G06570.1	3702.AT1G11840.6	3702.AT1G12000.1	3702.AT1G12050.1	3702.AT1G13440.1	3702.AT1G15710.1	3702.AT1G26570.1	3702.AT1G28350.1	3702.AT1G29880.1	3702.AT1G35580.2	3702.AT1G50110.1	3702.AT1G50480.1	3702.AT1G65960.2	3702.AT1G67280.1	3702.AT1G69370.1	3702.AT1G70410.2	3702.AT1G71170.1	3702.AT1G76550.1	3702.AT1G78680.1	3702.AT1G80360.1	3702.AT2G02390.3	3702.AT2G03800.1	3702.AT2G21170.1	3702.AT2G21330.1	3702.AT2G27150.2	3702.AT2G29560.1	3702.AT2G33840.1	3702.AT2G36530.1	3702.AT2G37500.1	3702.AT2G43710.1	3702.AT3G02720.1	3702.AT3G03780.1	3702.AT3G04520.1	3702.AT3G06350.1	3702.AT3G10850.1	3702.AT3G12290.1	3702.AT3G14990.1	3702.AT3G16050.1	3702.AT3G16950.2	3702.AT3G23490.1	3702.AT3G25780.1	3702.AT3G29200.1	3702.AT3G29360.1	3702.AT3G43600.1	3702.AT3G49680.1	3702.AT3G54640.1	3702.AT3G55440.1	3702.AT3G60880.2	3702.AT3G63170.1
GO Process GO:0044271 Cellular nitrogen compound biosynthetic process 74 1068 0.63 1.31e-22 3702.AT1G02880.3	3702.AT1G08360.1	3702.AT1G14320.1	3702.AT1G15930.1	3702.AT1G17890.1	3702.AT1G18080.1	3702.AT1G18540.1	3702.AT1G23820.1	3702.AT1G26570.1	3702.AT1G28350.1	3702.AT1G29880.1	3702.AT1G33120.1	3702.AT1G50170.1	3702.AT1G50480.1	3702.AT1G55090.1	3702.AT1G62810.1	3702.AT1G69370.1	3702.AT1G70310.1	3702.AT1G74050.1	3702.AT1G74920.1	3702.AT2G09990.1	3702.AT2G19730.3	3702.AT2G22570.1	3702.AT2G27530.1	3702.AT2G27720.2	3702.AT2G33840.1	3702.AT2G34480.1	3702.AT2G39390.1	3702.AT2G40590.1	3702.AT2G42910.1	3702.AT3G01390.2	3702.AT3G02560.2	3702.AT3G04400.1	3702.AT3G07110.2	3702.AT3G09500.1	3702.AT3G09820.1	3702.AT3G10610.1	3702.AT3G16050.1	3702.AT3G16080.1	3702.AT3G16950.2	3702.AT3G16990.1	3702.AT3G18030.1	3702.AT3G27850.1	3702.AT3G29360.1	3702.AT3G46440.2	3702.AT3G51160.1	3702.AT3G52580.1	3702.AT3G53430.1	3702.AT3G53870.1	3702.AT3G54640.1
GO Process GO:0046686 Response to cadmium ion 40 269 0.96 4.05e-22 3702.AT1G04410.1	3702.AT1G11840.6	3702.AT1G12000.1	3702.AT1G13440.1	3702.AT1G15930.1	3702.AT1G18080.1	3702.AT1G23190.1	3702.AT1G29880.1	3702.AT1G35720.1	3702.AT1G42970.1	3702.AT1G50480.1	3702.AT1G56450.1	3702.AT1G60710.1	3702.AT1G78380.1	3702.AT2G21330.1	3702.AT2G27020.1	3702.AT2G30860.1	3702.AT2G30870.1	3702.AT2G35840.3	3702.AT2G36530.1	3702.AT2G41530.1	3702.AT3G03780.1	3702.AT3G09820.1	3702.AT3G12500.1	3702.AT3G13235.1	3702.AT3G14990.1	3702.AT3G22110.1	3702.AT3G46970.1	3702.AT3G53620.1	3702.AT3G55440.1	3702.AT3G56240.1	3702.AT3G60750.1	3702.AT4G08790.1	3702.AT4G13430.1	3702.AT4G25100.1	3702.AT5G16050.1	3702.AT5G16970.1	3702.AT5G20830.1	3702.AT5G27470.1	3702.AT5G42740.1 c-NAD-MDH1	GLX1	AT1G12000	GAPC2	AT1G15930	ATARCA	PGM3	AT1G29880	ANNAT1	GAPB	THFS
GO Process GO:0009056 Catabolic process 88 1576 0.54 2.85e-21 3702.AT1G05620.1	3702.AT1G06570.1	3702.AT1G11840.6	3702.AT1G11910.1	3702.AT1G12000.1	3702.AT1G12050.1	3702.AT1G13060.2	3702.AT1G13440.1	3702.AT1G15000.1	3702.AT1G21720.1	3702.AT1G31190.1	3702.AT1G31340.1	3702.AT1G35580.2	3702.AT1G43670.1	3702.AT1G52570.1	3702.AT1G56450.1	3702.AT1G65960.2	3702.AT1G67280.1	3702.AT1G70410.2	3702.AT1G71170.1	3702.AT1G76550.1	3702.AT1G76860.1	3702.AT1G77440.1	3702.AT1G78380.1	3702.AT1G79210.2	3702.AT1G80360.1	3702.AT1G80460.1	3702.AT2G02390.3	3702.AT2G02990.1	3702.AT2G03800.1	3702.AT2G05840.1	3702.AT2G21170.1	3702.AT2G21330.1	3702.AT2G27020.1	3702.AT2G28100.1	3702.AT2G29450.1	3702.AT2G29560.1	3702.AT2G30860.1	3702.AT2G30870.1	3702.AT2G36530.1	3702.AT2G41530.1	3702.AT2G42690.1	3702.AT3G02540.1	3702.AT3G02720.1	3702.AT3G03520.1	3702.AT3G04520.1	3702.AT3G10850.1	3702.AT3G12500.1	3702.AT3G14990.1	3702.AT3G22110.1
GO Process GO:1901575 Organic substance catabolic process 81 1353 0.57 3.50e-21 3702.AT1G05620.1	3702.AT1G06570.1	3702.AT1G11840.6	3702.AT1G11910.1	3702.AT1G12000.1	3702.AT1G12050.1	3702.AT1G13060.2	3702.AT1G13440.1	3702.AT1G15000.1	3702.AT1G21720.1	3702.AT1G31190.1	3702.AT1G31340.1	3702.AT1G35580.2	3702.AT1G43670.1	3702.AT1G52570.1	3702.AT1G56450.1	3702.AT1G65960.2	3702.AT1G67280.1	3702.AT1G70410.2	3702.AT1G71170.1	3702.AT1G76550.1	3702.AT1G76860.1	3702.AT1G77440.1	3702.AT1G79210.2	3702.AT1G80360.1	3702.AT1G80460.1	3702.AT2G02390.3	3702.AT2G02990.1	3702.AT2G03800.1	3702.AT2G05840.1	3702.AT2G21170.1	3702.AT2G21330.1	3702.AT2G27020.1	3702.AT2G28100.1	3702.AT2G29560.1	3702.AT2G36530.1	3702.AT2G41530.1	3702.AT2G42690.1	3702.AT3G02540.1	3702.AT3G02720.1	3702.AT3G03520.1	3702.AT3G04520.1	3702.AT3G10850.1	3702.AT3G12500.1	3702.AT3G14990.1	3702.AT3G22110.1	3702.AT3G23490.1	3702.AT3G26340.1	3702.AT3G27430.2	3702.AT3G46970.1
GO Process GO:0010038 Response to metal ion 43 374 0.85 5.63e-20 3702.AT1G04410.1	3702.AT1G11840.6	3702.AT1G12000.1	3702.AT1G13440.1	3702.AT1G15930.1	3702.AT1G18080.1	3702.AT1G19570.1	3702.AT1G23190.1	3702.AT1G29880.1	3702.AT1G35720.1	3702.AT1G42970.1	3702.AT1G50480.1	3702.AT1G56450.1	3702.AT1G60710.1	3702.AT1G78380.1	3702.AT2G21330.1	3702.AT2G27020.1	3702.AT2G30860.1	3702.AT2G30870.1	3702.AT2G35840.3	3702.AT2G36530.1	3702.AT2G40300.1	3702.AT2G41530.1	3702.AT3G03780.1	3702.AT3G09820.1	3702.AT3G12500.1	3702.AT3G13235.1	3702.AT3G14990.1	3702.AT3G22110.1	3702.AT3G46970.1	3702.AT3G53620.1	3702.AT3G55440.1	3702.AT3G56240.1	3702.AT3G60750.1	3702.AT4G08790.1	3702.AT4G13430.1	3702.AT4G25100.1	3702.AT5G16050.1	3702.AT5G16970.1	3702.AT5G20830.1	3702.AT5G27470.1	3702.AT5G35590.1	3702.AT5G42740.1 c-NAD-MDH1	GLX1	AT1G12000	GAPC2	AT1G15930	ATARCA	DHAR1	PGM3
GO Process GO:0044283 Small molecule biosynthetic process 53 619 0.72 1.62e-19 3702.AT1G13440.1	3702.AT1G15710.1	3702.AT1G26570.1	3702.AT1G31190.1	3702.AT1G43670.1	3702.AT1G50110.1	3702.AT1G50480.1	3702.AT1G69370.1	3702.AT2G21170.1	3702.AT2G21330.1	3702.AT2G22240.1	3702.AT2G27150.2	3702.AT2G37500.1	3702.AT2G43710.1	3702.AT3G02720.1	3702.AT3G03780.1	3702.AT3G04520.1	3702.AT3G06350.1	3702.AT3G09820.1	3702.AT3G14990.1	3702.AT3G16050.1	3702.AT3G16990.1	3702.AT3G25780.1	3702.AT3G29200.1	3702.AT3G29360.1	3702.AT3G43600.1	3702.AT3G49680.1	3702.AT3G54640.1	3702.AT3G55440.1	3702.AT3G55800.1	3702.AT3G60880.2	3702.AT4G02610.1	3702.AT4G13430.1	3702.AT4G13720.1	3702.AT4G17830.2	3702.AT4G19710.2	3702.AT4G27070.1	3702.AT4G34200.1	3702.AT4G39800.1	3702.AT5G01410.1	3702.AT5G04590.1	3702.AT5G10330.1	3702.AT5G10870.1	3702.AT5G13520.1	3702.AT5G14800.1	3702.AT5G15490.1	3702.AT5G16760.1	3702.AT5G20070.1	3702.AT5G42740.1	3702.AT5G56760.1
GO Process GO:0044248 Cellular catabolic process 72 1167 0.58 2.58e-19 3702.AT1G05620.1	3702.AT1G06570.1	3702.AT1G11840.6	3702.AT1G12050.1	3702.AT1G13060.2	3702.AT1G15000.1	3702.AT1G21720.1	3702.AT1G31340.1	3702.AT1G35580.2	3702.AT1G43670.1	3702.AT1G52570.1	3702.AT1G56450.1	3702.AT1G65960.2	3702.AT1G67280.1	3702.AT1G70410.2	3702.AT1G71170.1	3702.AT1G76860.1	3702.AT1G77440.1	3702.AT1G78380.1	3702.AT1G79210.2	3702.AT1G80360.1	3702.AT1G80460.1	3702.AT2G02390.3	3702.AT2G02990.1	3702.AT2G03800.1	3702.AT2G05840.1	3702.AT2G21170.1	3702.AT2G27020.1	3702.AT2G28100.1	3702.AT2G29450.1	3702.AT2G30860.1	3702.AT2G30870.1	3702.AT2G41530.1	3702.AT3G02540.1	3702.AT3G02720.1	3702.AT3G03520.1	3702.AT3G04520.1	3702.AT3G10850.1	3702.AT3G12500.1	3702.AT3G14990.1	3702.AT3G22110.1	3702.AT3G23490.1	3702.AT3G26340.1	3702.AT3G27430.2	3702.AT3G46970.1	3702.AT3G51260.1	3702.AT3G53970.1	3702.AT3G55440.1	3702.AT3G60820.1	3702.AT3G62250.1
GO Process GO:0043603 Cellular amide metabolic process 52 632 0.71 1.92e-18 3702.AT1G08360.1	3702.AT1G14320.1	3702.AT1G15930.1	3702.AT1G18080.1	3702.AT1G18540.1	3702.AT1G28350.1	3702.AT1G29880.1	3702.AT1G33120.1	3702.AT1G50480.1	3702.AT1G74050.1	3702.AT1G78380.1	3702.AT1G78680.1	3702.AT2G02390.3	3702.AT2G09990.1	3702.AT2G19730.3	3702.AT2G27530.1	3702.AT2G27720.2	3702.AT2G29450.1	3702.AT2G30860.1	3702.AT2G30870.1	3702.AT2G33840.1	3702.AT2G34480.1	3702.AT2G39390.1	3702.AT2G40590.1	3702.AT3G02560.2	3702.AT3G04400.1	3702.AT3G07110.2	3702.AT3G09500.1	3702.AT3G10610.1	3702.AT3G12290.1	3702.AT3G16080.1	3702.AT3G16950.2	3702.AT3G27850.1	3702.AT3G52580.1	3702.AT3G53430.1	3702.AT3G53870.1	3702.AT3G55620.1	3702.AT3G60245.1	3702.AT3G61110.1	3702.AT3G62250.1	3702.AT4G00810.1	3702.AT4G15000.1	3702.AT4G18100.1	3702.AT4G29410.1	3702.AT4G33090.1	3702.AT4G36130.1	3702.AT5G03850.1	3702.AT5G27450.2	3702.AT5G27470.1	3702.AT5G27850.1
GO Process GO:0006518 Peptide metabolic process 47 510 0.76 2.21e-18 3702.AT1G08360.1	3702.AT1G14320.1	3702.AT1G15930.1	3702.AT1G18080.1	3702.AT1G18540.1	3702.AT1G28350.1	3702.AT1G29880.1	3702.AT1G33120.1	3702.AT1G74050.1	3702.AT1G78380.1	3702.AT2G02390.3	3702.AT2G09990.1	3702.AT2G19730.3	3702.AT2G27530.1	3702.AT2G27720.2	3702.AT2G29450.1	3702.AT2G30860.1	3702.AT2G30870.1	3702.AT2G33840.1	3702.AT2G34480.1	3702.AT2G39390.1	3702.AT2G40590.1	3702.AT3G02560.2	3702.AT3G04400.1	3702.AT3G07110.2	3702.AT3G09500.1	3702.AT3G10610.1	3702.AT3G16080.1	3702.AT3G27850.1	3702.AT3G52580.1	3702.AT3G53430.1	3702.AT3G53870.1	3702.AT3G55620.1	3702.AT3G60245.1	3702.AT3G61110.1	3702.AT3G62250.1	3702.AT4G00810.1	3702.AT4G15000.1	3702.AT4G18100.1	3702.AT4G29410.1	3702.AT4G33090.1	3702.AT4G36130.1	3702.AT5G03850.1	3702.AT5G27470.1	3702.AT5G27850.1	3702.AT5G37830.1	3702.AT5G67510.1 AT1G08360	SAC52	AT1G15930	ATARCA
GO Process GO:0006520 Cellular amino acid metabolic process 41 374 0.83 2.22e-18 3702.AT1G06570.1	3702.AT1G12050.1	3702.AT1G15710.1	3702.AT1G28350.1	3702.AT1G29880.1	3702.AT1G35580.2	3702.AT1G50110.1	3702.AT1G65960.2	3702.AT1G69370.1	3702.AT1G71170.1	3702.AT1G80360.1	3702.AT2G02390.3	3702.AT2G03800.1	3702.AT2G33840.1	3702.AT2G37500.1	3702.AT3G03780.1	3702.AT3G04520.1	3702.AT3G06350.1	3702.AT3G16050.1	3702.AT3G29200.1	3702.AT3G49680.1	3702.AT3G54640.1	3702.AT3G60880.2	3702.AT4G02610.1	3702.AT4G13430.1	3702.AT4G17830.2	3702.AT4G19710.2	3702.AT4G27070.1	3702.AT4G29120.1	3702.AT4G34180.1	3702.AT4G34200.1	3702.AT5G01410.1	3702.AT5G04590.1	3702.AT5G10330.1	3702.AT5G10870.1	3702.AT5G14800.1	3702.AT5G19550.1	3702.AT5G27470.1	3702.AT5G56760.1	3702.AT5G64370.1	3702.AT5G66120.2 PDS1	AT1G12050	AT1G15710	AT1G28350	AT1G29880	CINV1	AT1G50110	GAD2	CM3	AT1G71170
GO Process GO:0055086 Nucleobase-containing small molecule metabolic process 39 337 0.85 3.43e-18 3702.AT1G05620.1	3702.AT1G12000.1	3702.AT1G13440.1	3702.AT1G17890.1	3702.AT1G26570.1	3702.AT1G29880.1	3702.AT1G50480.1	3702.AT1G55090.1	3702.AT1G76550.1	3702.AT2G21170.1	3702.AT2G21330.1	3702.AT2G22570.1	3702.AT2G29560.1	3702.AT2G36530.1	3702.AT2G42910.1	3702.AT3G01390.2	3702.AT3G09820.1	3702.AT3G14990.1	3702.AT3G16950.2	3702.AT3G18030.1	3702.AT3G29360.1	3702.AT3G46440.2	3702.AT3G51160.1	3702.AT3G55440.1	3702.AT4G04040.1	3702.AT4G13720.1	3702.AT4G32840.1	3702.AT4G34890.1	3702.AT4G36940.1	3702.AT5G15490.1	3702.AT5G16510.2	3702.AT5G19150.1	3702.AT5G20070.1	3702.AT5G27450.2	3702.AT5G42740.1	3702.AT5G56630.1	3702.AT5G59290.2	3702.AT5G63310.1	3702.AT5G64370.1 URH2	AT1G12000	GAPC2	At1g17890	UGD1	AT1G29880	THFS	AT1G55090	AT1G76550	TIM	FBA1	NIC1
GO Process GO:0055114 Oxidation-reduction process 76 1369 0.53 4.91e-18 3702.AT1G04410.1	3702.AT1G06570.1	3702.AT1G11840.6	3702.AT1G12900.1	3702.AT1G13440.1	3702.AT1G15710.1	3702.AT1G17890.1	3702.AT1G19570.1	3702.AT1G20020.1	3702.AT1G26570.1	3702.AT1G30510.2	3702.AT1G35720.1	3702.AT1G42970.1	3702.AT1G44170.2	3702.AT1G50480.1	3702.AT1G53310.3	3702.AT1G54100.1	3702.AT1G60690.1	3702.AT1G60710.1	3702.AT1G60730.3	3702.AT1G62810.1	3702.AT1G67090.1	3702.AT1G71170.1	3702.AT1G72680.1	3702.AT1G74920.1	3702.AT1G78380.1	3702.AT2G02390.3	3702.AT2G04700.1	3702.AT2G15570.2	3702.AT2G17420.1	3702.AT2G25060.1	3702.AT2G27150.2	3702.AT2G30860.1	3702.AT2G40300.1	3702.AT2G42600.1	3702.AT2G43710.1	3702.AT3G04790.1	3702.AT3G06350.1	3702.AT3G12290.1	3702.AT3G14940.1	3702.AT3G15360.1	3702.AT3G16950.2	3702.AT3G25530.1	3702.AT3G29200.1	3702.AT3G29360.1	3702.AT3G43600.1	3702.AT3G46970.1	3702.AT3G52880.2	3702.AT3G60750.1	3702.AT4G05390.1
GO Process GO:0006725 Cellular aromatic compound metabolic process 97 2137 0.45 9.05e-18 3702.AT1G02880.3	3702.AT1G03330.1	3702.AT1G05620.1	3702.AT1G06570.1	3702.AT1G08360.1	3702.AT1G12000.1	3702.AT1G12050.1	3702.AT1G13440.1	3702.AT1G15710.1	3702.AT1G17890.1	3702.AT1G26570.1	3702.AT1G28350.1	3702.AT1G29880.1	3702.AT1G36310.1	3702.AT1G50170.1	3702.AT1G50480.1	3702.AT1G52160.1	3702.AT1G55090.1	3702.AT1G69370.1	3702.AT1G72680.1	3702.AT1G76550.1	3702.AT1G76860.1	3702.AT1G78680.1	3702.AT1G80360.1	3702.AT2G01250.1	3702.AT2G02390.3	3702.AT2G02990.1	3702.AT2G03800.1	3702.AT2G09990.1	3702.AT2G21170.1	3702.AT2G21330.1	3702.AT2G22570.1	3702.AT2G27040.2	3702.AT2G27530.1	3702.AT2G29560.1	3702.AT2G33840.1	3702.AT2G34260.1	3702.AT2G36530.1	3702.AT2G39390.1	3702.AT2G42910.1	3702.AT2G43810.1	3702.AT2G44120.2	3702.AT3G01390.2	3702.AT3G02540.1	3702.AT3G02560.2	3702.AT3G06350.1	3702.AT3G09500.1	3702.AT3G09820.1	3702.AT3G12290.1	3702.AT3G13580.3
GO Process GO:0019637 Organophosphate metabolic process 46 522 0.74 2.51e-17 3702.AT1G02880.3	3702.AT1G12000.1	3702.AT1G13440.1	3702.AT1G29880.1	3702.AT1G31190.1	3702.AT1G43670.1	3702.AT1G52570.1	3702.AT1G55090.1	3702.AT1G76550.1	3702.AT1G80460.1	3702.AT2G21170.1	3702.AT2G21330.1	3702.AT2G22240.1	3702.AT2G22570.1	3702.AT2G29560.1	3702.AT2G36530.1	3702.AT2G42910.1	3702.AT3G01390.2	3702.AT3G03520.1	3702.AT3G04790.1	3702.AT3G09820.1	3702.AT3G14990.1	3702.AT3G16050.1	3702.AT3G16950.2	3702.AT3G16990.1	3702.AT3G18030.1	3702.AT3G55440.1	3702.AT3G55800.1	3702.AT3G60750.1	3702.AT4G04040.1	3702.AT4G13720.1	3702.AT4G32840.1	3702.AT4G36940.1	3702.AT4G39800.1	3702.AT5G01410.1	3702.AT5G16760.1	3702.AT5G19150.1	3702.AT5G20070.1	3702.AT5G27450.2	3702.AT5G42740.1	3702.AT5G56630.1	3702.AT5G60600.1	3702.AT5G61410.1	3702.AT5G63310.1	3702.AT5G63980.1	3702.AT5G63990.1 TPK1	AT1G12000	GAPC2	AT1G29880	IMPL1
GO Process GO:1901360 Organic cyclic compound metabolic process 98 2229 0.43 4.30e-17 3702.AT1G02880.3	3702.AT1G03330.1	3702.AT1G05620.1	3702.AT1G06570.1	3702.AT1G08360.1	3702.AT1G12000.1	3702.AT1G12050.1	3702.AT1G13440.1	3702.AT1G15710.1	3702.AT1G17890.1	3702.AT1G26570.1	3702.AT1G28350.1	3702.AT1G29880.1	3702.AT1G36310.1	3702.AT1G50170.1	3702.AT1G50480.1	3702.AT1G52160.1	3702.AT1G55090.1	3702.AT1G69370.1	3702.AT1G72680.1	3702.AT1G76550.1	3702.AT1G76860.1	3702.AT1G78680.1	3702.AT1G80360.1	3702.AT2G01250.1	3702.AT2G02390.3	3702.AT2G02990.1	3702.AT2G03800.1	3702.AT2G09990.1	3702.AT2G21170.1	3702.AT2G21330.1	3702.AT2G22570.1	3702.AT2G27040.2	3702.AT2G27530.1	3702.AT2G29560.1	3702.AT2G33840.1	3702.AT2G34260.1	3702.AT2G36530.1	3702.AT2G39390.1	3702.AT2G42910.1	3702.AT2G43810.1	3702.AT2G44120.2	3702.AT3G01390.2	3702.AT3G02540.1	3702.AT3G02560.2	3702.AT3G06350.1	3702.AT3G09500.1	3702.AT3G09820.1	3702.AT3G12290.1	3702.AT3G13580.3
GO Process GO:0010035 Response to inorganic substance 56 801 0.64 4.89e-17 3702.AT1G04410.1	3702.AT1G11840.6	3702.AT1G12000.1	3702.AT1G13440.1	3702.AT1G15930.1	3702.AT1G18080.1	3702.AT1G19570.1	3702.AT1G20450.1	3702.AT1G23190.1	3702.AT1G29880.1	3702.AT1G35580.2	3702.AT1G35720.1	3702.AT1G42970.1	3702.AT1G44170.2	3702.AT1G50480.1	3702.AT1G54100.1	3702.AT1G56450.1	3702.AT1G60710.1	3702.AT1G74920.1	3702.AT1G78380.1	3702.AT2G17420.1	3702.AT2G21330.1	3702.AT2G27020.1	3702.AT2G30860.1	3702.AT2G30870.1	3702.AT2G35840.3	3702.AT2G36530.1	3702.AT2G40300.1	3702.AT2G41530.1	3702.AT3G03780.1	3702.AT3G09820.1	3702.AT3G12490.2	3702.AT3G12500.1	3702.AT3G13235.1	3702.AT3G14990.1	3702.AT3G22110.1	3702.AT3G23400.1	3702.AT3G46970.1	3702.AT3G52880.2	3702.AT3G53620.1	3702.AT3G55440.1	3702.AT3G56240.1	3702.AT3G59380.1	3702.AT3G60750.1	3702.AT4G08790.1	3702.AT4G13430.1	3702.AT4G25100.1	3702.AT4G34890.1	3702.AT5G16050.1	3702.AT5G16970.1
GO Process GO:0010499 Proteasomal ubiquitin-independent protein catabolic process 16 25 1.6 1.35e-16 3702.AT1G13060.2	3702.AT1G21720.1	3702.AT1G56450.1	3702.AT1G77440.1	3702.AT1G79210.2	3702.AT2G05840.1	3702.AT2G27020.1	3702.AT3G22110.1	3702.AT3G26340.1	3702.AT3G27430.2	3702.AT3G51260.1	3702.AT3G60820.1	3702.AT4G14800.2	3702.AT4G31300.2	3702.AT5G35590.1	3702.AT5G42790.1 PBE1	PBC1	PBG1	PBC2	AT1G79210	At2g05840	PAG1	PAC1	AT3G26340	PBB1	PAD1	PBF1	PBD2	PBA1	At5g35590	PAF1
GO Process GO:0006412 Translation 40 437 0.75 1.73e-15 3702.AT1G08360.1	3702.AT1G14320.1	3702.AT1G15930.1	3702.AT1G18080.1	3702.AT1G18540.1	3702.AT1G28350.1	3702.AT1G29880.1	3702.AT1G33120.1	3702.AT1G74050.1	3702.AT2G09990.1	3702.AT2G19730.3	3702.AT2G27530.1	3702.AT2G27720.2	3702.AT2G33840.1	3702.AT2G34480.1	3702.AT2G39390.1	3702.AT2G40590.1	3702.AT3G02560.2	3702.AT3G04400.1	3702.AT3G07110.2	3702.AT3G09500.1	3702.AT3G10610.1	3702.AT3G16080.1	3702.AT3G27850.1	3702.AT3G52580.1	3702.AT3G53430.1	3702.AT3G53870.1	3702.AT3G55620.1	3702.AT3G60245.1	3702.AT3G61110.1	3702.AT3G62250.1	3702.AT4G00810.1	3702.AT4G15000.1	3702.AT4G18100.1	3702.AT4G29410.1	3702.AT4G36130.1	3702.AT5G03850.1	3702.AT5G27470.1	3702.AT5G27850.1	3702.AT5G67510.1 AT1G08360	SAC52	AT1G15930	ATARCA	AT1G18540	AT1G28350	AT1G29880	RPL9B	AT1G74050	AT2G09990	AT2G19730
GO Process GO:0043604 Amide biosynthetic process 42 511 0.71 8.69e-15 3702.AT1G08360.1	3702.AT1G14320.1	3702.AT1G15930.1	3702.AT1G18080.1	3702.AT1G18540.1	3702.AT1G28350.1	3702.AT1G29880.1	3702.AT1G33120.1	3702.AT1G50480.1	3702.AT1G74050.1	3702.AT2G09990.1	3702.AT2G19730.3	3702.AT2G27530.1	3702.AT2G27720.2	3702.AT2G33840.1	3702.AT2G34480.1	3702.AT2G39390.1	3702.AT2G40590.1	3702.AT3G02560.2	3702.AT3G04400.1	3702.AT3G07110.2	3702.AT3G09500.1	3702.AT3G10610.1	3702.AT3G16080.1	3702.AT3G16950.2	3702.AT3G27850.1	3702.AT3G52580.1	3702.AT3G53430.1	3702.AT3G53870.1	3702.AT3G55620.1	3702.AT3G60245.1	3702.AT3G61110.1	3702.AT3G62250.1	3702.AT4G00810.1	3702.AT4G15000.1	3702.AT4G18100.1	3702.AT4G29410.1	3702.AT4G36130.1	3702.AT5G03850.1	3702.AT5G27470.1	3702.AT5G27850.1	3702.AT5G67510.1 AT1G08360	SAC52	AT1G15930	ATARCA	AT1G18540	AT1G28350	AT1G29880	RPL9B	THFS
GO Process GO:0046483 Heterocycle metabolic process 87 2022 0.42 2.04e-14 3702.AT1G02880.3	3702.AT1G03330.1	3702.AT1G05620.1	3702.AT1G08360.1	3702.AT1G12000.1	3702.AT1G13440.1	3702.AT1G17890.1	3702.AT1G26570.1	3702.AT1G28350.1	3702.AT1G29880.1	3702.AT1G36310.1	3702.AT1G50170.1	3702.AT1G50480.1	3702.AT1G52160.1	3702.AT1G55090.1	3702.AT1G69370.1	3702.AT1G76550.1	3702.AT1G76860.1	3702.AT1G78680.1	3702.AT1G80360.1	3702.AT2G01250.1	3702.AT2G02990.1	3702.AT2G03800.1	3702.AT2G09990.1	3702.AT2G21170.1	3702.AT2G21330.1	3702.AT2G22570.1	3702.AT2G27040.2	3702.AT2G27530.1	3702.AT2G29560.1	3702.AT2G33840.1	3702.AT2G34260.1	3702.AT2G36530.1	3702.AT2G39390.1	3702.AT2G42910.1	3702.AT2G43810.1	3702.AT2G44120.2	3702.AT3G01390.2	3702.AT3G02540.1	3702.AT3G02560.2	3702.AT3G09500.1	3702.AT3G09820.1	3702.AT3G12290.1	3702.AT3G13580.3	3702.AT3G14990.1	3702.AT3G16050.1	3702.AT3G16950.2	3702.AT3G16990.1	3702.AT3G18030.1	3702.AT3G29360.1
GO Process GO:1901565 Organonitrogen compound catabolic process 45 699 0.6 2.73e-12 3702.AT1G05620.1	3702.AT1G06570.1	3702.AT1G11910.1	3702.AT1G12050.1	3702.AT1G13060.2	3702.AT1G15000.1	3702.AT1G21720.1	3702.AT1G31340.1	3702.AT1G56450.1	3702.AT1G65960.2	3702.AT1G70410.2	3702.AT1G71170.1	3702.AT1G77440.1	3702.AT1G79210.2	3702.AT1G80360.1	3702.AT2G02390.3	3702.AT2G03800.1	3702.AT2G05840.1	3702.AT2G27020.1	3702.AT2G28100.1	3702.AT3G02540.1	3702.AT3G04520.1	3702.AT3G12500.1	3702.AT3G22110.1	3702.AT3G23490.1	3702.AT3G26340.1	3702.AT3G27430.2	3702.AT3G51260.1	3702.AT3G53970.1	3702.AT3G60820.1	3702.AT3G62250.1	3702.AT4G05420.1	3702.AT4G14800.2	3702.AT4G29120.1	3702.AT4G31300.2	3702.AT4G33090.1	3702.AT4G34180.1	3702.AT4G34890.1	3702.AT4G37000.1	3702.AT5G20070.1	3702.AT5G35590.1	3702.AT5G37830.1	3702.AT5G38470.1	3702.AT5G42790.1	3702.AT5G64370.1 URH2	PDS1	APA1	AT1G12050	PBE1	scpl50
GO Process GO:0005975 Carbohydrate metabolic process 51 887 0.55 2.96e-12 3702.AT1G01050.1	3702.AT1G04410.1	3702.AT1G09010.1	3702.AT1G12000.1	3702.AT1G12900.1	3702.AT1G13440.1	3702.AT1G23190.1	3702.AT1G31190.1	3702.AT1G32060.1	3702.AT1G35580.2	3702.AT1G42970.1	3702.AT1G43670.1	3702.AT1G67090.1	3702.AT1G69800.2	3702.AT1G70730.3	3702.AT1G76550.1	3702.AT1G80460.1	3702.AT2G18230.1	3702.AT2G21170.1	3702.AT2G21330.1	3702.AT2G22240.1	3702.AT2G28100.1	3702.AT2G29560.1	3702.AT2G35840.3	3702.AT2G36530.1	3702.AT3G04790.1	3702.AT3G12500.1	3702.AT3G26720.1	3702.AT3G29360.1	3702.AT3G43190.1	3702.AT3G46440.2	3702.AT3G46970.1	3702.AT3G55260.1	3702.AT3G55440.1	3702.AT3G55800.1	3702.AT3G56310.1	3702.AT3G60750.1	3702.AT4G04040.1	3702.AT4G32840.1	3702.AT4G39800.1	3702.AT5G10560.1	3702.AT5G15490.1	3702.AT5G16760.1	3702.AT5G20830.1	3702.AT5G42740.1	3702.AT5G49650.1	3702.AT5G56630.1	3702.AT5G59290.2	3702.AT5G61410.1	3702.AT5G63980.1
GO Process GO:0044282 Small molecule catabolic process 26 225 0.85 6.20e-12 3702.AT1G05620.1	3702.AT1G06570.1	3702.AT1G11840.6	3702.AT1G12050.1	3702.AT1G31190.1	3702.AT1G65960.2	3702.AT1G67280.1	3702.AT1G71170.1	3702.AT1G80360.1	3702.AT1G80460.1	3702.AT2G02390.3	3702.AT2G03800.1	3702.AT2G21170.1	3702.AT2G41530.1	3702.AT3G02720.1	3702.AT3G04520.1	3702.AT3G10850.1	3702.AT3G14990.1	3702.AT3G55440.1	3702.AT4G29120.1	3702.AT4G34180.1	3702.AT5G24760.1	3702.AT5G48230.2	3702.AT5G61410.1	3702.AT5G63980.1	3702.AT5G63990.1 URH2	PDS1	GLX1	AT1G12050	IMPL1	GAD2	AT1G67280	AT1G71170	AT1G80360	NHO1	GSTZ1	GEK1	TIM	SFGH	DJ1D	THA2	GLY2	DJ1A	TPI	AT4G29120	AT4G34180	AT5G24760	ACAT2	RPE	SAL1
GO Process GO:0009117 Nucleotide metabolic process 27 249 0.83 7.96e-12 3702.AT1G12000.1	3702.AT1G13440.1	3702.AT1G29880.1	3702.AT1G55090.1	3702.AT1G76550.1	3702.AT2G21170.1	3702.AT2G21330.1	3702.AT2G22570.1	3702.AT2G29560.1	3702.AT2G36530.1	3702.AT2G42910.1	3702.AT3G01390.2	3702.AT3G09820.1	3702.AT3G14990.1	3702.AT3G16950.2	3702.AT3G18030.1	3702.AT3G55440.1	3702.AT4G04040.1	3702.AT4G13720.1	3702.AT4G32840.1	3702.AT4G36940.1	3702.AT5G19150.1	3702.AT5G20070.1	3702.AT5G27450.2	3702.AT5G42740.1	3702.AT5G56630.1	3702.AT5G63310.1 AT1G12000	GAPC2	AT1G29880	AT1G55090	AT1G76550	TIM	FBA1	NIC1	ENOC	LOS2	AT2G42910	VMA10	At3g09820	DJ1A	LPD1	HAL3A	TPI	MEE51	AT4G13720	PFK6	NAPRT1	AT5G19150	NUDX19	MK
GO Process GO:0042221 Response to chemical 95 2590 0.35 8.00e-12 3702.AT1G04410.1	3702.AT1G11840.6	3702.AT1G12000.1	3702.AT1G13440.1	3702.AT1G15930.1	3702.AT1G18080.1	3702.AT1G19570.1	3702.AT1G20450.1	3702.AT1G23190.1	3702.AT1G29880.1	3702.AT1G31340.1	3702.AT1G35580.2	3702.AT1G35720.1	3702.AT1G42970.1	3702.AT1G43670.1	3702.AT1G44170.2	3702.AT1G50480.1	3702.AT1G51360.1	3702.AT1G52570.1	3702.AT1G54100.1	3702.AT1G56450.1	3702.AT1G60710.1	3702.AT1G62810.1	3702.AT1G70410.2	3702.AT1G74920.1	3702.AT1G76550.1	3702.AT1G78300.1	3702.AT1G78380.1	3702.AT1G80460.1	3702.AT2G02390.3	3702.AT2G16060.1	3702.AT2G17420.1	3702.AT2G21330.1	3702.AT2G22240.1	3702.AT2G22570.1	3702.AT2G27020.1	3702.AT2G29450.1	3702.AT2G30860.1	3702.AT2G30870.1	3702.AT2G35840.3	3702.AT2G36530.1	3702.AT2G40300.1	3702.AT2G41530.1	3702.AT2G45820.1	3702.AT3G03780.1	3702.AT3G09820.1	3702.AT3G12490.2	3702.AT3G12500.1	3702.AT3G13235.1	3702.AT3G14990.1
GO Process GO:1901605 Alpha-amino acid metabolic process 28 280 0.79 1.58e-11 3702.AT1G06570.1	3702.AT1G12050.1	3702.AT1G15710.1	3702.AT1G50110.1	3702.AT1G65960.2	3702.AT1G69370.1	3702.AT1G71170.1	3702.AT1G80360.1	3702.AT2G02390.3	3702.AT2G03800.1	3702.AT2G37500.1	3702.AT3G03780.1	3702.AT3G04520.1	3702.AT3G49680.1	3702.AT3G54640.1	3702.AT3G60880.2	3702.AT4G02610.1	3702.AT4G13430.1	3702.AT4G17830.2	3702.AT4G19710.2	3702.AT4G27070.1	3702.AT4G29120.1	3702.AT4G34180.1	3702.AT4G34200.1	3702.AT5G10330.1	3702.AT5G14800.1	3702.AT5G19550.1	3702.AT5G56760.1 PDS1	AT1G12050	AT1G15710	AT1G50110	GAD2	CM3	AT1G71170	AT1G80360	GSTZ1	GEK1	AT2G37500	MS2	THA2	BCAT3	TSA2	DHDPS1	AT4G02610	IIL1	AT4G17830	AKHSDH2	TSB2	AT4G29120	AT4G34180
GO Process GO:0008652 Cellular amino acid biosynthetic process 24 198 0.87 2.05e-11 3702.AT1G15710.1	3702.AT1G50110.1	3702.AT1G69370.1	3702.AT2G37500.1	3702.AT3G03780.1	3702.AT3G04520.1	3702.AT3G06350.1	3702.AT3G29200.1	3702.AT3G49680.1	3702.AT3G54640.1	3702.AT3G60880.2	3702.AT4G02610.1	3702.AT4G13430.1	3702.AT4G17830.2	3702.AT4G19710.2	3702.AT4G27070.1	3702.AT4G34200.1	3702.AT5G04590.1	3702.AT5G10330.1	3702.AT5G10870.1	3702.AT5G14800.1	3702.AT5G56760.1	3702.AT5G64370.1	3702.AT5G66120.2 AT1G15710	AT1G50110	CM3	AT2G37500	MS2	THA2	MEE32	CM1	BCAT3	TSA2	DHDPS1	AT4G02610	IIL1	AT4G17830	AKHSDH2	TSB2	EDA9	SIR	HPA1	CM2	P5CR	SERAT1;1	BETA-UP	AT5G66120
GO Process GO:0015977 Carbon fixation 12 25 1.47 3.06e-11 3702.AT1G12900.1	3702.AT1G32060.1	3702.AT1G42970.1	3702.AT1G53310.3	3702.AT1G67090.1	3702.AT2G21170.1	3702.AT2G42600.1	3702.AT3G04790.1	3702.AT3G14940.1	3702.AT3G55800.1	3702.AT3G60750.1	3702.AT5G61410.1 GAPA-2	PRK	GAPB	PPC1	RBCS1A	TIM	PPC2	EMB3119	PPC3	SBPASE	AT3G60750	RPE
GO Process GO:0046394 Carboxylic acid biosynthetic process 35 468 0.66 3.72e-11 3702.AT1G15710.1	3702.AT1G26570.1	3702.AT1G50110.1	3702.AT1G50480.1	3702.AT1G69370.1	3702.AT2G27150.2	3702.AT2G37500.1	3702.AT2G43710.1	3702.AT3G02720.1	3702.AT3G03780.1	3702.AT3G04520.1	3702.AT3G06350.1	3702.AT3G14990.1	3702.AT3G25780.1	3702.AT3G29200.1	3702.AT3G29360.1	3702.AT3G43600.1	3702.AT3G49680.1	3702.AT3G54640.1	3702.AT3G60880.2	3702.AT4G02610.1	3702.AT4G13430.1	3702.AT4G17830.2	3702.AT4G19710.2	3702.AT4G27070.1	3702.AT4G34200.1	3702.AT5G04590.1	3702.AT5G10330.1	3702.AT5G10870.1	3702.AT5G13520.1	3702.AT5G14800.1	3702.AT5G15490.1	3702.AT5G56760.1	3702.AT5G64370.1	3702.AT5G66120.2 AT1G15710	UGD1	AT1G50110	THFS	CM3	AAO3	AT2G37500	SSI2	DJ1D	MS2	THA2	MEE32	DJ1A	AOC3	CM1	UGD2
GO Process GO:1901135 Carbohydrate derivative metabolic process 40 610 0.61 3.72e-11 3702.AT1G05620.1	3702.AT1G12000.1	3702.AT1G13440.1	3702.AT1G17890.1	3702.AT1G26570.1	3702.AT1G43670.1	3702.AT1G50110.1	3702.AT1G76550.1	3702.AT1G80460.1	3702.AT2G21170.1	3702.AT2G21330.1	3702.AT2G28100.1	3702.AT2G29560.1	3702.AT2G36530.1	3702.AT2G42910.1	3702.AT3G01390.2	3702.AT3G04790.1	3702.AT3G09820.1	3702.AT3G12500.1	3702.AT3G16950.2	3702.AT3G18030.1	3702.AT3G26720.1	3702.AT3G29360.1	3702.AT3G46440.2	3702.AT3G51160.1	3702.AT3G55440.1	3702.AT3G55800.1	3702.AT3G60750.1	3702.AT4G04040.1	3702.AT4G13430.1	3702.AT4G32840.1	3702.AT5G15490.1	3702.AT5G16510.2	3702.AT5G27450.2	3702.AT5G42740.1	3702.AT5G56630.1	3702.AT5G59290.2	3702.AT5G60600.1	3702.AT5G61410.1	3702.AT5G63310.1 URH2	AT1G12000	GAPC2	At1g17890	UGD1	FBP	AT1G50110	AT1G76550	NHO1	TIM	FBA1
GO Process GO:0050896 Response to stimulus 147 5174 0.24 1.15e-10 3702.AT1G02170.1	3702.AT1G04410.1	3702.AT1G11840.6	3702.AT1G12000.1	3702.AT1G13440.1	3702.AT1G14320.1	3702.AT1G15930.1	3702.AT1G18080.1	3702.AT1G19570.1	3702.AT1G20020.1	3702.AT1G20450.1	3702.AT1G23190.1	3702.AT1G29880.1	3702.AT1G31190.1	3702.AT1G31340.1	3702.AT1G32060.1	3702.AT1G35580.2	3702.AT1G35720.1	3702.AT1G42970.1	3702.AT1G43670.1	3702.AT1G43890.1	3702.AT1G44170.2	3702.AT1G50170.1	3702.AT1G50480.1	3702.AT1G51360.1	3702.AT1G52570.1	3702.AT1G53310.3	3702.AT1G54100.1	3702.AT1G55490.2	3702.AT1G56450.1	3702.AT1G60710.1	3702.AT1G62810.1	3702.AT1G62820.1	3702.AT1G67090.1	3702.AT1G67280.1	3702.AT1G69370.1	3702.AT1G70410.2	3702.AT1G72260.1	3702.AT1G74920.1	3702.AT1G76550.1	3702.AT1G78300.1	3702.AT1G78380.1	3702.AT1G79210.2	3702.AT1G80360.1	3702.AT1G80460.1	3702.AT2G02390.3	3702.AT2G02990.1	3702.AT2G16060.1	3702.AT2G17420.1	3702.AT2G21330.1
GO Process GO:0006081 Cellular aldehyde metabolic process 14 53 1.21 2.33e-10 3702.AT1G11840.6	3702.AT1G44170.2	3702.AT1G54100.1	3702.AT1G67280.1	3702.AT2G21170.1	3702.AT2G41530.1	3702.AT3G02720.1	3702.AT3G10850.1	3702.AT3G14990.1	3702.AT3G16050.1	3702.AT3G55440.1	3702.AT5G01410.1	3702.AT5G24760.1	3702.AT5G60600.1 GLX1	ALDH3H1	ALDH7B4	AT1G67280	TIM	SFGH	DJ1D	GLY2	DJ1A	PDX1.2	TPI	RSR4	AT5G24760	HDS
GO Process GO:0006139 Nucleobase-containing compound metabolic process 70 1736 0.4 4.07e-10 3702.AT1G03330.1	3702.AT1G05620.1	3702.AT1G08360.1	3702.AT1G12000.1	3702.AT1G13440.1	3702.AT1G17890.1	3702.AT1G26570.1	3702.AT1G28350.1	3702.AT1G29880.1	3702.AT1G36310.1	3702.AT1G50480.1	3702.AT1G52160.1	3702.AT1G55090.1	3702.AT1G76550.1	3702.AT1G76860.1	3702.AT2G01250.1	3702.AT2G02990.1	3702.AT2G03800.1	3702.AT2G09990.1	3702.AT2G21170.1	3702.AT2G21330.1	3702.AT2G22570.1	3702.AT2G27040.2	3702.AT2G27530.1	3702.AT2G29560.1	3702.AT2G33840.1	3702.AT2G34260.1	3702.AT2G36530.1	3702.AT2G39390.1	3702.AT2G42910.1	3702.AT2G43810.1	3702.AT2G44120.2	3702.AT3G01390.2	3702.AT3G02540.1	3702.AT3G02560.2	3702.AT3G09500.1	3702.AT3G09820.1	3702.AT3G13580.3	3702.AT3G14990.1	3702.AT3G16950.2	3702.AT3G18030.1	3702.AT3G29360.1	3702.AT3G46440.2	3702.AT3G51160.1	3702.AT3G52580.1	3702.AT3G55440.1	3702.AT3G55620.1	3702.AT3G62870.1	3702.AT4G04040.1	3702.AT4G05420.1
GO Process GO:0009072 Aromatic amino acid family metabolic process 15 73 1.1 8.38e-10 3702.AT1G06570.1	3702.AT1G12050.1	3702.AT1G15710.1	3702.AT1G69370.1	3702.AT1G80360.1	3702.AT2G02390.3	3702.AT3G06350.1	3702.AT3G29200.1	3702.AT3G54640.1	3702.AT4G02610.1	3702.AT4G27070.1	3702.AT4G34180.1	3702.AT5G10330.1	3702.AT5G10870.1	3702.AT5G66120.2 PDS1	AT1G12050	AT1G15710	CM3	AT1G80360	GSTZ1	MEE32	CM1	TSA2	AT4G02610	TSB2	AT4G34180	HPA1	CM2	AT5G66120
GO Process GO:0072521 Purine-containing compound metabolic process 22 210 0.81 2.39e-09 3702.AT1G05620.1	3702.AT1G12000.1	3702.AT1G13440.1	3702.AT1G50480.1	3702.AT1G76550.1	3702.AT2G21170.1	3702.AT2G21330.1	3702.AT2G29560.1	3702.AT2G36530.1	3702.AT2G42910.1	3702.AT3G01390.2	3702.AT3G09820.1	3702.AT3G16950.2	3702.AT3G18030.1	3702.AT3G55440.1	3702.AT4G04040.1	3702.AT4G32840.1	3702.AT4G34890.1	3702.AT5G27450.2	3702.AT5G42740.1	3702.AT5G56630.1	3702.AT5G63310.1 URH2	AT1G12000	GAPC2	THFS	AT1G76550	TIM	FBA1	ENOC	LOS2	AT2G42910	VMA10	At3g09820	LPD1	HAL3A	TPI	MEE51	PFK6	XDH1	MK	AT5G42740	PFK7	NDPK2
GO Process GO:0010467 Gene expression 55 1235 0.44 3.05e-09 3702.AT1G03330.1	3702.AT1G08360.1	3702.AT1G14320.1	3702.AT1G15930.1	3702.AT1G18080.1	3702.AT1G18540.1	3702.AT1G28350.1	3702.AT1G29880.1	3702.AT1G33120.1	3702.AT1G36310.1	3702.AT1G52160.1	3702.AT1G74050.1	3702.AT1G76860.1	3702.AT2G01250.1	3702.AT2G09990.1	3702.AT2G19730.3	3702.AT2G27040.2	3702.AT2G27530.1	3702.AT2G27720.2	3702.AT2G33840.1	3702.AT2G34260.1	3702.AT2G34480.1	3702.AT2G39390.1	3702.AT2G40590.1	3702.AT2G43810.1	3702.AT2G44120.2	3702.AT3G02560.2	3702.AT3G04400.1	3702.AT3G07110.2	3702.AT3G09500.1	3702.AT3G10610.1	3702.AT3G13580.3	3702.AT3G16080.1	3702.AT3G27850.1	3702.AT3G52580.1	3702.AT3G53430.1	3702.AT3G53870.1	3702.AT3G55620.1	3702.AT3G60245.1	3702.AT3G61110.1	3702.AT3G62250.1	3702.AT3G62870.1	3702.AT4G00810.1	3702.AT4G15000.1	3702.AT4G18100.1	3702.AT4G27490.1	3702.AT4G29410.1	3702.AT4G36130.1	3702.AT5G02770.1	3702.AT5G03850.1
GO Process GO:0019438 Aromatic compound biosynthetic process 39 692 0.54 4.86e-09 3702.AT1G02880.3	3702.AT1G15710.1	3702.AT1G17890.1	3702.AT1G26570.1	3702.AT1G29880.1	3702.AT1G50170.1	3702.AT1G50480.1	3702.AT1G55090.1	3702.AT1G69370.1	3702.AT1G72680.1	3702.AT2G22570.1	3702.AT2G42910.1	3702.AT3G01390.2	3702.AT3G06350.1	3702.AT3G09820.1	3702.AT3G16050.1	3702.AT3G16950.2	3702.AT3G16990.1	3702.AT3G18030.1	3702.AT3G29200.1	3702.AT3G29360.1	3702.AT3G46440.2	3702.AT3G51160.1	3702.AT3G54640.1	3702.AT4G02610.1	3702.AT4G13720.1	3702.AT4G27070.1	3702.AT4G36940.1	3702.AT5G01410.1	3702.AT5G05340.1	3702.AT5G08280.1	3702.AT5G10330.1	3702.AT5G10870.1	3702.AT5G15490.1	3702.AT5G20070.1	3702.AT5G27470.1	3702.AT5G59290.2	3702.AT5G63310.1	3702.AT5G66120.2 TPK1	AT1G15710	At1g17890	UGD1	AT1G29880	SIRB	THFS	AT1G55090	CM3	CADG	NIC1	AT2G42910
GO Process GO:0042273 Ribosomal large subunit biogenesis 14 74 1.07 1.01e-08 3702.AT1G08360.1	3702.AT1G14320.1	3702.AT1G18540.1	3702.AT1G74050.1	3702.AT2G01250.1	3702.AT2G27530.1	3702.AT2G39390.1	3702.AT2G44120.2	3702.AT3G09500.1	3702.AT3G13580.3	3702.AT3G53430.1	3702.AT3G55620.1	3702.AT3G62870.1	3702.AT5G67510.1 AT1G08360	SAC52	AT1G18540	AT1G74050	AT2G01250	PGY1	AT2G39390	AT2G44120	AT3G09500	AT3G13580	AT3G53430	eIF6A	AT3G62870	AT5G67510
GO Process GO:0042254 Ribosome biogenesis 23 255 0.75 1.24e-08 3702.AT1G08360.1	3702.AT1G14320.1	3702.AT1G18080.1	3702.AT1G18540.1	3702.AT1G74050.1	3702.AT2G01250.1	3702.AT2G09990.1	3702.AT2G27530.1	3702.AT2G34260.1	3702.AT2G39390.1	3702.AT2G43810.1	3702.AT2G44120.2	3702.AT3G02560.2	3702.AT3G09500.1	3702.AT3G13580.3	3702.AT3G52580.1	3702.AT3G53430.1	3702.AT3G55620.1	3702.AT3G61110.1	3702.AT3G62870.1	3702.AT4G27490.1	3702.AT5G03850.1	3702.AT5G67510.1 AT1G08360	SAC52	ATARCA	AT1G18540	AT1G74050	AT2G01250	AT2G09990	PGY1	WDR55	AT2G39390	LSM6B	AT2G44120	AT3G02560	AT3G09500	AT3G13580	AT3G52580	AT3G53430	eIF6A	RS27A	AT3G62870	RRP41L	AT3G10090	AT5G67510
GO Process GO:0006090 Pyruvate metabolic process 14 77 1.05 1.55e-08 3702.AT1G12000.1	3702.AT1G13440.1	3702.AT1G76550.1	3702.AT2G21170.1	3702.AT2G21330.1	3702.AT2G29560.1	3702.AT2G36530.1	3702.AT3G16950.2	3702.AT3G55440.1	3702.AT4G04040.1	3702.AT4G32840.1	3702.AT5G42740.1	3702.AT5G56630.1	3702.AT5G60600.1 AT1G12000	GAPC2	AT1G76550	TIM	FBA1	ENOC	LOS2	LPD1	TPI	MEE51	PFK6	AT5G42740	PFK7	HDS
GO Process GO:1901362 Organic cyclic compound biosynthetic process 41 798 0.5 2.05e-08 3702.AT1G02880.3	3702.AT1G15710.1	3702.AT1G17890.1	3702.AT1G26570.1	3702.AT1G29880.1	3702.AT1G50170.1	3702.AT1G50480.1	3702.AT1G55090.1	3702.AT1G69370.1	3702.AT1G72680.1	3702.AT2G22570.1	3702.AT2G42910.1	3702.AT3G01390.2	3702.AT3G06350.1	3702.AT3G09820.1	3702.AT3G16050.1	3702.AT3G16950.2	3702.AT3G16990.1	3702.AT3G18030.1	3702.AT3G29200.1	3702.AT3G29360.1	3702.AT3G46440.2	3702.AT3G51160.1	3702.AT3G54640.1	3702.AT4G02610.1	3702.AT4G13720.1	3702.AT4G27070.1	3702.AT4G36940.1	3702.AT5G01410.1	3702.AT5G05340.1	3702.AT5G08280.1	3702.AT5G10330.1	3702.AT5G10870.1	3702.AT5G14800.1	3702.AT5G15490.1	3702.AT5G20070.1	3702.AT5G27450.2	3702.AT5G27470.1	3702.AT5G59290.2	3702.AT5G63310.1	3702.AT5G66120.2 TPK1	AT1G15710	At1g17890	UGD1	AT1G29880	SIRB	THFS	AT1G55090	CM3	CADG
GO Process GO:0034660 ncRNA metabolic process 24 292 0.71 2.71e-08 3702.AT1G08360.1	3702.AT1G28350.1	3702.AT1G29880.1	3702.AT1G36310.1	3702.AT1G52160.1	3702.AT2G01250.1	3702.AT2G03800.1	3702.AT2G09990.1	3702.AT2G27530.1	3702.AT2G33840.1	3702.AT2G34260.1	3702.AT2G39390.1	3702.AT2G43810.1	3702.AT2G44120.2	3702.AT3G02560.2	3702.AT3G09500.1	3702.AT3G13580.3	3702.AT3G52580.1	3702.AT3G55620.1	3702.AT3G62870.1	3702.AT4G27490.1	3702.AT5G03850.1	3702.AT5G15810.1	3702.AT5G27470.1 AT1G08360	AT1G28350	AT1G29880	AT1G36310	TRZ3	AT2G01250	GEK1	AT2G09990	PGY1	AT2G33840	WDR55	AT2G39390	LSM6B	AT2G44120	AT3G02560	AT3G09500	AT3G13580	AT3G52580	eIF6A	AT3G62870	RRP41L	AT3G10090	AT5G15810	AT5G27470
GO Process GO:0019538 Protein metabolic process 96 3075 0.28 2.83e-08 3702.AT1G02170.1	3702.AT1G05350.1	3702.AT1G08360.1	3702.AT1G11910.1	3702.AT1G13060.2	3702.AT1G14320.1	3702.AT1G15000.1	3702.AT1G15930.1	3702.AT1G18080.1	3702.AT1G18540.1	3702.AT1G19570.1	3702.AT1G21720.1	3702.AT1G28350.1	3702.AT1G29880.1	3702.AT1G31340.1	3702.AT1G33120.1	3702.AT1G56450.1	3702.AT1G74050.1	3702.AT1G77440.1	3702.AT1G77710.1	3702.AT1G78680.1	3702.AT1G79210.2	3702.AT1G79690.1	3702.AT2G05840.1	3702.AT2G09990.1	3702.AT2G14260.1	3702.AT2G19730.3	3702.AT2G22475.1	3702.AT2G22970.3	3702.AT2G27020.1	3702.AT2G27040.2	3702.AT2G27530.1	3702.AT2G27720.2	3702.AT2G28100.1	3702.AT2G33840.1	3702.AT2G34480.1	3702.AT2G39390.1	3702.AT2G40590.1	3702.AT3G02540.1	3702.AT3G02560.2	3702.AT3G04400.1	3702.AT3G06540.1	3702.AT3G07110.2	3702.AT3G09500.1	3702.AT3G10610.1	3702.AT3G13235.1	3702.AT3G14990.1	3702.AT3G16080.1	3702.AT3G22110.1	3702.AT3G26340.1
GO Process GO:0006508 Proteolysis 39 745 0.51 3.29e-08 3702.AT1G02170.1	3702.AT1G11910.1	3702.AT1G13060.2	3702.AT1G15000.1	3702.AT1G21720.1	3702.AT1G31340.1	3702.AT1G56450.1	3702.AT1G77440.1	3702.AT1G78680.1	3702.AT1G79210.2	3702.AT1G79690.1	3702.AT2G05840.1	3702.AT2G14260.1	3702.AT2G22970.3	3702.AT2G27020.1	3702.AT3G02540.1	3702.AT3G13235.1	3702.AT3G22110.1	3702.AT3G26340.1	3702.AT3G27430.2	3702.AT3G51260.1	3702.AT3G53970.1	3702.AT3G60820.1	3702.AT3G62250.1	3702.AT4G05420.1	3702.AT4G12910.1	3702.AT4G14570.1	3702.AT4G14800.2	3702.AT4G20430.1	3702.AT4G20850.1	3702.AT4G31300.2	3702.AT4G33090.1	3702.AT5G08100.1	3702.AT5G13520.1	3702.AT5G35590.1	3702.AT5G38470.1	3702.AT5G42790.1	3702.AT5G67360.1	3702.ATCG00670.1 MC1	APA1	PBE1	scpl50	PBC1	RUB1	PBG1	PBC2	GGH2	AT1G79210	NUDT3	At2g05840
GO Process GO:0006006 Glucose metabolic process 11 41 1.22 3.68e-08 3702.AT1G12900.1	3702.AT1G13440.1	3702.AT1G23190.1	3702.AT1G42970.1	3702.AT1G43670.1	3702.AT1G70730.3	3702.AT2G21170.1	3702.AT2G21330.1	3702.AT3G55440.1	3702.AT3G55800.1	3702.AT5G42740.1 GAPA-2	GAPC2	PGM3	GAPB	FBP	PGM2	TIM	FBA1	TPI	SBPASE	AT5G42740
GO Process GO:0006165 Nucleoside diphosphate phosphorylation 13 68 1.07 3.68e-08 3702.AT1G12000.1	3702.AT1G13440.1	3702.AT1G76550.1	3702.AT2G21170.1	3702.AT2G21330.1	3702.AT2G29560.1	3702.AT2G36530.1	3702.AT3G55440.1	3702.AT4G04040.1	3702.AT4G32840.1	3702.AT5G42740.1	3702.AT5G56630.1	3702.AT5G63310.1 AT1G12000	GAPC2	AT1G76550	TIM	FBA1	ENOC	LOS2	TPI	MEE51	PFK6	AT5G42740	PFK7	NDPK2
GO Process GO:1901615 Organic hydroxy compound metabolic process 24 299 0.7 3.90e-08 3702.AT1G11840.6	3702.AT1G12050.1	3702.AT1G31190.1	3702.AT1G67280.1	3702.AT1G80460.1	3702.AT2G02390.3	3702.AT2G21170.1	3702.AT2G22240.1	3702.AT2G27150.2	3702.AT3G02720.1	3702.AT3G06350.1	3702.AT3G10850.1	3702.AT3G14990.1	3702.AT3G16050.1	3702.AT3G43600.1	3702.AT3G55440.1	3702.AT4G35830.1	3702.AT4G39800.1	3702.AT5G01410.1	3702.AT5G16760.1	3702.AT5G27450.2	3702.AT5G48230.2	3702.AT5G63980.1	3702.AT5G63990.1 GLX1	AT1G12050	IMPL1	AT1G67280	NHO1	GSTZ1	TIM	MIPS2	AAO3	DJ1D	MEE32	GLY2	DJ1A	PDX1.2	AAO2	TPI	At4g35830	MIPS1	RSR4	ITPK1	MK	ACAT2	SAL1	AT5G63990
GO Process GO:0006091 Generation of precursor metabolites and energy 28 409 0.63 4.15e-08 3702.AT1G04410.1	3702.AT1G12000.1	3702.AT1G13440.1	3702.AT1G53310.3	3702.AT1G76550.1	3702.AT2G04700.1	3702.AT2G21170.1	3702.AT2G21330.1	3702.AT2G25060.1	3702.AT2G27150.2	3702.AT2G29560.1	3702.AT2G36530.1	3702.AT2G42600.1	3702.AT3G04790.1	3702.AT3G14940.1	3702.AT3G43600.1	3702.AT3G46970.1	3702.AT3G55440.1	3702.AT3G60750.1	3702.AT4G04040.1	3702.AT4G32840.1	3702.AT4G34890.1	3702.AT4G35830.1	3702.AT5G20500.1	3702.AT5G40370.2	3702.AT5G42740.1	3702.AT5G56630.1	3702.AT5G61410.1 c-NAD-MDH1	AT1G12000	GAPC2	PPC1	AT1G76550	AT2G04700	TIM	FBA1	ENODL14	AAO3	ENOC	LOS2	PPC2	EMB3119	PPC3	AAO2	PHS2	TPI	AT3G60750	MEE51	PFK6	XDH1	At4g35830
GO Process GO:0019253 Reductive pentose-phosphate cycle 9 21 1.42 4.50e-08 3702.AT1G12900.1	3702.AT1G32060.1	3702.AT1G42970.1	3702.AT1G67090.1	3702.AT2G21170.1	3702.AT3G04790.1	3702.AT3G55800.1	3702.AT3G60750.1	3702.AT5G61410.1 GAPA-2	PRK	GAPB	RBCS1A	TIM	EMB3119	SBPASE	AT3G60750	RPE
GO Process GO:0043161 Proteasome-mediated ubiquitin-dependent protein catabolic process 19 185 0.8 5.62e-08 3702.AT1G13060.2	3702.AT1G21720.1	3702.AT1G56450.1	3702.AT1G77440.1	3702.AT1G79210.2	3702.AT2G05840.1	3702.AT2G27020.1	3702.AT3G02540.1	3702.AT3G22110.1	3702.AT3G26340.1	3702.AT3G27430.2	3702.AT3G51260.1	3702.AT3G60820.1	3702.AT4G05420.1	3702.AT4G14800.2	3702.AT4G31300.2	3702.AT5G35590.1	3702.AT5G38470.1	3702.AT5G42790.1 PBE1	PBC1	PBG1	PBC2	AT1G79210	At2g05840	PAG1	RAD23C	PAC1	AT3G26340	PBB1	PAD1	PBF1	DDB1A	PBD2	PBA1	At5g35590	RAD23D	PAF1
GO Process GO:0006096 Glycolytic process 12 59 1.1 8.29e-08 3702.AT1G12000.1	3702.AT1G13440.1	3702.AT1G76550.1	3702.AT2G21170.1	3702.AT2G21330.1	3702.AT2G29560.1	3702.AT2G36530.1	3702.AT3G55440.1	3702.AT4G04040.1	3702.AT4G32840.1	3702.AT5G42740.1	3702.AT5G56630.1 AT1G12000	GAPC2	AT1G76550	TIM	FBA1	ENOC	LOS2	TPI	MEE51	PFK6	AT5G42740	PFK7
GO Process GO:0006163 Purine nucleotide metabolic process 19 192 0.79 9.27e-08 3702.AT1G12000.1	3702.AT1G13440.1	3702.AT1G76550.1	3702.AT2G21170.1	3702.AT2G21330.1	3702.AT2G29560.1	3702.AT2G36530.1	3702.AT2G42910.1	3702.AT3G01390.2	3702.AT3G09820.1	3702.AT3G16950.2	3702.AT3G18030.1	3702.AT3G55440.1	3702.AT4G04040.1	3702.AT4G32840.1	3702.AT5G27450.2	3702.AT5G42740.1	3702.AT5G56630.1	3702.AT5G63310.1 AT1G12000	GAPC2	AT1G76550	TIM	FBA1	ENOC	LOS2	AT2G42910	VMA10	At3g09820	LPD1	HAL3A	TPI	MEE51	PFK6	MK	AT5G42740	PFK7	NDPK2
GO Process GO:0000470 Maturation of lsu-rrna 9 25 1.35 1.31e-07 3702.AT1G08360.1	3702.AT2G01250.1	3702.AT2G27530.1	3702.AT2G39390.1	3702.AT2G44120.2	3702.AT3G09500.1	3702.AT3G13580.3	3702.AT3G55620.1	3702.AT3G62870.1 AT1G08360	AT2G01250	PGY1	AT2G39390	AT2G44120	AT3G09500	AT3G13580	eIF6A	AT3G62870
GO Process GO:0009150 Purine ribonucleotide metabolic process 18 176 0.8 1.44e-07 3702.AT1G12000.1	3702.AT1G13440.1	3702.AT1G76550.1	3702.AT2G21170.1	3702.AT2G21330.1	3702.AT2G29560.1	3702.AT2G36530.1	3702.AT3G01390.2	3702.AT3G09820.1	3702.AT3G16950.2	3702.AT3G18030.1	3702.AT3G55440.1	3702.AT4G04040.1	3702.AT4G32840.1	3702.AT5G27450.2	3702.AT5G42740.1	3702.AT5G56630.1	3702.AT5G63310.1 AT1G12000	GAPC2	AT1G76550	TIM	FBA1	ENOC	LOS2	VMA10	At3g09820	LPD1	HAL3A	TPI	MEE51	PFK6	MK	AT5G42740	PFK7	NDPK2
GO Process GO:0006793 Phosphorus metabolic process 63 1723 0.35 1.50e-07 3702.AT1G01050.1	3702.AT1G02880.3	3702.AT1G12000.1	3702.AT1G13440.1	3702.AT1G17890.1	3702.AT1G26570.1	3702.AT1G29880.1	3702.AT1G31190.1	3702.AT1G32060.1	3702.AT1G43670.1	3702.AT1G52570.1	3702.AT1G55090.1	3702.AT1G76550.1	3702.AT1G80460.1	3702.AT2G18230.1	3702.AT2G21170.1	3702.AT2G21330.1	3702.AT2G22240.1	3702.AT2G22570.1	3702.AT2G27190.1	3702.AT2G29560.1	3702.AT2G35840.3	3702.AT2G36530.1	3702.AT2G42910.1	3702.AT3G01390.2	3702.AT3G03520.1	3702.AT3G04790.1	3702.AT3G09820.1	3702.AT3G14990.1	3702.AT3G16050.1	3702.AT3G16950.2	3702.AT3G16990.1	3702.AT3G18030.1	3702.AT3G29360.1	3702.AT3G46440.2	3702.AT3G51160.1	3702.AT3G53620.1	3702.AT3G55440.1	3702.AT3G55800.1	3702.AT3G60750.1	3702.AT4G04040.1	3702.AT4G13720.1	3702.AT4G19710.2	3702.AT4G32840.1	3702.AT4G36940.1	3702.AT4G39800.1	3702.AT5G01410.1	3702.AT5G15490.1	3702.AT5G16510.2	3702.AT5G16760.1
GO Process GO:0015979 Photosynthesis 20 225 0.74 1.70e-07 3702.AT1G12000.1	3702.AT1G12900.1	3702.AT1G20020.1	3702.AT1G30510.2	3702.AT1G32060.1	3702.AT1G42970.1	3702.AT1G43670.1	3702.AT1G53310.3	3702.AT1G67090.1	3702.AT1G76550.1	3702.AT2G21170.1	3702.AT2G40300.1	3702.AT2G42600.1	3702.AT3G04790.1	3702.AT3G14940.1	3702.AT3G55800.1	3702.AT3G60750.1	3702.AT4G04040.1	3702.AT4G05390.1	3702.AT5G61410.1 AT1G12000	GAPA-2	FNR2	RFNR2	PRK	GAPB	FBP	PPC1	RBCS1A	AT1G76550	TIM	FER4	PPC2	EMB3119	PPC3	SBPASE	AT3G60750	MEE51	RFNR1	RPE
GO Process GO:0019693 Ribose phosphate metabolic process 19 202 0.76 1.76e-07 3702.AT1G12000.1	3702.AT1G13440.1	3702.AT1G76550.1	3702.AT2G21170.1	3702.AT2G21330.1	3702.AT2G29560.1	3702.AT2G36530.1	3702.AT2G42910.1	3702.AT3G01390.2	3702.AT3G09820.1	3702.AT3G16950.2	3702.AT3G18030.1	3702.AT3G55440.1	3702.AT4G04040.1	3702.AT4G32840.1	3702.AT5G27450.2	3702.AT5G42740.1	3702.AT5G56630.1	3702.AT5G63310.1 AT1G12000	GAPC2	AT1G76550	TIM	FBA1	ENOC	LOS2	AT2G42910	VMA10	At3g09820	LPD1	HAL3A	TPI	MEE51	PFK6	MK	AT5G42740	PFK7	NDPK2
GO Process GO:1901607 Alpha-amino acid biosynthetic process 18 179 0.79 1.76e-07 3702.AT1G15710.1	3702.AT1G50110.1	3702.AT1G69370.1	3702.AT2G37500.1	3702.AT3G03780.1	3702.AT3G04520.1	3702.AT3G49680.1	3702.AT3G54640.1	3702.AT3G60880.2	3702.AT4G02610.1	3702.AT4G13430.1	3702.AT4G17830.2	3702.AT4G19710.2	3702.AT4G27070.1	3702.AT4G34200.1	3702.AT5G10330.1	3702.AT5G14800.1	3702.AT5G56760.1 AT1G15710	AT1G50110	CM3	AT2G37500	MS2	THA2	BCAT3	TSA2	DHDPS1	AT4G02610	IIL1	AT4G17830	AKHSDH2	TSB2	EDA9	HPA1	P5CR	SERAT1;1
GO Process GO:0005996 Monosaccharide metabolic process 17 159 0.82 2.03e-07 3702.AT1G12900.1	3702.AT1G13440.1	3702.AT1G23190.1	3702.AT1G42970.1	3702.AT1G43670.1	3702.AT1G70730.3	3702.AT2G21170.1	3702.AT2G21330.1	3702.AT2G28100.1	3702.AT3G26720.1	3702.AT3G46440.2	3702.AT3G55440.1	3702.AT3G55800.1	3702.AT5G42740.1	3702.AT5G49650.1	3702.AT5G59290.2	3702.AT5G61410.1 GAPA-2	GAPC2	PGM3	GAPB	FBP	PGM2	TIM	FBA1	FUC1	AT3G26720	UXS5	TPI	SBPASE	AT5G42740	XK-2	UXS3	RPE
GO Process GO:0032787 Monocarboxylic acid metabolic process 28 456 0.58 3.00e-07 3702.AT1G11840.6	3702.AT1G12000.1	3702.AT1G12050.1	3702.AT1G13440.1	3702.AT1G67280.1	3702.AT1G76550.1	3702.AT2G02390.3	3702.AT2G21170.1	3702.AT2G21330.1	3702.AT2G27150.2	3702.AT2G29560.1	3702.AT2G36530.1	3702.AT2G43710.1	3702.AT3G02720.1	3702.AT3G06350.1	3702.AT3G10850.1	3702.AT3G14990.1	3702.AT3G16950.2	3702.AT3G25780.1	3702.AT3G43600.1	3702.AT3G55440.1	3702.AT3G63170.1	3702.AT4G04040.1	3702.AT4G32840.1	3702.AT5G42740.1	3702.AT5G48230.2	3702.AT5G56630.1	3702.AT5G60600.1 GLX1	AT1G12000	AT1G12050	GAPC2	AT1G67280	AT1G76550	GSTZ1	TIM	FBA1	AAO3	ENOC	LOS2	SSI2	DJ1D	MEE32	GLY2	DJ1A	LPD1	AOC3	AAO2	TPI	FAP1	MEE51
GO Process GO:0018130 Heterocycle biosynthetic process 33 635 0.51 6.24e-07 3702.AT1G02880.3	3702.AT1G17890.1	3702.AT1G26570.1	3702.AT1G29880.1	3702.AT1G50170.1	3702.AT1G50480.1	3702.AT1G55090.1	3702.AT1G69370.1	3702.AT2G22570.1	3702.AT2G42910.1	3702.AT3G01390.2	3702.AT3G09820.1	3702.AT3G16050.1	3702.AT3G16950.2	3702.AT3G16990.1	3702.AT3G18030.1	3702.AT3G29360.1	3702.AT3G46440.2	3702.AT3G51160.1	3702.AT3G54640.1	3702.AT4G02610.1	3702.AT4G13720.1	3702.AT4G27070.1	3702.AT4G36940.1	3702.AT5G01410.1	3702.AT5G08280.1	3702.AT5G10330.1	3702.AT5G14800.1	3702.AT5G15490.1	3702.AT5G20070.1	3702.AT5G27470.1	3702.AT5G59290.2	3702.AT5G63310.1 TPK1	At1g17890	UGD1	AT1G29880	SIRB	THFS	AT1G55090	CM3	NIC1	AT2G42910	VMA10	At3g09820	PDX1.2	LPD1	AT3G16990	HAL3A	UGD2	UXS5
GO Process GO:0006364 rRNA processing 16 157 0.8 1.04e-06 3702.AT1G08360.1	3702.AT2G01250.1	3702.AT2G09990.1	3702.AT2G27530.1	3702.AT2G34260.1	3702.AT2G39390.1	3702.AT2G43810.1	3702.AT2G44120.2	3702.AT3G02560.2	3702.AT3G09500.1	3702.AT3G13580.3	3702.AT3G52580.1	3702.AT3G55620.1	3702.AT3G62870.1	3702.AT4G27490.1	3702.AT5G03850.1 AT1G08360	AT2G01250	AT2G09990	PGY1	WDR55	AT2G39390	LSM6B	AT2G44120	AT3G02560	AT3G09500	AT3G13580	AT3G52580	eIF6A	AT3G62870	RRP41L	AT3G10090
GO Process GO:0034470 ncRNA processing 19 232 0.7 1.31e-06 3702.AT1G08360.1	3702.AT1G36310.1	3702.AT1G52160.1	3702.AT2G01250.1	3702.AT2G09990.1	3702.AT2G27530.1	3702.AT2G34260.1	3702.AT2G39390.1	3702.AT2G43810.1	3702.AT2G44120.2	3702.AT3G02560.2	3702.AT3G09500.1	3702.AT3G13580.3	3702.AT3G52580.1	3702.AT3G55620.1	3702.AT3G62870.1	3702.AT4G27490.1	3702.AT5G03850.1	3702.AT5G15810.1 AT1G08360	AT1G36310	TRZ3	AT2G01250	AT2G09990	PGY1	WDR55	AT2G39390	LSM6B	AT2G44120	AT3G02560	AT3G09500	AT3G13580	AT3G52580	eIF6A	AT3G62870	RRP41L	AT3G10090	AT5G15810
GO Process GO:0090407 Organophosphate biosynthetic process 22 313 0.64 1.36e-06 3702.AT1G02880.3	3702.AT1G29880.1	3702.AT1G55090.1	3702.AT1G80460.1	3702.AT2G21170.1	3702.AT2G22240.1	3702.AT2G22570.1	3702.AT2G42910.1	3702.AT3G01390.2	3702.AT3G09820.1	3702.AT3G16050.1	3702.AT3G16950.2	3702.AT3G16990.1	3702.AT3G18030.1	3702.AT3G55440.1	3702.AT4G36940.1	3702.AT4G39800.1	3702.AT5G01410.1	3702.AT5G16760.1	3702.AT5G27450.2	3702.AT5G60600.1	3702.AT5G63310.1 TPK1	AT1G29880	AT1G55090	NHO1	TIM	MIPS2	NIC1	AT2G42910	VMA10	At3g09820	PDX1.2	LPD1	AT3G16990	HAL3A	TPI	NAPRT1	MIPS1	RSR4	ITPK1	MK	HDS	NDPK2
GO Process GO:0009636 Response to toxic substance 20 261 0.67 1.53e-06 3702.AT1G19570.1	3702.AT1G35720.1	3702.AT1G78380.1	3702.AT1G80460.1	3702.AT2G02390.3	3702.AT2G17420.1	3702.AT2G29450.1	3702.AT2G30860.1	3702.AT2G30870.1	3702.AT2G41530.1	3702.AT3G29200.1	3702.AT4G25100.1	3702.AT5G05340.1	3702.AT5G06290.1	3702.AT5G06730.1	3702.AT5G20500.1	3702.AT5G24760.1	3702.AT5G40370.2	3702.AT5G42980.1	3702.AT5G64120.1 DHAR1	ANNAT1	GSTU19	NHO1	GSTZ1	NTRA	GSTU5	GSTF9	GSTF10	SFGH	CM1	FSD1	PRX52	At5g06290	AT5G06730	AT5G20500	AT5G24760	GRXC2	TRX3	AT5G64120
GO Process GO:0009073 Aromatic amino acid family biosynthetic process 10 50 1.09 1.72e-06 3702.AT1G15710.1	3702.AT1G69370.1	3702.AT3G06350.1	3702.AT3G29200.1	3702.AT3G54640.1	3702.AT4G02610.1	3702.AT4G27070.1	3702.AT5G10330.1	3702.AT5G10870.1	3702.AT5G66120.2 AT1G15710	CM3	MEE32	CM1	TSA2	AT4G02610	TSB2	HPA1	CM2	AT5G66120
GO Process GO:0006979 Response to oxidative stress 24 380 0.59 2.07e-06 3702.AT1G13440.1	3702.AT1G19570.1	3702.AT1G35580.2	3702.AT1G50170.1	3702.AT1G78380.1	3702.AT2G17420.1	3702.AT2G29450.1	3702.AT2G40300.1	3702.AT3G12490.2	3702.AT3G23400.1	3702.AT3G25530.1	3702.AT4G25100.1	3702.AT4G34890.1	3702.AT5G01410.1	3702.AT5G05340.1	3702.AT5G06290.1	3702.AT5G06730.1	3702.AT5G16970.1	3702.AT5G20500.1	3702.AT5G40370.2	3702.AT5G52310.1	3702.AT5G59820.1	3702.AT5G63310.1	3702.AT5G64120.1 GAPC2	DHAR1	CINV1	SIRB	GSTU19	NTRA	GSTU5	FER4	CYSB	FIB4	GLYR1	FSD1	XDH1	RSR4	PRX52	At5g06290	AT5G06730	AER	AT5G20500	GRXC2	LTI78	RHL41	NDPK2	AT5G64120
GO Process GO:1990748 Cellular detoxification 16 171 0.76 2.89e-06 3702.AT1G19570.1	3702.AT1G35720.1	3702.AT1G78380.1	3702.AT2G02390.3	3702.AT2G17420.1	3702.AT2G30860.1	3702.AT2G41530.1	3702.AT3G29200.1	3702.AT4G25100.1	3702.AT5G05340.1	3702.AT5G06290.1	3702.AT5G06730.1	3702.AT5G20500.1	3702.AT5G24760.1	3702.AT5G40370.2	3702.AT5G64120.1 DHAR1	ANNAT1	GSTU19	GSTZ1	NTRA	GSTF9	SFGH	CM1	FSD1	PRX52	At5g06290	AT5G06730	AT5G20500	AT5G24760	GRXC2	AT5G64120
GO Process GO:0044262 Cellular carbohydrate metabolic process 25 420 0.57 3.09e-06 3702.AT1G01050.1	3702.AT1G12000.1	3702.AT1G31190.1	3702.AT1G35580.2	3702.AT1G43670.1	3702.AT1G76550.1	3702.AT1G80460.1	3702.AT2G21170.1	3702.AT2G22240.1	3702.AT2G35840.3	3702.AT3G43190.1	3702.AT3G46970.1	3702.AT3G55440.1	3702.AT3G55800.1	3702.AT4G04040.1	3702.AT4G32840.1	3702.AT4G39800.1	3702.AT5G10560.1	3702.AT5G16760.1	3702.AT5G20830.1	3702.AT5G49650.1	3702.AT5G56630.1	3702.AT5G61410.1	3702.AT5G63980.1	3702.AT5G63990.1 PPa1	AT1G12000	IMPL1	CINV1	FBP	AT1G76550	NHO1	TIM	MIPS2	AT2G35840	SUS4	PHS2	TPI	SBPASE	MEE51	PFK6	MIPS1	AT5G10560	ITPK1	SUS1	XK-2	PFK7	RPE	SAL1	AT5G63990
GO Process GO:0006950 Response to stress 89 3081 0.25 3.18e-06 3702.AT1G02170.1	3702.AT1G13440.1	3702.AT1G14320.1	3702.AT1G19570.1	3702.AT1G20020.1	3702.AT1G20450.1	3702.AT1G32060.1	3702.AT1G35580.2	3702.AT1G35720.1	3702.AT1G42970.1	3702.AT1G44170.2	3702.AT1G50170.1	3702.AT1G51360.1	3702.AT1G53310.3	3702.AT1G54100.1	3702.AT1G55490.2	3702.AT1G62820.1	3702.AT1G67090.1	3702.AT1G67280.1	3702.AT1G69370.1	3702.AT1G72260.1	3702.AT1G74920.1	3702.AT1G78380.1	3702.AT1G79210.2	3702.AT1G80460.1	3702.AT2G02990.1	3702.AT2G16060.1	3702.AT2G17420.1	3702.AT2G22240.1	3702.AT2G27020.1	3702.AT2G27040.2	3702.AT2G27190.1	3702.AT2G29450.1	3702.AT2G30860.1	3702.AT2G30870.1	3702.AT2G36530.1	3702.AT2G40300.1	3702.AT2G43710.1	3702.AT2G45820.1	3702.AT3G02540.1	3702.AT3G03520.1	3702.AT3G04790.1	3702.AT3G12490.2	3702.AT3G12500.1	3702.AT3G17210.1	3702.AT3G18030.1	3702.AT3G23400.1	3702.AT3G23490.1	3702.AT3G25530.1	3702.AT3G27850.1
GO Process GO:0009059 Macromolecule biosynthetic process 44 1096 0.39 3.18e-06 3702.AT1G08360.1	3702.AT1G14320.1	3702.AT1G15930.1	3702.AT1G18080.1	3702.AT1G18540.1	3702.AT1G26570.1	3702.AT1G28350.1	3702.AT1G29880.1	3702.AT1G33120.1	3702.AT1G74050.1	3702.AT2G09990.1	3702.AT2G19730.3	3702.AT2G27530.1	3702.AT2G27720.2	3702.AT2G33840.1	3702.AT2G34480.1	3702.AT2G39390.1	3702.AT2G40590.1	3702.AT3G02560.2	3702.AT3G04400.1	3702.AT3G07110.2	3702.AT3G09500.1	3702.AT3G10610.1	3702.AT3G16080.1	3702.AT3G27850.1	3702.AT3G29360.1	3702.AT3G52580.1	3702.AT3G53430.1	3702.AT3G53870.1	3702.AT3G55620.1	3702.AT3G55800.1	3702.AT3G60245.1	3702.AT3G61110.1	3702.AT3G62250.1	3702.AT4G00810.1	3702.AT4G15000.1	3702.AT4G18100.1	3702.AT4G29410.1	3702.AT4G36130.1	3702.AT5G03850.1	3702.AT5G15490.1	3702.AT5G27470.1	3702.AT5G27850.1	3702.AT5G67510.1 AT1G08360	SAC52	AT1G15930	ATARCA	AT1G18540	UGD1	AT1G28350
GO Process GO:0098754 Detoxification 18 224 0.7 3.57e-06 3702.AT1G19570.1	3702.AT1G35720.1	3702.AT1G78380.1	3702.AT2G02390.3	3702.AT2G17420.1	3702.AT2G29450.1	3702.AT2G30860.1	3702.AT2G30870.1	3702.AT2G41530.1	3702.AT3G29200.1	3702.AT4G25100.1	3702.AT5G05340.1	3702.AT5G06290.1	3702.AT5G06730.1	3702.AT5G20500.1	3702.AT5G24760.1	3702.AT5G40370.2	3702.AT5G64120.1 DHAR1	ANNAT1	GSTU19	GSTZ1	NTRA	GSTU5	GSTF9	GSTF10	SFGH	CM1	FSD1	PRX52	At5g06290	AT5G06730	AT5G20500	AT5G24760	GRXC2	AT5G64120
GO Process GO:0016052 Carbohydrate catabolic process 19 256 0.66 4.94e-06 3702.AT1G12000.1	3702.AT1G13440.1	3702.AT1G35580.2	3702.AT1G43670.1	3702.AT1G76550.1	3702.AT1G80460.1	3702.AT2G21170.1	3702.AT2G21330.1	3702.AT2G29560.1	3702.AT2G36530.1	3702.AT3G12500.1	3702.AT3G46970.1	3702.AT3G55440.1	3702.AT4G04040.1	3702.AT4G32840.1	3702.AT5G10560.1	3702.AT5G42740.1	3702.AT5G56630.1	3702.AT5G61410.1 AT1G12000	GAPC2	CINV1	FBP	AT1G76550	NHO1	TIM	FBA1	ENOC	LOS2	HCHIB	PHS2	TPI	MEE51	PFK6	AT5G10560	AT5G42740	PFK7	RPE
GO Process GO:0046034 ATP metabolic process 14 136 0.8 6.17e-06 3702.AT1G12000.1	3702.AT1G13440.1	3702.AT1G76550.1	3702.AT2G21170.1	3702.AT2G21330.1	3702.AT2G29560.1	3702.AT2G36530.1	3702.AT3G01390.2	3702.AT3G55440.1	3702.AT4G04040.1	3702.AT4G32840.1	3702.AT4G38510.5	3702.AT5G42740.1	3702.AT5G56630.1 AT1G12000	GAPC2	AT1G76550	TIM	FBA1	ENOC	LOS2	VMA10	TPI	MEE51	PFK6	VAB2	AT5G42740	PFK7
GO Process GO:0046185 Aldehyde catabolic process 7 20 1.33 7.38e-06 3702.AT1G11840.6	3702.AT1G67280.1	3702.AT2G41530.1	3702.AT3G02720.1	3702.AT3G10850.1	3702.AT3G14990.1	3702.AT5G24760.1 GLX1	AT1G67280	SFGH	DJ1D	GLY2	DJ1A	AT5G24760
GO Process GO:0006790 Sulfur compound metabolic process 22 350 0.59 7.44e-06 3702.AT1G02880.3	3702.AT1G32500.1	3702.AT1G50110.1	3702.AT1G78380.1	3702.AT1G80360.1	3702.AT2G02390.3	3702.AT2G26060.1	3702.AT2G29450.1	3702.AT2G30860.1	3702.AT2G30870.1	3702.AT3G03780.1	3702.AT3G16950.2	3702.AT3G16990.1	3702.AT4G13430.1	3702.AT4G19710.2	3702.AT4G34200.1	3702.AT5G04590.1	3702.AT5G27450.2	3702.AT5G37830.1	3702.AT5G56760.1	3702.AT5G63980.1	3702.AT5G63990.1 TPK1	ABCI7	AT1G50110	GSTU19	AT1G80360	GSTZ1	emb1345	GSTU5	GSTF9	GSTF10	MS2	LPD1	AT3G16990	IIL1	AKHSDH2	EDA9	SIR	MK	OXP1	SERAT1;1	SAL1	AT5G63990
GO Process GO:0044265 Cellular macromolecule catabolic process 29 578 0.49 8.25e-06 3702.AT1G13060.2	3702.AT1G15000.1	3702.AT1G21720.1	3702.AT1G31340.1	3702.AT1G56450.1	3702.AT1G76860.1	3702.AT1G77440.1	3702.AT1G79210.2	3702.AT2G02990.1	3702.AT2G05840.1	3702.AT2G27020.1	3702.AT2G28100.1	3702.AT3G02540.1	3702.AT3G12500.1	3702.AT3G22110.1	3702.AT3G26340.1	3702.AT3G27430.2	3702.AT3G51260.1	3702.AT3G53970.1	3702.AT3G60820.1	3702.AT3G62250.1	3702.AT4G05420.1	3702.AT4G14800.2	3702.AT4G27490.1	3702.AT4G31300.2	3702.AT5G10560.1	3702.AT5G35590.1	3702.AT5G38470.1	3702.AT5G42790.1 PBE1	scpl50	PBC1	RUB1	PBG1	LSM3B	PBC2	AT1G79210	RNS1	At2g05840	PAG1	FUC1	RAD23C	HCHIB	PAC1	AT3G26340	PBB1	PAD1	AT3G53970	PBF1	UBQ5	DDB1A
GO Process GO:0043170 Macromolecule metabolic process 120 4720 0.2 9.21e-06 3702.AT1G02170.1	3702.AT1G03330.1	3702.AT1G05350.1	3702.AT1G08360.1	3702.AT1G11910.1	3702.AT1G13060.2	3702.AT1G14320.1	3702.AT1G15000.1	3702.AT1G15930.1	3702.AT1G18080.1	3702.AT1G18540.1	3702.AT1G19570.1	3702.AT1G21720.1	3702.AT1G26570.1	3702.AT1G28350.1	3702.AT1G29880.1	3702.AT1G31340.1	3702.AT1G33120.1	3702.AT1G36310.1	3702.AT1G43670.1	3702.AT1G52160.1	3702.AT1G56450.1	3702.AT1G74050.1	3702.AT1G76860.1	3702.AT1G77440.1	3702.AT1G77710.1	3702.AT1G78680.1	3702.AT1G79210.2	3702.AT1G79690.1	3702.AT2G01250.1	3702.AT2G02990.1	3702.AT2G03800.1	3702.AT2G05840.1	3702.AT2G09990.1	3702.AT2G14260.1	3702.AT2G18230.1	3702.AT2G19730.3	3702.AT2G22475.1	3702.AT2G22970.3	3702.AT2G27020.1	3702.AT2G27040.2	3702.AT2G27530.1	3702.AT2G27720.2	3702.AT2G28100.1	3702.AT2G33840.1	3702.AT2G34260.1	3702.AT2G34480.1	3702.AT2G39390.1	3702.AT2G40590.1	3702.AT2G43810.1
GO Process GO:0006094 Gluconeogenesis 7 21 1.31 9.36e-06 3702.AT1G13440.1	3702.AT1G43670.1	3702.AT2G21170.1	3702.AT2G21330.1	3702.AT3G55440.1	3702.AT3G55800.1	3702.AT5G42740.1 GAPC2	FBP	TIM	FBA1	TPI	SBPASE	AT5G42740
GO Process GO:0019318 Hexose metabolic process 13 123 0.81 1.24e-05 3702.AT1G12900.1	3702.AT1G13440.1	3702.AT1G23190.1	3702.AT1G42970.1	3702.AT1G43670.1	3702.AT1G70730.3	3702.AT2G21170.1	3702.AT2G21330.1	3702.AT2G28100.1	3702.AT3G26720.1	3702.AT3G55440.1	3702.AT3G55800.1	3702.AT5G42740.1 GAPA-2	GAPC2	PGM3	GAPB	FBP	PGM2	TIM	FBA1	FUC1	AT3G26720	TPI	SBPASE	AT5G42740
GO Process GO:0019941 Modification-dependent protein catabolic process 22 362 0.57 1.24e-05 3702.AT1G13060.2	3702.AT1G21720.1	3702.AT1G31340.1	3702.AT1G56450.1	3702.AT1G77440.1	3702.AT1G79210.2	3702.AT2G05840.1	3702.AT2G27020.1	3702.AT3G02540.1	3702.AT3G22110.1	3702.AT3G26340.1	3702.AT3G27430.2	3702.AT3G51260.1	3702.AT3G53970.1	3702.AT3G60820.1	3702.AT3G62250.1	3702.AT4G05420.1	3702.AT4G14800.2	3702.AT4G31300.2	3702.AT5G35590.1	3702.AT5G38470.1	3702.AT5G42790.1 PBE1	PBC1	RUB1	PBG1	PBC2	AT1G79210	At2g05840	PAG1	RAD23C	PAC1	AT3G26340	PBB1	PAD1	AT3G53970	PBF1	UBQ5	DDB1A	PBD2	PBA1	At5g35590	RAD23D	PAF1
GO Process GO:0034645 Cellular macromolecule biosynthetic process 41 1040 0.39 1.30e-05 3702.AT1G08360.1	3702.AT1G14320.1	3702.AT1G15930.1	3702.AT1G18080.1	3702.AT1G18540.1	3702.AT1G28350.1	3702.AT1G29880.1	3702.AT1G33120.1	3702.AT1G74050.1	3702.AT2G09990.1	3702.AT2G19730.3	3702.AT2G27530.1	3702.AT2G27720.2	3702.AT2G33840.1	3702.AT2G34480.1	3702.AT2G39390.1	3702.AT2G40590.1	3702.AT3G02560.2	3702.AT3G04400.1	3702.AT3G07110.2	3702.AT3G09500.1	3702.AT3G10610.1	3702.AT3G16080.1	3702.AT3G27850.1	3702.AT3G52580.1	3702.AT3G53430.1	3702.AT3G53870.1	3702.AT3G55620.1	3702.AT3G55800.1	3702.AT3G60245.1	3702.AT3G61110.1	3702.AT3G62250.1	3702.AT4G00810.1	3702.AT4G15000.1	3702.AT4G18100.1	3702.AT4G29410.1	3702.AT4G36130.1	3702.AT5G03850.1	3702.AT5G27470.1	3702.AT5G27850.1	3702.AT5G67510.1 AT1G08360	SAC52	AT1G15930	ATARCA	AT1G18540	AT1G28350	AT1G29880	RPL9B	AT1G74050	AT2G09990
GO Process GO:0006002 Fructose 6-phosphate metabolic process 6 13 1.45 1.47e-05 3702.AT1G12000.1	3702.AT1G43670.1	3702.AT3G55800.1	3702.AT4G04040.1	3702.AT4G32840.1	3702.AT5G56630.1 AT1G12000	FBP	SBPASE	MEE51	PFK6	PFK7
GO Process GO:0043648 Dicarboxylic acid metabolic process 11 90 0.88 2.61e-05 3702.AT1G04410.1	3702.AT1G50480.1	3702.AT1G65960.2	3702.AT1G69370.1	3702.AT3G06350.1	3702.AT3G29200.1	3702.AT3G60880.2	3702.AT4G19710.2	3702.AT5G10870.1	3702.AT5G19550.1	3702.AT5G66120.2 c-NAD-MDH1	THFS	GAD2	CM3	MEE32	CM1	DHDPS1	AKHSDH2	CM2	ASP2	AT5G66120
GO Process GO:0072524 Pyridine-containing compound metabolic process 7 26 1.22 2.92e-05 3702.AT1G55090.1	3702.AT2G22570.1	3702.AT3G16050.1	3702.AT4G36940.1	3702.AT5G01410.1	3702.AT5G19150.1	3702.AT5G20070.1 AT1G55090	NIC1	PDX1.2	NAPRT1	RSR4	AT5G19150	NUDX19
GO Process GO:0030163 Protein catabolic process 25 484 0.5 3.18e-05 3702.AT1G11910.1	3702.AT1G13060.2	3702.AT1G15000.1	3702.AT1G21720.1	3702.AT1G31340.1	3702.AT1G56450.1	3702.AT1G77440.1	3702.AT1G79210.2	3702.AT2G05840.1	3702.AT2G27020.1	3702.AT2G28100.1	3702.AT3G02540.1	3702.AT3G22110.1	3702.AT3G26340.1	3702.AT3G27430.2	3702.AT3G51260.1	3702.AT3G53970.1	3702.AT3G60820.1	3702.AT3G62250.1	3702.AT4G05420.1	3702.AT4G14800.2	3702.AT4G31300.2	3702.AT5G35590.1	3702.AT5G38470.1	3702.AT5G42790.1 APA1	PBE1	scpl50	PBC1	RUB1	PBG1	PBC2	AT1G79210	At2g05840	PAG1	FUC1	RAD23C	PAC1	AT3G26340	PBB1	PAD1	AT3G53970	PBF1	UBQ5	DDB1A	PBD2	PBA1	At5g35590	RAD23D	PAF1
GO Process GO:0006066 Alcohol metabolic process 13 136 0.77 3.26e-05 3702.AT1G31190.1	3702.AT1G80460.1	3702.AT2G21170.1	3702.AT2G22240.1	3702.AT2G27150.2	3702.AT3G14990.1	3702.AT3G43600.1	3702.AT3G55440.1	3702.AT4G35830.1	3702.AT4G39800.1	3702.AT5G16760.1	3702.AT5G63980.1	3702.AT5G63990.1 IMPL1	NHO1	TIM	MIPS2	AAO3	DJ1A	AAO2	TPI	At4g35830	MIPS1	ITPK1	SAL1	AT5G63990
GO Process GO:0006576 Cellular biogenic amine metabolic process 9 56 1.0 3.40e-05 3702.AT1G23820.1	3702.AT1G69370.1	3702.AT1G70310.1	3702.AT1G80360.1	3702.AT3G54640.1	3702.AT4G02610.1	3702.AT4G27070.1	3702.AT4G34180.1	3702.AT5G53120.6 SPDS1	CM3	SPDS2	AT1G80360	TSA2	AT4G02610	TSB2	AT4G34180	SPDS3
GO Process GO:0006796 Phosphate-containing compound metabolic process 55 1682 0.31 3.67e-05 3702.AT1G01050.1	3702.AT1G02880.3	3702.AT1G12000.1	3702.AT1G13440.1	3702.AT1G29880.1	3702.AT1G31190.1	3702.AT1G32060.1	3702.AT1G43670.1	3702.AT1G52570.1	3702.AT1G55090.1	3702.AT1G76550.1	3702.AT1G80460.1	3702.AT2G18230.1	3702.AT2G21170.1	3702.AT2G21330.1	3702.AT2G22240.1	3702.AT2G22570.1	3702.AT2G27190.1	3702.AT2G29560.1	3702.AT2G35840.3	3702.AT2G36530.1	3702.AT2G42910.1	3702.AT3G01390.2	3702.AT3G03520.1	3702.AT3G04790.1	3702.AT3G09820.1	3702.AT3G14990.1	3702.AT3G16050.1	3702.AT3G16950.2	3702.AT3G16990.1	3702.AT3G18030.1	3702.AT3G53620.1	3702.AT3G55440.1	3702.AT3G55800.1	3702.AT3G60750.1	3702.AT4G04040.1	3702.AT4G13720.1	3702.AT4G19710.2	3702.AT4G32840.1	3702.AT4G36940.1	3702.AT4G39800.1	3702.AT5G01410.1	3702.AT5G16760.1	3702.AT5G19150.1	3702.AT5G20070.1	3702.AT5G27450.2	3702.AT5G42740.1	3702.AT5G49650.1	3702.AT5G56630.1	3702.AT5G59160.2
GO Process GO:1901616 Organic hydroxy compound catabolic process 8 42 1.07 4.36e-05 3702.AT1G12050.1	3702.AT1G31190.1	3702.AT1G80460.1	3702.AT2G02390.3	3702.AT2G21170.1	3702.AT3G55440.1	3702.AT5G63980.1	3702.AT5G63990.1 AT1G12050	IMPL1	NHO1	GSTZ1	TIM	TPI	SAL1	AT5G63990
GO Process GO:0044267 Cellular protein metabolic process 79 2809 0.24 4.61e-05 3702.AT1G05350.1	3702.AT1G08360.1	3702.AT1G13060.2	3702.AT1G14320.1	3702.AT1G15000.1	3702.AT1G15930.1	3702.AT1G18080.1	3702.AT1G18540.1	3702.AT1G19570.1	3702.AT1G21720.1	3702.AT1G28350.1	3702.AT1G29880.1	3702.AT1G31340.1	3702.AT1G33120.1	3702.AT1G56450.1	3702.AT1G74050.1	3702.AT1G77440.1	3702.AT1G77710.1	3702.AT1G79210.2	3702.AT2G05840.1	3702.AT2G09990.1	3702.AT2G19730.3	3702.AT2G22475.1	3702.AT2G27020.1	3702.AT2G27040.2	3702.AT2G27530.1	3702.AT2G27720.2	3702.AT2G33840.1	3702.AT2G34480.1	3702.AT2G39390.1	3702.AT2G40590.1	3702.AT3G02540.1	3702.AT3G02560.2	3702.AT3G04400.1	3702.AT3G06540.1	3702.AT3G07110.2	3702.AT3G09500.1	3702.AT3G10610.1	3702.AT3G14990.1	3702.AT3G16080.1	3702.AT3G22110.1	3702.AT3G26340.1	3702.AT3G26720.1	3702.AT3G27430.2	3702.AT3G27850.1	3702.AT3G51260.1	3702.AT3G52580.1	3702.AT3G53430.1	3702.AT3G53870.1	3702.AT3G53970.1
GO Process GO:0009308 Amine metabolic process 11 97 0.85 4.72e-05 3702.AT1G23820.1	3702.AT1G62810.1	3702.AT1G69370.1	3702.AT1G70310.1	3702.AT1G80360.1	3702.AT3G54640.1	3702.AT4G02610.1	3702.AT4G27070.1	3702.AT4G34180.1	3702.AT5G11950.1	3702.AT5G53120.6 SPDS1	CuAO1	CM3	SPDS2	AT1G80360	TSA2	AT4G02610	TSB2	AT4G34180	LOG8	SPDS3
GO Process GO:0009057 Macromolecule catabolic process 32 761 0.41 6.52e-05 3702.AT1G11910.1	3702.AT1G13060.2	3702.AT1G15000.1	3702.AT1G21720.1	3702.AT1G31340.1	3702.AT1G43670.1	3702.AT1G56450.1	3702.AT1G76860.1	3702.AT1G77440.1	3702.AT1G79210.2	3702.AT2G02990.1	3702.AT2G05840.1	3702.AT2G27020.1	3702.AT2G28100.1	3702.AT3G02540.1	3702.AT3G12500.1	3702.AT3G22110.1	3702.AT3G26340.1	3702.AT3G27430.2	3702.AT3G46970.1	3702.AT3G51260.1	3702.AT3G53970.1	3702.AT3G60820.1	3702.AT3G62250.1	3702.AT4G05420.1	3702.AT4G14800.2	3702.AT4G27490.1	3702.AT4G31300.2	3702.AT5G10560.1	3702.AT5G35590.1	3702.AT5G38470.1	3702.AT5G42790.1 APA1	PBE1	scpl50	PBC1	RUB1	FBP	PBG1	LSM3B	PBC2	AT1G79210	RNS1	At2g05840	PAG1	FUC1	RAD23C	HCHIB	PAC1	AT3G26340	PBB1
GO Process GO:0051603 Proteolysis involved in cellular protein catabolic process 23 439 0.51 6.52e-05 3702.AT1G13060.2	3702.AT1G15000.1	3702.AT1G21720.1	3702.AT1G31340.1	3702.AT1G56450.1	3702.AT1G77440.1	3702.AT1G79210.2	3702.AT2G05840.1	3702.AT2G27020.1	3702.AT3G02540.1	3702.AT3G22110.1	3702.AT3G26340.1	3702.AT3G27430.2	3702.AT3G51260.1	3702.AT3G53970.1	3702.AT3G60820.1	3702.AT3G62250.1	3702.AT4G05420.1	3702.AT4G14800.2	3702.AT4G31300.2	3702.AT5G35590.1	3702.AT5G38470.1	3702.AT5G42790.1 PBE1	scpl50	PBC1	RUB1	PBG1	PBC2	AT1G79210	At2g05840	PAG1	RAD23C	PAC1	AT3G26340	PBB1	PAD1	AT3G53970	PBF1	UBQ5	DDB1A	PBD2	PBA1	At5g35590	RAD23D	PAF1
GO Process GO:0061727 Methylglyoxal catabolic process to lactate 5 9 1.54 6.52e-05 3702.AT1G11840.6	3702.AT1G67280.1	3702.AT3G02720.1	3702.AT3G10850.1	3702.AT3G14990.1 GLX1	AT1G67280	DJ1D	GLY2	DJ1A
GO Process GO:0006575 Cellular modified amino acid metabolic process 11 105 0.81 9.23e-05 3702.AT1G50480.1	3702.AT1G74920.1	3702.AT1G78380.1	3702.AT1G78680.1	3702.AT2G02390.3	3702.AT2G29450.1	3702.AT2G30860.1	3702.AT2G30870.1	3702.AT3G12290.1	3702.AT4G39800.1	3702.AT5G37830.1 THFS	ALDH10A8	GSTU19	GGH2	GSTZ1	GSTU5	GSTF9	GSTF10	AT3G12290	MIPS1	OXP1
GO Process GO:0006511 Ubiquitin-dependent protein catabolic process 20 352 0.55 9.29e-05 3702.AT1G13060.2	3702.AT1G21720.1	3702.AT1G56450.1	3702.AT1G77440.1	3702.AT1G79210.2	3702.AT2G05840.1	3702.AT2G27020.1	3702.AT3G02540.1	3702.AT3G22110.1	3702.AT3G26340.1	3702.AT3G27430.2	3702.AT3G51260.1	3702.AT3G53970.1	3702.AT3G60820.1	3702.AT4G05420.1	3702.AT4G14800.2	3702.AT4G31300.2	3702.AT5G35590.1	3702.AT5G38470.1	3702.AT5G42790.1 PBE1	PBC1	PBG1	PBC2	AT1G79210	At2g05840	PAG1	RAD23C	PAC1	AT3G26340	PBB1	PAD1	AT3G53970	PBF1	DDB1A	PBD2	PBA1	At5g35590	RAD23D	PAF1
GO Process GO:0045454 Cell redox homeostasis 9 66 0.93 0.00010 3702.AT2G15570.2	3702.AT3G15360.1	3702.AT3G16950.2	3702.AT4G16155.1	3702.AT4G36910.1	3702.AT5G06290.1	3702.AT5G20500.1	3702.AT5G40370.2	3702.AT5G42980.1 ATHM3	TRX-M4	LPD1	AT4G16155	LEJ2	At5g06290	AT5G20500	GRXC2	TRX3
GO Process GO:0009225 Nucleotide-sugar metabolic process 8 49 1.0 0.00011 3702.AT1G17890.1	3702.AT1G26570.1	3702.AT3G29360.1	3702.AT3G46440.2	3702.AT3G51160.1	3702.AT5G15490.1	3702.AT5G16510.2	3702.AT5G59290.2 At1g17890	UGD1	UGD2	UXS5	MUR1	UGD3	RGP5	UXS3
GO Process GO:0016051 Carbohydrate biosynthetic process 18 295 0.58 0.00011 3702.AT1G12900.1	3702.AT1G13440.1	3702.AT1G31190.1	3702.AT1G32060.1	3702.AT1G42970.1	3702.AT1G43670.1	3702.AT1G67090.1	3702.AT2G21170.1	3702.AT2G21330.1	3702.AT2G22240.1	3702.AT2G35840.3	3702.AT3G04790.1	3702.AT3G55440.1	3702.AT3G55800.1	3702.AT3G60750.1	3702.AT4G39800.1	3702.AT5G42740.1	3702.AT5G61410.1 GAPA-2	GAPC2	IMPL1	PRK	GAPB	FBP	RBCS1A	TIM	FBA1	MIPS2	AT2G35840	EMB3119	TPI	SBPASE	AT3G60750	MIPS1	AT5G42740	RPE
GO Process GO:1901606 Alpha-amino acid catabolic process 10 86 0.86 0.00011 3702.AT1G06570.1	3702.AT1G12050.1	3702.AT1G65960.2	3702.AT1G71170.1	3702.AT1G80360.1	3702.AT2G02390.3	3702.AT2G03800.1	3702.AT3G04520.1	3702.AT4G29120.1	3702.AT4G34180.1 PDS1	AT1G12050	GAD2	AT1G71170	AT1G80360	GSTZ1	GEK1	THA2	AT4G29120	AT4G34180
GO Process GO:0046417 Chorismate metabolic process 5 12 1.41 0.00017 3702.AT1G69370.1	3702.AT3G06350.1	3702.AT3G29200.1	3702.AT5G10870.1	3702.AT5G66120.2 CM3	MEE32	CM1	CM2	AT5G66120
GO Process GO:0009409 Response to cold 20 370 0.52 0.00018 3702.AT1G20450.1	3702.AT1G32060.1	3702.AT1G35720.1	3702.AT1G42970.1	3702.AT1G55490.2	3702.AT1G62820.1	3702.AT1G67090.1	3702.AT1G67280.1	3702.AT2G27020.1	3702.AT2G36530.1	3702.AT3G12490.2	3702.AT3G51780.1	3702.AT5G04590.1	3702.AT5G06290.1	3702.AT5G20830.1	3702.AT5G38470.1	3702.AT5G38480.1	3702.AT5G52310.1	3702.AT5G59820.1	3702.AT5G61410.1 ERD10	PRK	ANNAT1	GAPB	CPN60B	AT1G62820	RBCS1A	AT1G67280	PAG1	LOS2	CYSB	BAG4	SIR	At5g06290	SUS1	RAD23D	RCI1A	LTI78	RHL41	RPE
GO Process GO:0019751 Polyol metabolic process 9 74 0.88 0.00023 3702.AT1G31190.1	3702.AT1G80460.1	3702.AT2G21170.1	3702.AT2G22240.1	3702.AT3G55440.1	3702.AT4G39800.1	3702.AT5G16760.1	3702.AT5G63980.1	3702.AT5G63990.1 IMPL1	NHO1	TIM	MIPS2	TPI	MIPS1	ITPK1	SAL1	AT5G63990
GO Process GO:0009226 Nucleotide-sugar biosynthetic process 7 39 1.04 0.00025 3702.AT1G17890.1	3702.AT1G26570.1	3702.AT3G29360.1	3702.AT3G46440.2	3702.AT3G51160.1	3702.AT5G15490.1	3702.AT5G59290.2 At1g17890	UGD1	UGD2	UXS5	MUR1	UGD3	UXS3
GO Process GO:0042401 Cellular biogenic amine biosynthetic process 7 39 1.04 0.00025 3702.AT1G23820.1	3702.AT1G69370.1	3702.AT1G70310.1	3702.AT3G54640.1	3702.AT4G02610.1	3702.AT4G27070.1	3702.AT5G53120.6 SPDS1	CM3	SPDS2	TSA2	AT4G02610	TSB2	SPDS3
GO Process GO:0046174 Polyol catabolic process 6 25 1.17 0.00026 3702.AT1G31190.1	3702.AT1G80460.1	3702.AT2G21170.1	3702.AT3G55440.1	3702.AT5G63980.1	3702.AT5G63990.1 IMPL1	NHO1	TIM	TPI	SAL1	AT5G63990
GO Process GO:0046835 Carbohydrate phosphorylation 7 40 1.03 0.00028 3702.AT1G12000.1	3702.AT1G76550.1	3702.AT4G04040.1	3702.AT4G32840.1	3702.AT5G16760.1	3702.AT5G49650.1	3702.AT5G56630.1 AT1G12000	AT1G76550	MEE51	PFK6	ITPK1	XK-2	PFK7
GO Process GO:0006568 Tryptophan metabolic process 6 26 1.15 0.00031 3702.AT1G69370.1	3702.AT1G80360.1	3702.AT3G54640.1	3702.AT4G02610.1	3702.AT4G27070.1	3702.AT4G34180.1 CM3	AT1G80360	TSA2	AT4G02610	TSB2	AT4G34180
GO Process GO:0044270 Cellular nitrogen compound catabolic process 13 176 0.66 0.00036 3702.AT1G05620.1	3702.AT1G70410.2	3702.AT1G76860.1	3702.AT1G80360.1	3702.AT2G02990.1	3702.AT3G23490.1	3702.AT4G13720.1	3702.AT4G27490.1	3702.AT4G34180.1	3702.AT4G34890.1	3702.AT4G37000.1	3702.AT5G20070.1	3702.AT5G64370.1 URH2	BCA4	LSM3B	AT1G80360	RNS1	CYN	AT4G13720	RRP41L	AT4G34180	XDH1	ACD2	NUDX19	BETA-UP
GO Process GO:0000463 Maturation of lsu-rrna from tricistronic rrna transcript (ssu-rrna	5.8s rrna	lsu-rrna) 5 15 1.31 0.00039 3702.AT2G01250.1	3702.AT2G39390.1	3702.AT2G44120.2	3702.AT3G09500.1	3702.AT3G13580.3 AT2G01250	AT2G39390	AT2G44120	AT3G09500	AT3G13580
GO Process GO:1901361 Organic cyclic compound catabolic process 14 209 0.62 0.00046 3702.AT1G05620.1	3702.AT1G06570.1	3702.AT1G12050.1	3702.AT1G76860.1	3702.AT1G80360.1	3702.AT2G02390.3	3702.AT2G02990.1	3702.AT4G13720.1	3702.AT4G27490.1	3702.AT4G34180.1	3702.AT4G34890.1	3702.AT4G37000.1	3702.AT5G20070.1	3702.AT5G64370.1 URH2	PDS1	AT1G12050	LSM3B	AT1G80360	GSTZ1	RNS1	AT4G13720	RRP41L	AT4G34180	XDH1	ACD2	NUDX19	BETA-UP
GO Process GO:0019362 Pyridine nucleotide metabolic process 5 16 1.29 0.00049 3702.AT1G55090.1	3702.AT2G22570.1	3702.AT4G36940.1	3702.AT5G19150.1	3702.AT5G20070.1 AT1G55090	NIC1	NAPRT1	AT5G19150	NUDX19
GO Process GO:0005985 Sucrose metabolic process 7 45 0.98 0.00053 3702.AT1G01050.1	3702.AT1G35580.2	3702.AT1G43670.1	3702.AT2G35840.3	3702.AT3G43190.1	3702.AT3G55800.1	3702.AT5G20830.1 PPa1	CINV1	FBP	AT2G35840	SUS4	SBPASE	SUS1
GO Process GO:0043647 Inositol phosphate metabolic process 6 30 1.09 0.00060 3702.AT1G31190.1	3702.AT2G22240.1	3702.AT4G39800.1	3702.AT5G16760.1	3702.AT5G63980.1	3702.AT5G63990.1 IMPL1	MIPS2	MIPS1	ITPK1	SAL1	AT5G63990
GO Process GO:0044085 Cellular component biogenesis 36 1028 0.33 0.00061 3702.AT1G01050.1	3702.AT1G08360.1	3702.AT1G14320.1	3702.AT1G18080.1	3702.AT1G18540.1	3702.AT1G32500.1	3702.AT1G53310.3	3702.AT1G67090.1	3702.AT1G74050.1	3702.AT1G76860.1	3702.AT2G01250.1	3702.AT2G09990.1	3702.AT2G20760.1	3702.AT2G26060.1	3702.AT2G27040.2	3702.AT2G27530.1	3702.AT2G30410.2	3702.AT2G34260.1	3702.AT2G39390.1	3702.AT2G43810.1	3702.AT2G44120.2	3702.AT3G02560.2	3702.AT3G09500.1	3702.AT3G13580.3	3702.AT3G52580.1	3702.AT3G53430.1	3702.AT3G55620.1	3702.AT3G61110.1	3702.AT3G62870.1	3702.AT4G14570.1	3702.AT4G27490.1	3702.AT5G03850.1	3702.AT5G16510.2	3702.AT5G42980.1	3702.AT5G49510.1	3702.AT5G67510.1 PPa1	AT1G08360	SAC52	ATARCA	AT1G18540	ABCI7	PPC1	RBCS1A	AT1G74050	LSM3B	AT2G01250	AT2G09990	AT2G20760	emb1345	AGO4
GO Process GO:0019439 Aromatic compound catabolic process 13 198 0.61 0.0011 3702.AT1G05620.1	3702.AT1G06570.1	3702.AT1G12050.1	3702.AT1G76860.1	3702.AT1G80360.1	3702.AT2G02390.3	3702.AT2G02990.1	3702.AT4G13720.1	3702.AT4G27490.1	3702.AT4G34180.1	3702.AT4G34890.1	3702.AT4G37000.1	3702.AT5G20070.1 URH2	PDS1	AT1G12050	LSM3B	AT1G80360	GSTZ1	RNS1	AT4G13720	RRP41L	AT4G34180	XDH1	ACD2	NUDX19
GO Process GO:0009074 Aromatic amino acid family catabolic process 5 20 1.19 0.0012 3702.AT1G06570.1	3702.AT1G12050.1	3702.AT1G80360.1	3702.AT2G02390.3	3702.AT4G34180.1 PDS1	AT1G12050	AT1G80360	GSTZ1	AT4G34180
GO Process GO:0044260 Cellular macromolecule metabolic process 90 3665 0.18 0.0012 3702.AT1G05350.1	3702.AT1G08360.1	3702.AT1G13060.2	3702.AT1G14320.1	3702.AT1G15000.1	3702.AT1G15930.1	3702.AT1G18080.1	3702.AT1G18540.1	3702.AT1G19570.1	3702.AT1G21720.1	3702.AT1G28350.1	3702.AT1G29880.1	3702.AT1G31340.1	3702.AT1G33120.1	3702.AT1G36310.1	3702.AT1G43670.1	3702.AT1G56450.1	3702.AT1G74050.1	3702.AT1G76860.1	3702.AT1G77440.1	3702.AT1G77710.1	3702.AT1G79210.2	3702.AT2G02990.1	3702.AT2G05840.1	3702.AT2G09990.1	3702.AT2G19730.3	3702.AT2G22475.1	3702.AT2G27020.1	3702.AT2G27040.2	3702.AT2G27530.1	3702.AT2G27720.2	3702.AT2G28100.1	3702.AT2G33840.1	3702.AT2G34480.1	3702.AT2G39390.1	3702.AT2G40590.1	3702.AT3G02540.1	3702.AT3G02560.2	3702.AT3G04400.1	3702.AT3G06540.1	3702.AT3G07110.2	3702.AT3G09500.1	3702.AT3G10610.1	3702.AT3G12500.1	3702.AT3G14990.1	3702.AT3G16080.1	3702.AT3G22110.1	3702.AT3G26340.1	3702.AT3G26720.1	3702.AT3G27430.2
GO Process GO:0046434 Organophosphate catabolic process 7 52 0.92 0.0012 3702.AT1G31190.1	3702.AT1G52570.1	3702.AT3G03520.1	3702.AT4G13720.1	3702.AT5G20070.1	3702.AT5G63980.1	3702.AT5G63990.1 IMPL1	PLDALPHA2	NPC3	AT4G13720	NUDX19	SAL1	AT5G63990
GO Process GO:1901137 Carbohydrate derivative biosynthetic process 18 363 0.49 0.0013 3702.AT1G17890.1	3702.AT1G26570.1	3702.AT1G50110.1	3702.AT1G80460.1	3702.AT2G21170.1	3702.AT2G42910.1	3702.AT3G01390.2	3702.AT3G09820.1	3702.AT3G16950.2	3702.AT3G18030.1	3702.AT3G29360.1	3702.AT3G46440.2	3702.AT3G51160.1	3702.AT3G55440.1	3702.AT4G13430.1	3702.AT5G15490.1	3702.AT5G59290.2	3702.AT5G63310.1 At1g17890	UGD1	AT1G50110	NHO1	TIM	AT2G42910	VMA10	At3g09820	LPD1	HAL3A	UGD2	UXS5	MUR1	TPI	IIL1	UGD3	UXS3	NDPK2
GO Process GO:0009266 Response to temperature stimulus 23 549 0.41 0.0015 3702.AT1G20450.1	3702.AT1G32060.1	3702.AT1G35720.1	3702.AT1G42970.1	3702.AT1G55490.2	3702.AT1G62820.1	3702.AT1G67090.1	3702.AT1G67280.1	3702.AT2G27020.1	3702.AT2G36530.1	3702.AT3G12490.2	3702.AT3G51780.1	3702.AT4G26840.1	3702.AT5G04590.1	3702.AT5G06290.1	3702.AT5G14800.1	3702.AT5G20830.1	3702.AT5G38470.1	3702.AT5G38480.1	3702.AT5G42980.1	3702.AT5G52310.1	3702.AT5G59820.1	3702.AT5G61410.1 ERD10	PRK	ANNAT1	GAPB	CPN60B	AT1G62820	RBCS1A	AT1G67280	PAG1	LOS2	CYSB	BAG4	SUMO1	SIR	At5g06290	P5CR	SUS1	RAD23D	RCI1A	TRX3	LTI78	RHL41	RPE
GO Process GO:0034654 Nucleobase-containing compound biosynthetic process 20 439 0.45 0.0015 3702.AT1G17890.1	3702.AT1G26570.1	3702.AT1G29880.1	3702.AT1G55090.1	3702.AT2G22570.1	3702.AT2G42910.1	3702.AT3G01390.2	3702.AT3G09820.1	3702.AT3G16950.2	3702.AT3G18030.1	3702.AT3G29360.1	3702.AT3G46440.2	3702.AT3G51160.1	3702.AT4G13720.1	3702.AT4G36940.1	3702.AT5G15490.1	3702.AT5G20070.1	3702.AT5G27470.1	3702.AT5G59290.2	3702.AT5G63310.1 At1g17890	UGD1	AT1G29880	AT1G55090	NIC1	AT2G42910	VMA10	At3g09820	LPD1	HAL3A	UGD2	UXS5	MUR1	AT4G13720	NAPRT1	UGD3	NUDX19	AT5G27470	UXS3	NDPK2
GO Process GO:0042255 Ribosome assembly 8 75 0.82 0.0015 3702.AT1G14320.1	3702.AT1G18540.1	3702.AT1G74050.1	3702.AT3G52580.1	3702.AT3G53430.1	3702.AT3G55620.1	3702.AT3G61110.1	3702.AT5G03850.1 SAC52	AT1G18540	AT1G74050	AT3G52580	AT3G53430	eIF6A	RS27A	AT3G10090
GO Process GO:0042742 Defense response to bacterium 18 370 0.48 0.0016 3702.AT1G13440.1	3702.AT1G20020.1	3702.AT1G32060.1	3702.AT1G69370.1	3702.AT1G79210.2	3702.AT1G80460.1	3702.AT2G22240.1	3702.AT2G27040.2	3702.AT2G30860.1	3702.AT3G04790.1	3702.AT3G17210.1	3702.AT3G23400.1	3702.AT3G27850.1	3702.AT3G54640.1	3702.AT3G55800.1	3702.AT5G06290.1	3702.AT5G08280.1	3702.AT5G51700.1 GAPC2	FNR2	PRK	CM3	AT1G79210	NHO1	MIPS2	AGO4	GSTF9	EMB3119	HS1	FIB4	RPL12-C	TSA2	SBPASE	At5g06290	HEMC	PBS2
GO Process GO:0072525 Pyridine-containing compound biosynthetic process 5 22 1.15 0.0017 3702.AT1G55090.1	3702.AT2G22570.1	3702.AT3G16050.1	3702.AT4G36940.1	3702.AT5G01410.1 AT1G55090	NIC1	PDX1.2	NAPRT1	RSR4
GO Process GO:0009617 Response to bacterium 20 449 0.44 0.0020 3702.AT1G13440.1	3702.AT1G20020.1	3702.AT1G32060.1	3702.AT1G69370.1	3702.AT1G79210.2	3702.AT1G80460.1	3702.AT2G22240.1	3702.AT2G27040.2	3702.AT2G30860.1	3702.AT3G04790.1	3702.AT3G17210.1	3702.AT3G23400.1	3702.AT3G27850.1	3702.AT3G54640.1	3702.AT3G55800.1	3702.AT5G06290.1	3702.AT5G08280.1	3702.AT5G51700.1	3702.AT5G52310.1	3702.AT5G60600.1 GAPC2	FNR2	PRK	CM3	AT1G79210	NHO1	MIPS2	AGO4	GSTF9	EMB3119	HS1	FIB4	RPL12-C	TSA2	SBPASE	At5g06290	HEMC	PBS2	LTI78	HDS
GO Process GO:0046184 Aldehyde biosynthetic process 4 11 1.35 0.0020 3702.AT2G21170.1	3702.AT3G16050.1	3702.AT3G55440.1	3702.AT5G01410.1 TIM	PDX1.2	TPI	RSR4
GO Process GO:0009066 Aspartate family amino acid metabolic process 7 58 0.87 0.0021 3702.AT1G50110.1	3702.AT1G80360.1	3702.AT3G03780.1	3702.AT3G04520.1	3702.AT3G60880.2	3702.AT4G19710.2	3702.AT5G19550.1 AT1G50110	AT1G80360	MS2	THA2	DHDPS1	AKHSDH2	ASP2
GO Process GO:1901700 Response to oxygen-containing compound 43 1414 0.27 0.0022 3702.AT1G12000.1	3702.AT1G18080.1	3702.AT1G19570.1	3702.AT1G20450.1	3702.AT1G35580.2	3702.AT1G35720.1	3702.AT1G42970.1	3702.AT1G43670.1	3702.AT1G44170.2	3702.AT1G51360.1	3702.AT1G52570.1	3702.AT1G54100.1	3702.AT1G62810.1	3702.AT1G70410.2	3702.AT1G74920.1	3702.AT1G76550.1	3702.AT1G78300.1	3702.AT1G78380.1	3702.AT2G17420.1	3702.AT2G22570.1	3702.AT2G30870.1	3702.AT2G36530.1	3702.AT2G40300.1	3702.AT2G41530.1	3702.AT2G45820.1	3702.AT3G09820.1	3702.AT3G12490.2	3702.AT3G23400.1	3702.AT3G46970.1	3702.AT3G52880.2	3702.AT3G55620.1	3702.AT3G59380.1	3702.AT4G04040.1	3702.AT4G25100.1	3702.AT4G34890.1	3702.AT5G01410.1	3702.AT5G20830.1	3702.AT5G24760.1	3702.AT5G52310.1	3702.AT5G59820.1	3702.AT5G60600.1	3702.AT5G63310.1	3702.AT5G63980.1 AT1G12000	ATARCA	DHAR1	ERD10	CINV1	ANNAT1	GAPB	FBP
GO Process GO:0046395 Carboxylic acid catabolic process 11 157 0.64 0.0023 3702.AT1G06570.1	3702.AT1G12050.1	3702.AT1G65960.2	3702.AT1G71170.1	3702.AT1G80360.1	3702.AT2G02390.3	3702.AT2G03800.1	3702.AT3G04520.1	3702.AT4G29120.1	3702.AT4G34180.1	3702.AT5G48230.2 PDS1	AT1G12050	GAD2	AT1G71170	AT1G80360	GSTZ1	GEK1	THA2	AT4G29120	AT4G34180	ACAT2
GO Process GO:0006570 Tyrosine metabolic process 4 12 1.31 0.0026 3702.AT1G06570.1	3702.AT1G12050.1	3702.AT1G15710.1	3702.AT1G80360.1 PDS1	AT1G12050	AT1G15710	AT1G80360
GO Process GO:0046165 Alcohol biosynthetic process 7 61 0.85 0.0027 3702.AT1G31190.1	3702.AT2G22240.1	3702.AT2G27150.2	3702.AT3G14990.1	3702.AT3G43600.1	3702.AT4G39800.1	3702.AT5G16760.1 IMPL1	MIPS2	AAO3	DJ1A	AAO2	MIPS1	ITPK1
GO Process GO:0000096 Sulfur amino acid metabolic process 7 62 0.84 0.0030 3702.AT1G50110.1	3702.AT1G80360.1	3702.AT3G03780.1	3702.AT4G19710.2	3702.AT4G34200.1	3702.AT5G04590.1	3702.AT5G56760.1 AT1G50110	AT1G80360	MS2	AKHSDH2	EDA9	SIR	SERAT1;1
GO Process GO:0046496 Nicotinamide nucleotide metabolic process 4 13 1.28 0.0033 3702.AT1G55090.1	3702.AT4G36940.1	3702.AT5G19150.1	3702.AT5G20070.1 AT1G55090	NAPRT1	AT5G19150	NUDX19
GO Process GO:1901617 Organic hydroxy compound biosynthetic process 11 165 0.61 0.0033 3702.AT1G31190.1	3702.AT2G22240.1	3702.AT2G27150.2	3702.AT3G02720.1	3702.AT3G14990.1	3702.AT3G16050.1	3702.AT3G43600.1	3702.AT4G39800.1	3702.AT5G01410.1	3702.AT5G16760.1	3702.AT5G27450.2 IMPL1	MIPS2	AAO3	DJ1D	DJ1A	PDX1.2	AAO2	MIPS1	RSR4	ITPK1	MK
GO Process GO:0006024 Glycosaminoglycan biosynthetic process 3 4 1.67 0.0034 3702.AT1G26570.1	3702.AT3G29360.1	3702.AT5G15490.1 UGD1	UGD2	UGD3
GO Process GO:0006065 UDP-glucuronate biosynthetic process 3 4 1.67 0.0034 3702.AT1G26570.1	3702.AT3G29360.1	3702.AT5G15490.1 UGD1	UGD2	UGD3
GO Process GO:0019563 Glycerol catabolic process 3 4 1.67 0.0034 3702.AT1G80460.1	3702.AT2G21170.1	3702.AT3G55440.1 NHO1	TIM	TPI
GO Process GO:0042180 Cellular ketone metabolic process 6 45 0.92 0.0038 3702.AT1G11840.6	3702.AT1G67280.1	3702.AT3G02720.1	3702.AT3G10850.1	3702.AT3G14990.1	3702.AT4G34180.1 GLX1	AT1G67280	DJ1D	GLY2	DJ1A	AT4G34180
GO Process GO:0046700 Heterocycle catabolic process 11 170 0.6 0.0041 3702.AT1G05620.1	3702.AT1G76860.1	3702.AT1G80360.1	3702.AT2G02990.1	3702.AT4G13720.1	3702.AT4G27490.1	3702.AT4G34180.1	3702.AT4G34890.1	3702.AT4G37000.1	3702.AT5G20070.1	3702.AT5G64370.1 URH2	LSM3B	AT1G80360	RNS1	AT4G13720	RRP41L	AT4G34180	XDH1	ACD2	NUDX19	BETA-UP
GO Process GO:0009605 Response to external stimulus 46 1608 0.25 0.0044 3702.AT1G13440.1	3702.AT1G14320.1	3702.AT1G19570.1	3702.AT1G20020.1	3702.AT1G32060.1	3702.AT1G51360.1	3702.AT1G53310.3	3702.AT1G55490.2	3702.AT1G69370.1	3702.AT1G78380.1	3702.AT1G79210.2	3702.AT1G80460.1	3702.AT2G02990.1	3702.AT2G22240.1	3702.AT2G27040.2	3702.AT2G27190.1	3702.AT2G30860.1	3702.AT2G45820.1	3702.AT3G03520.1	3702.AT3G04790.1	3702.AT3G12500.1	3702.AT3G17210.1	3702.AT3G18740.1	3702.AT3G23400.1	3702.AT3G25780.1	3702.AT3G27850.1	3702.AT3G52880.2	3702.AT3G54640.1	3702.AT3G55800.1	3702.AT3G60820.1	3702.AT4G05420.1	3702.AT4G35830.1	3702.AT4G37000.1	3702.AT5G06290.1	3702.AT5G08280.1	3702.AT5G38480.1	3702.AT5G42740.1	3702.AT5G42980.1	3702.AT5G51700.1	3702.AT5G52310.1	3702.AT5G60600.1	3702.AT5G61410.1	3702.AT5G63310.1	3702.AT5G63860.1	3702.AT5G64120.1	3702.AT5G64370.1 GAPC2	SAC52	DHAR1	FNR2	PRK
GO Process GO:0019321 Pentose metabolic process 4 15 1.22 0.0049 3702.AT3G46440.2	3702.AT5G49650.1	3702.AT5G59290.2	3702.AT5G61410.1 UXS5	XK-2	UXS3	RPE
GO Process GO:0006022 Aminoglycan metabolic process 4 16 1.19 0.0060 3702.AT1G26570.1	3702.AT3G12500.1	3702.AT3G29360.1	3702.AT5G15490.1 UGD1	HCHIB	UGD2	UGD3
GO Process GO:0006739 NADP metabolic process 5 31 1.0 0.0060 3702.AT3G04790.1	3702.AT3G60750.1	3702.AT5G19150.1	3702.AT5G20070.1	3702.AT5G61410.1 EMB3119	AT3G60750	AT5G19150	NUDX19	RPE
GO Process GO:0009628 Response to abiotic stimulus 49 1785 0.23 0.0067 3702.AT1G14320.1	3702.AT1G20450.1	3702.AT1G32060.1	3702.AT1G35720.1	3702.AT1G42970.1	3702.AT1G44170.2	3702.AT1G54100.1	3702.AT1G55490.2	3702.AT1G62820.1	3702.AT1G67090.1	3702.AT1G67280.1	3702.AT1G74920.1	3702.AT1G78380.1	3702.AT1G80360.1	3702.AT1G80460.1	3702.AT2G16060.1	3702.AT2G27020.1	3702.AT2G30870.1	3702.AT2G36530.1	3702.AT2G42690.1	3702.AT3G12490.2	3702.AT3G18030.1	3702.AT3G23490.1	3702.AT3G43190.1	3702.AT3G46970.1	3702.AT3G51780.1	3702.AT3G52880.2	3702.AT3G54640.1	3702.AT3G59380.1	3702.AT4G05420.1	3702.AT4G16660.1	3702.AT4G25100.1	3702.AT4G26840.1	3702.AT4G34890.1	3702.AT5G01410.1	3702.AT5G04590.1	3702.AT5G06290.1	3702.AT5G14800.1	3702.AT5G19550.1	3702.AT5G20830.1	3702.AT5G38470.1	3702.AT5G38480.1	3702.AT5G42980.1	3702.AT5G44110.1	3702.AT5G52310.1	3702.AT5G59820.1	3702.AT5G61410.1	3702.AT5G63310.1	3702.AT5G63860.1 SAC52	ERD10
GO Process GO:0006021 Inositol biosynthetic process 3 6 1.49 0.0074 3702.AT1G31190.1	3702.AT2G22240.1	3702.AT4G39800.1 IMPL1	MIPS2	MIPS1
GO Process GO:0006396 RNA processing 22 582 0.37 0.0074 3702.AT1G03330.1	3702.AT1G08360.1	3702.AT1G36310.1	3702.AT1G52160.1	3702.AT1G76860.1	3702.AT2G01250.1	3702.AT2G09990.1	3702.AT2G27040.2	3702.AT2G27530.1	3702.AT2G34260.1	3702.AT2G39390.1	3702.AT2G43810.1	3702.AT2G44120.2	3702.AT3G02560.2	3702.AT3G09500.1	3702.AT3G13580.3	3702.AT3G52580.1	3702.AT3G55620.1	3702.AT3G62870.1	3702.AT4G27490.1	3702.AT5G03850.1	3702.AT5G15810.1 LSM2	AT1G08360	AT1G36310	TRZ3	LSM3B	AT2G01250	AT2G09990	AGO4	PGY1	WDR55	AT2G39390	LSM6B	AT2G44120	AT3G02560	AT3G09500	AT3G13580	AT3G52580	eIF6A	AT3G62870	RRP41L	AT3G10090	AT5G15810
GO Process GO:0019243 Methylglyoxal catabolic process to d-lactate via s-lactoyl-glutathione 3 6 1.49 0.0074 3702.AT1G11840.6	3702.AT1G67280.1	3702.AT3G10850.1 GLX1	AT1G67280	GLY2
GO Process GO:0009165 Nucleotide biosynthetic process 10 156 0.6 0.0081 3702.AT1G29880.1	3702.AT1G55090.1	3702.AT2G22570.1	3702.AT2G42910.1	3702.AT3G01390.2	3702.AT3G09820.1	3702.AT3G16950.2	3702.AT3G18030.1	3702.AT4G36940.1	3702.AT5G63310.1 AT1G29880	AT1G55090	NIC1	AT2G42910	VMA10	At3g09820	LPD1	HAL3A	NAPRT1	NDPK2
GO Process GO:0000162 Tryptophan biosynthetic process 4 18 1.14 0.0085 3702.AT1G69370.1	3702.AT3G54640.1	3702.AT4G02610.1	3702.AT4G27070.1 CM3	TSA2	AT4G02610	TSB2
GO Process GO:0006020 Inositol metabolic process 4 18 1.14 0.0085 3702.AT1G31190.1	3702.AT2G22240.1	3702.AT4G39800.1	3702.AT5G16760.1 IMPL1	MIPS2	MIPS1	ITPK1
GO Process GO:0042274 Ribosomal small subunit biogenesis 6 54 0.84 0.0087 3702.AT2G09990.1	3702.AT2G43810.1	3702.AT3G02560.2	3702.AT3G52580.1	3702.AT3G61110.1	3702.AT5G03850.1 AT2G09990	LSM6B	AT3G02560	AT3G52580	RS27A	AT3G10090
GO Process GO:0006749 Glutathione metabolic process 6 56 0.82 0.0103 3702.AT1G78380.1	3702.AT2G02390.3	3702.AT2G29450.1	3702.AT2G30860.1	3702.AT2G30870.1	3702.AT5G37830.1 GSTU19	GSTZ1	GSTU5	GSTF9	GSTF10	OXP1
GO Process GO:0010043 Response to zinc ion 5 37 0.92 0.0118 3702.AT1G04410.1	3702.AT1G19570.1	3702.AT2G30860.1	3702.AT3G55440.1	3702.AT5G35590.1 c-NAD-MDH1	DHAR1	GSTF9	TPI	At5g35590
GO Process GO:0010264 Myo-inositol hexakisphosphate biosynthetic process 3 8 1.36 0.0134 3702.AT2G22240.1	3702.AT4G39800.1	3702.AT5G16760.1 MIPS2	MIPS1	ITPK1
GO Process GO:0044419 Interspecies interaction between organisms 37 1274 0.25 0.0134 3702.AT1G13440.1	3702.AT1G14320.1	3702.AT1G19570.1	3702.AT1G20020.1	3702.AT1G32060.1	3702.AT1G51360.1	3702.AT1G55490.2	3702.AT1G69370.1	3702.AT1G72260.1	3702.AT1G79210.2	3702.AT1G80460.1	3702.AT2G22240.1	3702.AT2G27040.2	3702.AT2G30860.1	3702.AT2G45820.1	3702.AT3G04790.1	3702.AT3G09820.1	3702.AT3G12500.1	3702.AT3G17210.1	3702.AT3G18740.1	3702.AT3G23400.1	3702.AT3G25780.1	3702.AT3G27850.1	3702.AT3G52880.2	3702.AT3G54640.1	3702.AT3G55800.1	3702.AT3G60820.1	3702.AT4G37000.1	3702.AT5G06290.1	3702.AT5G08280.1	3702.AT5G42740.1	3702.AT5G42980.1	3702.AT5G51700.1	3702.AT5G52310.1	3702.AT5G60600.1	3702.AT5G61410.1	3702.AT5G64120.1 GAPC2	SAC52	DHAR1	FNR2	PRK	DABB1	CPN60B	CM3	THI2.1	AT1G79210	NHO1	MIPS2	AGO4	GSTF9
GO Process GO:0006558 L-phenylalanine metabolic process 4 21 1.07 0.0135 3702.AT1G06570.1	3702.AT1G12050.1	3702.AT1G80360.1	3702.AT2G02390.3 PDS1	AT1G12050	AT1G80360	GSTZ1
GO Process GO:0000302 Response to reactive oxygen species 9 140 0.6 0.0145 3702.AT1G19570.1	3702.AT1G35580.2	3702.AT2G17420.1	3702.AT2G40300.1	3702.AT3G23400.1	3702.AT4G25100.1	3702.AT4G34890.1	3702.AT5G52310.1	3702.AT5G63310.1 DHAR1	CINV1	NTRA	FER4	FIB4	FSD1	XDH1	LTI78	NDPK2
GO Process GO:0002181 Cytoplasmic translation 6 61 0.78 0.0150 3702.AT1G18540.1	3702.AT1G33120.1	3702.AT1G74050.1	3702.AT4G00810.1	3702.AT4G36130.1	3702.AT5G67510.1 AT1G18540	RPL9B	AT1G74050	AT4G00810	AT4G36130	AT5G67510
GO Process GO:0009851 Auxin biosynthetic process 5 40 0.89 0.0156 3702.AT1G80360.1	3702.AT2G27150.2	3702.AT3G43600.1	3702.AT3G54640.1	3702.AT4G02610.1 AT1G80360	AAO3	AAO2	TSA2	AT4G02610
GO Process GO:0022618 Ribonucleoprotein complex assembly 8 113 0.64 0.0157 3702.AT1G14320.1	3702.AT1G18540.1	3702.AT1G74050.1	3702.AT3G52580.1	3702.AT3G53430.1	3702.AT3G55620.1	3702.AT3G61110.1	3702.AT5G03850.1 SAC52	AT1G18540	AT1G74050	AT3G52580	AT3G53430	eIF6A	RS27A	AT3G10090
GO Process GO:0042732 D-xylose metabolic process 3 9 1.31 0.0169 3702.AT3G46440.2	3702.AT5G49650.1	3702.AT5G59290.2 UXS5	XK-2	UXS3
GO Process GO:0009746 Response to hexose 6 63 0.77 0.0172 3702.AT1G12000.1	3702.AT1G18080.1	3702.AT1G43670.1	3702.AT1G76550.1	3702.AT4G04040.1	3702.AT5G20830.1 AT1G12000	ATARCA	FBP	AT1G76550	MEE51	SUS1
GO Process GO:0006573 Valine metabolic process 4 23 1.03 0.0176 3702.AT1G50110.1	3702.AT1G71170.1	3702.AT3G49680.1	3702.AT4G29120.1 AT1G50110	AT1G71170	BCAT3	AT4G29120
GO Process GO:0009414 Response to water deprivation 14 315 0.44 0.0187 3702.AT1G20450.1	3702.AT1G35720.1	3702.AT1G44170.2	3702.AT1G54100.1	3702.AT1G74920.1	3702.AT1G78380.1	3702.AT2G30870.1	3702.AT3G12490.2	3702.AT3G46970.1	3702.AT3G52880.2	3702.AT3G59380.1	3702.AT4G34890.1	3702.AT5G20830.1	3702.AT5G52310.1 ERD10	ANNAT1	ALDH3H1	ALDH7B4	ALDH10A8	GSTU19	GSTF10	CYSB	PHS2	MDAR1	FTA	XDH1	SUS1	LTI78
GO Process GO:0044272 Sulfur compound biosynthetic process 9 147 0.58 0.0193 3702.AT1G02880.3	3702.AT1G50110.1	3702.AT3G03780.1	3702.AT3G16950.2	3702.AT3G16990.1	3702.AT4G13430.1	3702.AT4G19710.2	3702.AT5G04590.1	3702.AT5G56760.1 TPK1	AT1G50110	MS2	LPD1	AT3G16990	IIL1	AKHSDH2	SIR	SERAT1;1
GO Process GO:0019682 glyceraldehyde-3-phosphate metabolic process 3 10 1.27 0.0211 3702.AT2G21170.1	3702.AT3G55440.1	3702.AT5G60600.1 TIM	TPI	HDS
GO Process GO:0030490 Maturation of ssu-rrna 4 25 0.99 0.0225 3702.AT2G09990.1	3702.AT2G43810.1	3702.AT3G52580.1	3702.AT5G03850.1 AT2G09990	LSM6B	AT3G52580	AT3G10090
GO Process GO:0006399 tRNA metabolic process 8 121 0.61 0.0226 3702.AT1G28350.1	3702.AT1G29880.1	3702.AT1G36310.1	3702.AT1G52160.1	3702.AT2G03800.1	3702.AT2G33840.1	3702.AT5G15810.1	3702.AT5G27470.1 AT1G28350	AT1G29880	AT1G36310	TRZ3	GEK1	AT2G33840	AT5G15810	AT5G27470
GO Process GO:0009814 Defense response	incompatible interaction 9 151 0.57 0.0226 3702.AT1G20020.1	3702.AT1G51360.1	3702.AT1G55490.2	3702.AT2G27040.2	3702.AT3G60820.1	3702.AT4G37000.1	3702.AT5G42740.1	3702.AT5G51700.1	3702.AT5G60600.1 FNR2	DABB1	CPN60B	AGO4	PBF1	ACD2	AT5G42740	PBS2	HDS
GO Process GO:0051707 Response to other organism 35 1226 0.25 0.0227 3702.AT1G13440.1	3702.AT1G14320.1	3702.AT1G19570.1	3702.AT1G20020.1	3702.AT1G32060.1	3702.AT1G51360.1	3702.AT1G55490.2	3702.AT1G69370.1	3702.AT1G79210.2	3702.AT1G80460.1	3702.AT2G22240.1	3702.AT2G27040.2	3702.AT2G30860.1	3702.AT2G45820.1	3702.AT3G04790.1	3702.AT3G12500.1	3702.AT3G17210.1	3702.AT3G18740.1	3702.AT3G23400.1	3702.AT3G25780.1	3702.AT3G27850.1	3702.AT3G52880.2	3702.AT3G54640.1	3702.AT3G55800.1	3702.AT3G60820.1	3702.AT4G37000.1	3702.AT5G06290.1	3702.AT5G08280.1	3702.AT5G42740.1	3702.AT5G42980.1	3702.AT5G51700.1	3702.AT5G52310.1	3702.AT5G60600.1	3702.AT5G61410.1	3702.AT5G64120.1 GAPC2	SAC52	DHAR1	FNR2	PRK	DABB1	CPN60B	CM3	AT1G79210	NHO1	MIPS2	AGO4	GSTF9	AT2G45820	EMB3119	HCHIB
GO Process GO:0009817 Defense response to fungus	incompatible interaction 5 45 0.84 0.0235 3702.AT1G20020.1	3702.AT1G51360.1	3702.AT3G60820.1	3702.AT5G42740.1	3702.AT5G51700.1 FNR2	DABB1	PBF1	AT5G42740	PBS2
GO Process GO:0044275 Cellular carbohydrate catabolic process 6 69 0.73 0.0250 3702.AT1G35580.2	3702.AT1G43670.1	3702.AT1G80460.1	3702.AT2G21170.1	3702.AT3G46970.1	3702.AT3G55440.1 CINV1	FBP	NHO1	TIM	PHS2	TPI
GO Process GO:0000097 Sulfur amino acid biosynthetic process 5 46 0.83 0.0254 3702.AT1G50110.1	3702.AT3G03780.1	3702.AT4G19710.2	3702.AT5G04590.1	3702.AT5G56760.1 AT1G50110	MS2	AKHSDH2	SIR	SERAT1;1
GO Process GO:0006559 L-phenylalanine catabolic process 3 11 1.23 0.0254 3702.AT1G06570.1	3702.AT1G12050.1	3702.AT2G02390.3 PDS1	AT1G12050	GSTZ1
GO Process GO:0009407 Toxin catabolic process 5 46 0.83 0.0254 3702.AT1G78380.1	3702.AT2G02390.3	3702.AT2G29450.1	3702.AT2G30860.1	3702.AT2G30870.1 GSTU19	GSTZ1	GSTU5	GSTF9	GSTF10
GO Process GO:0030388 Fructose 1	6-bisphosphate metabolic process 3 11 1.23 0.0254 3702.AT1G43670.1	3702.AT2G21330.1	3702.AT3G55800.1 FBP	FBA1	SBPASE
GO Process GO:0070925 Organelle assembly 9 155 0.55 0.0254 3702.AT1G14320.1	3702.AT1G18540.1	3702.AT1G74050.1	3702.AT1G76860.1	3702.AT3G52580.1	3702.AT3G53430.1	3702.AT3G55620.1	3702.AT3G61110.1	3702.AT5G03850.1 SAC52	AT1G18540	AT1G74050	LSM3B	AT3G52580	AT3G53430	eIF6A	RS27A	AT3G10090
GO Process GO:0046166 glyceraldehyde-3-phosphate biosynthetic process 2 2 1.79 0.0285 3702.AT2G21170.1	3702.AT3G55440.1 TIM	TPI
GO Process GO:0110051 Metabolite repair 2 2 1.79 0.0285 3702.AT4G08790.1	3702.AT5G19150.1 AT4G08790	AT5G19150
GO Process GO:0016036 Cellular response to phosphate starvation 6 72 0.71 0.0293 3702.AT1G53310.3	3702.AT2G02990.1	3702.AT2G22240.1	3702.AT2G27190.1	3702.AT3G03520.1	3702.AT5G38480.1 PPC1	RNS1	MIPS2	PAP12	NPC3	RCI1A
GO Process GO:0005986 Sucrose biosynthetic process 3 12 1.19 0.0300 3702.AT1G43670.1	3702.AT2G35840.3	3702.AT3G55800.1 FBP	AT2G35840	SBPASE
GO Process GO:0006555 Methionine metabolic process 4 28 0.95 0.0300 3702.AT1G50110.1	3702.AT1G80360.1	3702.AT3G03780.1	3702.AT4G19710.2 AT1G50110	AT1G80360	MS2	AKHSDH2
GO Process GO:0006734 NADH metabolic process 3 12 1.19 0.0300 3702.AT1G04410.1	3702.AT5G19150.1	3702.AT5G20070.1 c-NAD-MDH1	AT5G19150	NUDX19
GO Process GO:0009608 Response to symbiont 3 12 1.19 0.0300 3702.AT1G19570.1	3702.AT3G52880.2	3702.AT5G52310.1 DHAR1	MDAR1	LTI78
GO Process GO:0043650 Dicarboxylic acid biosynthetic process 4 28 0.95 0.0300 3702.AT1G50480.1	3702.AT3G06350.1	3702.AT3G60880.2	3702.AT5G66120.2 THFS	MEE32	DHDPS1	AT5G66120
GO Process GO:0046173 Polyol biosynthetic process 4 28 0.95 0.0300 3702.AT1G31190.1	3702.AT2G22240.1	3702.AT4G39800.1	3702.AT5G16760.1 IMPL1	MIPS2	MIPS1	ITPK1
GO Process GO:0046685 Response to arsenic-containing substance 3 12 1.19 0.0300 3702.AT3G16950.2	3702.AT4G16155.1	3702.AT5G42790.1 LPD1	AT4G16155	PAF1
GO Process GO:0019748 Secondary metabolic process 13 300 0.43 0.0308 3702.AT1G50110.1	3702.AT1G72680.1	3702.AT1G78380.1	3702.AT1G80360.1	3702.AT2G02390.3	3702.AT2G22970.3	3702.AT2G29450.1	3702.AT2G30860.1	3702.AT2G30870.1	3702.AT4G12910.1	3702.AT4G13430.1	3702.AT5G05340.1	3702.AT5G64120.1 AT1G50110	CADG	GSTU19	AT1G80360	GSTZ1	SCPL11	GSTU5	GSTF9	GSTF10	scpl20	IIL1	PRX52	AT5G64120
GO Process GO:0034404 Nucleobase-containing small molecule biosynthetic process 4 29 0.93 0.0331 3702.AT3G09820.1	3702.AT4G13720.1	3702.AT5G20070.1	3702.AT5G63310.1 At3g09820	AT4G13720	NUDX19	NDPK2
GO Process GO:0019363 Pyridine nucleotide biosynthetic process 3 13 1.15 0.0352 3702.AT1G55090.1	3702.AT2G22570.1	3702.AT4G36940.1 AT1G55090	NIC1	NAPRT1
GO Process GO:0051156 Glucose 6-phosphate metabolic process 4 30 0.92 0.0367 3702.AT3G04790.1	3702.AT3G60750.1	3702.AT5G42740.1	3702.AT5G61410.1 EMB3119	AT3G60750	AT5G42740	RPE
GO Process GO:0098542 Defense response to other organism 29 991 0.26 0.0375 3702.AT1G13440.1	3702.AT1G14320.1	3702.AT1G20020.1	3702.AT1G32060.1	3702.AT1G51360.1	3702.AT1G55490.2	3702.AT1G69370.1	3702.AT1G79210.2	3702.AT1G80460.1	3702.AT2G22240.1	3702.AT2G27040.2	3702.AT2G30860.1	3702.AT2G45820.1	3702.AT3G04790.1	3702.AT3G12500.1	3702.AT3G17210.1	3702.AT3G23400.1	3702.AT3G27850.1	3702.AT3G54640.1	3702.AT3G55800.1	3702.AT3G60820.1	3702.AT4G37000.1	3702.AT5G06290.1	3702.AT5G08280.1	3702.AT5G42740.1	3702.AT5G42980.1	3702.AT5G51700.1	3702.AT5G60600.1	3702.AT5G64120.1 GAPC2	SAC52	FNR2	PRK	DABB1	CPN60B	CM3	AT1G79210	NHO1	MIPS2	AGO4	GSTF9	AT2G45820	EMB3119	HCHIB	HS1	FIB4	RPL12-C	TSA2	SBPASE	PBF1	ACD2
GO Process GO:0006099 Tricarboxylic acid cycle 5 52 0.77 0.0384 3702.AT1G04410.1	3702.AT1G53310.3	3702.AT2G42600.1	3702.AT3G14940.1	3702.AT4G35830.1 c-NAD-MDH1	PPC1	PPC2	PPC3	At4g35830
GO Process GO:0072522 Purine-containing compound biosynthetic process 7 106 0.61 0.0406 3702.AT1G50480.1	3702.AT2G42910.1	3702.AT3G01390.2	3702.AT3G09820.1	3702.AT3G16950.2	3702.AT3G18030.1	3702.AT5G63310.1 THFS	AT2G42910	VMA10	At3g09820	LPD1	HAL3A	NDPK2
GO Process GO:0006801 Superoxide metabolic process 3 14 1.12 0.0412 3702.AT2G17420.1	3702.AT4G25100.1	3702.AT4G34890.1 NTRA	FSD1	XDH1
GO Process GO:0009081 Branched-chain amino acid metabolic process 5 53 0.77 0.0412 3702.AT1G50110.1	3702.AT1G71170.1	3702.AT3G49680.1	3702.AT4G13430.1	3702.AT4G29120.1 AT1G50110	AT1G71170	BCAT3	IIL1	AT4G29120
GO Process GO:0019725 Cellular homeostasis 11 238 0.46 0.0412 3702.AT2G15570.2	3702.AT2G40300.1	3702.AT3G15360.1	3702.AT3G16950.2	3702.AT3G56240.1	3702.AT4G16155.1	3702.AT4G36910.1	3702.AT5G06290.1	3702.AT5G20500.1	3702.AT5G40370.2	3702.AT5G42980.1 ATHM3	FER4	TRX-M4	LPD1	CCH	AT4G16155	LEJ2	At5g06290	AT5G20500	GRXC2	TRX3
GO Process GO:0019249 Lactate biosynthetic process 2 3 1.61 0.0434 3702.AT3G02720.1	3702.AT3G14990.1 DJ1D	DJ1A
GO Process GO:0019365 Pyridine nucleotide salvage 2 3 1.61 0.0434 3702.AT2G22570.1	3702.AT4G36940.1 NIC1	NAPRT1
GO Process GO:1902000 Homogentisate catabolic process 2 3 1.61 0.0434 3702.AT1G12050.1	3702.AT2G02390.3 AT1G12050	GSTZ1
GO Process GO:0009098 Leucine biosynthetic process 3 15 1.09 0.0477 3702.AT1G50110.1	3702.AT3G49680.1	3702.AT4G13430.1 AT1G50110	BCAT3	IIL1
GO Process GO:0009749 Response to glucose 5 56 0.74 0.0497 3702.AT1G12000.1	3702.AT1G18080.1	3702.AT1G76550.1	3702.AT4G04040.1	3702.AT5G20830.1 AT1G12000	ATARCA	AT1G76550	MEE51	SUS1
GO Function GO:0003824 Catalytic activity 236 6726 0.34 3.68e-34 3702.AT1G01050.1	3702.AT1G02170.1	3702.AT1G02880.3	3702.AT1G04410.1	3702.AT1G05350.1	3702.AT1G05620.1	3702.AT1G06570.1	3702.AT1G09010.1	3702.AT1G11840.6	3702.AT1G11910.1	3702.AT1G12000.1	3702.AT1G12050.1	3702.AT1G12900.1	3702.AT1G13060.2	3702.AT1G13440.1	3702.AT1G15000.1	3702.AT1G15710.1	3702.AT1G17890.1	3702.AT1G19570.1	3702.AT1G20010.1	3702.AT1G20020.1	3702.AT1G21720.1	3702.AT1G23190.1	3702.AT1G23820.1	3702.AT1G26570.1	3702.AT1G28350.1	3702.AT1G29880.1	3702.AT1G30510.2	3702.AT1G31190.1	3702.AT1G32060.1	3702.AT1G35580.2	3702.AT1G35720.1	3702.AT1G36310.1	3702.AT1G42970.1	3702.AT1G43670.1	3702.AT1G43890.1	3702.AT1G44170.2	3702.AT1G50110.1	3702.AT1G50170.1	3702.AT1G50480.1	3702.AT1G52160.1	3702.AT1G52570.1	3702.AT1G53310.3	3702.AT1G54100.1	3702.AT1G55090.1	3702.AT1G56450.1	3702.AT1G60690.1	3702.AT1G60710.1	3702.AT1G60730.3	3702.AT1G62810.1
GO Function GO:0003735 Structural constituent of ribosome 42 308 0.93 2.23e-21 3702.AT1G08360.1	3702.AT1G14320.1	3702.AT1G15930.1	3702.AT1G18080.1	3702.AT1G18540.1	3702.AT1G33120.1	3702.AT1G74050.1	3702.AT2G01250.1	3702.AT2G05840.1	3702.AT2G09990.1	3702.AT2G19730.3	3702.AT2G27530.1	3702.AT2G27720.2	3702.AT2G34480.1	3702.AT2G39390.1	3702.AT2G40590.1	3702.AT2G44120.2	3702.AT3G02560.2	3702.AT3G04400.1	3702.AT3G07110.2	3702.AT3G09500.1	3702.AT3G10610.1	3702.AT3G13580.3	3702.AT3G16080.1	3702.AT3G18740.1	3702.AT3G27850.1	3702.AT3G52580.1	3702.AT3G53430.1	3702.AT3G53870.1	3702.AT3G60245.1	3702.AT3G61110.1	3702.AT3G62250.1	3702.AT3G62870.1	3702.AT4G00810.1	3702.AT4G15000.1	3702.AT4G18100.1	3702.AT4G29410.1	3702.AT4G34555.1	3702.AT4G36130.1	3702.AT5G03850.1	3702.AT5G27850.1	3702.AT5G67510.1 AT1G08360	SAC52	AT1G15930	ATARCA	AT1G18540	RPL9B	AT1G74050	AT2G01250	At2g05840
GO Function GO:0005198 Structural molecule activity 44 412 0.82 7.96e-19 3702.AT1G08360.1	3702.AT1G14320.1	3702.AT1G15930.1	3702.AT1G18080.1	3702.AT1G18540.1	3702.AT1G20010.1	3702.AT1G33120.1	3702.AT1G74050.1	3702.AT2G01250.1	3702.AT2G05840.1	3702.AT2G09990.1	3702.AT2G19730.3	3702.AT2G20760.1	3702.AT2G27530.1	3702.AT2G27720.2	3702.AT2G34480.1	3702.AT2G39390.1	3702.AT2G40590.1	3702.AT2G44120.2	3702.AT3G02560.2	3702.AT3G04400.1	3702.AT3G07110.2	3702.AT3G09500.1	3702.AT3G10610.1	3702.AT3G13580.3	3702.AT3G16080.1	3702.AT3G18740.1	3702.AT3G27850.1	3702.AT3G52580.1	3702.AT3G53430.1	3702.AT3G53870.1	3702.AT3G60245.1	3702.AT3G61110.1	3702.AT3G62250.1	3702.AT3G62870.1	3702.AT4G00810.1	3702.AT4G15000.1	3702.AT4G18100.1	3702.AT4G29410.1	3702.AT4G34555.1	3702.AT4G36130.1	3702.AT5G03850.1	3702.AT5G27850.1	3702.AT5G67510.1 AT1G08360	SAC52	AT1G15930	ATARCA	AT1G18540	TUB5	RPL9B
GO Function GO:0004298 Threonine-type endopeptidase activity 16 25 1.6 4.36e-16 3702.AT1G13060.2	3702.AT1G21720.1	3702.AT1G56450.1	3702.AT1G77440.1	3702.AT1G79210.2	3702.AT2G05840.1	3702.AT2G27020.1	3702.AT3G22110.1	3702.AT3G26340.1	3702.AT3G27430.2	3702.AT3G51260.1	3702.AT3G60820.1	3702.AT4G14800.2	3702.AT4G31300.2	3702.AT5G35590.1	3702.AT5G42790.1 PBE1	PBC1	PBG1	PBC2	AT1G79210	At2g05840	PAG1	PAC1	AT3G26340	PBB1	PAD1	PBF1	PBD2	PBA1	At5g35590	PAF1
GO Function GO:0070003 Threonine-type peptidase activity 17 32 1.52 4.36e-16 3702.AT1G13060.2	3702.AT1G21720.1	3702.AT1G56450.1	3702.AT1G77440.1	3702.AT1G79210.2	3702.AT2G05840.1	3702.AT2G27020.1	3702.AT3G22110.1	3702.AT3G26340.1	3702.AT3G27430.2	3702.AT3G51260.1	3702.AT3G60820.1	3702.AT4G14800.2	3702.AT4G31300.2	3702.AT5G08100.1	3702.AT5G35590.1	3702.AT5G42790.1 PBE1	PBC1	PBG1	PBC2	AT1G79210	At2g05840	PAG1	PAC1	AT3G26340	PBB1	PAD1	PBF1	PBD2	PBA1	ASPGA1	At5g35590	PAF1
GO Function GO:0016491 Oxidoreductase activity 66 1202 0.53 7.45e-15 3702.AT1G04410.1	3702.AT1G06570.1	3702.AT1G11840.6	3702.AT1G12900.1	3702.AT1G13440.1	3702.AT1G15710.1	3702.AT1G17890.1	3702.AT1G19570.1	3702.AT1G20020.1	3702.AT1G26570.1	3702.AT1G30510.2	3702.AT1G35720.1	3702.AT1G42970.1	3702.AT1G44170.2	3702.AT1G50480.1	3702.AT1G54100.1	3702.AT1G60690.1	3702.AT1G60710.1	3702.AT1G60730.3	3702.AT1G62810.1	3702.AT1G67090.1	3702.AT1G71170.1	3702.AT1G72680.1	3702.AT1G74920.1	3702.AT1G78380.1	3702.AT2G02390.3	3702.AT2G04700.1	3702.AT2G17420.1	3702.AT2G25060.1	3702.AT2G27150.2	3702.AT2G30860.1	3702.AT2G40300.1	3702.AT2G43710.1	3702.AT3G06350.1	3702.AT3G12290.1	3702.AT3G15360.1	3702.AT3G16950.2	3702.AT3G25530.1	3702.AT3G29200.1	3702.AT3G29360.1	3702.AT3G43600.1	3702.AT3G52880.2	3702.AT4G05390.1	3702.AT4G09670.1	3702.AT4G16155.1	3702.AT4G19710.2	3702.AT4G25100.1	3702.AT4G29120.1	3702.AT4G34200.1	3702.AT4G34890.1
GO Function GO:0016829 Lyase activity 34 312 0.83 9.47e-15 3702.AT1G11840.6	3702.AT1G50170.1	3702.AT1G53310.3	3702.AT1G65960.2	3702.AT1G67090.1	3702.AT1G67280.1	3702.AT1G70410.2	3702.AT2G02990.1	3702.AT2G21330.1	3702.AT2G29560.1	3702.AT2G36530.1	3702.AT2G42600.1	3702.AT3G02720.1	3702.AT3G02770.1	3702.AT3G04520.1	3702.AT3G06350.1	3702.AT3G14940.1	3702.AT3G14990.1	3702.AT3G16050.1	3702.AT3G18030.1	3702.AT3G23490.1	3702.AT3G46440.2	3702.AT3G51160.1	3702.AT3G54640.1	3702.AT3G60880.2	3702.AT4G02610.1	3702.AT4G13430.1	3702.AT4G27070.1	3702.AT4G35830.1	3702.AT5G01410.1	3702.AT5G16450.2	3702.AT5G19150.1	3702.AT5G59290.2	3702.AT5G66120.2 GLX1	SIRB	PPC1	GAD2	RBCS1A	AT1G67280	BCA4	RNS1	FBA1	ENOC	LOS2	PPC2	DJ1D	AT3G02770	THA2	MEE32	PPC3
GO Function GO:0005488 Binding 213 8453 0.19 1.50e-11 3702.AT1G01050.1	3702.AT1G02880.3	3702.AT1G03330.1	3702.AT1G05350.1	3702.AT1G06570.1	3702.AT1G08360.1	3702.AT1G08780.1	3702.AT1G11840.6	3702.AT1G12000.1	3702.AT1G12050.1	3702.AT1G12310.1	3702.AT1G12900.1	3702.AT1G13440.1	3702.AT1G14320.1	3702.AT1G15340.1	3702.AT1G15500.1	3702.AT1G18080.1	3702.AT1G18210.1	3702.AT1G18540.1	3702.AT1G19570.1	3702.AT1G20010.1	3702.AT1G20020.1	3702.AT1G20450.1	3702.AT1G23190.1	3702.AT1G23820.1	3702.AT1G26570.1	3702.AT1G28350.1	3702.AT1G29880.1	3702.AT1G30510.2	3702.AT1G31190.1	3702.AT1G31340.1	3702.AT1G32060.1	3702.AT1G33120.1	3702.AT1G35720.1	3702.AT1G42970.1	3702.AT1G43670.1	3702.AT1G43890.1	3702.AT1G50170.1	3702.AT1G50480.1	3702.AT1G52160.1	3702.AT1G52570.1	3702.AT1G55090.1	3702.AT1G55490.2	3702.AT1G62810.1	3702.AT1G62820.1	3702.AT1G65960.2	3702.AT1G67090.1	3702.AT1G67280.1	3702.AT1G70410.2	3702.AT1G70730.3
GO Function GO:0008233 Peptidase activity 33 421 0.68 1.27e-10 3702.AT1G02170.1	3702.AT1G11910.1	3702.AT1G13060.2	3702.AT1G15000.1	3702.AT1G21720.1	3702.AT1G56450.1	3702.AT1G77440.1	3702.AT1G78680.1	3702.AT1G79210.2	3702.AT1G79690.1	3702.AT2G05840.1	3702.AT2G14260.1	3702.AT2G22970.3	3702.AT2G27020.1	3702.AT3G13235.1	3702.AT3G22110.1	3702.AT3G26340.1	3702.AT3G27430.2	3702.AT3G51260.1	3702.AT3G60820.1	3702.AT4G12910.1	3702.AT4G14570.1	3702.AT4G14800.2	3702.AT4G20430.1	3702.AT4G20850.1	3702.AT4G31300.2	3702.AT4G33090.1	3702.AT5G08100.1	3702.AT5G13520.1	3702.AT5G35590.1	3702.AT5G42790.1	3702.AT5G67360.1	3702.ATCG00670.1 MC1	APA1	PBE1	scpl50	PBC1	PBG1	PBC2	GGH2	AT1G79210	NUDT3	At2g05840	PIP	SCPL11	PAG1	DDI1	PAC1	AT3G26340	PBB1
GO Function GO:0005507 Copper ion binding 19 158 0.87 1.55e-08 3702.AT1G13440.1	3702.AT1G19570.1	3702.AT1G20450.1	3702.AT1G30510.2	3702.AT1G35720.1	3702.AT1G50480.1	3702.AT1G62810.1	3702.AT1G67090.1	3702.AT2G30860.1	3702.AT2G30870.1	3702.AT2G36530.1	3702.AT3G09820.1	3702.AT3G55440.1	3702.AT3G56240.1	3702.AT4G05390.1	3702.AT4G25100.1	3702.AT4G35830.1	3702.AT5G04590.1	3702.AT5G19550.1 GAPC2	DHAR1	ERD10	RFNR2	ANNAT1	THFS	CuAO1	RBCS1A	GSTF9	GSTF10	LOS2	At3g09820	TPI	CCH	RFNR1	FSD1	At4g35830	SIR	ASP2
GO Function GO:0016787 Hydrolase activity 82 2363 0.33 1.55e-08 3702.AT1G01050.1	3702.AT1G02170.1	3702.AT1G05620.1	3702.AT1G09010.1	3702.AT1G11910.1	3702.AT1G12050.1	3702.AT1G13060.2	3702.AT1G15000.1	3702.AT1G20010.1	3702.AT1G21720.1	3702.AT1G31190.1	3702.AT1G35580.2	3702.AT1G43670.1	3702.AT1G43890.1	3702.AT1G50480.1	3702.AT1G52160.1	3702.AT1G52570.1	3702.AT1G55090.1	3702.AT1G56450.1	3702.AT1G77440.1	3702.AT1G78680.1	3702.AT1G79210.2	3702.AT1G79690.1	3702.AT2G02990.1	3702.AT2G03800.1	3702.AT2G05840.1	3702.AT2G14260.1	3702.AT2G18230.1	3702.AT2G22570.1	3702.AT2G22970.3	3702.AT2G27020.1	3702.AT2G27040.2	3702.AT2G27190.1	3702.AT2G28100.1	3702.AT2G35840.3	3702.AT2G41530.1	3702.AT2G42690.1	3702.AT3G03520.1	3702.AT3G10850.1	3702.AT3G12290.1	3702.AT3G12500.1	3702.AT3G13235.1	3702.AT3G16990.1	3702.AT3G22110.1	3702.AT3G26340.1	3702.AT3G26720.1	3702.AT3G27430.2	3702.AT3G51260.1	3702.AT3G53620.1	3702.AT3G55260.1
GO Function GO:0004175 Endopeptidase activity 24 272 0.74 1.61e-08 3702.AT1G02170.1	3702.AT1G11910.1	3702.AT1G13060.2	3702.AT1G21720.1	3702.AT1G56450.1	3702.AT1G77440.1	3702.AT1G79210.2	3702.AT2G05840.1	3702.AT2G27020.1	3702.AT3G13235.1	3702.AT3G22110.1	3702.AT3G26340.1	3702.AT3G27430.2	3702.AT3G51260.1	3702.AT3G60820.1	3702.AT4G14570.1	3702.AT4G14800.2	3702.AT4G20430.1	3702.AT4G20850.1	3702.AT4G31300.2	3702.AT5G35590.1	3702.AT5G42790.1	3702.AT5G67360.1	3702.ATCG00670.1 MC1	APA1	PBE1	PBC1	PBG1	PBC2	AT1G79210	At2g05840	PAG1	DDI1	PAC1	AT3G26340	PBB1	PAD1	PBF1	AARE	PBD2	AT4G20430	TPP2	PBA1	At5g35590	PAF1	ARA12	PCLPP
GO Function GO:0016836 Hydro-lyase activity 14 77 1.05 3.15e-08 3702.AT1G70410.2	3702.AT2G29560.1	3702.AT2G36530.1	3702.AT3G02720.1	3702.AT3G06350.1	3702.AT3G14990.1	3702.AT3G51160.1	3702.AT3G54640.1	3702.AT3G60880.2	3702.AT4G02610.1	3702.AT4G13430.1	3702.AT4G27070.1	3702.AT4G35830.1	3702.AT5G19150.1 BCA4	ENOC	LOS2	DJ1D	MEE32	DJ1A	MUR1	TSA2	DHDPS1	AT4G02610	IIL1	TSB2	At4g35830	AT5G19150
GO Function GO:0043169 Cation binding 96 3039 0.29 3.15e-08 3702.AT1G01050.1	3702.AT1G05350.1	3702.AT1G06570.1	3702.AT1G11840.6	3702.AT1G12000.1	3702.AT1G12050.1	3702.AT1G12310.1	3702.AT1G13440.1	3702.AT1G18210.1	3702.AT1G19570.1	3702.AT1G20450.1	3702.AT1G23190.1	3702.AT1G30510.2	3702.AT1G31190.1	3702.AT1G35720.1	3702.AT1G43670.1	3702.AT1G50170.1	3702.AT1G50480.1	3702.AT1G52160.1	3702.AT1G52570.1	3702.AT1G62810.1	3702.AT1G62820.1	3702.AT1G67090.1	3702.AT1G67280.1	3702.AT1G70410.2	3702.AT1G70730.3	3702.AT1G72680.1	3702.AT1G76550.1	3702.AT1G79690.1	3702.AT2G03800.1	3702.AT2G04700.1	3702.AT2G16060.1	3702.AT2G18230.1	3702.AT2G27150.2	3702.AT2G27190.1	3702.AT2G29560.1	3702.AT2G30860.1	3702.AT2G30870.1	3702.AT2G35840.3	3702.AT2G36530.1	3702.AT2G40300.1	3702.AT2G42910.1	3702.AT2G43710.1	3702.AT3G01520.1	3702.AT3G02770.1	3702.AT3G03780.1	3702.AT3G09820.1	3702.AT3G10850.1	3702.AT3G12490.2	3702.AT3G16080.1
GO Function GO:0046872 Metal ion binding 95 3023 0.29 4.73e-08 3702.AT1G01050.1	3702.AT1G05350.1	3702.AT1G06570.1	3702.AT1G11840.6	3702.AT1G12000.1	3702.AT1G12050.1	3702.AT1G12310.1	3702.AT1G13440.1	3702.AT1G18210.1	3702.AT1G19570.1	3702.AT1G20450.1	3702.AT1G23190.1	3702.AT1G30510.2	3702.AT1G31190.1	3702.AT1G35720.1	3702.AT1G43670.1	3702.AT1G50170.1	3702.AT1G50480.1	3702.AT1G52160.1	3702.AT1G52570.1	3702.AT1G62810.1	3702.AT1G62820.1	3702.AT1G67090.1	3702.AT1G67280.1	3702.AT1G70410.2	3702.AT1G70730.3	3702.AT1G72680.1	3702.AT1G76550.1	3702.AT1G79690.1	3702.AT2G03800.1	3702.AT2G04700.1	3702.AT2G16060.1	3702.AT2G18230.1	3702.AT2G27150.2	3702.AT2G27190.1	3702.AT2G29560.1	3702.AT2G30860.1	3702.AT2G30870.1	3702.AT2G35840.3	3702.AT2G36530.1	3702.AT2G40300.1	3702.AT2G42910.1	3702.AT2G43710.1	3702.AT3G02770.1	3702.AT3G03780.1	3702.AT3G09820.1	3702.AT3G10850.1	3702.AT3G12490.2	3702.AT3G16080.1	3702.AT3G17210.1
GO Function GO:0016830 Carbon-carbon lyase activity 14 98 0.95 4.25e-07 3702.AT1G53310.3	3702.AT1G65960.2	3702.AT1G67090.1	3702.AT2G21330.1	3702.AT2G42600.1	3702.AT3G02770.1	3702.AT3G04520.1	3702.AT3G14940.1	3702.AT3G18030.1	3702.AT3G46440.2	3702.AT3G54640.1	3702.AT4G02610.1	3702.AT5G16450.2	3702.AT5G59290.2 PPC1	GAD2	RBCS1A	FBA1	PPC2	AT3G02770	THA2	PPC3	HAL3A	UXS5	TSA2	AT4G02610	AT5G16450	UXS3
GO Function GO:0051287 NAD binding 12 68 1.04 6.49e-07 3702.AT1G12900.1	3702.AT1G13440.1	3702.AT1G26570.1	3702.AT1G42970.1	3702.AT1G71170.1	3702.AT3G25530.1	3702.AT3G29360.1	3702.AT3G46440.2	3702.AT4G29120.1	3702.AT4G34200.1	3702.AT5G15490.1	3702.AT5G59290.2 GAPA-2	GAPC2	UGD1	GAPB	AT1G71170	GLYR1	UGD2	UXS5	AT4G29120	EDA9	UGD3	UXS3
GO Function GO:0043167 Ion binding 134 5185 0.2 1.22e-06 3702.AT1G01050.1	3702.AT1G02880.3	3702.AT1G05350.1	3702.AT1G06570.1	3702.AT1G11840.6	3702.AT1G12000.1	3702.AT1G12050.1	3702.AT1G12310.1	3702.AT1G13440.1	3702.AT1G15500.1	3702.AT1G18210.1	3702.AT1G19570.1	3702.AT1G20010.1	3702.AT1G20450.1	3702.AT1G23190.1	3702.AT1G23820.1	3702.AT1G28350.1	3702.AT1G29880.1	3702.AT1G30510.2	3702.AT1G31190.1	3702.AT1G32060.1	3702.AT1G35720.1	3702.AT1G43670.1	3702.AT1G43890.1	3702.AT1G50170.1	3702.AT1G50480.1	3702.AT1G52160.1	3702.AT1G52570.1	3702.AT1G55090.1	3702.AT1G55490.2	3702.AT1G62810.1	3702.AT1G62820.1	3702.AT1G65960.2	3702.AT1G67090.1	3702.AT1G67280.1	3702.AT1G70410.2	3702.AT1G70730.3	3702.AT1G72680.1	3702.AT1G76550.1	3702.AT1G78380.1	3702.AT1G79690.1	3702.AT1G80360.1	3702.AT1G80460.1	3702.AT2G03800.1	3702.AT2G04700.1	3702.AT2G16060.1	3702.AT2G18230.1	3702.AT2G27150.2	3702.AT2G27190.1	3702.AT2G28000.1
GO Function GO:0016835 Carbon-oxygen lyase activity 15 140 0.82 3.39e-06 3702.AT1G70410.2	3702.AT2G29560.1	3702.AT2G36530.1	3702.AT3G02720.1	3702.AT3G06350.1	3702.AT3G14990.1	3702.AT3G51160.1	3702.AT3G54640.1	3702.AT3G60880.2	3702.AT4G02610.1	3702.AT4G13430.1	3702.AT4G27070.1	3702.AT4G35830.1	3702.AT5G19150.1	3702.AT5G66120.2 BCA4	ENOC	LOS2	DJ1D	MEE32	DJ1A	MUR1	TSA2	DHDPS1	AT4G02610	IIL1	TSB2	At4g35830	AT5G19150	AT5G66120
GO Function GO:0016853 Isomerase activity 18 218 0.71 5.66e-06 3702.AT1G17890.1	3702.AT1G23190.1	3702.AT1G69370.1	3702.AT1G70730.3	3702.AT2G02390.3	3702.AT2G21170.1	3702.AT2G22240.1	3702.AT3G04790.1	3702.AT3G25780.1	3702.AT3G29200.1	3702.AT3G55440.1	3702.AT3G63170.1	3702.AT4G13430.1	3702.AT4G39800.1	3702.AT5G10870.1	3702.AT5G16510.2	3702.AT5G42740.1	3702.AT5G61410.1 At1g17890	PGM3	CM3	PGM2	GSTZ1	TIM	MIPS2	EMB3119	AOC3	CM1	TPI	FAP1	IIL1	MIPS1	CM2	RGP5	AT5G42740	RPE
GO Function GO:0003723 RNA binding 40 954 0.41 9.57e-06 3702.AT1G03330.1	3702.AT1G08360.1	3702.AT1G14320.1	3702.AT1G18540.1	3702.AT1G20020.1	3702.AT1G33120.1	3702.AT1G74050.1	3702.AT1G76860.1	3702.AT2G01250.1	3702.AT2G02990.1	3702.AT2G09990.1	3702.AT2G27040.2	3702.AT2G27530.1	3702.AT2G34480.1	3702.AT2G39390.1	3702.AT2G40590.1	3702.AT2G43810.1	3702.AT2G44120.2	3702.AT3G02560.2	3702.AT3G04400.1	3702.AT3G07110.2	3702.AT3G09500.1	3702.AT3G13580.3	3702.AT3G16080.1	3702.AT3G18740.1	3702.AT3G52580.1	3702.AT3G53430.1	3702.AT3G53870.1	3702.AT3G55620.1	3702.AT3G61110.1	3702.AT3G62250.1	3702.AT3G62870.1	3702.AT4G27490.1	3702.AT4G35830.1	3702.AT4G36130.1	3702.AT5G02770.1	3702.AT5G15810.1	3702.AT5G27470.1	3702.AT5G27850.1	3702.AT5G67510.1 LSM2	AT1G08360	SAC52	AT1G18540	FNR2	RPL9B	AT1G74050	LSM3B	AT2G01250	RNS1	AT2G09990
GO Function GO:0016616 Oxidoreductase activity	acting on the ch-oh group of donors	nad or nadp as acceptor 14 135 0.81 1.22e-05 3702.AT1G04410.1	3702.AT1G17890.1	3702.AT1G26570.1	3702.AT1G71170.1	3702.AT1G72680.1	3702.AT3G06350.1	3702.AT3G25530.1	3702.AT3G29360.1	3702.AT4G19710.2	3702.AT4G29120.1	3702.AT4G34200.1	3702.AT5G15490.1	3702.AT5G24760.1	3702.AT5G51970.1 c-NAD-MDH1	At1g17890	UGD1	AT1G71170	CADG	MEE32	GLYR1	UGD2	AKHSDH2	AT4G29120	EDA9	UGD3	AT5G24760	AT5G51970
GO Function GO:0016831 Carboxy-lyase activity 10 60 1.01 1.48e-05 3702.AT1G53310.3	3702.AT1G65960.2	3702.AT1G67090.1	3702.AT2G42600.1	3702.AT3G02770.1	3702.AT3G14940.1	3702.AT3G18030.1	3702.AT3G46440.2	3702.AT5G16450.2	3702.AT5G59290.2 PPC1	GAD2	RBCS1A	PPC2	AT3G02770	PPC3	HAL3A	UXS5	AT5G16450	UXS3
GO Function GO:0016209 Antioxidant activity 14 151 0.76 3.95e-05 3702.AT1G19570.1	3702.AT1G35720.1	3702.AT1G78380.1	3702.AT2G02390.3	3702.AT2G17420.1	3702.AT2G30860.1	3702.AT3G29200.1	3702.AT4G25100.1	3702.AT5G05340.1	3702.AT5G06290.1	3702.AT5G06730.1	3702.AT5G20500.1	3702.AT5G40370.2	3702.AT5G64120.1 DHAR1	ANNAT1	GSTU19	GSTZ1	NTRA	GSTF9	CM1	FSD1	PRX52	At5g06290	AT5G06730	AT5G20500	GRXC2	AT5G64120
GO Function GO:0016810 Hydrolase activity	acting on carbon-nitrogen (but not peptide) bonds 11 103 0.82 0.00018 3702.AT1G50480.1	3702.AT1G55090.1	3702.AT2G22570.1	3702.AT3G12290.1	3702.AT3G16990.1	3702.AT4G08790.1	3702.AT4G17830.2	3702.AT4G34180.1	3702.AT5G08100.1	3702.AT5G37830.1	3702.AT5G64370.1 THFS	AT1G55090	NIC1	AT3G12290	AT3G16990	AT4G08790	AT4G17830	AT4G34180	ASPGA1	OXP1	BETA-UP
GO Function GO:0003872 6-phosphofructokinase activity 5 11 1.45 0.00030 3702.AT1G12000.1	3702.AT1G76550.1	3702.AT4G04040.1	3702.AT4G32840.1	3702.AT5G56630.1 AT1G12000	AT1G76550	MEE51	PFK6	PFK7
GO Function GO:0016903 Oxidoreductase activity	acting on the aldehyde or oxo group of donors 8 54 0.96 0.00045 3702.AT1G12900.1	3702.AT1G13440.1	3702.AT1G42970.1	3702.AT1G44170.2	3702.AT1G54100.1	3702.AT1G74920.1	3702.AT2G27150.2	3702.AT3G43600.1 GAPA-2	GAPC2	GAPB	ALDH3H1	ALDH7B4	ALDH10A8	AAO3	AAO2
GO Function GO:0016667 Oxidoreductase activity	acting on a sulfur group of donors 10 96 0.81 0.00055 3702.AT1G19570.1	3702.AT2G04700.1	3702.AT2G17420.1	3702.AT3G15360.1	3702.AT3G16950.2	3702.AT4G16155.1	3702.AT5G04590.1	3702.AT5G20500.1	3702.AT5G40370.2	3702.AT5G42980.1 DHAR1	AT2G04700	NTRA	TRX-M4	LPD1	AT4G16155	SIR	AT5G20500	GRXC2	TRX3
GO Function GO:0016668 Oxidoreductase activity	acting on a sulfur group of donors	nad(p) as acceptor 6 25 1.17 0.00056 3702.AT2G17420.1	3702.AT3G15360.1	3702.AT3G16950.2	3702.AT4G16155.1	3702.AT5G20500.1	3702.AT5G40370.2 NTRA	TRX-M4	LPD1	AT4G16155	AT5G20500	GRXC2
GO Function GO:0000287 Magnesium ion binding 11 128 0.72 0.00098 3702.AT1G01050.1	3702.AT1G23190.1	3702.AT1G70730.3	3702.AT2G18230.1	3702.AT2G29560.1	3702.AT2G35840.3	3702.AT2G36530.1	3702.AT2G42910.1	3702.AT3G53620.1	3702.AT5G16760.1	3702.AT5G27450.2 PPa1	PGM3	PGM2	PPa2	ENOC	AT2G35840	LOS2	AT2G42910	PPa4	ITPK1	MK
GO Function GO:0046914 Transition metal ion binding 33 915 0.35 0.0017 3702.AT1G13440.1	3702.AT1G19570.1	3702.AT1G20450.1	3702.AT1G30510.2	3702.AT1G35720.1	3702.AT1G50480.1	3702.AT1G62810.1	3702.AT1G67090.1	3702.AT1G70410.2	3702.AT1G72680.1	3702.AT2G27150.2	3702.AT2G30860.1	3702.AT2G30870.1	3702.AT2G36530.1	3702.AT2G40300.1	3702.AT3G03780.1	3702.AT3G09820.1	3702.AT3G12490.2	3702.AT3G43600.1	3702.AT3G55440.1	3702.AT3G56240.1	3702.AT4G05390.1	3702.AT4G25100.1	3702.AT4G33090.1	3702.AT4G34890.1	3702.AT4G35830.1	3702.AT5G04590.1	3702.AT5G13520.1	3702.AT5G19550.1	3702.AT5G24760.1	3702.AT5G51700.1	3702.AT5G51970.1	3702.AT5G60600.1 GAPC2	DHAR1	ERD10	RFNR2	ANNAT1	THFS	CuAO1	RBCS1A	BCA4	CADG	AAO3	GSTF9	GSTF10	LOS2	FER4	MS2	At3g09820	CYSB
GO Function GO:0016765 Transferase activity	transferring alkyl or aryl (other than methyl) groups 11 138 0.69 0.0018 3702.AT1G19570.1	3702.AT1G23820.1	3702.AT1G70310.1	3702.AT1G78380.1	3702.AT2G02390.3	3702.AT2G29450.1	3702.AT2G30860.1	3702.AT2G30870.1	3702.AT3G59380.1	3702.AT5G08280.1	3702.AT5G53120.6 DHAR1	SPDS1	SPDS2	GSTU19	GSTZ1	GSTU5	GSTF9	GSTF10	FTA	HEMC	SPDS3
GO Function GO:0016866 Intramolecular transferase activity 7 49 0.95 0.0018 3702.AT1G23190.1	3702.AT1G69370.1	3702.AT1G70730.3	3702.AT3G29200.1	3702.AT4G13430.1	3702.AT5G10870.1	3702.AT5G16510.2 PGM3	CM3	PGM2	CM1	IIL1	CM2	RGP5
GO Function GO:0050661 NADP binding 8 69 0.85 0.0018 3702.AT1G12900.1	3702.AT1G13440.1	3702.AT1G42970.1	3702.AT1G71170.1	3702.AT3G06350.1	3702.AT3G25530.1	3702.AT4G19710.2	3702.AT4G29120.1 GAPA-2	GAPC2	GAPB	AT1G71170	MEE32	GLYR1	AKHSDH2	AT4G29120
GO Function GO:0016811 Hydrolase activity	acting on carbon-nitrogen (but not peptide) bonds	in linear amides 7 50 0.94 0.0019 3702.AT1G55090.1	3702.AT2G22570.1	3702.AT4G08790.1	3702.AT4G17830.2	3702.AT4G34180.1	3702.AT5G08100.1	3702.AT5G64370.1 AT1G55090	NIC1	AT4G08790	AT4G17830	AT4G34180	ASPGA1	BETA-UP
GO Function GO:0019200 Carbohydrate kinase activity 6 34 1.04 0.0021 3702.AT1G12000.1	3702.AT1G76550.1	3702.AT4G04040.1	3702.AT4G32840.1	3702.AT5G49650.1	3702.AT5G56630.1 AT1G12000	AT1G76550	MEE51	PFK6	XK-2	PFK7
GO Function GO:0004177 Aminopeptidase activity 5 20 1.19 0.0022 3702.AT1G79690.1	3702.AT2G14260.1	3702.AT4G14570.1	3702.AT4G20850.1	3702.AT4G33090.1 NUDT3	PIP	AARE	TPP2	APM1
GO Function GO:0016730 Oxidoreductase activity	acting on iron-sulfur proteins as donors 4 9 1.44 0.0022 3702.AT1G20020.1	3702.AT1G30510.2	3702.AT2G04700.1	3702.AT4G05390.1 FNR2	RFNR2	AT2G04700	RFNR1
GO Function GO:0008238 Exopeptidase activity 8 77 0.81 0.0033 3702.AT1G15000.1	3702.AT1G79690.1	3702.AT2G14260.1	3702.AT2G22970.3	3702.AT4G12910.1	3702.AT4G14570.1	3702.AT4G20850.1	3702.AT4G33090.1 scpl50	NUDT3	PIP	SCPL11	scpl20	AARE	TPP2	APM1
GO Function GO:0004106 Chorismate mutase activity 3 3 1.79 0.0038 3702.AT1G69370.1	3702.AT3G29200.1	3702.AT5G10870.1 CM3	CM1	CM2
GO Function GO:0004766 Spermidine synthase activity 3 3 1.79 0.0038 3702.AT1G23820.1	3702.AT1G70310.1	3702.AT5G53120.6 SPDS1	SPDS2	SPDS3
GO Function GO:0016620 Oxidoreductase activity	acting on the aldehyde or oxo group of donors	nad or nadp as acceptor 6 39 0.98 0.0038 3702.AT1G12900.1	3702.AT1G13440.1	3702.AT1G42970.1	3702.AT1G44170.2	3702.AT1G54100.1	3702.AT1G74920.1 GAPA-2	GAPC2	GAPB	ALDH3H1	ALDH7B4	ALDH10A8
GO Function GO:0072341 Modified amino acid binding 5 25 1.09 0.0048 3702.AT1G20450.1	3702.AT1G78380.1	3702.AT2G29450.1	3702.AT2G30860.1	3702.AT2G30870.1 ERD10	GSTU19	GSTU5	GSTF9	GSTF10
GO Function GO:0036094 Small molecule binding 69 2687 0.2 0.0050 3702.AT1G02880.3	3702.AT1G05350.1	3702.AT1G12000.1	3702.AT1G12900.1	3702.AT1G13440.1	3702.AT1G15340.1	3702.AT1G15500.1	3702.AT1G20010.1	3702.AT1G23820.1	3702.AT1G26570.1	3702.AT1G28350.1	3702.AT1G29880.1	3702.AT1G32060.1	3702.AT1G35720.1	3702.AT1G42970.1	3702.AT1G43890.1	3702.AT1G50480.1	3702.AT1G55090.1	3702.AT1G55490.2	3702.AT1G65960.2	3702.AT1G71170.1	3702.AT1G76550.1	3702.AT1G80360.1	3702.AT1G80460.1	3702.AT2G16060.1	3702.AT2G27150.2	3702.AT2G28000.1	3702.AT2G33840.1	3702.AT2G42910.1	3702.AT3G01520.1	3702.AT3G06350.1	3702.AT3G09820.1	3702.AT3G16950.2	3702.AT3G25530.1	3702.AT3G29360.1	3702.AT3G43600.1	3702.AT3G46440.2	3702.AT3G46970.1	3702.AT3G51160.1	3702.AT3G52880.2	3702.AT3G63170.1	3702.AT4G04040.1	3702.AT4G13720.1	3702.AT4G16155.1	3702.AT4G16660.1	3702.AT4G19710.2	3702.AT4G29120.1	3702.AT4G32840.1	3702.AT4G33090.1	3702.AT4G34200.1
GO Function GO:0003979 UDP-glucose 6-dehydrogenase activity 3 4 1.67 0.0060 3702.AT1G26570.1	3702.AT3G29360.1	3702.AT5G15490.1 UGD1	UGD2	UGD3
GO Function GO:0004324 ferredoxin-NADP+ reductase activity 3 4 1.67 0.0060 3702.AT1G20020.1	3702.AT1G30510.2	3702.AT4G05390.1 FNR2	RFNR2	RFNR1
GO Function GO:0004462 Lactoylglutathione lyase activity 3 4 1.67 0.0060 3702.AT1G11840.6	3702.AT1G67280.1	3702.AT3G02720.1 GLX1	AT1G67280	DJ1D
GO Function GO:0004834 Tryptophan synthase activity 3 4 1.67 0.0060 3702.AT3G54640.1	3702.AT4G02610.1	3702.AT4G27070.1 TSA2	AT4G02610	TSB2
GO Function GO:0008964 Phosphoenolpyruvate carboxylase activity 3 4 1.67 0.0060 3702.AT1G53310.3	3702.AT2G42600.1	3702.AT3G14940.1 PPC1	PPC2	PPC3
GO Function GO:0047334 diphosphate-fructose-6-phosphate 1-phosphotransferase activity 3 4 1.67 0.0060 3702.AT1G12000.1	3702.AT1G76550.1	3702.AT4G04040.1 AT1G12000	AT1G76550	MEE51
GO Function GO:0004364 Glutathione transferase activity 6 53 0.84 0.0129 3702.AT1G19570.1	3702.AT1G78380.1	3702.AT2G02390.3	3702.AT2G29450.1	3702.AT2G30860.1	3702.AT2G30870.1 DHAR1	GSTU19	GSTZ1	GSTU5	GSTF9	GSTF10
GO Function GO:0004601 Peroxidase activity 9 127 0.64 0.0129 3702.AT1G35720.1	3702.AT1G78380.1	3702.AT2G02390.3	3702.AT2G30860.1	3702.AT3G29200.1	3702.AT5G05340.1	3702.AT5G06290.1	3702.AT5G06730.1	3702.AT5G64120.1 ANNAT1	GSTU19	GSTZ1	GSTF9	CM1	PRX52	At5g06290	AT5G06730	AT5G64120
GO Function GO:0016861 Intramolecular oxidoreductase activity	interconverting aldoses and ketoses 4 18 1.14 0.0134 3702.AT2G21170.1	3702.AT3G04790.1	3702.AT3G55440.1	3702.AT5G42740.1 TIM	EMB3119	TPI	AT5G42740
GO Function GO:0004365 glyceraldehyde-3-phosphate dehydrogenase (NAD+) (phosphorylating) activity 3 7 1.42 0.0158 3702.AT1G12900.1	3702.AT1G13440.1	3702.AT1G42970.1 GAPA-2	GAPC2	GAPB
GO Function GO:0016832 Aldehyde-lyase activity 4 19 1.11 0.0158 3702.AT2G21330.1	3702.AT3G04520.1	3702.AT3G54640.1	3702.AT4G02610.1 FBA1	THA2	TSA2	AT4G02610
GO Function GO:0043295 Glutathione binding 4 19 1.11 0.0158 3702.AT1G78380.1	3702.AT2G29450.1	3702.AT2G30860.1	3702.AT2G30870.1 GSTU19	GSTU5	GSTF9	GSTF10
GO Function GO:0003729 mRNA binding 15 332 0.45 0.0164 3702.AT1G14320.1	3702.AT2G01250.1	3702.AT2G34480.1	3702.AT2G39390.1	3702.AT2G40590.1	3702.AT3G02560.2	3702.AT3G07110.2	3702.AT3G09500.1	3702.AT3G13580.3	3702.AT3G18740.1	3702.AT3G52580.1	3702.AT3G53870.1	3702.AT3G62250.1	3702.AT4G35830.1	3702.AT5G27850.1 SAC52	AT2G01250	AT2G34480	AT2G39390	AT2G40590	AT3G02560	AT3G07110	AT3G09500	AT3G13580	AT3G18740	AT3G52580	AT3G53870	UBQ5	At4g35830	AT5G27850
GO Function GO:0140101 Catalytic activity	acting on a trna 7 82 0.72 0.0178 3702.AT1G28350.1	3702.AT1G29880.1	3702.AT1G36310.1	3702.AT2G03800.1	3702.AT2G33840.1	3702.AT5G15810.1	3702.AT5G27470.1 AT1G28350	AT1G29880	AT1G36310	GEK1	AT2G33840	AT5G15810	AT5G27470
GO Function GO:1901681 Sulfur compound binding 5 39 0.9 0.0205 3702.AT1G02880.3	3702.AT1G78380.1	3702.AT2G29450.1	3702.AT2G30860.1	3702.AT2G30870.1 TPK1	GSTU19	GSTU5	GSTF9	GSTF10
GO Function GO:0097159 Organic cyclic compound binding 115 5434 0.12 0.0375 3702.AT1G02880.3	3702.AT1G03330.1	3702.AT1G05350.1	3702.AT1G08360.1	3702.AT1G12000.1	3702.AT1G12900.1	3702.AT1G13440.1	3702.AT1G14320.1	3702.AT1G15340.1	3702.AT1G15500.1	3702.AT1G18540.1	3702.AT1G20010.1	3702.AT1G20020.1	3702.AT1G23820.1	3702.AT1G26570.1	3702.AT1G28350.1	3702.AT1G29880.1	3702.AT1G32060.1	3702.AT1G33120.1	3702.AT1G35720.1	3702.AT1G42970.1	3702.AT1G43890.1	3702.AT1G50480.1	3702.AT1G55090.1	3702.AT1G55490.2	3702.AT1G65960.2	3702.AT1G71170.1	3702.AT1G74050.1	3702.AT1G76550.1	3702.AT1G76860.1	3702.AT1G80360.1	3702.AT1G80460.1	3702.AT2G01250.1	3702.AT2G02990.1	3702.AT2G09990.1	3702.AT2G16060.1	3702.AT2G24940.1	3702.AT2G27040.2	3702.AT2G27150.2	3702.AT2G27530.1	3702.AT2G28000.1	3702.AT2G33840.1	3702.AT2G34480.1	3702.AT2G36530.1	3702.AT2G39390.1	3702.AT2G40590.1	3702.AT2G42910.1	3702.AT2G43810.1	3702.AT2G44120.2	3702.AT3G01520.1
GO Function GO:0031386 Protein tag 4 26 0.98 0.0383 3702.AT1G31340.1	3702.AT3G62250.1	3702.AT4G26840.1	3702.AT5G55160.2 RUB1	UBQ5	SUMO1	SUMO2
GO Function GO:0015038 Glutathione disulfide oxidoreductase activity 3 11 1.23 0.0386 3702.AT1G19570.1	3702.AT5G20500.1	3702.AT5G40370.2 DHAR1	AT5G20500	GRXC2
GO Function GO:0016872 Intramolecular lyase activity 3 11 1.23 0.0386 3702.AT2G22240.1	3702.AT3G63170.1	3702.AT4G39800.1 MIPS2	FAP1	MIPS1
GO Function GO:0051536 Iron-sulfur cluster binding 9 155 0.55 0.0386 3702.AT1G50170.1	3702.AT2G04700.1	3702.AT2G27150.2	3702.AT3G43600.1	3702.AT4G13430.1	3702.AT4G34890.1	3702.AT4G35830.1	3702.AT5G04590.1	3702.AT5G60600.1 SIRB	AT2G04700	AAO3	AAO2	IIL1	XDH1	At4g35830	SIR	HDS
GO Function GO:0004029 Aldehyde dehydrogenase (nad+) activity 3 12 1.19 0.0417 3702.AT1G44170.2	3702.AT1G54100.1	3702.AT1G74920.1 ALDH3H1	ALDH7B4	ALDH10A8
GO Function GO:0004807 Triose-phosphate isomerase activity 2 2 1.79 0.0417 3702.AT2G21170.1	3702.AT3G55440.1 TIM	TPI
GO Function GO:0016651 Oxidoreductase activity	acting on nad(p)h 7 99 0.64 0.0417 3702.AT2G17420.1	3702.AT3G15360.1	3702.AT3G16950.2	3702.AT3G52880.2	3702.AT4G16155.1	3702.AT5G20500.1	3702.AT5G40370.2 NTRA	TRX-M4	LPD1	MDAR1	AT4G16155	AT5G20500	GRXC2
GO Function GO:0016673 Oxidoreductase activity	acting on a sulfur group of donors	iron-sulfur protein as acceptor 2 2 1.79 0.0417 3702.AT2G04700.1	3702.AT5G04590.1 AT2G04700	SIR
GO Function GO:0031593 Polyubiquitin modification-dependent protein binding 3 12 1.19 0.0417 3702.AT3G02540.1	3702.AT3G13235.1	3702.AT5G38470.1 RAD23C	DDI1	RAD23D
GO Function GO:0033984 indole-3-glycerol-phosphate lyase activity 2 2 1.79 0.0417 3702.AT3G54640.1	3702.AT4G02610.1 TSA2	AT4G02610
GO Function GO:0050308 Sugar-phosphatase activity 3 12 1.19 0.0417 3702.AT1G43670.1	3702.AT2G35840.3	3702.AT3G55800.1 FBP	AT2G35840	SBPASE
GO Function GO:0052745 Inositol phosphate phosphatase activity 3 12 1.19 0.0417 3702.AT1G31190.1	3702.AT5G63980.1	3702.AT5G63990.1 IMPL1	SAL1	AT5G63990
GO Function GO:0070009 Serine-type aminopeptidase activity 2 2 1.79 0.0417 3702.AT4G14570.1	3702.AT4G20850.1 AARE	TPP2
GO Component GO:0005829 Cytosol 251 2567 0.78 1.23e-129 3702.AT1G01050.1	3702.AT1G02880.3	3702.AT1G03330.1	3702.AT1G04410.1	3702.AT1G05350.1	3702.AT1G05620.1	3702.AT1G06570.1	3702.AT1G08360.1	3702.AT1G08780.1	3702.AT1G11840.6	3702.AT1G11910.1	3702.AT1G12000.1	3702.AT1G12050.1	3702.AT1G12310.1	3702.AT1G13440.1	3702.AT1G14320.1	3702.AT1G15340.1	3702.AT1G15930.1	3702.AT1G17880.1	3702.AT1G18080.1	3702.AT1G18210.1	3702.AT1G18540.1	3702.AT1G19570.1	3702.AT1G20010.1	3702.AT1G20450.1	3702.AT1G21720.1	3702.AT1G23190.1	3702.AT1G26570.1	3702.AT1G28350.1	3702.AT1G29880.1	3702.AT1G31190.1	3702.AT1G31340.1	3702.AT1G33120.1	3702.AT1G35580.2	3702.AT1G35720.1	3702.AT1G43670.1	3702.AT1G47200.1	3702.AT1G50110.1	3702.AT1G50480.1	3702.AT1G51360.1	3702.AT1G52570.1	3702.AT1G53310.3	3702.AT1G54100.1	3702.AT1G55090.1	3702.AT1G55490.2	3702.AT1G56450.1	3702.AT1G60710.1	3702.AT1G60730.3	3702.AT1G62820.1	3702.AT1G65960.2
GO Component GO:0005737 Cytoplasm 339 7911 0.42 9.70e-91 3702.AT1G01050.1	3702.AT1G02880.3	3702.AT1G03330.1	3702.AT1G04410.1	3702.AT1G05350.1	3702.AT1G05620.1	3702.AT1G06570.1	3702.AT1G08360.1	3702.AT1G08780.1	3702.AT1G09010.1	3702.AT1G11840.6	3702.AT1G11910.1	3702.AT1G12000.1	3702.AT1G12050.1	3702.AT1G12310.1	3702.AT1G12840.1	3702.AT1G12900.1	3702.AT1G13060.2	3702.AT1G13440.1	3702.AT1G14320.1	3702.AT1G15000.1	3702.AT1G15340.1	3702.AT1G15500.1	3702.AT1G15710.1	3702.AT1G15930.1	3702.AT1G17880.1	3702.AT1G18080.1	3702.AT1G18210.1	3702.AT1G18540.1	3702.AT1G19570.1	3702.AT1G20010.1	3702.AT1G20020.1	3702.AT1G20450.1	3702.AT1G21720.1	3702.AT1G23190.1	3702.AT1G23820.1	3702.AT1G26570.1	3702.AT1G28350.1	3702.AT1G29880.1	3702.AT1G30510.2	3702.AT1G31190.1	3702.AT1G31340.1	3702.AT1G32060.1	3702.AT1G32500.1	3702.AT1G33120.1	3702.AT1G35160.2	3702.AT1G35580.2	3702.AT1G35720.1	3702.AT1G36310.1	3702.AT1G42970.1
GO Component GO:0005622 Intracellular 345 10863 0.29 1.13e-56 3702.AT1G01050.1	3702.AT1G02880.3	3702.AT1G03330.1	3702.AT1G04410.1	3702.AT1G05350.1	3702.AT1G05620.1	3702.AT1G06570.1	3702.AT1G08360.1	3702.AT1G08780.1	3702.AT1G09010.1	3702.AT1G11840.6	3702.AT1G11910.1	3702.AT1G12000.1	3702.AT1G12050.1	3702.AT1G12310.1	3702.AT1G12840.1	3702.AT1G12900.1	3702.AT1G13060.2	3702.AT1G13440.1	3702.AT1G14320.1	3702.AT1G15000.1	3702.AT1G15340.1	3702.AT1G15500.1	3702.AT1G15710.1	3702.AT1G15930.1	3702.AT1G17880.1	3702.AT1G18080.1	3702.AT1G18210.1	3702.AT1G18540.1	3702.AT1G19570.1	3702.AT1G20010.1	3702.AT1G20020.1	3702.AT1G20450.1	3702.AT1G21720.1	3702.AT1G23190.1	3702.AT1G23820.1	3702.AT1G26570.1	3702.AT1G28350.1	3702.AT1G29880.1	3702.AT1G30510.2	3702.AT1G31190.1	3702.AT1G31340.1	3702.AT1G32060.1	3702.AT1G32500.1	3702.AT1G33120.1	3702.AT1G35160.2	3702.AT1G35580.2	3702.AT1G35720.1	3702.AT1G36310.1	3702.AT1G42970.1
GO Component GO:0009536 Plastid 128 2275 0.54 2.83e-33 3702.AT1G04410.1	3702.AT1G11840.6	3702.AT1G12840.1	3702.AT1G12900.1	3702.AT1G13440.1	3702.AT1G15500.1	3702.AT1G15710.1	3702.AT1G18080.1	3702.AT1G19570.1	3702.AT1G20010.1	3702.AT1G20020.1	3702.AT1G23820.1	3702.AT1G29880.1	3702.AT1G30510.2	3702.AT1G31190.1	3702.AT1G32060.1	3702.AT1G32500.1	3702.AT1G33120.1	3702.AT1G35580.2	3702.AT1G35720.1	3702.AT1G42970.1	3702.AT1G44170.2	3702.AT1G50170.1	3702.AT1G50480.1	3702.AT1G52570.1	3702.AT1G53310.3	3702.AT1G55490.2	3702.AT1G60690.1	3702.AT1G67090.1	3702.AT1G67280.1	3702.AT1G69370.1	3702.AT1G70410.2	3702.AT1G74920.1	3702.AT1G78380.1	3702.AT2G01250.1	3702.AT2G04700.1	3702.AT2G09990.1	3702.AT2G14260.1	3702.AT2G15570.2	3702.AT2G19730.3	3702.AT2G21170.1	3702.AT2G21330.1	3702.AT2G28000.1	3702.AT2G30860.1	3702.AT2G30870.1	3702.AT2G35490.1	3702.AT2G36530.1	3702.AT2G37500.1	3702.AT2G40300.1	3702.AT2G42600.1
GO Component GO:0110165 Cellular anatomical entity 349 13776 0.19 3.33e-32 3702.AT1G01050.1	3702.AT1G02880.3	3702.AT1G03330.1	3702.AT1G04410.1	3702.AT1G05350.1	3702.AT1G05620.1	3702.AT1G06570.1	3702.AT1G08360.1	3702.AT1G08780.1	3702.AT1G09010.1	3702.AT1G11840.6	3702.AT1G11910.1	3702.AT1G12000.1	3702.AT1G12050.1	3702.AT1G12310.1	3702.AT1G12840.1	3702.AT1G12900.1	3702.AT1G13060.2	3702.AT1G13440.1	3702.AT1G14320.1	3702.AT1G15000.1	3702.AT1G15340.1	3702.AT1G15500.1	3702.AT1G15710.1	3702.AT1G15930.1	3702.AT1G17880.1	3702.AT1G18080.1	3702.AT1G18210.1	3702.AT1G18540.1	3702.AT1G19570.1	3702.AT1G20010.1	3702.AT1G20020.1	3702.AT1G20450.1	3702.AT1G21720.1	3702.AT1G23190.1	3702.AT1G23820.1	3702.AT1G26570.1	3702.AT1G28350.1	3702.AT1G29880.1	3702.AT1G30510.2	3702.AT1G31190.1	3702.AT1G31340.1	3702.AT1G32060.1	3702.AT1G32500.1	3702.AT1G33120.1	3702.AT1G35160.2	3702.AT1G35580.2	3702.AT1G35720.1	3702.AT1G36310.1	3702.AT1G42970.1
GO Component GO:0022626 Cytosolic ribosome 49 280 1.03 1.23e-30 3702.AT1G08360.1	3702.AT1G14320.1	3702.AT1G15930.1	3702.AT1G18080.1	3702.AT1G18540.1	3702.AT1G33120.1	3702.AT1G55490.2	3702.AT1G56450.1	3702.AT1G67090.1	3702.AT1G74050.1	3702.AT2G01250.1	3702.AT2G05840.1	3702.AT2G09990.1	3702.AT2G19730.3	3702.AT2G21330.1	3702.AT2G27530.1	3702.AT2G28000.1	3702.AT2G34480.1	3702.AT2G39390.1	3702.AT2G40590.1	3702.AT2G44120.2	3702.AT3G02560.2	3702.AT3G04400.1	3702.AT3G07110.2	3702.AT3G09500.1	3702.AT3G10610.1	3702.AT3G12390.1	3702.AT3G13580.3	3702.AT3G16080.1	3702.AT3G18740.1	3702.AT3G22110.1	3702.AT3G51260.1	3702.AT3G53430.1	3702.AT3G53870.1	3702.AT3G60245.1	3702.AT3G61110.1	3702.AT3G62250.1	3702.AT3G62870.1	3702.AT4G00810.1	3702.AT4G15000.1	3702.AT4G18100.1	3702.AT4G20850.1	3702.AT4G29410.1	3702.AT4G34555.1	3702.AT4G36130.1	3702.AT5G03850.1	3702.AT5G13850.1	3702.AT5G27850.1	3702.AT5G67510.1 AT1G08360	SAC52
GO Component GO:0005840 Ribosome 53 370 0.95 1.81e-29 3702.AT1G08360.1	3702.AT1G14320.1	3702.AT1G15930.1	3702.AT1G17880.1	3702.AT1G18080.1	3702.AT1G18540.1	3702.AT1G33120.1	3702.AT1G55490.2	3702.AT1G56450.1	3702.AT1G67090.1	3702.AT1G74050.1	3702.AT2G01250.1	3702.AT2G05840.1	3702.AT2G09990.1	3702.AT2G19730.3	3702.AT2G21330.1	3702.AT2G27530.1	3702.AT2G27720.2	3702.AT2G28000.1	3702.AT2G34480.1	3702.AT2G39390.1	3702.AT2G40590.1	3702.AT2G44120.2	3702.AT3G02560.2	3702.AT3G04400.1	3702.AT3G07110.2	3702.AT3G09500.1	3702.AT3G10610.1	3702.AT3G12390.1	3702.AT3G13580.3	3702.AT3G16080.1	3702.AT3G18740.1	3702.AT3G22110.1	3702.AT3G27850.1	3702.AT3G51260.1	3702.AT3G52580.1	3702.AT3G53430.1	3702.AT3G53870.1	3702.AT3G60245.1	3702.AT3G61110.1	3702.AT3G62250.1	3702.AT3G62870.1	3702.AT4G00810.1	3702.AT4G15000.1	3702.AT4G18100.1	3702.AT4G20850.1	3702.AT4G29410.1	3702.AT4G34555.1	3702.AT4G36130.1	3702.AT5G03850.1
GO Component GO:0043229 Intracellular organelle 277 9831 0.24 2.26e-27 3702.AT1G01050.1	3702.AT1G03330.1	3702.AT1G04410.1	3702.AT1G08360.1	3702.AT1G09010.1	3702.AT1G11840.6	3702.AT1G11910.1	3702.AT1G12310.1	3702.AT1G12840.1	3702.AT1G12900.1	3702.AT1G13060.2	3702.AT1G13440.1	3702.AT1G14320.1	3702.AT1G15000.1	3702.AT1G15340.1	3702.AT1G15500.1	3702.AT1G15710.1	3702.AT1G15930.1	3702.AT1G17880.1	3702.AT1G18080.1	3702.AT1G18210.1	3702.AT1G18540.1	3702.AT1G19570.1	3702.AT1G20010.1	3702.AT1G20020.1	3702.AT1G20450.1	3702.AT1G21720.1	3702.AT1G23190.1	3702.AT1G23820.1	3702.AT1G26570.1	3702.AT1G29880.1	3702.AT1G30510.2	3702.AT1G31190.1	3702.AT1G31340.1	3702.AT1G32060.1	3702.AT1G32500.1	3702.AT1G33120.1	3702.AT1G35160.2	3702.AT1G35580.2	3702.AT1G35720.1	3702.AT1G36310.1	3702.AT1G42970.1	3702.AT1G43670.1	3702.AT1G43890.1	3702.AT1G44170.2	3702.AT1G47200.1	3702.AT1G50170.1	3702.AT1G50480.1	3702.AT1G52160.1	3702.AT1G52570.1
GO Component GO:0009507 Chloroplast 104 1926 0.52 3.84e-25 3702.AT1G04410.1	3702.AT1G11840.6	3702.AT1G12840.1	3702.AT1G12900.1	3702.AT1G13440.1	3702.AT1G15500.1	3702.AT1G15710.1	3702.AT1G18080.1	3702.AT1G19570.1	3702.AT1G20010.1	3702.AT1G20020.1	3702.AT1G23820.1	3702.AT1G29880.1	3702.AT1G30510.2	3702.AT1G31190.1	3702.AT1G32060.1	3702.AT1G32500.1	3702.AT1G33120.1	3702.AT1G35580.2	3702.AT1G35720.1	3702.AT1G42970.1	3702.AT1G50170.1	3702.AT1G50480.1	3702.AT1G52570.1	3702.AT1G53310.3	3702.AT1G55490.2	3702.AT1G60690.1	3702.AT1G67090.1	3702.AT1G67280.1	3702.AT1G69370.1	3702.AT1G70410.2	3702.AT1G74920.1	3702.AT1G78380.1	3702.AT2G01250.1	3702.AT2G04700.1	3702.AT2G09990.1	3702.AT2G14260.1	3702.AT2G15570.2	3702.AT2G19730.3	3702.AT2G21170.1	3702.AT2G21330.1	3702.AT2G28000.1	3702.AT2G30860.1	3702.AT2G30870.1	3702.AT2G35490.1	3702.AT2G36530.1	3702.AT2G37500.1	3702.AT2G40300.1	3702.AT2G42600.1	3702.AT2G43710.1
GO Component GO:0044391 Ribosomal subunit 39 262 0.96 4.33e-22 3702.AT1G08360.1	3702.AT1G14320.1	3702.AT1G15930.1	3702.AT1G18080.1	3702.AT1G18540.1	3702.AT1G33120.1	3702.AT1G74050.1	3702.AT2G01250.1	3702.AT2G09990.1	3702.AT2G19730.3	3702.AT2G27530.1	3702.AT2G34480.1	3702.AT2G39390.1	3702.AT2G40590.1	3702.AT2G44120.2	3702.AT3G02560.2	3702.AT3G04400.1	3702.AT3G07110.2	3702.AT3G09500.1	3702.AT3G10610.1	3702.AT3G13580.3	3702.AT3G16080.1	3702.AT3G18740.1	3702.AT3G27850.1	3702.AT3G53430.1	3702.AT3G53870.1	3702.AT3G60245.1	3702.AT3G61110.1	3702.AT3G62250.1	3702.AT3G62870.1	3702.AT4G00810.1	3702.AT4G15000.1	3702.AT4G18100.1	3702.AT4G29410.1	3702.AT4G34555.1	3702.AT4G36130.1	3702.AT5G03850.1	3702.AT5G27850.1	3702.AT5G67510.1 AT1G08360	SAC52	AT1G15930	ATARCA	AT1G18540	RPL9B	AT1G74050	AT2G01250	AT2G09990	AT2G19730	PGY1	AT2G34480
GO Component GO:0043231 Intracellular membrane-bounded organelle 255 9376 0.23 2.21e-21 3702.AT1G01050.1	3702.AT1G03330.1	3702.AT1G04410.1	3702.AT1G09010.1	3702.AT1G11840.6	3702.AT1G11910.1	3702.AT1G12310.1	3702.AT1G12840.1	3702.AT1G12900.1	3702.AT1G13060.2	3702.AT1G13440.1	3702.AT1G14320.1	3702.AT1G15000.1	3702.AT1G15340.1	3702.AT1G15500.1	3702.AT1G15710.1	3702.AT1G15930.1	3702.AT1G17880.1	3702.AT1G18080.1	3702.AT1G18210.1	3702.AT1G18540.1	3702.AT1G19570.1	3702.AT1G20010.1	3702.AT1G20020.1	3702.AT1G20450.1	3702.AT1G21720.1	3702.AT1G23190.1	3702.AT1G23820.1	3702.AT1G26570.1	3702.AT1G29880.1	3702.AT1G30510.2	3702.AT1G31190.1	3702.AT1G31340.1	3702.AT1G32060.1	3702.AT1G32500.1	3702.AT1G33120.1	3702.AT1G35160.2	3702.AT1G35580.2	3702.AT1G35720.1	3702.AT1G36310.1	3702.AT1G42970.1	3702.AT1G43670.1	3702.AT1G43890.1	3702.AT1G44170.2	3702.AT1G47200.1	3702.AT1G50170.1	3702.AT1G50480.1	3702.AT1G52160.1	3702.AT1G52570.1	3702.AT1G53310.3
GO Component GO:0043227 Membrane-bounded organelle 258 9634 0.22 8.28e-21 3702.AT1G01050.1	3702.AT1G03330.1	3702.AT1G04410.1	3702.AT1G09010.1	3702.AT1G11840.6	3702.AT1G11910.1	3702.AT1G12310.1	3702.AT1G12840.1	3702.AT1G12900.1	3702.AT1G13060.2	3702.AT1G13440.1	3702.AT1G14320.1	3702.AT1G15000.1	3702.AT1G15340.1	3702.AT1G15500.1	3702.AT1G15710.1	3702.AT1G15930.1	3702.AT1G17880.1	3702.AT1G18080.1	3702.AT1G18210.1	3702.AT1G18540.1	3702.AT1G19570.1	3702.AT1G20010.1	3702.AT1G20020.1	3702.AT1G20450.1	3702.AT1G21720.1	3702.AT1G23190.1	3702.AT1G23820.1	3702.AT1G26570.1	3702.AT1G29880.1	3702.AT1G30510.2	3702.AT1G31190.1	3702.AT1G31340.1	3702.AT1G32060.1	3702.AT1G32500.1	3702.AT1G33120.1	3702.AT1G35160.2	3702.AT1G35580.2	3702.AT1G35720.1	3702.AT1G36310.1	3702.AT1G42970.1	3702.AT1G43670.1	3702.AT1G43890.1	3702.AT1G44170.2	3702.AT1G47200.1	3702.AT1G50170.1	3702.AT1G50480.1	3702.AT1G52160.1	3702.AT1G52570.1	3702.AT1G53310.3
GO Component GO:0009570 Chloroplast stroma 56 682 0.7 1.79e-20 3702.AT1G04410.1	3702.AT1G12900.1	3702.AT1G19570.1	3702.AT1G20010.1	3702.AT1G20020.1	3702.AT1G31190.1	3702.AT1G32060.1	3702.AT1G32500.1	3702.AT1G35720.1	3702.AT1G42970.1	3702.AT1G55490.2	3702.AT1G67090.1	3702.AT1G67280.1	3702.AT1G78380.1	3702.AT2G04700.1	3702.AT2G15570.2	3702.AT2G21170.1	3702.AT2G21330.1	3702.AT2G28000.1	3702.AT2G30860.1	3702.AT2G35490.1	3702.AT2G37500.1	3702.AT2G40300.1	3702.AT2G43710.1	3702.AT3G04790.1	3702.AT3G06350.1	3702.AT3G15360.1	3702.AT3G16950.2	3702.AT3G23400.1	3702.AT3G27850.1	3702.AT3G49680.1	3702.AT3G54640.1	3702.AT3G55440.1	3702.AT3G55800.1	3702.AT3G60750.1	3702.AT3G63170.1	3702.AT4G12060.1	3702.AT4G13430.1	3702.AT4G16155.1	3702.AT4G19710.2	3702.AT4G22240.1	3702.AT4G25100.1	3702.AT4G27070.1	3702.AT4G34200.1	3702.AT4G37000.1	3702.AT5G04590.1	3702.AT5G04740.1	3702.AT5G06290.1	3702.AT5G08280.1	3702.AT5G10330.1
GO Component GO:0022625 Cytosolic large ribosomal subunit 27 126 1.12 8.38e-19 3702.AT1G08360.1	3702.AT1G14320.1	3702.AT1G18540.1	3702.AT1G33120.1	3702.AT1G74050.1	3702.AT2G01250.1	3702.AT2G19730.3	3702.AT2G27530.1	3702.AT2G34480.1	3702.AT2G39390.1	3702.AT2G44120.2	3702.AT3G04400.1	3702.AT3G07110.2	3702.AT3G09500.1	3702.AT3G13580.3	3702.AT3G16080.1	3702.AT3G18740.1	3702.AT3G53430.1	3702.AT3G60245.1	3702.AT3G62870.1	3702.AT4G00810.1	3702.AT4G15000.1	3702.AT4G18100.1	3702.AT4G29410.1	3702.AT4G36130.1	3702.AT5G27850.1	3702.AT5G67510.1 AT1G08360	SAC52	AT1G18540	RPL9B	AT1G74050	AT2G01250	AT2G19730	PGY1	AT2G34480	AT2G39390	AT2G44120	emb2171	AT3G07110	AT3G09500	AT3G13580	AT3G16080	AT3G18740	AT3G53430	AT3G60245	AT3G62870	AT4G00810	AT4G15000	AT4G18100	AT4G29410
GO Component GO:0015934 Large ribosomal subunit 28 146 1.07 2.04e-18 3702.AT1G08360.1	3702.AT1G14320.1	3702.AT1G18540.1	3702.AT1G33120.1	3702.AT1G74050.1	3702.AT2G01250.1	3702.AT2G19730.3	3702.AT2G27530.1	3702.AT2G34480.1	3702.AT2G39390.1	3702.AT2G44120.2	3702.AT3G04400.1	3702.AT3G07110.2	3702.AT3G09500.1	3702.AT3G13580.3	3702.AT3G16080.1	3702.AT3G18740.1	3702.AT3G27850.1	3702.AT3G53430.1	3702.AT3G60245.1	3702.AT3G62870.1	3702.AT4G00810.1	3702.AT4G15000.1	3702.AT4G18100.1	3702.AT4G29410.1	3702.AT4G36130.1	3702.AT5G27850.1	3702.AT5G67510.1 AT1G08360	SAC52	AT1G18540	RPL9B	AT1G74050	AT2G01250	AT2G19730	PGY1	AT2G34480	AT2G39390	AT2G44120	emb2171	AT3G07110	AT3G09500	AT3G13580	AT3G16080	AT3G18740	RPL12-C	AT3G53430	AT3G60245	AT3G62870	AT4G00810	AT4G15000
GO Component GO:1990904 Ribonucleoprotein complex 46 509 0.75 2.89e-18 3702.AT1G03330.1	3702.AT1G08360.1	3702.AT1G14320.1	3702.AT1G15930.1	3702.AT1G17880.1	3702.AT1G18080.1	3702.AT1G18540.1	3702.AT1G33120.1	3702.AT1G74050.1	3702.AT1G76860.1	3702.AT2G01250.1	3702.AT2G05840.1	3702.AT2G09990.1	3702.AT2G19730.3	3702.AT2G27530.1	3702.AT2G34480.1	3702.AT2G39390.1	3702.AT2G40590.1	3702.AT2G43810.1	3702.AT2G44120.2	3702.AT3G02560.2	3702.AT3G04400.1	3702.AT3G07110.2	3702.AT3G09500.1	3702.AT3G10610.1	3702.AT3G13580.3	3702.AT3G16080.1	3702.AT3G18740.1	3702.AT3G27850.1	3702.AT3G53430.1	3702.AT3G53870.1	3702.AT3G55620.1	3702.AT3G60245.1	3702.AT3G61110.1	3702.AT3G62250.1	3702.AT3G62870.1	3702.AT4G00810.1	3702.AT4G15000.1	3702.AT4G18100.1	3702.AT4G29410.1	3702.AT4G34555.1	3702.AT4G36130.1	3702.AT5G03850.1	3702.AT5G27850.1	3702.AT5G49510.1	3702.AT5G67510.1 LSM2	AT1G08360	SAC52	AT1G15930	BTF3
GO Component GO:0005839 Proteasome core complex 16 24 1.61 2.53e-17 3702.AT1G13060.2	3702.AT1G21720.1	3702.AT1G56450.1	3702.AT1G77440.1	3702.AT1G79210.2	3702.AT2G05840.1	3702.AT2G27020.1	3702.AT3G22110.1	3702.AT3G26340.1	3702.AT3G27430.2	3702.AT3G51260.1	3702.AT3G60820.1	3702.AT4G14800.2	3702.AT4G31300.2	3702.AT5G35590.1	3702.AT5G42790.1 PBE1	PBC1	PBG1	PBC2	AT1G79210	At2g05840	PAG1	PAC1	AT3G26340	PBB1	PAD1	PBF1	PBD2	PBA1	At5g35590	PAF1
GO Component GO:0005773 Vacuole 57 945 0.57 3.50e-15 3702.AT1G04410.1	3702.AT1G09010.1	3702.AT1G11840.6	3702.AT1G11910.1	3702.AT1G12840.1	3702.AT1G14320.1	3702.AT1G15000.1	3702.AT1G18210.1	3702.AT1G19570.1	3702.AT1G20010.1	3702.AT1G21720.1	3702.AT1G33120.1	3702.AT1G35720.1	3702.AT1G44170.2	3702.AT1G52570.1	3702.AT1G78300.1	3702.AT1G78380.1	3702.AT1G78680.1	3702.AT1G79690.1	3702.AT2G01250.1	3702.AT2G22475.1	3702.AT2G24940.1	3702.AT2G25060.1	3702.AT2G27020.1	3702.AT2G28100.1	3702.AT2G30860.1	3702.AT2G30870.1	3702.AT2G34480.1	3702.AT3G01390.2	3702.AT3G03520.1	3702.AT3G12500.1	3702.AT3G14990.1	3702.AT3G22110.1	3702.AT3G25780.1	3702.AT3G26720.1	3702.AT3G43190.1	3702.AT3G51260.1	3702.AT3G55260.1	3702.AT3G55440.1	3702.AT3G56310.1	3702.AT3G62870.1	3702.AT4G12910.1	3702.AT4G14570.1	3702.AT4G16660.1	3702.AT4G20850.1	3702.AT4G35830.1	3702.AT4G36130.1	3702.AT4G38510.5	3702.AT5G06730.1	3702.AT5G10560.1
GO Component GO:0032991 Protein-containing complex 91 2226 0.4 2.24e-14 3702.AT1G03330.1	3702.AT1G08360.1	3702.AT1G08780.1	3702.AT1G12840.1	3702.AT1G13060.2	3702.AT1G14320.1	3702.AT1G15930.1	3702.AT1G17880.1	3702.AT1G18080.1	3702.AT1G18540.1	3702.AT1G20010.1	3702.AT1G20020.1	3702.AT1G21720.1	3702.AT1G33120.1	3702.AT1G56450.1	3702.AT1G74050.1	3702.AT1G76860.1	3702.AT1G77440.1	3702.AT1G79210.2	3702.AT2G01250.1	3702.AT2G05840.1	3702.AT2G09990.1	3702.AT2G16780.1	3702.AT2G19730.3	3702.AT2G20760.1	3702.AT2G26060.1	3702.AT2G27020.1	3702.AT2G27530.1	3702.AT2G29560.1	3702.AT2G34480.1	3702.AT2G36530.1	3702.AT2G39390.1	3702.AT2G40590.1	3702.AT2G42910.1	3702.AT2G43810.1	3702.AT2G44120.2	3702.AT3G01390.2	3702.AT3G02560.2	3702.AT3G04400.1	3702.AT3G06540.1	3702.AT3G07110.2	3702.AT3G09500.1	3702.AT3G10610.1	3702.AT3G12390.1	3702.AT3G13580.3	3702.AT3G16080.1	3702.AT3G18060.1	3702.AT3G18740.1	3702.AT3G22110.1	3702.AT3G26340.1
GO Component GO:0048046 Apoplast 37 424 0.73 3.31e-14 3702.AT1G04410.1	3702.AT1G12900.1	3702.AT1G19570.1	3702.AT1G20020.1	3702.AT1G32060.1	3702.AT1G35720.1	3702.AT1G42970.1	3702.AT1G47710.1	3702.AT1G50480.1	3702.AT1G53310.3	3702.AT1G55490.2	3702.AT1G67090.1	3702.AT2G21170.1	3702.AT2G21330.1	3702.AT2G27020.1	3702.AT2G28000.1	3702.AT2G28100.1	3702.AT2G30860.1	3702.AT2G30870.1	3702.AT2G36530.1	3702.AT2G41530.1	3702.AT2G42600.1	3702.AT3G03780.1	3702.AT3G09820.1	3702.AT3G14940.1	3702.AT3G55440.1	3702.AT3G55800.1	3702.AT3G56310.1	3702.AT4G35830.1	3702.AT5G04590.1	3702.AT5G05340.1	3702.AT5G06290.1	3702.AT5G08280.1	3702.AT5G55730.1	3702.AT5G61410.1	3702.AT5G64120.1	3702.AT5G67360.1 c-NAD-MDH1	GAPA-2	DHAR1	FNR2	PRK	ANNAT1	GAPB	SERPIN1	THFS	PPC1	CPN60B	RBCS1A	TIM	FBA1
GO Component GO:0000502 Proteasome complex 17 60 1.24 1.48e-13 3702.AT1G13060.2	3702.AT1G21720.1	3702.AT1G56450.1	3702.AT1G77440.1	3702.AT1G79210.2	3702.AT2G05840.1	3702.AT2G27020.1	3702.AT3G22110.1	3702.AT3G26340.1	3702.AT3G27430.2	3702.AT3G51260.1	3702.AT3G53970.1	3702.AT3G60820.1	3702.AT4G14800.2	3702.AT4G31300.2	3702.AT5G35590.1	3702.AT5G42790.1 PBE1	PBC1	PBG1	PBC2	AT1G79210	At2g05840	PAG1	PAC1	AT3G26340	PBB1	PAD1	AT3G53970	PBF1	PBD2	PBA1	At5g35590	PAF1
GO Component GO:0005844 Polysome 20 101 1.09 1.93e-13 3702.AT1G08360.1	3702.AT1G14320.1	3702.AT1G15930.1	3702.AT1G17880.1	3702.AT1G18080.1	3702.AT2G01250.1	3702.AT2G05840.1	3702.AT2G09990.1	3702.AT2G27530.1	3702.AT2G34480.1	3702.AT3G13580.3	3702.AT3G18740.1	3702.AT3G53870.1	3702.AT3G61110.1	3702.AT3G62870.1	3702.AT4G15000.1	3702.AT4G18100.1	3702.AT4G36130.1	3702.AT5G49510.1	3702.AT5G67510.1 AT1G08360	SAC52	AT1G15930	BTF3	ATARCA	AT2G01250	At2g05840	AT2G09990	PGY1	AT2G34480	AT3G13580	AT3G18740	AT3G53870	RS27A	AT3G62870	AT4G15000	AT4G18100	AT4G36130	PFD3	AT5G67510
GO Component GO:0043232 Intracellular non-membrane-bounded organelle 67 1407 0.47 2.95e-13 3702.AT1G03330.1	3702.AT1G08360.1	3702.AT1G13440.1	3702.AT1G14320.1	3702.AT1G15930.1	3702.AT1G17880.1	3702.AT1G18080.1	3702.AT1G18540.1	3702.AT1G20010.1	3702.AT1G33120.1	3702.AT1G55490.2	3702.AT1G56450.1	3702.AT1G67090.1	3702.AT1G74050.1	3702.AT1G76860.1	3702.AT2G01250.1	3702.AT2G05840.1	3702.AT2G09990.1	3702.AT2G19730.3	3702.AT2G21330.1	3702.AT2G27040.2	3702.AT2G27530.1	3702.AT2G27720.2	3702.AT2G28000.1	3702.AT2G30410.2	3702.AT2G34480.1	3702.AT2G39390.1	3702.AT2G40590.1	3702.AT2G43810.1	3702.AT2G44120.2	3702.AT3G02560.2	3702.AT3G04400.1	3702.AT3G07110.2	3702.AT3G09500.1	3702.AT3G10610.1	3702.AT3G12390.1	3702.AT3G13580.3	3702.AT3G16080.1	3702.AT3G16950.2	3702.AT3G18060.1	3702.AT3G18740.1	3702.AT3G22110.1	3702.AT3G27850.1	3702.AT3G51260.1	3702.AT3G52580.1	3702.AT3G53430.1	3702.AT3G53870.1	3702.AT3G55620.1	3702.AT3G60245.1	3702.AT3G61110.1
GO Component GO:0042788 Polysomal ribosome 19 94 1.1 5.98e-13 3702.AT1G08360.1	3702.AT1G14320.1	3702.AT1G15930.1	3702.AT1G17880.1	3702.AT1G18080.1	3702.AT2G01250.1	3702.AT2G05840.1	3702.AT2G09990.1	3702.AT2G27530.1	3702.AT2G34480.1	3702.AT3G13580.3	3702.AT3G18740.1	3702.AT3G53870.1	3702.AT3G61110.1	3702.AT3G62870.1	3702.AT4G15000.1	3702.AT4G18100.1	3702.AT4G36130.1	3702.AT5G67510.1 AT1G08360	SAC52	AT1G15930	BTF3	ATARCA	AT2G01250	At2g05840	AT2G09990	PGY1	AT2G34480	AT3G13580	AT3G18740	AT3G53870	RS27A	AT3G62870	AT4G15000	AT4G18100	AT4G36130	AT5G67510
GO Component GO:0009526 Plastid envelope 40 603 0.61 7.46e-12 3702.AT1G11840.6	3702.AT1G12900.1	3702.AT1G15500.1	3702.AT1G23820.1	3702.AT1G32060.1	3702.AT1G33120.1	3702.AT1G42970.1	3702.AT1G52570.1	3702.AT1G55490.2	3702.AT1G60690.1	3702.AT1G67090.1	3702.AT1G67280.1	3702.AT1G70410.2	3702.AT2G04700.1	3702.AT2G21170.1	3702.AT2G21330.1	3702.AT2G28000.1	3702.AT2G40300.1	3702.AT3G03780.1	3702.AT3G04790.1	3702.AT3G15360.1	3702.AT3G16950.2	3702.AT3G23400.1	3702.AT3G55800.1	3702.AT3G60750.1	3702.AT3G63170.1	3702.AT4G12060.1	3702.AT4G16155.1	3702.AT4G25100.1	3702.AT4G27070.1	3702.AT4G37000.1	3702.AT5G04590.1	3702.AT5G06290.1	3702.AT5G08280.1	3702.AT5G12470.1	3702.AT5G24650.1	3702.AT5G42960.1	3702.AT5G60600.1	3702.AT5G61410.1	3702.AT5G63310.1 GLX1	GAPA-2	ATNTT2	SPDS1	PRK	RPL9B	GAPB	PLDALPHA2	CPN60B	AT1G60690	RBCS1A
GO Component GO:0009506 Plasmodesma 43 741 0.55 6.05e-11 3702.AT1G04410.1	3702.AT1G08360.1	3702.AT1G11910.1	3702.AT1G13440.1	3702.AT1G18540.1	3702.AT1G20450.1	3702.AT1G33120.1	3702.AT1G35720.1	3702.AT1G44170.2	3702.AT1G74050.1	3702.AT2G09990.1	3702.AT2G16060.1	3702.AT2G19730.3	3702.AT2G25060.1	3702.AT2G29450.1	3702.AT2G30860.1	3702.AT2G35840.3	3702.AT2G36530.1	3702.AT2G42600.1	3702.AT2G42910.1	3702.AT2G45820.1	3702.AT3G03520.1	3702.AT3G03780.1	3702.AT3G09500.1	3702.AT3G09820.1	3702.AT3G12390.1	3702.AT3G14990.1	3702.AT3G18740.1	3702.AT3G53870.1	3702.AT3G55440.1	3702.AT3G61110.1	3702.AT4G29410.1	3702.AT4G35830.1	3702.AT5G13850.1	3702.AT5G16510.2	3702.AT5G19550.1	3702.AT5G20830.1	3702.AT5G27850.1	3702.AT5G37830.1	3702.AT5G38480.1	3702.AT5G42980.1	3702.AT5G51970.1	3702.AT5G64120.1 c-NAD-MDH1	AT1G08360	APA1	GAPC2	AT1G18540	ERD10	RPL9B	ANNAT1
GO Component GO:0009941 Chloroplast envelope 38 591 0.6 6.11e-11 3702.AT1G11840.6	3702.AT1G12900.1	3702.AT1G15500.1	3702.AT1G23820.1	3702.AT1G32060.1	3702.AT1G33120.1	3702.AT1G42970.1	3702.AT1G52570.1	3702.AT1G55490.2	3702.AT1G60690.1	3702.AT1G67090.1	3702.AT1G70410.2	3702.AT2G04700.1	3702.AT2G21170.1	3702.AT2G21330.1	3702.AT2G28000.1	3702.AT2G40300.1	3702.AT3G03780.1	3702.AT3G04790.1	3702.AT3G15360.1	3702.AT3G16950.2	3702.AT3G23400.1	3702.AT3G55800.1	3702.AT3G60750.1	3702.AT3G63170.1	3702.AT4G12060.1	3702.AT4G16155.1	3702.AT4G25100.1	3702.AT4G27070.1	3702.AT4G37000.1	3702.AT5G04590.1	3702.AT5G08280.1	3702.AT5G12470.1	3702.AT5G24650.1	3702.AT5G42960.1	3702.AT5G60600.1	3702.AT5G61410.1	3702.AT5G63310.1 GLX1	GAPA-2	ATNTT2	SPDS1	PRK	RPL9B	GAPB	PLDALPHA2	CPN60B	AT1G60690	RBCS1A	BCA4	AT2G04700
GO Component GO:0019774 Proteasome core complex	beta-subunit complex 9 11 1.7 1.95e-10 3702.AT1G13060.2	3702.AT1G21720.1	3702.AT1G56450.1	3702.AT1G77440.1	3702.AT3G26340.1	3702.AT3G27430.2	3702.AT3G60820.1	3702.AT4G14800.2	3702.AT4G31300.2 PBE1	PBC1	PBG1	PBC2	AT3G26340	PBB1	PBF1	PBD2	PBA1
GO Component GO:0099503 Secretory vesicle 18 131 0.93 6.99e-10 3702.AT1G11840.6	3702.AT1G11910.1	3702.AT1G21720.1	3702.AT2G14260.1	3702.AT2G25060.1	3702.AT2G28100.1	3702.AT3G10850.1	3702.AT3G12500.1	3702.AT3G26720.1	3702.AT3G29360.1	3702.AT3G55260.1	3702.AT3G56310.1	3702.AT4G16660.1	3702.AT4G34180.1	3702.AT5G20500.1	3702.AT5G55730.1	3702.AT5G64120.1	3702.AT5G67360.1 GLX1	APA1	PBC1	PIP	ENODL14	FUC1	GLY2	HCHIB	AT3G26720	UGD2	HEXO1	AT3G56310	AT4G16660	AT4G34180	AT5G20500	FLA1	AT5G64120	ARA12
GO Component GO:0071944 Cell periphery 95 3265 0.25 3.25e-07 3702.AT1G04410.1	3702.AT1G08360.1	3702.AT1G11840.6	3702.AT1G12000.1	3702.AT1G12310.1	3702.AT1G12840.1	3702.AT1G13440.1	3702.AT1G18210.1	3702.AT1G18540.1	3702.AT1G19570.1	3702.AT1G20010.1	3702.AT1G23190.1	3702.AT1G31340.1	3702.AT1G33120.1	3702.AT1G35580.2	3702.AT1G35720.1	3702.AT1G43890.1	3702.AT1G47200.1	3702.AT1G50480.1	3702.AT1G52570.1	3702.AT1G55490.2	3702.AT1G60690.1	3702.AT1G70310.1	3702.AT1G70410.2	3702.AT1G74050.1	3702.AT1G74920.1	3702.AT1G78300.1	3702.AT1G78380.1	3702.AT1G78680.1	3702.AT2G01250.1	3702.AT2G02990.1	3702.AT2G09990.1	3702.AT2G16060.1	3702.AT2G19730.3	3702.AT2G20760.1	3702.AT2G25060.1	3702.AT2G29450.1	3702.AT2G30860.1	3702.AT2G30870.1	3702.AT2G34480.1	3702.AT2G36530.1	3702.AT2G42600.1	3702.AT2G42910.1	3702.AT2G45820.1	3702.AT3G01390.2	3702.AT3G01520.1	3702.AT3G03780.1	3702.AT3G09820.1	3702.AT3G14990.1	3702.AT3G15360.1
GO Component GO:0019773 Proteasome core complex	alpha-subunit complex 7 13 1.52 3.31e-07 3702.AT1G79210.2	3702.AT2G05840.1	3702.AT2G27020.1	3702.AT3G22110.1	3702.AT3G51260.1	3702.AT5G35590.1	3702.AT5G42790.1 AT1G79210	At2g05840	PAG1	PAC1	PAD1	At5g35590	PAF1
GO Component GO:0005576 Extracellular region 58 1605 0.35 3.65e-07 3702.AT1G04410.1	3702.AT1G08360.1	3702.AT1G11840.6	3702.AT1G11910.1	3702.AT1G12050.1	3702.AT1G12310.1	3702.AT1G12840.1	3702.AT1G12900.1	3702.AT1G13440.1	3702.AT1G14320.1	3702.AT1G15000.1	3702.AT1G19570.1	3702.AT1G20020.1	3702.AT1G32060.1	3702.AT1G35720.1	3702.AT1G42970.1	3702.AT1G47710.1	3702.AT1G50480.1	3702.AT1G53310.3	3702.AT1G55490.2	3702.AT1G67090.1	3702.AT1G72260.1	3702.AT1G78680.1	3702.AT2G02990.1	3702.AT2G21170.1	3702.AT2G21330.1	3702.AT2G22970.3	3702.AT2G27020.1	3702.AT2G27190.1	3702.AT2G28000.1	3702.AT2G28100.1	3702.AT2G30860.1	3702.AT2G30870.1	3702.AT2G36530.1	3702.AT2G41530.1	3702.AT2G42600.1	3702.AT3G03780.1	3702.AT3G04400.1	3702.AT3G09820.1	3702.AT3G12490.2	3702.AT3G14940.1	3702.AT3G55440.1	3702.AT3G55800.1	3702.AT3G56310.1	3702.AT4G12910.1	3702.AT4G20430.1	3702.AT4G34180.1	3702.AT4G35830.1	3702.AT5G04590.1	3702.AT5G05340.1
GO Component GO:0031967 Organelle envelope 43 1017 0.42 4.77e-07 3702.AT1G11840.6	3702.AT1G12900.1	3702.AT1G15500.1	3702.AT1G23820.1	3702.AT1G32060.1	3702.AT1G33120.1	3702.AT1G42970.1	3702.AT1G47200.1	3702.AT1G52570.1	3702.AT1G55490.2	3702.AT1G60690.1	3702.AT1G67090.1	3702.AT1G67280.1	3702.AT1G70410.2	3702.AT2G04700.1	3702.AT2G21170.1	3702.AT2G21330.1	3702.AT2G28000.1	3702.AT2G36530.1	3702.AT2G40300.1	3702.AT3G03780.1	3702.AT3G04790.1	3702.AT3G15360.1	3702.AT3G16950.2	3702.AT3G23400.1	3702.AT3G55800.1	3702.AT3G60750.1	3702.AT3G63170.1	3702.AT4G12060.1	3702.AT4G16155.1	3702.AT4G25100.1	3702.AT4G27070.1	3702.AT4G37000.1	3702.AT5G04590.1	3702.AT5G06290.1	3702.AT5G08280.1	3702.AT5G12470.1	3702.AT5G24650.1	3702.AT5G42960.1	3702.AT5G51970.1	3702.AT5G60600.1	3702.AT5G61410.1	3702.AT5G63310.1 GLX1	GAPA-2	ATNTT2	SPDS1	PRK	RPL9B	GAPB	WPP2
GO Component GO:0005886 Plasma membrane 81 2757 0.26 2.92e-06 3702.AT1G04410.1	3702.AT1G08360.1	3702.AT1G11840.6	3702.AT1G12310.1	3702.AT1G12840.1	3702.AT1G13440.1	3702.AT1G18210.1	3702.AT1G18540.1	3702.AT1G19570.1	3702.AT1G20010.1	3702.AT1G23190.1	3702.AT1G31340.1	3702.AT1G33120.1	3702.AT1G35580.2	3702.AT1G35720.1	3702.AT1G43890.1	3702.AT1G47200.1	3702.AT1G50480.1	3702.AT1G52570.1	3702.AT1G55490.2	3702.AT1G60690.1	3702.AT1G70310.1	3702.AT1G70410.2	3702.AT1G74050.1	3702.AT1G78300.1	3702.AT1G78380.1	3702.AT2G01250.1	3702.AT2G02990.1	3702.AT2G16060.1	3702.AT2G19730.3	3702.AT2G20760.1	3702.AT2G25060.1	3702.AT2G29450.1	3702.AT2G30860.1	3702.AT2G30870.1	3702.AT2G34480.1	3702.AT2G36530.1	3702.AT2G42600.1	3702.AT2G42910.1	3702.AT2G45820.1	3702.AT3G01390.2	3702.AT3G01520.1	3702.AT3G03780.1	3702.AT3G09820.1	3702.AT3G14990.1	3702.AT3G17210.1	3702.AT3G18740.1	3702.AT3G23400.1	3702.AT3G25780.1	3702.AT3G43190.1
GO Component GO:0005774 Vacuolar membrane 28 558 0.49 5.66e-06 3702.AT1G04410.1	3702.AT1G12840.1	3702.AT1G14320.1	3702.AT1G20010.1	3702.AT1G21720.1	3702.AT1G33120.1	3702.AT1G35720.1	3702.AT1G78300.1	3702.AT1G78380.1	3702.AT2G01250.1	3702.AT2G27020.1	3702.AT2G34480.1	3702.AT3G01390.2	3702.AT3G12500.1	3702.AT3G14990.1	3702.AT3G25780.1	3702.AT3G26720.1	3702.AT3G51260.1	3702.AT3G55440.1	3702.AT3G62870.1	3702.AT4G16660.1	3702.AT4G20850.1	3702.AT4G38510.5	3702.AT5G06730.1	3702.AT5G10560.1	3702.AT5G19550.1	3702.AT5G24650.1	3702.AT5G35590.1 c-NAD-MDH1	DET3	SAC52	TUB5	PBC1	RPL9B	ANNAT1	GF14	GSTU19	AT2G01250	PAG1	AT2G34480	VMA10	HCHIB	DJ1A	AOC3	AT3G26720	PAD1	TPI	AT3G62870	AT4G16660	TPP2	VAB2
GO Component GO:0005739 Mitochondrion 51 1456 0.33 6.42e-06 3702.AT1G13440.1	3702.AT1G19570.1	3702.AT1G29880.1	3702.AT1G35720.1	3702.AT1G52160.1	3702.AT1G67090.1	3702.AT1G67280.1	3702.AT1G69800.2	3702.AT1G70310.1	3702.AT1G70410.2	3702.AT1G71170.1	3702.AT1G74050.1	3702.AT1G74920.1	3702.AT1G76550.1	3702.AT1G76860.1	3702.AT1G77440.1	3702.AT1G78300.1	3702.AT1G78380.1	3702.AT1G79210.2	3702.AT1G79690.1	3702.AT1G80360.1	3702.AT1G80460.1	3702.AT2G01250.1	3702.AT2G05840.1	3702.AT2G09990.1	3702.AT2G14260.1	3702.AT2G17420.1	3702.AT2G19730.3	3702.AT2G20760.1	3702.AT2G21170.1	3702.AT2G21330.1	3702.AT2G28000.1	3702.AT2G36530.1	3702.AT2G40300.1	3702.AT3G22110.1	3702.AT3G55440.1	3702.AT3G63170.1	3702.AT4G22240.1	3702.AT4G25100.1	3702.AT4G29120.1	3702.AT4G34200.1	3702.AT4G35830.1	3702.AT4G37000.1	3702.AT5G12470.1	3702.AT5G16050.1	3702.AT5G19150.1	3702.AT5G24650.1	3702.AT5G38480.1	3702.AT5G42960.1	3702.AT5G42980.1
GO Component GO:0022627 Cytosolic small ribosomal subunit 11 90 0.88 1.14e-05 3702.AT1G15930.1	3702.AT1G18080.1	3702.AT2G09990.1	3702.AT2G40590.1	3702.AT3G02560.2	3702.AT3G10610.1	3702.AT3G53870.1	3702.AT3G61110.1	3702.AT3G62250.1	3702.AT4G34555.1	3702.AT5G03850.1 AT1G15930	ATARCA	AT2G09990	AT2G40590	AT3G02560	AT3G10610	AT3G53870	RS27A	UBQ5	AT4G34555	AT3G10090
GO Component GO:0005854 Nascent polypeptide-associated complex 5 7 1.64 1.24e-05 3702.AT1G17880.1	3702.AT3G12390.1	3702.AT3G49470.1	3702.AT4G10480.1	3702.AT5G13850.1 BTF3	AT3G12390	NACA2	AT4G10480	NACA3
GO Component GO:0005618 Cell wall 29 633 0.45 1.87e-05 3702.AT1G12000.1	3702.AT1G13440.1	3702.AT1G20010.1	3702.AT1G35720.1	3702.AT1G74920.1	3702.AT1G78680.1	3702.AT2G01250.1	3702.AT2G02990.1	3702.AT2G09990.1	3702.AT2G16060.1	3702.AT2G19730.3	3702.AT2G30870.1	3702.AT3G15360.1	3702.AT3G55440.1	3702.AT3G56310.1	3702.AT3G61110.1	3702.AT4G34180.1	3702.AT5G03850.1	3702.AT5G05340.1	3702.AT5G10560.1	3702.AT5G14800.1	3702.AT5G15490.1	3702.AT5G16050.1	3702.AT5G19550.1	3702.AT5G38480.1	3702.AT5G42980.1	3702.AT5G55730.1	3702.AT5G64120.1	3702.AT5G67360.1 AT1G12000	GAPC2	TUB5	ANNAT1	ALDH10A8	GGH2	AT2G01250	RNS1	AT2G09990	HB1	AT2G19730	GSTF10	TRX-M4	TPI	AT3G56310	RS27A	AT4G34180	AT3G10090	PRX52	AT5G10560	P5CR	UGD3
GO Component GO:0005634 Nucleus 114 4669 0.18 5.64e-05 3702.AT1G01050.1	3702.AT1G03330.1	3702.AT1G04410.1	3702.AT1G12310.1	3702.AT1G13060.2	3702.AT1G13440.1	3702.AT1G14320.1	3702.AT1G15340.1	3702.AT1G15930.1	3702.AT1G17880.1	3702.AT1G18080.1	3702.AT1G18210.1	3702.AT1G18540.1	3702.AT1G19570.1	3702.AT1G20010.1	3702.AT1G20020.1	3702.AT1G20450.1	3702.AT1G21720.1	3702.AT1G23190.1	3702.AT1G26570.1	3702.AT1G29880.1	3702.AT1G31340.1	3702.AT1G32060.1	3702.AT1G33120.1	3702.AT1G35160.2	3702.AT1G35580.2	3702.AT1G35720.1	3702.AT1G36310.1	3702.AT1G42970.1	3702.AT1G43670.1	3702.AT1G43890.1	3702.AT1G44170.2	3702.AT1G47200.1	3702.AT1G50480.1	3702.AT1G52160.1	3702.AT1G52570.1	3702.AT1G53310.3	3702.AT1G55490.2	3702.AT1G56450.1	3702.AT1G60710.1	3702.AT1G60730.3	3702.AT1G62820.1	3702.AT1G65960.2	3702.AT1G76860.1	3702.AT1G77440.1	3702.AT1G77710.1	3702.AT1G78300.1	3702.AT1G79210.2	3702.AT2G03800.1	3702.AT2G05840.1
GO Component GO:0010319 Stromule 7 34 1.1 5.64e-05 3702.AT1G32060.1	3702.AT1G42970.1	3702.AT1G55490.2	3702.AT1G67280.1	3702.AT5G04590.1	3702.AT5G06290.1	3702.AT5G61410.1 PRK	GAPB	CPN60B	AT1G67280	SIR	At5g06290	RPE
GO Component GO:1902494 Catalytic complex 31 776 0.39 0.00011 3702.AT1G03330.1	3702.AT1G13060.2	3702.AT1G21720.1	3702.AT1G56450.1	3702.AT1G76860.1	3702.AT1G77440.1	3702.AT1G79210.2	3702.AT2G05840.1	3702.AT2G16780.1	3702.AT2G27020.1	3702.AT2G29560.1	3702.AT2G36530.1	3702.AT2G42910.1	3702.AT3G06540.1	3702.AT3G18060.1	3702.AT3G22110.1	3702.AT3G26340.1	3702.AT3G27430.2	3702.AT3G51260.1	3702.AT3G53970.1	3702.AT3G59380.1	3702.AT3G60820.1	3702.AT4G05420.1	3702.AT4G14800.2	3702.AT4G27490.1	3702.AT4G31300.2	3702.AT5G14530.1	3702.AT5G35590.1	3702.AT5G42790.1	3702.AT5G49980.1	3702.AT5G59160.2 LSM2	PBE1	PBC1	PBG1	LSM3B	PBC2	AT1G79210	At2g05840	MSI2	PAG1	ENOC	LOS2	AT2G42910	REP	AT3G18060	PAC1	AT3G26340	PBB1	PAD1	AT3G53970
GO Component GO:0098805 Whole membrane 32 881 0.35 0.00046 3702.AT1G04410.1	3702.AT1G12840.1	3702.AT1G14320.1	3702.AT1G20010.1	3702.AT1G21720.1	3702.AT1G33120.1	3702.AT1G35720.1	3702.AT1G47200.1	3702.AT1G78300.1	3702.AT1G78380.1	3702.AT2G01250.1	3702.AT2G20760.1	3702.AT2G27020.1	3702.AT2G34480.1	3702.AT2G36530.1	3702.AT3G01390.2	3702.AT3G12500.1	3702.AT3G14990.1	3702.AT3G25780.1	3702.AT3G26720.1	3702.AT3G51260.1	3702.AT3G55440.1	3702.AT3G62870.1	3702.AT4G16660.1	3702.AT4G20850.1	3702.AT4G38510.5	3702.AT5G06730.1	3702.AT5G10560.1	3702.AT5G19550.1	3702.AT5G24650.1	3702.AT5G35590.1	3702.AT5G42960.1 c-NAD-MDH1	DET3	SAC52	TUB5	PBC1	RPL9B	ANNAT1	WPP2	GF14	GSTU19	AT2G01250	AT2G20760	PAG1	AT2G34480	LOS2	VMA10	HCHIB	DJ1A	AOC3
GO Component GO:0009579 Thylakoid 22 494 0.44 0.00049 3702.AT1G20020.1	3702.AT1G32060.1	3702.AT1G35720.1	3702.AT1G42970.1	3702.AT1G67090.1	3702.AT1G67280.1	3702.AT2G21170.1	3702.AT2G21330.1	3702.AT2G28000.1	3702.AT2G30860.1	3702.AT2G35490.1	3702.AT3G04790.1	3702.AT3G15360.1	3702.AT3G23400.1	3702.AT3G27850.1	3702.AT3G55800.1	3702.AT4G22240.1	3702.AT4G25100.1	3702.AT4G37000.1	3702.AT5G04740.1	3702.AT5G61410.1	3702.AT5G63310.1 FNR2	PRK	ANNAT1	GAPB	RBCS1A	AT1G67280	TIM	FBA1	CPN60A	GSTF9	AT2G35490	EMB3119	TRX-M4	FIB4	RPL12-C	SBPASE	AT4G22240	FSD1	ACD2	ACR12	RPE	NDPK2
GO Component GO:0005777 Peroxisome 14 257 0.53 0.0018 3702.AT1G11840.6	3702.AT1G13440.1	3702.AT1G19570.1	3702.AT2G27020.1	3702.AT2G27530.1	3702.AT2G28000.1	3702.AT2G29450.1	3702.AT2G29560.1	3702.AT2G30410.2	3702.AT2G30860.1	3702.AT2G30870.1	3702.AT3G52880.2	3702.AT4G12910.1	3702.AT5G48230.2 GLX1	GAPC2	DHAR1	PAG1	PGY1	CPN60A	GSTU5	ENOC	KIS	GSTF9	GSTF10	MDAR1	scpl20	ACAT2
GO Component GO:0016272 Prefoldin complex 3 4 1.67 0.0019 3702.AT1G08780.1	3702.AT5G23290.1	3702.AT5G49510.1 AIP3	PFD5	PFD3
GO Component GO:0005688 U6 snRNP 3 8 1.36 0.0082 3702.AT1G03330.1	3702.AT1G76860.1	3702.AT2G43810.1 LSM2	LSM3B	LSM6B
GO Component GO:0046540 U4/U6 x U5 tri-snRNP complex 3 14 1.12 0.0311 3702.AT1G03330.1	3702.AT1G76860.1	3702.AT2G43810.1 LSM2	LSM3B	LSM6B
GO Component GO:0000015 Phosphopyruvate hydratase complex 2 3 1.61 0.0324 3702.AT2G29560.1	3702.AT2G36530.1 ENOC	LOS2
GO Component GO:0031410 Cytoplasmic vesicle 22 687 0.3 0.0324 3702.AT1G11840.6	3702.AT1G11910.1	3702.AT1G21720.1	3702.AT1G29880.1	3702.AT1G52570.1	3702.AT2G14260.1	3702.AT2G20760.1	3702.AT2G25060.1	3702.AT2G28100.1	3702.AT3G10850.1	3702.AT3G12500.1	3702.AT3G26720.1	3702.AT3G29360.1	3702.AT3G55260.1	3702.AT3G56310.1	3702.AT4G16660.1	3702.AT4G34180.1	3702.AT5G20500.1	3702.AT5G55730.1	3702.AT5G64120.1	3702.AT5G66120.2	3702.AT5G67360.1 GLX1	APA1	PBC1	AT1G29880	PLDALPHA2	PIP	AT2G20760	ENODL14	FUC1	GLY2	HCHIB	AT3G26720	UGD2	HEXO1	AT3G56310	AT4G16660	AT4G34180	AT5G20500	FLA1	AT5G64120	AT5G66120	ARA12
STRING clusters CL:1091 Ribosomal subunit 35 198 1.04 4.61e-20 3702.AT1G14320.1	3702.AT1G15930.1	3702.AT1G18080.1	3702.AT1G18540.1	3702.AT1G33120.1	3702.AT1G74050.1	3702.AT2G01250.1	3702.AT2G09990.1	3702.AT2G19730.3	3702.AT2G27530.1	3702.AT2G34480.1	3702.AT2G39390.1	3702.AT2G40590.1	3702.AT2G44120.2	3702.AT3G02560.2	3702.AT3G07110.2	3702.AT3G10610.1	3702.AT3G13580.3	3702.AT3G16080.1	3702.AT3G18740.1	3702.AT3G52580.1	3702.AT3G53430.1	3702.AT3G53870.1	3702.AT3G60245.1	3702.AT3G61110.1	3702.AT3G62250.1	3702.AT3G62870.1	3702.AT4G00810.1	3702.AT4G15000.1	3702.AT4G18100.1	3702.AT4G29410.1	3702.AT4G34555.1	3702.AT5G03850.1	3702.AT5G27850.1	3702.AT5G67510.1 SAC52	AT1G15930	ATARCA	AT1G18540	RPL9B	AT1G74050	AT2G01250	AT2G09990	AT2G19730	PGY1	AT2G34480	AT2G39390	AT2G40590	AT2G44120	AT3G02560	AT3G07110
STRING clusters CL:9681 Carbon metabolism	and branched-chain amino acid catabolic process 34 200 1.02 3.11e-19 3702.AT1G04410.1	3702.AT1G12000.1	3702.AT1G12900.1	3702.AT1G13440.1	3702.AT1G23190.1	3702.AT1G42970.1	3702.AT1G43670.1	3702.AT1G53310.3	3702.AT1G70730.3	3702.AT1G76550.1	3702.AT2G21170.1	3702.AT2G21330.1	3702.AT2G29560.1	3702.AT2G36530.1	3702.AT2G42600.1	3702.AT2G42910.1	3702.AT3G04790.1	3702.AT3G14940.1	3702.AT3G16950.2	3702.AT3G55440.1	3702.AT3G55800.1	3702.AT3G60750.1	3702.AT4G04040.1	3702.AT4G16155.1	3702.AT4G17260.1	3702.AT4G32840.1	3702.AT4G35830.1	3702.AT5G08570.1	3702.AT5G19550.1	3702.AT5G42740.1	3702.AT5G56350.1	3702.AT5G56630.1	3702.AT5G61410.1	3702.AT5G63680.1 c-NAD-MDH1	AT1G12000	GAPA-2	GAPC2	PGM3	GAPB	FBP	PPC1	PGM2	AT1G76550	TIM	FBA1	ENOC	LOS2	PPC2	AT2G42910
STRING clusters CL:9682 Carbon metabolism	and branched-chain amino acid catabolic process 33 191 1.03 5.71e-19 3702.AT1G04410.1	3702.AT1G12000.1	3702.AT1G12900.1	3702.AT1G13440.1	3702.AT1G23190.1	3702.AT1G42970.1	3702.AT1G43670.1	3702.AT1G53310.3	3702.AT1G70730.3	3702.AT1G76550.1	3702.AT2G21170.1	3702.AT2G21330.1	3702.AT2G29560.1	3702.AT2G36530.1	3702.AT2G42600.1	3702.AT3G04790.1	3702.AT3G14940.1	3702.AT3G16950.2	3702.AT3G55440.1	3702.AT3G55800.1	3702.AT3G60750.1	3702.AT4G04040.1	3702.AT4G16155.1	3702.AT4G17260.1	3702.AT4G32840.1	3702.AT4G35830.1	3702.AT5G08570.1	3702.AT5G19550.1	3702.AT5G42740.1	3702.AT5G56350.1	3702.AT5G56630.1	3702.AT5G61410.1	3702.AT5G63680.1 c-NAD-MDH1	AT1G12000	GAPA-2	GAPC2	PGM3	GAPB	FBP	PPC1	PGM2	AT1G76550	TIM	FBA1	ENOC	LOS2	PPC2	EMB3119	PPC3
STRING clusters CL:9684 Pentose phosphate pathway	and Glycolysis 23 99 1.16 3.33e-15 3702.AT1G12000.1	3702.AT1G12900.1	3702.AT1G13440.1	3702.AT1G23190.1	3702.AT1G42970.1	3702.AT1G43670.1	3702.AT1G70730.3	3702.AT1G76550.1	3702.AT2G21170.1	3702.AT2G21330.1	3702.AT2G29560.1	3702.AT2G36530.1	3702.AT3G04790.1	3702.AT3G55440.1	3702.AT3G55800.1	3702.AT3G60750.1	3702.AT4G04040.1	3702.AT4G32840.1	3702.AT5G08570.1	3702.AT5G42740.1	3702.AT5G56630.1	3702.AT5G61410.1	3702.AT5G63680.1 AT1G12000	GAPA-2	GAPC2	PGM3	GAPB	FBP	PGM2	AT1G76550	TIM	FBA1	ENOC	LOS2	EMB3119	TPI	SBPASE	AT3G60750	MEE51	PFK6	AT5G08570	AT5G42740	PFK7	RPE	AT5G63680
STRING clusters CL:1092 Cytosolic large ribosomal subunit	and ribosomal protein p1/p2	n-terminal domain 22 111 1.09 2.63e-13 3702.AT1G18540.1	3702.AT1G33120.1	3702.AT1G74050.1	3702.AT2G01250.1	3702.AT2G19730.3	3702.AT2G27530.1	3702.AT2G39390.1	3702.AT2G44120.2	3702.AT3G07110.2	3702.AT3G13580.3	3702.AT3G16080.1	3702.AT3G18740.1	3702.AT3G52580.1	3702.AT3G53430.1	3702.AT3G60245.1	3702.AT3G62870.1	3702.AT4G00810.1	3702.AT4G15000.1	3702.AT4G18100.1	3702.AT4G29410.1	3702.AT5G27850.1	3702.AT5G67510.1 AT1G18540	RPL9B	AT1G74050	AT2G01250	AT2G19730	PGY1	AT2G39390	AT2G44120	AT3G07110	AT3G13580	AT3G16080	AT3G18740	AT3G52580	AT3G53430	AT3G60245	AT3G62870	AT4G00810	AT4G15000	AT4G18100	AT4G29410	AT5G27850	AT5G67510
STRING clusters CL:9685 Glycolytic process	and pyruvate kinase	c-terminal 19 71 1.22 2.63e-13 3702.AT1G12000.1	3702.AT1G12900.1	3702.AT1G13440.1	3702.AT1G23190.1	3702.AT1G42970.1	3702.AT1G70730.3	3702.AT1G76550.1	3702.AT2G21170.1	3702.AT2G21330.1	3702.AT2G29560.1	3702.AT2G36530.1	3702.AT3G55440.1	3702.AT3G55800.1	3702.AT4G04040.1	3702.AT4G32840.1	3702.AT5G08570.1	3702.AT5G42740.1	3702.AT5G56630.1	3702.AT5G63680.1 AT1G12000	GAPA-2	GAPC2	PGM3	GAPB	PGM2	AT1G76550	TIM	FBA1	ENOC	LOS2	TPI	SBPASE	MEE51	PFK6	AT5G08570	AT5G42740	PFK7	AT5G63680
STRING clusters CL:9212 Amino-acid biosynthesis	and Alanine	aspartate and glutamate metabolism 24 174 0.93 1.17e-11 3702.AT1G15710.1	3702.AT1G50110.1	3702.AT1G65960.2	3702.AT1G69370.1	3702.AT2G37500.1	3702.AT2G39020.1	3702.AT3G06350.1	3702.AT3G25530.1	3702.AT3G29200.1	3702.AT3G49680.1	3702.AT3G54640.1	3702.AT3G60880.2	3702.AT4G02610.1	3702.AT4G13430.1	3702.AT4G17830.2	3702.AT4G19710.2	3702.AT4G27070.1	3702.AT4G34200.1	3702.AT5G08100.1	3702.AT5G10330.1	3702.AT5G10870.1	3702.AT5G14800.1	3702.AT5G21060.2	3702.AT5G66120.2 AT1G15710	AT1G50110	GAD2	CM3	AT2G37500	AT2G39020	MEE32	GLYR1	CM1	BCAT3	TSA2	DHDPS1	AT4G02610	IIL1	AT4G17830	AKHSDH2	TSB2	EDA9	ASPGA1	HPA1	CM2	P5CR	AT5G21060	AT5G66120
STRING clusters CL:9692 Glucose metabolic process	and enolase 14 37 1.37 2.84e-11 3702.AT1G12000.1	3702.AT1G12900.1	3702.AT1G13440.1	3702.AT1G42970.1	3702.AT2G21170.1	3702.AT2G21330.1	3702.AT2G29560.1	3702.AT2G36530.1	3702.AT3G55440.1	3702.AT3G55800.1	3702.AT4G04040.1	3702.AT5G08570.1	3702.AT5G56630.1	3702.AT5G63680.1 AT1G12000	GAPA-2	GAPC2	GAPB	TIM	FBA1	ENOC	LOS2	TPI	SBPASE	MEE51	AT5G08570	PFK7	AT5G63680
STRING clusters CL:1093 Cytosolic large ribosomal subunit	and ribosomal protein s13/s18 18 85 1.12 2.97e-11 3702.AT1G18540.1	3702.AT1G33120.1	3702.AT1G74050.1	3702.AT2G01250.1	3702.AT2G19730.3	3702.AT2G27530.1	3702.AT2G44120.2	3702.AT3G07110.2	3702.AT3G16080.1	3702.AT3G52580.1	3702.AT3G53430.1	3702.AT3G60245.1	3702.AT3G62870.1	3702.AT4G00810.1	3702.AT4G15000.1	3702.AT4G18100.1	3702.AT5G27850.1	3702.AT5G67510.1 AT1G18540	RPL9B	AT1G74050	AT2G01250	AT2G19730	PGY1	AT2G44120	AT3G07110	AT3G16080	AT3G52580	AT3G53430	AT3G60245	AT3G62870	AT4G00810	AT4G15000	AT4G18100	AT5G27850	AT5G67510
STRING clusters CL:10515 Mixed	incl. tyrosine metabolism	and cellular aldehyde metabolic process 18 88 1.1 4.51e-11 3702.AT1G06570.1	3702.AT1G11840.6	3702.AT1G12050.1	3702.AT1G44170.2	3702.AT1G54100.1	3702.AT1G60690.1	3702.AT1G60730.3	3702.AT1G62810.1	3702.AT1G67280.1	3702.AT1G74920.1	3702.AT2G02390.3	3702.AT2G03800.1	3702.AT2G41530.1	3702.AT3G02720.1	3702.AT3G10850.1	3702.AT5G24760.1	3702.AT5G49650.1	3702.AT5G51970.1 PDS1	GLX1	AT1G12050	ALDH3H1	ALDH7B4	AT1G60690	AT1G60730	CuAO1	AT1G67280	ALDH10A8	GSTZ1	GEK1	SFGH	DJ1D	GLY2	AT5G24760	XK-2	AT5G51970
STRING clusters CL:9686 Glycolysis	and Calvin cycle 15 50 1.27 4.51e-11 3702.AT1G12000.1	3702.AT1G12900.1	3702.AT1G13440.1	3702.AT1G42970.1	3702.AT2G21170.1	3702.AT2G21330.1	3702.AT2G29560.1	3702.AT2G36530.1	3702.AT3G55440.1	3702.AT3G55800.1	3702.AT4G04040.1	3702.AT4G32840.1	3702.AT5G08570.1	3702.AT5G56630.1	3702.AT5G63680.1 AT1G12000	GAPA-2	GAPC2	GAPB	TIM	FBA1	ENOC	LOS2	TPI	SBPASE	MEE51	PFK6	AT5G08570	PFK7	AT5G63680
STRING clusters CL:8025 Proteasome	and polyubiquitin modification-dependent protein binding 18 90 1.09 5.26e-11 3702.AT1G13060.2	3702.AT1G21720.1	3702.AT1G56450.1	3702.AT1G77440.1	3702.AT1G79210.2	3702.AT2G05840.1	3702.AT2G27020.1	3702.AT3G13235.1	3702.AT3G22110.1	3702.AT3G26340.1	3702.AT3G27430.2	3702.AT3G51260.1	3702.AT3G60820.1	3702.AT4G14800.2	3702.AT4G31300.2	3702.AT5G35590.1	3702.AT5G38470.1	3702.AT5G42790.1 PBE1	PBC1	PBG1	PBC2	AT1G79210	At2g05840	PAG1	DDI1	PAC1	AT3G26340	PBB1	PAD1	PBF1	PBD2	PBA1	At5g35590	RAD23D	PAF1
STRING clusters CL:8034 Proteasome complex 16 65 1.18 7.17e-11 3702.AT1G13060.2	3702.AT1G21720.1	3702.AT1G56450.1	3702.AT1G77440.1	3702.AT1G79210.2	3702.AT2G05840.1	3702.AT2G27020.1	3702.AT3G22110.1	3702.AT3G26340.1	3702.AT3G27430.2	3702.AT3G51260.1	3702.AT3G60820.1	3702.AT4G14800.2	3702.AT4G31300.2	3702.AT5G35590.1	3702.AT5G42790.1 PBE1	PBC1	PBG1	PBC2	AT1G79210	At2g05840	PAG1	PAC1	AT3G26340	PBB1	PAD1	PBF1	PBD2	PBA1	At5g35590	PAF1
STRING clusters CL:8038 Proteasome complex 15 57 1.21 1.46e-10 3702.AT1G13060.2	3702.AT1G21720.1	3702.AT1G77440.1	3702.AT1G79210.2	3702.AT2G05840.1	3702.AT2G27020.1	3702.AT3G22110.1	3702.AT3G26340.1	3702.AT3G27430.2	3702.AT3G51260.1	3702.AT3G60820.1	3702.AT4G14800.2	3702.AT4G31300.2	3702.AT5G35590.1	3702.AT5G42790.1 PBE1	PBC1	PBC2	AT1G79210	At2g05840	PAG1	PAC1	AT3G26340	PBB1	PAD1	PBF1	PBD2	PBA1	At5g35590	PAF1
STRING clusters CL:8002 Mixed	incl. proteasome	and ubiquitin homologues 21 184 0.85 4.43e-09 3702.AT1G13060.2	3702.AT1G21720.1	3702.AT1G31340.1	3702.AT1G56450.1	3702.AT1G77440.1	3702.AT1G79210.2	3702.AT2G05840.1	3702.AT2G27020.1	3702.AT3G13235.1	3702.AT3G22110.1	3702.AT3G26340.1	3702.AT3G27430.2	3702.AT3G51260.1	3702.AT3G53970.1	3702.AT3G60820.1	3702.AT4G05420.1	3702.AT4G14800.2	3702.AT4G31300.2	3702.AT5G35590.1	3702.AT5G38470.1	3702.AT5G42790.1 PBE1	PBC1	RUB1	PBG1	PBC2	AT1G79210	At2g05840	PAG1	DDI1	PAC1	AT3G26340	PBB1	PAD1	AT3G53970	PBF1	DDB1A	PBD2	PBA1	At5g35590	RAD23D	PAF1
STRING clusters CL:8003 Mixed	incl. proteasome	and ubiquitin homologues 20 174 0.85 1.10e-08 3702.AT1G13060.2	3702.AT1G21720.1	3702.AT1G31340.1	3702.AT1G56450.1	3702.AT1G77440.1	3702.AT1G79210.2	3702.AT2G05840.1	3702.AT2G27020.1	3702.AT3G13235.1	3702.AT3G22110.1	3702.AT3G26340.1	3702.AT3G27430.2	3702.AT3G51260.1	3702.AT3G60820.1	3702.AT4G05420.1	3702.AT4G14800.2	3702.AT4G31300.2	3702.AT5G35590.1	3702.AT5G38470.1	3702.AT5G42790.1 PBE1	PBC1	RUB1	PBG1	PBC2	AT1G79210	At2g05840	PAG1	DDI1	PAC1	AT3G26340	PBB1	PAD1	PBF1	DDB1A	PBD2	PBA1	At5g35590	RAD23D	PAF1
STRING clusters CL:9695 Gluconeogenesis	and phosphoglycerate mutase activity 11 32 1.33 1.17e-08 3702.AT1G12000.1	3702.AT1G12900.1	3702.AT1G13440.1	3702.AT1G42970.1	3702.AT2G21170.1	3702.AT2G21330.1	3702.AT2G29560.1	3702.AT2G36530.1	3702.AT3G55440.1	3702.AT3G55800.1	3702.AT4G04040.1 AT1G12000	GAPA-2	GAPC2	GAPB	TIM	FBA1	ENOC	LOS2	TPI	SBPASE	MEE51
STRING clusters CL:9697 Gluconeogenesis	and phosphoglycerate mutase activity 10 27 1.36 4.71e-08 3702.AT1G12900.1	3702.AT1G13440.1	3702.AT1G42970.1	3702.AT2G21170.1	3702.AT2G21330.1	3702.AT2G29560.1	3702.AT2G36530.1	3702.AT3G55440.1	3702.AT3G55800.1	3702.AT4G04040.1 GAPA-2	GAPC2	GAPB	TIM	FBA1	ENOC	LOS2	TPI	SBPASE	MEE51
STRING clusters CL:8119 Proteasome subunit 8 12 1.61 8.33e-08 3702.AT1G13060.2	3702.AT1G77440.1	3702.AT3G22110.1	3702.AT3G27430.2	3702.AT4G14800.2	3702.AT4G31300.2	3702.AT5G35590.1	3702.AT5G42790.1 PBE1	PBC2	PAC1	PBB1	PBD2	PBA1	At5g35590	PAF1
STRING clusters CL:1314 Cytosolic small ribosomal subunit 13 86 0.97 1.20e-06 3702.AT1G14320.1	3702.AT1G15930.1	3702.AT1G18080.1	3702.AT2G09990.1	3702.AT2G34480.1	3702.AT2G40590.1	3702.AT3G02560.2	3702.AT3G10610.1	3702.AT3G53870.1	3702.AT3G61110.1	3702.AT3G62250.1	3702.AT4G34555.1	3702.AT5G03850.1 SAC52	AT1G15930	ATARCA	AT2G09990	AT2G34480	AT2G40590	AT3G02560	AT3G10610	AT3G53870	RS27A	UBQ5	AT4G34555	AT3G10090
STRING clusters CL:1202 Cytosolic large ribosomal subunit 9 30 1.27 1.53e-06 3702.AT1G33120.1	3702.AT1G74050.1	3702.AT2G01250.1	3702.AT2G19730.3	3702.AT3G07110.2	3702.AT3G16080.1	3702.AT4G00810.1	3702.AT4G18100.1	3702.AT5G27850.1 RPL9B	AT1G74050	AT2G01250	AT2G19730	AT3G07110	AT3G16080	AT4G00810	AT4G18100	AT5G27850
STRING clusters CL:10516 Mixed	incl. aldehyde catabolic process	and beta-alanine metabolism 11 57 1.08 1.76e-06 3702.AT1G11840.6	3702.AT1G44170.2	3702.AT1G54100.1	3702.AT1G62810.1	3702.AT1G67280.1	3702.AT1G74920.1	3702.AT2G03800.1	3702.AT2G41530.1	3702.AT3G02720.1	3702.AT3G10850.1	3702.AT5G24760.1 GLX1	ALDH3H1	ALDH7B4	CuAO1	AT1G67280	ALDH10A8	GEK1	SFGH	DJ1D	GLY2	AT5G24760
STRING clusters CL:9213 Glutamine family amino acid metabolic process	and 2-oxocarboxylic acid metabolism 14 116 0.87 3.82e-06 3702.AT1G50110.1	3702.AT1G65960.2	3702.AT2G37500.1	3702.AT2G39020.1	3702.AT3G25530.1	3702.AT3G49680.1	3702.AT3G60880.2	3702.AT4G13430.1	3702.AT4G17830.2	3702.AT4G19710.2	3702.AT4G34200.1	3702.AT5G08100.1	3702.AT5G14800.1	3702.AT5G21060.2 AT1G50110	GAD2	AT2G37500	AT2G39020	GLYR1	BCAT3	DHDPS1	IIL1	AT4G17830	AKHSDH2	EDA9	ASPGA1	P5CR	AT5G21060
STRING clusters CL:1205 Cytosolic large ribosomal subunit 8 25 1.3 6.26e-06 3702.AT1G33120.1	3702.AT1G74050.1	3702.AT2G01250.1	3702.AT2G19730.3	3702.AT3G07110.2	3702.AT3G16080.1	3702.AT4G18100.1	3702.AT5G27850.1 RPL9B	AT1G74050	AT2G01250	AT2G19730	AT3G07110	AT3G16080	AT4G18100	AT5G27850
STRING clusters CL:10690 Mixed	incl. pyridine-containing compound metabolic process	and nudix domain 11 69 0.99 9.23e-06 3702.AT1G02880.3	3702.AT1G55090.1	3702.AT1G79690.1	3702.AT2G22570.1	3702.AT3G16050.1	3702.AT3G16990.1	3702.AT4G14930.1	3702.AT4G36940.1	3702.AT5G01410.1	3702.AT5G19150.1	3702.AT5G20070.1 TPK1	AT1G55090	NUDT3	NIC1	PDX1.2	AT3G16990	AT4G14930	NAPRT1	RSR4	AT5G19150	NUDX19
STRING clusters CL:1208 Cytosolic large ribosomal subunit 7 18 1.38 1.44e-05 3702.AT1G33120.1	3702.AT2G01250.1	3702.AT2G19730.3	3702.AT3G07110.2	3702.AT3G16080.1	3702.AT4G18100.1	3702.AT5G27850.1 RPL9B	AT2G01250	AT2G19730	AT3G07110	AT3G16080	AT4G18100	AT5G27850
STRING clusters CL:9444 Phenylalanine	tyrosine and tryptophan biosynthesis	and histidine metabolic process 10 58 1.03 1.83e-05 3702.AT1G15710.1	3702.AT1G69370.1	3702.AT3G06350.1	3702.AT3G29200.1	3702.AT3G54640.1	3702.AT4G02610.1	3702.AT4G27070.1	3702.AT5G10330.1	3702.AT5G10870.1	3702.AT5G66120.2 AT1G15710	CM3	MEE32	CM1	TSA2	AT4G02610	TSB2	HPA1	CM2	AT5G66120
STRING clusters CL:9727 Gluconeogenesis	and glyceraldehyde-3-phosphate dehydrogenase (nadp+) (phosphorylating) activity 6 12 1.49 3.65e-05 3702.AT1G12900.1	3702.AT1G42970.1	3702.AT2G21170.1	3702.AT2G21330.1	3702.AT3G55800.1	3702.AT4G04040.1 GAPA-2	GAPB	TIM	FBA1	SBPASE	MEE51
STRING clusters CL:1094 Cytosolic large ribosomal subunit	and ribosomal protein s13/s18 9 54 1.01 9.61e-05 3702.AT1G18540.1	3702.AT2G27530.1	3702.AT2G44120.2	3702.AT3G52580.1	3702.AT3G53430.1	3702.AT3G60245.1	3702.AT3G62870.1	3702.AT4G15000.1	3702.AT5G67510.1 AT1G18540	PGY1	AT2G44120	AT3G52580	AT3G53430	AT3G60245	AT3G62870	AT4G15000	AT5G67510
STRING clusters CL:1096 Cytosolic large ribosomal subunit 8 42 1.07 0.00016 3702.AT1G18540.1	3702.AT2G27530.1	3702.AT2G44120.2	3702.AT3G53430.1	3702.AT3G60245.1	3702.AT3G62870.1	3702.AT4G15000.1	3702.AT5G67510.1 AT1G18540	PGY1	AT2G44120	AT3G53430	AT3G60245	AT3G62870	AT4G15000	AT5G67510
STRING clusters CL:33651 Nucleotide-sugar metabolic process	and udp-glucuronate 4-epimerase activity 8 44 1.05 0.00021 3702.AT1G17890.1	3702.AT1G26570.1	3702.AT3G29360.1	3702.AT3G46440.2	3702.AT3G51160.1	3702.AT5G15490.1	3702.AT5G16510.2	3702.AT5G59290.2 At1g17890	UGD1	UGD2	UXS5	MUR1	UGD3	RGP5	UXS3
STRING clusters CL:1210 Mixed	incl. ribosomal protein l32	and ribosomal protein l28e 5 9 1.54 0.00024 3702.AT2G01250.1	3702.AT2G19730.3	3702.AT3G07110.2	3702.AT4G18100.1	3702.AT5G27850.1 AT2G01250	AT2G19730	AT3G07110	AT4G18100	AT5G27850
STRING clusters CL:10629 Mixed	incl. aldo/keto reductase family	and tyrosine catabolism 7 31 1.14 0.00026 3702.AT1G06570.1	3702.AT1G12050.1	3702.AT1G60690.1	3702.AT1G60730.3	3702.AT2G02390.3	3702.AT5G49650.1	3702.AT5G51970.1 PDS1	AT1G12050	AT1G60690	AT1G60730	GSTZ1	XK-2	AT5G51970
STRING clusters CL:8065 Proteasome subunit 5 10 1.49 0.00033 3702.AT1G21720.1	3702.AT1G79210.2	3702.AT2G05840.1	3702.AT3G26340.1	3702.AT3G51260.1 PBC1	AT1G79210	At2g05840	AT3G26340	PAD1
STRING clusters CL:9885 Citrate cycle (TCA cycle)	and alpha-ketoacid dehydrogenase activity 10 88 0.85 0.00046 3702.AT1G04410.1	3702.AT1G53310.3	3702.AT2G42600.1	3702.AT3G14940.1	3702.AT3G16950.2	3702.AT4G16155.1	3702.AT4G17260.1	3702.AT4G35830.1	3702.AT5G19550.1	3702.AT5G56350.1 c-NAD-MDH1	PPC1	PPC2	PPC3	LPD1	AT4G16155	AT4G17260	At4g35830	ASP2	AT5G56350
STRING clusters CL:1315 Cytosolic small ribosomal subunit 9 70 0.9 0.00055 3702.AT1G15930.1	3702.AT2G09990.1	3702.AT2G40590.1	3702.AT3G02560.2	3702.AT3G10610.1	3702.AT3G61110.1	3702.AT3G62250.1	3702.AT4G34555.1	3702.AT5G03850.1 AT1G15930	AT2G09990	AT2G40590	AT3G02560	AT3G10610	RS27A	UBQ5	AT4G34555	AT3G10090
STRING clusters CL:1098 Cytosolic large ribosomal subunit 7 36 1.08 0.00056 3702.AT1G18540.1	3702.AT2G27530.1	3702.AT3G53430.1	3702.AT3G60245.1	3702.AT3G62870.1	3702.AT4G15000.1	3702.AT5G67510.1 AT1G18540	PGY1	AT3G53430	AT3G60245	AT3G62870	AT4G15000	AT5G67510
STRING clusters CL:33656 Aminoglycan biosynthetic process	and udp-glucuronate decarboxylase activity 5 12 1.41 0.00060 3702.AT1G26570.1	3702.AT3G29360.1	3702.AT3G46440.2	3702.AT5G15490.1	3702.AT5G59290.2 UGD1	UGD2	UXS5	UGD3	UXS3
STRING clusters CL:1099 Cytosolic large ribosomal subunit 6 23 1.21 0.00061 3702.AT1G18540.1	3702.AT2G27530.1	3702.AT3G53430.1	3702.AT3G60245.1	3702.AT3G62870.1	3702.AT5G67510.1 AT1G18540	PGY1	AT3G53430	AT3G60245	AT3G62870	AT5G67510
STRING clusters CL:10518 beta-Alanine metabolism	and formaldehyde catabolic process 7 37 1.07 0.00062 3702.AT1G44170.2	3702.AT1G54100.1	3702.AT1G62810.1	3702.AT1G74920.1	3702.AT2G03800.1	3702.AT2G41530.1	3702.AT5G24760.1 ALDH3H1	ALDH7B4	CuAO1	ALDH10A8	GEK1	SFGH	AT5G24760
STRING clusters CL:10029 Mixed	incl. phosphoenolpyruvate carboxykinase activity	and malate dehydrogenase	type 2 5 13 1.38 0.00077 3702.AT1G53310.3	3702.AT2G42600.1	3702.AT3G14940.1	3702.AT5G19550.1	3702.AT5G56350.1 PPC1	PPC2	PPC3	ASP2	AT5G56350
STRING clusters CL:11337 Glutathione metabolism	and Redox-active center 13 168 0.68 0.00077 3702.AT1G19570.1	3702.AT1G78380.1	3702.AT2G15570.2	3702.AT2G17420.1	3702.AT2G29450.1	3702.AT2G30870.1	3702.AT3G15360.1	3702.AT3G52880.2	3702.AT4G25100.1	3702.AT5G06290.1	3702.AT5G20500.1	3702.AT5G21105.1	3702.AT5G37830.1 DHAR1	GSTU19	ATHM3	NTRA	GSTU5	GSTF10	TRX-M4	MDAR1	FSD1	At5g06290	AT5G20500	AT5G21105	OXP1
STRING clusters CL:8039 Proteasome 7 39 1.04 0.00079 3702.AT1G21720.1	3702.AT1G79210.2	3702.AT2G05840.1	3702.AT2G27020.1	3702.AT3G26340.1	3702.AT3G51260.1	3702.AT3G60820.1 PBC1	AT1G79210	At2g05840	PAG1	AT3G26340	PAD1	PBF1
STRING clusters CL:9510 Aromatic amino acid biosynthesis 6 25 1.17 0.00083 3702.AT1G15710.1	3702.AT1G69370.1	3702.AT3G06350.1	3702.AT3G29200.1	3702.AT5G10870.1	3702.AT5G66120.2 AT1G15710	CM3	MEE32	CM1	CM2	AT5G66120
STRING clusters CL:10137 Mixed	incl. pyrimidine metabolism	and purine nucleoside monophosphate metabolic process 11 121 0.75 0.00090 3702.AT1G05620.1	3702.AT1G48170.1	3702.AT1G71750.2	3702.AT2G20690.1	3702.AT3G09820.1	3702.AT3G18030.1	3702.AT4G13720.1	3702.AT4G29680.1	3702.AT5G28050.2	3702.AT5G63310.1	3702.AT5G64370.1 URH2	AT1G48170	HGPT	AT2G20690	At3g09820	HAL3A	AT4G13720	AT4G29680	AT5G28050	NDPK2	BETA-UP
STRING clusters CL:33425 Starch and sucrose metabolism	and nucleotide-sugar metabolic process 13 182 0.64 0.0015 3702.AT1G17890.1	3702.AT1G26570.1	3702.AT2G35840.3	3702.AT3G29360.1	3702.AT3G43190.1	3702.AT3G46440.2	3702.AT3G46970.1	3702.AT3G51160.1	3702.AT5G11720.1	3702.AT5G15490.1	3702.AT5G16510.2	3702.AT5G20830.1	3702.AT5G59290.2 At1g17890	UGD1	AT2G35840	UGD2	SUS4	UXS5	PHS2	MUR1	AT5G11720	UGD3	RGP5	SUS1	UXS3
STRING clusters CL:10138 Pyrimidine metabolism	and purine nucleoside monophosphate metabolic process 9 89 0.8 0.0025 3702.AT1G05620.1	3702.AT1G48170.1	3702.AT1G71750.2	3702.AT3G09820.1	3702.AT4G13720.1	3702.AT4G29680.1	3702.AT5G28050.2	3702.AT5G63310.1	3702.AT5G64370.1 URH2	AT1G48170	HGPT	At3g09820	AT4G13720	AT4G29680	AT5G28050	NDPK2	BETA-UP
STRING clusters CL:10735 Nicotinamide nucleotide biosynthetic process	and nicotinate and nicotinamide metabolism 5 19 1.21 0.0030 3702.AT1G55090.1	3702.AT2G22570.1	3702.AT4G14930.1	3702.AT4G36940.1	3702.AT5G20070.1 AT1G55090	NIC1	AT4G14930	NAPRT1	NUDX19
STRING clusters CL:33653 Nucleotide-sugar metabolic process	and udp-glucuronate 4-epimerase activity 6 33 1.05 0.0030 3702.AT1G26570.1	3702.AT3G29360.1	3702.AT3G46440.2	3702.AT5G15490.1	3702.AT5G16510.2	3702.AT5G59290.2 UGD1	UGD2	UXS5	UGD3	RGP5	UXS3
STRING clusters CL:9335 Mixed	incl. valine	leucine and isoleucine biosynthesis	and lysine biosynthetic process 7 55 0.9 0.0049 3702.AT1G50110.1	3702.AT3G49680.1	3702.AT3G60880.2	3702.AT4G13430.1	3702.AT4G19710.2	3702.AT4G34200.1	3702.AT5G21060.2 AT1G50110	BCAT3	DHDPS1	IIL1	AKHSDH2	EDA9	AT5G21060
STRING clusters CL:1317 Cytosolic small ribosomal subunit 5 23 1.13 0.0061 3702.AT1G15930.1	3702.AT2G40590.1	3702.AT3G10610.1	3702.AT3G61110.1	3702.AT5G03850.1 AT1G15930	AT2G40590	AT3G10610	RS27A	AT3G10090
STRING clusters CL:10691 NUDIX domain	and pyridine nucleotide biosynthetic process 6 41 0.96 0.0080 3702.AT1G55090.1	3702.AT1G79690.1	3702.AT2G22570.1	3702.AT4G14930.1	3702.AT4G36940.1	3702.AT5G20070.1 AT1G55090	NUDT3	NIC1	AT4G14930	NAPRT1	NUDX19
STRING clusters CL:1322 Cytosolic small ribosomal subunit 4 12 1.31 0.0080 3702.AT1G15930.1	3702.AT2G40590.1	3702.AT3G10610.1	3702.AT3G61110.1 AT1G15930	AT2G40590	AT3G10610	RS27A
STRING clusters CL:9214 Glutamine family amino acid metabolic process	and n-acyl-l-amino-acid amidohydrolase 7 61 0.85 0.0082 3702.AT1G65960.2	3702.AT2G37500.1	3702.AT2G39020.1	3702.AT3G25530.1	3702.AT4G17830.2	3702.AT5G08100.1	3702.AT5G14800.1 GAD2	AT2G37500	AT2G39020	GLYR1	AT4G17830	ASPGA1	P5CR
STRING clusters CL:10772 Thiamine metabolism	and pyridoxine metabolic process 5 28 1.04 0.0126 3702.AT1G02880.3	3702.AT3G16050.1	3702.AT3G16990.1	3702.AT5G01410.1	3702.AT5G19150.1 TPK1	PDX1.2	AT3G16990	RSR4	AT5G19150
STRING clusters CL:9511 Aromatic amino acid family biosynthetic process	prephenate pathway	and chorismate mutase activity 4 14 1.25 0.0126 3702.AT1G15710.1	3702.AT1G69370.1	3702.AT3G29200.1	3702.AT5G10870.1 AT1G15710	CM3	CM1	CM2
STRING clusters CL:11552 Cell redox homeostasis	and thioredoxin reductase 5 29 1.03 0.0143 3702.AT2G15570.2	3702.AT2G17420.1	3702.AT3G15360.1	3702.AT5G06290.1	3702.AT5G20500.1 ATHM3	NTRA	TRX-M4	At5g06290	AT5G20500
STRING clusters CL:22252 Inositol phosphate metabolic process	and inositol-pentakisphosphate 2-kinase 5 29 1.03 0.0143 3702.AT1G31190.1	3702.AT2G22240.1	3702.AT4G39800.1	3702.AT5G16760.1	3702.AT5G63990.1 IMPL1	MIPS2	MIPS1	ITPK1	AT5G63990
STRING clusters CL:10631 Aldo/keto reductase family	and Xylose isomerase 4 15 1.22 0.0149 3702.AT1G60690.1	3702.AT1G60730.3	3702.AT5G49650.1	3702.AT5G51970.1 AT1G60690	AT1G60730	XK-2	AT5G51970
STRING clusters CL:1399 Cytosolic small ribosomal subunit 4 15 1.22 0.0149 3702.AT2G09990.1	3702.AT3G02560.2	3702.AT3G62250.1	3702.AT4G34555.1 AT2G09990	AT3G02560	UBQ5	AT4G34555
STRING clusters CL:26813 Mixed	incl. vid27 cytoplasmic protein	and phospholipase a1-ii 3 5 1.57 0.0149 3702.AT2G42690.1	3702.AT4G02340.1	3702.AT4G15790.1 AT2G42690	AT4G02340	AT4G15790
STRING clusters CL:2682 Mixed	incl. gcd10p family	and putative rna methylase domain 3 5 1.57 0.0149 3702.AT2G22400.1	3702.AT2G45730.1	3702.AT5G14600.1 AT2G22400	AT2G45730	AT5G14600
STRING clusters CL:33659 Aminoglycan biosynthetic process	and udp-glucuronate decarboxylase activity 3 5 1.57 0.0149 3702.AT3G29360.1	3702.AT3G46440.2	3702.AT5G15490.1 UGD2	UXS5	UGD3
STRING clusters CL:9698 Mixed	incl. phosphoglycerate mutase activity	and enolase 4 15 1.22 0.0149 3702.AT1G13440.1	3702.AT2G29560.1	3702.AT2G36530.1	3702.AT3G55440.1 GAPC2	ENOC	LOS2	TPI
STRING clusters CL:10598 Ketone catabolic process	and glyoxalase/fosfomycin resistance/dioxygenase domain 4 16 1.19 0.0170 3702.AT1G11840.6	3702.AT1G67280.1	3702.AT3G02720.1	3702.AT3G10850.1 GLX1	AT1G67280	DJ1D	GLY2
STRING clusters CL:1454 Polysomal ribosome 4 16 1.19 0.0170 3702.AT1G14320.1	3702.AT1G18080.1	3702.AT2G34480.1	3702.AT3G53870.1 SAC52	ATARCA	AT2G34480	AT3G53870
STRING clusters CL:9831 Pentose-phosphate shunt	and transaldolase/fructose-6-phosphate aldolase 4 16 1.19 0.0170 3702.AT1G43670.1	3702.AT3G04790.1	3702.AT3G60750.1	3702.AT5G61410.1 FBP	EMB3119	AT3G60750	RPE
STRING clusters CL:10674 Tyrosine catabolism	and acylpyruvate hydrolase activity 3 6 1.49 0.0200 3702.AT1G06570.1	3702.AT1G12050.1	3702.AT2G02390.3 PDS1	AT1G12050	GSTZ1
STRING clusters CL:1100 Cytosolic large ribosomal subunit 4 17 1.16 0.0200 3702.AT1G18540.1	3702.AT2G27530.1	3702.AT3G60245.1	3702.AT3G62870.1 AT1G18540	PGY1	AT3G60245	AT3G62870
STRING clusters CL:11339 Glutathione metabolism	and superoxide dismutase activity 8 99 0.7 0.0200 3702.AT1G19570.1	3702.AT1G78380.1	3702.AT2G29450.1	3702.AT2G30870.1	3702.AT3G52880.2	3702.AT4G25100.1	3702.AT5G21105.1	3702.AT5G37830.1 DHAR1	GSTU19	GSTU5	GSTF10	MDAR1	FSD1	AT5G21105	OXP1
STRING clusters CL:4903 Prefoldin complex	and prefoldin subunit 3 6 1.49 0.0200 3702.AT1G08780.1	3702.AT5G23290.1	3702.AT5G49510.1 AIP3	PFD5	PFD3
STRING clusters CL:9729 Fructose 1	6-bisphosphate metabolic process	and phosphoglycerate kinase	conserved site 3 6 1.49 0.0200 3702.AT1G42970.1	3702.AT2G21330.1	3702.AT3G55800.1 GAPB	FBA1	SBPASE
STRING clusters CL:10032 Mixed	incl. phosphoenolpyruvate carboxykinase activity	and pyruvate	phosphate dikinase 3 7 1.42 0.0269 3702.AT2G42600.1	3702.AT3G14940.1	3702.AT5G19550.1 PPC2	PPC3	ASP2
STRING clusters CL:18651 Mixed	incl. prenylation	and rab gdi protein 4 19 1.11 0.0269 3702.AT1G43890.1	3702.AT2G44100.1	3702.AT3G06540.1	3702.AT3G59380.1 RABC1	GDI1	REP	FTA
STRING clusters CL:22295 Inositol biosynthetic process 3 7 1.42 0.0269 3702.AT1G31190.1	3702.AT2G22240.1	3702.AT4G39800.1 IMPL1	MIPS2	MIPS1
STRING clusters CL:33534 Sucrose-phosphatase-like	N-terminal	and Sucrose synthase	plant/cyanobacteria 3 7 1.42 0.0269 3702.AT2G35840.3	3702.AT3G43190.1	3702.AT5G20830.1 AT2G35840	SUS4	SUS1
STRING clusters CL:9514 Aromatic amino acid family biosynthetic process	prephenate pathway	and chorismate mutase activity 3 7 1.42 0.0269 3702.AT1G15710.1	3702.AT3G29200.1	3702.AT5G10870.1 AT1G15710	CM1	CM2
STRING clusters CL:9336 Branched-chain amino acid biosynthesis	and lysine biosynthetic process 5 38 0.91 0.0334 3702.AT3G49680.1	3702.AT3G60880.2	3702.AT4G13430.1	3702.AT4G19710.2	3702.AT5G21060.2 BCAT3	DHDPS1	IIL1	AKHSDH2	AT5G21060
STRING clusters CL:9788 Alpha-D-phosphohexomutase superfamily	and Phosphoglucose isomerase 3 8 1.36 0.0339 3702.AT1G23190.1	3702.AT1G70730.3	3702.AT5G42740.1 PGM3	PGM2	AT5G42740
STRING clusters CL:9785 Mixed	incl. hexokinase activity	and alpha-d-phosphohexomutase superfamily 4 21 1.07 0.0344 3702.AT1G23190.1	3702.AT1G70730.3	3702.AT1G76550.1	3702.AT5G42740.1 PGM3	PGM2	AT1G76550	AT5G42740
STRING clusters CL:35772 Mixed	incl. serine carboxypeptidase	serine active site	and aminopeptidase 6 61 0.78 0.0376 3702.AT1G47710.1	3702.AT4G20850.1	3702.AT4G33090.1	3702.AT4G36195.3	3702.AT5G13520.1	3702.AT5G60160.1 SERPIN1	TPP2	APM1	AT4G36195	AT5G13520	AT5G60160
KEGG ath01100 Metabolic pathways 157 2275 0.63 1.08e-53 3702.AT1G02880.3	3702.AT1G04410.1	3702.AT1G06570.1	3702.AT1G11840.6	3702.AT1G12000.1	3702.AT1G12050.1	3702.AT1G12840.1	3702.AT1G12900.1	3702.AT1G13440.1	3702.AT1G15710.1	3702.AT1G17890.1	3702.AT1G19570.1	3702.AT1G20020.1	3702.AT1G23190.1	3702.AT1G23820.1	3702.AT1G26570.1	3702.AT1G30510.2	3702.AT1G31190.1	3702.AT1G32060.1	3702.AT1G42970.1	3702.AT1G43670.1	3702.AT1G44170.2	3702.AT1G50110.1	3702.AT1G50170.1	3702.AT1G50480.1	3702.AT1G52570.1	3702.AT1G53310.3	3702.AT1G54100.1	3702.AT1G55090.1	3702.AT1G62810.1	3702.AT1G65960.2	3702.AT1G67090.1	3702.AT1G67280.1	3702.AT1G69370.1	3702.AT1G70310.1	3702.AT1G70410.2	3702.AT1G70730.3	3702.AT1G71170.1	3702.AT1G71750.2	3702.AT1G72680.1	3702.AT1G74920.1	3702.AT1G76550.1	3702.AT1G78380.1	3702.AT1G80360.1	3702.AT1G80460.1	3702.AT2G02390.3	3702.AT2G14260.1	3702.AT2G20690.1	3702.AT2G21170.1	3702.AT2G21330.1
KEGG ath01110 Biosynthesis of secondary metabolites 88 1216 0.65 2.39e-29 3702.AT1G04410.1	3702.AT1G12000.1	3702.AT1G13440.1	3702.AT1G15710.1	3702.AT1G23190.1	3702.AT1G31190.1	3702.AT1G43670.1	3702.AT1G44170.2	3702.AT1G50110.1	3702.AT1G50170.1	3702.AT1G52570.1	3702.AT1G54100.1	3702.AT1G62810.1	3702.AT1G65960.2	3702.AT1G67090.1	3702.AT1G69370.1	3702.AT1G70730.3	3702.AT1G71750.2	3702.AT1G72680.1	3702.AT1G76550.1	3702.AT2G20690.1	3702.AT2G21170.1	3702.AT2G21330.1	3702.AT2G22240.1	3702.AT2G27150.2	3702.AT2G29560.1	3702.AT2G35840.3	3702.AT2G36530.1	3702.AT2G37500.1	3702.AT3G01590.2	3702.AT3G03780.1	3702.AT3G04520.1	3702.AT3G04790.1	3702.AT3G06350.1	3702.AT3G16950.2	3702.AT3G25780.1	3702.AT3G29200.1	3702.AT3G43190.1	3702.AT3G46970.1	3702.AT3G47000.1	3702.AT3G49680.1	3702.AT3G54640.1	3702.AT3G55440.1	3702.AT3G59380.1	3702.AT3G60750.1	3702.AT3G60880.2	3702.AT4G02610.1	3702.AT4G04040.1	3702.AT4G13430.1	3702.AT4G16155.1
KEGG ath01230 Biosynthesis of amino acids 37 240 0.98 1.33e-21 3702.AT1G13440.1	3702.AT1G15710.1	3702.AT1G50110.1	3702.AT1G69370.1	3702.AT2G21170.1	3702.AT2G21330.1	3702.AT2G29560.1	3702.AT2G36530.1	3702.AT2G37500.1	3702.AT3G03780.1	3702.AT3G04520.1	3702.AT3G04790.1	3702.AT3G06350.1	3702.AT3G29200.1	3702.AT3G49680.1	3702.AT3G54640.1	3702.AT3G55440.1	3702.AT3G60750.1	3702.AT3G60880.2	3702.AT4G02610.1	3702.AT4G13430.1	3702.AT4G17830.2	3702.AT4G19710.2	3702.AT4G27070.1	3702.AT4G32840.1	3702.AT4G34200.1	3702.AT4G35830.1	3702.AT5G08570.1	3702.AT5G10870.1	3702.AT5G14800.1	3702.AT5G19550.1	3702.AT5G56350.1	3702.AT5G56630.1	3702.AT5G56760.1	3702.AT5G61410.1	3702.AT5G63680.1	3702.AT5G66120.2 GAPC2	AT1G15710	AT1G50110	CM3	TIM	FBA1	ENOC	LOS2	AT2G37500	MS2	THA2	EMB3119	MEE32	CM1
KEGG ath00010 Glycolysis / Gluconeogenesis 26 116 1.14 1.08e-18 3702.AT1G12000.1	3702.AT1G13440.1	3702.AT1G23190.1	3702.AT1G43670.1	3702.AT1G44170.2	3702.AT1G54100.1	3702.AT1G70730.3	3702.AT1G76550.1	3702.AT2G21170.1	3702.AT2G21330.1	3702.AT2G29560.1	3702.AT2G36530.1	3702.AT3G01590.2	3702.AT3G16950.2	3702.AT3G55440.1	3702.AT4G04040.1	3702.AT4G16155.1	3702.AT4G17260.1	3702.AT4G32840.1	3702.AT5G08570.1	3702.AT5G24760.1	3702.AT5G42740.1	3702.AT5G56350.1	3702.AT5G56630.1	3702.AT5G57330.1	3702.AT5G63680.1 AT1G12000	GAPC2	PGM3	FBP	ALDH3H1	ALDH7B4	PGM2	AT1G76550	TIM	FBA1	ENOC	LOS2	AT3G01590	LPD1	TPI	MEE51	AT4G16155	AT4G17260	PFK6	AT5G08570	AT5G24760	AT5G42740	AT5G56350	PFK7	AT5G57330
KEGG ath01200 Carbon metabolism 35 268 0.91 1.57e-18 3702.AT1G04410.1	3702.AT1G12900.1	3702.AT1G13440.1	3702.AT1G32060.1	3702.AT1G42970.1	3702.AT1G43670.1	3702.AT1G50480.1	3702.AT1G53310.3	3702.AT1G67090.1	3702.AT2G21170.1	3702.AT2G21330.1	3702.AT2G29560.1	3702.AT2G36530.1	3702.AT2G41530.1	3702.AT2G42600.1	3702.AT3G04790.1	3702.AT3G14940.1	3702.AT3G16950.2	3702.AT3G25530.1	3702.AT3G55440.1	3702.AT3G55800.1	3702.AT3G60750.1	3702.AT4G16155.1	3702.AT4G32840.1	3702.AT4G34200.1	3702.AT4G35830.1	3702.AT5G08570.1	3702.AT5G19550.1	3702.AT5G42740.1	3702.AT5G48230.2	3702.AT5G56350.1	3702.AT5G56630.1	3702.AT5G56760.1	3702.AT5G61410.1	3702.AT5G63680.1 c-NAD-MDH1	GAPA-2	GAPC2	PRK	GAPB	FBP	THFS	PPC1	RBCS1A	TIM	FBA1	ENOC	LOS2	SFGH	PPC2	EMB3119
KEGG ath03010 Ribosome 37 318 0.86 3.71e-18 3702.AT1G08360.1	3702.AT1G14320.1	3702.AT1G15930.1	3702.AT1G18540.1	3702.AT1G33120.1	3702.AT1G74050.1	3702.AT2G01250.1	3702.AT2G09990.1	3702.AT2G19730.3	3702.AT2G27530.1	3702.AT2G34480.1	3702.AT2G39390.1	3702.AT2G40590.1	3702.AT2G44120.2	3702.AT3G02560.2	3702.AT3G07110.2	3702.AT3G09500.1	3702.AT3G10610.1	3702.AT3G13580.3	3702.AT3G16080.1	3702.AT3G18740.1	3702.AT3G27850.1	3702.AT3G52580.1	3702.AT3G53430.1	3702.AT3G53870.1	3702.AT3G60245.1	3702.AT3G61110.1	3702.AT3G62250.1	3702.AT3G62870.1	3702.AT4G00810.1	3702.AT4G15000.1	3702.AT4G18100.1	3702.AT4G29410.1	3702.AT4G34555.1	3702.AT4G36130.1	3702.AT5G27850.1	3702.AT5G67510.1 AT1G08360	SAC52	AT1G15930	AT1G18540	RPL9B	AT1G74050	AT2G01250	AT2G09990	AT2G19730	PGY1	AT2G34480	AT2G39390	AT2G40590	AT2G44120
KEGG ath00710 Carbon fixation in photosynthetic organisms 18 69 1.21 4.23e-14 3702.AT1G04410.1	3702.AT1G12900.1	3702.AT1G13440.1	3702.AT1G32060.1	3702.AT1G42970.1	3702.AT1G43670.1	3702.AT1G53310.3	3702.AT1G67090.1	3702.AT2G21170.1	3702.AT2G21330.1	3702.AT2G42600.1	3702.AT3G04790.1	3702.AT3G14940.1	3702.AT3G55440.1	3702.AT3G55800.1	3702.AT3G60750.1	3702.AT5G19550.1	3702.AT5G61410.1 c-NAD-MDH1	GAPA-2	GAPC2	PRK	GAPB	FBP	PPC1	RBCS1A	TIM	FBA1	PPC2	EMB3119	PPC3	TPI	SBPASE	AT3G60750	ASP2	RPE
KEGG ath00620 Pyruvate metabolism 17 85 1.09 9.08e-12 3702.AT1G04410.1	3702.AT1G11840.6	3702.AT1G44170.2	3702.AT1G53310.3	3702.AT1G54100.1	3702.AT1G67280.1	3702.AT2G42600.1	3702.AT3G02720.1	3702.AT3G10850.1	3702.AT3G14940.1	3702.AT3G16950.2	3702.AT4G16155.1	3702.AT4G17260.1	3702.AT5G08570.1	3702.AT5G48230.2	3702.AT5G56350.1	3702.AT5G63680.1 c-NAD-MDH1	GLX1	ALDH3H1	PPC1	ALDH7B4	AT1G67280	PPC2	DJ1D	GLY2	PPC3	LPD1	AT4G16155	AT4G17260	AT5G08570	ACAT2	AT5G56350	AT5G63680
KEGG ath03050 Proteasome 15 58 1.2 9.08e-12 3702.AT1G21720.1	3702.AT1G56450.1	3702.AT1G77440.1	3702.AT1G79210.2	3702.AT2G05840.1	3702.AT2G27020.1	3702.AT3G22110.1	3702.AT3G26340.1	3702.AT3G27430.2	3702.AT3G51260.1	3702.AT3G53970.1	3702.AT3G60820.1	3702.AT4G31300.2	3702.AT5G35590.1	3702.AT5G42790.1 PBC1	PBG1	PBC2	AT1G79210	At2g05840	PAG1	PAC1	AT3G26340	PBB1	PAD1	AT3G53970	PBF1	PBA1	At5g35590	PAF1
KEGG ath00030 Pentose phosphate pathway 13 58 1.14 1.22e-09 3702.AT1G12000.1	3702.AT1G23190.1	3702.AT1G43670.1	3702.AT1G70730.3	3702.AT1G76550.1	3702.AT2G21330.1	3702.AT3G04790.1	3702.AT3G60750.1	3702.AT4G04040.1	3702.AT4G32840.1	3702.AT5G42740.1	3702.AT5G56630.1	3702.AT5G61410.1 AT1G12000	PGM3	FBP	PGM2	AT1G76550	FBA1	EMB3119	AT3G60750	MEE51	PFK6	AT5G42740	PFK7	RPE
KEGG ath00051 Fructose and mannose metabolism 12 64 1.06 3.51e-08 3702.AT1G12000.1	3702.AT1G17890.1	3702.AT1G43670.1	3702.AT1G76550.1	3702.AT2G21170.1	3702.AT2G21330.1	3702.AT3G51160.1	3702.AT3G55440.1	3702.AT4G04040.1	3702.AT4G32840.1	3702.AT5G51970.1	3702.AT5G56630.1 AT1G12000	At1g17890	FBP	AT1G76550	TIM	FBA1	MUR1	TPI	MEE51	PFK6	AT5G51970	PFK7
KEGG ath00400 Phenylalanine	tyrosine and tryptophan biosynthesis 10 53 1.07 6.47e-07 3702.AT1G15710.1	3702.AT1G69370.1	3702.AT3G06350.1	3702.AT3G29200.1	3702.AT3G54640.1	3702.AT4G02610.1	3702.AT4G27070.1	3702.AT5G10870.1	3702.AT5G19550.1	3702.AT5G66120.2 AT1G15710	CM3	MEE32	CM1	TSA2	AT4G02610	TSB2	CM2	ASP2	AT5G66120
KEGG ath00260 Glycine	serine and threonine metabolism 11 70 0.99 6.89e-07 3702.AT1G54100.1	3702.AT1G62810.1	3702.AT1G74920.1	3702.AT3G04520.1	3702.AT3G16950.2	3702.AT3G54640.1	3702.AT4G02610.1	3702.AT4G16155.1	3702.AT4G19710.2	3702.AT4G27070.1	3702.AT4G34200.1 ALDH7B4	CuAO1	ALDH10A8	THA2	LPD1	TSA2	AT4G02610	AT4G16155	AKHSDH2	TSB2	EDA9
KEGG ath00230 Purine metabolism 12 98 0.88 1.92e-06 3702.AT1G23190.1	3702.AT1G70730.3	3702.AT1G71750.2	3702.AT3G09820.1	3702.AT4G13720.1	3702.AT4G18440.1	3702.AT4G29680.1	3702.AT4G34890.1	3702.AT5G08570.1	3702.AT5G56350.1	3702.AT5G63310.1	3702.AT5G63680.1 PGM3	PGM2	HGPT	At3g09820	AT4G13720	AT4G18440	AT4G29680	XDH1	AT5G08570	AT5G56350	NDPK2	AT5G63680
KEGG ath00280 Valine	leucine and isoleucine degradation 9 50 1.05 3.42e-06 3702.AT1G44170.2	3702.AT1G50110.1	3702.AT1G54100.1	3702.AT1G71170.1	3702.AT3G16950.2	3702.AT3G49680.1	3702.AT4G16155.1	3702.AT4G29120.1	3702.AT5G48230.2 ALDH3H1	AT1G50110	ALDH7B4	AT1G71170	LPD1	BCAT3	AT4G16155	AT4G29120	ACAT2
KEGG ath00520 Amino sugar and nucleotide sugar metabolism 13 131 0.79 4.82e-06 3702.AT1G17890.1	3702.AT1G23190.1	3702.AT1G26570.1	3702.AT1G70730.3	3702.AT3G12500.1	3702.AT3G29360.1	3702.AT3G46440.2	3702.AT3G51160.1	3702.AT3G55260.1	3702.AT5G15490.1	3702.AT5G16510.2	3702.AT5G42740.1	3702.AT5G59290.2 At1g17890	PGM3	UGD1	PGM2	HCHIB	UGD2	UXS5	MUR1	HEXO1	UGD3	RGP5	AT5G42740	UXS3
KEGG ath03018 RNA degradation 12 110 0.83 4.92e-06 3702.AT1G03330.1	3702.AT1G55490.2	3702.AT1G76860.1	3702.AT2G25355.1	3702.AT2G29560.1	3702.AT2G36530.1	3702.AT2G43810.1	3702.AT3G07750.1	3702.AT4G27490.1	3702.AT4G32840.1	3702.AT5G44110.1	3702.AT5G56630.1 LSM2	CPN60B	LSM3B	AT2G25355	ENOC	LOS2	LSM6B	AT3G07750	RRP41L	PFK6	ABCI21	PFK7
KEGG ath00270 Cysteine and methionine metabolism 12 118 0.8 9.19e-06 3702.AT1G04410.1	3702.AT1G23820.1	3702.AT1G50110.1	3702.AT1G70310.1	3702.AT1G80360.1	3702.AT3G03780.1	3702.AT3G49680.1	3702.AT4G17260.1	3702.AT4G19710.2	3702.AT4G34200.1	3702.AT5G19550.1	3702.AT5G56760.1 c-NAD-MDH1	SPDS1	AT1G50110	SPDS2	AT1G80360	MS2	BCAT3	AT4G17260	AKHSDH2	EDA9	ASP2	SERAT1;1
KEGG ath00330 Arginine and proline metabolism 7 51 0.93 0.00026 3702.AT1G23820.1	3702.AT1G44170.2	3702.AT1G54100.1	3702.AT1G70310.1	3702.AT2G14260.1	3702.AT5G14800.1	3702.AT5G19550.1 SPDS1	ALDH3H1	ALDH7B4	SPDS2	PIP	P5CR	ASP2
KEGG ath00770 Pantothenate and CoA biosynthesis 6 34 1.04 0.00026 3702.AT1G44170.2	3702.AT1G50110.1	3702.AT3G18030.1	3702.AT3G49680.1	3702.AT4G29680.1	3702.AT5G64370.1 ALDH3H1	AT1G50110	HAL3A	BCAT3	AT4G29680	BETA-UP
KEGG ath00053 Ascorbate and aldarate metabolism 7 53 0.91 0.00030 3702.AT1G19570.1	3702.AT1G26570.1	3702.AT1G44170.2	3702.AT1G54100.1	3702.AT3G29360.1	3702.AT5G15490.1	3702.AT5G21105.1 DHAR1	UGD1	ALDH3H1	ALDH7B4	UGD2	UGD3	AT5G21105
KEGG ath00562 Inositol phosphate metabolism 8 77 0.81 0.00040 3702.AT1G31190.1	3702.AT2G21170.1	3702.AT2G22240.1	3702.AT3G55440.1	3702.AT4G39800.1	3702.AT5G16760.1	3702.AT5G63980.1	3702.AT5G63990.1 IMPL1	TIM	MIPS2	TPI	MIPS1	ITPK1	SAL1	AT5G63990
KEGG ath00052 Galactose metabolism 7 57 0.88 0.00042 3702.AT1G23190.1	3702.AT1G70730.3	3702.AT3G54440.3	3702.AT3G56310.1	3702.AT4G32840.1	3702.AT5G11720.1	3702.AT5G56630.1 PGM3	PGM2	AT3G54440	AT3G56310	PFK6	AT5G11720	PFK7
KEGG ath00350 Tyrosine metabolism 6 40 0.97 0.00049 3702.AT1G06570.1	3702.AT1G12050.1	3702.AT1G62810.1	3702.AT2G02390.3	3702.AT5G19550.1	3702.AT5G24760.1 PDS1	AT1G12050	CuAO1	GSTZ1	ASP2	AT5G24760
KEGG ath00380 Tryptophan metabolism 7 61 0.85 0.00056 3702.AT1G44170.2	3702.AT1G54100.1	3702.AT1G80360.1	3702.AT3G16950.2	3702.AT3G43600.1	3702.AT4G16155.1	3702.AT5G48230.2 ALDH3H1	ALDH7B4	AT1G80360	LPD1	AAO2	AT4G16155	ACAT2
KEGG ath00760 Nicotinate and nicotinamide metabolism 4 16 1.19 0.0013 3702.AT1G55090.1	3702.AT4G29680.1	3702.AT4G36940.1	3702.AT5G20070.1 AT1G55090	AT4G29680	NAPRT1	NUDX19
KEGG ath01210 2-Oxocarboxylic acid metabolism 7 72 0.78 0.0013 3702.AT1G50110.1	3702.AT2G37500.1	3702.AT3G49680.1	3702.AT4G13430.1	3702.AT4G17830.2	3702.AT4G35830.1	3702.AT5G19550.1 AT1G50110	AT2G37500	BCAT3	IIL1	AT4G17830	At4g35830	ASP2
KEGG ath00310 Lysine degradation 5 33 0.97 0.0016 3702.AT1G44170.2	3702.AT1G54100.1	3702.AT3G16950.2	3702.AT4G16155.1	3702.AT5G48230.2 ALDH3H1	ALDH7B4	LPD1	AT4G16155	ACAT2
KEGG ath00480 Glutathione metabolism 8 101 0.69 0.0017 3702.AT1G19570.1	3702.AT1G23820.1	3702.AT1G70310.1	3702.AT1G78380.1	3702.AT2G29450.1	3702.AT2G30860.1	3702.AT2G30870.1	3702.AT5G37830.1 DHAR1	SPDS1	SPDS2	GSTU19	GSTU5	GSTF9	GSTF10	OXP1
KEGG ath00630 Glyoxylate and dicarboxylate metabolism 7 77 0.75 0.0018 3702.AT1G04410.1	3702.AT1G67090.1	3702.AT3G16950.2	3702.AT3G25530.1	3702.AT4G16155.1	3702.AT4G35830.1	3702.AT5G48230.2 c-NAD-MDH1	RBCS1A	LPD1	GLYR1	AT4G16155	At4g35830	ACAT2
KEGG ath00511 Other glycan degradation 4 19 1.11 0.0019 3702.AT2G28100.1	3702.AT3G26720.1	3702.AT3G54440.3	3702.AT3G55260.1 FUC1	AT3G26720	AT3G54440	HEXO1
KEGG ath00500 Starch and sucrose metabolism 10 170 0.56 0.0028 3702.AT1G23190.1	3702.AT1G70730.3	3702.AT2G35840.3	3702.AT3G43190.1	3702.AT3G46970.1	3702.AT3G47000.1	3702.AT4G29680.1	3702.AT5G11720.1	3702.AT5G20830.1	3702.AT5G42740.1 PGM3	PGM2	AT2G35840	SUS4	PHS2	AT3G47000	AT4G29680	AT5G11720	SUS1	AT5G42740
KEGG ath00410 beta-Alanine metabolism 5 46 0.83 0.0053 3702.AT1G44170.2	3702.AT1G54100.1	3702.AT1G62810.1	3702.AT1G65960.2	3702.AT5G64370.1 ALDH3H1	ALDH7B4	CuAO1	GAD2	BETA-UP
KEGG ath00561 Glycerolipid metabolism 5 64 0.68 0.0195 3702.AT1G44170.2	3702.AT1G54100.1	3702.AT1G80460.1	3702.AT3G03520.1	3702.AT3G56310.1 ALDH3H1	ALDH7B4	NHO1	NPC3	AT3G56310
KEGG ath00290 Valine	leucine and isoleucine biosynthesis 3 20 0.97 0.0217 3702.AT1G50110.1	3702.AT3G49680.1	3702.AT4G13430.1 AT1G50110	BCAT3	IIL1
KEGG ath00650 Butanoate metabolism 3 20 0.97 0.0217 3702.AT1G65960.2	3702.AT3G25530.1	3702.AT5G48230.2 GAD2	GLYR1	ACAT2
KEGG ath00640 Propanoate metabolism 4 42 0.77 0.0224 3702.AT3G16950.2	3702.AT4G16155.1	3702.AT4G17260.1	3702.AT5G48230.2 LPD1	AT4G16155	AT4G17260	ACAT2
KEGG ath00920 Sulfur metabolism 4 42 0.77 0.0224 3702.AT5G04590.1	3702.AT5G56760.1	3702.AT5G63980.1	3702.AT5G63990.1 SIR	SERAT1;1	SAL1	AT5G63990
KEGG ath04070 Phosphatidylinositol signaling system 5 71 0.64 0.0255 3702.AT1G31190.1	3702.AT5G16760.1	3702.AT5G21274.1	3702.AT5G63980.1	3702.AT5G63990.1 IMPL1	ITPK1	CAM6	SAL1	AT5G63990
KEGG ath00040 Pentose and glucuronate interconversions 6 105 0.55 0.0298 3702.AT1G26570.1	3702.AT3G29360.1	3702.AT5G15490.1	3702.AT5G49650.1	3702.AT5G51970.1	3702.AT5G61410.1 UGD1	UGD2	UGD3	XK-2	AT5G51970	RPE
KEGG ath00071 Fatty acid degradation 4 47 0.72 0.0298 3702.AT1G44170.2	3702.AT1G54100.1	3702.AT5G24760.1	3702.AT5G48230.2 ALDH3H1	ALDH7B4	AT5G24760	ACAT2
KEGG ath00966 Glucosinolate biosynthesis 3 24 0.89 0.0298 3702.AT1G50110.1	3702.AT3G49680.1	3702.AT4G13430.1 AT1G50110	BCAT3	IIL1
KEGG ath00250 Alanine	aspartate and glutamate metabolism 4 51 0.69 0.0360 3702.AT1G65960.2	3702.AT4G18440.1	3702.AT5G08100.1	3702.AT5G19550.1 GAD2	AT4G18440	ASPGA1	ASP2
KEGG ath00970 Aminoacyl-tRNA biosynthesis 4 57 0.64 0.0499 3702.AT1G28350.1	3702.AT1G29880.1	3702.AT2G33840.1	3702.AT5G27470.1 AT1G28350	AT1G29880	AT2G33840	AT5G27470
WikiPathways WP2621 Glycolysis 16 37 1.43 2.64e-15 3702.AT1G04410.1	3702.AT1G12000.1	3702.AT1G13440.1	3702.AT1G53310.3	3702.AT1G76550.1	3702.AT2G29560.1	3702.AT2G36530.1	3702.AT2G42600.1	3702.AT3G14940.1	3702.AT3G55440.1	3702.AT4G04040.1	3702.AT4G32840.1	3702.AT5G08570.1	3702.AT5G42740.1	3702.AT5G56630.1	3702.AT5G63680.1 c-NAD-MDH1	AT1G12000	GAPC2	PPC1	AT1G76550	ENOC	LOS2	PPC2	PPC3	TPI	MEE51	PFK6	AT5G08570	AT5G42740	PFK7	AT5G63680
WikiPathways WP2623 Sucrose metabolism 5 14 1.34 0.00011 3702.AT1G23190.1	3702.AT1G35580.2	3702.AT1G70730.3	3702.AT3G43190.1	3702.AT5G42740.1 PGM3	CINV1	PGM2	SUS4	AT5G42740
WikiPathways WP2579 Cadmium and glutathione 4 21 1.07 0.0047 3702.AT1G19570.1	3702.AT3G52880.2	3702.AT3G56240.1	3702.AT4G25100.1 DHAR1	MDAR1	CCH	FSD1
WikiPathways WP2279 Seed development 15 350 0.42 0.0049 3702.AT1G12840.1	3702.AT1G18080.1	3702.AT1G54100.1	3702.AT1G74920.1	3702.AT2G21330.1	3702.AT2G35840.3	3702.AT3G09820.1	3702.AT3G43190.1	3702.AT3G46970.1	3702.AT4G22240.1	3702.AT4G34890.1	3702.AT5G20830.1	3702.AT5G42740.1	3702.AT5G51700.1	3702.AT5G60600.1 DET3	ATARCA	ALDH7B4	ALDH10A8	FBA1	AT2G35840	At3g09820	SUS4	PHS2	AT4G22240	XDH1	SUS1	AT5G42740	PBS2	HDS
WikiPathways WP4232 Biosynthesis of gamma-aminobutyric acid (GABA) by polyamine oxidation 2 8 1.19 0.0482 3702.AT1G62810.1	3702.AT1G74920.1 CuAO1	ALDH10A8
COMPARTMENTS GOCC:0005829 Cytosol 202 1547 0.91 5.41e-120 3702.AT1G01050.1	3702.AT1G02880.3	3702.AT1G03330.1	3702.AT1G05350.1	3702.AT1G05620.1	3702.AT1G08360.1	3702.AT1G08780.1	3702.AT1G11840.6	3702.AT1G11910.1	3702.AT1G12000.1	3702.AT1G12050.1	3702.AT1G12310.1	3702.AT1G13440.1	3702.AT1G14320.1	3702.AT1G15340.1	3702.AT1G15930.1	3702.AT1G18080.1	3702.AT1G18540.1	3702.AT1G19570.1	3702.AT1G20010.1	3702.AT1G20450.1	3702.AT1G21720.1	3702.AT1G23190.1	3702.AT1G29880.1	3702.AT1G31190.1	3702.AT1G31340.1	3702.AT1G33120.1	3702.AT1G35580.2	3702.AT1G35720.1	3702.AT1G43670.1	3702.AT1G47200.1	3702.AT1G50110.1	3702.AT1G50480.1	3702.AT1G51360.1	3702.AT1G52570.1	3702.AT1G53310.3	3702.AT1G54100.1	3702.AT1G55090.1	3702.AT1G55490.2	3702.AT1G56450.1	3702.AT1G60710.1	3702.AT1G60730.3	3702.AT1G62820.1	3702.AT1G67090.1	3702.AT1G72680.1	3702.AT1G74050.1	3702.AT1G74920.1	3702.AT1G76550.1	3702.AT1G78300.1	3702.AT1G78380.1
COMPARTMENTS GOCC:0005737 Cytoplasm 292 5597 0.51 5.44e-90 3702.AT1G01050.1	3702.AT1G02880.3	3702.AT1G03330.1	3702.AT1G04410.1	3702.AT1G05350.1	3702.AT1G05620.1	3702.AT1G08360.1	3702.AT1G08780.1	3702.AT1G09010.1	3702.AT1G11840.6	3702.AT1G11910.1	3702.AT1G12000.1	3702.AT1G12050.1	3702.AT1G12310.1	3702.AT1G12840.1	3702.AT1G12900.1	3702.AT1G13440.1	3702.AT1G14320.1	3702.AT1G15000.1	3702.AT1G15340.1	3702.AT1G15500.1	3702.AT1G15710.1	3702.AT1G15930.1	3702.AT1G17880.1	3702.AT1G18080.1	3702.AT1G18210.1	3702.AT1G18540.1	3702.AT1G19570.1	3702.AT1G20010.1	3702.AT1G20020.1	3702.AT1G20450.1	3702.AT1G21720.1	3702.AT1G23190.1	3702.AT1G23820.1	3702.AT1G29880.1	3702.AT1G31190.1	3702.AT1G31340.1	3702.AT1G32060.1	3702.AT1G32500.1	3702.AT1G33120.1	3702.AT1G35580.2	3702.AT1G35720.1	3702.AT1G42970.1	3702.AT1G43670.1	3702.AT1G44170.2	3702.AT1G47200.1	3702.AT1G47710.1	3702.AT1G50110.1	3702.AT1G50170.1	3702.AT1G50480.1
COMPARTMENTS GOCC:0005622 Intracellular 308 7410 0.41 7.94e-73 3702.AT1G01050.1	3702.AT1G02880.3	3702.AT1G03330.1	3702.AT1G04410.1	3702.AT1G05350.1	3702.AT1G05620.1	3702.AT1G08360.1	3702.AT1G08780.1	3702.AT1G09010.1	3702.AT1G11840.6	3702.AT1G11910.1	3702.AT1G12000.1	3702.AT1G12050.1	3702.AT1G12310.1	3702.AT1G12840.1	3702.AT1G12900.1	3702.AT1G13060.2	3702.AT1G13440.1	3702.AT1G14320.1	3702.AT1G15000.1	3702.AT1G15340.1	3702.AT1G15500.1	3702.AT1G15710.1	3702.AT1G15930.1	3702.AT1G17880.1	3702.AT1G18080.1	3702.AT1G18210.1	3702.AT1G18540.1	3702.AT1G19570.1	3702.AT1G20010.1	3702.AT1G20020.1	3702.AT1G20450.1	3702.AT1G21720.1	3702.AT1G23190.1	3702.AT1G23820.1	3702.AT1G29880.1	3702.AT1G31190.1	3702.AT1G31340.1	3702.AT1G32060.1	3702.AT1G32500.1	3702.AT1G33120.1	3702.AT1G35580.2	3702.AT1G35720.1	3702.AT1G42970.1	3702.AT1G43670.1	3702.AT1G44170.2	3702.AT1G47200.1	3702.AT1G47710.1	3702.AT1G50110.1	3702.AT1G50170.1
COMPARTMENTS GOCC:0110165 Cellular anatomical entity 304 8673 0.34 1.95e-53 3702.AT1G01050.1	3702.AT1G02880.3	3702.AT1G03330.1	3702.AT1G04410.1	3702.AT1G05350.1	3702.AT1G05620.1	3702.AT1G08360.1	3702.AT1G08780.1	3702.AT1G09010.1	3702.AT1G11840.6	3702.AT1G11910.1	3702.AT1G12000.1	3702.AT1G12050.1	3702.AT1G12310.1	3702.AT1G12840.1	3702.AT1G12900.1	3702.AT1G13440.1	3702.AT1G14320.1	3702.AT1G15000.1	3702.AT1G15340.1	3702.AT1G15500.1	3702.AT1G15710.1	3702.AT1G15930.1	3702.AT1G17880.1	3702.AT1G18080.1	3702.AT1G18210.1	3702.AT1G18540.1	3702.AT1G19570.1	3702.AT1G20010.1	3702.AT1G20020.1	3702.AT1G20450.1	3702.AT1G21720.1	3702.AT1G23190.1	3702.AT1G23820.1	3702.AT1G29880.1	3702.AT1G31190.1	3702.AT1G31340.1	3702.AT1G32060.1	3702.AT1G32500.1	3702.AT1G33120.1	3702.AT1G35580.2	3702.AT1G35720.1	3702.AT1G42970.1	3702.AT1G43670.1	3702.AT1G43890.1	3702.AT1G44170.2	3702.AT1G47200.1	3702.AT1G47710.1	3702.AT1G50110.1	3702.AT1G50170.1
COMPARTMENTS GOCC:0022626 Cytosolic ribosome 47 256 1.05 6.80e-30 3702.AT1G08360.1	3702.AT1G14320.1	3702.AT1G15930.1	3702.AT1G18080.1	3702.AT1G18540.1	3702.AT1G33120.1	3702.AT1G55490.2	3702.AT1G56450.1	3702.AT1G67090.1	3702.AT1G74050.1	3702.AT2G01250.1	3702.AT2G05840.1	3702.AT2G09990.1	3702.AT2G19730.3	3702.AT2G21330.1	3702.AT2G27530.1	3702.AT2G28000.1	3702.AT2G34480.1	3702.AT2G39390.1	3702.AT2G40590.1	3702.AT3G02560.2	3702.AT3G04400.1	3702.AT3G09500.1	3702.AT3G10610.1	3702.AT3G12390.1	3702.AT3G13580.3	3702.AT3G16080.1	3702.AT3G18740.1	3702.AT3G22110.1	3702.AT3G51260.1	3702.AT3G53430.1	3702.AT3G53870.1	3702.AT3G60245.1	3702.AT3G61110.1	3702.AT3G62250.1	3702.AT3G62870.1	3702.AT4G00810.1	3702.AT4G15000.1	3702.AT4G18100.1	3702.AT4G20850.1	3702.AT4G29410.1	3702.AT4G34555.1	3702.AT4G36130.1	3702.AT5G03850.1	3702.AT5G13850.1	3702.AT5G27850.1	3702.AT5G67510.1 AT1G08360	SAC52	AT1G15930	ATARCA
COMPARTMENTS GOCC:0005840 Ribosome 48 288 1.01 5.93e-29 3702.AT1G08360.1	3702.AT1G14320.1	3702.AT1G15930.1	3702.AT1G18080.1	3702.AT1G18540.1	3702.AT1G33120.1	3702.AT1G55490.2	3702.AT1G56450.1	3702.AT1G67090.1	3702.AT1G74050.1	3702.AT2G01250.1	3702.AT2G05840.1	3702.AT2G09990.1	3702.AT2G19730.3	3702.AT2G21330.1	3702.AT2G27530.1	3702.AT2G28000.1	3702.AT2G34480.1	3702.AT2G39390.1	3702.AT2G40590.1	3702.AT3G02560.2	3702.AT3G04400.1	3702.AT3G09500.1	3702.AT3G10610.1	3702.AT3G12390.1	3702.AT3G13580.3	3702.AT3G16080.1	3702.AT3G18740.1	3702.AT3G22110.1	3702.AT3G27850.1	3702.AT3G51260.1	3702.AT3G53430.1	3702.AT3G53870.1	3702.AT3G60245.1	3702.AT3G61110.1	3702.AT3G62250.1	3702.AT3G62870.1	3702.AT4G00810.1	3702.AT4G15000.1	3702.AT4G18100.1	3702.AT4G20850.1	3702.AT4G29410.1	3702.AT4G34555.1	3702.AT4G36130.1	3702.AT5G03850.1	3702.AT5G13850.1	3702.AT5G27850.1	3702.AT5G67510.1 AT1G08360	SAC52	AT1G15930
COMPARTMENTS GOCC:0043229 Intracellular organelle 212 6357 0.31 6.89e-27 3702.AT1G01050.1	3702.AT1G03330.1	3702.AT1G04410.1	3702.AT1G08360.1	3702.AT1G09010.1	3702.AT1G11840.6	3702.AT1G11910.1	3702.AT1G12310.1	3702.AT1G12840.1	3702.AT1G12900.1	3702.AT1G13440.1	3702.AT1G14320.1	3702.AT1G15000.1	3702.AT1G15340.1	3702.AT1G15500.1	3702.AT1G15710.1	3702.AT1G15930.1	3702.AT1G17880.1	3702.AT1G18080.1	3702.AT1G18210.1	3702.AT1G18540.1	3702.AT1G19570.1	3702.AT1G20010.1	3702.AT1G20020.1	3702.AT1G21720.1	3702.AT1G23190.1	3702.AT1G23820.1	3702.AT1G29880.1	3702.AT1G31190.1	3702.AT1G31340.1	3702.AT1G32060.1	3702.AT1G32500.1	3702.AT1G33120.1	3702.AT1G35580.2	3702.AT1G35720.1	3702.AT1G42970.1	3702.AT1G43670.1	3702.AT1G44170.2	3702.AT1G47200.1	3702.AT1G50170.1	3702.AT1G50480.1	3702.AT1G52570.1	3702.AT1G55490.2	3702.AT1G56450.1	3702.AT1G60690.1	3702.AT1G62820.1	3702.AT1G67090.1	3702.AT1G67280.1	3702.AT1G69370.1	3702.AT1G70410.2
COMPARTMENTS GOCC:0043226 Organelle 213 6433 0.31 1.07e-26 3702.AT1G01050.1	3702.AT1G03330.1	3702.AT1G04410.1	3702.AT1G08360.1	3702.AT1G09010.1	3702.AT1G11840.6	3702.AT1G11910.1	3702.AT1G12310.1	3702.AT1G12840.1	3702.AT1G12900.1	3702.AT1G13440.1	3702.AT1G14320.1	3702.AT1G15000.1	3702.AT1G15340.1	3702.AT1G15500.1	3702.AT1G15710.1	3702.AT1G15930.1	3702.AT1G17880.1	3702.AT1G18080.1	3702.AT1G18210.1	3702.AT1G18540.1	3702.AT1G19570.1	3702.AT1G20010.1	3702.AT1G20020.1	3702.AT1G21720.1	3702.AT1G23190.1	3702.AT1G23820.1	3702.AT1G29880.1	3702.AT1G31190.1	3702.AT1G31340.1	3702.AT1G32060.1	3702.AT1G32500.1	3702.AT1G33120.1	3702.AT1G35580.2	3702.AT1G35720.1	3702.AT1G42970.1	3702.AT1G43670.1	3702.AT1G44170.2	3702.AT1G47200.1	3702.AT1G50170.1	3702.AT1G50480.1	3702.AT1G52570.1	3702.AT1G55490.2	3702.AT1G56450.1	3702.AT1G60690.1	3702.AT1G62820.1	3702.AT1G67090.1	3702.AT1G67280.1	3702.AT1G69370.1	3702.AT1G70410.2
COMPARTMENTS GOCC:0009507 Chloroplast 92 1552 0.56 2.07e-24 3702.AT1G04410.1	3702.AT1G11840.6	3702.AT1G12840.1	3702.AT1G12900.1	3702.AT1G13440.1	3702.AT1G15500.1	3702.AT1G15710.1	3702.AT1G18080.1	3702.AT1G19570.1	3702.AT1G20010.1	3702.AT1G20020.1	3702.AT1G23820.1	3702.AT1G31190.1	3702.AT1G32060.1	3702.AT1G32500.1	3702.AT1G33120.1	3702.AT1G35720.1	3702.AT1G42970.1	3702.AT1G50170.1	3702.AT1G50480.1	3702.AT1G52570.1	3702.AT1G55490.2	3702.AT1G60690.1	3702.AT1G67090.1	3702.AT1G67280.1	3702.AT1G70410.2	3702.AT1G74920.1	3702.AT1G78380.1	3702.AT2G01250.1	3702.AT2G04700.1	3702.AT2G09990.1	3702.AT2G14260.1	3702.AT2G15570.2	3702.AT2G19730.3	3702.AT2G21170.1	3702.AT2G21330.1	3702.AT2G28000.1	3702.AT2G30860.1	3702.AT2G30870.1	3702.AT2G35490.1	3702.AT2G36530.1	3702.AT2G37500.1	3702.AT2G40300.1	3702.AT2G42600.1	3702.AT3G02560.2	3702.AT3G03780.1	3702.AT3G04790.1	3702.AT3G06350.1	3702.AT3G12290.1	3702.AT3G15360.1
COMPARTMENTS GOCC:0009536 Plastid 94 1642 0.55 5.36e-24 3702.AT1G04410.1	3702.AT1G11840.6	3702.AT1G12840.1	3702.AT1G12900.1	3702.AT1G13440.1	3702.AT1G15500.1	3702.AT1G15710.1	3702.AT1G18080.1	3702.AT1G19570.1	3702.AT1G20010.1	3702.AT1G20020.1	3702.AT1G23820.1	3702.AT1G31190.1	3702.AT1G32060.1	3702.AT1G32500.1	3702.AT1G33120.1	3702.AT1G35720.1	3702.AT1G42970.1	3702.AT1G50170.1	3702.AT1G50480.1	3702.AT1G52570.1	3702.AT1G55490.2	3702.AT1G60690.1	3702.AT1G67090.1	3702.AT1G67280.1	3702.AT1G69370.1	3702.AT1G70410.2	3702.AT1G74920.1	3702.AT1G78380.1	3702.AT2G01250.1	3702.AT2G04700.1	3702.AT2G09990.1	3702.AT2G14260.1	3702.AT2G15570.2	3702.AT2G19730.3	3702.AT2G21170.1	3702.AT2G21330.1	3702.AT2G28000.1	3702.AT2G30860.1	3702.AT2G30870.1	3702.AT2G35490.1	3702.AT2G36530.1	3702.AT2G37500.1	3702.AT2G40300.1	3702.AT2G42600.1	3702.AT3G02560.2	3702.AT3G03780.1	3702.AT3G04790.1	3702.AT3G06350.1	3702.AT3G12290.1
COMPARTMENTS GOCC:0032991 Protein-containing complex 111 2324 0.47 1.07e-22 3702.AT1G03330.1	3702.AT1G08360.1	3702.AT1G08780.1	3702.AT1G12840.1	3702.AT1G13060.2	3702.AT1G14320.1	3702.AT1G15930.1	3702.AT1G17880.1	3702.AT1G18080.1	3702.AT1G18540.1	3702.AT1G20010.1	3702.AT1G20020.1	3702.AT1G21720.1	3702.AT1G29880.1	3702.AT1G31190.1	3702.AT1G33120.1	3702.AT1G47710.1	3702.AT1G56450.1	3702.AT1G62820.1	3702.AT1G65960.2	3702.AT1G71750.2	3702.AT1G74050.1	3702.AT1G76860.1	3702.AT1G77440.1	3702.AT1G79210.2	3702.AT1G79690.1	3702.AT1G80360.1	3702.AT2G01250.1	3702.AT2G05840.1	3702.AT2G09990.1	3702.AT2G16060.1	3702.AT2G16780.1	3702.AT2G19730.3	3702.AT2G20690.1	3702.AT2G20760.1	3702.AT2G26060.1	3702.AT2G27020.1	3702.AT2G27040.2	3702.AT2G27530.1	3702.AT2G29560.1	3702.AT2G30410.2	3702.AT2G34480.1	3702.AT2G35840.3	3702.AT2G36530.1	3702.AT2G39390.1	3702.AT2G40300.1	3702.AT2G40590.1	3702.AT2G42910.1	3702.AT2G43710.1	3702.AT2G43810.1
COMPARTMENTS GOCC:0009570 Chloroplast stroma 54 597 0.75 2.90e-21 3702.AT1G04410.1	3702.AT1G12900.1	3702.AT1G19570.1	3702.AT1G20010.1	3702.AT1G20020.1	3702.AT1G31190.1	3702.AT1G32060.1	3702.AT1G32500.1	3702.AT1G35720.1	3702.AT1G42970.1	3702.AT1G55490.2	3702.AT1G67090.1	3702.AT1G67280.1	3702.AT1G78380.1	3702.AT2G04700.1	3702.AT2G15570.2	3702.AT2G21170.1	3702.AT2G21330.1	3702.AT2G28000.1	3702.AT2G30860.1	3702.AT2G35490.1	3702.AT2G37500.1	3702.AT2G40300.1	3702.AT3G04790.1	3702.AT3G06350.1	3702.AT3G15360.1	3702.AT3G16950.2	3702.AT3G23400.1	3702.AT3G27850.1	3702.AT3G49680.1	3702.AT3G54640.1	3702.AT3G55440.1	3702.AT3G55800.1	3702.AT3G60750.1	3702.AT3G63170.1	3702.AT4G12060.1	3702.AT4G13430.1	3702.AT4G16155.1	3702.AT4G19710.2	3702.AT4G22240.1	3702.AT4G25100.1	3702.AT4G27070.1	3702.AT4G34200.1	3702.AT4G37000.1	3702.AT5G04590.1	3702.AT5G04740.1	3702.AT5G06290.1	3702.AT5G08280.1	3702.AT5G10330.1	3702.AT5G42980.1
COMPARTMENTS GOCC:0044391 Ribosomal subunit 35 207 1.02 2.95e-21 3702.AT1G08360.1	3702.AT1G14320.1	3702.AT1G15930.1	3702.AT1G18540.1	3702.AT1G33120.1	3702.AT1G74050.1	3702.AT2G01250.1	3702.AT2G09990.1	3702.AT2G19730.3	3702.AT2G27530.1	3702.AT2G34480.1	3702.AT2G39390.1	3702.AT2G40590.1	3702.AT3G02560.2	3702.AT3G04400.1	3702.AT3G09500.1	3702.AT3G10610.1	3702.AT3G13580.3	3702.AT3G16080.1	3702.AT3G18740.1	3702.AT3G27850.1	3702.AT3G53430.1	3702.AT3G53870.1	3702.AT3G60245.1	3702.AT3G61110.1	3702.AT3G62250.1	3702.AT3G62870.1	3702.AT4G15000.1	3702.AT4G18100.1	3702.AT4G29410.1	3702.AT4G34555.1	3702.AT4G36130.1	3702.AT5G03850.1	3702.AT5G27850.1	3702.AT5G67510.1 AT1G08360	SAC52	AT1G15930	AT1G18540	RPL9B	AT1G74050	AT2G01250	AT2G09990	AT2G19730	PGY1	AT2G34480	AT2G39390	AT2G40590	AT3G02560	emb2171	AT3G09500
COMPARTMENTS GOCC:0009532 Plastid stroma 54 604 0.74 4.11e-21 3702.AT1G04410.1	3702.AT1G12900.1	3702.AT1G19570.1	3702.AT1G20010.1	3702.AT1G20020.1	3702.AT1G31190.1	3702.AT1G32060.1	3702.AT1G32500.1	3702.AT1G35720.1	3702.AT1G42970.1	3702.AT1G55490.2	3702.AT1G67090.1	3702.AT1G67280.1	3702.AT1G78380.1	3702.AT2G04700.1	3702.AT2G15570.2	3702.AT2G21170.1	3702.AT2G21330.1	3702.AT2G28000.1	3702.AT2G30860.1	3702.AT2G35490.1	3702.AT2G37500.1	3702.AT2G40300.1	3702.AT3G04790.1	3702.AT3G06350.1	3702.AT3G15360.1	3702.AT3G16950.2	3702.AT3G23400.1	3702.AT3G27850.1	3702.AT3G49680.1	3702.AT3G54640.1	3702.AT3G55440.1	3702.AT3G55800.1	3702.AT3G60750.1	3702.AT3G63170.1	3702.AT4G12060.1	3702.AT4G13430.1	3702.AT4G16155.1	3702.AT4G19710.2	3702.AT4G22240.1	3702.AT4G25100.1	3702.AT4G27070.1	3702.AT4G34200.1	3702.AT4G37000.1	3702.AT5G04590.1	3702.AT5G04740.1	3702.AT5G06290.1	3702.AT5G08280.1	3702.AT5G10330.1	3702.AT5G42980.1
COMPARTMENTS GOCC:0043227 Membrane-bounded organelle 190 6055 0.29 3.88e-20 3702.AT1G01050.1	3702.AT1G03330.1	3702.AT1G04410.1	3702.AT1G09010.1	3702.AT1G11840.6	3702.AT1G11910.1	3702.AT1G12310.1	3702.AT1G12840.1	3702.AT1G12900.1	3702.AT1G13440.1	3702.AT1G14320.1	3702.AT1G15000.1	3702.AT1G15340.1	3702.AT1G15500.1	3702.AT1G15710.1	3702.AT1G17880.1	3702.AT1G18080.1	3702.AT1G18210.1	3702.AT1G18540.1	3702.AT1G19570.1	3702.AT1G20010.1	3702.AT1G20020.1	3702.AT1G21720.1	3702.AT1G23190.1	3702.AT1G23820.1	3702.AT1G29880.1	3702.AT1G31190.1	3702.AT1G31340.1	3702.AT1G32060.1	3702.AT1G32500.1	3702.AT1G33120.1	3702.AT1G35580.2	3702.AT1G35720.1	3702.AT1G42970.1	3702.AT1G43670.1	3702.AT1G44170.2	3702.AT1G47200.1	3702.AT1G50170.1	3702.AT1G50480.1	3702.AT1G52570.1	3702.AT1G55490.2	3702.AT1G60690.1	3702.AT1G62820.1	3702.AT1G67090.1	3702.AT1G67280.1	3702.AT1G69370.1	3702.AT1G70410.2	3702.AT1G74920.1	3702.AT1G76860.1	3702.AT1G78300.1
COMPARTMENTS GOCC:0043231 Intracellular membrane-bounded organelle 184 5808 0.29 9.37e-20 3702.AT1G01050.1	3702.AT1G03330.1	3702.AT1G04410.1	3702.AT1G09010.1	3702.AT1G11840.6	3702.AT1G11910.1	3702.AT1G12310.1	3702.AT1G12840.1	3702.AT1G12900.1	3702.AT1G13440.1	3702.AT1G14320.1	3702.AT1G15000.1	3702.AT1G15340.1	3702.AT1G15500.1	3702.AT1G15710.1	3702.AT1G17880.1	3702.AT1G18080.1	3702.AT1G18210.1	3702.AT1G18540.1	3702.AT1G19570.1	3702.AT1G20010.1	3702.AT1G20020.1	3702.AT1G21720.1	3702.AT1G23190.1	3702.AT1G23820.1	3702.AT1G29880.1	3702.AT1G31190.1	3702.AT1G31340.1	3702.AT1G32060.1	3702.AT1G32500.1	3702.AT1G33120.1	3702.AT1G35580.2	3702.AT1G35720.1	3702.AT1G42970.1	3702.AT1G43670.1	3702.AT1G44170.2	3702.AT1G47200.1	3702.AT1G50170.1	3702.AT1G50480.1	3702.AT1G52570.1	3702.AT1G55490.2	3702.AT1G60690.1	3702.AT1G62820.1	3702.AT1G67090.1	3702.AT1G67280.1	3702.AT1G69370.1	3702.AT1G70410.2	3702.AT1G74920.1	3702.AT1G76860.1	3702.AT1G78300.1
COMPARTMENTS GOCC:1990904 Ribonucleoprotein complex 42 370 0.85 9.37e-20 3702.AT1G03330.1	3702.AT1G08360.1	3702.AT1G14320.1	3702.AT1G15930.1	3702.AT1G18080.1	3702.AT1G18540.1	3702.AT1G33120.1	3702.AT1G74050.1	3702.AT1G76860.1	3702.AT2G01250.1	3702.AT2G05840.1	3702.AT2G09990.1	3702.AT2G19730.3	3702.AT2G27040.2	3702.AT2G27530.1	3702.AT2G34480.1	3702.AT2G39390.1	3702.AT2G40590.1	3702.AT2G43810.1	3702.AT3G02560.2	3702.AT3G04400.1	3702.AT3G09500.1	3702.AT3G10610.1	3702.AT3G13580.3	3702.AT3G16080.1	3702.AT3G18740.1	3702.AT3G27850.1	3702.AT3G53430.1	3702.AT3G53870.1	3702.AT3G55620.1	3702.AT3G60245.1	3702.AT3G61110.1	3702.AT3G62250.1	3702.AT3G62870.1	3702.AT4G15000.1	3702.AT4G18100.1	3702.AT4G29410.1	3702.AT4G34555.1	3702.AT4G36130.1	3702.AT5G03850.1	3702.AT5G27850.1	3702.AT5G67510.1 LSM2	AT1G08360	SAC52	AT1G15930	ATARCA	AT1G18540	RPL9B	AT1G74050	LSM3B
COMPARTMENTS GOCC:0048046 Apoplast 33 206 1.0 1.73e-19 3702.AT1G04410.1	3702.AT1G12900.1	3702.AT1G19570.1	3702.AT1G20020.1	3702.AT1G32060.1	3702.AT1G35720.1	3702.AT1G42970.1	3702.AT1G47710.1	3702.AT1G50480.1	3702.AT1G53310.3	3702.AT1G55490.2	3702.AT1G67090.1	3702.AT2G21170.1	3702.AT2G21330.1	3702.AT2G27020.1	3702.AT2G28000.1	3702.AT2G30860.1	3702.AT2G30870.1	3702.AT2G36530.1	3702.AT2G41530.1	3702.AT2G42600.1	3702.AT3G03780.1	3702.AT3G09820.1	3702.AT3G55440.1	3702.AT3G55800.1	3702.AT4G35830.1	3702.AT5G04590.1	3702.AT5G05340.1	3702.AT5G06290.1	3702.AT5G08280.1	3702.AT5G61410.1	3702.AT5G64120.1	3702.AT5G67360.1 c-NAD-MDH1	GAPA-2	DHAR1	FNR2	PRK	ANNAT1	GAPB	SERPIN1	THFS	PPC1	CPN60B	RBCS1A	TIM	FBA1	PAG1	CPN60A	GSTF9	GSTF10
COMPARTMENTS GOCC:0005839 Proteasome core complex 16 23 1.63 2.30e-17 3702.AT1G13060.2	3702.AT1G21720.1	3702.AT1G56450.1	3702.AT1G77440.1	3702.AT1G79210.2	3702.AT2G05840.1	3702.AT2G27020.1	3702.AT3G22110.1	3702.AT3G26340.1	3702.AT3G27430.2	3702.AT3G51260.1	3702.AT3G60820.1	3702.AT4G14800.2	3702.AT4G31300.2	3702.AT5G35590.1	3702.AT5G42790.1 PBE1	PBC1	PBG1	PBC2	AT1G79210	At2g05840	PAG1	PAC1	AT3G26340	PBB1	PAD1	PBF1	PBD2	PBA1	At5g35590	PAF1
COMPARTMENTS GOCC:0022625 Cytosolic large ribosomal subunit 24 105 1.15 3.79e-17 3702.AT1G08360.1	3702.AT1G14320.1	3702.AT1G18540.1	3702.AT1G33120.1	3702.AT1G74050.1	3702.AT2G01250.1	3702.AT2G19730.3	3702.AT2G27530.1	3702.AT2G34480.1	3702.AT2G39390.1	3702.AT3G04400.1	3702.AT3G09500.1	3702.AT3G13580.3	3702.AT3G16080.1	3702.AT3G18740.1	3702.AT3G53430.1	3702.AT3G60245.1	3702.AT3G62870.1	3702.AT4G15000.1	3702.AT4G18100.1	3702.AT4G29410.1	3702.AT4G36130.1	3702.AT5G27850.1	3702.AT5G67510.1 AT1G08360	SAC52	AT1G18540	RPL9B	AT1G74050	AT2G01250	AT2G19730	PGY1	AT2G34480	AT2G39390	emb2171	AT3G09500	AT3G13580	AT3G16080	AT3G18740	AT3G53430	AT3G60245	AT3G62870	AT4G15000	AT4G18100	AT4G29410	AT4G36130	AT5G27850	AT5G67510
COMPARTMENTS GOCC:0005576 Extracellular region 40 399 0.79 3.92e-17 3702.AT1G04410.1	3702.AT1G12900.1	3702.AT1G13440.1	3702.AT1G19570.1	3702.AT1G20020.1	3702.AT1G32060.1	3702.AT1G35720.1	3702.AT1G42970.1	3702.AT1G47710.1	3702.AT1G50480.1	3702.AT1G53310.3	3702.AT1G55490.2	3702.AT1G67090.1	3702.AT1G71750.2	3702.AT1G78680.1	3702.AT2G02990.1	3702.AT2G21170.1	3702.AT2G21330.1	3702.AT2G27020.1	3702.AT2G27190.1	3702.AT2G28000.1	3702.AT2G30860.1	3702.AT2G30870.1	3702.AT2G35840.3	3702.AT2G36530.1	3702.AT2G41530.1	3702.AT2G42600.1	3702.AT3G03780.1	3702.AT3G09820.1	3702.AT3G29200.1	3702.AT3G55440.1	3702.AT3G55800.1	3702.AT4G35830.1	3702.AT5G04590.1	3702.AT5G05340.1	3702.AT5G06290.1	3702.AT5G08280.1	3702.AT5G61410.1	3702.AT5G64120.1	3702.AT5G67360.1 c-NAD-MDH1	GAPA-2	GAPC2	DHAR1	FNR2	PRK	ANNAT1	GAPB	SERPIN1	THFS	PPC1
COMPARTMENTS GOCC:0015934 Large ribosomal subunit 25 122 1.1 6.17e-17 3702.AT1G08360.1	3702.AT1G14320.1	3702.AT1G18540.1	3702.AT1G33120.1	3702.AT1G74050.1	3702.AT2G01250.1	3702.AT2G19730.3	3702.AT2G27530.1	3702.AT2G34480.1	3702.AT2G39390.1	3702.AT3G04400.1	3702.AT3G09500.1	3702.AT3G13580.3	3702.AT3G16080.1	3702.AT3G18740.1	3702.AT3G27850.1	3702.AT3G53430.1	3702.AT3G60245.1	3702.AT3G62870.1	3702.AT4G15000.1	3702.AT4G18100.1	3702.AT4G29410.1	3702.AT4G36130.1	3702.AT5G27850.1	3702.AT5G67510.1 AT1G08360	SAC52	AT1G18540	RPL9B	AT1G74050	AT2G01250	AT2G19730	PGY1	AT2G34480	AT2G39390	emb2171	AT3G09500	AT3G13580	AT3G16080	AT3G18740	RPL12-C	AT3G53430	AT3G60245	AT3G62870	AT4G15000	AT4G18100	AT4G29410	AT4G36130	AT5G27850	AT5G67510
COMPARTMENTS GOCC:0005773 Vacuole 52 737 0.64 2.57e-16 3702.AT1G04410.1	3702.AT1G09010.1	3702.AT1G11840.6	3702.AT1G11910.1	3702.AT1G12840.1	3702.AT1G14320.1	3702.AT1G15000.1	3702.AT1G18210.1	3702.AT1G19570.1	3702.AT1G20010.1	3702.AT1G21720.1	3702.AT1G33120.1	3702.AT1G35720.1	3702.AT1G44170.2	3702.AT1G78300.1	3702.AT1G78380.1	3702.AT1G78680.1	3702.AT1G79690.1	3702.AT2G01250.1	3702.AT2G27020.1	3702.AT2G28100.1	3702.AT2G30860.1	3702.AT2G30870.1	3702.AT2G34480.1	3702.AT3G01390.2	3702.AT3G03520.1	3702.AT3G12500.1	3702.AT3G14990.1	3702.AT3G22110.1	3702.AT3G25780.1	3702.AT3G26720.1	3702.AT3G43190.1	3702.AT3G51260.1	3702.AT3G55260.1	3702.AT3G55440.1	3702.AT3G56310.1	3702.AT3G62870.1	3702.AT4G12910.1	3702.AT4G14570.1	3702.AT4G16660.1	3702.AT4G20850.1	3702.AT4G35830.1	3702.AT4G36130.1	3702.AT5G06730.1	3702.AT5G10560.1	3702.AT5G19550.1	3702.AT5G20500.1	3702.AT5G24650.1	3702.AT5G27850.1	3702.AT5G35590.1
COMPARTMENTS GOCC:0009526 Plastid envelope 40 516 0.68 1.20e-13 3702.AT1G11840.6	3702.AT1G12900.1	3702.AT1G15500.1	3702.AT1G23820.1	3702.AT1G32060.1	3702.AT1G33120.1	3702.AT1G42970.1	3702.AT1G52570.1	3702.AT1G55490.2	3702.AT1G60690.1	3702.AT1G67090.1	3702.AT1G67280.1	3702.AT1G70410.2	3702.AT2G04700.1	3702.AT2G21170.1	3702.AT2G21330.1	3702.AT2G28000.1	3702.AT2G40300.1	3702.AT3G03780.1	3702.AT3G04790.1	3702.AT3G15360.1	3702.AT3G16950.2	3702.AT3G23400.1	3702.AT3G55800.1	3702.AT3G60750.1	3702.AT3G63170.1	3702.AT4G12060.1	3702.AT4G16155.1	3702.AT4G25100.1	3702.AT4G27070.1	3702.AT4G37000.1	3702.AT5G04590.1	3702.AT5G06290.1	3702.AT5G08280.1	3702.AT5G12470.1	3702.AT5G24650.1	3702.AT5G42960.1	3702.AT5G60600.1	3702.AT5G61410.1	3702.AT5G63310.1 GLX1	GAPA-2	ATNTT2	SPDS1	PRK	RPL9B	GAPB	PLDALPHA2	CPN60B	AT1G60690	RBCS1A
COMPARTMENTS GOCC:0009941 Chloroplast envelope 38 493 0.68 7.02e-13 3702.AT1G11840.6	3702.AT1G12900.1	3702.AT1G15500.1	3702.AT1G23820.1	3702.AT1G32060.1	3702.AT1G33120.1	3702.AT1G42970.1	3702.AT1G52570.1	3702.AT1G55490.2	3702.AT1G60690.1	3702.AT1G67090.1	3702.AT1G70410.2	3702.AT2G04700.1	3702.AT2G21170.1	3702.AT2G21330.1	3702.AT2G28000.1	3702.AT2G40300.1	3702.AT3G03780.1	3702.AT3G04790.1	3702.AT3G15360.1	3702.AT3G16950.2	3702.AT3G23400.1	3702.AT3G55800.1	3702.AT3G60750.1	3702.AT3G63170.1	3702.AT4G12060.1	3702.AT4G16155.1	3702.AT4G25100.1	3702.AT4G27070.1	3702.AT4G37000.1	3702.AT5G04590.1	3702.AT5G08280.1	3702.AT5G12470.1	3702.AT5G24650.1	3702.AT5G42960.1	3702.AT5G60600.1	3702.AT5G61410.1	3702.AT5G63310.1 GLX1	GAPA-2	ATNTT2	SPDS1	PRK	RPL9B	GAPB	PLDALPHA2	CPN60B	AT1G60690	RBCS1A	BCA4	AT2G04700
COMPARTMENTS GOCC:0000502 Proteasome complex 16 57 1.24 1.43e-12 3702.AT1G13060.2	3702.AT1G21720.1	3702.AT1G56450.1	3702.AT1G77440.1	3702.AT1G79210.2	3702.AT2G05840.1	3702.AT2G27020.1	3702.AT3G22110.1	3702.AT3G26340.1	3702.AT3G27430.2	3702.AT3G51260.1	3702.AT3G60820.1	3702.AT4G14800.2	3702.AT4G31300.2	3702.AT5G35590.1	3702.AT5G42790.1 PBE1	PBC1	PBG1	PBC2	AT1G79210	At2g05840	PAG1	PAC1	AT3G26340	PBB1	PAD1	PBF1	PBD2	PBA1	At5g35590	PAF1
COMPARTMENTS GOCC:0043232 Intracellular non-membrane-bounded organelle 58 1148 0.49 3.15e-12 3702.AT1G08360.1	3702.AT1G13440.1	3702.AT1G14320.1	3702.AT1G15930.1	3702.AT1G18080.1	3702.AT1G18540.1	3702.AT1G20010.1	3702.AT1G33120.1	3702.AT1G55490.2	3702.AT1G56450.1	3702.AT1G62820.1	3702.AT1G67090.1	3702.AT1G74050.1	3702.AT2G01250.1	3702.AT2G05840.1	3702.AT2G09990.1	3702.AT2G19730.3	3702.AT2G21330.1	3702.AT2G27040.2	3702.AT2G27530.1	3702.AT2G28000.1	3702.AT2G34480.1	3702.AT2G39390.1	3702.AT2G40590.1	3702.AT3G02560.2	3702.AT3G04400.1	3702.AT3G09500.1	3702.AT3G10610.1	3702.AT3G12390.1	3702.AT3G13580.3	3702.AT3G16080.1	3702.AT3G16950.2	3702.AT3G18060.1	3702.AT3G18740.1	3702.AT3G22110.1	3702.AT3G27850.1	3702.AT3G51260.1	3702.AT3G53430.1	3702.AT3G53870.1	3702.AT3G55620.1	3702.AT3G60245.1	3702.AT3G61110.1	3702.AT3G62250.1	3702.AT3G62870.1	3702.AT4G00810.1	3702.AT4G15000.1	3702.AT4G18100.1	3702.AT4G20850.1	3702.AT4G29410.1	3702.AT4G34555.1
COMPARTMENTS GOCC:0005911 Cell-cell junction 43 667 0.6 3.62e-12 3702.AT1G04410.1	3702.AT1G08360.1	3702.AT1G11910.1	3702.AT1G13440.1	3702.AT1G18540.1	3702.AT1G20450.1	3702.AT1G33120.1	3702.AT1G35720.1	3702.AT1G44170.2	3702.AT1G74050.1	3702.AT2G09990.1	3702.AT2G16060.1	3702.AT2G19730.3	3702.AT2G25060.1	3702.AT2G29450.1	3702.AT2G30860.1	3702.AT2G35840.3	3702.AT2G36530.1	3702.AT2G42600.1	3702.AT2G42910.1	3702.AT2G45820.1	3702.AT3G03520.1	3702.AT3G03780.1	3702.AT3G09500.1	3702.AT3G09820.1	3702.AT3G12390.1	3702.AT3G14990.1	3702.AT3G18740.1	3702.AT3G53870.1	3702.AT3G55440.1	3702.AT3G58600.1	3702.AT3G61110.1	3702.AT4G29410.1	3702.AT4G35830.1	3702.AT5G13850.1	3702.AT5G16510.2	3702.AT5G19550.1	3702.AT5G20830.1	3702.AT5G27850.1	3702.AT5G37830.1	3702.AT5G38480.1	3702.AT5G42980.1	3702.AT5G51970.1 c-NAD-MDH1	AT1G08360	APA1	GAPC2	AT1G18540	ERD10	RPL9B	ANNAT1
COMPARTMENTS GOCC:0043228 Non-membrane-bounded organelle 58 1155 0.49 3.75e-12 3702.AT1G08360.1	3702.AT1G13440.1	3702.AT1G14320.1	3702.AT1G15930.1	3702.AT1G18080.1	3702.AT1G18540.1	3702.AT1G20010.1	3702.AT1G33120.1	3702.AT1G55490.2	3702.AT1G56450.1	3702.AT1G62820.1	3702.AT1G67090.1	3702.AT1G74050.1	3702.AT2G01250.1	3702.AT2G05840.1	3702.AT2G09990.1	3702.AT2G19730.3	3702.AT2G21330.1	3702.AT2G27040.2	3702.AT2G27530.1	3702.AT2G28000.1	3702.AT2G34480.1	3702.AT2G39390.1	3702.AT2G40590.1	3702.AT3G02560.2	3702.AT3G04400.1	3702.AT3G09500.1	3702.AT3G10610.1	3702.AT3G12390.1	3702.AT3G13580.3	3702.AT3G16080.1	3702.AT3G16950.2	3702.AT3G18060.1	3702.AT3G18740.1	3702.AT3G22110.1	3702.AT3G27850.1	3702.AT3G51260.1	3702.AT3G53430.1	3702.AT3G53870.1	3702.AT3G55620.1	3702.AT3G60245.1	3702.AT3G61110.1	3702.AT3G62250.1	3702.AT3G62870.1	3702.AT4G00810.1	3702.AT4G15000.1	3702.AT4G18100.1	3702.AT4G20850.1	3702.AT4G29410.1	3702.AT4G34555.1
COMPARTMENTS GOCC:0070161 Anchoring junction 43 670 0.6 3.90e-12 3702.AT1G04410.1	3702.AT1G08360.1	3702.AT1G11910.1	3702.AT1G13440.1	3702.AT1G18540.1	3702.AT1G20450.1	3702.AT1G33120.1	3702.AT1G35720.1	3702.AT1G44170.2	3702.AT1G74050.1	3702.AT2G09990.1	3702.AT2G16060.1	3702.AT2G19730.3	3702.AT2G25060.1	3702.AT2G29450.1	3702.AT2G30860.1	3702.AT2G35840.3	3702.AT2G36530.1	3702.AT2G42600.1	3702.AT2G42910.1	3702.AT2G45820.1	3702.AT3G03520.1	3702.AT3G03780.1	3702.AT3G09500.1	3702.AT3G09820.1	3702.AT3G12390.1	3702.AT3G14990.1	3702.AT3G18740.1	3702.AT3G53870.1	3702.AT3G55440.1	3702.AT3G58600.1	3702.AT3G61110.1	3702.AT4G29410.1	3702.AT4G35830.1	3702.AT5G13850.1	3702.AT5G16510.2	3702.AT5G19550.1	3702.AT5G20830.1	3702.AT5G27850.1	3702.AT5G37830.1	3702.AT5G38480.1	3702.AT5G42980.1	3702.AT5G51970.1 c-NAD-MDH1	AT1G08360	APA1	GAPC2	AT1G18540	ERD10	RPL9B	ANNAT1
COMPARTMENTS GOCC:1905369 Endopeptidase complex 16 63 1.2 4.50e-12 3702.AT1G13060.2	3702.AT1G21720.1	3702.AT1G56450.1	3702.AT1G77440.1	3702.AT1G79210.2	3702.AT2G05840.1	3702.AT2G27020.1	3702.AT3G22110.1	3702.AT3G26340.1	3702.AT3G27430.2	3702.AT3G51260.1	3702.AT3G60820.1	3702.AT4G14800.2	3702.AT4G31300.2	3702.AT5G35590.1	3702.AT5G42790.1 PBE1	PBC1	PBG1	PBC2	AT1G79210	At2g05840	PAG1	PAC1	AT3G26340	PBB1	PAD1	PBF1	PBD2	PBA1	At5g35590	PAF1
COMPARTMENTS GOCC:0042788 Polysomal ribosome 18 92 1.08 6.21e-12 3702.AT1G08360.1	3702.AT1G14320.1	3702.AT1G15930.1	3702.AT1G18080.1	3702.AT2G01250.1	3702.AT2G05840.1	3702.AT2G09990.1	3702.AT2G27530.1	3702.AT2G34480.1	3702.AT3G13580.3	3702.AT3G18740.1	3702.AT3G53870.1	3702.AT3G61110.1	3702.AT3G62870.1	3702.AT4G15000.1	3702.AT4G18100.1	3702.AT4G36130.1	3702.AT5G67510.1 AT1G08360	SAC52	AT1G15930	ATARCA	AT2G01250	At2g05840	AT2G09990	PGY1	AT2G34480	AT3G13580	AT3G18740	AT3G53870	RS27A	AT3G62870	AT4G15000	AT4G18100	AT4G36130	AT5G67510
COMPARTMENTS GOCC:0030054 Cell junction 43 687 0.59 7.87e-12 3702.AT1G04410.1	3702.AT1G08360.1	3702.AT1G11910.1	3702.AT1G13440.1	3702.AT1G18540.1	3702.AT1G20450.1	3702.AT1G33120.1	3702.AT1G35720.1	3702.AT1G44170.2	3702.AT1G74050.1	3702.AT2G09990.1	3702.AT2G16060.1	3702.AT2G19730.3	3702.AT2G25060.1	3702.AT2G29450.1	3702.AT2G30860.1	3702.AT2G35840.3	3702.AT2G36530.1	3702.AT2G42600.1	3702.AT2G42910.1	3702.AT2G45820.1	3702.AT3G03520.1	3702.AT3G03780.1	3702.AT3G09500.1	3702.AT3G09820.1	3702.AT3G12390.1	3702.AT3G14990.1	3702.AT3G18740.1	3702.AT3G53870.1	3702.AT3G55440.1	3702.AT3G58600.1	3702.AT3G61110.1	3702.AT4G29410.1	3702.AT4G35830.1	3702.AT5G13850.1	3702.AT5G16510.2	3702.AT5G19550.1	3702.AT5G20830.1	3702.AT5G27850.1	3702.AT5G37830.1	3702.AT5G38480.1	3702.AT5G42980.1	3702.AT5G51970.1 c-NAD-MDH1	AT1G08360	APA1	GAPC2	AT1G18540	ERD10	RPL9B	ANNAT1
COMPARTMENTS GOCC:0009506 Plasmodesma 42 660 0.59 8.84e-12 3702.AT1G04410.1	3702.AT1G08360.1	3702.AT1G11910.1	3702.AT1G13440.1	3702.AT1G18540.1	3702.AT1G20450.1	3702.AT1G33120.1	3702.AT1G35720.1	3702.AT1G44170.2	3702.AT1G74050.1	3702.AT2G09990.1	3702.AT2G16060.1	3702.AT2G19730.3	3702.AT2G25060.1	3702.AT2G29450.1	3702.AT2G30860.1	3702.AT2G35840.3	3702.AT2G36530.1	3702.AT2G42600.1	3702.AT2G42910.1	3702.AT2G45820.1	3702.AT3G03520.1	3702.AT3G03780.1	3702.AT3G09500.1	3702.AT3G09820.1	3702.AT3G12390.1	3702.AT3G14990.1	3702.AT3G18740.1	3702.AT3G53870.1	3702.AT3G55440.1	3702.AT3G61110.1	3702.AT4G29410.1	3702.AT4G35830.1	3702.AT5G13850.1	3702.AT5G16510.2	3702.AT5G19550.1	3702.AT5G20830.1	3702.AT5G27850.1	3702.AT5G37830.1	3702.AT5G38480.1	3702.AT5G42980.1	3702.AT5G51970.1 c-NAD-MDH1	AT1G08360	APA1	GAPC2	AT1G18540	ERD10	RPL9B	ANNAT1	ALDH3H1
COMPARTMENTS GOCC:0055044 Symplast 42 660 0.59 8.84e-12 3702.AT1G04410.1	3702.AT1G08360.1	3702.AT1G11910.1	3702.AT1G13440.1	3702.AT1G18540.1	3702.AT1G20450.1	3702.AT1G33120.1	3702.AT1G35720.1	3702.AT1G44170.2	3702.AT1G74050.1	3702.AT2G09990.1	3702.AT2G16060.1	3702.AT2G19730.3	3702.AT2G25060.1	3702.AT2G29450.1	3702.AT2G30860.1	3702.AT2G35840.3	3702.AT2G36530.1	3702.AT2G42600.1	3702.AT2G42910.1	3702.AT2G45820.1	3702.AT3G03520.1	3702.AT3G03780.1	3702.AT3G09500.1	3702.AT3G09820.1	3702.AT3G12390.1	3702.AT3G14990.1	3702.AT3G18740.1	3702.AT3G53870.1	3702.AT3G55440.1	3702.AT3G61110.1	3702.AT4G29410.1	3702.AT4G35830.1	3702.AT5G13850.1	3702.AT5G16510.2	3702.AT5G19550.1	3702.AT5G20830.1	3702.AT5G27850.1	3702.AT5G37830.1	3702.AT5G38480.1	3702.AT5G42980.1	3702.AT5G51970.1 c-NAD-MDH1	AT1G08360	APA1	GAPC2	AT1G18540	ERD10	RPL9B	ANNAT1	ALDH3H1
COMPARTMENTS GOCC:0005844 Polysome 18 97 1.06 1.22e-11 3702.AT1G08360.1	3702.AT1G14320.1	3702.AT1G15930.1	3702.AT1G18080.1	3702.AT2G01250.1	3702.AT2G05840.1	3702.AT2G09990.1	3702.AT2G27530.1	3702.AT2G34480.1	3702.AT3G13580.3	3702.AT3G18740.1	3702.AT3G53870.1	3702.AT3G61110.1	3702.AT3G62870.1	3702.AT4G15000.1	3702.AT4G18100.1	3702.AT4G36130.1	3702.AT5G67510.1 AT1G08360	SAC52	AT1G15930	ATARCA	AT2G01250	At2g05840	AT2G09990	PGY1	AT2G34480	AT3G13580	AT3G18740	AT3G53870	RS27A	AT3G62870	AT4G15000	AT4G18100	AT4G36130	AT5G67510
COMPARTMENTS GOCC:0071944 Cell periphery 81 2096 0.38 1.90e-11 3702.AT1G04410.1	3702.AT1G08360.1	3702.AT1G11840.6	3702.AT1G12000.1	3702.AT1G12310.1	3702.AT1G12840.1	3702.AT1G13440.1	3702.AT1G18210.1	3702.AT1G18540.1	3702.AT1G19570.1	3702.AT1G20010.1	3702.AT1G23190.1	3702.AT1G31340.1	3702.AT1G33120.1	3702.AT1G35580.2	3702.AT1G35720.1	3702.AT1G43890.1	3702.AT1G47200.1	3702.AT1G50480.1	3702.AT1G55490.2	3702.AT1G60690.1	3702.AT1G70310.1	3702.AT1G70410.2	3702.AT1G74050.1	3702.AT1G74920.1	3702.AT1G76860.1	3702.AT1G78300.1	3702.AT1G78380.1	3702.AT2G01250.1	3702.AT2G02990.1	3702.AT2G09990.1	3702.AT2G16060.1	3702.AT2G19730.3	3702.AT2G20760.1	3702.AT2G25060.1	3702.AT2G29450.1	3702.AT2G30860.1	3702.AT2G30870.1	3702.AT2G34480.1	3702.AT2G36530.1	3702.AT2G42600.1	3702.AT2G42910.1	3702.AT2G43710.1	3702.AT2G45820.1	3702.AT3G01390.2	3702.AT3G01520.1	3702.AT3G03780.1	3702.AT3G09820.1	3702.AT3G14990.1	3702.AT3G15360.1
COMPARTMENTS GOCC:1905368 Peptidase complex 16 79 1.1 7.44e-11 3702.AT1G13060.2	3702.AT1G21720.1	3702.AT1G56450.1	3702.AT1G77440.1	3702.AT1G79210.2	3702.AT2G05840.1	3702.AT2G27020.1	3702.AT3G22110.1	3702.AT3G26340.1	3702.AT3G27430.2	3702.AT3G51260.1	3702.AT3G60820.1	3702.AT4G14800.2	3702.AT4G31300.2	3702.AT5G35590.1	3702.AT5G42790.1 PBE1	PBC1	PBG1	PBC2	AT1G79210	At2g05840	PAG1	PAC1	AT3G26340	PBB1	PAD1	PBF1	PBD2	PBA1	At5g35590	PAF1
COMPARTMENTS GOCC:0005886 Plasma membrane 70 1733 0.4 1.31e-10 3702.AT1G04410.1	3702.AT1G08360.1	3702.AT1G11840.6	3702.AT1G12310.1	3702.AT1G12840.1	3702.AT1G13440.1	3702.AT1G18210.1	3702.AT1G18540.1	3702.AT1G19570.1	3702.AT1G20010.1	3702.AT1G23190.1	3702.AT1G31340.1	3702.AT1G33120.1	3702.AT1G35580.2	3702.AT1G35720.1	3702.AT1G43890.1	3702.AT1G47200.1	3702.AT1G50480.1	3702.AT1G55490.2	3702.AT1G60690.1	3702.AT1G70310.1	3702.AT1G70410.2	3702.AT1G74050.1	3702.AT1G76860.1	3702.AT1G78300.1	3702.AT1G78380.1	3702.AT2G01250.1	3702.AT2G02990.1	3702.AT2G16060.1	3702.AT2G19730.3	3702.AT2G20760.1	3702.AT2G25060.1	3702.AT2G29450.1	3702.AT2G30860.1	3702.AT2G30870.1	3702.AT2G34480.1	3702.AT2G36530.1	3702.AT2G42600.1	3702.AT2G42910.1	3702.AT2G43710.1	3702.AT2G45820.1	3702.AT3G01390.2	3702.AT3G01520.1	3702.AT3G03780.1	3702.AT3G09820.1	3702.AT3G14990.1	3702.AT3G17210.1	3702.AT3G18740.1	3702.AT3G23400.1	3702.AT3G25780.1
COMPARTMENTS GOCC:0019774 Proteasome core complex	beta-subunit complex 9 11 1.7 2.69e-10 3702.AT1G13060.2	3702.AT1G21720.1	3702.AT1G56450.1	3702.AT1G77440.1	3702.AT3G26340.1	3702.AT3G27430.2	3702.AT3G60820.1	3702.AT4G14800.2	3702.AT4G31300.2 PBE1	PBC1	PBG1	PBC2	AT3G26340	PBB1	PBF1	PBD2	PBA1
COMPARTMENTS GOCC:0031967 Organelle envelope 43 785 0.53 4.03e-10 3702.AT1G11840.6	3702.AT1G12900.1	3702.AT1G15500.1	3702.AT1G23820.1	3702.AT1G31190.1	3702.AT1G32060.1	3702.AT1G33120.1	3702.AT1G42970.1	3702.AT1G47200.1	3702.AT1G52570.1	3702.AT1G55490.2	3702.AT1G60690.1	3702.AT1G67090.1	3702.AT1G67280.1	3702.AT1G70410.2	3702.AT2G04700.1	3702.AT2G21170.1	3702.AT2G21330.1	3702.AT2G28000.1	3702.AT2G36530.1	3702.AT2G40300.1	3702.AT3G03780.1	3702.AT3G04790.1	3702.AT3G15360.1	3702.AT3G16950.2	3702.AT3G23400.1	3702.AT3G55800.1	3702.AT3G60750.1	3702.AT3G63170.1	3702.AT4G12060.1	3702.AT4G16155.1	3702.AT4G25100.1	3702.AT4G27070.1	3702.AT4G37000.1	3702.AT5G04590.1	3702.AT5G06290.1	3702.AT5G08280.1	3702.AT5G12470.1	3702.AT5G24650.1	3702.AT5G42960.1	3702.AT5G60600.1	3702.AT5G61410.1	3702.AT5G63310.1 GLX1	GAPA-2	ATNTT2	SPDS1	IMPL1	PRK	RPL9B	GAPB
COMPARTMENTS GOCC:0031975 Envelope 43 788 0.53 4.41e-10 3702.AT1G11840.6	3702.AT1G12900.1	3702.AT1G15500.1	3702.AT1G23820.1	3702.AT1G31190.1	3702.AT1G32060.1	3702.AT1G33120.1	3702.AT1G42970.1	3702.AT1G47200.1	3702.AT1G52570.1	3702.AT1G55490.2	3702.AT1G60690.1	3702.AT1G67090.1	3702.AT1G67280.1	3702.AT1G70410.2	3702.AT2G04700.1	3702.AT2G21170.1	3702.AT2G21330.1	3702.AT2G28000.1	3702.AT2G36530.1	3702.AT2G40300.1	3702.AT3G03780.1	3702.AT3G04790.1	3702.AT3G15360.1	3702.AT3G16950.2	3702.AT3G23400.1	3702.AT3G55800.1	3702.AT3G60750.1	3702.AT3G63170.1	3702.AT4G12060.1	3702.AT4G16155.1	3702.AT4G25100.1	3702.AT4G27070.1	3702.AT4G37000.1	3702.AT5G04590.1	3702.AT5G06290.1	3702.AT5G08280.1	3702.AT5G12470.1	3702.AT5G24650.1	3702.AT5G42960.1	3702.AT5G60600.1	3702.AT5G61410.1	3702.AT5G63310.1 GLX1	GAPA-2	ATNTT2	SPDS1	IMPL1	PRK	RPL9B	GAPB
COMPARTMENTS GOCC:0016020 Membrane 97 3056 0.29 3.48e-09 3702.AT1G04410.1	3702.AT1G08360.1	3702.AT1G11840.6	3702.AT1G12310.1	3702.AT1G12840.1	3702.AT1G13440.1	3702.AT1G14320.1	3702.AT1G18210.1	3702.AT1G18540.1	3702.AT1G19570.1	3702.AT1G20010.1	3702.AT1G20020.1	3702.AT1G20450.1	3702.AT1G21720.1	3702.AT1G23190.1	3702.AT1G31190.1	3702.AT1G31340.1	3702.AT1G32060.1	3702.AT1G33120.1	3702.AT1G35580.2	3702.AT1G35720.1	3702.AT1G42970.1	3702.AT1G43890.1	3702.AT1G47200.1	3702.AT1G50480.1	3702.AT1G55490.2	3702.AT1G60690.1	3702.AT1G67090.1	3702.AT1G70310.1	3702.AT1G70410.2	3702.AT1G74050.1	3702.AT1G76860.1	3702.AT1G78300.1	3702.AT1G78380.1	3702.AT2G01250.1	3702.AT2G02990.1	3702.AT2G16060.1	3702.AT2G19730.3	3702.AT2G20760.1	3702.AT2G25060.1	3702.AT2G27020.1	3702.AT2G29450.1	3702.AT2G30860.1	3702.AT2G30870.1	3702.AT2G34480.1	3702.AT2G35490.1	3702.AT2G36530.1	3702.AT2G42600.1	3702.AT2G42910.1	3702.AT2G43710.1
COMPARTMENTS GOCC:0099503 Secretory vesicle 18 151 0.87 7.41e-09 3702.AT1G11840.6	3702.AT1G11910.1	3702.AT1G21720.1	3702.AT2G14260.1	3702.AT2G25060.1	3702.AT2G28100.1	3702.AT3G10850.1	3702.AT3G12500.1	3702.AT3G26720.1	3702.AT3G29360.1	3702.AT3G55260.1	3702.AT3G56310.1	3702.AT4G16660.1	3702.AT4G34180.1	3702.AT5G20500.1	3702.AT5G55730.1	3702.AT5G64120.1	3702.AT5G67360.1 GLX1	APA1	PBC1	PIP	ENODL14	FUC1	GLY2	HCHIB	AT3G26720	UGD2	HEXO1	AT3G56310	AT4G16660	AT4G34180	AT5G20500	FLA1	AT5G64120	ARA12
COMPARTMENTS GOCC:0005774 Vacuolar membrane 27 440 0.58 2.89e-07 3702.AT1G04410.1	3702.AT1G12840.1	3702.AT1G14320.1	3702.AT1G20010.1	3702.AT1G21720.1	3702.AT1G33120.1	3702.AT1G35720.1	3702.AT1G78300.1	3702.AT1G78380.1	3702.AT2G01250.1	3702.AT2G27020.1	3702.AT2G34480.1	3702.AT3G01390.2	3702.AT3G12500.1	3702.AT3G14990.1	3702.AT3G25780.1	3702.AT3G26720.1	3702.AT3G51260.1	3702.AT3G55440.1	3702.AT3G62870.1	3702.AT4G16660.1	3702.AT4G20850.1	3702.AT5G06730.1	3702.AT5G10560.1	3702.AT5G19550.1	3702.AT5G24650.1	3702.AT5G35590.1 c-NAD-MDH1	DET3	SAC52	TUB5	PBC1	RPL9B	ANNAT1	GF14	GSTU19	AT2G01250	PAG1	AT2G34480	VMA10	HCHIB	DJ1A	AOC3	AT3G26720	PAD1	TPI	AT3G62870	AT4G16660	TPP2	AT5G06730	AT5G10560
COMPARTMENTS GOCC:0019773 Proteasome core complex	alpha-subunit complex 7 12 1.56 2.89e-07 3702.AT1G79210.2	3702.AT2G05840.1	3702.AT2G27020.1	3702.AT3G22110.1	3702.AT3G51260.1	3702.AT5G35590.1	3702.AT5G42790.1 AT1G79210	At2g05840	PAG1	PAC1	PAD1	At5g35590	PAF1
COMPARTMENTS GOCC:0005618 Cell wall 24 418 0.55 5.91e-06 3702.AT1G12000.1	3702.AT1G13440.1	3702.AT1G20010.1	3702.AT1G35720.1	3702.AT1G74920.1	3702.AT2G01250.1	3702.AT2G09990.1	3702.AT2G16060.1	3702.AT2G19730.3	3702.AT2G30870.1	3702.AT3G15360.1	3702.AT3G55440.1	3702.AT3G61110.1	3702.AT5G03850.1	3702.AT5G05340.1	3702.AT5G14800.1	3702.AT5G15490.1	3702.AT5G16050.1	3702.AT5G19550.1	3702.AT5G38480.1	3702.AT5G42980.1	3702.AT5G55730.1	3702.AT5G64120.1	3702.AT5G67360.1 AT1G12000	GAPC2	TUB5	ANNAT1	ALDH10A8	AT2G01250	AT2G09990	HB1	AT2G19730	GSTF10	TRX-M4	TPI	RS27A	AT3G10090	PRX52	P5CR	UGD3	At5g16050	ASP2	RCI1A	TRX3	FLA1	AT5G64120	ARA12
COMPARTMENTS GOCC:1902494 Catalytic complex 36 856 0.41 1.02e-05 3702.AT1G13060.2	3702.AT1G21720.1	3702.AT1G56450.1	3702.AT1G65960.2	3702.AT1G77440.1	3702.AT1G79210.2	3702.AT2G05840.1	3702.AT2G16780.1	3702.AT2G20690.1	3702.AT2G27020.1	3702.AT2G29560.1	3702.AT2G36530.1	3702.AT2G42910.1	3702.AT3G06540.1	3702.AT3G18030.1	3702.AT3G18060.1	3702.AT3G22110.1	3702.AT3G26340.1	3702.AT3G27430.2	3702.AT3G51260.1	3702.AT3G55260.1	3702.AT3G59380.1	3702.AT3G60820.1	3702.AT4G05420.1	3702.AT4G13430.1	3702.AT4G14800.2	3702.AT4G27490.1	3702.AT4G31300.2	3702.AT5G14530.1	3702.AT5G35590.1	3702.AT5G42790.1	3702.AT5G49980.1	3702.AT5G55160.2	3702.AT5G56350.1	3702.AT5G56760.1	3702.AT5G59160.2 PBE1	PBC1	PBG1	GAD2	PBC2	AT1G79210	At2g05840	MSI2	AT2G20690	PAG1	ENOC	LOS2	AT2G42910	REP	HAL3A
COMPARTMENTS GOCC:0030312 External encapsulating structure 24 438 0.53 1.26e-05 3702.AT1G12000.1	3702.AT1G13440.1	3702.AT1G20010.1	3702.AT1G35720.1	3702.AT1G74920.1	3702.AT2G01250.1	3702.AT2G09990.1	3702.AT2G16060.1	3702.AT2G19730.3	3702.AT2G30870.1	3702.AT3G15360.1	3702.AT3G55440.1	3702.AT3G61110.1	3702.AT5G03850.1	3702.AT5G05340.1	3702.AT5G14800.1	3702.AT5G15490.1	3702.AT5G16050.1	3702.AT5G19550.1	3702.AT5G38480.1	3702.AT5G42980.1	3702.AT5G55730.1	3702.AT5G64120.1	3702.AT5G67360.1 AT1G12000	GAPC2	TUB5	ANNAT1	ALDH10A8	AT2G01250	AT2G09990	HB1	AT2G19730	GSTF10	TRX-M4	TPI	RS27A	AT3G10090	PRX52	P5CR	UGD3	At5g16050	ASP2	RCI1A	TRX3	FLA1	AT5G64120	ARA12
COMPARTMENTS GOCC:0022627 Cytosolic small ribosomal subunit 10 77 0.9 3.13e-05 3702.AT1G15930.1	3702.AT2G09990.1	3702.AT2G40590.1	3702.AT3G02560.2	3702.AT3G10610.1	3702.AT3G53870.1	3702.AT3G61110.1	3702.AT3G62250.1	3702.AT4G34555.1	3702.AT5G03850.1 AT1G15930	AT2G09990	AT2G40590	AT3G02560	AT3G10610	AT3G53870	RS27A	UBQ5	AT4G34555	AT3G10090
COMPARTMENTS GOCC:0098805 Whole membrane 29 661 0.43 6.08e-05 3702.AT1G04410.1	3702.AT1G12840.1	3702.AT1G14320.1	3702.AT1G20010.1	3702.AT1G21720.1	3702.AT1G33120.1	3702.AT1G35720.1	3702.AT1G47200.1	3702.AT1G78300.1	3702.AT1G78380.1	3702.AT2G01250.1	3702.AT2G27020.1	3702.AT2G34480.1	3702.AT3G01390.2	3702.AT3G12500.1	3702.AT3G14990.1	3702.AT3G25780.1	3702.AT3G26720.1	3702.AT3G51260.1	3702.AT3G55440.1	3702.AT3G62870.1	3702.AT4G16660.1	3702.AT4G20850.1	3702.AT5G06730.1	3702.AT5G10560.1	3702.AT5G19550.1	3702.AT5G24650.1	3702.AT5G35590.1	3702.AT5G42960.1 c-NAD-MDH1	DET3	SAC52	TUB5	PBC1	RPL9B	ANNAT1	WPP2	GF14	GSTU19	AT2G01250	PAG1	AT2G34480	VMA10	HCHIB	DJ1A	AOC3	AT3G26720	PAD1	TPI	AT3G62870	AT4G16660
COMPARTMENTS GOCC:0015935 Small ribosomal subunit 10 86 0.86 7.47e-05 3702.AT1G15930.1	3702.AT2G09990.1	3702.AT2G40590.1	3702.AT3G02560.2	3702.AT3G10610.1	3702.AT3G53870.1	3702.AT3G61110.1	3702.AT3G62250.1	3702.AT4G34555.1	3702.AT5G03850.1 AT1G15930	AT2G09990	AT2G40590	AT3G02560	AT3G10610	AT3G53870	RS27A	UBQ5	AT4G34555	AT3G10090
COMPARTMENTS GOCC:0009579 Thylakoid 22 422 0.51 7.50e-05 3702.AT1G20020.1	3702.AT1G32060.1	3702.AT1G35720.1	3702.AT1G42970.1	3702.AT1G67090.1	3702.AT1G67280.1	3702.AT2G21170.1	3702.AT2G21330.1	3702.AT2G28000.1	3702.AT2G30860.1	3702.AT2G35490.1	3702.AT3G04790.1	3702.AT3G15360.1	3702.AT3G23400.1	3702.AT3G27850.1	3702.AT3G55800.1	3702.AT4G22240.1	3702.AT4G25100.1	3702.AT4G37000.1	3702.AT5G04740.1	3702.AT5G61410.1	3702.AT5G63310.1 FNR2	PRK	ANNAT1	GAPB	RBCS1A	AT1G67280	TIM	FBA1	CPN60A	GSTF9	AT2G35490	EMB3119	TRX-M4	FIB4	RPL12-C	SBPASE	AT4G22240	FSD1	ACD2	ACR12	RPE	NDPK2
COMPARTMENTS GOCC:0010319 Stromule 7 34 1.1 7.94e-05 3702.AT1G32060.1	3702.AT1G42970.1	3702.AT1G55490.2	3702.AT1G67280.1	3702.AT5G04590.1	3702.AT5G06290.1	3702.AT5G61410.1 PRK	GAPB	CPN60B	AT1G67280	SIR	At5g06290	RPE
COMPARTMENTS GOCC:0098588 Bounding membrane of organelle 29 706 0.4 0.00019 3702.AT1G04410.1	3702.AT1G12840.1	3702.AT1G14320.1	3702.AT1G20010.1	3702.AT1G21720.1	3702.AT1G33120.1	3702.AT1G35720.1	3702.AT1G47200.1	3702.AT1G78300.1	3702.AT1G78380.1	3702.AT2G01250.1	3702.AT2G27020.1	3702.AT2G34480.1	3702.AT3G01390.2	3702.AT3G12500.1	3702.AT3G14990.1	3702.AT3G25780.1	3702.AT3G26720.1	3702.AT3G51260.1	3702.AT3G55440.1	3702.AT3G62870.1	3702.AT4G16660.1	3702.AT4G20850.1	3702.AT5G06730.1	3702.AT5G10560.1	3702.AT5G19550.1	3702.AT5G24650.1	3702.AT5G35590.1	3702.AT5G42960.1 c-NAD-MDH1	DET3	SAC52	TUB5	PBC1	RPL9B	ANNAT1	WPP2	GF14	GSTU19	AT2G01250	PAG1	AT2G34480	VMA10	HCHIB	DJ1A	AOC3	AT3G26720	PAD1	TPI	AT3G62870	AT4G16660
COMPARTMENTS GOCC:0016272 Prefoldin complex 3 4 1.67 0.0029 3702.AT1G08780.1	3702.AT5G23290.1	3702.AT5G49510.1 AIP3	PFD5	PFD3
COMPARTMENTS GOCC:0031090 Organelle membrane 33 1041 0.29 0.0059 3702.AT1G04410.1	3702.AT1G12840.1	3702.AT1G14320.1	3702.AT1G20010.1	3702.AT1G21720.1	3702.AT1G31190.1	3702.AT1G33120.1	3702.AT1G35720.1	3702.AT1G47200.1	3702.AT1G78300.1	3702.AT1G78380.1	3702.AT2G01250.1	3702.AT2G27020.1	3702.AT2G34480.1	3702.AT3G01390.2	3702.AT3G12500.1	3702.AT3G14990.1	3702.AT3G25780.1	3702.AT3G26720.1	3702.AT3G51260.1	3702.AT3G55440.1	3702.AT3G62870.1	3702.AT4G16660.1	3702.AT4G20850.1	3702.AT4G25100.1	3702.AT4G33090.1	3702.AT5G06730.1	3702.AT5G10560.1	3702.AT5G12470.1	3702.AT5G19550.1	3702.AT5G24650.1	3702.AT5G35590.1	3702.AT5G42960.1 c-NAD-MDH1	DET3	SAC52	TUB5	PBC1	IMPL1	RPL9B	ANNAT1	WPP2	GF14	GSTU19	AT2G01250	PAG1	AT2G34480	VMA10	HCHIB	DJ1A	AOC3
COMPARTMENTS GOCC:0005688 U6 snRNP 3 8 1.36 0.0127 3702.AT1G03330.1	3702.AT1G76860.1	3702.AT2G43810.1 LSM2	LSM3B	LSM6B
COMPARTMENTS GOCC:0031410 Cytoplasmic vesicle 20 548 0.35 0.0184 3702.AT1G11840.6	3702.AT1G11910.1	3702.AT1G21720.1	3702.AT1G29880.1	3702.AT2G14260.1	3702.AT2G25060.1	3702.AT2G28100.1	3702.AT3G10850.1	3702.AT3G12500.1	3702.AT3G26720.1	3702.AT3G29360.1	3702.AT3G55260.1	3702.AT3G56310.1	3702.AT4G16660.1	3702.AT4G34180.1	3702.AT5G20500.1	3702.AT5G55730.1	3702.AT5G64120.1	3702.AT5G66120.2	3702.AT5G67360.1 GLX1	APA1	PBC1	AT1G29880	PIP	ENODL14	FUC1	GLY2	HCHIB	AT3G26720	UGD2	HEXO1	AT3G56310	AT4G16660	AT4G34180	AT5G20500	FLA1	AT5G64120	AT5G66120	ARA12
COMPARTMENTS GOCC:0097708 Intracellular vesicle 20 549 0.35 0.0185 3702.AT1G11840.6	3702.AT1G11910.1	3702.AT1G21720.1	3702.AT1G29880.1	3702.AT2G14260.1	3702.AT2G25060.1	3702.AT2G28100.1	3702.AT3G10850.1	3702.AT3G12500.1	3702.AT3G26720.1	3702.AT3G29360.1	3702.AT3G55260.1	3702.AT3G56310.1	3702.AT4G16660.1	3702.AT4G34180.1	3702.AT5G20500.1	3702.AT5G55730.1	3702.AT5G64120.1	3702.AT5G66120.2	3702.AT5G67360.1 GLX1	APA1	PBC1	AT1G29880	PIP	ENODL14	FUC1	GLY2	HCHIB	AT3G26720	UGD2	HEXO1	AT3G56310	AT4G16660	AT4G34180	AT5G20500	FLA1	AT5G64120	AT5G66120	ARA12
COMPARTMENTS GOCC:0031982 Vesicle 20 575 0.33 0.0310 3702.AT1G11840.6	3702.AT1G11910.1	3702.AT1G21720.1	3702.AT1G29880.1	3702.AT2G14260.1	3702.AT2G25060.1	3702.AT2G28100.1	3702.AT3G10850.1	3702.AT3G12500.1	3702.AT3G26720.1	3702.AT3G29360.1	3702.AT3G55260.1	3702.AT3G56310.1	3702.AT4G16660.1	3702.AT4G34180.1	3702.AT5G20500.1	3702.AT5G55730.1	3702.AT5G64120.1	3702.AT5G66120.2	3702.AT5G67360.1 GLX1	APA1	PBC1	AT1G29880	PIP	ENODL14	FUC1	GLY2	HCHIB	AT3G26720	UGD2	HEXO1	AT3G56310	AT4G16660	AT4G34180	AT5G20500	FLA1	AT5G64120	AT5G66120	ARA12
COMPARTMENTS GOCC:0005777 Peroxisome 10 192 0.51 0.0311 3702.AT1G11840.6	3702.AT1G13440.1	3702.AT1G19570.1	3702.AT2G28000.1	3702.AT2G29450.1	3702.AT2G30860.1	3702.AT2G30870.1	3702.AT3G52880.2	3702.AT4G12910.1	3702.AT5G48230.2 GLX1	GAPC2	DHAR1	CPN60A	GSTU5	GSTF9	GSTF10	MDAR1	scpl20	ACAT2
COMPARTMENTS GOCC:0042579 Microbody 10 192 0.51 0.0311 3702.AT1G11840.6	3702.AT1G13440.1	3702.AT1G19570.1	3702.AT2G28000.1	3702.AT2G29450.1	3702.AT2G30860.1	3702.AT2G30870.1	3702.AT3G52880.2	3702.AT4G12910.1	3702.AT5G48230.2 GLX1	GAPC2	DHAR1	CPN60A	GSTU5	GSTF9	GSTF10	MDAR1	scpl20	ACAT2
COMPARTMENTS GOCC:0009535 Chloroplast thylakoid membrane 12 264 0.45 0.0326 3702.AT1G20020.1	3702.AT1G32060.1	3702.AT1G42970.1	3702.AT1G67090.1	3702.AT2G35490.1	3702.AT3G04790.1	3702.AT3G15360.1	3702.AT3G23400.1	3702.AT3G27850.1	3702.AT4G22240.1	3702.AT4G37000.1	3702.AT5G04740.1 FNR2	PRK	GAPB	RBCS1A	AT2G35490	EMB3119	TRX-M4	FIB4	RPL12-C	AT4G22240	ACD2	ACR12
COMPARTMENTS GOCC:0005634 Nucleus 58 2411 0.17 0.0351 3702.AT1G01050.1	3702.AT1G03330.1	3702.AT1G04410.1	3702.AT1G12310.1	3702.AT1G13440.1	3702.AT1G14320.1	3702.AT1G15340.1	3702.AT1G17880.1	3702.AT1G18080.1	3702.AT1G23190.1	3702.AT1G31340.1	3702.AT1G33120.1	3702.AT1G35580.2	3702.AT1G43670.1	3702.AT1G47200.1	3702.AT1G62820.1	3702.AT1G76860.1	3702.AT2G18230.1	3702.AT2G19730.3	3702.AT2G27020.1	3702.AT2G27040.2	3702.AT2G29560.1	3702.AT2G34260.1	3702.AT2G34480.1	3702.AT2G35840.3	3702.AT2G36530.1	3702.AT2G43810.1	3702.AT3G02540.1	3702.AT3G04400.1	3702.AT3G09500.1	3702.AT3G13235.1	3702.AT3G14990.1	3702.AT3G16950.2	3702.AT3G23400.1	3702.AT3G29360.1	3702.AT3G51260.1	3702.AT3G53620.1	3702.AT3G53970.1	3702.AT3G55620.1	3702.AT4G00810.1	3702.AT4G05420.1	3702.AT4G11740.1	3702.AT4G14570.1	3702.AT4G18100.1	3702.AT4G26840.1	3702.AT4G27490.1	3702.AT4G29510.1	3702.AT4G39800.1	3702.AT5G02770.1	3702.AT5G11950.1
COMPARTMENTS GOCC:0055035 Plastid thylakoid membrane 12 269 0.44 0.0367 3702.AT1G20020.1	3702.AT1G32060.1	3702.AT1G42970.1	3702.AT1G67090.1	3702.AT2G35490.1	3702.AT3G04790.1	3702.AT3G15360.1	3702.AT3G23400.1	3702.AT3G27850.1	3702.AT4G22240.1	3702.AT4G37000.1	3702.AT5G04740.1 FNR2	PRK	GAPB	RBCS1A	AT2G35490	EMB3119	TRX-M4	FIB4	RPL12-C	AT4G22240	ACD2	ACR12
COMPARTMENTS GOCC:0000015 Phosphopyruvate hydratase complex 2 3 1.61 0.0448 3702.AT2G29560.1	3702.AT2G36530.1 ENOC	LOS2
UniProt Keywords KW-0963 Cytoplasm 135 1870 0.65 1.73e-46 3702.AT1G01050.1	3702.AT1G02880.3	3702.AT1G03330.1	3702.AT1G04410.1	3702.AT1G05620.1	3702.AT1G06570.1	3702.AT1G12000.1	3702.AT1G13060.2	3702.AT1G13440.1	3702.AT1G14320.1	3702.AT1G18080.1	3702.AT1G19570.1	3702.AT1G20010.1	3702.AT1G21720.1	3702.AT1G23190.1	3702.AT1G28350.1	3702.AT1G29880.1	3702.AT1G31340.1	3702.AT1G35160.2	3702.AT1G35580.2	3702.AT1G35720.1	3702.AT1G43670.1	3702.AT1G47200.1	3702.AT1G47710.1	3702.AT1G50110.1	3702.AT1G51360.1	3702.AT1G52570.1	3702.AT1G53310.3	3702.AT1G56450.1	3702.AT1G70730.3	3702.AT1G71750.2	3702.AT1G76550.1	3702.AT1G76860.1	3702.AT1G77440.1	3702.AT1G78300.1	3702.AT1G78380.1	3702.AT1G79210.2	3702.AT1G79260.1	3702.AT1G80360.1	3702.AT1G80460.1	3702.AT2G02390.3	3702.AT2G03800.1	3702.AT2G05840.1	3702.AT2G14260.1	3702.AT2G17420.1	3702.AT2G18230.1	3702.AT2G19730.3	3702.AT2G22240.1	3702.AT2G26060.1	3702.AT2G27020.1
UniProt Keywords KW-0007 Acetylation 60 840 0.64 1.35e-18 3702.AT1G11840.6	3702.AT1G15500.1	3702.AT1G15930.1	3702.AT1G17890.1	3702.AT1G18210.1	3702.AT1G20450.1	3702.AT1G28350.1	3702.AT1G29880.1	3702.AT1G31190.1	3702.AT1G35160.2	3702.AT1G35580.2	3702.AT1G35720.1	3702.AT1G43890.1	3702.AT1G69800.2	3702.AT1G70310.1	3702.AT1G70410.2	3702.AT1G76860.1	3702.AT1G80360.1	3702.AT2G24940.1	3702.AT2G27020.1	3702.AT2G29560.1	3702.AT2G37500.1	3702.AT2G41530.1	3702.AT2G42690.1	3702.AT2G42910.1	3702.AT2G43710.1	3702.AT3G01390.2	3702.AT3G02560.2	3702.AT3G02770.1	3702.AT3G04790.1	3702.AT3G12490.2	3702.AT3G16050.1	3702.AT3G25530.1	3702.AT3G29200.1	3702.AT3G53970.1	3702.AT3G56240.1	3702.AT3G60750.1	3702.AT4G09670.1	3702.AT4G11740.1	3702.AT4G14800.2	3702.AT4G25100.1	3702.AT4G27070.1	3702.AT4G29120.1	3702.AT4G32840.1	3702.AT4G35830.1	3702.AT4G36910.1	3702.AT4G38510.5	3702.AT5G01410.1	3702.AT5G16450.2	3702.AT5G16760.1
UniProt Keywords KW-0888 Threonine protease 16 25 1.6 1.48e-16 3702.AT1G13060.2	3702.AT1G21720.1	3702.AT1G56450.1	3702.AT1G77440.1	3702.AT1G79210.2	3702.AT2G05840.1	3702.AT2G27020.1	3702.AT3G22110.1	3702.AT3G26340.1	3702.AT3G27430.2	3702.AT3G51260.1	3702.AT3G60820.1	3702.AT4G14800.2	3702.AT4G31300.2	3702.AT5G35590.1	3702.AT5G42790.1 PBE1	PBC1	PBG1	PBC2	AT1G79210	At2g05840	PAG1	PAC1	AT3G26340	PBB1	PAD1	PBF1	PBD2	PBA1	At5g35590	PAF1
UniProt Keywords KW-0689 Ribosomal protein 39 385 0.8 1.59e-16 3702.AT1G08360.1	3702.AT1G14320.1	3702.AT1G15930.1	3702.AT1G18080.1	3702.AT1G18540.1	3702.AT1G33120.1	3702.AT1G74050.1	3702.AT2G01250.1	3702.AT2G09990.1	3702.AT2G19730.3	3702.AT2G27530.1	3702.AT2G27720.2	3702.AT2G34480.1	3702.AT2G39390.1	3702.AT2G40590.1	3702.AT2G44120.2	3702.AT3G02560.2	3702.AT3G07110.2	3702.AT3G09500.1	3702.AT3G10610.1	3702.AT3G13580.3	3702.AT3G16080.1	3702.AT3G18740.1	3702.AT3G27850.1	3702.AT3G52580.1	3702.AT3G53430.1	3702.AT3G53870.1	3702.AT3G60245.1	3702.AT3G61110.1	3702.AT3G62250.1	3702.AT3G62870.1	3702.AT4G00810.1	3702.AT4G15000.1	3702.AT4G18100.1	3702.AT4G29410.1	3702.AT4G34555.1	3702.AT4G36130.1	3702.AT5G27850.1	3702.AT5G67510.1 AT1G08360	SAC52	AT1G15930	ATARCA	AT1G18540	RPL9B	AT1G74050	AT2G01250	AT2G09990	AT2G19730	PGY1	AT2G27720
UniProt Keywords KW-0687 Ribonucleoprotein 43 495 0.73 3.98e-16 3702.AT1G03330.1	3702.AT1G08360.1	3702.AT1G14320.1	3702.AT1G15930.1	3702.AT1G18080.1	3702.AT1G18540.1	3702.AT1G33120.1	3702.AT1G74050.1	3702.AT1G76860.1	3702.AT2G01250.1	3702.AT2G09990.1	3702.AT2G19730.3	3702.AT2G27040.2	3702.AT2G27530.1	3702.AT2G27720.2	3702.AT2G34480.1	3702.AT2G39390.1	3702.AT2G40590.1	3702.AT2G43810.1	3702.AT2G44120.2	3702.AT3G02560.2	3702.AT3G07110.2	3702.AT3G09500.1	3702.AT3G10610.1	3702.AT3G13580.3	3702.AT3G16080.1	3702.AT3G18740.1	3702.AT3G27850.1	3702.AT3G52580.1	3702.AT3G53430.1	3702.AT3G53870.1	3702.AT3G60245.1	3702.AT3G61110.1	3702.AT3G62250.1	3702.AT3G62870.1	3702.AT4G00810.1	3702.AT4G15000.1	3702.AT4G18100.1	3702.AT4G29410.1	3702.AT4G34555.1	3702.AT4G36130.1	3702.AT5G27850.1	3702.AT5G67510.1 LSM2	AT1G08360	SAC52	AT1G15930	ATARCA	AT1G18540	RPL9B	AT1G74050
UniProt Keywords KW-0456 Lyase 35 368 0.77 3.88e-14 3702.AT1G11840.6	3702.AT1G50170.1	3702.AT1G53310.3	3702.AT1G65960.2	3702.AT1G67090.1	3702.AT1G67280.1	3702.AT1G70410.2	3702.AT2G02990.1	3702.AT2G21330.1	3702.AT2G29560.1	3702.AT2G35450.1	3702.AT2G36530.1	3702.AT2G42600.1	3702.AT3G02720.1	3702.AT3G02770.1	3702.AT3G04520.1	3702.AT3G06350.1	3702.AT3G14940.1	3702.AT3G16850.1	3702.AT3G18030.1	3702.AT3G23490.1	3702.AT3G46440.2	3702.AT3G51160.1	3702.AT3G54640.1	3702.AT3G60880.2	3702.AT4G02610.1	3702.AT4G13430.1	3702.AT4G18440.1	3702.AT4G27070.1	3702.AT4G35830.1	3702.AT5G01410.1	3702.AT5G16450.2	3702.AT5G19150.1	3702.AT5G59290.2	3702.AT5G66120.2 GLX1	SIRB	PPC1	GAD2	RBCS1A	AT1G67280	BCA4	RNS1	FBA1	ENOC	AT2G35450	LOS2	PPC2	DJ1D	AT3G02770	THA2
UniProt Keywords KW-0560 Oxidoreductase 62 1168 0.52 6.67e-14 3702.AT1G04410.1	3702.AT1G06570.1	3702.AT1G11840.6	3702.AT1G12900.1	3702.AT1G13440.1	3702.AT1G15710.1	3702.AT1G17890.1	3702.AT1G19570.1	3702.AT1G20020.1	3702.AT1G26570.1	3702.AT1G30510.2	3702.AT1G42970.1	3702.AT1G44170.2	3702.AT1G54100.1	3702.AT1G60690.1	3702.AT1G60710.1	3702.AT1G60730.3	3702.AT1G62810.1	3702.AT1G67090.1	3702.AT1G71170.1	3702.AT1G72680.1	3702.AT1G74920.1	3702.AT1G78380.1	3702.AT2G02390.3	3702.AT2G04700.1	3702.AT2G17420.1	3702.AT2G27150.2	3702.AT2G30860.1	3702.AT2G40300.1	3702.AT2G43710.1	3702.AT3G06350.1	3702.AT3G12290.1	3702.AT3G16950.2	3702.AT3G25530.1	3702.AT3G29360.1	3702.AT3G43600.1	3702.AT3G52880.2	3702.AT4G05390.1	3702.AT4G09670.1	3702.AT4G16155.1	3702.AT4G17260.1	3702.AT4G19710.2	3702.AT4G25100.1	3702.AT4G29120.1	3702.AT4G34200.1	3702.AT4G34890.1	3702.AT4G37000.1	3702.AT5G04590.1	3702.AT5G05340.1	3702.AT5G06060.1
UniProt Keywords KW-0647 Proteasome 18 69 1.21 1.28e-13 3702.AT1G13060.2	3702.AT1G21720.1	3702.AT1G48170.1	3702.AT1G56450.1	3702.AT1G77440.1	3702.AT1G79210.2	3702.AT2G05840.1	3702.AT2G27020.1	3702.AT3G22110.1	3702.AT3G26340.1	3702.AT3G27430.2	3702.AT3G51260.1	3702.AT3G53970.1	3702.AT3G60820.1	3702.AT4G14800.2	3702.AT4G31300.2	3702.AT5G35590.1	3702.AT5G42790.1 PBE1	PBC1	AT1G48170	PBG1	PBC2	AT1G79210	At2g05840	PAG1	PAC1	AT3G26340	PBB1	PAD1	AT3G53970	PBF1	PBD2	PBA1	At5g35590	PAF1
UniProt Keywords KW-0520 NAD 29 267 0.83 4.02e-13 3702.AT1G04410.1	3702.AT1G13440.1	3702.AT1G26570.1	3702.AT1G44170.2	3702.AT1G54100.1	3702.AT1G55090.1	3702.AT1G71170.1	3702.AT1G74920.1	3702.AT2G22240.1	3702.AT2G27150.2	3702.AT3G16950.2	3702.AT3G25530.1	3702.AT3G29360.1	3702.AT3G43600.1	3702.AT3G46440.2	3702.AT3G52880.2	3702.AT4G16155.1	3702.AT4G17260.1	3702.AT4G29120.1	3702.AT4G34200.1	3702.AT4G34890.1	3702.AT4G39800.1	3702.AT5G15490.1	3702.AT5G19150.1	3702.AT5G20070.1	3702.AT5G24760.1	3702.AT5G51970.1	3702.AT5G59290.2	3702.AT5G66120.2 c-NAD-MDH1	GAPC2	UGD1	ALDH3H1	ALDH7B4	AT1G55090	AT1G71170	ALDH10A8	MIPS2	AAO3	LPD1	GLYR1	UGD2	AAO2	UXS5	MDAR1	AT4G16155	AT4G17260	AT4G29120	EDA9	XDH1	MIPS1
UniProt Keywords KW-0150 Chloroplast 65 1516 0.42 1.08e-10 3702.AT1G12900.1	3702.AT1G15500.1	3702.AT1G15710.1	3702.AT1G20020.1	3702.AT1G30510.2	3702.AT1G31190.1	3702.AT1G32060.1	3702.AT1G32500.1	3702.AT1G42970.1	3702.AT1G50170.1	3702.AT1G55490.2	3702.AT1G67090.1	3702.AT1G67280.1	3702.AT1G69370.1	3702.AT1G74920.1	3702.AT2G04700.1	3702.AT2G15570.2	3702.AT2G21170.1	3702.AT2G21330.1	3702.AT2G28000.1	3702.AT2G35490.1	3702.AT2G37500.1	3702.AT2G40300.1	3702.AT2G43710.1	3702.AT3G04790.1	3702.AT3G06350.1	3702.AT3G15360.1	3702.AT3G16950.2	3702.AT3G23400.1	3702.AT3G25780.1	3702.AT3G27850.1	3702.AT3G29200.1	3702.AT3G49680.1	3702.AT3G54640.1	3702.AT3G55800.1	3702.AT3G60750.1	3702.AT3G60880.2	3702.AT3G63170.1	3702.AT4G05390.1	3702.AT4G08790.1	3702.AT4G12060.1	3702.AT4G13430.1	3702.AT4G16155.1	3702.AT4G19710.2	3702.AT4G22240.1	3702.AT4G25100.1	3702.AT4G27070.1	3702.AT4G34200.1	3702.AT4G36910.1	3702.AT4G37000.1
UniProt Keywords KW-0028 Amino-acid biosynthesis 20 147 0.92 1.19e-10 3702.AT1G15710.1	3702.AT1G50110.1	3702.AT1G69370.1	3702.AT2G37500.1	3702.AT3G03780.1	3702.AT3G06350.1	3702.AT3G29200.1	3702.AT3G49680.1	3702.AT3G54640.1	3702.AT3G60880.2	3702.AT4G02610.1	3702.AT4G13430.1	3702.AT4G17830.2	3702.AT4G19710.2	3702.AT4G27070.1	3702.AT5G10870.1	3702.AT5G14800.1	3702.AT5G21060.2	3702.AT5G56760.1	3702.AT5G66120.2 AT1G15710	AT1G50110	CM3	AT2G37500	MS2	MEE32	CM1	BCAT3	TSA2	DHDPS1	AT4G02610	IIL1	AT4G17830	AKHSDH2	TSB2	CM2	P5CR	AT5G21060	SERAT1;1	AT5G66120
UniProt Keywords KW-0378 Hydrolase 89 2520 0.34 1.45e-10 3702.AT1G01050.1	3702.AT1G02170.1	3702.AT1G05620.1	3702.AT1G09010.1	3702.AT1G11360.3	3702.AT1G11910.1	3702.AT1G12050.1	3702.AT1G13060.2	3702.AT1G15000.1	3702.AT1G21720.1	3702.AT1G31190.1	3702.AT1G35580.2	3702.AT1G43670.1	3702.AT1G52160.1	3702.AT1G52570.1	3702.AT1G56450.1	3702.AT1G77440.1	3702.AT1G78680.1	3702.AT1G79210.2	3702.AT1G79690.1	3702.AT2G02990.1	3702.AT2G03800.1	3702.AT2G05840.1	3702.AT2G14260.1	3702.AT2G18230.1	3702.AT2G21620.2	3702.AT2G22570.1	3702.AT2G22970.3	3702.AT2G27020.1	3702.AT2G27190.1	3702.AT2G28100.1	3702.AT2G35450.1	3702.AT2G35840.3	3702.AT2G41530.1	3702.AT2G42690.1	3702.AT3G03520.1	3702.AT3G10850.1	3702.AT3G12290.1	3702.AT3G12500.1	3702.AT3G13235.1	3702.AT3G16850.1	3702.AT3G16990.1	3702.AT3G22110.1	3702.AT3G23600.1	3702.AT3G26340.1	3702.AT3G26720.1	3702.AT3G27430.2	3702.AT3G47000.1	3702.AT3G51260.1	3702.AT3G53620.1
UniProt Keywords KW-0460 Magnesium 38 603 0.59 1.58e-10 3702.AT1G01050.1	3702.AT1G12000.1	3702.AT1G12050.1	3702.AT1G23190.1	3702.AT1G31190.1	3702.AT1G43670.1	3702.AT1G52160.1	3702.AT1G53310.3	3702.AT1G70730.3	3702.AT1G71750.2	3702.AT1G76550.1	3702.AT1G79690.1	3702.AT2G18230.1	3702.AT2G29560.1	3702.AT2G35840.3	3702.AT2G36530.1	3702.AT2G42600.1	3702.AT2G42910.1	3702.AT3G09820.1	3702.AT3G14940.1	3702.AT3G17210.1	3702.AT3G53620.1	3702.AT3G55800.1	3702.AT3G60750.1	3702.AT4G04040.1	3702.AT4G13720.1	3702.AT4G32840.1	3702.AT4G36940.1	3702.AT5G08570.1	3702.AT5G16760.1	3702.AT5G20070.1	3702.AT5G27450.2	3702.AT5G56350.1	3702.AT5G56630.1	3702.AT5G63310.1	3702.AT5G63680.1	3702.AT5G63980.1	3702.AT5G63990.1 PPa1	AT1G12000	AT1G12050	PGM3	IMPL1	FBP	TRZ3	PPC1	PGM2	HGPT	AT1G76550	NUDT3	PPa2
UniProt Keywords KW-0025 Alternative splicing 99 3019 0.31 3.83e-10 3702.AT1G02880.3	3702.AT1G05620.1	3702.AT1G06570.1	3702.AT1G11840.6	3702.AT1G12900.1	3702.AT1G13060.2	3702.AT1G13440.1	3702.AT1G14320.1	3702.AT1G15340.1	3702.AT1G17890.1	3702.AT1G18080.1	3702.AT1G19570.1	3702.AT1G20020.1	3702.AT1G20450.1	3702.AT1G21720.1	3702.AT1G23820.1	3702.AT1G30510.2	3702.AT1G35160.2	3702.AT1G35580.2	3702.AT1G44170.2	3702.AT1G60730.3	3702.AT1G65960.2	3702.AT1G67090.1	3702.AT1G67280.1	3702.AT1G69800.2	3702.AT1G70410.2	3702.AT1G70730.3	3702.AT1G74920.1	3702.AT1G78680.1	3702.AT1G79690.1	3702.AT1G80460.1	3702.AT2G01250.1	3702.AT2G02390.3	3702.AT2G05840.1	3702.AT2G14260.1	3702.AT2G15570.2	3702.AT2G21170.1	3702.AT2G21330.1	3702.AT2G22240.1	3702.AT2G22475.1	3702.AT2G22570.1	3702.AT2G22970.3	3702.AT2G24390.1	3702.AT2G26060.1	3702.AT2G30860.1	3702.AT2G34260.1	3702.AT2G37500.1	3702.AT2G42590.3	3702.AT2G42690.1	3702.AT2G43710.1
UniProt Keywords KW-0324 Glycolysis 14 62 1.14 4.55e-10 3702.AT1G12000.1	3702.AT1G13440.1	3702.AT1G76550.1	3702.AT2G21330.1	3702.AT2G29560.1	3702.AT2G36530.1	3702.AT3G55440.1	3702.AT4G04040.1	3702.AT4G32840.1	3702.AT5G08570.1	3702.AT5G42740.1	3702.AT5G56350.1	3702.AT5G56630.1	3702.AT5G63680.1 AT1G12000	GAPC2	AT1G76550	FBA1	ENOC	LOS2	TPI	MEE51	PFK6	AT5G08570	AT5G42740	AT5G56350	PFK7	AT5G63680
UniProt Keywords KW-0645 Protease 33 497 0.61 9.69e-10 3702.AT1G02170.1	3702.AT1G11910.1	3702.AT1G13060.2	3702.AT1G15000.1	3702.AT1G21720.1	3702.AT1G56450.1	3702.AT1G77440.1	3702.AT1G79210.2	3702.AT2G05840.1	3702.AT2G14260.1	3702.AT2G22970.3	3702.AT2G27020.1	3702.AT3G13235.1	3702.AT3G22110.1	3702.AT3G26340.1	3702.AT3G27430.2	3702.AT3G51260.1	3702.AT3G60820.1	3702.AT3G61540.1	3702.AT4G12910.1	3702.AT4G14800.2	3702.AT4G20430.1	3702.AT4G20850.1	3702.AT4G31300.2	3702.AT4G33090.1	3702.AT4G36195.3	3702.AT5G08100.1	3702.AT5G13520.1	3702.AT5G35590.1	3702.AT5G42790.1	3702.AT5G60160.1	3702.AT5G67360.1	3702.ATCG00670.1 MC1	APA1	PBE1	scpl50	PBC1	PBG1	PBC2	AT1G79210	At2g05840	PIP	SCPL11	PAG1	DDI1	PAC1	AT3G26340	PBB1	PAD1	PBF1
UniProt Keywords KW-0021 Allosteric enzyme 12 43 1.24 1.42e-09 3702.AT1G12000.1	3702.AT1G53310.3	3702.AT1G69370.1	3702.AT1G76550.1	3702.AT2G42600.1	3702.AT3G14940.1	3702.AT3G29200.1	3702.AT3G46970.1	3702.AT3G60880.2	3702.AT4G04040.1	3702.AT4G32840.1	3702.AT5G56630.1 AT1G12000	PPC1	CM3	AT1G76550	PPC2	PPC3	CM1	PHS2	DHDPS1	MEE51	PFK6	PFK7
UniProt Keywords KW-0521 NADP 24 281 0.72 4.20e-09 3702.AT1G12900.1	3702.AT1G15710.1	3702.AT1G17890.1	3702.AT1G20020.1	3702.AT1G30510.2	3702.AT1G42970.1	3702.AT1G60690.1	3702.AT1G60710.1	3702.AT1G60730.3	3702.AT1G72680.1	3702.AT2G17420.1	3702.AT3G06350.1	3702.AT3G12290.1	3702.AT3G25530.1	3702.AT3G51160.1	3702.AT3G52880.2	3702.AT4G05390.1	3702.AT4G19710.2	3702.AT4G37000.1	3702.AT5G06060.1	3702.AT5G14800.1	3702.AT5G16970.1	3702.AT5G19150.1	3702.AT5G21060.2 GAPA-2	AT1G15710	At1g17890	FNR2	RFNR2	GAPB	AT1G60690	ATB2	AT1G60730	CADG	NTRA	MEE32	AT3G12290	GLYR1	MUR1	MDAR1	RFNR1	AKHSDH2	ACD2	AT5G06060	P5CR	AER	AT5G19150	AT5G21060
UniProt Keywords KW-0057 Aromatic amino acid biosynthesis 9 36 1.19 7.62e-07 3702.AT1G15710.1	3702.AT1G69370.1	3702.AT3G06350.1	3702.AT3G29200.1	3702.AT3G54640.1	3702.AT4G02610.1	3702.AT4G27070.1	3702.AT5G10870.1	3702.AT5G66120.2 AT1G15710	CM3	MEE32	CM1	TSA2	AT4G02610	TSB2	CM2	AT5G66120
UniProt Keywords KW-0809 Transit peptide 63 1863 0.32 9.92e-07 3702.AT1G12900.1	3702.AT1G15500.1	3702.AT1G15710.1	3702.AT1G20020.1	3702.AT1G29880.1	3702.AT1G30510.2	3702.AT1G31190.1	3702.AT1G32060.1	3702.AT1G32500.1	3702.AT1G42970.1	3702.AT1G50170.1	3702.AT1G52160.1	3702.AT1G55490.2	3702.AT1G67090.1	3702.AT1G67280.1	3702.AT1G69370.1	3702.AT1G74920.1	3702.AT2G04700.1	3702.AT2G15570.2	3702.AT2G21170.1	3702.AT2G21330.1	3702.AT2G28000.1	3702.AT2G35490.1	3702.AT2G37500.1	3702.AT2G40300.1	3702.AT2G43710.1	3702.AT3G04790.1	3702.AT3G06350.1	3702.AT3G15360.1	3702.AT3G16950.2	3702.AT3G23400.1	3702.AT3G25780.1	3702.AT3G27850.1	3702.AT3G29200.1	3702.AT3G49680.1	3702.AT3G54640.1	3702.AT3G55800.1	3702.AT3G60750.1	3702.AT3G60880.2	3702.AT4G05390.1	3702.AT4G08790.1	3702.AT4G12060.1	3702.AT4G13430.1	3702.AT4G16155.1	3702.AT4G19710.2	3702.AT4G22240.1	3702.AT4G25100.1	3702.AT4G27070.1	3702.AT4G29120.1	3702.AT4G34200.1
UniProt Keywords KW-0413 Isomerase 18 231 0.68 2.57e-06 3702.AT1G17890.1	3702.AT1G23190.1	3702.AT1G69370.1	3702.AT1G70730.3	3702.AT2G02390.3	3702.AT2G21170.1	3702.AT2G22240.1	3702.AT3G01590.2	3702.AT3G04790.1	3702.AT3G25780.1	3702.AT3G29200.1	3702.AT3G55440.1	3702.AT4G39800.1	3702.AT5G10870.1	3702.AT5G16510.2	3702.AT5G42740.1	3702.AT5G57330.1	3702.AT5G61410.1 At1g17890	PGM3	CM3	PGM2	GSTZ1	TIM	MIPS2	AT3G01590	EMB3119	AOC3	CM1	TPI	MIPS1	CM2	RGP5	AT5G42740	AT5G57330	RPE
UniProt Keywords KW-0113 Calvin cycle 6 17 1.34 2.58e-05 3702.AT1G12900.1	3702.AT1G32060.1	3702.AT1G42970.1	3702.AT1G67090.1	3702.AT2G21170.1	3702.AT3G55800.1 GAPA-2	PRK	GAPB	RBCS1A	TIM	SBPASE
UniProt Keywords KW-0597 Phosphoprotein 55 1759 0.29 7.00e-05 3702.AT1G11840.6	3702.AT1G12000.1	3702.AT1G12840.1	3702.AT1G14320.1	3702.AT1G15340.1	3702.AT1G20020.1	3702.AT1G20450.1	3702.AT1G30510.2	3702.AT1G33120.1	3702.AT1G35160.2	3702.AT1G35580.2	3702.AT1G35720.1	3702.AT1G36310.1	3702.AT1G47200.1	3702.AT1G53310.3	3702.AT1G55490.2	3702.AT1G67090.1	3702.AT1G69800.2	3702.AT1G70410.2	3702.AT1G78300.1	3702.AT1G78380.1	3702.AT2G21170.1	3702.AT2G21330.1	3702.AT2G28000.1	3702.AT2G29450.1	3702.AT2G30860.1	3702.AT2G42590.3	3702.AT2G42600.1	3702.AT2G45820.1	3702.AT3G04790.1	3702.AT3G12390.1	3702.AT3G12490.2	3702.AT3G14940.1	3702.AT3G23400.1	3702.AT3G52880.2	3702.AT3G53620.1	3702.AT3G53870.1	3702.AT3G55440.1	3702.AT3G60750.1	3702.AT4G00810.1	3702.AT4G05390.1	3702.AT4G11740.1	3702.AT4G22240.1	3702.AT4G23040.1	3702.AT4G32840.1	3702.AT4G36940.1	3702.AT5G02770.1	3702.AT5G08100.1	3702.AT5G08280.1	3702.AT5G13850.1
UniProt Keywords KW-0676 Redox-active center 11 120 0.75 0.00016 3702.AT2G04700.1	3702.AT2G15570.2	3702.AT2G17420.1	3702.AT3G15360.1	3702.AT3G16950.2	3702.AT3G52880.2	3702.AT4G16155.1	3702.AT5G06290.1	3702.AT5G20500.1	3702.AT5G40370.2	3702.AT5G42980.1 AT2G04700	ATHM3	NTRA	TRX-M4	LPD1	MDAR1	AT4G16155	At5g06290	AT5G20500	GRXC2	TRX3
UniProt Keywords KW-0479 Metal-binding 83 3261 0.2 0.00047 3702.AT1G01050.1	3702.AT1G05350.1	3702.AT1G06570.1	3702.AT1G11840.6	3702.AT1G12000.1	3702.AT1G12050.1	3702.AT1G12310.1	3702.AT1G18210.1	3702.AT1G23190.1	3702.AT1G31190.1	3702.AT1G43670.1	3702.AT1G50170.1	3702.AT1G52160.1	3702.AT1G62810.1	3702.AT1G62820.1	3702.AT1G67280.1	3702.AT1G70730.3	3702.AT1G71750.2	3702.AT1G72680.1	3702.AT1G76550.1	3702.AT1G79690.1	3702.AT2G03800.1	3702.AT2G04700.1	3702.AT2G16060.1	3702.AT2G18230.1	3702.AT2G27150.2	3702.AT2G27190.1	3702.AT2G29560.1	3702.AT2G36530.1	3702.AT2G40300.1	3702.AT2G42910.1	3702.AT2G43710.1	3702.AT3G02770.1	3702.AT3G03780.1	3702.AT3G10850.1	3702.AT3G16080.1	3702.AT3G17210.1	3702.AT3G26720.1	3702.AT3G43600.1	3702.AT3G53620.1	3702.AT3G55800.1	3702.AT3G56240.1	3702.AT3G60245.1	3702.AT3G60750.1	3702.AT3G61110.1	3702.AT3G62250.1	3702.AT4G04040.1	3702.AT4G13430.1	3702.AT4G13720.1	3702.AT4G17830.2
UniProt Keywords KW-0120 Carbon dioxide fixation 4 9 1.44 0.00070 3702.AT1G53310.3	3702.AT1G67090.1	3702.AT2G42600.1	3702.AT3G14940.1 PPC1	RBCS1A	PPC2	PPC3
UniProt Keywords KW-0663 Pyridoxal phosphate 10 123 0.7 0.00094 3702.AT1G50110.1	3702.AT1G65960.2	3702.AT1G80360.1	3702.AT3G04520.1	3702.AT3G16050.1	3702.AT3G46970.1	3702.AT3G49680.1	3702.AT4G27070.1	3702.AT5G01410.1	3702.AT5G19550.1 AT1G50110	GAD2	AT1G80360	THA2	PDX1.2	PHS2	BCAT3	TSB2	RSR4	ASP2
UniProt Keywords KW-0031 Aminopeptidase 5 22 1.15 0.00098 3702.AT2G14260.1	3702.AT3G61540.1	3702.AT4G20850.1	3702.AT4G33090.1	3702.AT5G60160.1 PIP	AT3G61540	TPP2	APM1	AT5G60160
UniProt Keywords KW-1017 Isopeptide bond 10 131 0.67 0.0014 3702.AT1G04410.1	3702.AT1G31340.1	3702.AT1G77710.1	3702.AT1G79210.2	3702.AT2G27020.1	3702.AT3G22110.1	3702.AT3G51260.1	3702.AT3G62250.1	3702.AT4G26840.1	3702.AT5G42790.1 c-NAD-MDH1	RUB1	CCP2	AT1G79210	PAG1	PAC1	PAD1	UBQ5	SUMO1	PAF1
UniProt Keywords KW-0511 Multifunctional enzyme 7 62 0.84 0.0017 3702.AT1G17890.1	3702.AT2G37500.1	3702.AT3G06350.1	3702.AT3G12290.1	3702.AT4G19710.2	3702.AT5G63980.1	3702.AT5G63990.1 At1g17890	AT2G37500	MEE32	AT3G12290	AKHSDH2	SAL1	AT5G63990
UniProt Keywords KW-0865 Zymogen 8 92 0.73 0.0030 3702.AT1G11910.1	3702.AT1G13060.2	3702.AT1G56450.1	3702.AT3G26340.1	3702.AT3G27430.2	3702.AT4G20430.1	3702.AT4G31300.2	3702.AT5G67360.1 APA1	PBE1	PBG1	AT3G26340	PBB1	AT4G20430	PBA1	ARA12
UniProt Keywords KW-0411 Iron-sulfur 9 119 0.67 0.0031 3702.AT1G50170.1	3702.AT2G04700.1	3702.AT2G27150.2	3702.AT3G43600.1	3702.AT4G13430.1	3702.AT4G34890.1	3702.AT4G35830.1	3702.AT5G04590.1	3702.AT5G60600.1 SIRB	AT2G04700	AAO3	AAO2	IIL1	XDH1	At4g35830	SIR	HDS
UniProt Keywords KW-0073 Auxin biosynthesis 5 33 0.97 0.0045 3702.AT1G80360.1	3702.AT2G27150.2	3702.AT3G43600.1	3702.AT3G54640.1	3702.AT4G02610.1 AT1G80360	AAO3	AAO2	TSA2	AT4G02610
UniProt Keywords KW-0143 Chaperone 11 191 0.55 0.0057 3702.AT1G08780.1	3702.AT1G55490.2	3702.AT2G28000.1	3702.AT2G30410.2	3702.AT3G51780.1	3702.AT3G56240.1	3702.AT4G16660.1	3702.AT5G17710.2	3702.AT5G23290.1	3702.AT5G42980.1	3702.AT5G49510.1 AIP3	CPN60B	CPN60A	KIS	BAG4	CCH	AT4G16660	EMB1241	PFD5	TRX3	PFD3
UniProt Keywords KW-0100 Branched-chain amino acid biosynthesis 4 20 1.09 0.0068 3702.AT1G50110.1	3702.AT3G49680.1	3702.AT4G13430.1	3702.AT5G21060.2 AT1G50110	BCAT3	IIL1	AT5G21060
UniProt Keywords KW-0004 4Fe-4S 6 58 0.81 0.0069 3702.AT1G50170.1	3702.AT2G04700.1	3702.AT4G13430.1	3702.AT4G35830.1	3702.AT5G04590.1	3702.AT5G60600.1 SIRB	AT2G04700	IIL1	At4g35830	SIR	HDS
UniProt Keywords KW-0346 Stress response 20 527 0.37 0.0069 3702.AT1G19570.1	3702.AT1G20450.1	3702.AT1G35720.1	3702.AT1G44170.2	3702.AT1G54100.1	3702.AT1G78380.1	3702.AT2G02390.3	3702.AT2G02990.1	3702.AT2G29450.1	3702.AT2G30860.1	3702.AT2G30870.1	3702.AT3G02720.1	3702.AT3G14990.1	3702.AT3G18030.1	3702.AT3G25530.1	3702.AT3G43190.1	3702.AT4G20850.1	3702.AT5G20830.1	3702.AT5G38480.1	3702.AT5G52310.1 DHAR1	ERD10	ANNAT1	ALDH3H1	ALDH7B4	GSTU19	GSTZ1	RNS1	GSTU5	GSTF9	GSTF10	DJ1D	DJ1A	HAL3A	GLYR1	SUS4	TPP2	SUS1	RCI1A	LTI78
UniProt Keywords KW-0210 Decarboxylase 5 39 0.9 0.0078 3702.AT1G65960.2	3702.AT2G35450.1	3702.AT3G18030.1	3702.AT3G46440.2	3702.AT5G59290.2 GAD2	AT2G35450	HAL3A	UXS5	UXS3
UniProt Keywords KW-0602 Photosynthesis 8 114 0.64 0.0090 3702.AT1G20020.1	3702.AT1G30510.2	3702.AT1G32060.1	3702.AT1G53310.3	3702.AT1G67090.1	3702.AT2G42600.1	3702.AT3G14940.1	3702.AT4G05390.1 FNR2	RFNR2	PRK	PPC1	RBCS1A	PPC2	PPC3	RFNR1
UniProt Keywords KW-0216 Detoxification 6 66 0.75 0.0116 3702.AT1G19570.1	3702.AT1G78380.1	3702.AT2G02390.3	3702.AT2G29450.1	3702.AT2G30860.1	3702.AT2G30870.1 DHAR1	GSTU19	GSTZ1	GSTU5	GSTF9	GSTF10
UniProt Keywords KW-0500 Molybdenum 3 12 1.19 0.0176 3702.AT2G27150.2	3702.AT3G43600.1	3702.AT4G34890.1 AAO3	AAO2	XDH1
UniProt Keywords KW-0620 Polyamine biosynthesis 3 12 1.19 0.0176 3702.AT1G23820.1	3702.AT1G70310.1	3702.AT5G53120.6 SPDS1	SPDS2	SPDS3
UniProt Keywords KW-0285 Flavoprotein 11 232 0.47 0.0203 3702.AT1G20020.1	3702.AT1G30510.2	3702.AT2G17420.1	3702.AT2G27150.2	3702.AT3G16950.2	3702.AT3G18030.1	3702.AT3G43600.1	3702.AT3G52880.2	3702.AT4G05390.1	3702.AT4G16155.1	3702.AT4G34890.1 FNR2	RFNR2	NTRA	AAO3	LPD1	HAL3A	AAO2	MDAR1	RFNR1	AT4G16155	XDH1
UniProt Keywords KW-1015 Disulfide bond 34 1223 0.23 0.0209 3702.AT1G11910.1	3702.AT1G15000.1	3702.AT1G15120.2	3702.AT1G20020.1	3702.AT1G30510.2	3702.AT1G32060.1	3702.AT1G44170.2	3702.AT1G62810.1	3702.AT1G72260.1	3702.AT2G02990.1	3702.AT2G04700.1	3702.AT2G15570.2	3702.AT2G17420.1	3702.AT2G22970.3	3702.AT2G27190.1	3702.AT3G12500.1	3702.AT3G15360.1	3702.AT3G16950.2	3702.AT3G16990.1	3702.AT3G26720.1	3702.AT3G55260.1	3702.AT3G55800.1	3702.AT3G56310.1	3702.AT4G05390.1	3702.AT4G12910.1	3702.AT4G16155.1	3702.AT5G05340.1	3702.AT5G06290.1	3702.AT5G06730.1	3702.AT5G20500.1	3702.AT5G27470.1	3702.AT5G40370.2	3702.AT5G42980.1	3702.AT5G64120.1 APA1	scpl50	AT1G15120	FNR2	RFNR2	PRK	ALDH3H1	CuAO1	THI2.1	RNS1	AT2G04700	ATHM3	NTRA	SCPL11	PAP12	HCHIB	TRX-M4
UniProt Keywords KW-0024 Alternative initiation 4 31 0.9 0.0229 3702.AT1G29880.1	3702.AT4G08790.1	3702.AT4G29120.1	3702.AT5G19150.1 AT1G29880	AT4G08790	AT4G29120	AT5G19150
UniProt Keywords KW-0274 FAD 10 203 0.48 0.0232 3702.AT1G20020.1	3702.AT1G30510.2	3702.AT2G17420.1	3702.AT2G27150.2	3702.AT3G16950.2	3702.AT3G43600.1	3702.AT3G52880.2	3702.AT4G05390.1	3702.AT4G16155.1	3702.AT4G34890.1 FNR2	RFNR2	NTRA	AAO3	LPD1	AAO2	MDAR1	RFNR1	AT4G16155	XDH1
UniProt Keywords KW-0398 Inositol biosynthesis 2 3 1.61 0.0239 3702.AT2G22240.1	3702.AT4G39800.1 MIPS2	MIPS1
UniProt Keywords KW-0585 Phenylalanine catabolism 2 3 1.61 0.0239 3702.AT1G06570.1	3702.AT1G12050.1 PDS1	AT1G12050
UniProt Keywords KW-0828 Tyrosine catabolism 2 3 1.61 0.0239 3702.AT1G06570.1	3702.AT1G12050.1 PDS1	AT1G12050
UniProt Keywords KW-0249 Electron transport 10 207 0.47 0.0244 3702.AT1G15120.2	3702.AT1G20020.1	3702.AT1G30510.2	3702.AT2G15570.2	3702.AT2G17420.1	3702.AT3G15360.1	3702.AT4G05390.1	3702.AT5G20500.1	3702.AT5G40370.2	3702.AT5G42980.1 AT1G15120	FNR2	RFNR2	ATHM3	NTRA	TRX-M4	RFNR1	AT5G20500	GRXC2	TRX3
UniProt Keywords KW-0822 Tryptophan biosynthesis 3 15 1.09 0.0247 3702.AT3G54640.1	3702.AT4G02610.1	3702.AT4G27070.1 TSA2	AT4G02610	TSB2
UniProt Keywords KW-0312 Gluconeogenesis 2 4 1.49 0.0321 3702.AT3G55440.1	3702.AT5G42740.1 TPI	AT5G42740
UniProt Keywords KW-0704 Schiff base 3 17 1.04 0.0324 3702.AT2G21330.1	3702.AT3G60880.2	3702.AT5G01410.1 FBA1	DHDPS1	RSR4
UniProt Keywords KW-0819 tRNA processing 5 62 0.7 0.0367 3702.AT1G52160.1	3702.AT2G45730.1	3702.AT4G22720.1	3702.AT5G14600.1	3702.AT5G15810.1 TRZ3	AT2G45730	AT4G22720	AT5G14600	AT5G15810
UniProt Keywords KW-0326 Glycosidase 13 346 0.37 0.0448 3702.AT1G05620.1	3702.AT1G09010.1	3702.AT1G35580.2	3702.AT2G28100.1	3702.AT3G12500.1	3702.AT3G16850.1	3702.AT3G26720.1	3702.AT3G47000.1	3702.AT3G54440.3	3702.AT3G55260.1	3702.AT3G56310.1	3702.AT5G10560.1	3702.AT5G11720.1 URH2	AT1G09010	CINV1	FUC1	HCHIB	AT3G16850	AT3G26720	AT3G47000	AT3G54440	HEXO1	AT3G56310	AT5G10560	AT5G11720
Pfam PF00227 Proteasome subunit 16 24 1.61 1.72e-15 3702.AT1G13060.2	3702.AT1G21720.1	3702.AT1G56450.1	3702.AT1G77440.1	3702.AT1G79210.2	3702.AT2G05840.1	3702.AT2G27020.1	3702.AT3G22110.1	3702.AT3G26340.1	3702.AT3G27430.2	3702.AT3G51260.1	3702.AT3G60820.1	3702.AT4G14800.2	3702.AT4G31300.2	3702.AT5G35590.1	3702.AT5G42790.1 PBE1	PBC1	PBG1	PBC2	AT1G79210	At2g05840	PAG1	PAC1	AT3G26340	PBB1	PAD1	PBF1	PBD2	PBA1	At5g35590	PAF1
Pfam PF10584 Proteasome subunit A N-terminal signature 7 13 1.52 2.36e-05 3702.AT1G79210.2	3702.AT2G05840.1	3702.AT2G27020.1	3702.AT3G22110.1	3702.AT3G51260.1	3702.AT5G35590.1	3702.AT5G42790.1 AT1G79210	At2g05840	PAG1	PAC1	PAD1	At5g35590	PAF1
Pfam PF03807 NADP oxidoreductase coenzyme F420-dependent 6 12 1.49 0.00024 3702.AT1G15710.1	3702.AT1G71170.1	3702.AT3G06350.1	3702.AT3G25530.1	3702.AT4G29120.1	3702.AT5G14800.1 AT1G15710	AT1G71170	MEE32	GLYR1	AT4G29120	P5CR
Pfam PF00244 14-3-3 protein 6 15 1.39 0.00051 3702.AT1G35160.2	3702.AT1G78300.1	3702.AT2G42590.3	3702.AT4G09000.2	3702.AT5G16050.1	3702.AT5G38480.1 At1g35160	GF14	At2g42590	At4g09000	At5g16050	RCI1A
Pfam PF01849 NAC domain 5 7 1.64 0.00051 3702.AT1G17880.1	3702.AT3G12390.1	3702.AT3G49470.1	3702.AT4G10480.1	3702.AT5G13850.1 BTF3	AT3G12390	NACA2	AT4G10480	NACA3
Pfam PF13602 Zinc-binding dehydrogenase 6 18 1.31 0.00081 3702.AT1G72680.1	3702.AT4G21580.1	3702.AT5G16970.1	3702.AT5G17000.1	3702.AT5G51970.1	3702.AT5G61510.1 CADG	AT4G21580	AER	AT5G17000	AT5G51970	AT5G61510
Pfam PF00365 Phosphofructokinase 5 11 1.45 0.0016 3702.AT1G12000.1	3702.AT1G76550.1	3702.AT4G04040.1	3702.AT4G32840.1	3702.AT5G56630.1 AT1G12000	AT1G76550	MEE51	PFK6	PFK7
Pfam PF11976 Ubiquitin-2 like Rad60 SUMO-like 7 35 1.09 0.0016 3702.AT1G31340.1	3702.AT3G02540.1	3702.AT3G13235.1	3702.AT3G62250.1	3702.AT4G26840.1	3702.AT5G38470.1	3702.AT5G55160.2 RUB1	RAD23C	DDI1	UBQ5	SUMO1	RAD23D	SUMO2
Pfam PF00107 Zinc-binding dehydrogenase 7 40 1.03 0.0029 3702.AT1G72680.1	3702.AT4G21580.1	3702.AT5G16970.1	3702.AT5G17000.1	3702.AT5G24760.1	3702.AT5G51970.1	3702.AT5G61510.1 CADG	AT4G21580	AER	AT5G17000	AT5G24760	AT5G51970	AT5G61510
Pfam PF03446 NAD binding domain of 6-phosphogluconate dehydrogenase 5 20 1.19 0.0120 3702.AT1G15710.1	3702.AT1G71170.1	3702.AT3G25530.1	3702.AT4G29120.1	3702.AT5G14800.1 AT1G15710	AT1G71170	GLYR1	AT4G29120	P5CR
Pfam PF00240 Ubiquitin family 8 74 0.82 0.0132 3702.AT1G31340.1	3702.AT3G02540.1	3702.AT3G13235.1	3702.AT3G51780.1	3702.AT3G62250.1	3702.AT4G26840.1	3702.AT5G38470.1	3702.AT5G55160.2 RUB1	RAD23C	DDI1	BAG4	UBQ5	SUMO1	RAD23D	SUMO2
Pfam PF00311 Phosphoenolpyruvate carboxylase 3 4 1.67 0.0327 3702.AT1G53310.3	3702.AT2G42600.1	3702.AT3G14940.1 PPC1	PPC2	PPC3
Pfam PF00984 UDP-glucose/GDP-mannose dehydrogenase family	central domain 3 4 1.67 0.0327 3702.AT1G26570.1	3702.AT3G29360.1	3702.AT5G15490.1 UGD1	UGD2	UGD3
Pfam PF08079 Ribosomal L30 N-terminal domain 3 4 1.67 0.0327 3702.AT2G01250.1	3702.AT2G44120.2	3702.AT3G13580.3 AT2G01250	AT2G44120	AT3G13580
Pfam PF08240 Alcohol dehydrogenase GroES-like domain 5 28 1.04 0.0327 3702.AT1G72680.1	3702.AT4G21580.1	3702.AT5G24760.1	3702.AT5G51970.1	3702.AT5G61510.1 CADG	AT4G21580	AT5G24760	AT5G51970	AT5G61510
Pfam PF17284 Spermidine synthase tetramerisation domain 3 4 1.67 0.0327 3702.AT1G23820.1	3702.AT1G70310.1	3702.AT5G53120.6 SPDS1	SPDS2	SPDS3
Pfam PF00327 Ribosomal protein L30p/L7e 3 5 1.57 0.0365 3702.AT2G01250.1	3702.AT2G44120.2	3702.AT3G13580.3 AT2G01250	AT2G44120	AT3G13580
Pfam PF01564 Spermine/spermidine synthase domain 3 5 1.57 0.0365 3702.AT1G23820.1	3702.AT1G70310.1	3702.AT5G53120.6 SPDS1	SPDS2	SPDS3
Pfam PF03720 UDP-glucose/GDP-mannose dehydrogenase family	UDP binding domain 3 5 1.57 0.0365 3702.AT1G26570.1	3702.AT3G29360.1	3702.AT5G15490.1 UGD1	UGD2	UGD3
Pfam PF03721 UDP-glucose/GDP-mannose dehydrogenase family	NAD binding domain 3 5 1.57 0.0365 3702.AT1G26570.1	3702.AT3G29360.1	3702.AT5G15490.1 UGD1	UGD2	UGD3
Pfam PF13266 Protein of unknown function (DUF4057) 3 5 1.57 0.0365 3702.AT1G35780.1	3702.AT1G78150.3	3702.AT4G39860.1 AT1G35780	AT1G78150	AT4G39860
Pfam PF00719 Inorganic pyrophosphatase 3 6 1.49 0.0418 3702.AT1G01050.1	3702.AT2G18230.1	3702.AT3G53620.1 PPa1	PPa2	PPa4
Pfam PF00941 FAD binding domain in molybdopterin dehydrogenase 3 6 1.49 0.0418 3702.AT2G27150.2	3702.AT3G43600.1	3702.AT4G34890.1 AAO3	AAO2	XDH1
Pfam PF01315 Aldehyde oxidase and xanthine dehydrogenase	a/b hammerhead domain 3 6 1.49 0.0418 3702.AT2G27150.2	3702.AT3G43600.1	3702.AT4G34890.1 AAO3	AAO2	XDH1
Pfam PF01799 [2Fe-2S] binding domain 3 6 1.49 0.0418 3702.AT2G27150.2	3702.AT3G43600.1	3702.AT4G34890.1 AAO3	AAO2	XDH1
Pfam PF03450 CO dehydrogenase flavoprotein C-terminal domain 3 6 1.49 0.0418 3702.AT2G27150.2	3702.AT3G43600.1	3702.AT4G34890.1 AAO3	AAO2	XDH1
Pfam PF02798 Glutathione S-transferase	N-terminal domain 6 55 0.83 0.0454 3702.AT1G19570.1	3702.AT1G78380.1	3702.AT2G02390.3	3702.AT2G29450.1	3702.AT2G30860.1	3702.AT2G30870.1 DHAR1	GSTU19	GSTZ1	GSTU5	GSTF9	GSTF10
Pfam PF00044 Glyceraldehyde 3-phosphate dehydrogenase	NAD binding domain 3 7 1.42 0.0463 3702.AT1G12900.1	3702.AT1G13440.1	3702.AT1G42970.1 GAPA-2	GAPC2	GAPB
Pfam PF02800 Glyceraldehyde 3-phosphate dehydrogenase	C-terminal domain 3 7 1.42 0.0463 3702.AT1G12900.1	3702.AT1G13440.1	3702.AT1G42970.1 GAPA-2	GAPC2	GAPB
Pfam PF14833 NAD-binding of NADP-dependent 3-hydroxyisobutyrate dehydrogenase 3 7 1.42 0.0463 3702.AT1G71170.1	3702.AT3G25530.1	3702.AT4G29120.1 AT1G71170	GLYR1	AT4G29120
InterPro IPR029055 Nucleophile aminohydrolases	N-terminal 20 48 1.41 1.67e-16 3702.AT1G13060.2	3702.AT1G21720.1	3702.AT1G56450.1	3702.AT1G77440.1	3702.AT1G79210.2	3702.AT2G05840.1	3702.AT2G27020.1	3702.AT3G22110.1	3702.AT3G22850.1	3702.AT3G26340.1	3702.AT3G27430.2	3702.AT3G51260.1	3702.AT3G60820.1	3702.AT4G14800.2	3702.AT4G31300.2	3702.AT5G08100.1	3702.AT5G19140.1	3702.AT5G35590.1	3702.AT5G42790.1	3702.AT5G43830.1 PBE1	PBC1	PBG1	PBC2	AT1G79210	At2g05840	PAG1	PAC1	AT3G22850	AT3G26340	PBB1	PAD1	PBF1	PBD2	PBA1	ASPGA1	AILP1	At5g35590	PAF1	AT5G43830
InterPro IPR001353 Proteasome	subunit alpha/beta 16 24 1.61 1.65e-15 3702.AT1G13060.2	3702.AT1G21720.1	3702.AT1G56450.1	3702.AT1G77440.1	3702.AT1G79210.2	3702.AT2G05840.1	3702.AT2G27020.1	3702.AT3G22110.1	3702.AT3G26340.1	3702.AT3G27430.2	3702.AT3G51260.1	3702.AT3G60820.1	3702.AT4G14800.2	3702.AT4G31300.2	3702.AT5G35590.1	3702.AT5G42790.1 PBE1	PBC1	PBG1	PBC2	AT1G79210	At2g05840	PAG1	PAC1	AT3G26340	PBB1	PAD1	PBF1	PBD2	PBA1	At5g35590	PAF1
InterPro IPR036291 NAD(P)-binding domain superfamily 33 340 0.78 3.85e-12 3702.AT1G04410.1	3702.AT1G12900.1	3702.AT1G13440.1	3702.AT1G15710.1	3702.AT1G17890.1	3702.AT1G26570.1	3702.AT1G42970.1	3702.AT1G71170.1	3702.AT1G72680.1	3702.AT2G22240.1	3702.AT3G06350.1	3702.AT3G12290.1	3702.AT3G25530.1	3702.AT3G29360.1	3702.AT3G46440.2	3702.AT3G51160.1	3702.AT4G09670.1	3702.AT4G17260.1	3702.AT4G19710.2	3702.AT4G21580.1	3702.AT4G29120.1	3702.AT4G34200.1	3702.AT4G39800.1	3702.AT5G06060.1	3702.AT5G14800.1	3702.AT5G15490.1	3702.AT5G16970.1	3702.AT5G17000.1	3702.AT5G21060.2	3702.AT5G24760.1	3702.AT5G51970.1	3702.AT5G59290.2	3702.AT5G61510.1 c-NAD-MDH1	GAPA-2	GAPC2	AT1G15710	At1g17890	UGD1	GAPB	AT1G71170	CADG	MIPS2	MEE32	AT3G12290	GLYR1	UGD2	UXS5	MUR1	AT4G09670	AT4G17260
InterPro IPR016050 Proteasome beta-type subunit	conserved site 9 11 1.7 1.23e-08 3702.AT1G13060.2	3702.AT1G21720.1	3702.AT1G56450.1	3702.AT1G77440.1	3702.AT3G26340.1	3702.AT3G27430.2	3702.AT3G60820.1	3702.AT4G14800.2	3702.AT4G31300.2 PBE1	PBC1	PBG1	PBC2	AT3G26340	PBB1	PBF1	PBD2	PBA1
InterPro IPR023333 Proteasome B-type subunit 9 11 1.7 1.23e-08 3702.AT1G13060.2	3702.AT1G21720.1	3702.AT1G56450.1	3702.AT1G77440.1	3702.AT3G26340.1	3702.AT3G27430.2	3702.AT3G60820.1	3702.AT4G14800.2	3702.AT4G31300.2 PBE1	PBC1	PBG1	PBC2	AT3G26340	PBB1	PBF1	PBD2	PBA1
InterPro IPR013785 Aldolase-type TIM barrel 13 87 0.96 6.80e-06 3702.AT2G21170.1	3702.AT2G21330.1	3702.AT3G06350.1	3702.AT3G16050.1	3702.AT3G54640.1	3702.AT3G55440.1	3702.AT3G56310.1	3702.AT3G60880.2	3702.AT4G02610.1	3702.AT4G36940.1	3702.AT5G01410.1	3702.AT5G61410.1	3702.AT5G64250.2 TIM	FBA1	MEE32	PDX1.2	TSA2	TPI	AT3G56310	DHDPS1	AT4G02610	NAPRT1	RSR4	RPE	AT5G64250
InterPro IPR000426 Proteasome alpha-subunit	N-terminal domain 7 13 1.52 1.29e-05 3702.AT1G79210.2	3702.AT2G05840.1	3702.AT2G27020.1	3702.AT3G22110.1	3702.AT3G51260.1	3702.AT5G35590.1	3702.AT5G42790.1 AT1G79210	At2g05840	PAG1	PAC1	PAD1	At5g35590	PAF1
InterPro IPR023332 Proteasome alpha-type subunit 7 13 1.52 1.29e-05 3702.AT1G79210.2	3702.AT2G05840.1	3702.AT2G27020.1	3702.AT3G22110.1	3702.AT3G51260.1	3702.AT5G35590.1	3702.AT5G42790.1 AT1G79210	At2g05840	PAG1	PAC1	PAD1	At5g35590	PAF1
InterPro IPR008927 6-phosphogluconate dehydrogenase-like	C-terminal domain superfamily 8 25 1.3 2.39e-05 3702.AT1G15710.1	3702.AT1G26570.1	3702.AT1G71170.1	3702.AT3G25530.1	3702.AT3G29360.1	3702.AT4G29120.1	3702.AT5G14800.1	3702.AT5G15490.1 AT1G15710	UGD1	AT1G71170	GLYR1	UGD2	AT4G29120	P5CR	UGD3
InterPro IPR023409 14-3-3 protein	conserved site 6 13 1.45 0.00020 3702.AT1G35160.2	3702.AT1G78300.1	3702.AT2G42590.3	3702.AT4G09000.2	3702.AT5G16050.1	3702.AT5G38480.1 At1g35160	GF14	At2g42590	At4g09000	At5g16050	RCI1A
InterPro IPR044034 Nascent polypeptide-associated complex subunit alpha-like	UBA domain 5 6 1.71 0.00022 3702.AT3G06610.1	3702.AT3G12390.1	3702.AT3G49470.1	3702.AT4G10480.1	3702.AT5G13850.1 AT3G06610	AT3G12390	NACA2	AT4G10480	NACA3
InterPro IPR023410 14-3-3 domain 6 14 1.42 0.00024 3702.AT1G35160.2	3702.AT1G78300.1	3702.AT2G42590.3	3702.AT4G09000.2	3702.AT5G16050.1	3702.AT5G38480.1 At1g35160	GF14	At2g42590	At4g09000	At5g16050	RCI1A
InterPro IPR000308 14-3-3 protein 6 15 1.39 0.00030 3702.AT1G35160.2	3702.AT1G78300.1	3702.AT2G42590.3	3702.AT4G09000.2	3702.AT5G16050.1	3702.AT5G38480.1 At1g35160	GF14	At2g42590	At4g09000	At5g16050	RCI1A
InterPro IPR002715 Nascent polypeptide-associated complex NAC domain 5 7 1.64 0.00030 3702.AT1G17880.1	3702.AT3G12390.1	3702.AT3G49470.1	3702.AT4G10480.1	3702.AT5G13850.1 BTF3	AT3G12390	NACA2	AT4G10480	NACA3
InterPro IPR036815 14-3-3 domain superfamily 6 15 1.39 0.00030 3702.AT1G35160.2	3702.AT1G78300.1	3702.AT2G42590.3	3702.AT4G09000.2	3702.AT5G16050.1	3702.AT5G38480.1 At1g35160	GF14	At2g42590	At4g09000	At5g16050	RCI1A
InterPro IPR038187 NAC A/B domain superfamily 5 7 1.64 0.00030 3702.AT1G17880.1	3702.AT3G12390.1	3702.AT3G49470.1	3702.AT4G10480.1	3702.AT5G13850.1 BTF3	AT3G12390	NACA2	AT4G10480	NACA3
InterPro IPR020843 Polyketide synthase	enoylreductase domain 7 30 1.16 0.00056 3702.AT1G72680.1	3702.AT4G21580.1	3702.AT5G16970.1	3702.AT5G17000.1	3702.AT5G24760.1	3702.AT5G51970.1	3702.AT5G61510.1 CADG	AT4G21580	AER	AT5G17000	AT5G24760	AT5G51970	AT5G61510
InterPro IPR000023 Phosphofructokinase domain 5 11 1.45 0.0012 3702.AT1G12000.1	3702.AT1G76550.1	3702.AT4G04040.1	3702.AT4G32840.1	3702.AT5G56630.1 AT1G12000	AT1G76550	MEE51	PFK6	PFK7
InterPro IPR022953 ATP-dependent 6-phosphofructokinase 5 11 1.45 0.0012 3702.AT1G12000.1	3702.AT1G76550.1	3702.AT4G04040.1	3702.AT4G32840.1	3702.AT5G56630.1 AT1G12000	AT1G76550	MEE51	PFK6	PFK7
InterPro IPR035966 Phosphofructokinase superfamily 5 11 1.45 0.0012 3702.AT1G12000.1	3702.AT1G76550.1	3702.AT4G04040.1	3702.AT4G32840.1	3702.AT5G56630.1 AT1G12000	AT1G76550	MEE51	PFK6	PFK7
InterPro IPR013149 Alcohol dehydrogenase	C-terminal 7 37 1.07 0.0015 3702.AT1G72680.1	3702.AT4G21580.1	3702.AT5G16970.1	3702.AT5G17000.1	3702.AT5G24760.1	3702.AT5G51970.1	3702.AT5G61510.1 CADG	AT4G21580	AER	AT5G17000	AT5G24760	AT5G51970	AT5G61510
InterPro IPR000243 Peptidase T1A	proteasome beta-subunit 4 5 1.69 0.0019 3702.AT1G13060.2	3702.AT3G26340.1	3702.AT3G27430.2	3702.AT4G31300.2 PBE1	AT3G26340	PBB1	PBA1
InterPro IPR016641 Nascent polypeptide-associated complex subunit alpha 4 5 1.69 0.0019 3702.AT3G12390.1	3702.AT3G49470.1	3702.AT4G10480.1	3702.AT5G13850.1 AT3G12390	NACA2	AT4G10480	NACA3
InterPro IPR015813 Pyruvate/Phosphoenolpyruvate kinase-like domain superfamily 6 28 1.12 0.0034 3702.AT1G53310.3	3702.AT2G42600.1	3702.AT3G14940.1	3702.AT5G08570.1	3702.AT5G56350.1	3702.AT5G63680.1 PPC1	PPC2	PPC3	AT5G08570	AT5G56350	AT5G63680
InterPro IPR011060 Ribulose-phosphate binding barrel 5 16 1.29 0.0036 3702.AT3G16050.1	3702.AT3G54640.1	3702.AT4G02610.1	3702.AT5G01410.1	3702.AT5G61410.1 PDX1.2	TSA2	AT4G02610	RSR4	RPE
InterPro IPR029071 Ubiquitin-like domain superfamily 11 129 0.72 0.0036 3702.AT1G31340.1	3702.AT1G77710.1	3702.AT3G02540.1	3702.AT3G13235.1	3702.AT3G51780.1	3702.AT3G62250.1	3702.AT4G11740.1	3702.AT4G23040.1	3702.AT4G26840.1	3702.AT5G38470.1	3702.AT5G55160.2 RUB1	CCP2	RAD23C	DDI1	BAG4	UBQ5	SAY1	AT4G23040	SUMO1	RAD23D	SUMO2
InterPro IPR011032 GroES-like superfamily 7 46 0.97 0.0042 3702.AT1G72680.1	3702.AT4G21580.1	3702.AT5G16970.1	3702.AT5G17000.1	3702.AT5G24760.1	3702.AT5G51970.1	3702.AT5G61510.1 CADG	AT4G21580	AER	AT5G17000	AT5G24760	AT5G51970	AT5G61510
InterPro IPR008238 Chorismate mutase	AroQ class	eukaryotic type 3 3 1.79 0.0155 3702.AT1G69370.1	3702.AT3G29200.1	3702.AT5G10870.1 CM3	CM1	CM2
InterPro IPR018038 Ribosomal protein L30	conserved site 3 3 1.79 0.0155 3702.AT2G01250.1	3702.AT2G44120.2	3702.AT3G13580.3 AT2G01250	AT2G44120	AT3G13580
InterPro IPR030373 Polyamine biosynthesis domain	conserved site 3 3 1.79 0.0155 3702.AT1G23820.1	3702.AT1G70310.1	3702.AT5G53120.6 SPDS1	SPDS2	SPDS3
InterPro IPR030668 Spermidine/spermine synthase	eukaryotes 3 3 1.79 0.0155 3702.AT1G23820.1	3702.AT1G70310.1	3702.AT5G53120.6 SPDS1	SPDS2	SPDS3
InterPro IPR036263 Chorismate mutase type II superfamily 3 3 1.79 0.0155 3702.AT1G69370.1	3702.AT3G29200.1	3702.AT5G10870.1 CM3	CM1	CM2
InterPro IPR037039 Chorismate mutase	AroQ class superfamily	eukaryotic 3 3 1.79 0.0155 3702.AT1G69370.1	3702.AT3G29200.1	3702.AT5G10870.1 CM3	CM1	CM2
InterPro IPR029068 Glyoxalase/Bleomycin resistance protein/Dihydroxybiphenyl dioxygenase 4 13 1.28 0.0212 3702.AT1G06570.1	3702.AT1G11840.6	3702.AT1G67280.1	3702.AT5G48480.1 PDS1	GLX1	AT1G67280	AT5G48480
InterPro IPR000626 Ubiquitin-like domain 8 89 0.74 0.0215 3702.AT1G31340.1	3702.AT3G02540.1	3702.AT3G13235.1	3702.AT3G51780.1	3702.AT3G62250.1	3702.AT4G26840.1	3702.AT5G38470.1	3702.AT5G55160.2 RUB1	RAD23C	DDI1	BAG4	UBQ5	SUMO1	RAD23D	SUMO2
InterPro IPR001045 Spermidine/spermine synthases 3 4 1.67 0.0215 3702.AT1G23820.1	3702.AT1G70310.1	3702.AT5G53120.6 SPDS1	SPDS2	SPDS3
InterPro IPR001732 UDP-glucose/GDP-mannose dehydrogenase	N-terminal 3 4 1.67 0.0215 3702.AT1G26570.1	3702.AT3G29360.1	3702.AT5G15490.1 UGD1	UGD2	UGD3
InterPro IPR005998 Ribosomal protein L7	eukaryotic 3 4 1.67 0.0215 3702.AT2G01250.1	3702.AT2G44120.2	3702.AT3G13580.3 AT2G01250	AT2G44120	AT3G13580
InterPro IPR011183 Pyrophosphate-dependent phosphofructokinase PfpB 3 4 1.67 0.0215 3702.AT1G12000.1	3702.AT1G76550.1	3702.AT4G04040.1 AT1G12000	AT1G76550	MEE51
InterPro IPR012988 Ribosomal protein L30	N-terminal 3 4 1.67 0.0215 3702.AT2G01250.1	3702.AT2G44120.2	3702.AT3G13580.3 AT2G01250	AT2G44120	AT3G13580
InterPro IPR013154 Alcohol dehydrogenase	N-terminal 5 28 1.04 0.0215 3702.AT1G72680.1	3702.AT4G21580.1	3702.AT5G24760.1	3702.AT5G51970.1	3702.AT5G61510.1 CADG	AT4G21580	AT5G24760	AT5G51970	AT5G61510
InterPro IPR014026 UDP-glucose/GDP-mannose dehydrogenase	dimerisation 3 4 1.67 0.0215 3702.AT1G26570.1	3702.AT3G29360.1	3702.AT5G15490.1 UGD1	UGD2	UGD3
InterPro IPR015701 Ferredoxin--NADP reductase 3 4 1.67 0.0215 3702.AT1G20020.1	3702.AT1G30510.2	3702.AT4G05390.1 FNR2	RFNR2	RFNR1
InterPro IPR018129 Phosphoenolpyruvate carboxylase	Lys active site 3 4 1.67 0.0215 3702.AT1G53310.3	3702.AT2G42600.1	3702.AT3G14940.1 PPC1	PPC2	PPC3
InterPro IPR022805 Phosphoenolpyruvate carboxylase	bacterial/plant-type 3 4 1.67 0.0215 3702.AT1G53310.3	3702.AT2G42600.1	3702.AT3G14940.1 PPC1	PPC2	PPC3
InterPro IPR030374 Polyamine biosynthesis domain 3 4 1.67 0.0215 3702.AT1G23820.1	3702.AT1G70310.1	3702.AT5G53120.6 SPDS1	SPDS2	SPDS3
InterPro IPR033129 Phosphoenolpyruvate carboxylase	His active site 3 4 1.67 0.0215 3702.AT1G53310.3	3702.AT2G42600.1	3702.AT3G14940.1 PPC1	PPC2	PPC3
InterPro IPR035246 Spermidine synthase	tetramerisation domain 3 4 1.67 0.0215 3702.AT1G23820.1	3702.AT1G70310.1	3702.AT5G53120.6 SPDS1	SPDS2	SPDS3
InterPro IPR035442 Ferredoxin--NADP reductase	plant and Cyanobacteria type 3 4 1.67 0.0215 3702.AT1G20020.1	3702.AT1G30510.2	3702.AT4G05390.1 FNR2	RFNR2	RFNR1
InterPro IPR035808 Ribosomal protein L7	eukaryotic/archaeal 3 4 1.67 0.0215 3702.AT2G01250.1	3702.AT2G44120.2	3702.AT3G13580.3 AT2G01250	AT2G44120	AT3G13580
InterPro IPR037163 Spermidine synthase	tetramerisation domain superfamily 3 4 1.67 0.0215 3702.AT1G23820.1	3702.AT1G70310.1	3702.AT5G53120.6 SPDS1	SPDS2	SPDS3
InterPro IPR039699 Ribosomal protein L7/L30 3 4 1.67 0.0215 3702.AT2G01250.1	3702.AT2G44120.2	3702.AT3G13580.3 AT2G01250	AT2G44120	AT3G13580
InterPro IPR011013 Galactose mutarotase-like domain superfamily 5 30 1.01 0.0225 3702.AT3G01590.2	3702.AT3G26720.1	3702.AT3G54440.3	3702.AT5G11720.1	3702.AT5G57330.1 AT3G01590	AT3G26720	AT3G54440	AT5G11720	AT5G57330
InterPro IPR014027 UDP-glucose/GDP-mannose dehydrogenase	C-terminal 3 5 1.57 0.0225 3702.AT1G26570.1	3702.AT3G29360.1	3702.AT5G15490.1 UGD1	UGD2	UGD3
InterPro IPR015815 3-hydroxyisobutyrate dehydrogenase-related 3 5 1.57 0.0225 3702.AT1G71170.1	3702.AT3G25530.1	3702.AT4G29120.1 AT1G71170	GLYR1	AT4G29120
InterPro IPR016082 Ribosomal protein L30	ferredoxin-like fold domain 3 5 1.57 0.0225 3702.AT2G01250.1	3702.AT2G44120.2	3702.AT3G13580.3 AT2G01250	AT2G44120	AT3G13580
InterPro IPR017476 UDP-glucose/GDP-mannose dehydrogenase 3 5 1.57 0.0225 3702.AT1G26570.1	3702.AT3G29360.1	3702.AT5G15490.1 UGD1	UGD2	UGD3
InterPro IPR021135 Phosphoenolpyruvate carboxylase 3 5 1.57 0.0225 3702.AT1G53310.3	3702.AT2G42600.1	3702.AT3G14940.1 PPC1	PPC2	PPC3
InterPro IPR024286 Domain of unknown function DUF3700 3 5 1.57 0.0225 3702.AT3G22850.1	3702.AT5G19140.1	3702.AT5G43830.1 AT3G22850	AILP1	AT5G43830
InterPro IPR025131 Domain of unknown function DUF4057 3 5 1.57 0.0225 3702.AT1G35780.1	3702.AT1G78150.3	3702.AT4G39860.1 AT1G35780	AT1G78150	AT4G39860
InterPro IPR028356 UDP-glucose 6-dehydrogenase	eukaryotic type 3 5 1.57 0.0225 3702.AT1G26570.1	3702.AT3G29360.1	3702.AT5G15490.1 UGD1	UGD2	UGD3
InterPro IPR036220 UDP-glucose/GDP-mannose dehydrogenase	C-terminal domain superfamily 3 5 1.57 0.0225 3702.AT1G26570.1	3702.AT3G29360.1	3702.AT5G15490.1 UGD1	UGD2	UGD3
InterPro IPR036919 Ribosomal protein L30	ferredoxin-like fold domain superfamily 3 5 1.57 0.0225 3702.AT2G01250.1	3702.AT2G44120.2	3702.AT3G13580.3 AT2G01250	AT2G44120	AT3G13580
InterPro IPR008991 Translation protein SH3-like domain superfamily 5 32 0.98 0.0252 3702.AT1G18540.1	3702.AT1G74050.1	3702.AT4G15000.1	3702.AT4G36130.1	3702.AT5G67510.1 AT1G18540	AT1G74050	AT4G15000	AT4G36130	AT5G67510
InterPro IPR036249 Thioredoxin-like superfamily 13 247 0.51 0.0261 3702.AT1G19570.1	3702.AT1G20225.1	3702.AT1G78380.1	3702.AT2G02390.3	3702.AT2G15570.2	3702.AT2G29450.1	3702.AT2G30860.1	3702.AT2G30870.1	3702.AT3G15360.1	3702.AT5G06290.1	3702.AT5G20500.1	3702.AT5G40370.2	3702.AT5G42980.1 DHAR1	AT1G20225	GSTU19	GSTZ1	ATHM3	GSTU5	GSTF9	GSTF10	TRX-M4	At5g06290	AT5G20500	GRXC2	TRX3
InterPro IPR000674 Aldehyde oxidase/xanthine dehydrogenase	a/b hammerhead 3 6 1.49 0.0267 3702.AT2G27150.2	3702.AT3G43600.1	3702.AT4G34890.1 AAO3	AAO2	XDH1
InterPro IPR002346 Molybdopterin dehydrogenase	FAD-binding 3 6 1.49 0.0267 3702.AT2G27150.2	3702.AT3G43600.1	3702.AT4G34890.1 AAO3	AAO2	XDH1
InterPro IPR002888 [2Fe-2S]-binding 3 6 1.49 0.0267 3702.AT2G27150.2	3702.AT3G43600.1	3702.AT4G34890.1 AAO3	AAO2	XDH1
InterPro IPR005107 CO dehydrogenase flavoprotein	C-terminal 3 6 1.49 0.0267 3702.AT2G27150.2	3702.AT3G43600.1	3702.AT4G34890.1 AAO3	AAO2	XDH1
InterPro IPR008162 Inorganic pyrophosphatase 3 6 1.49 0.0267 3702.AT1G01050.1	3702.AT2G18230.1	3702.AT3G53620.1 PPa1	PPa2	PPa4
InterPro IPR036649 Inorganic pyrophosphatase superfamily 3 6 1.49 0.0267 3702.AT1G01050.1	3702.AT2G18230.1	3702.AT3G53620.1 PPa1	PPa2	PPa4
InterPro IPR036683 CO dehydrogenase flavoprotein	C-terminal domain superfamily 3 6 1.49 0.0267 3702.AT2G27150.2	3702.AT3G43600.1	3702.AT4G34890.1 AAO3	AAO2	XDH1
InterPro IPR036856 Aldehyde oxidase/xanthine dehydrogenase	a/b hammerhead superfamily 3 6 1.49 0.0267 3702.AT2G27150.2	3702.AT3G43600.1	3702.AT4G34890.1 AAO3	AAO2	XDH1
InterPro IPR036884 [2Fe-2S]-binding domain superfamily 3 6 1.49 0.0267 3702.AT2G27150.2	3702.AT3G43600.1	3702.AT4G34890.1 AAO3	AAO2	XDH1
InterPro IPR006424 Glyceraldehyde-3-phosphate dehydrogenase	type I 3 7 1.42 0.0332 3702.AT1G12900.1	3702.AT1G13440.1	3702.AT1G42970.1 GAPA-2	GAPC2	GAPB
InterPro IPR020828 Glyceraldehyde 3-phosphate dehydrogenase	NAD(P) binding domain 3 7 1.42 0.0332 3702.AT1G12900.1	3702.AT1G13440.1	3702.AT1G42970.1 GAPA-2	GAPC2	GAPB
InterPro IPR020829 Glyceraldehyde 3-phosphate dehydrogenase	catalytic domain 3 7 1.42 0.0332 3702.AT1G12900.1	3702.AT1G13440.1	3702.AT1G42970.1 GAPA-2	GAPC2	GAPB
InterPro IPR020830 Glyceraldehyde 3-phosphate dehydrogenase	active site 3 7 1.42 0.0332 3702.AT1G12900.1	3702.AT1G13440.1	3702.AT1G42970.1 GAPA-2	GAPC2	GAPB
InterPro IPR020831 Glyceraldehyde/Erythrose phosphate dehydrogenase family 3 7 1.42 0.0332 3702.AT1G12900.1	3702.AT1G13440.1	3702.AT1G42970.1 GAPA-2	GAPC2	GAPB
InterPro IPR029154 3-hydroxyisobutyrate dehydrogenase	NAD-binding domain 3 7 1.42 0.0332 3702.AT1G71170.1	3702.AT3G25530.1	3702.AT4G29120.1 AT1G71170	GLYR1	AT4G29120
InterPro IPR011332 Zinc-binding ribosomal protein 4 20 1.09 0.0364 3702.AT3G16080.1	3702.AT3G60245.1	3702.AT3G61110.1	3702.AT3G62250.1 AT3G16080	AT3G60245	RS27A	UBQ5
InterPro IPR010987 Glutathione S-transferase	C-terminal-like 6 59 0.8 0.0405 3702.AT1G19570.1	3702.AT1G78380.1	3702.AT2G02390.3	3702.AT2G29450.1	3702.AT2G30860.1	3702.AT2G30870.1 DHAR1	GSTU19	GSTZ1	GSTU5	GSTF9	GSTF10
InterPro IPR029752 D-isomer specific 2-hydroxyacid dehydrogenase	NAD-binding domain conserved site 1 3 8 1.36 0.0408 3702.AT1G05350.1	3702.AT1G72680.1	3702.AT4G34200.1 AT1G05350	CADG	EDA9
InterPro IPR040079 Glutathione Transferase family 5 40 0.89 0.0485 3702.AT1G19570.1	3702.AT2G02390.3	3702.AT2G29450.1	3702.AT2G30860.1	3702.AT2G30870.1 DHAR1	GSTZ1	GSTU5	GSTF9	GSTF10
SMART SM00948 Proteasome subunit A N-terminal signature Add an annotation 6 11 1.53 9.08e-05 3702.AT1G79210.2	3702.AT2G05840.1	3702.AT3G22110.1	3702.AT3G51260.1	3702.AT5G35590.1	3702.AT5G42790.1 AT1G79210	At2g05840	PAC1	PAD1	At5g35590	PAF1
SMART SM00101 14-3-3 homologues 6 14 1.42 0.00014 3702.AT1G35160.2	3702.AT1G78300.1	3702.AT2G42590.3	3702.AT4G09000.2	3702.AT5G16050.1	3702.AT5G38480.1 At1g35160	GF14	At2g42590	At4g09000	At5g16050	RCI1A
SMART SM00213 Ubiquitin homologues 8 59 0.92 0.0020 3702.AT1G31340.1	3702.AT3G02540.1	3702.AT3G13235.1	3702.AT3G51780.1	3702.AT3G62250.1	3702.AT4G26840.1	3702.AT5G38470.1	3702.AT5G55160.2 RUB1	RAD23C	DDI1	BAG4	UBQ5	SUMO1	RAD23D	SUMO2
SMART SM00984 UDP binding domain 3 5 1.57 0.0285 3702.AT1G26570.1	3702.AT3G29360.1	3702.AT5G15490.1 UGD1	UGD2	UGD3
SMART SM01008 Aldehyde oxidase and xanthine dehydrogenase	a/b hammerhead domain 3 6 1.49 0.0285 3702.AT2G27150.2	3702.AT3G43600.1	3702.AT4G34890.1 AAO3	AAO2	XDH1
SMART SM01092 CO dehydrogenase flavoprotein C-terminal domain 3 6 1.49 0.0285 3702.AT2G27150.2	3702.AT3G43600.1	3702.AT4G34890.1 AAO3	AAO2	XDH1
SMART SM01172 This domain family is found in eukaryotes	and is approximately 120 amino acids in length. There are two conserved sequence motifs: YGL and LRDR. This family is related to GATase enzyme domains. 3 5 1.57 0.0285 3702.AT3G22850.1	3702.AT5G19140.1	3702.AT5G43830.1 AT3G22850	AILP1	AT5G43830
SMART SM00846 Glyceraldehyde 3-phosphate dehydrogenase	NAD binding domain 3 7 1.42 0.0298 3702.AT1G12900.1	3702.AT1G13440.1	3702.AT1G42970.1 GAPA-2	GAPC2	GAPB
[truncated: 647 more columns]

## Sheet: SM2
Supplemental material SM2: STRING enrichment analysis: proteins downregulated in the cytosol
#category term ID term description observed gene count background gene count strength false discovery rate matching proteins in your network (IDs) matching proteins in your network (labels)
GO Process GO:0009987 Cellular process 927 11004 0.23 2.34e-87 3702.AT1G01090.1	3702.AT1G01290.1	3702.AT1G01820.1	3702.AT1G01910.4	3702.AT1G01940.1	3702.AT1G01960.1	3702.AT1G02130.1	3702.AT1G02140.1	3702.AT1G02305.1	3702.AT1G02500.1	3702.AT1G02690.2	3702.AT1G02840.1	3702.AT1G02920.1	3702.AT1G02930.1	3702.AT1G04270.1	3702.AT1G04710.1	3702.AT1G04810.1	3702.AT1G04870.2	3702.AT1G05010.1	3702.AT1G06210.1	3702.AT1G06220.2	3702.AT1G06400.1	3702.AT1G06760.1	3702.AT1G07140.1	3702.AT1G07670.1	3702.AT1G07890.8	3702.AT1G08130.1	3702.AT1G08370.1	3702.AT1G08420.1	3702.AT1G08450.1	3702.AT1G08480.1	3702.AT1G08880.1	3702.AT1G09210.1	3702.AT1G09270.1	3702.AT1G09620.1	3702.AT1G09640.1	3702.AT1G09760.1	3702.AT1G09770.1	3702.AT1G09780.1	3702.AT1G10200.1	3702.AT1G10290.1	3702.AT1G10840.1	3702.AT1G10940.2	3702.AT1G11260.1	3702.AT1G11650.2	3702.AT1G11860.3	3702.AT1G11890.1	3702.AT1G12270.1	3702.AT1G12920.1	3702.AT1G13320.3
GO Process GO:0044237 Cellular metabolic process 610 6729 0.26 9.30e-53 3702.AT1G01090.1	3702.AT1G01290.1	3702.AT1G01940.1	3702.AT1G02140.1	3702.AT1G02305.1	3702.AT1G02500.1	3702.AT1G02840.1	3702.AT1G02920.1	3702.AT1G02930.1	3702.AT1G04270.1	3702.AT1G04710.1	3702.AT1G04810.1	3702.AT1G04870.2	3702.AT1G05010.1	3702.AT1G06220.2	3702.AT1G07890.8	3702.AT1G08130.1	3702.AT1G08370.1	3702.AT1G08420.1	3702.AT1G08480.1	3702.AT1G09620.1	3702.AT1G09640.1	3702.AT1G09760.1	3702.AT1G09770.1	3702.AT1G09780.1	3702.AT1G10840.1	3702.AT1G10940.2	3702.AT1G11650.2	3702.AT1G11860.3	3702.AT1G12920.1	3702.AT1G13320.3	3702.AT1G13950.1	3702.AT1G15130.1	3702.AT1G16300.1	3702.AT1G16350.1	3702.AT1G16890.3	3702.AT1G17710.1	3702.AT1G18450.1	3702.AT1G18500.1	3702.AT1G18630.1	3702.AT1G20200.1	3702.AT1G20510.1	3702.AT1G20960.1	3702.AT1G21690.3	3702.AT1G22920.1	3702.AT1G25350.2	3702.AT1G25490.1	3702.AT1G26110.1	3702.AT1G26630.1	3702.AT1G27450.3
GO Process GO:0006807 Nitrogen compound metabolic process 521 5335 0.29 1.76e-51 3702.AT1G01090.1	3702.AT1G01290.1	3702.AT1G01300.1	3702.AT1G01940.1	3702.AT1G02140.1	3702.AT1G02305.1	3702.AT1G02840.1	3702.AT1G02920.1	3702.AT1G02930.1	3702.AT1G04270.1	3702.AT1G04810.1	3702.AT1G04870.2	3702.AT1G06220.2	3702.AT1G06900.1	3702.AT1G08130.1	3702.AT1G08370.1	3702.AT1G08420.1	3702.AT1G09300.1	3702.AT1G09620.1	3702.AT1G09640.1	3702.AT1G09760.1	3702.AT1G09770.1	3702.AT1G09780.1	3702.AT1G10840.1	3702.AT1G10940.2	3702.AT1G11650.2	3702.AT1G11860.3	3702.AT1G12920.1	3702.AT1G13320.3	3702.AT1G13950.1	3702.AT1G15130.1	3702.AT1G16300.1	3702.AT1G16350.1	3702.AT1G16890.3	3702.AT1G18450.1	3702.AT1G18500.1	3702.AT1G18630.1	3702.AT1G20200.1	3702.AT1G20960.1	3702.AT1G21690.3	3702.AT1G22920.1	3702.AT1G25350.2	3702.AT1G25490.1	3702.AT1G26110.1	3702.AT1G26630.1	3702.AT1G27450.3	3702.AT1G28120.1	3702.AT1G29150.1	3702.AT1G30230.2	3702.AT1G30680.1
GO Process GO:0071704 Organic substance metabolic process 609 6962 0.25 1.07e-47 3702.AT1G01090.1	3702.AT1G01290.1	3702.AT1G01300.1	3702.AT1G01940.1	3702.AT1G02140.1	3702.AT1G02305.1	3702.AT1G02500.1	3702.AT1G02840.1	3702.AT1G02920.1	3702.AT1G02930.1	3702.AT1G04270.1	3702.AT1G04710.1	3702.AT1G04810.1	3702.AT1G04870.2	3702.AT1G05010.1	3702.AT1G06220.2	3702.AT1G06900.1	3702.AT1G07890.8	3702.AT1G08130.1	3702.AT1G08370.1	3702.AT1G08420.1	3702.AT1G08450.1	3702.AT1G09300.1	3702.AT1G09620.1	3702.AT1G09640.1	3702.AT1G09760.1	3702.AT1G09770.1	3702.AT1G09780.1	3702.AT1G10670.3	3702.AT1G10840.1	3702.AT1G10940.2	3702.AT1G11650.2	3702.AT1G11860.3	3702.AT1G12920.1	3702.AT1G13320.3	3702.AT1G13950.1	3702.AT1G15130.1	3702.AT1G16300.1	3702.AT1G16350.1	3702.AT1G16890.3	3702.AT1G18450.1	3702.AT1G18500.1	3702.AT1G18630.1	3702.AT1G20200.1	3702.AT1G20330.1	3702.AT1G20510.1	3702.AT1G20960.1	3702.AT1G21690.3	3702.AT1G22920.1	3702.AT1G25350.2
GO Process GO:0034641 Cellular nitrogen compound metabolic process 311 2435 0.41 2.22e-47 3702.AT1G01090.1	3702.AT1G02140.1	3702.AT1G02840.1	3702.AT1G02920.1	3702.AT1G02930.1	3702.AT1G04270.1	3702.AT1G06220.2	3702.AT1G08130.1	3702.AT1G08370.1	3702.AT1G09620.1	3702.AT1G09640.1	3702.AT1G09760.1	3702.AT1G09770.1	3702.AT1G09780.1	3702.AT1G10840.1	3702.AT1G11650.2	3702.AT1G12920.1	3702.AT1G13950.1	3702.AT1G16300.1	3702.AT1G16350.1	3702.AT1G16890.3	3702.AT1G18630.1	3702.AT1G20960.1	3702.AT1G21690.3	3702.AT1G25350.2	3702.AT1G26110.1	3702.AT1G26630.1	3702.AT1G27450.3	3702.AT1G30230.2	3702.AT1G30680.1	3702.AT1G31070.2	3702.AT1G31817.1	3702.AT1G31860.1	3702.AT1G32440.1	3702.AT1G32490.1	3702.AT1G36730.1	3702.AT1G37130.1	3702.AT1G43190.1	3702.AT1G43710.1	3702.AT1G44790.1	3702.AT1G44900.1	3702.AT1G44910.1	3702.AT1G48410.2	3702.AT1G48520.1	3702.AT1G48920.1	3702.AT1G49600.1	3702.AT1G50200.1	3702.AT1G51510.1	3702.AT1G53500.1	3702.AT1G54270.1
GO Process GO:0008152 Metabolic process 662 7962 0.22 2.25e-46 3702.AT1G01090.1	3702.AT1G01290.1	3702.AT1G01300.1	3702.AT1G01940.1	3702.AT1G02140.1	3702.AT1G02305.1	3702.AT1G02500.1	3702.AT1G02840.1	3702.AT1G02920.1	3702.AT1G02930.1	3702.AT1G04270.1	3702.AT1G04430.1	3702.AT1G04710.1	3702.AT1G04810.1	3702.AT1G04870.2	3702.AT1G05010.1	3702.AT1G06220.2	3702.AT1G06900.1	3702.AT1G07890.8	3702.AT1G08130.1	3702.AT1G08370.1	3702.AT1G08420.1	3702.AT1G08450.1	3702.AT1G08480.1	3702.AT1G09300.1	3702.AT1G09620.1	3702.AT1G09640.1	3702.AT1G09760.1	3702.AT1G09770.1	3702.AT1G09780.1	3702.AT1G10670.3	3702.AT1G10840.1	3702.AT1G10940.2	3702.AT1G11650.2	3702.AT1G11860.3	3702.AT1G12920.1	3702.AT1G13320.3	3702.AT1G13950.1	3702.AT1G15130.1	3702.AT1G15220.2	3702.AT1G16300.1	3702.AT1G16350.1	3702.AT1G16890.3	3702.AT1G17710.1	3702.AT1G18450.1	3702.AT1G18500.1	3702.AT1G18630.1	3702.AT1G20200.1	3702.AT1G20330.1	3702.AT1G20510.1
GO Process GO:0044238 Primary metabolic process 568 6374 0.25 1.03e-45 3702.AT1G01090.1	3702.AT1G01290.1	3702.AT1G01300.1	3702.AT1G01940.1	3702.AT1G02140.1	3702.AT1G02305.1	3702.AT1G02840.1	3702.AT1G04270.1	3702.AT1G04710.1	3702.AT1G04810.1	3702.AT1G04870.2	3702.AT1G06220.2	3702.AT1G06900.1	3702.AT1G08130.1	3702.AT1G08370.1	3702.AT1G08420.1	3702.AT1G08480.1	3702.AT1G09300.1	3702.AT1G09620.1	3702.AT1G09640.1	3702.AT1G09760.1	3702.AT1G09770.1	3702.AT1G09780.1	3702.AT1G10670.3	3702.AT1G10840.1	3702.AT1G10940.2	3702.AT1G11650.2	3702.AT1G11860.3	3702.AT1G12920.1	3702.AT1G13320.3	3702.AT1G13950.1	3702.AT1G15130.1	3702.AT1G16300.1	3702.AT1G16350.1	3702.AT1G16890.3	3702.AT1G18450.1	3702.AT1G18500.1	3702.AT1G18630.1	3702.AT1G20200.1	3702.AT1G20330.1	3702.AT1G20960.1	3702.AT1G21690.3	3702.AT1G22920.1	3702.AT1G25350.2	3702.AT1G25490.1	3702.AT1G26110.1	3702.AT1G26630.1	3702.AT1G27450.3	3702.AT1G28120.1	3702.AT1G29150.1
GO Process GO:0033036 Macromolecule localization 176 913 0.59 3.47e-45 3702.AT1G01910.4	3702.AT1G01960.1	3702.AT1G02130.1	3702.AT1G02140.1	3702.AT1G02690.2	3702.AT1G06210.1	3702.AT1G06400.1	3702.AT1G07140.1	3702.AT1G09270.1	3702.AT1G11890.1	3702.AT1G15130.1	3702.AT1G20110.1	3702.AT1G21380.1	3702.AT1G22530.1	3702.AT1G30630.1	3702.AT1G30690.2	3702.AT1G31730.1	3702.AT1G32050.1	3702.AT1G47550.2	3702.AT1G48160.1	3702.AT1G48900.1	3702.AT1G50500.2	3702.AT1G51510.1	3702.AT1G52360.2	3702.AT1G55900.1	3702.AT1G59870.1	3702.AT1G60070.2	3702.AT1G60780.1	3702.AT1G61250.1	3702.AT1G62020.1	3702.AT1G66260.2	3702.AT1G67120.1	3702.AT1G70490.3	3702.AT1G72750.1	3702.AT1G73030.1	3702.AT1G77140.1	3702.AT1G79280.2	3702.AT1G79990.1	3702.AT2G01970.1	3702.AT2G04030.1	3702.AT2G13540.1	3702.AT2G14720.2	3702.AT2G14740.1	3702.AT2G16640.1	3702.AT2G16950.1	3702.AT2G17380.1	3702.AT2G17390.1	3702.AT2G17980.1	3702.AT2G19760.1	3702.AT2G20890.1
GO Process GO:0008104 Protein localization 153 736 0.62 2.43e-42 3702.AT1G01910.4	3702.AT1G01960.1	3702.AT1G02130.1	3702.AT1G02690.2	3702.AT1G06210.1	3702.AT1G06400.1	3702.AT1G07140.1	3702.AT1G09270.1	3702.AT1G11890.1	3702.AT1G15130.1	3702.AT1G20110.1	3702.AT1G21380.1	3702.AT1G22530.1	3702.AT1G30630.1	3702.AT1G30690.2	3702.AT1G31730.1	3702.AT1G32050.1	3702.AT1G47550.2	3702.AT1G48160.1	3702.AT1G48900.1	3702.AT1G50500.2	3702.AT1G52360.2	3702.AT1G55900.1	3702.AT1G60070.2	3702.AT1G60780.1	3702.AT1G61250.1	3702.AT1G62020.1	3702.AT1G67120.1	3702.AT1G70490.3	3702.AT1G72750.1	3702.AT1G73030.1	3702.AT1G77140.1	3702.AT1G79280.2	3702.AT1G79990.1	3702.AT2G01970.1	3702.AT2G04030.1	3702.AT2G14720.2	3702.AT2G14740.1	3702.AT2G16640.1	3702.AT2G16950.1	3702.AT2G17380.1	3702.AT2G17390.1	3702.AT2G17980.1	3702.AT2G19760.1	3702.AT2G20890.1	3702.AT2G21390.1	3702.AT2G21660.1	3702.AT2G22125.1	3702.AT2G27600.1	3702.AT2G30050.1
GO Process GO:1901360 Organic cyclic compound metabolic process 277 2229 0.4 1.13e-39 3702.AT1G01090.1	3702.AT1G01290.1	3702.AT1G02140.1	3702.AT1G02840.1	3702.AT1G04710.1	3702.AT1G06220.2	3702.AT1G07890.8	3702.AT1G08130.1	3702.AT1G08370.1	3702.AT1G09620.1	3702.AT1G09760.1	3702.AT1G09770.1	3702.AT1G09780.1	3702.AT1G11650.2	3702.AT1G16300.1	3702.AT1G16350.1	3702.AT1G16890.3	3702.AT1G18630.1	3702.AT1G20330.1	3702.AT1G20960.1	3702.AT1G21690.3	3702.AT1G25350.2	3702.AT1G26110.1	3702.AT1G27450.3	3702.AT1G30680.1	3702.AT1G31070.2	3702.AT1G31817.1	3702.AT1G31860.1	3702.AT1G32440.1	3702.AT1G32490.1	3702.AT1G43190.1	3702.AT1G44900.1	3702.AT1G44910.1	3702.AT1G48410.2	3702.AT1G48520.1	3702.AT1G48850.1	3702.AT1G48920.1	3702.AT1G49600.1	3702.AT1G50200.1	3702.AT1G51510.1	3702.AT1G51680.1	3702.AT1G52340.1	3702.AT1G52760.1	3702.AT1G53500.1	3702.AT1G55150.1	3702.AT1G58080.1	3702.AT1G59760.1	3702.AT1G59870.1	3702.AT1G60810.1	3702.AT1G63000.1
GO Process GO:0051641 Cellular localization 150 753 0.6 1.30e-39 3702.AT1G01910.4	3702.AT1G02130.1	3702.AT1G02690.2	3702.AT1G06210.1	3702.AT1G06400.1	3702.AT1G07140.1	3702.AT1G09270.1	3702.AT1G10290.1	3702.AT1G11890.1	3702.AT1G15130.1	3702.AT1G21380.1	3702.AT1G30630.1	3702.AT1G31730.1	3702.AT1G43700.1	3702.AT1G47550.2	3702.AT1G48160.1	3702.AT1G48900.1	3702.AT1G50500.2	3702.AT1G52360.2	3702.AT1G55900.1	3702.AT1G59870.1	3702.AT1G60070.2	3702.AT1G60780.1	3702.AT1G62020.1	3702.AT1G67120.1	3702.AT1G70490.3	3702.AT1G72750.1	3702.AT1G73030.1	3702.AT1G77140.1	3702.AT1G79280.2	3702.AT1G79990.1	3702.AT2G01970.1	3702.AT2G04030.1	3702.AT2G14720.2	3702.AT2G14740.1	3702.AT2G16640.1	3702.AT2G16950.1	3702.AT2G17380.1	3702.AT2G17390.1	3702.AT2G17980.1	3702.AT2G19760.1	3702.AT2G20890.1	3702.AT2G21390.1	3702.AT2G21660.1	3702.AT2G22125.1	3702.AT2G30050.1	3702.AT2G30060.1	3702.AT2G31660.1	3702.AT2G35795.1	3702.AT2G36070.1
GO Process GO:0045184 Establishment of protein localization 141 668 0.63 1.47e-39 3702.AT1G01910.4	3702.AT1G01960.1	3702.AT1G02130.1	3702.AT1G02690.2	3702.AT1G06210.1	3702.AT1G06400.1	3702.AT1G07140.1	3702.AT1G09270.1	3702.AT1G11890.1	3702.AT1G15130.1	3702.AT1G20110.1	3702.AT1G21380.1	3702.AT1G30630.1	3702.AT1G31730.1	3702.AT1G32050.1	3702.AT1G48160.1	3702.AT1G48900.1	3702.AT1G50500.2	3702.AT1G52360.2	3702.AT1G55900.1	3702.AT1G60070.2	3702.AT1G60780.1	3702.AT1G61250.1	3702.AT1G62020.1	3702.AT1G67120.1	3702.AT1G70490.3	3702.AT1G72750.1	3702.AT1G73030.1	3702.AT1G77140.1	3702.AT1G79280.2	3702.AT1G79990.1	3702.AT2G04030.1	3702.AT2G14720.2	3702.AT2G14740.1	3702.AT2G16640.1	3702.AT2G16950.1	3702.AT2G17380.1	3702.AT2G17390.1	3702.AT2G17980.1	3702.AT2G20890.1	3702.AT2G21390.1	3702.AT2G21660.1	3702.AT2G27600.1	3702.AT2G30050.1	3702.AT2G30060.1	3702.AT2G31660.1	3702.AT2G33120.2	3702.AT2G35795.1	3702.AT2G36070.1	3702.AT2G37410.1
GO Process GO:0015031 Protein transport 140 661 0.63 1.93e-39 3702.AT1G01910.4	3702.AT1G01960.1	3702.AT1G02130.1	3702.AT1G02690.2	3702.AT1G06210.1	3702.AT1G06400.1	3702.AT1G07140.1	3702.AT1G09270.1	3702.AT1G11890.1	3702.AT1G15130.1	3702.AT1G20110.1	3702.AT1G21380.1	3702.AT1G30630.1	3702.AT1G31730.1	3702.AT1G32050.1	3702.AT1G48160.1	3702.AT1G48900.1	3702.AT1G50500.2	3702.AT1G52360.2	3702.AT1G55900.1	3702.AT1G60070.2	3702.AT1G60780.1	3702.AT1G61250.1	3702.AT1G62020.1	3702.AT1G67120.1	3702.AT1G70490.3	3702.AT1G72750.1	3702.AT1G73030.1	3702.AT1G77140.1	3702.AT1G79280.2	3702.AT1G79990.1	3702.AT2G04030.1	3702.AT2G14720.2	3702.AT2G14740.1	3702.AT2G16640.1	3702.AT2G16950.1	3702.AT2G17380.1	3702.AT2G17390.1	3702.AT2G17980.1	3702.AT2G20890.1	3702.AT2G21390.1	3702.AT2G21660.1	3702.AT2G27600.1	3702.AT2G30050.1	3702.AT2G30060.1	3702.AT2G31660.1	3702.AT2G33120.2	3702.AT2G35795.1	3702.AT2G36070.1	3702.AT2G37410.1
GO Process GO:0046483 Heterocycle metabolic process 259 2022 0.41 6.34e-39 3702.AT1G01090.1	3702.AT1G01290.1	3702.AT1G02140.1	3702.AT1G02840.1	3702.AT1G06220.2	3702.AT1G08130.1	3702.AT1G08370.1	3702.AT1G09620.1	3702.AT1G09760.1	3702.AT1G09770.1	3702.AT1G09780.1	3702.AT1G11650.2	3702.AT1G16300.1	3702.AT1G16350.1	3702.AT1G16890.3	3702.AT1G18630.1	3702.AT1G20960.1	3702.AT1G21690.3	3702.AT1G25350.2	3702.AT1G26110.1	3702.AT1G27450.3	3702.AT1G30680.1	3702.AT1G31070.2	3702.AT1G31817.1	3702.AT1G31860.1	3702.AT1G32440.1	3702.AT1G32490.1	3702.AT1G43190.1	3702.AT1G44900.1	3702.AT1G44910.1	3702.AT1G48410.2	3702.AT1G48520.1	3702.AT1G48920.1	3702.AT1G49600.1	3702.AT1G50200.1	3702.AT1G51510.1	3702.AT1G52340.1	3702.AT1G53500.1	3702.AT1G55150.1	3702.AT1G58080.1	3702.AT1G59760.1	3702.AT1G59870.1	3702.AT1G60810.1	3702.AT1G63000.1	3702.AT1G63020.2	3702.AT1G63160.1	3702.AT1G63210.1	3702.AT1G65440.1	3702.AT1G66260.2	3702.AT1G66530.1
GO Process GO:0046907 Intracellular transport 128 569 0.66 2.99e-38 3702.AT1G01910.4	3702.AT1G02130.1	3702.AT1G02690.2	3702.AT1G06210.1	3702.AT1G06400.1	3702.AT1G07140.1	3702.AT1G09270.1	3702.AT1G10290.1	3702.AT1G11890.1	3702.AT1G15130.1	3702.AT1G21380.1	3702.AT1G30630.1	3702.AT1G31730.1	3702.AT1G43700.1	3702.AT1G48160.1	3702.AT1G48900.1	3702.AT1G50500.2	3702.AT1G52360.2	3702.AT1G55900.1	3702.AT1G60070.2	3702.AT1G60780.1	3702.AT1G62020.1	3702.AT1G67120.1	3702.AT1G70490.3	3702.AT1G72750.1	3702.AT1G73030.1	3702.AT1G77140.1	3702.AT1G79280.2	3702.AT1G79990.1	3702.AT2G04030.1	3702.AT2G14720.2	3702.AT2G14740.1	3702.AT2G16640.1	3702.AT2G16950.1	3702.AT2G17380.1	3702.AT2G17390.1	3702.AT2G17980.1	3702.AT2G20890.1	3702.AT2G21390.1	3702.AT2G21660.1	3702.AT2G30050.1	3702.AT2G30060.1	3702.AT2G31660.1	3702.AT2G35795.1	3702.AT2G36070.1	3702.AT2G37410.1	3702.AT2G39960.1	3702.AT2G44610.1	3702.AT2G45000.1	3702.AT2G45140.1
GO Process GO:0051649 Establishment of localization in cell 133 621 0.63 7.05e-38 3702.AT1G01910.4	3702.AT1G02130.1	3702.AT1G02690.2	3702.AT1G06210.1	3702.AT1G06400.1	3702.AT1G07140.1	3702.AT1G09270.1	3702.AT1G10290.1	3702.AT1G11890.1	3702.AT1G15130.1	3702.AT1G21380.1	3702.AT1G30630.1	3702.AT1G31730.1	3702.AT1G43700.1	3702.AT1G48160.1	3702.AT1G48900.1	3702.AT1G50500.2	3702.AT1G52360.2	3702.AT1G55900.1	3702.AT1G60070.2	3702.AT1G60780.1	3702.AT1G62020.1	3702.AT1G67120.1	3702.AT1G70490.3	3702.AT1G72750.1	3702.AT1G73030.1	3702.AT1G77140.1	3702.AT1G79280.2	3702.AT1G79990.1	3702.AT2G04030.1	3702.AT2G14720.2	3702.AT2G14740.1	3702.AT2G16640.1	3702.AT2G16950.1	3702.AT2G17380.1	3702.AT2G17390.1	3702.AT2G17980.1	3702.AT2G20890.1	3702.AT2G21390.1	3702.AT2G21660.1	3702.AT2G30050.1	3702.AT2G30060.1	3702.AT2G31660.1	3702.AT2G35795.1	3702.AT2G36070.1	3702.AT2G37410.1	3702.AT2G39960.1	3702.AT2G44610.1	3702.AT2G45000.1	3702.AT2G45140.1
GO Process GO:0006725 Cellular aromatic compound metabolic process 265 2137 0.4 8.87e-38 3702.AT1G01090.1	3702.AT1G02140.1	3702.AT1G02840.1	3702.AT1G04710.1	3702.AT1G06220.2	3702.AT1G07890.8	3702.AT1G08130.1	3702.AT1G08370.1	3702.AT1G09620.1	3702.AT1G09760.1	3702.AT1G09770.1	3702.AT1G09780.1	3702.AT1G11650.2	3702.AT1G16300.1	3702.AT1G16350.1	3702.AT1G16890.3	3702.AT1G18630.1	3702.AT1G20960.1	3702.AT1G21690.3	3702.AT1G25350.2	3702.AT1G26110.1	3702.AT1G27450.3	3702.AT1G30680.1	3702.AT1G31070.2	3702.AT1G31817.1	3702.AT1G31860.1	3702.AT1G32440.1	3702.AT1G32490.1	3702.AT1G43190.1	3702.AT1G44900.1	3702.AT1G44910.1	3702.AT1G48410.2	3702.AT1G48520.1	3702.AT1G48850.1	3702.AT1G48920.1	3702.AT1G49600.1	3702.AT1G50200.1	3702.AT1G51510.1	3702.AT1G51680.1	3702.AT1G52760.1	3702.AT1G53500.1	3702.AT1G55150.1	3702.AT1G58080.1	3702.AT1G59760.1	3702.AT1G59870.1	3702.AT1G60810.1	3702.AT1G63000.1	3702.AT1G63020.2	3702.AT1G63160.1	3702.AT1G63210.1
GO Process GO:0042886 Amide transport 142 723 0.6 5.81e-37 3702.AT1G01910.4	3702.AT1G01960.1	3702.AT1G02130.1	3702.AT1G02690.2	3702.AT1G06210.1	3702.AT1G06400.1	3702.AT1G07140.1	3702.AT1G09270.1	3702.AT1G11890.1	3702.AT1G15130.1	3702.AT1G20110.1	3702.AT1G21380.1	3702.AT1G30630.1	3702.AT1G31730.1	3702.AT1G32050.1	3702.AT1G48160.1	3702.AT1G48900.1	3702.AT1G50500.2	3702.AT1G52360.2	3702.AT1G55900.1	3702.AT1G60070.2	3702.AT1G60780.1	3702.AT1G61250.1	3702.AT1G62020.1	3702.AT1G67120.1	3702.AT1G70490.3	3702.AT1G72750.1	3702.AT1G73030.1	3702.AT1G77140.1	3702.AT1G79280.2	3702.AT1G79990.1	3702.AT2G04030.1	3702.AT2G14720.2	3702.AT2G14740.1	3702.AT2G16640.1	3702.AT2G16950.1	3702.AT2G17380.1	3702.AT2G17390.1	3702.AT2G17980.1	3702.AT2G20890.1	3702.AT2G21390.1	3702.AT2G21660.1	3702.AT2G27600.1	3702.AT2G30050.1	3702.AT2G30060.1	3702.AT2G31660.1	3702.AT2G33120.2	3702.AT2G33470.1	3702.AT2G34690.1	3702.AT2G35795.1
GO Process GO:0046686 Response to cadmium ion 89 269 0.82 8.07e-37 3702.AT1G02130.1	3702.AT1G02500.1	3702.AT1G02920.1	3702.AT1G02930.1	3702.AT1G07890.8	3702.AT1G09780.1	3702.AT1G11860.3	3702.AT1G26630.1	3702.AT1G29150.1	3702.AT1G30580.1	3702.AT1G49760.1	3702.AT1G50200.1	3702.AT1G52760.1	3702.AT1G54270.1	3702.AT1G56340.1	3702.AT1G57720.1	3702.AT1G60420.1	3702.AT1G62740.1	3702.AT1G64550.1	3702.AT1G65980.1	3702.AT1G68560.1	3702.AT1G70490.3	3702.AT1G74560.3	3702.AT1G75280.1	3702.AT1G75950.1	3702.AT1G77510.1	3702.AT1G78870.1	3702.AT2G19480.1	3702.AT2G21660.1	3702.AT2G23350.1	3702.AT2G29550.1	3702.AT2G30110.1	3702.AT2G33800.1	3702.AT2G37760.1	3702.AT2G45290.1	3702.AT2G46280.1	3702.AT2G47470.1	3702.AT3G02530.1	3702.AT3G06930.2	3702.AT3G09440.1	3702.AT3G09840.1	3702.AT3G11830.1	3702.AT3G12580.1	3702.AT3G12780.1	3702.AT3G16640.1	3702.AT3G18190.1	3702.AT3G22890.1	3702.AT3G22960.1	3702.AT3G25800.1	3702.AT3G27300.2
GO Process GO:0071840 Cellular component organization or biogenesis 286 2482 0.36 6.36e-36 3702.AT1G01820.1	3702.AT1G01910.4	3702.AT1G04270.1	3702.AT1G04870.2	3702.AT1G06400.1	3702.AT1G06760.1	3702.AT1G08880.1	3702.AT1G10200.1	3702.AT1G10290.1	3702.AT1G10840.1	3702.AT1G11890.1	3702.AT1G12270.1	3702.AT1G12920.1	3702.AT1G14830.1	3702.AT1G15130.1	3702.AT1G15220.2	3702.AT1G17710.1	3702.AT1G18450.1	3702.AT1G19520.1	3702.AT1G20110.1	3702.AT1G20693.1	3702.AT1G20960.1	3702.AT1G22920.1	3702.AT1G26110.1	3702.AT1G29150.1	3702.AT1G30680.1	3702.AT1G31817.1	3702.AT1G36730.1	3702.AT1G44900.1	3702.AT1G47750.1	3702.AT1G48160.1	3702.AT1G48920.1	3702.AT1G50500.2	3702.AT1G51390.1	3702.AT1G51630.1	3702.AT1G55150.1	3702.AT1G55250.1	3702.AT1G55900.1	3702.AT1G59610.1	3702.AT1G59760.1	3702.AT1G59870.1	3702.AT1G62740.1	3702.AT1G63000.1	3702.AT1G63210.1	3702.AT1G64090.2	3702.AT1G64520.1	3702.AT1G64760.2	3702.AT1G65260.1	3702.AT1G65440.1	3702.AT1G66260.2
GO Process GO:0006139 Nucleobase-containing compound metabolic process 228 1736 0.42 2.19e-35 3702.AT1G01090.1	3702.AT1G02140.1	3702.AT1G02840.1	3702.AT1G06220.2	3702.AT1G08130.1	3702.AT1G08370.1	3702.AT1G09620.1	3702.AT1G09760.1	3702.AT1G09770.1	3702.AT1G09780.1	3702.AT1G11650.2	3702.AT1G16300.1	3702.AT1G16350.1	3702.AT1G16890.3	3702.AT1G18630.1	3702.AT1G20960.1	3702.AT1G21690.3	3702.AT1G25350.2	3702.AT1G26110.1	3702.AT1G27450.3	3702.AT1G30680.1	3702.AT1G31070.2	3702.AT1G31817.1	3702.AT1G32440.1	3702.AT1G32490.1	3702.AT1G43190.1	3702.AT1G44900.1	3702.AT1G44910.1	3702.AT1G48410.2	3702.AT1G48520.1	3702.AT1G48920.1	3702.AT1G49600.1	3702.AT1G50200.1	3702.AT1G51510.1	3702.AT1G53500.1	3702.AT1G55150.1	3702.AT1G59760.1	3702.AT1G59870.1	3702.AT1G60810.1	3702.AT1G63000.1	3702.AT1G63020.2	3702.AT1G63160.1	3702.AT1G63210.1	3702.AT1G65440.1	3702.AT1G66260.2	3702.AT1G66530.1	3702.AT1G67120.1	3702.AT1G68760.1	3702.AT1G70660.1	3702.AT1G70980.1
GO Process GO:0044249 Cellular biosynthetic process 264 2275 0.37 2.97e-33 3702.AT1G01090.1	3702.AT1G01290.1	3702.AT1G02500.1	3702.AT1G04270.1	3702.AT1G04710.1	3702.AT1G05010.1	3702.AT1G07890.8	3702.AT1G08130.1	3702.AT1G09620.1	3702.AT1G09640.1	3702.AT1G10840.1	3702.AT1G12920.1	3702.AT1G13950.1	3702.AT1G16350.1	3702.AT1G18500.1	3702.AT1G20510.1	3702.AT1G21690.3	3702.AT1G25350.2	3702.AT1G26630.1	3702.AT1G27450.3	3702.AT1G30230.2	3702.AT1G30680.1	3702.AT1G31070.2	3702.AT1G31817.1	3702.AT1G31860.1	3702.AT1G32200.1	3702.AT1G36730.1	3702.AT1G37130.1	3702.AT1G44900.1	3702.AT1G48520.1	3702.AT1G48850.1	3702.AT1G49820.1	3702.AT1G50200.1	3702.AT1G51590.1	3702.AT1G51630.1	3702.AT1G52340.1	3702.AT1G52760.1	3702.AT1G53500.1	3702.AT1G54270.1	3702.AT1G57720.1	3702.AT1G58080.1	3702.AT1G60810.1	3702.AT1G62380.1	3702.AT1G63000.1	3702.AT1G63020.2	3702.AT1G63050.1	3702.AT1G63160.1	3702.AT1G63210.1	3702.AT1G65440.1	3702.AT1G66530.1
GO Process GO:0070727 Cellular macromolecule localization 119 565 0.63 3.12e-33 3702.AT1G01910.4	3702.AT1G02130.1	3702.AT1G02690.2	3702.AT1G06210.1	3702.AT1G06400.1	3702.AT1G09270.1	3702.AT1G15130.1	3702.AT1G21380.1	3702.AT1G31730.1	3702.AT1G47550.2	3702.AT1G48160.1	3702.AT1G48900.1	3702.AT1G52360.2	3702.AT1G55900.1	3702.AT1G59870.1	3702.AT1G60070.2	3702.AT1G60780.1	3702.AT1G62020.1	3702.AT1G67120.1	3702.AT1G70490.3	3702.AT1G72750.1	3702.AT1G77140.1	3702.AT1G79280.2	3702.AT1G79990.1	3702.AT2G01970.1	3702.AT2G04030.1	3702.AT2G14720.2	3702.AT2G14740.1	3702.AT2G16640.1	3702.AT2G16950.1	3702.AT2G17380.1	3702.AT2G17390.1	3702.AT2G17980.1	3702.AT2G19760.1	3702.AT2G20890.1	3702.AT2G21390.1	3702.AT2G21660.1	3702.AT2G22125.1	3702.AT2G31660.1	3702.AT2G35795.1	3702.AT2G36070.1	3702.AT2G37410.1	3702.AT2G39960.1	3702.AT2G44610.1	3702.AT2G45000.1	3702.AT2G45140.1	3702.AT2G45790.1	3702.AT2G46520.1	3702.AT2G47170.1	3702.AT3G03250.1
GO Process GO:0034613 Cellular protein localization 115 534 0.64 7.63e-33 3702.AT1G01910.4	3702.AT1G02130.1	3702.AT1G02690.2	3702.AT1G06210.1	3702.AT1G06400.1	3702.AT1G09270.1	3702.AT1G15130.1	3702.AT1G21380.1	3702.AT1G31730.1	3702.AT1G47550.2	3702.AT1G48160.1	3702.AT1G48900.1	3702.AT1G52360.2	3702.AT1G55900.1	3702.AT1G60070.2	3702.AT1G60780.1	3702.AT1G62020.1	3702.AT1G67120.1	3702.AT1G70490.3	3702.AT1G72750.1	3702.AT1G77140.1	3702.AT1G79280.2	3702.AT1G79990.1	3702.AT2G01970.1	3702.AT2G04030.1	3702.AT2G14720.2	3702.AT2G14740.1	3702.AT2G16640.1	3702.AT2G16950.1	3702.AT2G17380.1	3702.AT2G17390.1	3702.AT2G17980.1	3702.AT2G19760.1	3702.AT2G20890.1	3702.AT2G21390.1	3702.AT2G21660.1	3702.AT2G22125.1	3702.AT2G31660.1	3702.AT2G35795.1	3702.AT2G36070.1	3702.AT2G37410.1	3702.AT2G39960.1	3702.AT2G44610.1	3702.AT2G45000.1	3702.AT2G45140.1	3702.AT2G45790.1	3702.AT2G46520.1	3702.AT2G47170.1	3702.AT3G06720.1	3702.AT3G07100.1
GO Process GO:0071705 Nitrogen compound transport 158 973 0.51 8.12e-33 3702.AT1G01910.4	3702.AT1G01960.1	3702.AT1G02130.1	3702.AT1G02140.1	3702.AT1G02690.2	3702.AT1G06210.1	3702.AT1G06400.1	3702.AT1G07140.1	3702.AT1G09270.1	3702.AT1G11890.1	3702.AT1G15130.1	3702.AT1G20110.1	3702.AT1G21380.1	3702.AT1G30630.1	3702.AT1G31730.1	3702.AT1G32050.1	3702.AT1G48160.1	3702.AT1G48900.1	3702.AT1G50500.2	3702.AT1G51510.1	3702.AT1G52360.2	3702.AT1G55900.1	3702.AT1G60070.2	3702.AT1G60780.1	3702.AT1G61250.1	3702.AT1G62020.1	3702.AT1G66260.2	3702.AT1G67120.1	3702.AT1G70490.3	3702.AT1G72750.1	3702.AT1G73030.1	3702.AT1G77140.1	3702.AT1G79280.2	3702.AT1G79990.1	3702.AT2G04030.1	3702.AT2G13540.1	3702.AT2G14720.2	3702.AT2G14740.1	3702.AT2G16640.1	3702.AT2G16950.1	3702.AT2G17380.1	3702.AT2G17390.1	3702.AT2G17980.1	3702.AT2G20890.1	3702.AT2G21390.1	3702.AT2G21660.1	3702.AT2G27600.1	3702.AT2G30050.1	3702.AT2G30060.1	3702.AT2G31660.1
GO Process GO:0010467 Gene expression 181 1235 0.47 8.15e-33 3702.AT1G02140.1	3702.AT1G02840.1	3702.AT1G04270.1	3702.AT1G06220.2	3702.AT1G08370.1	3702.AT1G09620.1	3702.AT1G09640.1	3702.AT1G09760.1	3702.AT1G09770.1	3702.AT1G10840.1	3702.AT1G11650.2	3702.AT1G12920.1	3702.AT1G13950.1	3702.AT1G18630.1	3702.AT1G20960.1	3702.AT1G25350.2	3702.AT1G26110.1	3702.AT1G26630.1	3702.AT1G30230.2	3702.AT1G31817.1	3702.AT1G32490.1	3702.AT1G36730.1	3702.AT1G43190.1	3702.AT1G44910.1	3702.AT1G48520.1	3702.AT1G48920.1	3702.AT1G49600.1	3702.AT1G50200.1	3702.AT1G51390.1	3702.AT1G51510.1	3702.AT1G54270.1	3702.AT1G55150.1	3702.AT1G57720.1	3702.AT1G59760.1	3702.AT1G63020.2	3702.AT1G63210.1	3702.AT1G65440.1	3702.AT1G66260.2	3702.AT1G66530.1	3702.AT1G67120.1	3702.AT1G69410.1	3702.AT1G70980.1	3702.AT1G71770.1	3702.AT1G72550.1	3702.AT1G72730.1	3702.AT1G74230.1	3702.AT1G79280.2	3702.AT1G79340.1	3702.AT1G79730.1	3702.AT1G80070.1
GO Process GO:1901564 Organonitrogen compound metabolic process 383 4053 0.28 2.49e-32 3702.AT1G01090.1	3702.AT1G01290.1	3702.AT1G01300.1	3702.AT1G01940.1	3702.AT1G02305.1	3702.AT1G02920.1	3702.AT1G02930.1	3702.AT1G04270.1	3702.AT1G04810.1	3702.AT1G04870.2	3702.AT1G06900.1	3702.AT1G08420.1	3702.AT1G09300.1	3702.AT1G09620.1	3702.AT1G09640.1	3702.AT1G09780.1	3702.AT1G10840.1	3702.AT1G10940.2	3702.AT1G11860.3	3702.AT1G12920.1	3702.AT1G13320.3	3702.AT1G13950.1	3702.AT1G15130.1	3702.AT1G16300.1	3702.AT1G16350.1	3702.AT1G16890.3	3702.AT1G18450.1	3702.AT1G18500.1	3702.AT1G20200.1	3702.AT1G22920.1	3702.AT1G25350.2	3702.AT1G25490.1	3702.AT1G26630.1	3702.AT1G27450.3	3702.AT1G28120.1	3702.AT1G29150.1	3702.AT1G30230.2	3702.AT1G31817.1	3702.AT1G31860.1	3702.AT1G32440.1	3702.AT1G35670.1	3702.AT1G36730.1	3702.AT1G43710.1	3702.AT1G44790.1	3702.AT1G45000.1	3702.AT1G47128.1	3702.AT1G48520.1	3702.AT1G48850.1	3702.AT1G49340.2	3702.AT1G49820.1
GO Process GO:0016192 Vesicle-mediated transport 94 361 0.72 4.34e-32 3702.AT1G01960.1	3702.AT1G02130.1	3702.AT1G10290.1	3702.AT1G11890.1	3702.AT1G15130.1	3702.AT1G20110.1	3702.AT1G30630.1	3702.AT1G31730.1	3702.AT1G47550.2	3702.AT1G50500.2	3702.AT1G52360.2	3702.AT1G59610.1	3702.AT1G60070.2	3702.AT1G60780.1	3702.AT1G62020.1	3702.AT1G67930.1	3702.AT1G70490.3	3702.AT1G73030.1	3702.AT1G76850.1	3702.AT1G77140.1	3702.AT1G79990.1	3702.AT2G14720.2	3702.AT2G14740.1	3702.AT2G17380.1	3702.AT2G17980.1	3702.AT2G20990.3	3702.AT2G21390.1	3702.AT2G27600.1	3702.AT2G30050.1	3702.AT2G33120.2	3702.AT2G37550.1	3702.AT2G43160.1	3702.AT2G44610.1	3702.AT2G45200.2	3702.AT2G47170.1	3702.AT3G01340.1	3702.AT3G07100.1	3702.AT3G08530.1	3702.AT3G09800.1	3702.AT3G10380.1	3702.AT3G11130.1	3702.AT3G15980.5	3702.AT3G22845.1	3702.AT3G24350.2	3702.AT3G27530.1	3702.AT3G43300.1	3702.AT3G44340.1	3702.AT3G46060.2	3702.AT3G51310.1	3702.AT3G56190.1
GO Process GO:1901576 Organic substance biosynthetic process 267 2363 0.36 5.01e-32 3702.AT1G01090.1	3702.AT1G01290.1	3702.AT1G02500.1	3702.AT1G04270.1	3702.AT1G04710.1	3702.AT1G05010.1	3702.AT1G07890.8	3702.AT1G08130.1	3702.AT1G09620.1	3702.AT1G09640.1	3702.AT1G10840.1	3702.AT1G12920.1	3702.AT1G13950.1	3702.AT1G16350.1	3702.AT1G18500.1	3702.AT1G20330.1	3702.AT1G20510.1	3702.AT1G21690.3	3702.AT1G25350.2	3702.AT1G26630.1	3702.AT1G27450.3	3702.AT1G30230.2	3702.AT1G30680.1	3702.AT1G31070.2	3702.AT1G31817.1	3702.AT1G31860.1	3702.AT1G32200.1	3702.AT1G36730.1	3702.AT1G44900.1	3702.AT1G48520.1	3702.AT1G48850.1	3702.AT1G49820.1	3702.AT1G50200.1	3702.AT1G51590.1	3702.AT1G51630.1	3702.AT1G52340.1	3702.AT1G52760.1	3702.AT1G53500.1	3702.AT1G54270.1	3702.AT1G57720.1	3702.AT1G58080.1	3702.AT1G60810.1	3702.AT1G62380.1	3702.AT1G63000.1	3702.AT1G63020.2	3702.AT1G63050.1	3702.AT1G63160.1	3702.AT1G63210.1	3702.AT1G65440.1	3702.AT1G66530.1
GO Process GO:0006886 Intracellular protein transport 105 457 0.66 5.33e-32 3702.AT1G01910.4	3702.AT1G02130.1	3702.AT1G02690.2	3702.AT1G06210.1	3702.AT1G06400.1	3702.AT1G09270.1	3702.AT1G15130.1	3702.AT1G21380.1	3702.AT1G31730.1	3702.AT1G48160.1	3702.AT1G48900.1	3702.AT1G52360.2	3702.AT1G55900.1	3702.AT1G60070.2	3702.AT1G60780.1	3702.AT1G62020.1	3702.AT1G67120.1	3702.AT1G70490.3	3702.AT1G72750.1	3702.AT1G77140.1	3702.AT1G79280.2	3702.AT1G79990.1	3702.AT2G04030.1	3702.AT2G14720.2	3702.AT2G14740.1	3702.AT2G16640.1	3702.AT2G16950.1	3702.AT2G17380.1	3702.AT2G17390.1	3702.AT2G17980.1	3702.AT2G20890.1	3702.AT2G21390.1	3702.AT2G21660.1	3702.AT2G31660.1	3702.AT2G35795.1	3702.AT2G36070.1	3702.AT2G37410.1	3702.AT2G39960.1	3702.AT2G44610.1	3702.AT2G45000.1	3702.AT2G45140.1	3702.AT2G45790.1	3702.AT2G46520.1	3702.AT2G47170.1	3702.AT3G06720.1	3702.AT3G07100.1	3702.AT3G07410.1	3702.AT3G08530.1	3702.AT3G09840.1	3702.AT3G10380.1
GO Process GO:0009058 Biosynthetic process 274 2480 0.35 1.66e-31 3702.AT1G01090.1	3702.AT1G01290.1	3702.AT1G02500.1	3702.AT1G04270.1	3702.AT1G04710.1	3702.AT1G05010.1	3702.AT1G07890.8	3702.AT1G08130.1	3702.AT1G09620.1	3702.AT1G09640.1	3702.AT1G10840.1	3702.AT1G12920.1	3702.AT1G13950.1	3702.AT1G16350.1	3702.AT1G18500.1	3702.AT1G20330.1	3702.AT1G20510.1	3702.AT1G21690.3	3702.AT1G25350.2	3702.AT1G26630.1	3702.AT1G27450.3	3702.AT1G30230.2	3702.AT1G30680.1	3702.AT1G31070.2	3702.AT1G31817.1	3702.AT1G31860.1	3702.AT1G32200.1	3702.AT1G36730.1	3702.AT1G37130.1	3702.AT1G44900.1	3702.AT1G48520.1	3702.AT1G48850.1	3702.AT1G49820.1	3702.AT1G50200.1	3702.AT1G51590.1	3702.AT1G51630.1	3702.AT1G52340.1	3702.AT1G52760.1	3702.AT1G53500.1	3702.AT1G54270.1	3702.AT1G57720.1	3702.AT1G58080.1	3702.AT1G60810.1	3702.AT1G62380.1	3702.AT1G63000.1	3702.AT1G63020.2	3702.AT1G63050.1	3702.AT1G63160.1	3702.AT1G63210.1	3702.AT1G65440.1
GO Process GO:0010038 Response to metal ion 94 374 0.7 4.08e-31 3702.AT1G02130.1	3702.AT1G02500.1	3702.AT1G02920.1	3702.AT1G02930.1	3702.AT1G07890.8	3702.AT1G09780.1	3702.AT1G11860.3	3702.AT1G21750.1	3702.AT1G26630.1	3702.AT1G29150.1	3702.AT1G30580.1	3702.AT1G49760.1	3702.AT1G50200.1	3702.AT1G52760.1	3702.AT1G54270.1	3702.AT1G56340.1	3702.AT1G57720.1	3702.AT1G60420.1	3702.AT1G62740.1	3702.AT1G64550.1	3702.AT1G65980.1	3702.AT1G68560.1	3702.AT1G70490.3	3702.AT1G74560.3	3702.AT1G75280.1	3702.AT1G75950.1	3702.AT1G77510.1	3702.AT1G78870.1	3702.AT2G19480.1	3702.AT2G21660.1	3702.AT2G22125.1	3702.AT2G23350.1	3702.AT2G29550.1	3702.AT2G30110.1	3702.AT2G33800.1	3702.AT2G37760.1	3702.AT2G45290.1	3702.AT2G46280.1	3702.AT2G47470.1	3702.AT3G02530.1	3702.AT3G06930.2	3702.AT3G09440.1	3702.AT3G09840.1	3702.AT3G11830.1	3702.AT3G12580.1	3702.AT3G12780.1	3702.AT3G16640.1	3702.AT3G18190.1	3702.AT3G22890.1	3702.AT3G22960.1
GO Process GO:0016043 Cellular component organization 257 2264 0.36 5.28e-31 3702.AT1G01820.1	3702.AT1G01910.4	3702.AT1G04270.1	3702.AT1G04870.2	3702.AT1G06760.1	3702.AT1G08880.1	3702.AT1G10200.1	3702.AT1G10290.1	3702.AT1G10840.1	3702.AT1G11890.1	3702.AT1G12270.1	3702.AT1G12920.1	3702.AT1G14830.1	3702.AT1G15130.1	3702.AT1G15220.2	3702.AT1G17710.1	3702.AT1G18450.1	3702.AT1G19520.1	3702.AT1G20110.1	3702.AT1G20693.1	3702.AT1G20960.1	3702.AT1G22920.1	3702.AT1G26110.1	3702.AT1G29150.1	3702.AT1G30680.1	3702.AT1G31817.1	3702.AT1G36730.1	3702.AT1G44900.1	3702.AT1G47750.1	3702.AT1G48160.1	3702.AT1G50500.2	3702.AT1G51390.1	3702.AT1G51630.1	3702.AT1G55250.1	3702.AT1G55900.1	3702.AT1G59610.1	3702.AT1G59870.1	3702.AT1G62740.1	3702.AT1G63000.1	3702.AT1G63210.1	3702.AT1G64090.2	3702.AT1G64520.1	3702.AT1G64760.2	3702.AT1G65260.1	3702.AT1G65440.1	3702.AT1G67120.1	3702.AT1G68060.1	3702.AT1G68560.1	3702.AT1G68790.1	3702.AT1G71440.1
GO Process GO:0043170 Macromolecule metabolic process 419 4720 0.25 1.94e-30 3702.AT1G01290.1	3702.AT1G01300.1	3702.AT1G01940.1	3702.AT1G02140.1	3702.AT1G02305.1	3702.AT1G02840.1	3702.AT1G04270.1	3702.AT1G04810.1	3702.AT1G04870.2	3702.AT1G06220.2	3702.AT1G06900.1	3702.AT1G08130.1	3702.AT1G08370.1	3702.AT1G08420.1	3702.AT1G09300.1	3702.AT1G09620.1	3702.AT1G09640.1	3702.AT1G09760.1	3702.AT1G09770.1	3702.AT1G10840.1	3702.AT1G10940.2	3702.AT1G11650.2	3702.AT1G12920.1	3702.AT1G13320.3	3702.AT1G13950.1	3702.AT1G15130.1	3702.AT1G16890.3	3702.AT1G18450.1	3702.AT1G18630.1	3702.AT1G20200.1	3702.AT1G20960.1	3702.AT1G21690.3	3702.AT1G22920.1	3702.AT1G25350.2	3702.AT1G25490.1	3702.AT1G26110.1	3702.AT1G26630.1	3702.AT1G28120.1	3702.AT1G29150.1	3702.AT1G30230.2	3702.AT1G30680.1	3702.AT1G31817.1	3702.AT1G32490.1	3702.AT1G35670.1	3702.AT1G36730.1	3702.AT1G43190.1	3702.AT1G44900.1	3702.AT1G44910.1	3702.AT1G45000.1	3702.AT1G47128.1
GO Process GO:0006457 Protein folding 60 141 0.93 2.07e-29 3702.AT1G01940.1	3702.AT1G08450.1	3702.AT1G09210.1	3702.AT1G21750.1	3702.AT1G24510.1	3702.AT1G35620.1	3702.AT1G52260.1	3702.AT1G56340.1	3702.AT1G71440.1	3702.AT1G77510.1	3702.AT2G04030.1	3702.AT2G15790.1	3702.AT2G16600.1	3702.AT2G21130.1	3702.AT2G22360.1	3702.AT2G25140.1	3702.AT2G29960.1	3702.AT2G36130.1	3702.AT2G38730.1	3702.AT2G38960.3	3702.AT3G02530.1	3702.AT3G03960.1	3702.AT3G07770.1	3702.AT3G09440.1	3702.AT3G11830.1	3702.AT3G12580.1	3702.AT3G16110.1	3702.AT3G17880.1	3702.AT3G18190.1	3702.AT3G20050.1	3702.AT3G25230.2	3702.AT3G44110.1	3702.AT3G56070.1	3702.AT3G60740.1	3702.AT3G62030.2	3702.AT3G62600.1	3702.AT4G22670.1	3702.AT4G24190.1	3702.AT4G24280.1	3702.AT4G34870.1	3702.AT4G38740.1	3702.AT5G02490.1	3702.AT5G02500.1	3702.AT5G13120.1	3702.AT5G15450.1	3702.AT5G20890.1	3702.AT5G22060.1	3702.AT5G26360.1	3702.AT5G28540.1	3702.AT5G42020.1
GO Process GO:0071702 Organic substance transport 167 1170 0.46 5.36e-29 3702.AT1G01910.4	3702.AT1G01960.1	3702.AT1G02130.1	3702.AT1G02140.1	3702.AT1G02690.2	3702.AT1G06210.1	3702.AT1G06400.1	3702.AT1G07140.1	3702.AT1G09270.1	3702.AT1G11260.1	3702.AT1G11890.1	3702.AT1G15130.1	3702.AT1G20110.1	3702.AT1G21380.1	3702.AT1G30630.1	3702.AT1G31730.1	3702.AT1G32050.1	3702.AT1G48160.1	3702.AT1G48900.1	3702.AT1G50500.2	3702.AT1G51510.1	3702.AT1G52360.2	3702.AT1G55900.1	3702.AT1G60070.2	3702.AT1G60780.1	3702.AT1G61250.1	3702.AT1G62020.1	3702.AT1G66260.2	3702.AT1G67120.1	3702.AT1G70490.3	3702.AT1G72750.1	3702.AT1G73030.1	3702.AT1G77140.1	3702.AT1G79280.2	3702.AT1G79990.1	3702.AT2G04030.1	3702.AT2G13540.1	3702.AT2G14720.2	3702.AT2G14740.1	3702.AT2G16640.1	3702.AT2G16950.1	3702.AT2G17380.1	3702.AT2G17390.1	3702.AT2G17980.1	3702.AT2G20890.1	3702.AT2G20990.3	3702.AT2G21390.1	3702.AT2G21660.1	3702.AT2G27600.1	3702.AT2G30050.1
GO Process GO:1901566 Organonitrogen compound biosynthetic process 161 1168 0.44 2.25e-26 3702.AT1G01090.1	3702.AT1G01290.1	3702.AT1G04270.1	3702.AT1G09620.1	3702.AT1G09640.1	3702.AT1G10840.1	3702.AT1G12920.1	3702.AT1G13950.1	3702.AT1G16350.1	3702.AT1G18500.1	3702.AT1G25350.2	3702.AT1G26630.1	3702.AT1G27450.3	3702.AT1G30230.2	3702.AT1G31817.1	3702.AT1G31860.1	3702.AT1G36730.1	3702.AT1G48520.1	3702.AT1G48850.1	3702.AT1G49820.1	3702.AT1G50200.1	3702.AT1G51590.1	3702.AT1G52340.1	3702.AT1G54270.1	3702.AT1G57720.1	3702.AT1G58080.1	3702.AT1G60810.1	3702.AT1G65440.1	3702.AT1G66530.1	3702.AT1G69410.1	3702.AT1G70980.1	3702.AT1G71770.1	3702.AT1G72550.1	3702.AT1G72730.1	3702.AT1G74040.1	3702.AT1G74260.1	3702.AT1G76400.1	3702.AT1G79470.1	3702.AT2G01350.1	3702.AT2G01720.1	3702.AT2G05830.1	3702.AT2G17340.1	3702.AT2G18110.1	3702.AT2G22450.1	3702.AT2G24050.1	3702.AT2G26670.1	3702.AT2G31810.1	3702.AT2G32260.1	3702.AT2G33800.1	3702.AT2G34590.1
GO Process GO:0006996 Organelle organization 182 1432 0.41 3.00e-26 3702.AT1G01820.1	3702.AT1G01910.4	3702.AT1G04270.1	3702.AT1G04870.2	3702.AT1G06760.1	3702.AT1G08880.1	3702.AT1G10200.1	3702.AT1G10290.1	3702.AT1G11890.1	3702.AT1G14830.1	3702.AT1G15130.1	3702.AT1G18450.1	3702.AT1G19520.1	3702.AT1G20110.1	3702.AT1G20693.1	3702.AT1G26110.1	3702.AT1G30680.1	3702.AT1G31817.1	3702.AT1G44900.1	3702.AT1G47750.1	3702.AT1G55250.1	3702.AT1G55900.1	3702.AT1G59610.1	3702.AT1G63210.1	3702.AT1G64090.2	3702.AT1G65260.1	3702.AT1G65440.1	3702.AT1G67120.1	3702.AT1G68060.1	3702.AT1G68790.1	3702.AT1G71440.1	3702.AT1G72750.1	3702.AT1G74560.3	3702.AT1G75780.1	3702.AT1G75950.1	3702.AT1G76540.1	3702.AT1G77540.1	3702.AT1G79730.1	3702.AT2G02470.1	3702.AT2G02760.1	3702.AT2G07050.1	3702.AT2G07690.1	3702.AT2G14120.3	3702.AT2G16440.1	3702.AT2G18790.1	3702.AT2G19480.1	3702.AT2G19760.1	3702.AT2G20490.1	3702.AT2G20890.1	3702.AT2G21150.1
GO Process GO:0044281 Small molecule metabolic process 186 1509 0.39 1.97e-25 3702.AT1G01090.1	3702.AT1G02500.1	3702.AT1G04710.1	3702.AT1G09620.1	3702.AT1G09780.1	3702.AT1G11860.3	3702.AT1G16300.1	3702.AT1G16350.1	3702.AT1G18500.1	3702.AT1G20510.1	3702.AT1G25350.2	3702.AT1G27450.3	3702.AT1G30680.1	3702.AT1G31070.2	3702.AT1G31860.1	3702.AT1G32440.1	3702.AT1G37130.1	3702.AT1G43710.1	3702.AT1G48520.1	3702.AT1G48850.1	3702.AT1G49820.1	3702.AT1G50200.1	3702.AT1G51630.1	3702.AT1G52340.1	3702.AT1G53500.1	3702.AT1G58080.1	3702.AT1G59870.1	3702.AT1G60810.1	3702.AT1G63000.1	3702.AT1G66530.1	3702.AT1G68760.1	3702.AT1G70580.2	3702.AT1G70980.1	3702.AT1G72550.1	3702.AT1G73250.1	3702.AT1G74040.1	3702.AT1G74260.1	3702.AT1G76680.2	3702.AT1G78570.1	3702.AT1G79230.1	3702.AT1G79470.1	3702.AT1G79530.1	3702.AT2G01350.1	3702.AT2G02500.1	3702.AT2G03690.1	3702.AT2G04350.1	3702.AT2G05830.1	3702.AT2G05990.2	3702.AT2G17340.1	3702.AT2G18790.1
GO Process GO:0044271 Cellular nitrogen compound biosynthetic process 148 1068 0.44 2.52e-24 3702.AT1G01090.1	3702.AT1G04270.1	3702.AT1G08130.1	3702.AT1G09620.1	3702.AT1G09640.1	3702.AT1G10840.1	3702.AT1G12920.1	3702.AT1G13950.1	3702.AT1G16350.1	3702.AT1G25350.2	3702.AT1G26630.1	3702.AT1G27450.3	3702.AT1G30230.2	3702.AT1G30680.1	3702.AT1G31070.2	3702.AT1G31817.1	3702.AT1G36730.1	3702.AT1G37130.1	3702.AT1G48520.1	3702.AT1G50200.1	3702.AT1G53500.1	3702.AT1G54270.1	3702.AT1G57720.1	3702.AT1G60810.1	3702.AT1G63000.1	3702.AT1G63020.2	3702.AT1G63210.1	3702.AT1G65440.1	3702.AT1G66530.1	3702.AT1G68760.1	3702.AT1G69410.1	3702.AT1G70980.1	3702.AT1G71770.1	3702.AT1G72550.1	3702.AT1G72730.1	3702.AT1G73250.1	3702.AT1G74260.1	3702.AT1G78570.1	3702.AT1G79470.1	3702.AT1G79730.1	3702.AT2G01350.1	3702.AT2G15430.1	3702.AT2G17340.1	3702.AT2G18110.1	3702.AT2G22450.1	3702.AT2G24050.1	3702.AT2G26670.1	3702.AT2G27860.1	3702.AT2G33800.1	3702.AT2G34590.1
GO Process GO:0044260 Cellular macromolecule metabolic process 332 3665 0.26 3.09e-24 3702.AT1G01290.1	3702.AT1G01940.1	3702.AT1G02140.1	3702.AT1G02305.1	3702.AT1G04270.1	3702.AT1G04810.1	3702.AT1G04870.2	3702.AT1G08130.1	3702.AT1G08370.1	3702.AT1G08420.1	3702.AT1G09620.1	3702.AT1G09640.1	3702.AT1G09770.1	3702.AT1G10840.1	3702.AT1G10940.2	3702.AT1G12920.1	3702.AT1G13320.3	3702.AT1G13950.1	3702.AT1G15130.1	3702.AT1G16890.3	3702.AT1G18450.1	3702.AT1G20200.1	3702.AT1G21690.3	3702.AT1G22920.1	3702.AT1G25350.2	3702.AT1G25490.1	3702.AT1G26110.1	3702.AT1G26630.1	3702.AT1G28120.1	3702.AT1G29150.1	3702.AT1G30230.2	3702.AT1G30680.1	3702.AT1G31817.1	3702.AT1G35670.1	3702.AT1G36730.1	3702.AT1G44900.1	3702.AT1G45000.1	3702.AT1G47128.1	3702.AT1G48520.1	3702.AT1G49340.2	3702.AT1G50200.1	3702.AT1G50370.1	3702.AT1G50670.1	3702.AT1G51510.1	3702.AT1G51590.1	3702.AT1G51630.1	3702.AT1G51660.1	3702.AT1G51690.3	3702.AT1G51710.1	3702.AT1G54270.1
GO Process GO:0043603 Cellular amide metabolic process 107 632 0.53 4.17e-23 3702.AT1G01090.1	3702.AT1G02920.1	3702.AT1G02930.1	3702.AT1G04270.1	3702.AT1G09620.1	3702.AT1G09640.1	3702.AT1G10840.1	3702.AT1G12920.1	3702.AT1G13950.1	3702.AT1G25350.2	3702.AT1G26630.1	3702.AT1G30230.2	3702.AT1G31817.1	3702.AT1G36730.1	3702.AT1G44790.1	3702.AT1G48520.1	3702.AT1G50200.1	3702.AT1G54270.1	3702.AT1G57720.1	3702.AT1G60810.1	3702.AT1G63770.5	3702.AT1G65440.1	3702.AT1G66530.1	3702.AT1G69410.1	3702.AT1G70980.1	3702.AT1G71770.1	3702.AT1G72550.1	3702.AT1G72730.1	3702.AT2G18110.1	3702.AT2G24050.1	3702.AT2G29440.1	3702.AT2G33800.1	3702.AT2G34590.1	3702.AT2G36160.1	3702.AT2G38700.1	3702.AT2G39960.1	3702.AT2G39990.1	3702.AT2G40290.1	3702.AT2G41790.1	3702.AT2G43030.1	3702.AT2G43360.1	3702.AT2G44160.1	3702.AT2G46280.1	3702.AT2G47110.1	3702.AT3G02660.1	3702.AT3G02760.1	3702.AT3G03600.1	3702.AT3G04600.1	3702.AT3G06650.1	3702.AT3G11250.1
GO Process GO:0090304 Nucleic acid metabolic process 170 1403 0.39 2.35e-22 3702.AT1G02140.1	3702.AT1G02840.1	3702.AT1G06220.2	3702.AT1G08130.1	3702.AT1G08370.1	3702.AT1G09620.1	3702.AT1G09760.1	3702.AT1G09770.1	3702.AT1G11650.2	3702.AT1G16890.3	3702.AT1G18630.1	3702.AT1G20960.1	3702.AT1G21690.3	3702.AT1G25350.2	3702.AT1G26110.1	3702.AT1G30680.1	3702.AT1G31817.1	3702.AT1G32490.1	3702.AT1G43190.1	3702.AT1G44900.1	3702.AT1G44910.1	3702.AT1G48410.2	3702.AT1G48520.1	3702.AT1G48920.1	3702.AT1G49600.1	3702.AT1G50200.1	3702.AT1G51510.1	3702.AT1G55150.1	3702.AT1G59760.1	3702.AT1G63020.2	3702.AT1G63160.1	3702.AT1G63210.1	3702.AT1G65440.1	3702.AT1G66260.2	3702.AT1G66530.1	3702.AT1G67120.1	3702.AT1G70660.1	3702.AT1G70980.1	3702.AT1G71260.1	3702.AT1G71770.1	3702.AT1G72550.1	3702.AT1G74230.1	3702.AT1G74560.3	3702.AT1G77470.1	3702.AT1G78870.1	3702.AT1G79650.4	3702.AT1G79730.1	3702.AT1G80070.1	3702.AT2G02760.1	3702.AT2G06990.1
GO Process GO:0048193 Golgi vesicle transport 49 129 0.88 3.24e-22 3702.AT1G02130.1	3702.AT1G10290.1	3702.AT1G11890.1	3702.AT1G30630.1	3702.AT1G47550.2	3702.AT1G50500.2	3702.AT1G52360.2	3702.AT1G60070.2	3702.AT1G62020.1	3702.AT1G67930.1	3702.AT1G76850.1	3702.AT1G79990.1	3702.AT2G14720.2	3702.AT2G14740.1	3702.AT2G17980.1	3702.AT2G21390.1	3702.AT2G30050.1	3702.AT2G44610.1	3702.AT2G45200.2	3702.AT3G01340.1	3702.AT3G07100.1	3702.AT3G09800.1	3702.AT3G10380.1	3702.AT3G15980.5	3702.AT3G22845.1	3702.AT3G24350.2	3702.AT3G27530.1	3702.AT3G44340.1	3702.AT3G60860.1	3702.AT3G63460.1	3702.AT4G02080.1	3702.AT4G04910.1	3702.AT4G08520.1	3702.AT4G17890.1	3702.AT4G24550.2	3702.AT4G24840.1	3702.AT4G31480.2	3702.AT4G31490.1	3702.AT4G32640.2	3702.AT4G34450.1	3702.AT5G05010.1	3702.AT5G06140.1	3702.AT5G09810.1	3702.AT5G12370.2	3702.AT5G16300.1	3702.AT5G46750.1	3702.AT5G49830.2	3702.AT5G51430.1	3702.AT5G54440.1 RA-5	ADL6
GO Process GO:0043604 Amide biosynthetic process 92 511 0.56 2.32e-21 3702.AT1G01090.1	3702.AT1G04270.1	3702.AT1G09620.1	3702.AT1G09640.1	3702.AT1G10840.1	3702.AT1G12920.1	3702.AT1G13950.1	3702.AT1G25350.2	3702.AT1G26630.1	3702.AT1G30230.2	3702.AT1G31817.1	3702.AT1G36730.1	3702.AT1G48520.1	3702.AT1G50200.1	3702.AT1G54270.1	3702.AT1G57720.1	3702.AT1G60810.1	3702.AT1G65440.1	3702.AT1G66530.1	3702.AT1G69410.1	3702.AT1G70980.1	3702.AT1G71770.1	3702.AT1G72550.1	3702.AT1G72730.1	3702.AT2G18110.1	3702.AT2G24050.1	3702.AT2G33800.1	3702.AT2G34590.1	3702.AT2G36160.1	3702.AT2G39990.1	3702.AT2G40290.1	3702.AT2G43030.1	3702.AT2G43360.1	3702.AT2G46280.1	3702.AT2G47110.1	3702.AT3G02660.1	3702.AT3G02760.1	3702.AT3G03600.1	3702.AT3G04600.1	3702.AT3G06650.1	3702.AT3G11250.1	3702.AT3G11710.1	3702.AT3G13490.1	3702.AT3G13920.2	3702.AT3G17465.1	3702.AT3G48110.1	3702.AT3G53890.1	3702.AT3G56150.2	3702.AT3G57290.1	3702.AT3G58140.1
GO Process GO:0051179 Localization 237 2370 0.3 2.41e-21 3702.AT1G01910.4	3702.AT1G01960.1	3702.AT1G02130.1	3702.AT1G02140.1	3702.AT1G02690.2	3702.AT1G06210.1	3702.AT1G06400.1	3702.AT1G07140.1	3702.AT1G07670.1	3702.AT1G09270.1	3702.AT1G10290.1	3702.AT1G11260.1	3702.AT1G11890.1	3702.AT1G15130.1	3702.AT1G20110.1	3702.AT1G21380.1	3702.AT1G22530.1	3702.AT1G25490.1	3702.AT1G30630.1	3702.AT1G30690.2	3702.AT1G31730.1	3702.AT1G32050.1	3702.AT1G43700.1	3702.AT1G47550.2	3702.AT1G48160.1	3702.AT1G48900.1	3702.AT1G50500.2	3702.AT1G51510.1	3702.AT1G52360.2	3702.AT1G54990.1	3702.AT1G55900.1	3702.AT1G57610.1	3702.AT1G59610.1	3702.AT1G59870.1	3702.AT1G60070.2	3702.AT1G60780.1	3702.AT1G61250.1	3702.AT1G62020.1	3702.AT1G66260.2	3702.AT1G67120.1	3702.AT1G67930.1	3702.AT1G70490.3	3702.AT1G72750.1	3702.AT1G73030.1	3702.AT1G76850.1	3702.AT1G77140.1	3702.AT1G78570.1	3702.AT1G79280.2	3702.AT1G79990.1	3702.AT2G01970.1
GO Process GO:0010035 Response to inorganic substance 117 801 0.47 1.25e-20 3702.AT1G02130.1	3702.AT1G02500.1	3702.AT1G02920.1	3702.AT1G02930.1	3702.AT1G07890.8	3702.AT1G09780.1	3702.AT1G11650.2	3702.AT1G11860.3	3702.AT1G21750.1	3702.AT1G26630.1	3702.AT1G29150.1	3702.AT1G30580.1	3702.AT1G49760.1	3702.AT1G50200.1	3702.AT1G52340.1	3702.AT1G52760.1	3702.AT1G54270.1	3702.AT1G56340.1	3702.AT1G57720.1	3702.AT1G59870.1	3702.AT1G60420.1	3702.AT1G62380.1	3702.AT1G62740.1	3702.AT1G64550.1	3702.AT1G65980.1	3702.AT1G68560.1	3702.AT1G70490.3	3702.AT1G74560.3	3702.AT1G75280.1	3702.AT1G75950.1	3702.AT1G77510.1	3702.AT1G78850.1	3702.AT1G78870.1	3702.AT2G04030.1	3702.AT2G17840.1	3702.AT2G18960.1	3702.AT2G19480.1	3702.AT2G21660.1	3702.AT2G22125.1	3702.AT2G23350.1	3702.AT2G29550.1	3702.AT2G30110.1	3702.AT2G33800.1	3702.AT2G37760.1	3702.AT2G38760.1	3702.AT2G39550.1	3702.AT2G39770.1	3702.AT2G41430.4	3702.AT2G45290.1	3702.AT2G46280.1
GO Process GO:0006518 Peptide metabolic process 90 510 0.55 2.21e-20 3702.AT1G02920.1	3702.AT1G02930.1	3702.AT1G04270.1	3702.AT1G09620.1	3702.AT1G09640.1	3702.AT1G10840.1	3702.AT1G12920.1	3702.AT1G13950.1	3702.AT1G25350.2	3702.AT1G26630.1	3702.AT1G30230.2	3702.AT1G31817.1	3702.AT1G36730.1	3702.AT1G44790.1	3702.AT1G48520.1	3702.AT1G50200.1	3702.AT1G54270.1	3702.AT1G57720.1	3702.AT1G63770.5	3702.AT1G65440.1	3702.AT1G66530.1	3702.AT1G69410.1	3702.AT1G70980.1	3702.AT1G71770.1	3702.AT1G72550.1	3702.AT1G72730.1	3702.AT2G18110.1	3702.AT2G24050.1	3702.AT2G29440.1	3702.AT2G33800.1	3702.AT2G36160.1	3702.AT2G39960.1	3702.AT2G39990.1	3702.AT2G40290.1	3702.AT2G41790.1	3702.AT2G43030.1	3702.AT2G46280.1	3702.AT2G47110.1	3702.AT3G02660.1	3702.AT3G02760.1	3702.AT3G03600.1	3702.AT3G04600.1	3702.AT3G11250.1	3702.AT3G11710.1	3702.AT3G13490.1	3702.AT3G13920.2	3702.AT3G17465.1	3702.AT3G24170.1	3702.AT3G48110.1	3702.AT3G53890.1
GO Process GO:0051234 Establishment of localization 225 2261 0.3 6.66e-20 3702.AT1G01910.4	3702.AT1G01960.1	3702.AT1G02130.1	3702.AT1G02140.1	3702.AT1G02690.2	3702.AT1G06210.1	3702.AT1G06400.1	3702.AT1G07140.1	3702.AT1G07670.1	3702.AT1G09270.1	3702.AT1G10290.1	3702.AT1G11260.1	3702.AT1G11890.1	3702.AT1G15130.1	3702.AT1G20110.1	3702.AT1G21380.1	3702.AT1G22530.1	3702.AT1G25490.1	3702.AT1G30630.1	3702.AT1G30690.2	3702.AT1G31730.1	3702.AT1G32050.1	3702.AT1G43700.1	3702.AT1G47550.2	3702.AT1G48160.1	3702.AT1G48900.1	3702.AT1G50500.2	3702.AT1G51510.1	3702.AT1G52360.2	3702.AT1G54990.1	3702.AT1G55900.1	3702.AT1G57610.1	3702.AT1G59610.1	3702.AT1G59870.1	3702.AT1G60070.2	3702.AT1G60780.1	3702.AT1G61250.1	3702.AT1G62020.1	3702.AT1G66260.2	3702.AT1G67120.1	3702.AT1G67930.1	3702.AT1G70490.3	3702.AT1G72750.1	3702.AT1G73030.1	3702.AT1G76850.1	3702.AT1G77140.1	3702.AT1G78570.1	3702.AT1G79280.2	3702.AT1G79990.1	3702.AT2G04030.1
GO Process GO:0044085 Cellular component biogenesis 134 1028 0.42 8.23e-20 3702.AT1G04270.1	3702.AT1G06400.1	3702.AT1G06760.1	3702.AT1G10200.1	3702.AT1G10840.1	3702.AT1G12270.1	3702.AT1G15220.2	3702.AT1G17710.1	3702.AT1G20110.1	3702.AT1G20960.1	3702.AT1G22920.1	3702.AT1G26110.1	3702.AT1G29150.1	3702.AT1G31817.1	3702.AT1G36730.1	3702.AT1G44900.1	3702.AT1G48160.1	3702.AT1G48920.1	3702.AT1G51390.1	3702.AT1G51630.1	3702.AT1G55150.1	3702.AT1G59760.1	3702.AT1G62740.1	3702.AT1G64520.1	3702.AT1G66260.2	3702.AT1G67120.1	3702.AT1G68060.1	3702.AT1G71440.1	3702.AT1G73010.1	3702.AT1G74560.3	3702.AT1G80070.1	3702.AT2G02560.1	3702.AT2G06850.1	3702.AT2G06990.1	3702.AT2G07690.1	3702.AT2G16440.1	3702.AT2G16950.1	3702.AT2G17510.2	3702.AT2G19480.1	3702.AT2G20490.1	3702.AT2G20890.1	3702.AT2G22125.1	3702.AT2G28520.1	3702.AT2G30620.1	3702.AT2G31660.1	3702.AT2G33340.1	3702.AT2G33800.1	3702.AT2G35630.1	3702.AT2G36160.1	3702.AT2G39990.1
GO Process GO:0006810 Transport 222 2223 0.3 8.56e-20 3702.AT1G01910.4	3702.AT1G01960.1	3702.AT1G02130.1	3702.AT1G02140.1	3702.AT1G02690.2	3702.AT1G06210.1	3702.AT1G06400.1	3702.AT1G07140.1	3702.AT1G07670.1	3702.AT1G09270.1	3702.AT1G10290.1	3702.AT1G11260.1	3702.AT1G11890.1	3702.AT1G15130.1	3702.AT1G20110.1	3702.AT1G21380.1	3702.AT1G22530.1	3702.AT1G25490.1	3702.AT1G30630.1	3702.AT1G30690.2	3702.AT1G31730.1	3702.AT1G32050.1	3702.AT1G43700.1	3702.AT1G47550.2	3702.AT1G48160.1	3702.AT1G48900.1	3702.AT1G50500.2	3702.AT1G51510.1	3702.AT1G52360.2	3702.AT1G54990.1	3702.AT1G55900.1	3702.AT1G57610.1	3702.AT1G59610.1	3702.AT1G59870.1	3702.AT1G60070.2	3702.AT1G60780.1	3702.AT1G61250.1	3702.AT1G62020.1	3702.AT1G66260.2	3702.AT1G67120.1	3702.AT1G67930.1	3702.AT1G70490.3	3702.AT1G72750.1	3702.AT1G73030.1	3702.AT1G76850.1	3702.AT1G77140.1	3702.AT1G78570.1	3702.AT1G79280.2	3702.AT1G79990.1	3702.AT2G04030.1
GO Process GO:0019752 Carboxylic acid metabolic process 122 896 0.44 2.54e-19 3702.AT1G01090.1	3702.AT1G04710.1	3702.AT1G09620.1	3702.AT1G09780.1	3702.AT1G11860.3	3702.AT1G16300.1	3702.AT1G18500.1	3702.AT1G20510.1	3702.AT1G25350.2	3702.AT1G31860.1	3702.AT1G32440.1	3702.AT1G43710.1	3702.AT1G48520.1	3702.AT1G48850.1	3702.AT1G49820.1	3702.AT1G50200.1	3702.AT1G52340.1	3702.AT1G58080.1	3702.AT1G66530.1	3702.AT1G70580.2	3702.AT1G70980.1	3702.AT1G72550.1	3702.AT1G74040.1	3702.AT1G74260.1	3702.AT1G76680.2	3702.AT1G79230.1	3702.AT1G79530.1	3702.AT2G01350.1	3702.AT2G02500.1	3702.AT2G04350.1	3702.AT2G05830.1	3702.AT2G05990.2	3702.AT2G18790.1	3702.AT2G19860.1	3702.AT2G20860.1	3702.AT2G22480.1	3702.AT2G31810.1	3702.AT2G34590.1	3702.AT2G39770.1	3702.AT2G43360.1	3702.AT2G43400.1	3702.AT2G44160.1	3702.AT2G45300.1	3702.AT2G45790.1	3702.AT3G02360.2	3702.AT3G02660.1	3702.AT3G02760.1	3702.AT3G04600.1	3702.AT3G05970.1	3702.AT3G06650.1
GO Process GO:0019538 Protein metabolic process 277 3075 0.26 2.65e-19 3702.AT1G01290.1	3702.AT1G01300.1	3702.AT1G01940.1	3702.AT1G02305.1	3702.AT1G04270.1	3702.AT1G04810.1	3702.AT1G04870.2	3702.AT1G06900.1	3702.AT1G08420.1	3702.AT1G09300.1	3702.AT1G09620.1	3702.AT1G09640.1	3702.AT1G10840.1	3702.AT1G10940.2	3702.AT1G12920.1	3702.AT1G13320.3	3702.AT1G13950.1	3702.AT1G15130.1	3702.AT1G16890.3	3702.AT1G18450.1	3702.AT1G20200.1	3702.AT1G22920.1	3702.AT1G25350.2	3702.AT1G25490.1	3702.AT1G26630.1	3702.AT1G28120.1	3702.AT1G29150.1	3702.AT1G30230.2	3702.AT1G31817.1	3702.AT1G35670.1	3702.AT1G36730.1	3702.AT1G45000.1	3702.AT1G47128.1	3702.AT1G48520.1	3702.AT1G49340.2	3702.AT1G50200.1	3702.AT1G50370.1	3702.AT1G50670.1	3702.AT1G51390.1	3702.AT1G51590.1	3702.AT1G51660.1	3702.AT1G51690.3	3702.AT1G51710.1	3702.AT1G53750.1	3702.AT1G54270.1	3702.AT1G55250.1	3702.AT1G55900.1	3702.AT1G57720.1	3702.AT1G59830.1	3702.AT1G61150.1
GO Process GO:0043933 Protein-containing complex subunit organization 84 476 0.55 5.17e-19 3702.AT1G04270.1	3702.AT1G06760.1	3702.AT1G10840.1	3702.AT1G12270.1	3702.AT1G12920.1	3702.AT1G15220.2	3702.AT1G17710.1	3702.AT1G20960.1	3702.AT1G22920.1	3702.AT1G29150.1	3702.AT1G31817.1	3702.AT1G36730.1	3702.AT1G44900.1	3702.AT1G48160.1	3702.AT1G62740.1	3702.AT1G63210.1	3702.AT1G64520.1	3702.AT1G65440.1	3702.AT1G67120.1	3702.AT1G71440.1	3702.AT1G73010.1	3702.AT1G74560.3	3702.AT1G80070.1	3702.AT2G02560.1	3702.AT2G07690.1	3702.AT2G16440.1	3702.AT2G16950.1	3702.AT2G19480.1	3702.AT2G20890.1	3702.AT2G28520.1	3702.AT2G30620.1	3702.AT2G31660.1	3702.AT2G33340.1	3702.AT2G35630.1	3702.AT2G36160.1	3702.AT2G39990.1	3702.AT2G46280.1	3702.AT3G09840.1	3702.AT3G11250.1	3702.AT3G17880.1	3702.AT3G22590.1	3702.AT3G46000.1	3702.AT3G46030.1	3702.AT3G53230.1	3702.AT3G56150.2	3702.AT3G56190.1	3702.AT3G57290.1	3702.AT3G60740.1	3702.AT3G61650.1	3702.AT3G62790.1
GO Process GO:0043043 Peptide biosynthetic process 80 441 0.56 1.03e-18 3702.AT1G04270.1	3702.AT1G09620.1	3702.AT1G09640.1	3702.AT1G10840.1	3702.AT1G12920.1	3702.AT1G13950.1	3702.AT1G25350.2	3702.AT1G26630.1	3702.AT1G30230.2	3702.AT1G31817.1	3702.AT1G36730.1	3702.AT1G48520.1	3702.AT1G50200.1	3702.AT1G54270.1	3702.AT1G57720.1	3702.AT1G65440.1	3702.AT1G66530.1	3702.AT1G69410.1	3702.AT1G70980.1	3702.AT1G71770.1	3702.AT1G72550.1	3702.AT1G72730.1	3702.AT2G18110.1	3702.AT2G24050.1	3702.AT2G33800.1	3702.AT2G36160.1	3702.AT2G39990.1	3702.AT2G40290.1	3702.AT2G43030.1	3702.AT2G46280.1	3702.AT2G47110.1	3702.AT3G02660.1	3702.AT3G02760.1	3702.AT3G03600.1	3702.AT3G04600.1	3702.AT3G11250.1	3702.AT3G11710.1	3702.AT3G13490.1	3702.AT3G13920.2	3702.AT3G17465.1	3702.AT3G48110.1	3702.AT3G53890.1	3702.AT3G56150.2	3702.AT3G57290.1	3702.AT3G58140.1	3702.AT3G60240.4	3702.AT3G62120.1	3702.AT3G63140.1	3702.AT3G63490.1	3702.AT4G10320.1
GO Process GO:0010608 Posttranscriptional regulation of gene expression 62 270 0.66 1.08e-18 3702.AT1G02140.1	3702.AT1G09640.1	3702.AT1G10840.1	3702.AT1G12920.1	3702.AT1G13950.1	3702.AT1G26110.1	3702.AT1G26630.1	3702.AT1G30230.2	3702.AT1G32490.1	3702.AT1G36730.1	3702.AT1G43190.1	3702.AT1G48410.2	3702.AT1G49760.1	3702.AT1G51510.1	3702.AT1G54270.1	3702.AT1G57720.1	3702.AT1G63020.2	3702.AT1G64790.2	3702.AT1G65440.1	3702.AT1G69410.1	3702.AT1G71770.1	3702.AT1G72730.1	3702.AT2G13540.1	3702.AT2G16950.1	3702.AT2G18110.1	3702.AT2G21150.1	3702.AT2G23350.1	3702.AT2G24050.1	3702.AT2G27100.1	3702.AT2G29190.2	3702.AT2G31660.1	3702.AT2G39990.1	3702.AT2G40290.1	3702.AT2G46280.1	3702.AT3G13460.1	3702.AT3G13920.2	3702.AT3G19760.1	3702.AT3G53460.4	3702.AT3G56150.2	3702.AT3G57290.1	3702.AT3G60240.4	3702.AT3G61240.1	3702.AT3G63140.1	3702.AT4G02840.2	3702.AT4G11420.1	3702.AT4G20360.1	3702.AT4G21710.1	3702.AT4G24770.1	3702.AT4G24800.3	3702.AT4G31790.1
GO Process GO:0006082 Organic acid metabolic process 131 1028 0.41 1.24e-18 3702.AT1G01090.1	3702.AT1G04710.1	3702.AT1G09620.1	3702.AT1G09780.1	3702.AT1G11860.3	3702.AT1G16300.1	3702.AT1G18500.1	3702.AT1G20510.1	3702.AT1G25350.2	3702.AT1G31860.1	3702.AT1G32440.1	3702.AT1G37130.1	3702.AT1G43710.1	3702.AT1G48520.1	3702.AT1G48850.1	3702.AT1G49820.1	3702.AT1G50200.1	3702.AT1G52340.1	3702.AT1G58080.1	3702.AT1G59870.1	3702.AT1G66530.1	3702.AT1G70580.2	3702.AT1G70980.1	3702.AT1G72550.1	3702.AT1G74040.1	3702.AT1G74260.1	3702.AT1G76680.2	3702.AT1G79230.1	3702.AT1G79530.1	3702.AT2G01350.1	3702.AT2G02500.1	3702.AT2G04350.1	3702.AT2G05830.1	3702.AT2G05990.2	3702.AT2G18790.1	3702.AT2G19860.1	3702.AT2G20860.1	3702.AT2G22480.1	3702.AT2G31810.1	3702.AT2G34590.1	3702.AT2G39770.1	3702.AT2G43360.1	3702.AT2G43400.1	3702.AT2G43910.2	3702.AT2G44160.1	3702.AT2G44450.1	3702.AT2G45300.1	3702.AT2G45790.1	3702.AT3G02360.2	3702.AT3G02660.1
GO Process GO:0044267 Cellular protein metabolic process 257 2809 0.26 1.50e-18 3702.AT1G01290.1	3702.AT1G01940.1	3702.AT1G02305.1	3702.AT1G04270.1	3702.AT1G04810.1	3702.AT1G04870.2	3702.AT1G08420.1	3702.AT1G09620.1	3702.AT1G09640.1	3702.AT1G10840.1	3702.AT1G10940.2	3702.AT1G12920.1	3702.AT1G13320.3	3702.AT1G13950.1	3702.AT1G15130.1	3702.AT1G16890.3	3702.AT1G18450.1	3702.AT1G20200.1	3702.AT1G22920.1	3702.AT1G25350.2	3702.AT1G25490.1	3702.AT1G26630.1	3702.AT1G28120.1	3702.AT1G29150.1	3702.AT1G30230.2	3702.AT1G31817.1	3702.AT1G35670.1	3702.AT1G36730.1	3702.AT1G45000.1	3702.AT1G47128.1	3702.AT1G48520.1	3702.AT1G49340.2	3702.AT1G50200.1	3702.AT1G50370.1	3702.AT1G50670.1	3702.AT1G51590.1	3702.AT1G51660.1	3702.AT1G51690.3	3702.AT1G51710.1	3702.AT1G54270.1	3702.AT1G55250.1	3702.AT1G55900.1	3702.AT1G57720.1	3702.AT1G59830.1	3702.AT1G61150.1	3702.AT1G64520.1	3702.AT1G65440.1	3702.AT1G66530.1	3702.AT1G69410.1	3702.AT1G70320.1
GO Process GO:0043436 Oxoacid metabolic process 130 1019 0.41 1.56e-18 3702.AT1G01090.1	3702.AT1G04710.1	3702.AT1G09620.1	3702.AT1G09780.1	3702.AT1G11860.3	3702.AT1G16300.1	3702.AT1G18500.1	3702.AT1G20510.1	3702.AT1G25350.2	3702.AT1G31860.1	3702.AT1G32440.1	3702.AT1G37130.1	3702.AT1G43710.1	3702.AT1G48520.1	3702.AT1G48850.1	3702.AT1G49820.1	3702.AT1G50200.1	3702.AT1G52340.1	3702.AT1G58080.1	3702.AT1G59870.1	3702.AT1G66530.1	3702.AT1G70580.2	3702.AT1G70980.1	3702.AT1G72550.1	3702.AT1G74040.1	3702.AT1G74260.1	3702.AT1G76680.2	3702.AT1G79230.1	3702.AT1G79530.1	3702.AT2G01350.1	3702.AT2G02500.1	3702.AT2G04350.1	3702.AT2G05830.1	3702.AT2G05990.2	3702.AT2G18790.1	3702.AT2G19860.1	3702.AT2G20860.1	3702.AT2G22480.1	3702.AT2G31810.1	3702.AT2G34590.1	3702.AT2G39770.1	3702.AT2G43360.1	3702.AT2G43400.1	3702.AT2G43910.2	3702.AT2G44160.1	3702.AT2G44450.1	3702.AT2G45300.1	3702.AT2G45790.1	3702.AT3G02360.2	3702.AT3G02660.1
GO Process GO:0016070 RNA metabolic process 132 1049 0.4 2.21e-18 3702.AT1G02140.1	3702.AT1G02840.1	3702.AT1G06220.2	3702.AT1G08370.1	3702.AT1G09620.1	3702.AT1G09760.1	3702.AT1G09770.1	3702.AT1G11650.2	3702.AT1G18630.1	3702.AT1G20960.1	3702.AT1G25350.2	3702.AT1G26110.1	3702.AT1G30680.1	3702.AT1G31817.1	3702.AT1G32490.1	3702.AT1G43190.1	3702.AT1G44910.1	3702.AT1G48410.2	3702.AT1G48520.1	3702.AT1G48920.1	3702.AT1G49600.1	3702.AT1G50200.1	3702.AT1G51510.1	3702.AT1G55150.1	3702.AT1G59760.1	3702.AT1G63020.2	3702.AT1G63210.1	3702.AT1G65440.1	3702.AT1G66260.2	3702.AT1G66530.1	3702.AT1G67120.1	3702.AT1G70980.1	3702.AT1G71770.1	3702.AT1G72550.1	3702.AT1G74230.1	3702.AT1G79730.1	3702.AT1G80070.1	3702.AT2G06990.1	3702.AT2G13540.1	3702.AT2G15430.1	3702.AT2G15690.1	3702.AT2G17510.2	3702.AT2G20490.1	3702.AT2G21150.1	3702.AT2G21660.1	3702.AT2G27100.1	3702.AT2G33340.1	3702.AT2G33800.1	3702.AT2G36160.1	3702.AT2G37220.1
GO Process GO:0006396 RNA processing 92 582 0.5 4.27e-18 3702.AT1G02140.1	3702.AT1G02840.1	3702.AT1G06220.2	3702.AT1G08370.1	3702.AT1G09760.1	3702.AT1G09770.1	3702.AT1G11650.2	3702.AT1G18630.1	3702.AT1G20960.1	3702.AT1G26110.1	3702.AT1G31817.1	3702.AT1G32490.1	3702.AT1G43190.1	3702.AT1G44910.1	3702.AT1G48920.1	3702.AT1G49600.1	3702.AT1G50200.1	3702.AT1G51510.1	3702.AT1G55150.1	3702.AT1G59760.1	3702.AT1G63020.2	3702.AT1G66260.2	3702.AT1G67120.1	3702.AT1G74230.1	3702.AT1G80070.1	3702.AT2G06990.1	3702.AT2G13540.1	3702.AT2G17510.2	3702.AT2G20490.1	3702.AT2G21150.1	3702.AT2G21660.1	3702.AT2G27100.1	3702.AT2G33340.1	3702.AT2G33800.1	3702.AT2G36160.1	3702.AT2G37220.1	3702.AT3G03920.1	3702.AT3G11270.1	3702.AT3G13300.1	3702.AT3G13570.1	3702.AT3G14100.1	3702.AT3G15000.1	3702.AT3G15010.2	3702.AT3G18165.1	3702.AT3G19130.1	3702.AT3G19760.1	3702.AT3G22330.1	3702.AT3G22590.1	3702.AT3G27550.1	3702.AT3G49430.3
GO Process GO:0006412 Translation 78 437 0.55 6.51e-18 3702.AT1G04270.1	3702.AT1G09620.1	3702.AT1G09640.1	3702.AT1G10840.1	3702.AT1G12920.1	3702.AT1G13950.1	3702.AT1G25350.2	3702.AT1G26630.1	3702.AT1G30230.2	3702.AT1G31817.1	3702.AT1G36730.1	3702.AT1G48520.1	3702.AT1G50200.1	3702.AT1G54270.1	3702.AT1G57720.1	3702.AT1G65440.1	3702.AT1G66530.1	3702.AT1G69410.1	3702.AT1G70980.1	3702.AT1G71770.1	3702.AT1G72550.1	3702.AT1G72730.1	3702.AT2G18110.1	3702.AT2G24050.1	3702.AT2G33800.1	3702.AT2G36160.1	3702.AT2G39990.1	3702.AT2G40290.1	3702.AT2G43030.1	3702.AT2G46280.1	3702.AT2G47110.1	3702.AT3G02660.1	3702.AT3G02760.1	3702.AT3G03600.1	3702.AT3G04600.1	3702.AT3G11250.1	3702.AT3G11710.1	3702.AT3G13490.1	3702.AT3G13920.2	3702.AT3G17465.1	3702.AT3G48110.1	3702.AT3G53890.1	3702.AT3G56150.2	3702.AT3G57290.1	3702.AT3G58140.1	3702.AT3G60240.4	3702.AT3G62120.1	3702.AT3G63140.1	3702.AT3G63490.1	3702.AT4G10320.1
GO Process GO:0050896 Response to stimulus 398 5174 0.19 1.86e-17 3702.AT1G01300.1	3702.AT1G02130.1	3702.AT1G02140.1	3702.AT1G02305.1	3702.AT1G02500.1	3702.AT1G02920.1	3702.AT1G02930.1	3702.AT1G04710.1	3702.AT1G05010.1	3702.AT1G06400.1	3702.AT1G07890.8	3702.AT1G08130.1	3702.AT1G08370.1	3702.AT1G08420.1	3702.AT1G08450.1	3702.AT1G09210.1	3702.AT1G09270.1	3702.AT1G09760.1	3702.AT1G09770.1	3702.AT1G09780.1	3702.AT1G10840.1	3702.AT1G10940.2	3702.AT1G11650.2	3702.AT1G11860.3	3702.AT1G15750.3	3702.AT1G16890.3	3702.AT1G18450.1	3702.AT1G18630.1	3702.AT1G20510.1	3702.AT1G21690.3	3702.AT1G21750.1	3702.AT1G22530.1	3702.AT1G22920.1	3702.AT1G25490.1	3702.AT1G26630.1	3702.AT1G29150.1	3702.AT1G30580.1	3702.AT1G30690.2	3702.AT1G35140.1	3702.AT1G35620.1	3702.AT1G35670.1	3702.AT1G37130.1	3702.AT1G43700.1	3702.AT1G44900.1	3702.AT1G45000.1	3702.AT1G47128.1	3702.AT1G48410.2	3702.AT1G49340.2	3702.AT1G49600.1	3702.AT1G49760.1
GO Process GO:0006520 Cellular amino acid metabolic process 69 374 0.57 1.92e-16 3702.AT1G09620.1	3702.AT1G11860.3	3702.AT1G18500.1	3702.AT1G25350.2	3702.AT1G31860.1	3702.AT1G48520.1	3702.AT1G48850.1	3702.AT1G49820.1	3702.AT1G50200.1	3702.AT1G52340.1	3702.AT1G58080.1	3702.AT1G66530.1	3702.AT1G70580.2	3702.AT1G70980.1	3702.AT1G72550.1	3702.AT1G74040.1	3702.AT1G74260.1	3702.AT1G79230.1	3702.AT2G05830.1	3702.AT2G20860.1	3702.AT2G31810.1	3702.AT2G43400.1	3702.AT2G44160.1	3702.AT2G45300.1	3702.AT3G02660.1	3702.AT3G02760.1	3702.AT3G04600.1	3702.AT3G11710.1	3702.AT3G13490.1	3702.AT3G14390.1	3702.AT3G17390.1	3702.AT3G17810.1	3702.AT3G27740.1	3702.AT3G45300.1	3702.AT3G48110.1	3702.AT3G48560.1	3702.AT3G53580.1	3702.AT3G55610.1	3702.AT3G58140.1	3702.AT3G59970.3	3702.AT3G62120.1	3702.AT4G10320.1	3702.AT4G13780.1	3702.AT4G14710.5	3702.AT4G26300.1	3702.AT4G26870.1	3702.AT4G26910.1	3702.AT4G31180.1	3702.AT4G31810.1	3702.AT4G33510.1
GO Process GO:0044265 Cellular macromolecule catabolic process 88 578 0.49 2.17e-16 3702.AT1G02140.1	3702.AT1G02305.1	3702.AT1G04810.1	3702.AT1G08370.1	3702.AT1G15130.1	3702.AT1G20200.1	3702.AT1G26110.1	3702.AT1G29150.1	3702.AT1G45000.1	3702.AT1G47128.1	3702.AT1G50670.1	3702.AT1G51510.1	3702.AT1G51710.1	3702.AT1G55150.1	3702.AT1G59760.1	3702.AT1G61150.1	3702.AT1G64520.1	3702.AT1G68560.1	3702.AT1G71770.1	3702.AT1G75950.1	3702.AT1G75990.1	3702.AT1G78060.1	3702.AT1G78870.1	3702.AT1G79650.4	3702.AT2G02760.1	3702.AT2G06990.1	3702.AT2G13540.1	3702.AT2G14720.2	3702.AT2G14740.1	3702.AT2G17510.2	3702.AT2G20580.1	3702.AT2G26590.2	3702.AT2G30110.1	3702.AT2G32730.1	3702.AT2G39260.1	3702.AT2G41790.1	3702.AT2G47110.1	3702.AT2G47970.1	3702.AT3G05530.1	3702.AT3G09840.1	3702.AT3G10410.1	3702.AT3G11270.1	3702.AT3G11910.1	3702.AT3G13300.1	3702.AT3G19760.1	3702.AT3G20630.1	3702.AT3G46460.1	3702.AT3G49600.1	3702.AT3G53230.1	3702.AT3G63000.1
GO Process GO:0034622 Cellular protein-containing complex assembly 66 350 0.58 3.89e-16 3702.AT1G04270.1	3702.AT1G06760.1	3702.AT1G10840.1	3702.AT1G12270.1	3702.AT1G15220.2	3702.AT1G20960.1	3702.AT1G22920.1	3702.AT1G29150.1	3702.AT1G31817.1	3702.AT1G36730.1	3702.AT1G44900.1	3702.AT1G48160.1	3702.AT1G62740.1	3702.AT1G64520.1	3702.AT1G67120.1	3702.AT1G71440.1	3702.AT1G74560.3	3702.AT1G80070.1	3702.AT2G07690.1	3702.AT2G16440.1	3702.AT2G16950.1	3702.AT2G19480.1	3702.AT2G20890.1	3702.AT2G28520.1	3702.AT2G30620.1	3702.AT2G31660.1	3702.AT2G33340.1	3702.AT2G35630.1	3702.AT2G36160.1	3702.AT2G39990.1	3702.AT2G46280.1	3702.AT3G11250.1	3702.AT3G22590.1	3702.AT3G46030.1	3702.AT3G56150.2	3702.AT3G57290.1	3702.AT3G60740.1	3702.AT3G61650.1	3702.AT3G62790.1	3702.AT4G01400.1	3702.AT4G02060.2	3702.AT4G02840.2	3702.AT4G09730.1	3702.AT4G11420.1	3702.AT4G14110.1	3702.AT4G19006.1	3702.AT4G25340.1	3702.AT4G26110.1	3702.AT4G29040.1	3702.AT4G32285.2
GO Process GO:0034660 ncRNA metabolic process 60 292 0.62 3.89e-16 3702.AT1G09620.1	3702.AT1G25350.2	3702.AT1G31817.1	3702.AT1G48520.1	3702.AT1G48920.1	3702.AT1G50200.1	3702.AT1G55150.1	3702.AT1G59760.1	3702.AT1G66260.2	3702.AT1G66530.1	3702.AT1G67120.1	3702.AT1G70980.1	3702.AT1G72550.1	3702.AT2G06990.1	3702.AT2G13540.1	3702.AT2G17510.2	3702.AT2G20490.1	3702.AT2G27100.1	3702.AT2G33800.1	3702.AT2G36160.1	3702.AT3G02660.1	3702.AT3G02760.1	3702.AT3G03920.1	3702.AT3G04600.1	3702.AT3G11270.1	3702.AT3G11710.1	3702.AT3G13490.1	3702.AT3G48110.1	3702.AT3G52150.1	3702.AT3G52380.1	3702.AT3G53890.1	3702.AT3G57150.1	3702.AT3G58140.1	3702.AT3G62120.1	3702.AT3G63140.1	3702.AT4G09730.1	3702.AT4G10320.1	3702.AT4G13780.1	3702.AT4G18930.1	3702.AT4G24770.1	3702.AT4G25550.1	3702.AT4G26300.1	3702.AT4G26870.1	3702.AT4G31180.1	3702.AT4G32720.1	3702.AT4G38890.1	3702.AT4G39280.2	3702.AT5G13650.2	3702.AT5G14520.1	3702.AT5G14580.1
GO Process GO:0006417 Regulation of translation 49 200 0.69 1.06e-15 3702.AT1G02140.1	3702.AT1G09640.1	3702.AT1G10840.1	3702.AT1G12920.1	3702.AT1G13950.1	3702.AT1G26110.1	3702.AT1G26630.1	3702.AT1G30230.2	3702.AT1G36730.1	3702.AT1G43190.1	3702.AT1G48410.2	3702.AT1G49760.1	3702.AT1G51510.1	3702.AT1G54270.1	3702.AT1G57720.1	3702.AT1G64790.2	3702.AT1G65440.1	3702.AT1G69410.1	3702.AT1G71770.1	3702.AT1G72730.1	3702.AT2G18110.1	3702.AT2G23350.1	3702.AT2G24050.1	3702.AT2G29190.2	3702.AT2G39990.1	3702.AT2G40290.1	3702.AT2G46280.1	3702.AT3G13460.1	3702.AT3G13920.2	3702.AT3G19760.1	3702.AT3G56150.2	3702.AT3G57290.1	3702.AT3G60240.4	3702.AT3G61240.1	3702.AT3G63140.1	3702.AT4G11420.1	3702.AT4G20360.1	3702.AT4G24800.3	3702.AT4G31790.1	3702.AT4G33250.1	3702.AT4G34110.1	3702.AT5G12110.1	3702.AT5G13650.2	3702.AT5G19510.1	3702.AT5G20920.3	3702.AT5G27640.2	3702.AT5G35620.1	3702.AT5G47880.2	3702.AT5G57870.1 MAGO	AT1G09640
GO Process GO:0065003 Protein-containing complex assembly 71 415 0.54 1.94e-15 3702.AT1G04270.1	3702.AT1G06760.1	3702.AT1G10840.1	3702.AT1G12270.1	3702.AT1G15220.2	3702.AT1G17710.1	3702.AT1G20960.1	3702.AT1G22920.1	3702.AT1G29150.1	3702.AT1G31817.1	3702.AT1G36730.1	3702.AT1G44900.1	3702.AT1G48160.1	3702.AT1G62740.1	3702.AT1G64520.1	3702.AT1G67120.1	3702.AT1G71440.1	3702.AT1G73010.1	3702.AT1G74560.3	3702.AT1G80070.1	3702.AT2G02560.1	3702.AT2G07690.1	3702.AT2G16440.1	3702.AT2G16950.1	3702.AT2G19480.1	3702.AT2G20890.1	3702.AT2G28520.1	3702.AT2G30620.1	3702.AT2G31660.1	3702.AT2G33340.1	3702.AT2G35630.1	3702.AT2G36160.1	3702.AT2G39990.1	3702.AT2G46280.1	3702.AT3G11250.1	3702.AT3G17880.1	3702.AT3G22590.1	3702.AT3G46030.1	3702.AT3G56150.2	3702.AT3G57290.1	3702.AT3G60740.1	3702.AT3G61650.1	3702.AT3G62790.1	3702.AT4G01400.1	3702.AT4G02060.2	3702.AT4G02840.2	3702.AT4G09730.1	3702.AT4G11420.1	3702.AT4G14110.1	3702.AT4G19006.1
GO Process GO:0022607 Cellular component assembly 92 652 0.45 2.54e-15 3702.AT1G04270.1	3702.AT1G06760.1	3702.AT1G10200.1	3702.AT1G10840.1	3702.AT1G12270.1	3702.AT1G15220.2	3702.AT1G17710.1	3702.AT1G20110.1	3702.AT1G20960.1	3702.AT1G22920.1	3702.AT1G26110.1	3702.AT1G29150.1	3702.AT1G31817.1	3702.AT1G36730.1	3702.AT1G44900.1	3702.AT1G48160.1	3702.AT1G51390.1	3702.AT1G62740.1	3702.AT1G64520.1	3702.AT1G67120.1	3702.AT1G71440.1	3702.AT1G73010.1	3702.AT1G74560.3	3702.AT1G80070.1	3702.AT2G02560.1	3702.AT2G07690.1	3702.AT2G16440.1	3702.AT2G16950.1	3702.AT2G19480.1	3702.AT2G20890.1	3702.AT2G22125.1	3702.AT2G28520.1	3702.AT2G30620.1	3702.AT2G31660.1	3702.AT2G33340.1	3702.AT2G35630.1	3702.AT2G36160.1	3702.AT2G39990.1	3702.AT2G41740.1	3702.AT2G46280.1	3702.AT3G11250.1	3702.AT3G14100.1	3702.AT3G17880.1	3702.AT3G19130.1	3702.AT3G20970.1	3702.AT3G22590.1	3702.AT3G46030.1	3702.AT3G56150.2	3702.AT3G57290.1	3702.AT3G57410.1
GO Process GO:0034645 Cellular macromolecule biosynthetic process 122 1040 0.37 7.35e-15 3702.AT1G04270.1	3702.AT1G08130.1	3702.AT1G09620.1	3702.AT1G09640.1	3702.AT1G10840.1	3702.AT1G12920.1	3702.AT1G13950.1	3702.AT1G21690.3	3702.AT1G25350.2	3702.AT1G26630.1	3702.AT1G30230.2	3702.AT1G30680.1	3702.AT1G31817.1	3702.AT1G36730.1	3702.AT1G44900.1	3702.AT1G48520.1	3702.AT1G50200.1	3702.AT1G51590.1	3702.AT1G51630.1	3702.AT1G54270.1	3702.AT1G57720.1	3702.AT1G63020.2	3702.AT1G63160.1	3702.AT1G63210.1	3702.AT1G65440.1	3702.AT1G66530.1	3702.AT1G69410.1	3702.AT1G70980.1	3702.AT1G71770.1	3702.AT1G72550.1	3702.AT1G72730.1	3702.AT1G76400.1	3702.AT1G77470.1	3702.AT1G79730.1	3702.AT2G01720.1	3702.AT2G07690.1	3702.AT2G15430.1	3702.AT2G16440.1	3702.AT2G18110.1	3702.AT2G22125.1	3702.AT2G24050.1	3702.AT2G24490.2	3702.AT2G27960.1	3702.AT2G33800.1	3702.AT2G36160.1	3702.AT2G39770.1	3702.AT2G39990.1	3702.AT2G40290.1	3702.AT2G40550.1	3702.AT2G43030.1
GO Process GO:1901575 Organic substance catabolic process 145 1353 0.33 9.03e-15 3702.AT1G01090.1	3702.AT1G01300.1	3702.AT1G02140.1	3702.AT1G02305.1	3702.AT1G04710.1	3702.AT1G04810.1	3702.AT1G08370.1	3702.AT1G09780.1	3702.AT1G11860.3	3702.AT1G15130.1	3702.AT1G16300.1	3702.AT1G20200.1	3702.AT1G26110.1	3702.AT1G29150.1	3702.AT1G32440.1	3702.AT1G44790.1	3702.AT1G45000.1	3702.AT1G47128.1	3702.AT1G50670.1	3702.AT1G51510.1	3702.AT1G51710.1	3702.AT1G53750.1	3702.AT1G55150.1	3702.AT1G59760.1	3702.AT1G59870.1	3702.AT1G61150.1	3702.AT1G63770.5	3702.AT1G64520.1	3702.AT1G68560.1	3702.AT1G68760.1	3702.AT1G70580.2	3702.AT1G71770.1	3702.AT1G75950.1	3702.AT1G75990.1	3702.AT1G78060.1	3702.AT1G78870.1	3702.AT1G79530.1	3702.AT1G79650.4	3702.AT2G01350.1	3702.AT2G02760.1	3702.AT2G06990.1	3702.AT2G13540.1	3702.AT2G14720.2	3702.AT2G14740.1	3702.AT2G17510.2	3702.AT2G19860.1	3702.AT2G20580.1	3702.AT2G20860.1	3702.AT2G20890.1	3702.AT2G22480.1
GO Process GO:0042221 Response to chemical 229 2590 0.25 9.09e-15 3702.AT1G02130.1	3702.AT1G02140.1	3702.AT1G02500.1	3702.AT1G02920.1	3702.AT1G02930.1	3702.AT1G04710.1	3702.AT1G05010.1	3702.AT1G06400.1	3702.AT1G07890.8	3702.AT1G08420.1	3702.AT1G08450.1	3702.AT1G09210.1	3702.AT1G09780.1	3702.AT1G10840.1	3702.AT1G11650.2	3702.AT1G11860.3	3702.AT1G15750.3	3702.AT1G21750.1	3702.AT1G22530.1	3702.AT1G22920.1	3702.AT1G25490.1	3702.AT1G26630.1	3702.AT1G29150.1	3702.AT1G30580.1	3702.AT1G30690.2	3702.AT1G35140.1	3702.AT1G37130.1	3702.AT1G43700.1	3702.AT1G45000.1	3702.AT1G48410.2	3702.AT1G49760.1	3702.AT1G50200.1	3702.AT1G50670.1	3702.AT1G52340.1	3702.AT1G52760.1	3702.AT1G54270.1	3702.AT1G54990.1	3702.AT1G56340.1	3702.AT1G57720.1	3702.AT1G59610.1	3702.AT1G59870.1	3702.AT1G60420.1	3702.AT1G62380.1	3702.AT1G62740.1	3702.AT1G64520.1	3702.AT1G64550.1	3702.AT1G65970.1	3702.AT1G65980.1	3702.AT1G67120.1	3702.AT1G68560.1
GO Process GO:0044248 Cellular catabolic process 131 1167 0.35 1.15e-14 3702.AT1G02140.1	3702.AT1G02305.1	3702.AT1G02920.1	3702.AT1G02930.1	3702.AT1G04710.1	3702.AT1G04810.1	3702.AT1G07890.8	3702.AT1G08370.1	3702.AT1G11860.3	3702.AT1G15130.1	3702.AT1G20200.1	3702.AT1G26110.1	3702.AT1G29150.1	3702.AT1G44790.1	3702.AT1G45000.1	3702.AT1G47128.1	3702.AT1G50670.1	3702.AT1G51510.1	3702.AT1G51710.1	3702.AT1G55150.1	3702.AT1G59760.1	3702.AT1G59870.1	3702.AT1G61150.1	3702.AT1G63770.5	3702.AT1G64520.1	3702.AT1G65970.1	3702.AT1G65980.1	3702.AT1G68560.1	3702.AT1G68760.1	3702.AT1G70580.2	3702.AT1G71770.1	3702.AT1G75950.1	3702.AT1G75990.1	3702.AT1G78060.1	3702.AT1G78870.1	3702.AT1G79650.4	3702.AT2G01350.1	3702.AT2G02760.1	3702.AT2G06990.1	3702.AT2G13540.1	3702.AT2G14720.2	3702.AT2G14740.1	3702.AT2G17510.2	3702.AT2G20580.1	3702.AT2G20860.1	3702.AT2G20890.1	3702.AT2G26590.2	3702.AT2G26670.1	3702.AT2G29440.1	3702.AT2G30110.1
GO Process GO:0043039 tRNA aminoacylation 26 50 1.02 2.81e-14 3702.AT1G09620.1	3702.AT1G25350.2	3702.AT1G48520.1	3702.AT1G50200.1	3702.AT1G66530.1	3702.AT1G70980.1	3702.AT1G72550.1	3702.AT3G02660.1	3702.AT3G02760.1	3702.AT3G04600.1	3702.AT3G11710.1	3702.AT3G13490.1	3702.AT3G48110.1	3702.AT3G58140.1	3702.AT3G62120.1	3702.AT4G10320.1	3702.AT4G13780.1	3702.AT4G26300.1	3702.AT4G26870.1	3702.AT4G31180.1	3702.AT4G39280.2	3702.AT5G26710.1	3702.AT5G26830.1	3702.AT5G38830.1	3702.AT5G56680.1	3702.AT5G64050.1 AT1G09620	OVA9	GATB	ALATS	AT1G66530	SYNC3	AT1G72550	EMB2768	AT3G02760	AT3G04600	ATKRS-1	OVA5	EDD1	AT3G58140	AT3G62120	AT4G10320	AT4G13780	emb1027	AT4G26870	AT4G31180	AT4G39280	AT5G26710	AT5G26830	AT5G38830	SYNC1
GO Process GO:0009057 Macromolecule catabolic process 98 761 0.41 4.44e-14 3702.AT1G01300.1	3702.AT1G02140.1	3702.AT1G02305.1	3702.AT1G04810.1	3702.AT1G08370.1	3702.AT1G15130.1	3702.AT1G20200.1	3702.AT1G26110.1	3702.AT1G29150.1	3702.AT1G45000.1	3702.AT1G47128.1	3702.AT1G50670.1	3702.AT1G51510.1	3702.AT1G51710.1	3702.AT1G53750.1	3702.AT1G55150.1	3702.AT1G59760.1	3702.AT1G61150.1	3702.AT1G64520.1	3702.AT1G68560.1	3702.AT1G71770.1	3702.AT1G75950.1	3702.AT1G75990.1	3702.AT1G78060.1	3702.AT1G78870.1	3702.AT1G79650.4	3702.AT2G02760.1	3702.AT2G06990.1	3702.AT2G13540.1	3702.AT2G14720.2	3702.AT2G14740.1	3702.AT2G17510.2	3702.AT2G20580.1	3702.AT2G26590.2	3702.AT2G26990.1	3702.AT2G30110.1	3702.AT2G32730.1	3702.AT2G39260.1	3702.AT2G40840.1	3702.AT2G41790.1	3702.AT2G47110.1	3702.AT2G47970.1	3702.AT3G05530.1	3702.AT3G09840.1	3702.AT3G10410.1	3702.AT3G11270.1	3702.AT3G11910.1	3702.AT3G13300.1	3702.AT3G19760.1	3702.AT3G20630.1
GO Process GO:0006418 tRNA aminoacylation for protein translation 25 47 1.03 6.63e-14 3702.AT1G09620.1	3702.AT1G25350.2	3702.AT1G50200.1	3702.AT1G66530.1	3702.AT1G70980.1	3702.AT1G72550.1	3702.AT3G02660.1	3702.AT3G02760.1	3702.AT3G04600.1	3702.AT3G11710.1	3702.AT3G13490.1	3702.AT3G48110.1	3702.AT3G58140.1	3702.AT3G62120.1	3702.AT4G10320.1	3702.AT4G13780.1	3702.AT4G26300.1	3702.AT4G26870.1	3702.AT4G31180.1	3702.AT4G39280.2	3702.AT5G26710.1	3702.AT5G26830.1	3702.AT5G38830.1	3702.AT5G56680.1	3702.AT5G64050.1 AT1G09620	OVA9	ALATS	AT1G66530	SYNC3	AT1G72550	EMB2768	AT3G02760	AT3G04600	ATKRS-1	OVA5	EDD1	AT3G58140	AT3G62120	AT4G10320	AT4G13780	emb1027	AT4G26870	AT4G31180	AT4G39280	AT5G26710	AT5G26830	AT5G38830	SYNC1	ERS
GO Process GO:0016071 mRNA metabolic process 67 408 0.52 8.06e-14 3702.AT1G02140.1	3702.AT1G02840.1	3702.AT1G06220.2	3702.AT1G08370.1	3702.AT1G09760.1	3702.AT1G09770.1	3702.AT1G11650.2	3702.AT1G18630.1	3702.AT1G20960.1	3702.AT1G26110.1	3702.AT1G32490.1	3702.AT1G43190.1	3702.AT1G44910.1	3702.AT1G49600.1	3702.AT1G51510.1	3702.AT1G55150.1	3702.AT1G63210.1	3702.AT1G65440.1	3702.AT1G71770.1	3702.AT1G74230.1	3702.AT1G80070.1	3702.AT2G06990.1	3702.AT2G13540.1	3702.AT2G21660.1	3702.AT2G27100.1	3702.AT2G33340.1	3702.AT2G37220.1	3702.AT2G39260.1	3702.AT3G13300.1	3702.AT3G13570.1	3702.AT3G14100.1	3702.AT3G15000.1	3702.AT3G15010.2	3702.AT3G18165.1	3702.AT3G19130.1	3702.AT3G19760.1	3702.AT3G22590.1	3702.AT3G27550.1	3702.AT3G49430.3	3702.AT3G50670.1	3702.AT3G52380.1	3702.AT3G53460.4	3702.AT3G55460.1	3702.AT3G57150.1	3702.AT3G61240.1	3702.AT3G61860.1	3702.AT3G62310.1	3702.AT4G00830.4	3702.AT4G02840.2	3702.AT4G15900.1
GO Process GO:0009059 Macromolecule biosynthetic process 123 1096 0.35 9.75e-14 3702.AT1G04270.1	3702.AT1G08130.1	3702.AT1G09620.1	3702.AT1G09640.1	3702.AT1G10840.1	3702.AT1G12920.1	3702.AT1G13950.1	3702.AT1G21690.3	3702.AT1G25350.2	3702.AT1G26630.1	3702.AT1G30230.2	3702.AT1G30680.1	3702.AT1G31817.1	3702.AT1G36730.1	3702.AT1G44900.1	3702.AT1G48520.1	3702.AT1G50200.1	3702.AT1G51590.1	3702.AT1G51630.1	3702.AT1G54270.1	3702.AT1G57720.1	3702.AT1G63020.2	3702.AT1G63160.1	3702.AT1G63210.1	3702.AT1G65440.1	3702.AT1G66530.1	3702.AT1G69410.1	3702.AT1G70980.1	3702.AT1G71770.1	3702.AT1G72550.1	3702.AT1G72730.1	3702.AT1G76400.1	3702.AT1G77470.1	3702.AT1G79730.1	3702.AT2G01720.1	3702.AT2G07690.1	3702.AT2G15430.1	3702.AT2G16440.1	3702.AT2G18110.1	3702.AT2G22125.1	3702.AT2G24050.1	3702.AT2G24490.2	3702.AT2G27960.1	3702.AT2G33800.1	3702.AT2G36160.1	3702.AT2G39770.1	3702.AT2G39990.1	3702.AT2G40290.1	3702.AT2G40550.1	3702.AT2G43030.1
GO Process GO:1901565 Organonitrogen compound catabolic process 92 699 0.42 1.04e-13 3702.AT1G01300.1	3702.AT1G02305.1	3702.AT1G04810.1	3702.AT1G11860.3	3702.AT1G15130.1	3702.AT1G20200.1	3702.AT1G29150.1	3702.AT1G44790.1	3702.AT1G45000.1	3702.AT1G47128.1	3702.AT1G50670.1	3702.AT1G51710.1	3702.AT1G53750.1	3702.AT1G59870.1	3702.AT1G61150.1	3702.AT1G63770.5	3702.AT1G64520.1	3702.AT1G68760.1	3702.AT1G70580.2	3702.AT1G75950.1	3702.AT1G75990.1	3702.AT1G78870.1	3702.AT1G79650.4	3702.AT2G01350.1	3702.AT2G02760.1	3702.AT2G14720.2	3702.AT2G14740.1	3702.AT2G20580.1	3702.AT2G20860.1	3702.AT2G20890.1	3702.AT2G26590.2	3702.AT2G26670.1	3702.AT2G26990.1	3702.AT2G30110.1	3702.AT2G32730.1	3702.AT2G41790.1	3702.AT2G43400.1	3702.AT2G43910.2	3702.AT2G44450.1	3702.AT2G47110.1	3702.AT2G47970.1	3702.AT3G05530.1	3702.AT3G09840.1	3702.AT3G10410.1	3702.AT3G11270.1	3702.AT3G11910.1	3702.AT3G17810.1	3702.AT3G20630.1	3702.AT3G45300.1	3702.AT3G46460.1
GO Process GO:0006397 mRNA processing 58 320 0.56 1.51e-13 3702.AT1G02140.1	3702.AT1G02840.1	3702.AT1G06220.2	3702.AT1G08370.1	3702.AT1G09760.1	3702.AT1G09770.1	3702.AT1G11650.2	3702.AT1G18630.1	3702.AT1G20960.1	3702.AT1G26110.1	3702.AT1G32490.1	3702.AT1G43190.1	3702.AT1G44910.1	3702.AT1G49600.1	3702.AT1G51510.1	3702.AT1G74230.1	3702.AT1G80070.1	3702.AT2G06990.1	3702.AT2G13540.1	3702.AT2G21660.1	3702.AT2G27100.1	3702.AT2G33340.1	3702.AT2G37220.1	3702.AT3G13300.1	3702.AT3G13570.1	3702.AT3G14100.1	3702.AT3G15000.1	3702.AT3G15010.2	3702.AT3G18165.1	3702.AT3G19130.1	3702.AT3G19760.1	3702.AT3G22590.1	3702.AT3G27550.1	3702.AT3G49430.3	3702.AT3G50670.1	3702.AT3G52380.1	3702.AT3G53460.4	3702.AT3G55460.1	3702.AT3G61240.1	3702.AT3G61860.1	3702.AT3G62310.1	3702.AT4G00830.4	3702.AT4G02840.2	3702.AT4G15900.1	3702.AT4G24770.1	3702.AT4G25550.1	3702.AT4G27000.1	3702.AT4G31580.1	3702.AT4G39260.1	3702.AT5G07350.2
GO Process GO:0051246 Regulation of protein metabolic process 76 521 0.47 2.71e-13 3702.AT1G02140.1	3702.AT1G04810.1	3702.AT1G09640.1	3702.AT1G10840.1	3702.AT1G12920.1	3702.AT1G13320.3	3702.AT1G13950.1	3702.AT1G20200.1	3702.AT1G22920.1	3702.AT1G25490.1	3702.AT1G26110.1	3702.AT1G26630.1	3702.AT1G30230.2	3702.AT1G36730.1	3702.AT1G43190.1	3702.AT1G48410.2	3702.AT1G49760.1	3702.AT1G51510.1	3702.AT1G51660.1	3702.AT1G51690.3	3702.AT1G54270.1	3702.AT1G57720.1	3702.AT1G64790.2	3702.AT1G65440.1	3702.AT1G69410.1	3702.AT1G71770.1	3702.AT1G71860.1	3702.AT1G72730.1	3702.AT1G75990.1	3702.AT1G79280.2	3702.AT2G18110.1	3702.AT2G20580.1	3702.AT2G23350.1	3702.AT2G24050.1	3702.AT2G26590.2	3702.AT2G27960.1	3702.AT2G27970.1	3702.AT2G29190.2	3702.AT2G32730.1	3702.AT2G39990.1	3702.AT2G40290.1	3702.AT2G46280.1	3702.AT3G13460.1	3702.AT3G13920.2	3702.AT3G19760.1	3702.AT3G25800.1	3702.AT3G48530.1	3702.AT3G53230.1	3702.AT3G56150.2	3702.AT3G57290.1
GO Process GO:0009056 Catabolic process 156 1576 0.3 2.78e-13 3702.AT1G01090.1	3702.AT1G01300.1	3702.AT1G02140.1	3702.AT1G02305.1	3702.AT1G02920.1	3702.AT1G02930.1	3702.AT1G04710.1	3702.AT1G04810.1	3702.AT1G07890.8	3702.AT1G08370.1	3702.AT1G09780.1	3702.AT1G11860.3	3702.AT1G15130.1	3702.AT1G16300.1	3702.AT1G20200.1	3702.AT1G26110.1	3702.AT1G29150.1	3702.AT1G32440.1	3702.AT1G44790.1	3702.AT1G45000.1	3702.AT1G47128.1	3702.AT1G49660.1	3702.AT1G50670.1	3702.AT1G51510.1	3702.AT1G51710.1	3702.AT1G53750.1	3702.AT1G55150.1	3702.AT1G59760.1	3702.AT1G59870.1	3702.AT1G61150.1	3702.AT1G63770.5	3702.AT1G64520.1	3702.AT1G65970.1	3702.AT1G65980.1	3702.AT1G68560.1	3702.AT1G68760.1	3702.AT1G70580.2	3702.AT1G71770.1	3702.AT1G75950.1	3702.AT1G75990.1	3702.AT1G78060.1	3702.AT1G78870.1	3702.AT1G79530.1	3702.AT1G79650.4	3702.AT2G01350.1	3702.AT2G02760.1	3702.AT2G06990.1	3702.AT2G13540.1	3702.AT2G14720.2	3702.AT2G14740.1
GO Process GO:0072594 Establishment of protein localization to organelle 46 212 0.64 4.04e-13 3702.AT1G01910.4	3702.AT1G02690.2	3702.AT1G09270.1	3702.AT1G15130.1	3702.AT1G48160.1	3702.AT1G48900.1	3702.AT1G55900.1	3702.AT1G72750.1	3702.AT1G79280.2	3702.AT2G04030.1	3702.AT2G14720.2	3702.AT2G14740.1	3702.AT2G16640.1	3702.AT2G16950.1	3702.AT2G17390.1	3702.AT2G20890.1	3702.AT2G31660.1	3702.AT2G35795.1	3702.AT2G36070.1	3702.AT2G37410.1	3702.AT2G39960.1	3702.AT2G45000.1	3702.AT2G45790.1	3702.AT2G46520.1	3702.AT3G06720.1	3702.AT3G27080.1	3702.AT3G47520.1	3702.AT3G48870.1	3702.AT3G49560.1	3702.AT3G59020.2	3702.AT3G59280.1	3702.AT3G63130.2	3702.AT4G02150.1	3702.AT4G16143.2	3702.AT4G19003.2	3702.AT4G24280.1	3702.AT4G35450.5	3702.AT5G06140.1	3702.AT5G11710.1	3702.AT5G40930.1	3702.AT5G43970.1	3702.AT5G49910.1	3702.AT5G50460.1	3702.AT5G50920.1	3702.AT5G53480.1	3702.AT5G58590.1 AT1G01910	IMPA-6	IMPA-4	AT1G15130	AT1G48160
GO Process GO:0033365 Protein localization to organelle 49 243 0.61 6.21e-13 3702.AT1G01910.4	3702.AT1G02690.2	3702.AT1G09270.1	3702.AT1G15130.1	3702.AT1G48160.1	3702.AT1G48900.1	3702.AT1G55900.1	3702.AT1G72750.1	3702.AT1G79280.2	3702.AT2G04030.1	3702.AT2G14720.2	3702.AT2G14740.1	3702.AT2G16640.1	3702.AT2G16950.1	3702.AT2G17390.1	3702.AT2G20890.1	3702.AT2G22125.1	3702.AT2G31660.1	3702.AT2G35795.1	3702.AT2G36070.1	3702.AT2G37410.1	3702.AT2G39960.1	3702.AT2G45000.1	3702.AT2G45790.1	3702.AT2G46520.1	3702.AT3G06720.1	3702.AT3G27080.1	3702.AT3G47520.1	3702.AT3G48870.1	3702.AT3G49560.1	3702.AT3G59020.2	3702.AT3G59280.1	3702.AT3G63130.2	3702.AT4G02150.1	3702.AT4G16143.2	3702.AT4G19003.2	3702.AT4G24280.1	3702.AT4G35450.5	3702.AT5G06140.1	3702.AT5G11710.1	3702.AT5G40930.1	3702.AT5G43970.1	3702.AT5G49910.1	3702.AT5G50460.1	3702.AT5G50920.1	3702.AT5G51430.1	3702.AT5G53480.1	3702.AT5G58590.1	3702.AT5G63220.1 AT1G01910	IMPA-6
GO Process GO:0006950 Response to stress 252 3081 0.22 8.63e-13 3702.AT1G02305.1	3702.AT1G02920.1	3702.AT1G02930.1	3702.AT1G05010.1	3702.AT1G07890.8	3702.AT1G08130.1	3702.AT1G08370.1	3702.AT1G08450.1	3702.AT1G09210.1	3702.AT1G09760.1	3702.AT1G09770.1	3702.AT1G09780.1	3702.AT1G11650.2	3702.AT1G16890.3	3702.AT1G18630.1	3702.AT1G20510.1	3702.AT1G21690.3	3702.AT1G21750.1	3702.AT1G25490.1	3702.AT1G26630.1	3702.AT1G30580.1	3702.AT1G35140.1	3702.AT1G35620.1	3702.AT1G37130.1	3702.AT1G43700.1	3702.AT1G44900.1	3702.AT1G45000.1	3702.AT1G47128.1	3702.AT1G48410.2	3702.AT1G49600.1	3702.AT1G50500.2	3702.AT1G50670.1	3702.AT1G51660.1	3702.AT1G51760.1	3702.AT1G52260.1	3702.AT1G52340.1	3702.AT1G52760.1	3702.AT1G55250.1	3702.AT1G56340.1	3702.AT1G59870.1	3702.AT1G62380.1	3702.AT1G63160.1	3702.AT1G64520.1	3702.AT1G64550.1	3702.AT1G64760.2	3702.AT1G64790.2	3702.AT1G65970.1	3702.AT1G65980.1	3702.AT1G68760.1	3702.AT1G70660.1
GO Process GO:0055086 Nucleobase-containing small molecule metabolic process 58 337 0.54 1.02e-12 3702.AT1G01090.1	3702.AT1G09780.1	3702.AT1G16300.1	3702.AT1G16350.1	3702.AT1G27450.3	3702.AT1G30680.1	3702.AT1G31070.2	3702.AT1G32440.1	3702.AT1G53500.1	3702.AT1G59870.1	3702.AT1G60810.1	3702.AT1G63000.1	3702.AT1G68760.1	3702.AT1G73250.1	3702.AT1G74260.1	3702.AT1G78570.1	3702.AT1G79470.1	3702.AT1G79530.1	3702.AT2G01350.1	3702.AT2G17340.1	3702.AT2G19860.1	3702.AT2G22480.1	3702.AT2G27860.1	3702.AT2G34590.1	3702.AT2G38700.1	3702.AT2G39770.1	3702.AT2G45790.1	3702.AT3G03250.1	3702.AT3G06650.1	3702.AT3G12780.1	3702.AT3G14790.1	3702.AT3G17810.1	3702.AT3G21110.1	3702.AT3G22960.1	3702.AT3G27190.1	3702.AT3G27740.1	3702.AT3G52930.1	3702.AT3G53520.4	3702.AT3G56490.1	3702.AT3G62830.1	3702.AT4G11820.2	3702.AT4G18930.1	3702.AT4G22570.1	3702.AT4G24620.1	3702.AT4G25280.1	3702.AT4G26910.1	3702.AT4G32180.1	3702.AT4G38800.1	3702.AT5G18070.1	3702.AT5G26667.1
GO Process GO:0033554 Cellular response to stress 109 956 0.36 1.55e-12 3702.AT1G07890.8	3702.AT1G08130.1	3702.AT1G08450.1	3702.AT1G09210.1	3702.AT1G09770.1	3702.AT1G16890.3	3702.AT1G21690.3	3702.AT1G21750.1	3702.AT1G35140.1	3702.AT1G35620.1	3702.AT1G43700.1	3702.AT1G44900.1	3702.AT1G45000.1	3702.AT1G49600.1	3702.AT1G50670.1	3702.AT1G51660.1	3702.AT1G52260.1	3702.AT1G56340.1	3702.AT1G59870.1	3702.AT1G62380.1	3702.AT1G63160.1	3702.AT1G65970.1	3702.AT1G65980.1	3702.AT1G68760.1	3702.AT1G70660.1	3702.AT1G71260.1	3702.AT1G73010.1	3702.AT1G74560.3	3702.AT1G77470.1	3702.AT1G77510.1	3702.AT1G78850.1	3702.AT1G78870.1	3702.AT1G79650.4	3702.AT2G02470.1	3702.AT2G02760.1	3702.AT2G07690.1	3702.AT2G16430.2	3702.AT2G16440.1	3702.AT2G19480.1	3702.AT2G20270.2	3702.AT2G22300.1	3702.AT2G24490.2	3702.AT2G27170.2	3702.AT2G30110.1	3702.AT2G32920.1	3702.AT2G33340.1	3702.AT2G36060.2	3702.AT2G40550.1	3702.AT2G41100.4	3702.AT2G41430.4
GO Process GO:0030163 Protein catabolic process 71 484 0.47 1.58e-12 3702.AT1G01300.1	3702.AT1G02305.1	3702.AT1G04810.1	3702.AT1G15130.1	3702.AT1G20200.1	3702.AT1G29150.1	3702.AT1G45000.1	3702.AT1G47128.1	3702.AT1G50670.1	3702.AT1G51710.1	3702.AT1G53750.1	3702.AT1G61150.1	3702.AT1G64520.1	3702.AT1G75950.1	3702.AT1G75990.1	3702.AT1G78870.1	3702.AT1G79650.4	3702.AT2G02760.1	3702.AT2G14720.2	3702.AT2G14740.1	3702.AT2G20580.1	3702.AT2G26590.2	3702.AT2G26990.1	3702.AT2G30110.1	3702.AT2G32730.1	3702.AT2G41790.1	3702.AT2G47110.1	3702.AT2G47970.1	3702.AT3G05530.1	3702.AT3G09840.1	3702.AT3G10410.1	3702.AT3G11270.1	3702.AT3G11910.1	3702.AT3G20630.1	3702.AT3G46460.1	3702.AT3G49600.1	3702.AT3G53230.1	3702.AT3G63000.1	3702.AT4G02570.4	3702.AT4G11260.1	3702.AT4G15410.1	3702.AT4G17510.1	3702.AT4G19003.2	3702.AT4G19006.1	3702.AT4G24820.1	3702.AT4G28470.1	3702.AT4G29040.1	3702.AT4G30890.3	3702.AT4G38630.1	3702.AT5G05780.1
GO Process GO:0006413 Translational initiation 24 51 0.98 1.72e-12 3702.AT1G10840.1	3702.AT1G13950.1	3702.AT1G26630.1	3702.AT1G36730.1	3702.AT1G54270.1	3702.AT1G69410.1	3702.AT1G71770.1	3702.AT1G72730.1	3702.AT2G24050.1	3702.AT2G39990.1	3702.AT2G40290.1	3702.AT2G46280.1	3702.AT3G13920.2	3702.AT3G56150.2	3702.AT3G57290.1	3702.AT3G60240.4	3702.AT4G11420.1	3702.AT4G19210.1	3702.AT4G33250.1	3702.AT4G34110.1	3702.AT5G20920.3	3702.AT5G27640.2	3702.AT5G35620.1	3702.AT5G57870.1 TIF3H1	ELF5A-1	FBR12	AT1G36730	EIF4A-2	ELF5A-3	PAB5	AT1G72730	eIFiso4G2	EIF2	AT2G40290	TRIP-1	EIF4A1	EIF3C	EIF3E	EIF4G	EIF3A	ABCE2	EIF3K	PAB2	EIF2B	TIF3B1	LSP1	eIFiso4G1
GO Process GO:0065007 Biological regulation 375 5216 0.16 4.47e-12 3702.AT1G01820.1	3702.AT1G01960.1	3702.AT1G02130.1	3702.AT1G02140.1	3702.AT1G02305.1	3702.AT1G02840.1	3702.AT1G04810.1	3702.AT1G06220.2	3702.AT1G06400.1	3702.AT1G06760.1	3702.AT1G07140.1	3702.AT1G07670.1	3702.AT1G08370.1	3702.AT1G08420.1	3702.AT1G08450.1	3702.AT1G08680.4	3702.AT1G08880.1	3702.AT1G09210.1	3702.AT1G09300.1	3702.AT1G09620.1	3702.AT1G09640.1	3702.AT1G09770.1	3702.AT1G10840.1	3702.AT1G10940.2	3702.AT1G12920.1	3702.AT1G13320.3	3702.AT1G13950.1	3702.AT1G15750.3	3702.AT1G15910.1	3702.AT1G16300.1	3702.AT1G18450.1	3702.AT1G18630.1	3702.AT1G20110.1	3702.AT1G20200.1	3702.AT1G20330.1	3702.AT1G20693.1	3702.AT1G21750.1	3702.AT1G22530.1	3702.AT1G22920.1	3702.AT1G25490.1	3702.AT1G26110.1	3702.AT1G26630.1	3702.AT1G27450.3	3702.AT1G30230.2	3702.AT1G30580.1	3702.AT1G30690.2	3702.AT1G32490.1	3702.AT1G35620.1	3702.AT1G35670.1	3702.AT1G36730.1
GO Process GO:0022613 Ribonucleoprotein complex biogenesis 52 295 0.55 9.61e-12 3702.AT1G04270.1	3702.AT1G10840.1	3702.AT1G20960.1	3702.AT1G31817.1	3702.AT1G36730.1	3702.AT1G48920.1	3702.AT1G55150.1	3702.AT1G59760.1	3702.AT1G66260.2	3702.AT1G67120.1	3702.AT1G80070.1	3702.AT2G06990.1	3702.AT2G16950.1	3702.AT2G17510.2	3702.AT2G20490.1	3702.AT2G31660.1	3702.AT2G33340.1	3702.AT2G33800.1	3702.AT2G36160.1	3702.AT2G39990.1	3702.AT2G46280.1	3702.AT3G03920.1	3702.AT3G05060.1	3702.AT3G11250.1	3702.AT3G11270.1	3702.AT3G22590.1	3702.AT3G52150.1	3702.AT3G52380.1	3702.AT3G53890.1	3702.AT3G56150.2	3702.AT3G57150.1	3702.AT3G57290.1	3702.AT3G57660.1	3702.AT3G63140.1	3702.AT4G02840.2	3702.AT4G09730.1	3702.AT4G11420.1	3702.AT4G19210.1	3702.AT4G24770.1	3702.AT4G25550.1	3702.AT4G32720.1	3702.AT4G33250.1	3702.AT5G13650.2	3702.AT5G14520.1	3702.AT5G14580.1	3702.AT5G17020.1	3702.AT5G20920.3	3702.AT5G22330.1	3702.AT5G27120.1	3702.AT5G27640.2
GO Process GO:0044257 Cellular protein catabolic process 66 448 0.47 1.04e-11 3702.AT1G02305.1	3702.AT1G04810.1	3702.AT1G15130.1	3702.AT1G20200.1	3702.AT1G29150.1	3702.AT1G45000.1	3702.AT1G47128.1	3702.AT1G50670.1	3702.AT1G51710.1	3702.AT1G61150.1	3702.AT1G64520.1	3702.AT1G75950.1	3702.AT1G75990.1	3702.AT1G78870.1	3702.AT1G79650.4	3702.AT2G02760.1	3702.AT2G14720.2	3702.AT2G14740.1	3702.AT2G20580.1	3702.AT2G26590.2	3702.AT2G30110.1	3702.AT2G32730.1	3702.AT2G41790.1	3702.AT2G47110.1	3702.AT2G47970.1	3702.AT3G05530.1	3702.AT3G09840.1	3702.AT3G10410.1	3702.AT3G11270.1	3702.AT3G11910.1	3702.AT3G20630.1	3702.AT3G46460.1	3702.AT3G49600.1	3702.AT3G53230.1	3702.AT3G63000.1	3702.AT4G02570.4	3702.AT4G11260.1	3702.AT4G15410.1	3702.AT4G17510.1	3702.AT4G19003.2	3702.AT4G19006.1	3702.AT4G24820.1	3702.AT4G28470.1	3702.AT4G29040.1	3702.AT4G30890.3	3702.AT4G38630.1	3702.AT5G05780.1	3702.AT5G06460.1	3702.AT5G06600.1	3702.AT5G09900.3
GO Process GO:0051603 Proteolysis involved in cellular protein catabolic process 65 439 0.47 1.28e-11 3702.AT1G02305.1	3702.AT1G04810.1	3702.AT1G15130.1	3702.AT1G20200.1	3702.AT1G29150.1	3702.AT1G45000.1	3702.AT1G47128.1	3702.AT1G50670.1	3702.AT1G51710.1	3702.AT1G61150.1	3702.AT1G64520.1	3702.AT1G75950.1	3702.AT1G75990.1	3702.AT1G78870.1	3702.AT1G79650.4	3702.AT2G02760.1	3702.AT2G14720.2	3702.AT2G14740.1	3702.AT2G20580.1	3702.AT2G26590.2	3702.AT2G30110.1	3702.AT2G32730.1	3702.AT2G41790.1	3702.AT2G47110.1	3702.AT2G47970.1	3702.AT3G05530.1	3702.AT3G09840.1	3702.AT3G10410.1	3702.AT3G11270.1	3702.AT3G11910.1	3702.AT3G20630.1	3702.AT3G46460.1	3702.AT3G49600.1	3702.AT3G53230.1	3702.AT3G63000.1	3702.AT4G02570.4	3702.AT4G11260.1	3702.AT4G15410.1	3702.AT4G17510.1	3702.AT4G19003.2	3702.AT4G19006.1	3702.AT4G24820.1	3702.AT4G28470.1	3702.AT4G29040.1	3702.AT4G30890.3	3702.AT4G38630.1	3702.AT5G05780.1	3702.AT5G06460.1	3702.AT5G06600.1	3702.AT5G09900.3
GO Process GO:0019941 Modification-dependent protein catabolic process 58 362 0.51 1.37e-11 3702.AT1G04810.1	3702.AT1G15130.1	3702.AT1G20200.1	3702.AT1G29150.1	3702.AT1G45000.1	3702.AT1G50670.1	3702.AT1G51710.1	3702.AT1G61150.1	3702.AT1G64520.1	3702.AT1G75950.1	3702.AT1G75990.1	3702.AT1G78870.1	3702.AT1G79650.4	3702.AT2G02760.1	3702.AT2G14720.2	3702.AT2G14740.1	3702.AT2G20580.1	3702.AT2G26590.2	3702.AT2G30110.1	3702.AT2G32730.1	3702.AT2G47110.1	3702.AT2G47970.1	3702.AT3G09840.1	3702.AT3G11270.1	3702.AT3G11910.1	3702.AT3G20630.1	3702.AT3G46460.1	3702.AT3G49600.1	3702.AT3G53230.1	3702.AT3G63000.1	3702.AT4G02570.4	3702.AT4G11260.1	3702.AT4G15410.1	3702.AT4G17510.1	3702.AT4G19003.2	3702.AT4G19006.1	3702.AT4G24820.1	3702.AT4G28470.1	3702.AT4G29040.1	3702.AT4G30890.3	3702.AT4G38630.1	3702.AT5G05780.1	3702.AT5G06460.1	3702.AT5G06600.1	3702.AT5G09900.3	3702.AT5G14250.1	3702.AT5G15400.1	3702.AT5G20570.2	3702.AT5G22030.1	3702.AT5G23540.1
GO Process GO:0006511 Ubiquitin-dependent protein catabolic process 57 352 0.51 1.48e-11 3702.AT1G04810.1	3702.AT1G15130.1	3702.AT1G20200.1	3702.AT1G29150.1	3702.AT1G45000.1	3702.AT1G50670.1	3702.AT1G51710.1	3702.AT1G61150.1	3702.AT1G64520.1	3702.AT1G75950.1	3702.AT1G75990.1	3702.AT1G78870.1	3702.AT1G79650.4	3702.AT2G02760.1	3702.AT2G14720.2	3702.AT2G14740.1	3702.AT2G20580.1	3702.AT2G26590.2	3702.AT2G30110.1	3702.AT2G32730.1	3702.AT2G47110.1	3702.AT2G47970.1	3702.AT3G09840.1	3702.AT3G11270.1	3702.AT3G11910.1	3702.AT3G20630.1	3702.AT3G46460.1	3702.AT3G49600.1	3702.AT3G53230.1	3702.AT3G63000.1	3702.AT4G02570.4	3702.AT4G11260.1	3702.AT4G15410.1	3702.AT4G17510.1	3702.AT4G19003.2	3702.AT4G19006.1	3702.AT4G24820.1	3702.AT4G28470.1	3702.AT4G29040.1	3702.AT4G30890.3	3702.AT4G38630.1	3702.AT5G05780.1	3702.AT5G06460.1	3702.AT5G06600.1	3702.AT5G09900.3	3702.AT5G14250.1	3702.AT5G15400.1	3702.AT5G20570.2	3702.AT5G22030.1	3702.AT5G23540.1
GO Process GO:0006508 Proteolysis 90 745 0.39 1.52e-11 3702.AT1G01300.1	3702.AT1G02305.1	3702.AT1G04810.1	3702.AT1G06900.1	3702.AT1G09300.1	3702.AT1G10840.1	3702.AT1G15130.1	3702.AT1G20200.1	3702.AT1G22920.1	3702.AT1G28120.1	3702.AT1G29150.1	3702.AT1G45000.1	3702.AT1G47128.1	3702.AT1G50670.1	3702.AT1G51710.1	3702.AT1G61150.1	3702.AT1G63770.5	3702.AT1G64520.1	3702.AT1G75950.1	3702.AT1G75990.1	3702.AT1G78870.1	3702.AT1G79340.1	3702.AT1G79650.4	3702.AT2G02760.1	3702.AT2G14720.2	3702.AT2G14740.1	3702.AT2G20580.1	3702.AT2G26590.2	3702.AT2G26990.1	3702.AT2G30110.1	3702.AT2G32730.1	3702.AT2G39960.1	3702.AT2G41790.1	3702.AT2G45240.1	3702.AT2G47110.1	3702.AT2G47390.1	3702.AT2G47970.1	3702.AT3G03380.1	3702.AT3G05530.1	3702.AT3G09840.1	3702.AT3G10410.1	3702.AT3G11270.1	3702.AT3G11910.1	3702.AT3G20630.1	3702.AT3G46460.1	3702.AT3G49600.1	3702.AT3G52640.2	3702.AT3G53230.1	3702.AT3G59990.4	3702.AT3G61140.1
GO Process GO:0006888 Endoplasmic reticulum to golgi vesicle-mediated transport 24 61 0.9 3.46e-11 3702.AT1G02130.1	3702.AT1G11890.1	3702.AT1G30630.1	3702.AT1G52360.2	3702.AT1G62020.1	3702.AT1G79990.1	3702.AT2G17980.1	3702.AT2G21390.1	3702.AT2G30050.1	3702.AT2G45200.2	3702.AT3G01340.1	3702.AT3G07100.1	3702.AT3G15980.5	3702.AT3G22845.1	3702.AT3G24350.2	3702.AT3G27530.1	3702.AT3G44340.1	3702.AT3G63460.1	3702.AT4G02080.1	3702.AT4G31480.2	3702.AT4G31490.1	3702.AT4G32640.2	3702.AT4G34450.1	3702.AT5G05010.1 RA-5	SEC22	AT1G30630	AT1G52360	AT1G62020	AT1G79990	ATSLY1	AT2G21390	AT2G30050	GOS12	AT3G01340	ERMO2	AT3G15980	AT3G22845	SYP32	GC6	CEF	AT3G63460	SAR2	AT4G31480	AT4G31490	AT4G32640	AT4G34450	AT5G05010
GO Process GO:1901362 Organic cyclic compound biosynthetic process 92 798 0.36 8.75e-11 3702.AT1G01090.1	3702.AT1G01290.1	3702.AT1G07890.8	3702.AT1G08130.1	3702.AT1G16350.1	3702.AT1G20330.1	3702.AT1G27450.3	3702.AT1G30680.1	3702.AT1G31070.2	3702.AT1G31860.1	3702.AT1G48850.1	3702.AT1G52340.1	3702.AT1G52760.1	3702.AT1G53500.1	3702.AT1G58080.1	3702.AT1G60810.1	3702.AT1G63000.1	3702.AT1G63020.2	3702.AT1G63210.1	3702.AT1G65440.1	3702.AT1G68760.1	3702.AT1G73250.1	3702.AT1G74260.1	3702.AT1G78570.1	3702.AT1G79470.1	3702.AT1G79730.1	3702.AT2G01350.1	3702.AT2G07050.1	3702.AT2G15430.1	3702.AT2G17340.1	3702.AT2G20860.1	3702.AT2G22450.1	3702.AT2G26670.1	3702.AT2G27860.1	3702.AT2G34590.1	3702.AT2G36880.2	3702.AT2G38700.1	3702.AT2G39770.1	3702.AT2G43360.1	3702.AT2G45300.1	3702.AT2G45790.1	3702.AT3G02780.1	3702.AT3G06650.1	3702.AT3G14790.1	3702.AT3G17390.1	3702.AT3G21110.1	3702.AT3G22590.1	3702.AT3G27190.1	3702.AT3G27740.1	3702.AT3G44310.1
[truncated: 1,444 more rows]
[truncated: 1,999 more columns]

## Sheet: SM3
Supplemental materials SM3: STRING enrichment analysis: proteins downregulated cytosolic but not in presence of LaCl3
#category term ID term description observed gene count background gene count strength false discovery rate matching proteins in your network (IDs) matching proteins in your network (labels)
[truncated: 174 more rows]
[truncated: 119 more columns]
